# Supplementary material for: Transcription Profiling of Monocyte-Derived Macrophages Infected In Vitro With Two Strains of Streptococcus agalactiae Reveals Candidate Pathways Affecting Subclinical Mastitis in Cattle
Source: Front Genet. 2019 Jul 26;10:689. doi: 10.3389/fgene.2019.00689 (PMC6681682; doi:10.3389/fgene.2019.00689)
Supplement: Supplementary file 4 [file Table_4.xlsx]

## Sheet: Supplementary Table 4
Supplementary Table 4.
Differentially expressed (DE) genes in bovine monocyte-derived macrophages (bMDM) infected with strain ST103 or strain ST12 of Streptococcus agalactiae, compared to the respective negative controls, as identified by both edgeR and DESeq2. DE genes were considered as significant when both False Discovery Rate (FDR) was < 0.05 in edgeR and Benjamini and Hochberg corrected P-value (adjusted) was < 0…

## Sheet: DE genes 
Significant DE genes_control vs. ST103	Significant DE genes_control vs. ST12	Significant DE genes_ST103 vs. ST12
ENSBTAG00000004337	ENSBTAG00000010998	ENSBTAG00000010069
ENSBTAG00000018015	ENSBTAG00000004337	ENSBTAG00000010238
ENSBTAG00000040078	ENSBTAG00000021035	ENSBTAG00000004337
ENSBTAG00000020892	ENSBTAG00000018015	ENSBTAG00000012380
ENSBTAG00000010998	ENSBTAG00000020892	ENSBTAG00000007783
ENSBTAG00000022813	ENSBTAG00000010888	ENSBTAG00000025853
ENSBTAG00000005412	ENSBTAG00000031885	ENSBTAG00000015919
ENSBTAG00000021035	ENSBTAG00000005412	ENSBTAG00000015318
ENSBTAG00000002813	ENSBTAG00000040078	ENSBTAG00000008182
ENSBTAG00000003312	ENSBTAG00000003312	ENSBTAG00000026278
ENSBTAG00000012771	ENSBTAG00000022813	ENSBTAG00000002894
ENSBTAG00000037800	ENSBTAG00000012771	ENSBTAG00000001708
ENSBTAG00000016401	ENSBTAG00000037800	ENSBTAG00000004177
ENSBTAG00000031885	ENSBTAG00000013863	ENSBTAG00000011545
ENSBTAG00000038990	ENSBTAG00000001197	ENSBTAG00000019954
ENSBTAG00000002215	ENSBTAG00000002813	ENSBTAG00000020892
ENSBTAG00000018438	ENSBTAG00000006685	ENSBTAG00000016883
ENSBTAG00000010888	ENSBTAG00000016401	ENSBTAG00000008638
ENSBTAG00000020936	ENSBTAG00000012297	ENSBTAG00000018015
ENSBTAG00000013699	ENSBTAG00000002215	ENSBTAG00000015386
ENSBTAG00000011403	ENSBTAG00000018438	ENSBTAG00000040215
ENSBTAG00000012297	ENSBTAG00000001945	ENSBTAG00000025258
ENSBTAG00000021957	ENSBTAG00000011403	ENSBTAG00000000494
ENSBTAG00000008330	ENSBTAG00000008330	ENSBTAG00000025782
ENSBTAG00000001197	ENSBTAG00000044023	ENSBTAG00000004115
ENSBTAG00000008294	ENSBTAG00000008294	ENSBTAG00000007116
ENSBTAG00000001945	ENSBTAG00000013699	ENSBTAG00000040078
ENSBTAG00000044023	ENSBTAG00000003935	ENSBTAG00000014734
ENSBTAG00000002669	ENSBTAG00000032905	ENSBTAG00000011990
ENSBTAG00000005674	ENSBTAG00000005674	ENSBTAG00000016462
ENSBTAG00000013118	ENSBTAG00000020783	ENSBTAG00000018313
ENSBTAG00000002346	ENSBTAG00000019465	ENSBTAG00000008993
ENSBTAG00000006685	ENSBTAG00000001294	ENSBTAG00000000016
ENSBTAG00000025405	ENSBTAG00000021176	ENSBTAG00000031648
ENSBTAG00000018290	ENSBTAG00000009012	ENSBTAG00000019796
ENSBTAG00000007783	ENSBTAG00000046158	ENSBTAG00000019434
ENSBTAG00000046158	ENSBTAG00000025405	ENSBTAG00000000454
ENSBTAG00000000016	ENSBTAG00000009426	ENSBTAG00000038990
ENSBTAG00000021176	ENSBTAG00000002669	ENSBTAG00000010812
ENSBTAG00000002894	ENSBTAG00000007718	ENSBTAG00000011851
ENSBTAG00000013863	ENSBTAG00000021187	ENSBTAG00000017095
ENSBTAG00000019465	ENSBTAG00000020456	ENSBTAG00000012972
ENSBTAG00000005496	ENSBTAG00000000704	ENSBTAG00000011770
ENSBTAG00000020456	ENSBTAG00000013210	ENSBTAG00000015482
ENSBTAG00000020783	ENSBTAG00000017201	ENSBTAG00000004322
ENSBTAG00000007718	ENSBTAG00000012902	ENSBTAG00000038488
ENSBTAG00000009012	ENSBTAG00000013118	ENSBTAG00000020936
ENSBTAG00000014553	ENSBTAG00000038990	ENSBTAG00000003339
ENSBTAG00000014087	ENSBTAG00000002977	ENSBTAG00000004240
ENSBTAG00000000203	ENSBTAG00000002346	ENSBTAG00000002175
ENSBTAG00000000704	ENSBTAG00000018290	ENSBTAG00000007746
ENSBTAG00000003358	ENSBTAG00000010745	ENSBTAG00000006324
ENSBTAG00000003935	ENSBTAG00000015127	ENSBTAG00000022991
ENSBTAG00000032905	ENSBTAG00000005160	ENSBTAG00000015974
ENSBTAG00000009426	ENSBTAG00000007596	ENSBTAG00000019652
ENSBTAG00000010745	ENSBTAG00000020872	ENSBTAG00000008959
ENSBTAG00000012961	ENSBTAG00000021957	ENSBTAG00000007334
ENSBTAG00000020872	ENSBTAG00000017150	ENSBTAG00000009665
ENSBTAG00000001294	ENSBTAG00000000203	ENSBTAG00000025822
ENSBTAG00000012442	ENSBTAG00000005496	ENSBTAG00000009101
ENSBTAG00000017363	ENSBTAG00000020936	ENSBTAG00000011437
ENSBTAG00000027937	ENSBTAG00000002595	ENSBTAG00000000067
ENSBTAG00000002977	ENSBTAG00000001468	ENSBTAG00000030650
ENSBTAG00000021187	ENSBTAG00000008497	ENSBTAG00000013793
ENSBTAG00000007927	ENSBTAG00000007927	ENSBTAG00000047345
ENSBTAG00000009354	ENSBTAG00000005960	ENSBTAG00000008100
ENSBTAG00000012902	ENSBTAG00000009368	ENSBTAG00000001368
ENSBTAG00000006039	ENSBTAG00000002912	ENSBTAG00000012365
ENSBTAG00000045822	ENSBTAG00000006801	ENSBTAG00000032518
ENSBTAG00000024539	ENSBTAG00000010835	ENSBTAG00000021957
ENSBTAG00000010347	ENSBTAG00000002362	ENSBTAG00000012112
ENSBTAG00000017201	ENSBTAG00000012961	ENSBTAG00000023976
ENSBTAG00000013210	ENSBTAG00000012442	ENSBTAG00000004436
ENSBTAG00000005960	ENSBTAG00000006721	ENSBTAG00000017085
ENSBTAG00000013496	ENSBTAG00000014432	ENSBTAG00000001235
ENSBTAG00000005030	ENSBTAG00000014087	ENSBTAG00000014373
ENSBTAG00000001468	ENSBTAG00000003358	ENSBTAG00000004376
ENSBTAG00000002912	ENSBTAG00000017363	ENSBTAG00000025391
ENSBTAG00000021672	ENSBTAG00000025462	ENSBTAG00000047330
ENSBTAG00000007280	ENSBTAG00000021658	ENSBTAG00000008453
ENSBTAG00000002595	ENSBTAG00000000396	ENSBTAG00000014006
ENSBTAG00000003741	ENSBTAG00000011970	ENSBTAG00000018165
ENSBTAG00000006132	ENSBTAG00000010923	ENSBTAG00000030930
ENSBTAG00000020713	ENSBTAG00000011007	ENSBTAG00000014113
ENSBTAG00000012216	ENSBTAG00000014306	ENSBTAG00000014465
ENSBTAG00000021501	ENSBTAG00000027937	ENSBTAG00000003907
ENSBTAG00000013664	ENSBTAG00000017455	ENSBTAG00000045744
ENSBTAG00000025462	ENSBTAG00000044058	ENSBTAG00000016762
ENSBTAG00000047502	ENSBTAG00000019131	ENSBTAG00000010273
ENSBTAG00000009663	ENSBTAG00000019225	ENSBTAG00000001395
ENSBTAG00000010835	ENSBTAG00000021501	ENSBTAG00000009780
ENSBTAG00000044058	ENSBTAG00000000016	ENSBTAG00000016354
ENSBTAG00000005160	ENSBTAG00000045822	ENSBTAG00000017002
ENSBTAG00000008497	ENSBTAG00000019866	ENSBTAG00000007596
ENSBTAG00000020172	ENSBTAG00000003709	ENSBTAG00000002979
ENSBTAG00000000191	ENSBTAG00000009863	ENSBTAG00000006843
ENSBTAG00000014653	ENSBTAG00000009354	ENSBTAG00000001022
ENSBTAG00000015512	ENSBTAG00000026309	ENSBTAG00000001388
ENSBTAG00000019225	ENSBTAG00000012066	ENSBTAG00000003313
ENSBTAG00000016533	ENSBTAG00000005976	ENSBTAG00000014972
ENSBTAG00000005275	ENSBTAG00000020242	ENSBTAG00000004556
ENSBTAG00000002006	ENSBTAG00000007424	ENSBTAG00000017958
ENSBTAG00000019866	ENSBTAG00000015316	ENSBTAG00000031940
ENSBTAG00000006721	ENSBTAG00000013578	ENSBTAG00000017564
ENSBTAG00000013578	ENSBTAG00000014730	ENSBTAG00000017450
ENSBTAG00000017150	ENSBTAG00000015195	ENSBTAG00000002623
ENSBTAG00000009863	ENSBTAG00000013664	ENSBTAG00000008916
ENSBTAG00000011970	ENSBTAG00000013496	ENSBTAG00000003111
ENSBTAG00000023659	ENSBTAG00000008545	ENSBTAG00000008635
ENSBTAG00000018403	ENSBTAG00000002894	ENSBTAG00000011829
ENSBTAG00000019131	ENSBTAG00000014553	ENSBTAG00000019250
ENSBTAG00000011007	ENSBTAG00000003176	ENSBTAG00000006748
ENSBTAG00000003176	ENSBTAG00000045588	ENSBTAG00000005898
ENSBTAG00000013196	ENSBTAG00000012216	ENSBTAG00000015891
ENSBTAG00000011354	ENSBTAG00000016269	ENSBTAG00000014612
ENSBTAG00000018722	ENSBTAG00000006132	ENSBTAG00000047676
ENSBTAG00000011957	ENSBTAG00000000191	ENSBTAG00000011765
ENSBTAG00000046672	ENSBTAG00000021672	ENSBTAG00000020958
ENSBTAG00000011997	ENSBTAG00000017852	ENSBTAG00000040190
ENSBTAG00000015127	ENSBTAG00000005030	ENSBTAG00000014777
ENSBTAG00000002362	ENSBTAG00000017763	ENSBTAG00000003808
ENSBTAG00000000396	ENSBTAG00000024918	ENSBTAG00000001942
ENSBTAG00000003709	ENSBTAG00000016255	ENSBTAG00000030648
ENSBTAG00000014151	ENSBTAG00000005828	ENSBTAG00000008805
ENSBTAG00000007520	ENSBTAG00000006797	ENSBTAG00000001114
ENSBTAG00000017113	ENSBTAG00000002296	ENSBTAG00000038496
ENSBTAG00000017455	ENSBTAG00000006616	ENSBTAG00000006346
ENSBTAG00000014367	ENSBTAG00000001579	ENSBTAG00000015413
ENSBTAG00000016269	ENSBTAG00000017263	ENSBTAG00000006282
ENSBTAG00000000277	ENSBTAG00000011354	ENSBTAG00000014958
ENSBTAG00000015060	ENSBTAG00000038104	ENSBTAG00000002298
ENSBTAG00000038048	ENSBTAG00000005018	ENSBTAG00000011003
ENSBTAG00000015195	ENSBTAG00000020433	ENSBTAG00000017074
ENSBTAG00000018905	ENSBTAG00000017721	ENSBTAG00000026842
ENSBTAG00000009368	ENSBTAG00000015060	ENSBTAG00000031795
ENSBTAG00000007139	ENSBTAG00000007592	ENSBTAG00000021921
ENSBTAG00000003936	ENSBTAG00000005090	ENSBTAG00000016943
ENSBTAG00000014432	ENSBTAG00000038283	ENSBTAG00000011957
ENSBTAG00000006707	ENSBTAG00000017801	ENSBTAG00000000363
ENSBTAG00000008743	ENSBTAG00000008743	ENSBTAG00000032603
ENSBTAG00000012981	ENSBTAG00000005275	ENSBTAG00000013290
ENSBTAG00000005828	ENSBTAG00000006039	ENSBTAG00000013464
ENSBTAG00000007592	ENSBTAG00000007280	ENSBTAG00000014558
ENSBTAG00000018784	ENSBTAG00000004269	ENSBTAG00000002020
ENSBTAG00000017763	ENSBTAG00000013405	ENSBTAG00000008204
ENSBTAG00000014306	ENSBTAG00000003936	ENSBTAG00000016291
ENSBTAG00000009417	ENSBTAG00000020713	ENSBTAG00000001573
ENSBTAG00000017721	ENSBTAG00000016906	ENSBTAG00000009477
ENSBTAG00000015318	ENSBTAG00000002596	ENSBTAG00000011011
ENSBTAG00000012066	ENSBTAG00000020172	ENSBTAG00000014377
ENSBTAG00000017852	ENSBTAG00000024539	ENSBTAG00000002993
ENSBTAG00000024958	ENSBTAG00000002658	ENSBTAG00000008827
ENSBTAG00000039992	ENSBTAG00000010083	ENSBTAG00000020266
ENSBTAG00000017263	ENSBTAG00000007836	ENSBTAG00000007130
ENSBTAG00000015580	ENSBTAG00000044208	ENSBTAG00000005018
ENSBTAG00000005976	ENSBTAG00000024387	ENSBTAG00000046320
ENSBTAG00000007931	ENSBTAG00000007520	ENSBTAG00000004225
ENSBTAG00000047739	ENSBTAG00000023659	ENSBTAG00000007931
ENSBTAG00000002658	ENSBTAG00000047502	ENSBTAG00000013869
ENSBTAG00000020433	ENSBTAG00000011997	ENSBTAG00000021999
ENSBTAG00000004542	ENSBTAG00000018192	ENSBTAG00000015513
ENSBTAG00000002296	ENSBTAG00000019510	ENSBTAG00000009902
ENSBTAG00000008545	ENSBTAG00000018951	ENSBTAG00000016260
ENSBTAG00000017393	ENSBTAG00000018069	ENSBTAG00000046503
ENSBTAG00000021658	ENSBTAG00000009948	ENSBTAG00000009985
ENSBTAG00000006492	ENSBTAG00000047107	ENSBTAG00000010964
ENSBTAG00000002596	ENSBTAG00000046672	ENSBTAG00000015107
ENSBTAG00000007424	ENSBTAG00000021680	ENSBTAG00000011017
ENSBTAG00000017801	ENSBTAG00000023377	ENSBTAG00000009362
ENSBTAG00000008331	ENSBTAG00000018905	ENSBTAG00000011368
ENSBTAG00000026309	ENSBTAG00000001066	ENSBTAG00000011742
ENSBTAG00000007836	ENSBTAG00000017113	ENSBTAG00000009657
ENSBTAG00000014970	ENSBTAG00000000277	ENSBTAG00000016005
ENSBTAG00000007828	ENSBTAG00000026283	ENSBTAG00000045588
ENSBTAG00000001066	ENSBTAG00000009770	ENSBTAG00000000675
ENSBTAG00000007596	ENSBTAG00000012981	ENSBTAG00000032839
ENSBTAG00000001579	ENSBTAG00000010347	ENSBTAG00000003341
ENSBTAG00000032089	ENSBTAG00000012768	ENSBTAG00000011593
ENSBTAG00000018382	ENSBTAG00000006136	ENSBTAG00000005218
ENSBTAG00000013489	ENSBTAG00000012545	ENSBTAG00000008705
ENSBTAG00000047855	ENSBTAG00000013367	ENSBTAG00000002999
ENSBTAG00000007840	ENSBTAG00000018593	ENSBTAG00000000859
ENSBTAG00000006136	ENSBTAG00000015913	ENSBTAG00000019341
ENSBTAG00000014465	ENSBTAG00000018403	ENSBTAG00000010242
ENSBTAG00000021680	ENSBTAG00000007783	ENSBTAG00000021288
ENSBTAG00000001022	ENSBTAG00000014367	ENSBTAG00000009641
ENSBTAG00000012545	ENSBTAG00000011419	ENSBTAG00000013196
ENSBTAG00000017287	ENSBTAG00000006492	ENSBTAG00000006678
ENSBTAG00000040518	ENSBTAG00000003820	ENSBTAG00000004679
ENSBTAG00000014374	ENSBTAG00000003741	ENSBTAG00000001644
ENSBTAG00000023610	ENSBTAG00000016533	ENSBTAG00000005517
ENSBTAG00000009948	ENSBTAG00000016959	ENSBTAG00000001126
ENSBTAG00000006616	ENSBTAG00000002615	ENSBTAG00000000163
ENSBTAG00000006801	ENSBTAG00000009167	ENSBTAG00000009941
ENSBTAG00000024492	ENSBTAG00000004613	ENSBTAG00000034848
ENSBTAG00000018269	ENSBTAG00000024492	ENSBTAG00000003855
ENSBTAG00000005477	ENSBTAG00000006894	ENSBTAG00000001754
ENSBTAG00000010472	ENSBTAG00000022039	ENSBTAG00000014898
ENSBTAG00000038283	ENSBTAG00000002006	ENSBTAG00000014179
ENSBTAG00000019761	ENSBTAG00000020394	ENSBTAG00000015155
ENSBTAG00000031430	ENSBTAG00000017373	ENSBTAG00000026676
ENSBTAG00000004269	ENSBTAG00000014374	ENSBTAG00000018283
ENSBTAG00000024918	ENSBTAG00000004059	ENSBTAG00000037951
ENSBTAG00000026278	ENSBTAG00000008721	ENSBTAG00000020860
ENSBTAG00000010923	ENSBTAG00000018722	ENSBTAG00000008908
ENSBTAG00000009841	ENSBTAG00000006792	ENSBTAG00000009112
ENSBTAG00000009353	ENSBTAG00000001246	ENSBTAG00000000837
ENSBTAG00000025257	ENSBTAG00000047766	ENSBTAG00000017404
ENSBTAG00000001246	ENSBTAG00000015512	ENSBTAG00000013057
ENSBTAG00000010083	ENSBTAG00000025471	ENSBTAG00000008964
ENSBTAG00000008721	ENSBTAG00000007649	ENSBTAG00000002742
ENSBTAG00000003422	ENSBTAG00000010171	ENSBTAG00000046409
ENSBTAG00000013910	ENSBTAG00000007139	ENSBTAG00000046117
ENSBTAG00000017775	ENSBTAG00000009417	ENSBTAG00000013527
ENSBTAG00000018281	ENSBTAG00000014599	ENSBTAG00000016498
ENSBTAG00000023259	ENSBTAG00000013489	ENSBTAG00000018131
ENSBTAG00000006720	ENSBTAG00000039992	ENSBTAG00000014537
ENSBTAG00000004059	ENSBTAG00000010597	ENSBTAG00000018138
ENSBTAG00000014113	ENSBTAG00000020060	ENSBTAG00000009236
ENSBTAG00000018430	ENSBTAG00000004556	ENSBTAG00000004216
ENSBTAG00000019510	ENSBTAG00000014855	ENSBTAG00000026637
ENSBTAG00000018593	ENSBTAG00000016680	ENSBTAG00000005947
ENSBTAG00000003820	ENSBTAG00000002959	ENSBTAG00000008114
ENSBTAG00000016906	ENSBTAG00000015432	ENSBTAG00000002326
ENSBTAG00000014855	ENSBTAG00000040518	ENSBTAG00000000964
ENSBTAG00000021291	ENSBTAG00000023610	ENSBTAG00000020345
ENSBTAG00000014730	ENSBTAG00000037735	ENSBTAG00000018546
ENSBTAG00000020296	ENSBTAG00000013981	ENSBTAG00000016730
ENSBTAG00000004394	ENSBTAG00000015580	ENSBTAG00000004580
ENSBTAG00000007523	ENSBTAG00000040128	ENSBTAG00000003222
ENSBTAG00000034875	ENSBTAG00000007578	ENSBTAG00000005227
ENSBTAG00000013192	ENSBTAG00000012817	ENSBTAG00000013387
ENSBTAG00000044208	ENSBTAG00000027676	ENSBTAG00000019293
ENSBTAG00000020755	ENSBTAG00000040512	ENSBTAG00000008632
ENSBTAG00000011238	ENSBTAG00000004305	ENSBTAG00000009994
ENSBTAG00000010059	ENSBTAG00000018784	ENSBTAG00000018419
ENSBTAG00000000962	ENSBTAG00000016873	ENSBTAG00000014611
ENSBTAG00000013981	ENSBTAG00000014151	ENSBTAG00000013308
ENSBTAG00000021955	ENSBTAG00000003842	ENSBTAG00000004066
ENSBTAG00000018192	ENSBTAG00000006561	ENSBTAG00000010449
ENSBTAG00000009770	ENSBTAG00000008248	ENSBTAG00000003519
ENSBTAG00000032369	ENSBTAG00000034875	ENSBTAG00000010756
ENSBTAG00000007268	ENSBTAG00000009663	ENSBTAG00000021636
ENSBTAG00000013367	ENSBTAG00000008193	ENSBTAG00000013477
ENSBTAG00000002085	ENSBTAG00000017719	ENSBTAG00000016782
ENSBTAG00000019954	ENSBTAG00000007374	ENSBTAG00000016980
ENSBTAG00000007578	ENSBTAG00000006663	ENSBTAG00000034159
ENSBTAG00000006999	ENSBTAG00000021291	ENSBTAG00000015716
ENSBTAG00000006792	ENSBTAG00000020294	ENSBTAG00000020164
ENSBTAG00000020242	ENSBTAG00000018975	ENSBTAG00000010963
ENSBTAG00000026283	ENSBTAG00000011446	ENSBTAG00000019617
ENSBTAG00000008193	ENSBTAG00000024605	ENSBTAG00000019910
ENSBTAG00000010344	ENSBTAG00000031430	ENSBTAG00000003602
ENSBTAG00000000676	ENSBTAG00000002349	ENSBTAG00000003741
ENSBTAG00000018578	ENSBTAG00000002745	ENSBTAG00000006797
ENSBTAG00000001390	ENSBTAG00000017713	ENSBTAG00000011121
ENSBTAG00000006771	ENSBTAG00000004378	ENSBTAG00000001510
ENSBTAG00000004331	ENSBTAG00000008053	ENSBTAG00000001662
ENSBTAG00000047766	ENSBTAG00000018488	ENSBTAG00000035735
ENSBTAG00000017875	ENSBTAG00000008021	ENSBTAG00000017393
ENSBTAG00000010597	ENSBTAG00000014127	ENSBTAG00000038430
ENSBTAG00000018855	ENSBTAG00000017775	ENSBTAG00000027722
ENSBTAG00000015913	ENSBTAG00000019967	ENSBTAG00000020937
ENSBTAG00000012817	ENSBTAG00000004549	ENSBTAG00000008419
ENSBTAG00000023377	ENSBTAG00000017038	ENSBTAG00000018040
ENSBTAG00000015038	ENSBTAG00000007840	ENSBTAG00000019123
ENSBTAG00000016873	ENSBTAG00000016388	ENSBTAG00000017797
ENSBTAG00000007624	ENSBTAG00000012938	ENSBTAG00000022715
ENSBTAG00000005668	ENSBTAG00000004394	ENSBTAG00000040551
ENSBTAG00000021918	ENSBTAG00000003616	ENSBTAG00000039023
ENSBTAG00000020043	ENSBTAG00000004659	ENSBTAG00000012074
ENSBTAG00000015432	ENSBTAG00000018382	ENSBTAG00000012047
ENSBTAG00000016388	ENSBTAG00000001621	ENSBTAG00000011887
ENSBTAG00000032558	ENSBTAG00000032089	ENSBTAG00000020403
ENSBTAG00000018248	ENSBTAG00000013858	ENSBTAG00000047679
ENSBTAG00000004378	ENSBTAG00000003081	ENSBTAG00000013905
ENSBTAG00000011437	ENSBTAG00000003395	ENSBTAG00000005503
ENSBTAG00000038104	ENSBTAG00000010303	ENSBTAG00000010774
ENSBTAG00000014249	ENSBTAG00000018785	ENSBTAG00000021932
ENSBTAG00000013451	ENSBTAG00000012815	ENSBTAG00000014995
ENSBTAG00000040128	ENSBTAG00000020865	ENSBTAG00000008006
ENSBTAG00000008579	ENSBTAG00000018248	ENSBTAG00000022813
ENSBTAG00000007644	ENSBTAG00000015591	ENSBTAG00000001470
ENSBTAG00000018723	ENSBTAG00000005668	ENSBTAG00000000936
ENSBTAG00000032436	ENSBTAG00000013960	ENSBTAG00000020330
ENSBTAG00000002478	ENSBTAG00000013451	ENSBTAG00000000682
ENSBTAG00000008998	ENSBTAG00000021978	ENSBTAG00000046566
ENSBTAG00000007865	ENSBTAG00000002085	ENSBTAG00000013208
ENSBTAG00000015326	ENSBTAG00000010344	ENSBTAG00000014605
ENSBTAG00000009061	ENSBTAG00000025257	ENSBTAG00000005716
ENSBTAG00000016498	ENSBTAG00000019079	ENSBTAG00000019900
ENSBTAG00000014238	ENSBTAG00000032436	ENSBTAG00000013311
ENSBTAG00000004018	ENSBTAG00000004150	ENSBTAG00000006364
ENSBTAG00000022039	ENSBTAG00000010987	ENSBTAG00000014615
ENSBTAG00000016255	ENSBTAG00000047904	ENSBTAG00000003763
ENSBTAG00000001621	ENSBTAG00000003994	ENSBTAG00000018421
ENSBTAG00000015061	ENSBTAG00000000843	ENSBTAG00000016007
ENSBTAG00000023028	ENSBTAG00000015038	ENSBTAG00000001161
ENSBTAG00000010563	ENSBTAG00000014261	ENSBTAG00000019704
ENSBTAG00000037811	ENSBTAG00000007661	ENSBTAG00000004899
ENSBTAG00000017719	ENSBTAG00000007268	ENSBTAG00000020710
ENSBTAG00000020394	ENSBTAG00000017875	ENSBTAG00000014166
ENSBTAG00000003994	ENSBTAG00000018723	ENSBTAG00000014659
ENSBTAG00000025258	ENSBTAG00000020755	ENSBTAG00000013790
ENSBTAG00000004879	ENSBTAG00000008436	ENSBTAG00000019437
ENSBTAG00000008431	ENSBTAG00000022779	ENSBTAG00000006765
ENSBTAG00000033702	ENSBTAG00000019761	ENSBTAG00000015509
ENSBTAG00000011373	ENSBTAG00000006707	ENSBTAG00000025856
ENSBTAG00000002326	ENSBTAG00000017905	ENSBTAG00000011394
ENSBTAG00000004613	ENSBTAG00000038931	ENSBTAG00000019592
ENSBTAG00000009611	ENSBTAG00000018855	ENSBTAG00000000770
ENSBTAG00000021521	ENSBTAG00000018269	ENSBTAG00000012833
ENSBTAG00000027879	ENSBTAG00000021318	ENSBTAG00000004913
ENSBTAG00000025250	ENSBTAG00000022689	ENSBTAG00000014099
ENSBTAG00000020958	ENSBTAG00000014653	ENSBTAG00000009109
ENSBTAG00000018488	ENSBTAG00000003614	ENSBTAG00000005891
ENSBTAG00000005181	ENSBTAG00000014068	ENSBTAG00000007734
ENSBTAG00000031814	ENSBTAG00000031686	ENSBTAG00000004939
ENSBTAG00000014599	ENSBTAG00000009287	ENSBTAG00000007921
ENSBTAG00000021072	ENSBTAG00000014471	ENSBTAG00000006777
ENSBTAG00000002349	ENSBTAG00000011238	ENSBTAG00000021372
ENSBTAG00000011446	ENSBTAG00000004331	ENSBTAG00000005286
ENSBTAG00000003616	ENSBTAG00000040585	ENSBTAG00000008142
ENSBTAG00000021978	ENSBTAG00000019663	ENSBTAG00000009085
ENSBTAG00000023375	ENSBTAG00000004005	ENSBTAG00000012829
ENSBTAG00000020053	ENSBTAG00000021705	ENSBTAG00000000199
ENSBTAG00000017038	ENSBTAG00000004542	ENSBTAG00000006718
ENSBTAG00000002472	ENSBTAG00000014923	ENSBTAG00000007901
ENSBTAG00000019348	ENSBTAG00000020602	ENSBTAG00000015896
ENSBTAG00000046841	ENSBTAG00000021512	ENSBTAG00000004755
ENSBTAG00000000961	ENSBTAG00000010563	ENSBTAG00000002730
ENSBTAG00000021076	ENSBTAG00000023851	ENSBTAG00000010564
ENSBTAG00000021945	ENSBTAG00000003113	ENSBTAG00000001105
ENSBTAG00000003559	ENSBTAG00000011415	ENSBTAG00000014665
ENSBTAG00000008248	ENSBTAG00000012667	ENSBTAG00000001002
ENSBTAG00000047107	ENSBTAG00000007644	ENSBTAG00000043250
ENSBTAG00000008091	ENSBTAG00000013099	ENSBTAG00000001193
ENSBTAG00000019138	ENSBTAG00000005998	ENSBTAG00000034689
ENSBTAG00000001470	ENSBTAG00000021893	ENSBTAG00000021209
ENSBTAG00000006561	ENSBTAG00000018653	ENSBTAG00000009127
ENSBTAG00000003880	ENSBTAG00000047600	ENSBTAG00000007167
ENSBTAG00000002586	ENSBTAG00000005439	ENSBTAG00000046912
ENSBTAG00000005738	ENSBTAG00000016093	ENSBTAG00000047947
ENSBTAG00000018069	ENSBTAG00000021174	ENSBTAG00000019810
ENSBTAG00000012829	ENSBTAG00000025822	ENSBTAG00000009488
ENSBTAG00000007374	ENSBTAG00000016805	ENSBTAG00000001420
ENSBTAG00000016959	ENSBTAG00000018430	ENSBTAG00000009552
ENSBTAG00000020330	ENSBTAG00000020053	ENSBTAG00000008747
ENSBTAG00000022779	ENSBTAG00000008331	ENSBTAG00000006082
ENSBTAG00000037735	ENSBTAG00000006029	ENSBTAG00000008001
ENSBTAG00000001505	ENSBTAG00000021724	ENSBTAG00000008617
ENSBTAG00000011075	ENSBTAG00000008634	ENSBTAG00000017225
ENSBTAG00000019975	ENSBTAG00000003711	ENSBTAG00000020729
ENSBTAG00000011417	ENSBTAG00000018281	ENSBTAG00000019742
ENSBTAG00000018653	ENSBTAG00000011583	ENSBTAG00000008314
ENSBTAG00000016208	ENSBTAG00000021064	ENSBTAG00000016167
ENSBTAG00000012667	ENSBTAG00000006543	ENSBTAG00000000974
ENSBTAG00000047600	ENSBTAG00000009496	ENSBTAG00000044038
ENSBTAG00000007191	ENSBTAG00000002586	ENSBTAG00000006330
ENSBTAG00000039892	ENSBTAG00000006510	ENSBTAG00000015326
ENSBTAG00000009496	ENSBTAG00000046054	ENSBTAG00000019376
ENSBTAG00000000735	ENSBTAG00000017287	ENSBTAG00000005819
ENSBTAG00000022895	ENSBTAG00000024815	ENSBTAG00000002412
ENSBTAG00000020173	ENSBTAG00000006720	ENSBTAG00000017776
ENSBTAG00000014471	ENSBTAG00000001788	ENSBTAG00000015369
ENSBTAG00000046981	ENSBTAG00000000436	ENSBTAG00000026428
ENSBTAG00000045588	ENSBTAG00000003559	ENSBTAG00000011105
ENSBTAG00000004322	ENSBTAG00000000735	ENSBTAG00000018577
ENSBTAG00000047839	ENSBTAG00000019458	ENSBTAG00000006995
ENSBTAG00000014068	ENSBTAG00000008998	ENSBTAG00000009231
ENSBTAG00000017373	ENSBTAG00000011316	ENSBTAG00000013009
ENSBTAG00000016795	ENSBTAG00000020355	ENSBTAG00000015316
ENSBTAG00000008634	ENSBTAG00000019621	ENSBTAG00000010959
ENSBTAG00000008436	ENSBTAG00000014199	ENSBTAG00000031701
ENSBTAG00000004305	ENSBTAG00000008579	ENSBTAG00000008530
ENSBTAG00000024387	ENSBTAG00000003751	ENSBTAG00000012738
ENSBTAG00000016680	ENSBTAG00000002243	ENSBTAG00000006322
ENSBTAG00000013905	ENSBTAG00000017547	ENSBTAG00000004745
ENSBTAG00000027446	ENSBTAG00000014310	ENSBTAG00000042649
ENSBTAG00000021999	ENSBTAG00000020043	ENSBTAG00000044169
ENSBTAG00000003610	ENSBTAG00000038048	ENSBTAG00000005791
ENSBTAG00000011851	ENSBTAG00000007320	ENSBTAG00000013825
ENSBTAG00000004177	ENSBTAG00000021919	ENSBTAG00000012946
ENSBTAG00000031707	ENSBTAG00000000859	ENSBTAG00000010652
ENSBTAG00000007659	ENSBTAG00000014238	ENSBTAG00000009805
ENSBTAG00000003081	ENSBTAG00000011857	ENSBTAG00000009183
ENSBTAG00000003711	ENSBTAG00000011548	ENSBTAG00000044173
ENSBTAG00000007636	ENSBTAG00000021072	ENSBTAG00000009142
ENSBTAG00000016998	ENSBTAG00000016998	ENSBTAG00000018718
ENSBTAG00000004150	ENSBTAG00000006645	ENSBTAG00000019885
ENSBTAG00000015644	ENSBTAG00000015731	ENSBTAG00000020180
ENSBTAG00000011512	ENSBTAG00000011104	ENSBTAG00000021023
ENSBTAG00000012137	ENSBTAG00000015632	ENSBTAG00000000292
ENSBTAG00000014714	ENSBTAG00000009353	ENSBTAG00000013244
ENSBTAG00000006859	ENSBTAG00000019975	ENSBTAG00000000868
ENSBTAG00000005090	ENSBTAG00000033702	ENSBTAG00000000937
ENSBTAG00000047345	ENSBTAG00000011512	ENSBTAG00000032369
ENSBTAG00000018951	ENSBTAG00000014512	ENSBTAG00000005313
ENSBTAG00000013371	ENSBTAG00000007130	ENSBTAG00000020701
ENSBTAG00000021174	ENSBTAG00000003880	ENSBTAG00000016139
ENSBTAG00000008329	ENSBTAG00000021880	ENSBTAG00000040206
ENSBTAG00000016513	ENSBTAG00000023259	ENSBTAG00000018417
ENSBTAG00000012519	ENSBTAG00000006957	ENSBTAG00000019854
ENSBTAG00000024240	ENSBTAG00000011787	ENSBTAG00000015683
ENSBTAG00000031824	ENSBTAG00000019347	ENSBTAG00000012550
ENSBTAG00000019663	ENSBTAG00000024958	ENSBTAG00000011729
ENSBTAG00000015793	ENSBTAG00000019686	ENSBTAG00000002669
ENSBTAG00000001788	ENSBTAG00000000676	ENSBTAG00000001179
ENSBTAG00000027676	ENSBTAG00000006999	ENSBTAG00000015978
ENSBTAG00000008611	ENSBTAG00000047739	ENSBTAG00000021520
ENSBTAG00000000920	ENSBTAG00000018077	ENSBTAG00000002050
ENSBTAG00000008530	ENSBTAG00000047855	ENSBTAG00000019989
ENSBTAG00000000308	ENSBTAG00000044079	ENSBTAG00000020431
ENSBTAG00000004066	ENSBTAG00000015644	ENSBTAG00000039347
ENSBTAG00000008021	ENSBTAG00000031824	ENSBTAG00000001273
ENSBTAG00000001564	ENSBTAG00000002478	ENSBTAG00000005477
ENSBTAG00000007116	ENSBTAG00000013196	ENSBTAG00000038048
ENSBTAG00000015316	ENSBTAG00000008431	ENSBTAG00000011857
ENSBTAG00000006894	ENSBTAG00000046841	ENSBTAG00000007323
ENSBTAG00000009287	ENSBTAG00000019665	ENSBTAG00000018349
ENSBTAG00000013222	ENSBTAG00000016513	ENSBTAG00000017164
ENSBTAG00000021064	ENSBTAG00000007191	ENSBTAG00000019639
ENSBTAG00000003751	ENSBTAG00000006125	ENSBTAG00000014150
ENSBTAG00000023718	ENSBTAG00000016208	ENSBTAG00000015077
ENSBTAG00000013099	ENSBTAG00000009717	ENSBTAG00000001282
ENSBTAG00000026429	ENSBTAG00000018101	ENSBTAG00000032331
ENSBTAG00000031962	ENSBTAG00000023028	ENSBTAG00000011147
ENSBTAG00000009579	ENSBTAG00000014707	ENSBTAG00000039719
ENSBTAG00000047904	ENSBTAG00000012519	ENSBTAG00000007346
ENSBTAG00000013960	ENSBTAG00000023179	ENSBTAG00000019015
ENSBTAG00000013869	ENSBTAG00000019348	ENSBTAG00000034918
ENSBTAG00000031435	ENSBTAG00000016593	ENSBTAG00000014123
ENSBTAG00000009159	ENSBTAG00000018097	ENSBTAG00000016572
ENSBTAG00000018189	ENSBTAG00000002922	ENSBTAG00000003639
ENSBTAG00000006029	ENSBTAG00000010568	ENSBTAG00000013414
ENSBTAG00000009784	ENSBTAG00000019202	ENSBTAG00000004086
ENSBTAG00000019767	ENSBTAG00000021945	ENSBTAG00000002313
ENSBTAG00000018646	ENSBTAG00000006323	ENSBTAG00000005414
ENSBTAG00000014906	ENSBTAG00000008611	ENSBTAG00000008696
ENSBTAG00000013405	ENSBTAG00000014970	ENSBTAG00000021364
ENSBTAG00000009167	ENSBTAG00000012589	ENSBTAG00000037470
ENSBTAG00000002922	ENSBTAG00000013579	ENSBTAG00000031590
ENSBTAG00000008600	ENSBTAG00000012176	ENSBTAG00000006640
ENSBTAG00000016771	ENSBTAG00000021435	ENSBTAG00000006335
ENSBTAG00000015016	ENSBTAG00000021918	ENSBTAG00000009663
ENSBTAG00000006078	ENSBTAG00000000040	ENSBTAG00000004976
ENSBTAG00000001778	ENSBTAG00000038107	ENSBTAG00000000998
ENSBTAG00000017713	ENSBTAG00000009841	ENSBTAG00000006883
ENSBTAG00000005998	ENSBTAG00000007784	ENSBTAG00000008648
ENSBTAG00000014093	ENSBTAG00000003422	ENSBTAG00000008665
ENSBTAG00000017074	ENSBTAG00000020070	ENSBTAG00000010514
ENSBTAG00000007649	ENSBTAG00000000928	ENSBTAG00000001562
ENSBTAG00000021512	ENSBTAG00000007066	ENSBTAG00000013631
ENSBTAG00000019665	ENSBTAG00000002472	ENSBTAG00000039794
ENSBTAG00000019617	ENSBTAG00000037811	ENSBTAG00000002481
ENSBTAG00000038488	ENSBTAG00000025250	ENSBTAG00000007828
ENSBTAG00000038931	ENSBTAG00000009064	ENSBTAG00000014653
ENSBTAG00000018097	ENSBTAG00000017639	ENSBTAG00000047122
ENSBTAG00000015749	ENSBTAG00000000308	ENSBTAG00000045518
ENSBTAG00000007409	ENSBTAG00000016163	ENSBTAG00000020959
ENSBTAG00000018785	ENSBTAG00000039892	ENSBTAG00000009139
ENSBTAG00000009064	ENSBTAG00000020296	ENSBTAG00000011419
ENSBTAG00000003825	ENSBTAG00000047077	ENSBTAG00000005195
ENSBTAG00000011102	ENSBTAG00000006692	ENSBTAG00000017128
ENSBTAG00000019458	ENSBTAG00000015286	ENSBTAG00000008555
ENSBTAG00000038490	ENSBTAG00000014744	ENSBTAG00000005049
ENSBTAG00000020602	ENSBTAG00000009611	ENSBTAG00000008181
ENSBTAG00000006125	ENSBTAG00000020635	ENSBTAG00000011258
ENSBTAG00000014679	ENSBTAG00000017393	ENSBTAG00000016294
ENSBTAG00000022920	ENSBTAG00000006270	ENSBTAG00000039662
ENSBTAG00000003014	ENSBTAG00000018986	ENSBTAG00000024889
ENSBTAG00000003506	ENSBTAG00000039513	ENSBTAG00000015145
ENSBTAG00000047545	ENSBTAG00000023073	ENSBTAG00000017824
ENSBTAG00000046054	ENSBTAG00000006771	ENSBTAG00000044204
ENSBTAG00000044079	ENSBTAG00000013910	ENSBTAG00000000359
ENSBTAG00000009543	ENSBTAG00000018578	ENSBTAG00000016551
ENSBTAG00000014261	ENSBTAG00000010309	ENSBTAG00000005565
ENSBTAG00000020060	ENSBTAG00000007137	ENSBTAG00000011197
ENSBTAG00000033727	ENSBTAG00000008091	ENSBTAG00000019723
ENSBTAG00000004741	ENSBTAG00000007659	ENSBTAG00000039374
ENSBTAG00000002243	ENSBTAG00000030589	ENSBTAG00000010472
ENSBTAG00000009681	ENSBTAG00000023375	ENSBTAG00000001635
ENSBTAG00000012768	ENSBTAG00000005384	ENSBTAG00000007878
ENSBTAG00000012365	ENSBTAG00000045828	ENSBTAG00000011911
ENSBTAG00000015271	ENSBTAG00000014284	ENSBTAG00000032084
ENSBTAG00000006519	ENSBTAG00000011397	ENSBTAG00000009838
ENSBTAG00000039197	ENSBTAG00000011957	ENSBTAG00000014907
ENSBTAG00000015632	ENSBTAG00000011988	ENSBTAG00000000830
ENSBTAG00000005923	ENSBTAG00000010059	ENSBTAG00000015945
ENSBTAG00000015353	ENSBTAG00000009681	ENSBTAG00000000563
ENSBTAG00000014512	ENSBTAG00000003827	ENSBTAG00000009446
ENSBTAG00000003113	ENSBTAG00000015646	ENSBTAG00000000023
ENSBTAG00000013858	ENSBTAG00000021955	ENSBTAG00000017788
ENSBTAG00000007066	ENSBTAG00000000900	ENSBTAG00000003535
ENSBTAG00000018975	ENSBTAG00000013371	ENSBTAG00000014814
ENSBTAG00000026148	ENSBTAG00000016615	ENSBTAG00000008399
ENSBTAG00000019312	ENSBTAG00000001872	ENSBTAG00000009455
ENSBTAG00000016005	ENSBTAG00000014548	ENSBTAG00000005663
ENSBTAG00000011011	ENSBTAG00000018275	ENSBTAG00000004547
ENSBTAG00000018254	ENSBTAG00000013096	ENSBTAG00000002121
ENSBTAG00000024815	ENSBTAG00000014249	ENSBTAG00000024503
ENSBTAG00000009211	ENSBTAG00000035587	ENSBTAG00000021785
ENSBTAG00000014923	ENSBTAG00000000961	ENSBTAG00000001243
ENSBTAG00000003827	ENSBTAG00000008353	ENSBTAG00000000807
ENSBTAG00000005008	ENSBTAG00000007624	ENSBTAG00000002163
ENSBTAG00000026637	ENSBTAG00000002951	ENSBTAG00000024633
ENSBTAG00000014665	ENSBTAG00000004552	ENSBTAG00000010777
ENSBTAG00000040427	ENSBTAG00000011373	ENSBTAG00000018531
ENSBTAG00000019070	ENSBTAG00000045854	ENSBTAG00000016053
ENSBTAG00000020192	ENSBTAG00000013192	ENSBTAG00000020848
ENSBTAG00000004552	ENSBTAG00000007300	ENSBTAG00000033255
ENSBTAG00000012938	ENSBTAG00000038831	ENSBTAG00000027764
ENSBTAG00000021705	ENSBTAG00000019512	ENSBTAG00000045530
ENSBTAG00000005280	ENSBTAG00000011358	ENSBTAG00000008172
ENSBTAG00000014560	ENSBTAG00000017096	ENSBTAG00000044427
ENSBTAG00000021166	ENSBTAG00000014714	ENSBTAG00000018674
ENSBTAG00000008053	ENSBTAG00000046671	ENSBTAG00000015707
ENSBTAG00000001097	ENSBTAG00000008271	ENSBTAG00000003399
ENSBTAG00000018694	ENSBTAG00000021822	ENSBTAG00000047827
ENSBTAG00000010587	ENSBTAG00000006523	ENSBTAG00000005039
ENSBTAG00000014199	ENSBTAG00000045658	ENSBTAG00000003762
ENSBTAG00000019432	ENSBTAG00000019138	ENSBTAG00000013114
ENSBTAG00000027337	ENSBTAG00000017283	ENSBTAG00000032166
ENSBTAG00000019686	ENSBTAG00000015793	ENSBTAG00000001446
ENSBTAG00000009777	ENSBTAG00000018735	ENSBTAG00000030337
ENSBTAG00000006797	ENSBTAG00000001987	ENSBTAG00000014127
ENSBTAG00000014548	ENSBTAG00000027446	ENSBTAG00000038577
ENSBTAG00000009101	ENSBTAG00000007523	ENSBTAG00000009207
ENSBTAG00000039513	ENSBTAG00000018984	ENSBTAG00000042458
ENSBTAG00000040512	ENSBTAG00000015061	ENSBTAG00000021720
ENSBTAG00000007661	ENSBTAG00000007828	ENSBTAG00000038333
ENSBTAG00000004243	ENSBTAG00000008884	ENSBTAG00000007453
ENSBTAG00000022689	ENSBTAG00000016795	ENSBTAG00000008388
ENSBTAG00000007847	ENSBTAG00000014027	ENSBTAG00000038434
ENSBTAG00000030589	ENSBTAG00000010341	ENSBTAG00000017846
ENSBTAG00000013790	ENSBTAG00000000049	ENSBTAG00000010943
ENSBTAG00000011316	ENSBTAG00000009996	ENSBTAG00000006666
ENSBTAG00000016593	ENSBTAG00000017007	ENSBTAG00000013612
ENSBTAG00000021318	ENSBTAG00000021660	ENSBTAG00000043981
ENSBTAG00000003614	ENSBTAG00000016522	ENSBTAG00000006672
ENSBTAG00000010662	ENSBTAG00000026148	ENSBTAG00000000693
ENSBTAG00000006523	ENSBTAG00000046699	ENSBTAG00000007881
ENSBTAG00000019202	ENSBTAG00000047473	ENSBTAG00000034222
ENSBTAG00000012737	ENSBTAG00000007867	ENSBTAG00000017543
ENSBTAG00000021249	ENSBTAG00000004402	ENSBTAG00000025929
ENSBTAG00000006663	ENSBTAG00000009602	ENSBTAG00000017745
ENSBTAG00000044010	ENSBTAG00000010472	ENSBTAG00000012065
ENSBTAG00000021822	ENSBTAG00000009785	ENSBTAG00000000598
ENSBTAG00000005018	ENSBTAG00000012137	ENSBTAG00000047567
ENSBTAG00000031648	ENSBTAG00000016566	ENSBTAG00000007719
ENSBTAG00000023629	ENSBTAG00000010153	ENSBTAG00000011088
ENSBTAG00000000900	ENSBTAG00000014113	ENSBTAG00000012784
ENSBTAG00000004347	ENSBTAG00000003327	ENSBTAG00000014553
ENSBTAG00000015334	ENSBTAG00000040427	ENSBTAG00000020781
ENSBTAG00000000205	ENSBTAG00000013150	ENSBTAG00000004962
ENSBTAG00000019347	ENSBTAG00000001564	ENSBTAG00000006134
ENSBTAG00000000671	ENSBTAG00000016771	ENSBTAG00000001415
ENSBTAG00000040607	ENSBTAG00000023629	ENSBTAG00000006898
ENSBTAG00000019967	ENSBTAG00000002579	ENSBTAG00000032764
ENSBTAG00000005453	ENSBTAG00000006859	ENSBTAG00000017273
ENSBTAG00000047330	ENSBTAG00000001683	ENSBTAG00000015053
ENSBTAG00000007867	ENSBTAG00000025644	ENSBTAG00000047412
ENSBTAG00000000861	ENSBTAG00000009579	ENSBTAG00000018898
ENSBTAG00000025644	ENSBTAG00000019023	ENSBTAG00000016050
ENSBTAG00000001257	ENSBTAG00000003506	ENSBTAG00000012168
ENSBTAG00000025260	ENSBTAG00000000132	ENSBTAG00000011257
ENSBTAG00000000928	ENSBTAG00000007865	ENSBTAG00000003221
ENSBTAG00000018451	ENSBTAG00000005738	ENSBTAG00000009079
ENSBTAG00000008010	ENSBTAG00000009061	ENSBTAG00000003959
ENSBTAG00000014841	ENSBTAG00000001314	ENSBTAG00000011511
ENSBTAG00000025471	ENSBTAG00000006223	ENSBTAG00000002882
ENSBTAG00000031231	ENSBTAG00000017457	ENSBTAG00000010166
ENSBTAG00000026993	ENSBTAG00000000920	ENSBTAG00000016804
ENSBTAG00000021932	ENSBTAG00000025413	ENSBTAG00000012564
ENSBTAG00000003667	ENSBTAG00000020192	ENSBTAG00000009580
ENSBTAG00000015591	ENSBTAG00000001592	ENSBTAG00000007170
ENSBTAG00000016883	ENSBTAG00000008736	ENSBTAG00000048253
ENSBTAG00000013988	ENSBTAG00000020428	ENSBTAG00000011825
ENSBTAG00000011397	ENSBTAG00000006572	ENSBTAG00000010063
ENSBTAG00000009717	ENSBTAG00000006241	ENSBTAG00000009084
ENSBTAG00000031561	ENSBTAG00000020648	ENSBTAG00000006155
ENSBTAG00000010971	ENSBTAG00000003610	ENSBTAG00000002002
ENSBTAG00000046699	ENSBTAG00000010982	ENSBTAG00000008592
ENSBTAG00000045854	ENSBTAG00000004879	ENSBTAG00000006836
ENSBTAG00000000838	ENSBTAG00000003033	ENSBTAG00000011917
ENSBTAG00000016566	ENSBTAG00000021586	ENSBTAG00000008888
ENSBTAG00000016908	ENSBTAG00000002590	ENSBTAG00000007239
ENSBTAG00000010303	ENSBTAG00000031962	ENSBTAG00000026266
ENSBTAG00000015646	ENSBTAG00000000962
ENSBTAG00000001585	ENSBTAG00000002490
ENSBTAG00000017096	ENSBTAG00000020729
ENSBTAG00000046671	ENSBTAG00000035735
ENSBTAG00000030337	ENSBTAG00000006322
ENSBTAG00000013953	ENSBTAG00000009470
ENSBTAG00000023851	ENSBTAG00000018046
ENSBTAG00000011245	ENSBTAG00000014560
ENSBTAG00000016093	ENSBTAG00000013007
ENSBTAG00000013631	ENSBTAG00000004018
ENSBTAG00000008884	ENSBTAG00000002980
ENSBTAG00000021919	ENSBTAG00000003882
ENSBTAG00000022681	ENSBTAG00000009513
ENSBTAG00000011787	ENSBTAG00000015170
ENSBTAG00000015321	ENSBTAG00000010587
ENSBTAG00000008612	ENSBTAG00000015271
ENSBTAG00000003033	ENSBTAG00000021521
ENSBTAG00000017710	ENSBTAG00000000130
ENSBTAG00000021724	ENSBTAG00000007239
ENSBTAG00000009987	ENSBTAG00000017710
ENSBTAG00000017283	ENSBTAG00000012586
ENSBTAG00000020648	ENSBTAG00000001505
ENSBTAG00000020865	ENSBTAG00000021790
ENSBTAG00000040161	ENSBTAG00000007334
ENSBTAG00000012176	ENSBTAG00000010611
ENSBTAG00000004659	ENSBTAG00000005091
ENSBTAG00000018984	ENSBTAG00000021462
ENSBTAG00000014482	ENSBTAG00000027916
ENSBTAG00000002615	ENSBTAG00000012508
ENSBTAG00000012774	ENSBTAG00000019611
ENSBTAG00000003727	ENSBTAG00000001110
ENSBTAG00000014495	ENSBTAG00000008096
ENSBTAG00000013860	ENSBTAG00000046981
ENSBTAG00000010171	ENSBTAG00000005536
ENSBTAG00000002041	ENSBTAG00000032558
ENSBTAG00000010777	ENSBTAG00000009749
ENSBTAG00000002490	ENSBTAG00000017452
ENSBTAG00000005029	ENSBTAG00000004085
ENSBTAG00000018035	ENSBTAG00000039197
ENSBTAG00000000843	ENSBTAG00000015242
ENSBTAG00000047473	ENSBTAG00000020012
ENSBTAG00000000013	ENSBTAG00000010964
ENSBTAG00000012815	ENSBTAG00000011658
ENSBTAG00000012086	ENSBTAG00000013953
ENSBTAG00000010238	ENSBTAG00000017468
ENSBTAG00000002660	ENSBTAG00000011278
ENSBTAG00000019806	ENSBTAG00000030424
ENSBTAG00000038107	ENSBTAG00000010136
ENSBTAG00000018157	ENSBTAG00000013401
ENSBTAG00000018915	ENSBTAG00000011075
ENSBTAG00000032152	ENSBTAG00000018694
ENSBTAG00000008096	ENSBTAG00000001408
ENSBTAG00000020070	ENSBTAG00000005181
ENSBTAG00000013096	ENSBTAG00000013057
ENSBTAG00000018077	ENSBTAG00000044010
ENSBTAG00000007895	ENSBTAG00000017922
ENSBTAG00000003609	ENSBTAG00000012626
ENSBTAG00000039509	ENSBTAG00000011102
ENSBTAG00000010136	ENSBTAG00000017839
ENSBTAG00000015032	ENSBTAG00000006731
ENSBTAG00000013150	ENSBTAG00000016711
ENSBTAG00000005841	ENSBTAG00000040076
ENSBTAG00000020294	ENSBTAG00000016975
ENSBTAG00000011544	ENSBTAG00000007851
ENSBTAG00000016805	ENSBTAG00000024240
ENSBTAG00000014762	ENSBTAG00000021076
ENSBTAG00000009343	ENSBTAG00000004484
ENSBTAG00000019611	ENSBTAG00000012372
ENSBTAG00000021435	ENSBTAG00000021166
ENSBTAG00000010987	ENSBTAG00000007931
ENSBTAG00000020283	ENSBTAG00000002164
ENSBTAG00000030845	ENSBTAG00000003825
ENSBTAG00000008224	ENSBTAG00000000695
ENSBTAG00000014127	ENSBTAG00000007102
ENSBTAG00000011894	ENSBTAG00000005477
ENSBTAG00000013401	ENSBTAG00000001131
ENSBTAG00000019079	ENSBTAG00000004741
ENSBTAG00000008353	ENSBTAG00000027444
ENSBTAG00000007300	ENSBTAG00000020551
ENSBTAG00000009374	ENSBTAG00000017727
ENSBTAG00000008271	ENSBTAG00000018915
ENSBTAG00000002783	ENSBTAG00000016858
ENSBTAG00000009734	ENSBTAG00000010662
ENSBTAG00000007833	ENSBTAG00000009218
ENSBTAG00000006777	ENSBTAG00000005124
ENSBTAG00000002590	ENSBTAG00000040356
ENSBTAG00000013586	ENSBTAG00000010577
ENSBTAG00000006642	ENSBTAG00000030845
ENSBTAG00000007117	ENSBTAG00000013478
ENSBTAG00000009207	ENSBTAG00000016265
ENSBTAG00000003001	ENSBTAG00000014679
ENSBTAG00000003395	ENSBTAG00000010971
ENSBTAG00000016522	ENSBTAG00000015188
ENSBTAG00000011024	ENSBTAG00000009159
ENSBTAG00000027916	ENSBTAG00000007630
ENSBTAG00000016163	ENSBTAG00000020283
ENSBTAG00000014958	ENSBTAG00000001283
ENSBTAG00000014284	ENSBTAG00000007614
ENSBTAG00000012589	ENSBTAG00000003438
ENSBTAG00000023179	ENSBTAG00000011325
ENSBTAG00000003570	ENSBTAG00000005029
ENSBTAG00000005536	ENSBTAG00000015628
ENSBTAG00000044053	ENSBTAG00000011417
ENSBTAG00000011419	ENSBTAG00000014831
ENSBTAG00000030424	ENSBTAG00000040161
ENSBTAG00000035995	ENSBTAG00000011059
ENSBTAG00000005809	ENSBTAG00000021934
ENSBTAG00000021660	ENSBTAG00000021574
ENSBTAG00000008744	ENSBTAG00000002709
ENSBTAG00000011899	ENSBTAG00000014603
ENSBTAG00000015361	ENSBTAG00000006347
ENSBTAG00000002959	ENSBTAG00000022895
ENSBTAG00000002745	ENSBTAG00000031707
ENSBTAG00000016618	ENSBTAG00000000139
ENSBTAG00000006738	ENSBTAG00000044063
ENSBTAG00000003109	ENSBTAG00000019998
ENSBTAG00000020095	ENSBTAG00000018061
ENSBTAG00000002951	ENSBTAG00000018157
ENSBTAG00000007390	ENSBTAG00000006208
ENSBTAG00000001785	ENSBTAG00000002528
ENSBTAG00000001283	ENSBTAG00000005493
ENSBTAG00000009996	ENSBTAG00000013198
ENSBTAG00000018101	ENSBTAG00000014841
ENSBTAG00000017007	ENSBTAG00000009315
ENSBTAG00000034246	ENSBTAG00000014762
ENSBTAG00000021462	ENSBTAG00000009987
ENSBTAG00000012552	ENSBTAG00000013860
ENSBTAG00000016711	ENSBTAG00000020212
ENSBTAG00000008816	ENSBTAG00000001097
ENSBTAG00000012508	ENSBTAG00000037383
ENSBTAG00000017452	ENSBTAG00000020518
ENSBTAG00000024605	ENSBTAG00000004329
ENSBTAG00000048145	ENSBTAG00000002105
ENSBTAG00000005760	ENSBTAG00000016368
ENSBTAG00000000648	ENSBTAG00000047839
ENSBTAG00000026114	ENSBTAG00000008329
ENSBTAG00000000163	ENSBTAG00000015994
ENSBTAG00000018688	ENSBTAG00000019767
ENSBTAG00000025762	ENSBTAG00000037962
ENSBTAG00000047827	ENSBTAG00000000648
ENSBTAG00000004679	ENSBTAG00000023718
ENSBTAG00000006223	ENSBTAG00000015321
ENSBTAG00000017922	ENSBTAG00000007409
ENSBTAG00000019250	ENSBTAG00000014972
ENSBTAG00000018851	ENSBTAG00000020700
ENSBTAG00000010341	ENSBTAG00000007213
ENSBTAG00000017992	ENSBTAG00000015353
ENSBTAG00000009393	ENSBTAG00000001368
ENSBTAG00000019592	ENSBTAG00000005176
ENSBTAG00000015381	ENSBTAG00000015567
ENSBTAG00000021901	ENSBTAG00000022238
ENSBTAG00000014310	ENSBTAG00000020699
ENSBTAG00000019819	ENSBTAG00000013392
ENSBTAG00000002774	ENSBTAG00000012200
ENSBTAG00000021574	ENSBTAG00000005404
ENSBTAG00000004005	ENSBTAG00000019819
ENSBTAG00000019029	ENSBTAG00000007847
ENSBTAG00000015220	ENSBTAG00000001906
ENSBTAG00000016858	ENSBTAG00000017992
ENSBTAG00000047213	ENSBTAG00000004557
ENSBTAG00000000064	ENSBTAG00000015032
ENSBTAG00000008100	ENSBTAG00000001725
ENSBTAG00000021893	ENSBTAG00000024909
ENSBTAG00000006510	ENSBTAG00000015277
ENSBTAG00000003842	ENSBTAG00000005137
ENSBTAG00000011658	ENSBTAG00000005809
ENSBTAG00000014603	ENSBTAG00000009777
ENSBTAG00000004549	ENSBTAG00000004347
ENSBTAG00000000454	ENSBTAG00000030529
ENSBTAG00000037962	ENSBTAG00000006519
ENSBTAG00000006692	ENSBTAG00000020214
ENSBTAG00000013109	ENSBTAG00000010304
ENSBTAG00000011988	ENSBTAG00000019251
ENSBTAG00000011358	ENSBTAG00000004023
ENSBTAG00000020382	ENSBTAG00000021694
ENSBTAG00000012451	ENSBTAG00000012552
ENSBTAG00000002286	ENSBTAG00000031435
ENSBTAG00000014351	ENSBTAG00000038490
ENSBTAG00000001725	ENSBTAG00000001390
ENSBTAG00000007851	ENSBTAG00000011245
ENSBTAG00000001592	ENSBTAG00000015749
ENSBTAG00000018868	ENSBTAG00000001022
ENSBTAG00000027444	ENSBTAG00000006642
ENSBTAG00000014707	ENSBTAG00000005309
ENSBTAG00000020428	ENSBTAG00000005832
ENSBTAG00000010982	ENSBTAG00000016896
ENSBTAG00000022396	ENSBTAG00000014465
ENSBTAG00000027764	ENSBTAG00000034246
ENSBTAG00000007988	ENSBTAG00000014269
ENSBTAG00000011059	ENSBTAG00000020455
ENSBTAG00000012626	ENSBTAG00000016284
ENSBTAG00000030172	ENSBTAG00000003966
ENSBTAG00000004962	ENSBTAG00000005923
ENSBTAG00000009034	ENSBTAG00000017090
ENSBTAG00000006640	ENSBTAG00000009019
ENSBTAG00000016615	ENSBTAG00000046797
ENSBTAG00000006225	ENSBTAG00000011796
ENSBTAG00000019023	ENSBTAG00000016073
ENSBTAG00000003326	ENSBTAG00000009112
ENSBTAG00000018275	ENSBTAG00000021249
ENSBTAG00000021586	ENSBTAG00000011732
ENSBTAG00000015963	ENSBTAG00000039050
ENSBTAG00000002980	ENSBTAG00000011880
ENSBTAG00000018981	ENSBTAG00000020968
ENSBTAG00000007320	ENSBTAG00000001785
ENSBTAG00000021779	ENSBTAG00000033076
ENSBTAG00000017905	ENSBTAG00000009374
ENSBTAG00000020580	ENSBTAG00000019742
ENSBTAG00000003186	ENSBTAG00000013423
ENSBTAG00000021880	ENSBTAG00000016908
ENSBTAG00000005144	ENSBTAG00000032369
ENSBTAG00000015163	ENSBTAG00000009047
ENSBTAG00000001114	ENSBTAG00000006790
ENSBTAG00000020455	ENSBTAG00000008057
ENSBTAG00000005404	ENSBTAG00000019312
ENSBTAG00000008603	ENSBTAG00000047363
ENSBTAG00000013007	ENSBTAG00000006843
ENSBTAG00000018016	ENSBTAG00000013884
ENSBTAG00000039129	ENSBTAG00000039509
ENSBTAG00000022450	ENSBTAG00000012854
ENSBTAG00000000040	ENSBTAG00000014006
ENSBTAG00000020635	ENSBTAG00000011578
ENSBTAG00000003966	ENSBTAG00000010427
ENSBTAG00000031686	ENSBTAG00000016625
ENSBTAG00000004086	ENSBTAG00000015963
ENSBTAG00000001325	ENSBTAG00000006862
ENSBTAG00000011088	ENSBTAG00000020591
ENSBTAG00000002828	ENSBTAG00000020059
ENSBTAG00000018937	ENSBTAG00000002520
ENSBTAG00000017783	ENSBTAG00000018846
ENSBTAG00000018225	ENSBTAG00000015133
ENSBTAG00000011415	ENSBTAG00000014857
ENSBTAG00000014831	ENSBTAG00000010549
ENSBTAG00000002579	ENSBTAG00000012737
ENSBTAG00000012697	ENSBTAG00000014907
ENSBTAG00000007137	ENSBTAG00000035995
ENSBTAG00000015329	ENSBTAG00000000225
ENSBTAG00000020012	ENSBTAG00000011304
ENSBTAG00000046797	ENSBTAG00000000205
ENSBTAG00000005176	ENSBTAG00000018254
ENSBTAG00000000132	ENSBTAG00000018225
ENSBTAG00000047379	ENSBTAG00000012676
ENSBTAG00000013579	ENSBTAG00000038737
ENSBTAG00000010568	ENSBTAG00000000546
ENSBTAG00000019129	ENSBTAG00000014093
ENSBTAG00000017694	ENSBTAG00000021894
ENSBTAG00000026111	ENSBTAG00000022632
ENSBTAG00000013478	ENSBTAG00000002758
ENSBTAG00000010309	ENSBTAG00000016345
ENSBTAG00000011761	ENSBTAG00000019116
ENSBTAG00000006072	ENSBTAG00000010169
ENSBTAG00000006645	ENSBTAG00000007193
ENSBTAG00000012039	ENSBTAG00000019066
ENSBTAG00000021205	ENSBTAG00000048195
ENSBTAG00000013937	ENSBTAG00000003667
ENSBTAG00000008696	ENSBTAG00000000838
ENSBTAG00000010242	ENSBTAG00000021830
ENSBTAG00000016698	ENSBTAG00000015520
ENSBTAG00000023073	ENSBTAG00000025853
ENSBTAG00000020355	ENSBTAG00000007844
ENSBTAG00000009785	ENSBTAG00000017741
ENSBTAG00000023814	ENSBTAG00000018035
ENSBTAG00000008492	ENSBTAG00000026111
ENSBTAG00000038737	ENSBTAG00000000387
ENSBTAG00000006270	ENSBTAG00000001179
ENSBTAG00000012200	ENSBTAG00000031814
ENSBTAG00000019036	ENSBTAG00000018451
ENSBTAG00000018138	ENSBTAG00000006307
ENSBTAG00000036242	ENSBTAG00000016882
ENSBTAG00000011590	ENSBTAG00000015326
ENSBTAG00000018013	ENSBTAG00000000296
ENSBTAG00000002697	ENSBTAG00000016311
ENSBTAG00000021934	ENSBTAG00000011156
ENSBTAG00000000936	ENSBTAG00000034493
ENSBTAG00000009233	ENSBTAG00000014089
ENSBTAG00000016284	ENSBTAG00000005453
ENSBTAG00000048195	ENSBTAG00000027879
ENSBTAG00000011278	ENSBTAG00000000861
ENSBTAG00000016243	ENSBTAG00000016498
ENSBTAG00000016345	ENSBTAG00000008142
ENSBTAG00000016377	ENSBTAG00000009278
ENSBTAG00000006307	ENSBTAG00000013016
ENSBTAG00000035587	ENSBTAG00000008792
ENSBTAG00000008624	ENSBTAG00000005144
ENSBTAG00000011325	ENSBTAG00000013856
ENSBTAG00000046774	ENSBTAG00000019915
ENSBTAG00000001872	ENSBTAG00000009455
ENSBTAG00000006543	ENSBTAG00000020453
ENSBTAG00000017839	ENSBTAG00000013577
ENSBTAG00000030529	ENSBTAG00000016455
ENSBTAG00000015242	ENSBTAG00000018316
ENSBTAG00000037383	ENSBTAG00000012659
ENSBTAG00000009839	ENSBTAG00000017124
ENSBTAG00000022238	ENSBTAG00000000260
ENSBTAG00000001110	ENSBTAG00000016061
ENSBTAG00000039688	ENSBTAG00000014873
ENSBTAG00000040585	ENSBTAG00000019927
ENSBTAG00000021636	ENSBTAG00000010007
ENSBTAG00000009615	ENSBTAG00000037558
ENSBTAG00000005730	ENSBTAG00000016217
ENSBTAG00000020714	ENSBTAG00000010818
ENSBTAG00000009513	ENSBTAG00000007878
ENSBTAG00000001942	ENSBTAG00000006078
ENSBTAG00000037393	ENSBTAG00000006013
ENSBTAG00000008783	ENSBTAG00000001778
ENSBTAG00000007453	ENSBTAG00000033727
ENSBTAG00000003746	ENSBTAG00000006818
ENSBTAG00000017639	ENSBTAG00000004118
ENSBTAG00000034193	ENSBTAG00000045565
ENSBTAG00000021694	ENSBTAG00000017325
ENSBTAG00000007566	ENSBTAG00000014458
ENSBTAG00000046944	ENSBTAG00000015543
ENSBTAG00000014069	ENSBTAG00000011067
ENSBTAG00000000032	ENSBTAG00000021820
ENSBTAG00000014615	ENSBTAG00000005012
ENSBTAG00000001890	ENSBTAG00000014476
ENSBTAG00000001919	ENSBTAG00000011861
ENSBTAG00000021790	ENSBTAG00000001595
ENSBTAG00000017833	ENSBTAG00000004243
ENSBTAG00000037775	ENSBTAG00000016424
ENSBTAG00000038831	ENSBTAG00000008699
ENSBTAG00000020434	ENSBTAG00000003570
ENSBTAG00000006323	ENSBTAG00000000578
ENSBTAG00000006572	ENSBTAG00000030784
ENSBTAG00000016265	ENSBTAG00000006017
ENSBTAG00000008736	ENSBTAG00000000115
ENSBTAG00000018061	ENSBTAG00000004855
ENSBTAG00000000575	ENSBTAG00000021326
ENSBTAG00000019251	ENSBTAG00000007833
ENSBTAG00000007630	ENSBTAG00000002697
ENSBTAG00000008429	ENSBTAG00000003115
ENSBTAG00000014299	ENSBTAG00000020173
ENSBTAG00000020591	ENSBTAG00000017245
ENSBTAG00000011067	ENSBTAG00000030172
ENSBTAG00000015170	ENSBTAG00000025149
ENSBTAG00000024803	ENSBTAG00000026993
ENSBTAG00000018053	ENSBTAG00000012419
ENSBTAG00000000204	ENSBTAG00000008753
ENSBTAG00000017082	ENSBTAG00000001504
ENSBTAG00000039050	ENSBTAG00000009784
ENSBTAG00000025413	ENSBTAG00000019872
ENSBTAG00000005384	ENSBTAG00000012638
ENSBTAG00000010007	ENSBTAG00000009715
ENSBTAG00000004813	ENSBTAG00000001644
ENSBTAG00000004402	ENSBTAG00000031777
ENSBTAG00000021830	ENSBTAG00000010613
ENSBTAG00000017727	ENSBTAG00000005761
ENSBTAG00000020133	ENSBTAG00000011202
ENSBTAG00000000436	ENSBTAG00000008320
ENSBTAG00000018770	ENSBTAG00000020160
ENSBTAG00000007784	ENSBTAG00000011899
ENSBTAG00000008646	ENSBTAG00000019472
ENSBTAG00000018869	ENSBTAG00000012250
ENSBTAG00000008468	ENSBTAG00000014069
ENSBTAG00000016882	ENSBTAG00000017382
ENSBTAG00000014857	ENSBTAG00000000781
ENSBTAG00000011104	ENSBTAG00000009393
ENSBTAG00000008753	ENSBTAG00000000095
ENSBTAG00000021894	ENSBTAG00000000078
ENSBTAG00000031715	ENSBTAG00000013244
ENSBTAG00000011583	ENSBTAG00000000752
ENSBTAG00000012659	ENSBTAG00000007390
ENSBTAG00000008485	ENSBTAG00000025260
ENSBTAG00000009602	ENSBTAG00000003526
ENSBTAG00000021820	ENSBTAG00000005793
ENSBTAG00000020518	ENSBTAG00000010717
ENSBTAG00000013856	ENSBTAG00000040607
ENSBTAG00000010549	ENSBTAG00000007636
ENSBTAG00000047567	ENSBTAG00000003609
ENSBTAG00000040076	ENSBTAG00000009580
ENSBTAG00000004240	ENSBTAG00000002052
ENSBTAG00000038067	ENSBTAG00000012697
ENSBTAG00000021497	ENSBTAG00000019029
ENSBTAG00000004344	ENSBTAG00000019432
ENSBTAG00000013314	ENSBTAG00000018922
ENSBTAG00000004855	ENSBTAG00000019133
ENSBTAG00000012419	ENSBTAG00000002350
ENSBTAG00000003327	ENSBTAG00000002941
ENSBTAG00000014217	ENSBTAG00000047379
ENSBTAG00000016260	ENSBTAG00000005766
ENSBTAG00000011593	ENSBTAG00000046607
ENSBTAG00000008441	ENSBTAG00000011786
ENSBTAG00000040356	ENSBTAG00000014029
ENSBTAG00000016073	ENSBTAG00000018877
ENSBTAG00000008367	ENSBTAG00000010009
ENSBTAG00000011545	ENSBTAG00000009747
ENSBTAG00000011892	ENSBTAG00000008816
ENSBTAG00000005091	ENSBTAG00000011413
ENSBTAG00000000781	ENSBTAG00000008372
ENSBTAG00000045828	ENSBTAG00000019129
ENSBTAG00000014744	ENSBTAG00000003577
ENSBTAG00000025589	ENSBTAG00000008600
ENSBTAG00000001801	ENSBTAG00000002660
ENSBTAG00000030650	ENSBTAG00000016618
ENSBTAG00000010153	ENSBTAG00000006072
ENSBTAG00000019621	ENSBTAG00000001470
ENSBTAG00000016980	ENSBTAG00000020527
ENSBTAG00000001602	ENSBTAG00000027513
ENSBTAG00000010663	ENSBTAG00000020133
ENSBTAG00000007193	ENSBTAG00000019806
ENSBTAG00000018889	ENSBTAG00000044053
ENSBTAG00000011885	ENSBTAG00000020095
ENSBTAG00000021237	ENSBTAG00000003946
ENSBTAG00000008613	ENSBTAG00000007118
ENSBTAG00000012595	ENSBTAG00000032544
ENSBTAG00000020453	ENSBTAG00000005808
ENSBTAG00000019886	ENSBTAG00000009412
ENSBTAG00000008969	ENSBTAG00000018189
ENSBTAG00000010304	ENSBTAG00000008543
ENSBTAG00000006478	ENSBTAG00000015361
ENSBTAG00000002566	ENSBTAG00000005841
ENSBTAG00000016502	ENSBTAG00000011761
ENSBTAG00000009470	ENSBTAG00000003845
ENSBTAG00000025782	ENSBTAG00000031895
ENSBTAG00000016291	ENSBTAG00000006255
ENSBTAG00000000184	ENSBTAG00000031590
ENSBTAG00000047448	ENSBTAG00000004706
ENSBTAG00000002164	ENSBTAG00000013513
ENSBTAG00000005439	ENSBTAG00000017783
ENSBTAG00000006241	ENSBTAG00000014351
ENSBTAG00000001446	ENSBTAG00000002187
ENSBTAG00000006978	ENSBTAG00000037937
ENSBTAG00000011770	ENSBTAG00000007960
ENSBTAG00000006208	ENSBTAG00000009566
ENSBTAG00000005414	ENSBTAG00000011954
ENSBTAG00000004203	ENSBTAG00000006573
ENSBTAG00000000139	ENSBTAG00000048145
ENSBTAG00000011796	ENSBTAG00000004885
ENSBTAG00000009019	ENSBTAG00000003334
ENSBTAG00000004043	ENSBTAG00000038067
ENSBTAG00000013198	ENSBTAG00000003916
ENSBTAG00000019011	ENSBTAG00000004540
ENSBTAG00000020700	ENSBTAG00000011337
ENSBTAG00000007449	ENSBTAG00000008747
ENSBTAG00000011578	ENSBTAG00000008591
ENSBTAG00000015165	ENSBTAG00000005008
ENSBTAG00000020059	ENSBTAG00000019180
ENSBTAG00000007476	ENSBTAG00000017137
ENSBTAG00000005793	ENSBTAG00000008010
ENSBTAG00000018313	ENSBTAG00000016663
ENSBTAG00000023283	ENSBTAG00000023452
ENSBTAG00000006013	ENSBTAG00000019070
ENSBTAG00000010943	ENSBTAG00000011532
ENSBTAG00000005450	ENSBTAG00000007160
ENSBTAG00000024909	ENSBTAG00000018646
ENSBTAG00000000672	ENSBTAG00000006343
ENSBTAG00000010611	ENSBTAG00000006244
ENSBTAG00000012057	ENSBTAG00000030706
ENSBTAG00000018316	ENSBTAG00000023997
ENSBTAG00000005462	ENSBTAG00000003239
ENSBTAG00000001504	ENSBTAG00000026604
ENSBTAG00000010812	ENSBTAG00000008603
ENSBTAG00000004023	ENSBTAG00000034193
ENSBTAG00000045565	ENSBTAG00000013544
ENSBTAG00000012676	ENSBTAG00000003997
ENSBTAG00000018846	ENSBTAG00000014695
ENSBTAG00000003504	ENSBTAG00000016698
ENSBTAG00000014546	ENSBTAG00000006193
ENSBTAG00000009218	ENSBTAG00000007206
ENSBTAG00000014027	ENSBTAG00000011143
ENSBTAG00000000998	ENSBTAG00000000329
ENSBTAG00000013288	ENSBTAG00000004511
ENSBTAG00000010002	ENSBTAG00000032518
ENSBTAG00000004502	ENSBTAG00000012451
ENSBTAG00000021515	ENSBTAG00000026278
ENSBTAG00000013177	ENSBTAG00000026429
ENSBTAG00000010124	ENSBTAG00000000656
ENSBTAG00000020485	ENSBTAG00000006202
ENSBTAG00000004933	ENSBTAG00000014217
ENSBTAG00000046339	ENSBTAG00000014906
ENSBTAG00000014861	ENSBTAG00000011850
ENSBTAG00000012991	ENSBTAG00000002326
ENSBTAG00000019071	ENSBTAG00000012829
ENSBTAG00000039980	ENSBTAG00000021144
ENSBTAG00000021951	ENSBTAG00000001257
ENSBTAG00000015286	ENSBTAG00000004427
ENSBTAG00000016548	ENSBTAG00000012380
ENSBTAG00000000260	ENSBTAG00000016874
ENSBTAG00000016975	ENSBTAG00000032719
ENSBTAG00000001796	ENSBTAG00000009432
ENSBTAG00000020848	ENSBTAG00000019550
ENSBTAG00000017457	ENSBTAG00000015016
ENSBTAG00000007167	ENSBTAG00000001038
ENSBTAG00000016455	ENSBTAG00000019011
ENSBTAG00000017273	ENSBTAG00000010555
ENSBTAG00000006209	ENSBTAG00000016828
ENSBTAG00000015520	ENSBTAG00000005373
ENSBTAG00000018103	ENSBTAG00000033255
ENSBTAG00000017325	ENSBTAG00000014215
ENSBTAG00000033313	ENSBTAG00000004806
ENSBTAG00000017245	ENSBTAG00000010774
ENSBTAG00000009780	ENSBTAG00000025124
ENSBTAG00000000546	ENSBTAG00000033669
ENSBTAG00000008792	ENSBTAG00000047545
ENSBTAG00000007118	ENSBTAG00000000090
ENSBTAG00000004556	ENSBTAG00000020965
ENSBTAG00000011389	ENSBTAG00000011389
ENSBTAG00000014612	ENSBTAG00000002764
ENSBTAG00000033983	ENSBTAG00000015821
ENSBTAG00000034493	ENSBTAG00000007988
ENSBTAG00000002531	ENSBTAG00000012599
ENSBTAG00000009749	ENSBTAG00000005745
ENSBTAG00000025005	ENSBTAG00000005432
ENSBTAG00000009345	ENSBTAG00000023054
ENSBTAG00000047363	ENSBTAG00000015390
ENSBTAG00000011344	ENSBTAG00000021611
ENSBTAG00000038186	ENSBTAG00000008783
ENSBTAG00000046862	ENSBTAG00000033313
ENSBTAG00000007599	ENSBTAG00000018868
ENSBTAG00000015694	ENSBTAG00000001146
ENSBTAG00000008453	ENSBTAG00000016014
ENSBTAG00000015731	ENSBTAG00000006927
ENSBTAG00000002282	ENSBTAG00000017380
ENSBTAG00000011532	ENSBTAG00000019929
ENSBTAG00000008839	ENSBTAG00000027246
ENSBTAG00000038195	ENSBTAG00000009211
ENSBTAG00000001021	ENSBTAG00000010792
ENSBTAG00000011548	ENSBTAG00000011024
ENSBTAG00000016313	ENSBTAG00000014546
ENSBTAG00000012854	ENSBTAG00000005280
ENSBTAG00000017547	ENSBTAG00000013586
ENSBTAG00000012600	ENSBTAG00000015781
ENSBTAG00000047958	ENSBTAG00000000320
ENSBTAG00000011567	ENSBTAG00000012064
ENSBTAG00000002027	ENSBTAG00000027337
ENSBTAG00000014297	ENSBTAG00000007632
ENSBTAG00000021156	ENSBTAG00000009488
ENSBTAG00000014795	ENSBTAG00000019589
ENSBTAG00000009786	ENSBTAG00000020663
ENSBTAG00000032544	ENSBTAG00000006672
ENSBTAG00000013465	ENSBTAG00000002382
ENSBTAG00000033731	ENSBTAG00000021785
ENSBTAG00000020980	ENSBTAG00000005760
ENSBTAG00000011324	ENSBTAG00000013191
ENSBTAG00000048054	ENSBTAG00000009336
ENSBTAG00000019949	ENSBTAG00000010180
ENSBTAG00000019295	ENSBTAG00000025425
ENSBTAG00000014081	ENSBTAG00000013143
ENSBTAG00000006550	ENSBTAG00000000221
ENSBTAG00000019512	ENSBTAG00000017665
ENSBTAG00000015505	ENSBTAG00000012426
ENSBTAG00000016236	ENSBTAG00000030518
ENSBTAG00000010717	ENSBTAG00000013222
ENSBTAG00000005917	ENSBTAG00000020451
ENSBTAG00000008989	ENSBTAG00000016282
ENSBTAG00000005723	ENSBTAG00000030670
ENSBTAG00000006731	ENSBTAG00000022242
ENSBTAG00000003215	ENSBTAG00000014795
ENSBTAG00000019116	ENSBTAG00000011473
ENSBTAG00000003916	ENSBTAG00000039922
ENSBTAG00000013884	ENSBTAG00000030977
ENSBTAG00000018046	ENSBTAG00000001356
ENSBTAG00000047628	ENSBTAG00000015163
ENSBTAG00000001806	ENSBTAG00000009034
ENSBTAG00000007829	ENSBTAG00000031725
ENSBTAG00000020054	ENSBTAG00000005028
ENSBTAG00000020214	ENSBTAG00000033983
ENSBTAG00000017741	ENSBTAG00000002774
ENSBTAG00000009278	ENSBTAG00000004294
ENSBTAG00000000578	ENSBTAG00000019949
ENSBTAG00000015804	ENSBTAG00000004805
ENSBTAG00000019669	ENSBTAG00000015329
ENSBTAG00000044022	ENSBTAG00000008935
ENSBTAG00000047077	ENSBTAG00000004723
ENSBTAG00000024549	ENSBTAG00000011892
ENSBTAG00000013392	ENSBTAG00000005723
ENSBTAG00000022382	ENSBTAG00000021962
ENSBTAG00000021430	ENSBTAG00000039129
ENSBTAG00000039529	ENSBTAG00000020382
ENSBTAG00000004118	ENSBTAG00000008443
ENSBTAG00000031178	ENSBTAG00000008419
ENSBTAG00000002115	ENSBTAG00000016644
ENSBTAG00000004885	ENSBTAG00000018981
ENSBTAG00000008063	ENSBTAG00000025593
ENSBTAG00000005745	ENSBTAG00000008789
ENSBTAG00000011202	ENSBTAG00000003639
ENSBTAG00000013016	ENSBTAG00000019810
ENSBTAG00000019927	ENSBTAG00000004344
ENSBTAG00000032719	ENSBTAG00000026624
ENSBTAG00000010221	ENSBTAG00000013510
ENSBTAG00000020699	ENSBTAG00000017571
ENSBTAG00000002350	ENSBTAG00000031778
ENSBTAG00000011258	ENSBTAG00000023832
ENSBTAG00000001906	ENSBTAG00000037775
ENSBTAG00000013284	ENSBTAG00000002828
ENSBTAG00000002415	ENSBTAG00000002962
ENSBTAG00000004540	ENSBTAG00000010401
ENSBTAG00000009873	ENSBTAG00000012086
ENSBTAG00000006957	ENSBTAG00000031561
ENSBTAG00000010841	ENSBTAG00000026753
ENSBTAG00000019900	ENSBTAG00000019044
ENSBTAG00000005309	ENSBTAG00000014550
ENSBTAG00000010290	ENSBTAG00000002643
ENSBTAG00000004517	ENSBTAG00000014299
ENSBTAG00000014099	ENSBTAG00000016156
ENSBTAG00000021326	ENSBTAG00000015318
ENSBTAG00000006790	ENSBTAG00000007728
ENSBTAG00000014294	ENSBTAG00000005682
ENSBTAG00000025593	ENSBTAG00000040116
ENSBTAG00000017571	ENSBTAG00000016502
ENSBTAG00000021962	ENSBTAG00000010994
ENSBTAG00000021809	ENSBTAG00000015509
ENSBTAG00000011982	ENSBTAG00000010361
ENSBTAG00000010649	ENSBTAG00000004907
ENSBTAG00000006143	ENSBTAG00000014482
ENSBTAG00000010033	ENSBTAG00000014202
ENSBTAG00000011217	ENSBTAG00000019886
ENSBTAG00000006985	ENSBTAG00000013885
ENSBTAG00000019133	ENSBTAG00000044022
ENSBTAG00000013510	ENSBTAG00000006738
ENSBTAG00000031287	ENSBTAG00000014782
ENSBTAG00000018986	ENSBTAG00000003701
ENSBTAG00000025426	ENSBTAG00000020714
ENSBTAG00000002623	ENSBTAG00000015909
ENSBTAG00000005033	ENSBTAG00000010355
ENSBTAG00000007079	ENSBTAG00000014461
ENSBTAG00000010458	ENSBTAG00000010785
ENSBTAG00000016336	ENSBTAG00000000575
ENSBTAG00000005028	ENSBTAG00000009389
ENSBTAG00000006364	ENSBTAG00000021205
ENSBTAG00000018474	ENSBTAG00000015220
ENSBTAG00000008057	ENSBTAG00000020434
ENSBTAG00000046555	ENSBTAG00000007435
ENSBTAG00000009351	ENSBTAG00000039980
ENSBTAG00000008731	ENSBTAG00000001325
ENSBTAG00000019998	ENSBTAG00000009543
ENSBTAG00000000957	ENSBTAG00000008989
ENSBTAG00000018572	ENSBTAG00000000816
ENSBTAG00000010555	ENSBTAG00000018937
ENSBTAG00000006202	ENSBTAG00000030170
ENSBTAG00000017064	ENSBTAG00000013167
ENSBTAG00000009315	ENSBTAG00000006225
ENSBTAG00000032852	ENSBTAG00000000067
ENSBTAG00000043981	ENSBTAG00000046174
ENSBTAG00000023144	ENSBTAG00000002463
ENSBTAG00000013885	ENSBTAG00000020330
ENSBTAG00000020153	ENSBTAG00000015424
ENSBTAG00000013955	ENSBTAG00000012288
ENSBTAG00000046014	ENSBTAG00000003014
ENSBTAG00000009747	ENSBTAG00000000778
ENSBTAG00000011017	ENSBTAG00000006126
ENSBTAG00000002709	ENSBTAG00000009915
ENSBTAG00000016424	ENSBTAG00000010956
ENSBTAG00000004021	ENSBTAG00000025258
ENSBTAG00000004631	ENSBTAG00000011894
ENSBTAG00000000539	ENSBTAG00000008361
ENSBTAG00000014966	ENSBTAG00000014642
ENSBTAG00000016967	ENSBTAG00000003116
ENSBTAG00000000115	ENSBTAG00000006342
ENSBTAG00000004270	ENSBTAG00000015041
ENSBTAG00000013191	ENSBTAG00000002783
ENSBTAG00000000296	ENSBTAG00000011343
ENSBTAG00000000130	ENSBTAG00000030575
ENSBTAG00000004603	ENSBTAG00000009635
ENSBTAG00000022890	ENSBTAG00000007777
ENSBTAG00000027789	ENSBTAG00000004989
ENSBTAG00000044078	ENSBTAG00000006719
ENSBTAG00000017380	ENSBTAG00000010134
ENSBTAG00000015543	ENSBTAG00000014468
ENSBTAG00000021857	ENSBTAG00000002531
ENSBTAG00000003946	ENSBTAG00000013109
ENSBTAG00000004138	ENSBTAG00000025929
ENSBTAG00000007160	ENSBTAG00000009839
ENSBTAG00000010009	ENSBTAG00000046944
ENSBTAG00000007512	ENSBTAG00000046555
ENSBTAG00000046117	ENSBTAG00000007415
ENSBTAG00000018232	ENSBTAG00000018920
ENSBTAG00000031941	ENSBTAG00000008530
ENSBTAG00000002917	ENSBTAG00000014913
ENSBTAG00000008548	ENSBTAG00000012510
ENSBTAG00000017846	ENSBTAG00000011324
ENSBTAG00000015781	ENSBTAG00000020583
ENSBTAG00000005475	ENSBTAG00000009451
ENSBTAG00000006255	ENSBTAG00000014178
ENSBTAG00000010181	ENSBTAG00000018103
ENSBTAG00000011304	ENSBTAG00000021857
ENSBTAG00000008361	ENSBTAG00000009734
ENSBTAG00000016282	ENSBTAG00000021156
ENSBTAG00000009223	ENSBTAG00000019956
ENSBTAG00000025280	ENSBTAG00000009343
ENSBTAG00000008314	ENSBTAG00000002341
ENSBTAG00000032084	ENSBTAG00000000807
ENSBTAG00000016217	ENSBTAG00000009658
ENSBTAG00000000859	ENSBTAG00000006933
ENSBTAG00000012288	ENSBTAG00000030836
ENSBTAG00000017855	ENSBTAG00000015146
ENSBTAG00000039731	ENSBTAG00000047213
ENSBTAG00000003990	ENSBTAG00000038195
ENSBTAG00000019832	ENSBTAG00000000957
ENSBTAG00000001314	ENSBTAG00000018589
ENSBTAG00000030784	ENSBTAG00000019617
ENSBTAG00000004907	ENSBTAG00000001407
ENSBTAG00000003064	ENSBTAG00000010275
ENSBTAG00000010993	ENSBTAG00000046566
ENSBTAG00000044083	ENSBTAG00000014102
ENSBTAG00000010935	ENSBTAG00000006021
ENSBTAG00000012561	ENSBTAG00000032427
ENSBTAG00000016625	ENSBTAG00000003566
ENSBTAG00000009047	ENSBTAG00000011103
ENSBTAG00000026851	ENSBTAG00000009477
ENSBTAG00000011857	ENSBTAG00000016297
ENSBTAG00000001805	ENSBTAG00000022920
ENSBTAG00000040131	ENSBTAG00000000672
ENSBTAG00000005766	ENSBTAG00000016103
ENSBTAG00000011204	ENSBTAG00000005033
ENSBTAG00000000312	ENSBTAG00000005631
ENSBTAG00000038710	ENSBTAG00000006670
ENSBTAG00000001124	ENSBTAG00000002238
ENSBTAG00000021609	ENSBTAG00000006718
ENSBTAG00000008372	ENSBTAG00000000289
ENSBTAG00000003952	ENSBTAG00000008578
ENSBTAG00000001332	ENSBTAG00000013988
ENSBTAG00000001414	ENSBTAG00000001420
ENSBTAG00000032024	ENSBTAG00000014057
ENSBTAG00000003489	ENSBTAG00000020350
ENSBTAG00000018897	ENSBTAG00000006478
ENSBTAG00000020451	ENSBTAG00000010221
ENSBTAG00000032137	ENSBTAG00000012385
ENSBTAG00000000320	ENSBTAG00000022150
ENSBTAG00000016939	ENSBTAG00000008492
ENSBTAG00000019321	ENSBTAG00000011623
ENSBTAG00000019044	ENSBTAG00000031267
ENSBTAG00000000090	ENSBTAG00000003528
ENSBTAG00000000347	ENSBTAG00000003186
ENSBTAG00000004954	ENSBTAG00000014694
ENSBTAG00000008728	ENSBTAG00000011754
ENSBTAG00000006160	ENSBTAG00000002048
ENSBTAG00000014537	ENSBTAG00000015209
ENSBTAG00000017382	ENSBTAG00000018232
ENSBTAG00000005492	ENSBTAG00000006481
ENSBTAG00000019066	ENSBTAG00000026248
ENSBTAG00000005137	ENSBTAG00000019639
ENSBTAG00000009412	ENSBTAG00000013045
ENSBTAG00000039090	ENSBTAG00000019669
ENSBTAG00000007206	ENSBTAG00000003727
ENSBTAG00000001595	ENSBTAG00000021107
ENSBTAG00000021696	ENSBTAG00000000539
ENSBTAG00000013044	ENSBTAG00000006099
ENSBTAG00000020933	ENSBTAG00000009786
ENSBTAG00000001408	ENSBTAG00000021071
ENSBTAG00000045980	ENSBTAG00000020958
ENSBTAG00000014089	ENSBTAG00000000218
ENSBTAG00000016896	ENSBTAG00000004745
ENSBTAG00000004085	ENSBTAG00000018013
ENSBTAG00000020815	ENSBTAG00000012057
ENSBTAG00000004139	ENSBTAG00000000081
ENSBTAG00000011861	ENSBTAG00000022681
ENSBTAG00000023736	ENSBTAG00000010124
ENSBTAG00000008008	ENSBTAG00000038186
ENSBTAG00000016374	ENSBTAG00000010649
ENSBTAG00000004806	ENSBTAG00000022450
ENSBTAG00000005138	ENSBTAG00000001602
ENSBTAG00000015976	ENSBTAG00000013905
ENSBTAG00000000993	ENSBTAG00000017268
ENSBTAG00000006818	ENSBTAG00000031569
ENSBTAG00000000202	ENSBTAG00000020629
ENSBTAG00000023452	ENSBTAG00000000621
ENSBTAG00000003115	ENSBTAG00000015258
ENSBTAG00000000959	ENSBTAG00000031750
ENSBTAG00000037558	ENSBTAG00000019020
ENSBTAG00000000695	ENSBTAG00000017718
ENSBTAG00000011614	ENSBTAG00000012039
ENSBTAG00000019956	ENSBTAG00000006525
ENSBTAG00000003882	ENSBTAG00000018598
ENSBTAG00000020551	ENSBTAG00000011437
ENSBTAG00000000095	ENSBTAG00000016253
ENSBTAG00000020762	ENSBTAG00000031231
ENSBTAG00000015994	ENSBTAG00000022396
ENSBTAG00000022715	ENSBTAG00000000162
ENSBTAG00000006099	ENSBTAG00000006848
ENSBTAG00000014411	ENSBTAG00000034995
ENSBTAG00000005761	ENSBTAG00000001585
ENSBTAG00000008591	ENSBTAG00000045647
ENSBTAG00000014373	ENSBTAG00000002495
ENSBTAG00000011473	ENSBTAG00000007117
ENSBTAG00000003438	ENSBTAG00000009351
ENSBTAG00000005116	ENSBTAG00000015562
ENSBTAG00000001987	ENSBTAG00000004225
ENSBTAG00000030434	ENSBTAG00000021237
ENSBTAG00000008320	ENSBTAG00000001124
ENSBTAG00000016609	ENSBTAG00000046774
ENSBTAG00000045808	ENSBTAG00000006428
ENSBTAG00000004115	ENSBTAG00000039326
ENSBTAG00000026624	ENSBTAG00000012745
ENSBTAG00000011880	ENSBTAG00000014024
ENSBTAG00000007061	ENSBTAG00000009615
ENSBTAG00000020066	ENSBTAG00000008744
ENSBTAG00000007872	ENSBTAG00000025589
ENSBTAG00000003469	ENSBTAG00000047214
ENSBTAG00000002292	ENSBTAG00000039888
ENSBTAG00000016061	ENSBTAG00000003415
ENSBTAG00000014090	ENSBTAG00000021951
ENSBTAG00000004427	ENSBTAG00000004066
ENSBTAG00000011905	ENSBTAG00000003857
ENSBTAG00000004805	ENSBTAG00000019321
ENSBTAG00000015562	ENSBTAG00000003001
ENSBTAG00000002520	ENSBTAG00000039582
ENSBTAG00000006342	ENSBTAG00000007428
ENSBTAG00000021935	ENSBTAG00000009087
ENSBTAG00000007442	ENSBTAG00000020311
ENSBTAG00000006754	ENSBTAG00000014081
ENSBTAG00000001932	ENSBTAG00000000184
ENSBTAG00000015753	ENSBTAG00000007617
ENSBTAG00000021071	ENSBTAG00000008063
ENSBTAG00000017569	ENSBTAG00000008728
ENSBTAG00000006126	ENSBTAG00000009156
ENSBTAG00000009475	ENSBTAG00000003326
ENSBTAG00000020583	ENSBTAG00000006170
ENSBTAG00000019434	ENSBTAG00000004933
ENSBTAG00000000140	ENSBTAG00000024549
ENSBTAG00000012372	ENSBTAG00000003109
ENSBTAG00000031569	ENSBTAG00000017850
ENSBTAG00000019515	ENSBTAG00000009214
ENSBTAG00000001673	ENSBTAG00000017082
ENSBTAG00000003526	ENSBTAG00000017085
ENSBTAG00000013023	ENSBTAG00000015086
ENSBTAG00000045500	ENSBTAG00000032152
ENSBTAG00000010351	ENSBTAG00000021779
ENSBTAG00000005733	ENSBTAG00000007449
ENSBTAG00000017123	ENSBTAG00000004021
ENSBTAG00000018286	ENSBTAG00000014495
ENSBTAG00000016253	ENSBTAG00000012774
ENSBTAG00000003770	ENSBTAG00000026114
ENSBTAG00000009635	ENSBTAG00000018869
ENSBTAG00000006539	ENSBTAG00000017064
ENSBTAG00000019685	ENSBTAG00000015482
ENSBTAG00000001656	ENSBTAG00000024803
ENSBTAG00000014700	ENSBTAG00000020301
ENSBTAG00000001949	ENSBTAG00000004262
ENSBTAG00000002724	ENSBTAG00000006985
ENSBTAG00000021144	ENSBTAG00000014253
ENSBTAG00000012432	ENSBTAG00000032137
ENSBTAG00000001683	ENSBTAG00000018572
ENSBTAG00000000078	ENSBTAG00000008429
ENSBTAG00000002052	ENSBTAG00000018773
ENSBTAG00000003443	ENSBTAG00000019069
ENSBTAG00000039711	ENSBTAG00000015976
ENSBTAG00000030706	ENSBTAG00000038604
ENSBTAG00000016776	ENSBTAG00000031385
ENSBTAG00000000536	ENSBTAG00000011971
ENSBTAG00000017090	ENSBTAG00000010232
ENSBTAG00000015258	ENSBTAG00000003746
ENSBTAG00000020212	ENSBTAG00000007780
ENSBTAG00000020350	ENSBTAG00000012228
ENSBTAG00000011934	ENSBTAG00000013023
ENSBTAG00000019242	ENSBTAG00000009838
ENSBTAG00000009711	ENSBTAG00000001085
ENSBTAG00000047605	ENSBTAG00000019966
ENSBTAG00000007780	ENSBTAG00000004463
ENSBTAG00000020813	ENSBTAG00000000589
ENSBTAG00000014375	ENSBTAG00000034238
ENSBTAG00000000771	ENSBTAG00000021809
ENSBTAG00000006654	ENSBTAG00000033186
ENSBTAG00000014825	ENSBTAG00000003151
ENSBTAG00000003528	ENSBTAG00000013859
ENSBTAG00000004557	ENSBTAG00000005138
ENSBTAG00000006343	ENSBTAG00000000202
ENSBTAG00000016268	ENSBTAG00000003557
ENSBTAG00000017468	ENSBTAG00000019071
ENSBTAG00000018735	ENSBTAG00000014390
ENSBTAG00000046092	ENSBTAG00000023814
ENSBTAG00000014824	ENSBTAG00000010290
ENSBTAG00000016598	ENSBTAG00000005443
ENSBTAG00000011291	ENSBTAG00000036242
ENSBTAG00000012858	ENSBTAG00000043964
ENSBTAG00000009451	ENSBTAG00000010644
ENSBTAG00000003436	ENSBTAG00000009475
ENSBTAG00000015354	ENSBTAG00000002724
ENSBTAG00000005854	ENSBTAG00000001801
ENSBTAG00000019939	ENSBTAG00000014375
ENSBTAG00000013029	ENSBTAG00000015341
ENSBTAG00000030587	ENSBTAG00000005773
ENSBTAG00000000831	ENSBTAG00000012972
ENSBTAG00000013577	ENSBTAG00000016776
ENSBTAG00000017665	ENSBTAG00000030974
ENSBTAG00000031572	ENSBTAG00000008967
ENSBTAG00000007384	ENSBTAG00000019039
ENSBTAG00000003334	ENSBTAG00000012537
ENSBTAG00000013303	ENSBTAG00000047699
ENSBTAG00000005371	ENSBTAG00000000064
ENSBTAG00000020642	ENSBTAG00000046862
ENSBTAG00000001161	ENSBTAG00000015739
ENSBTAG00000000329	ENSBTAG00000047448
ENSBTAG00000000049	ENSBTAG00000016243
ENSBTAG00000008597	ENSBTAG00000016336
ENSBTAG00000037634	ENSBTAG00000019295
ENSBTAG00000007714	ENSBTAG00000014558
ENSBTAG00000003396	ENSBTAG00000012595
ENSBTAG00000026234	ENSBTAG00000018688
ENSBTAG00000020654	ENSBTAG00000003712
ENSBTAG00000003708	ENSBTAG00000018175
ENSBTAG00000002920	ENSBTAG00000015255
ENSBTAG00000005832	ENSBTAG00000013671
ENSBTAG00000009958	ENSBTAG00000023144
ENSBTAG00000012599	ENSBTAG00000007683
ENSBTAG00000016640	ENSBTAG00000008612
ENSBTAG00000001131	ENSBTAG00000008468
ENSBTAG00000008169	ENSBTAG00000006836
ENSBTAG00000006525	ENSBTAG00000031800
ENSBTAG00000007844	ENSBTAG00000008188
ENSBTAG00000018877	ENSBTAG00000012858
ENSBTAG00000010534	ENSBTAG00000014447
ENSBTAG00000024443	ENSBTAG00000017451
ENSBTAG00000008390	ENSBTAG00000009289
ENSBTAG00000011971	ENSBTAG00000013855
ENSBTAG00000009372	ENSBTAG00000004322
ENSBTAG00000045779	ENSBTAG00000014294
ENSBTAG00000006965	ENSBTAG00000026234
ENSBTAG00000025898	ENSBTAG00000003396
ENSBTAG00000046481	ENSBTAG00000003064
ENSBTAG00000014396	ENSBTAG00000017404
ENSBTAG00000004329	ENSBTAG00000016328
ENSBTAG00000005100	ENSBTAG00000017833
ENSBTAG00000031778	ENSBTAG00000025809
ENSBTAG00000008543	ENSBTAG00000030255
ENSBTAG00000044063	ENSBTAG00000006411
ENSBTAG00000006886	ENSBTAG00000003245
ENSBTAG00000015821	ENSBTAG00000003947
ENSBTAG00000006347	ENSBTAG00000018496
ENSBTAG00000002591	ENSBTAG00000003469
ENSBTAG00000038251	ENSBTAG00000014002
ENSBTAG00000000221	ENSBTAG00000009923
ENSBTAG00000001632	ENSBTAG00000003762
ENSBTAG00000014262	ENSBTAG00000023601
ENSBTAG00000002082	ENSBTAG00000002956
ENSBTAG00000012741	ENSBTAG00000025005
ENSBTAG00000002458	ENSBTAG00000014794
ENSBTAG00000039466	ENSBTAG00000015678
ENSBTAG00000015177	ENSBTAG00000001919
ENSBTAG00000026676	ENSBTAG00000021999
ENSBTAG00000026604	ENSBTAG00000006744
ENSBTAG00000001085	ENSBTAG00000008008
ENSBTAG00000039618	ENSBTAG00000038042
ENSBTAG00000006082	ENSBTAG00000004727
ENSBTAG00000019966	ENSBTAG00000021002
ENSBTAG00000011413	ENSBTAG00000017666
ENSBTAG00000001154	ENSBTAG00000037634
ENSBTAG00000009941	ENSBTAG00000012725
ENSBTAG00000015896	ENSBTAG00000044100
ENSBTAG00000027513	ENSBTAG00000048107
ENSBTAG00000005043	ENSBTAG00000002591
ENSBTAG00000020447	ENSBTAG00000012968
ENSBTAG00000004871	ENSBTAG00000016251
ENSBTAG00000011623	ENSBTAG00000019515
ENSBTAG00000013048	ENSBTAG00000001932
ENSBTAG00000020850	ENSBTAG00000015165
ENSBTAG00000002238	ENSBTAG00000007829
ENSBTAG00000034238	ENSBTAG00000011981
ENSBTAG00000006157	ENSBTAG00000013029
ENSBTAG00000015490	ENSBTAG00000020580
ENSBTAG00000021514	ENSBTAG00000044082
ENSBTAG00000006927	ENSBTAG00000005211
ENSBTAG00000031012	ENSBTAG00000039662
ENSBTAG00000017845	ENSBTAG00000019036
ENSBTAG00000033076	ENSBTAG00000017265
ENSBTAG00000000218	ENSBTAG00000016377
ENSBTAG00000006491	ENSBTAG00000010805
ENSBTAG00000016309	ENSBTAG00000002292
ENSBTAG00000018922	ENSBTAG00000022006
ENSBTAG00000025274	ENSBTAG00000020605
ENSBTAG00000012003	ENSBTAG00000014983
ENSBTAG00000007102	ENSBTAG00000019716
ENSBTAG00000005012	ENSBTAG00000018768
ENSBTAG00000002105	ENSBTAG00000020270
ENSBTAG00000016206	ENSBTAG00000000140
ENSBTAG00000014484	ENSBTAG00000000670
ENSBTAG00000014468	ENSBTAG00000009305
ENSBTAG00000005062	ENSBTAG00000000671
ENSBTAG00000045658	ENSBTAG00000011990
ENSBTAG00000007239	ENSBTAG00000014150
ENSBTAG00000002477	ENSBTAG00000007353
ENSBTAG00000014024	ENSBTAG00000018016
ENSBTAG00000039932	ENSBTAG00000002738
ENSBTAG00000009459	ENSBTAG00000008441
ENSBTAG00000032503	ENSBTAG00000021036
ENSBTAG00000001941	ENSBTAG00000014700
ENSBTAG00000013759	ENSBTAG00000005448
ENSBTAG00000021263	ENSBTAG00000006143
ENSBTAG00000006193	ENSBTAG00000038477
ENSBTAG00000008789	ENSBTAG00000020266
ENSBTAG00000012586	ENSBTAG00000003362
ENSBTAG00000004484	ENSBTAG00000001656
ENSBTAG00000039326	ENSBTAG00000032808
ENSBTAG00000014106	ENSBTAG00000000013
ENSBTAG00000026779	ENSBTAG00000018178
ENSBTAG00000014858	ENSBTAG00000013298
ENSBTAG00000046786	ENSBTAG00000020661
ENSBTAG00000003116	ENSBTAG00000007961
ENSBTAG00000009020	ENSBTAG00000021474
ENSBTAG00000014447	ENSBTAG00000016824
ENSBTAG00000047822	ENSBTAG00000007016
ENSBTAG00000008004	ENSBTAG00000006754
ENSBTAG00000003801	ENSBTAG00000001181
ENSBTAG00000019568	ENSBTAG00000001570
ENSBTAG00000008682	ENSBTAG00000012550
ENSBTAG00000005827	ENSBTAG00000007512
ENSBTAG00000003503	ENSBTAG00000013314
ENSBTAG00000039504	ENSBTAG00000015381
ENSBTAG00000037989	ENSBTAG00000015648
ENSBTAG00000025149	ENSBTAG00000002286
ENSBTAG00000020968	ENSBTAG00000000586
ENSBTAG00000018000	ENSBTAG00000001694
ENSBTAG00000047956	ENSBTAG00000025443
ENSBTAG00000019121	ENSBTAG00000001394
ENSBTAG00000003068	ENSBTAG00000031834
ENSBTAG00000000670	ENSBTAG00000004258
ENSBTAG00000004281	ENSBTAG00000011590
ENSBTAG00000022632	ENSBTAG00000017751
ENSBTAG00000020305	ENSBTAG00000010663
ENSBTAG00000016943	ENSBTAG00000037393
ENSBTAG00000005373	ENSBTAG00000000026
ENSBTAG00000004196	ENSBTAG00000015683
ENSBTAG00000020605	ENSBTAG00000016326
ENSBTAG00000004037	ENSBTAG00000007384
ENSBTAG00000016156	ENSBTAG00000015334
ENSBTAG00000000930	ENSBTAG00000003339
ENSBTAG00000000684	ENSBTAG00000035379
ENSBTAG00000017218	ENSBTAG00000008649
ENSBTAG00000006752	ENSBTAG00000017611
ENSBTAG00000030518	ENSBTAG00000037377
ENSBTAG00000011507	ENSBTAG00000014484
ENSBTAG00000002293	ENSBTAG00000019345
ENSBTAG00000010665	ENSBTAG00000000032
ENSBTAG00000008895	ENSBTAG00000020762
ENSBTAG00000008167	ENSBTAG00000007080
ENSBTAG00000003602	ENSBTAG00000011339
ENSBTAG00000003045	ENSBTAG00000004922
ENSBTAG00000012052	ENSBTAG00000002690
ENSBTAG00000002846	ENSBTAG00000021901
ENSBTAG00000005124	ENSBTAG00000001666
ENSBTAG00000016663	ENSBTAG00000022890
ENSBTAG00000008967	ENSBTAG00000012416
ENSBTAG00000020468	ENSBTAG00000007430
ENSBTAG00000007614	ENSBTAG00000010254
ENSBTAG00000016085	ENSBTAG00000001796
ENSBTAG00000002714	ENSBTAG00000002041
ENSBTAG00000017490	ENSBTAG00000006539
ENSBTAG00000047988	ENSBTAG00000004379
ENSBTAG00000036016	ENSBTAG00000015694
ENSBTAG00000019872	ENSBTAG00000047225
ENSBTAG00000005808	ENSBTAG00000015888
ENSBTAG00000009566	ENSBTAG00000004747
ENSBTAG00000010403	ENSBTAG00000022382
ENSBTAG00000003997	ENSBTAG00000002827
ENSBTAG00000019929	ENSBTAG00000040569
ENSBTAG00000011337	ENSBTAG00000006209
ENSBTAG00000012261	ENSBTAG00000013308
ENSBTAG00000008729	ENSBTAG00000019954
ENSBTAG00000003566	ENSBTAG00000032260
ENSBTAG00000000634	ENSBTAG00000026637
ENSBTAG00000010355	ENSBTAG00000018897
ENSBTAG00000009336	ENSBTAG00000022509
ENSBTAG00000005067	ENSBTAG00000002727
ENSBTAG00000001233	ENSBTAG00000006156
ENSBTAG00000036262	ENSBTAG00000002566
ENSBTAG00000019550	ENSBTAG00000018577
ENSBTAG00000003845	ENSBTAG00000006751
ENSBTAG00000031473	ENSBTAG00000020090
ENSBTAG00000013343	ENSBTAG00000008401
ENSBTAG00000001497	ENSBTAG00000008341
ENSBTAG00000014947	ENSBTAG00000000875
ENSBTAG00000031886	ENSBTAG00000010001
ENSBTAG00000000181	ENSBTAG00000010106
ENSBTAG00000002554	ENSBTAG00000002554
ENSBTAG00000021713	ENSBTAG00000018240
ENSBTAG00000014461	ENSBTAG00000020414
ENSBTAG00000004104	ENSBTAG00000012873
ENSBTAG00000009715	ENSBTAG00000020066
ENSBTAG00000038131	ENSBTAG00000003690
ENSBTAG00000018274	ENSBTAG00000023283
ENSBTAG00000023795	ENSBTAG00000046229
ENSBTAG00000013298	ENSBTAG00000018711
ENSBTAG00000018880	ENSBTAG00000014772
ENSBTAG00000017310	ENSBTAG00000001887
ENSBTAG00000004742	ENSBTAG00000015612
ENSBTAG00000020780	ENSBTAG00000039090
ENSBTAG00000010273	ENSBTAG00000012723
ENSBTAG00000023997	ENSBTAG00000012881
ENSBTAG00000001861	ENSBTAG00000004851
ENSBTAG00000007256	ENSBTAG00000003556
ENSBTAG00000010913	ENSBTAG00000020815
ENSBTAG00000016635	ENSBTAG00000013042
ENSBTAG00000020301	ENSBTAG00000006550
ENSBTAG00000009109	ENSBTAG00000038235
ENSBTAG00000002823	ENSBTAG00000039932
ENSBTAG00000000225	ENSBTAG00000002561
ENSBTAG00000020764	ENSBTAG00000037996
ENSBTAG00000008151	ENSBTAG00000019780
ENSBTAG00000007335	ENSBTAG00000014764
ENSBTAG00000020965	ENSBTAG00000016313
ENSBTAG00000000065	ENSBTAG00000025391
ENSBTAG00000048253	ENSBTAG00000011217
ENSBTAG00000013544	ENSBTAG00000008004
ENSBTAG00000014269	ENSBTAG00000009805
ENSBTAG00000005757	ENSBTAG00000006714
ENSBTAG00000015255	ENSBTAG00000006049
ENSBTAG00000038235	ENSBTAG00000036262
ENSBTAG00000007130	ENSBTAG00000034396
ENSBTAG00000000484	ENSBTAG00000011507
ENSBTAG00000046375	ENSBTAG00000031012
ENSBTAG00000014913	ENSBTAG00000014579
ENSBTAG00000017095	ENSBTAG00000021287
ENSBTAG00000009378	ENSBTAG00000043951
ENSBTAG00000015677	ENSBTAG00000009072
ENSBTAG00000014153	ENSBTAG00000030335
ENSBTAG00000025425	ENSBTAG00000046339
ENSBTAG00000020831	ENSBTAG00000005854
ENSBTAG00000032260	ENSBTAG00000009020
ENSBTAG00000019182	ENSBTAG00000012787
ENSBTAG00000001038	ENSBTAG00000006088
ENSBTAG00000006862	ENSBTAG00000044099
ENSBTAG00000031441	ENSBTAG00000015104
ENSBTAG00000006592	ENSBTAG00000018053
ENSBTAG00000001576	ENSBTAG00000013573
ENSBTAG00000030255	ENSBTAG00000001485
ENSBTAG00000007415	ENSBTAG00000000930
ENSBTAG00000011969	ENSBTAG00000004502
ENSBTAG00000003907	ENSBTAG00000017694
ENSBTAG00000006088	ENSBTAG00000009213
ENSBTAG00000020281	ENSBTAG00000005246
ENSBTAG00000017275	ENSBTAG00000015007
ENSBTAG00000013592	ENSBTAG00000009768
ENSBTAG00000001485	ENSBTAG00000017490
ENSBTAG00000004173	ENSBTAG00000007606
ENSBTAG00000009362	ENSBTAG00000002823
ENSBTAG00000021976	ENSBTAG00000021506
ENSBTAG00000003690	ENSBTAG00000012703
ENSBTAG00000015066	ENSBTAG00000002282
ENSBTAG00000015277	ENSBTAG00000003160
ENSBTAG00000044082	ENSBTAG00000007791
ENSBTAG00000010069	ENSBTAG00000039954
ENSBTAG00000027201	ENSBTAG00000012991
ENSBTAG00000001462	ENSBTAG00000000415
ENSBTAG00000000816	ENSBTAG00000025213
ENSBTAG00000004939	ENSBTAG00000038992
ENSBTAG00000006378	ENSBTAG00000010832
ENSBTAG00000003557	ENSBTAG00000003849
ENSBTAG00000001573	ENSBTAG00000013175
ENSBTAG00000045785	ENSBTAG00000048122
ENSBTAG00000047412	ENSBTAG00000007152
ENSBTAG00000021275	ENSBTAG00000003072
ENSBTAG00000010843	ENSBTAG00000047605
ENSBTAG00000004851	ENSBTAG00000012922
ENSBTAG00000022509	ENSBTAG00000030587
ENSBTAG00000012185	ENSBTAG00000006282
ENSBTAG00000016762	ENSBTAG00000002908
ENSBTAG00000012250	ENSBTAG00000004660
ENSBTAG00000047064	ENSBTAG00000020554
ENSBTAG00000047744	ENSBTAG00000014091
ENSBTAG00000018739	ENSBTAG00000025762
ENSBTAG00000012922	ENSBTAG00000009854
ENSBTAG00000005432	ENSBTAG00000039601
ENSBTAG00000021287	ENSBTAG00000034918
ENSBTAG00000027348	ENSBTAG00000002125
ENSBTAG00000005015	ENSBTAG00000013869
ENSBTAG00000007016	ENSBTAG00000011204
ENSBTAG00000009924	ENSBTAG00000011396
ENSBTAG00000024199	ENSBTAG00000016635
ENSBTAG00000012537	ENSBTAG00000019437
ENSBTAG00000025822	ENSBTAG00000046320
ENSBTAG00000013162	ENSBTAG00000034323
ENSBTAG00000021135	ENSBTAG00000039618
ENSBTAG00000015188	ENSBTAG00000000333
ENSBTAG00000015866	ENSBTAG00000013790
ENSBTAG00000018424	ENSBTAG00000009394
ENSBTAG00000037981	ENSBTAG00000001843
ENSBTAG00000010846	ENSBTAG00000002755
ENSBTAG00000006156	ENSBTAG00000031715
ENSBTAG00000014782	ENSBTAG00000003218
ENSBTAG00000014215	ENSBTAG00000012482
ENSBTAG00000015829	ENSBTAG00000020764
ENSBTAG00000021107	ENSBTAG00000000687
ENSBTAG00000006428	ENSBTAG00000015077
ENSBTAG00000017868	ENSBTAG00000031886
ENSBTAG00000002561	ENSBTAG00000030225
ENSBTAG00000018920	ENSBTAG00000014807
ENSBTAG00000018768	ENSBTAG00000031178
ENSBTAG00000005682	ENSBTAG00000014665
ENSBTAG00000013302	ENSBTAG00000016470
ENSBTAG00000008935	ENSBTAG00000020305
ENSBTAG00000001156	ENSBTAG00000015727
ENSBTAG00000002187	ENSBTAG00000010191
ENSBTAG00000018824	ENSBTAG00000030337
ENSBTAG00000013452	ENSBTAG00000013678
ENSBTAG00000015567	ENSBTAG00000005517
ENSBTAG00000013513	ENSBTAG00000010547
ENSBTAG00000008401	ENSBTAG00000017074
ENSBTAG00000001186	ENSBTAG00000013925
ENSBTAG00000000529	ENSBTAG00000008259
ENSBTAG00000012265	ENSBTAG00000019738
ENSBTAG00000019636	ENSBTAG00000047059
ENSBTAG00000010838	ENSBTAG00000025898
ENSBTAG00000007632	ENSBTAG00000004196
ENSBTAG00000006021	ENSBTAG00000005316
ENSBTAG00000034323	ENSBTAG00000017242
ENSBTAG00000011140	ENSBTAG00000007256
ENSBTAG00000006034	ENSBTAG00000014262
ENSBTAG00000021351	ENSBTAG00000005039
ENSBTAG00000015909	ENSBTAG00000014784
ENSBTAG00000021304	ENSBTAG00000047628
ENSBTAG00000012094	ENSBTAG00000017855
ENSBTAG00000010427	ENSBTAG00000001510
ENSBTAG00000004291	ENSBTAG00000014824
ENSBTAG00000020964	ENSBTAG00000001949
ENSBTAG00000010193	ENSBTAG00000003484
ENSBTAG00000003063	ENSBTAG00000006784
ENSBTAG00000005379	ENSBTAG00000026779
ENSBTAG00000020536	ENSBTAG00000018706
ENSBTAG00000010134	ENSBTAG00000011661
ENSBTAG00000014016	ENSBTAG00000010234
ENSBTAG00000004262	ENSBTAG00000013483
ENSBTAG00000005493	ENSBTAG00000000065
ENSBTAG00000021358	ENSBTAG00000045500
ENSBTAG00000031750	ENSBTAG00000012898
ENSBTAG00000047035	ENSBTAG00000046014
ENSBTAG00000024378	ENSBTAG00000005903
ENSBTAG00000010577	ENSBTAG00000009806
ENSBTAG00000010206	ENSBTAG00000046588
ENSBTAG00000000819	ENSBTAG00000026829
ENSBTAG00000008025	ENSBTAG00000016315
ENSBTAG00000015133	ENSBTAG00000020619
ENSBTAG00000023054	ENSBTAG00000005665
ENSBTAG00000038650	ENSBTAG00000039731
ENSBTAG00000019310	ENSBTAG00000008548
ENSBTAG00000012244	ENSBTAG00000007362
ENSBTAG00000039922	ENSBTAG00000027803
ENSBTAG00000016337	ENSBTAG00000039928
ENSBTAG00000047768	ENSBTAG00000008523
ENSBTAG00000007617	ENSBTAG00000005249
ENSBTAG00000002703	ENSBTAG00000014947
ENSBTAG00000022185	ENSBTAG00000016548
ENSBTAG00000016326	ENSBTAG00000012047
ENSBTAG00000014873	ENSBTAG00000038025
ENSBTAG00000000752	ENSBTAG00000011580
ENSBTAG00000034597	ENSBTAG00000022613
ENSBTAG00000019014	ENSBTAG00000021746
ENSBTAG00000015628	ENSBTAG00000007484
ENSBTAG00000031295	ENSBTAG00000000959
ENSBTAG00000013855	ENSBTAG00000015887
ENSBTAG00000008288	ENSBTAG00000021986
ENSBTAG00000012687	ENSBTAG00000009502
ENSBTAG00000039347	ENSBTAG00000000555
ENSBTAG00000002764	ENSBTAG00000002039
ENSBTAG00000011227	ENSBTAG00000033731
ENSBTAG00000010388	ENSBTAG00000007456
ENSBTAG00000039028	ENSBTAG00000016737
ENSBTAG00000002941	ENSBTAG00000018851
ENSBTAG00000021611	ENSBTAG00000005475
ENSBTAG00000033669	ENSBTAG00000039688
ENSBTAG00000001440	ENSBTAG00000033333
ENSBTAG00000002908	ENSBTAG00000021856
ENSBTAG00000012705	ENSBTAG00000002846
ENSBTAG00000031800	ENSBTAG00000004517
ENSBTAG00000002758	ENSBTAG00000002423
ENSBTAG00000016764	ENSBTAG00000001539
ENSBTAG00000001776	ENSBTAG00000012747
ENSBTAG00000006719	ENSBTAG00000006003
ENSBTAG00000008490	ENSBTAG00000018710
ENSBTAG00000020594	ENSBTAG00000026263
ENSBTAG00000012064	ENSBTAG00000021145
ENSBTAG00000015466	ENSBTAG00000047345
ENSBTAG00000016504	ENSBTAG00000005990
ENSBTAG00000002495	ENSBTAG00000016760
ENSBTAG00000008237	ENSBTAG00000018802
ENSBTAG00000012926	ENSBTAG00000020645
ENSBTAG00000018049	ENSBTAG00000015505
ENSBTAG00000034689	ENSBTAG00000004108
ENSBTAG00000021583	ENSBTAG00000016598
ENSBTAG00000011732	ENSBTAG00000009682
ENSBTAG00000016874	ENSBTAG00000003222
ENSBTAG00000015730	ENSBTAG00000020996
ENSBTAG00000010191	ENSBTAG00000008397
ENSBTAG00000014579	ENSBTAG00000013044
ENSBTAG00000047706	ENSBTAG00000000204
ENSBTAG00000019315	ENSBTAG00000008507
ENSBTAG00000016532	ENSBTAG00000012600
ENSBTAG00000000589	ENSBTAG00000014713
ENSBTAG00000020352	ENSBTAG00000002929
ENSBTAG00000003160	ENSBTAG00000013477
ENSBTAG00000015481	ENSBTAG00000005917
ENSBTAG00000008699	ENSBTAG00000008896
ENSBTAG00000001749	ENSBTAG00000020813
ENSBTAG00000001395	ENSBTAG00000005250
ENSBTAG00000001133	ENSBTAG00000032686
ENSBTAG00000017565	ENSBTAG00000005715
ENSBTAG00000010367	ENSBTAG00000008937
ENSBTAG00000020663	ENSBTAG00000013631
ENSBTAG00000024851	ENSBTAG00000003313
ENSBTAG00000001938	ENSBTAG00000013937
ENSBTAG00000023976	ENSBTAG00000020654
ENSBTAG00000010956	ENSBTAG00000015177
ENSBTAG00000010275	ENSBTAG00000014153
ENSBTAG00000003693	ENSBTAG00000038292
ENSBTAG00000006322	ENSBTAG00000005379
ENSBTAG00000014103	ENSBTAG00000003114
ENSBTAG00000020542	ENSBTAG00000018604
ENSBTAG00000015089	ENSBTAG00000009142
ENSBTAG00000013167	ENSBTAG00000009107
ENSBTAG00000012968	ENSBTAG00000011885
ENSBTAG00000007725	ENSBTAG00000013465
ENSBTAG00000010976	ENSBTAG00000008613
ENSBTAG00000005458	ENSBTAG00000013177
ENSBTAG00000032425	ENSBTAG00000021018
ENSBTAG00000005203	ENSBTAG00000003819
ENSBTAG00000015000	ENSBTAG00000001414
ENSBTAG00000045647	ENSBTAG00000013419
ENSBTAG00000003415	ENSBTAG00000019480
ENSBTAG00000014983	ENSBTAG00000018527
ENSBTAG00000010401	ENSBTAG00000011544
ENSBTAG00000014102	ENSBTAG00000006157
ENSBTAG00000026263	ENSBTAG00000007366
ENSBTAG00000007353	ENSBTAG00000027506
ENSBTAG00000003857	ENSBTAG00000047988
ENSBTAG00000003072	ENSBTAG00000007039
ENSBTAG00000001988	ENSBTAG00000030434
ENSBTAG00000018901	ENSBTAG00000002050
ENSBTAG00000014388	ENSBTAG00000030521
ENSBTAG00000030575	ENSBTAG00000012790
ENSBTAG00000017068	ENSBTAG00000030175
ENSBTAG00000003544	ENSBTAG00000012260
ENSBTAG00000017124	ENSBTAG00000008852
ENSBTAG00000011838	ENSBTAG00000001805
ENSBTAG00000037937	ENSBTAG00000012561
ENSBTAG00000014849	ENSBTAG00000020898
ENSBTAG00000019915	ENSBTAG00000003073
ENSBTAG00000047274	ENSBTAG00000046192
ENSBTAG00000021341	ENSBTAG00000012504
ENSBTAG00000022150	ENSBTAG00000018718
ENSBTAG00000015739	ENSBTAG00000039080
ENSBTAG00000031385	ENSBTAG00000009873
ENSBTAG00000000697	ENSBTAG00000002714
ENSBTAG00000015222	ENSBTAG00000032024
ENSBTAG00000003200	ENSBTAG00000010777
ENSBTAG00000017137	ENSBTAG00000021341
ENSBTAG00000006170	ENSBTAG00000016005
ENSBTAG00000003496	ENSBTAG00000038131
ENSBTAG00000014922	ENSBTAG00000007964
ENSBTAG00000019667	ENSBTAG00000030456
ENSBTAG00000007683	ENSBTAG00000040244
ENSBTAG00000016368	ENSBTAG00000018674
ENSBTAG00000009923	ENSBTAG00000020535
ENSBTAG00000000387	ENSBTAG00000007599
ENSBTAG00000016311	ENSBTAG00000006160
ENSBTAG00000018127	ENSBTAG00000021523
ENSBTAG00000009709	ENSBTAG00000000710
ENSBTAG00000003577	ENSBTAG00000020904
ENSBTAG00000000833	ENSBTAG00000030824
ENSBTAG00000005708	ENSBTAG00000020034
ENSBTAG00000020835	ENSBTAG00000008731
ENSBTAG00000012638	ENSBTAG00000012828
ENSBTAG00000014233	ENSBTAG00000009527
ENSBTAG00000013235	ENSBTAG00000004742
ENSBTAG00000012135	ENSBTAG00000045808
ENSBTAG00000014029	ENSBTAG00000000359
ENSBTAG00000021018	ENSBTAG00000005973
ENSBTAG00000007399	ENSBTAG00000002415
ENSBTAG00000038477	ENSBTAG00000004443
ENSBTAG00000011156	ENSBTAG00000047575
ENSBTAG00000012522	ENSBTAG00000013162
ENSBTAG00000008541	ENSBTAG00000038487
ENSBTAG00000011981	ENSBTAG00000007895
ENSBTAG00000010001	ENSBTAG00000046266
ENSBTAG00000006489	ENSBTAG00000036016
ENSBTAG00000013419	ENSBTAG00000015376
ENSBTAG00000008001	ENSBTAG00000014233
ENSBTAG00000001181	ENSBTAG00000017310
ENSBTAG00000008114	ENSBTAG00000016337
ENSBTAG00000010169	ENSBTAG00000018770
ENSBTAG00000048107	ENSBTAG00000001861
ENSBTAG00000010613	ENSBTAG00000001489
ENSBTAG00000020130	ENSBTAG00000000134
ENSBTAG00000015085	ENSBTAG00000013759
ENSBTAG00000030347	ENSBTAG00000002477
ENSBTAG00000047532	ENSBTAG00000014610
ENSBTAG00000016644	ENSBTAG00000014297
ENSBTAG00000013289	ENSBTAG00000011011
ENSBTAG00000013671	ENSBTAG00000019121
ENSBTAG00000001754	ENSBTAG00000027159
ENSBTAG00000017605	ENSBTAG00000008224
ENSBTAG00000018041	ENSBTAG00000021935
ENSBTAG00000034138	ENSBTAG00000044003
ENSBTAG00000019069	ENSBTAG00000026369
ENSBTAG00000009514	ENSBTAG00000006775
ENSBTAG00000033679	ENSBTAG00000002882
ENSBTAG00000001356	ENSBTAG00000020352
ENSBTAG00000012723	ENSBTAG00000006034
ENSBTAG00000040569	ENSBTAG00000027201
ENSBTAG00000004564	ENSBTAG00000023198
ENSBTAG00000014458	ENSBTAG00000002012
ENSBTAG00000003553	ENSBTAG00000003770
ENSBTAG00000006667	ENSBTAG00000000286
ENSBTAG00000021754	ENSBTAG00000010932
ENSBTAG00000004294	ENSBTAG00000002432
ENSBTAG00000020729	ENSBTAG00000000634
ENSBTAG00000001388	ENSBTAG00000002703
ENSBTAG00000012976	ENSBTAG00000006978
ENSBTAG00000018589	ENSBTAG00000030257
ENSBTAG00000001113	ENSBTAG00000021396
ENSBTAG00000021378	ENSBTAG00000009446
ENSBTAG00000002485	ENSBTAG00000046172
ENSBTAG00000002885	ENSBTAG00000006752
ENSBTAG00000019015	ENSBTAG00000004913
ENSBTAG00000019040	ENSBTAG00000018385
ENSBTAG00000000333	ENSBTAG00000010206
ENSBTAG00000012787	ENSBTAG00000039466
ENSBTAG00000005249	ENSBTAG00000024443
ENSBTAG00000022825	ENSBTAG00000009459
ENSBTAG00000015265	ENSBTAG00000012505
ENSBTAG00000018272	ENSBTAG00000005450
ENSBTAG00000014713	ENSBTAG00000040333
ENSBTAG00000003718	ENSBTAG00000005364
[truncated: 4,444 more rows]

## Sheet: DE genes control vs. ST103_up
genes	logFC	logCPM	LR	PValue	FDR
ENSBTAG00000018290	9.76341	1.93137149749649	262.954924336159	3.89427768137361e-59	1.1934292117261e-56
ENSBTAG00000002894	9.7576	1.6637341957299	250.973157723433	1.59325077093532e-56	4.27230194226307e-54
ENSBTAG00000009012	9.17305	11.1688704150963	231.184808685251	3.28820127363447e-52	7.50409507680921e-50
ENSBTAG00000020892	9.16033	6.71445560411959	465.052408145441	3.82307565490417e-103	1.02515773686255e-99
ENSBTAG00000022779	9.00063	1.66814227871187	102.254003101488	4.88401727717337e-24	1.50103063939718e-22
ENSBTAG00000004337	8.88121	4.9267602726898	526.797394562636	1.40506674020566e-116	1.50707458554459e-112
ENSBTAG00000002669	8.69875	3.98967943161977	281.794715461505	3.05141255030076e-63	1.12860175912159e-60
ENSBTAG00000004741	8.43282	5.35106780096345	86.0479915063002	1.75621422494146e-20	3.92440703681709e-19
ENSBTAG00000013496	8.2984	5.97238385150662	190.890554959395	2.0320971400946e-43	2.90616985662063e-41
ENSBTAG00000020755	8.22326	2.75006961099969	122.436674357506	1.85234059211223e-28	8.49068597905801e-27
ENSBTAG00000025260	8.11691	0.834548310022125	79.4049059399752	5.06003068522311e-19	9.58902634800407e-18
ENSBTAG00000004378	7.79412	6.31360584556486	113.393542096985	1.76930252762181e-26	6.87591989538823e-25
ENSBTAG00000006720	7.76763	0.0617714201476573	126.299299634412	2.64436909990009e-29	1.30707386937919e-27
ENSBTAG00000000575	7.67926	-0.0240339486888228	58.7579070272844	1.7831550997531e-14	2.08800454147945e-13
ENSBTAG00000014113	7.62003	6.67870362591417	126.071007478715	2.96675683354916e-29	1.45303350669627e-27
ENSBTAG00000013210	7.21431	1.87565664889597	193.696439099567	4.96041484488617e-44	7.28841227756837e-42
ENSBTAG00000045822	7.08397	1.38529878552956	197.48403630885	7.39415377718603e-45	1.14941584658112e-42
ENSBTAG00000003827	6.88875	-0.377537375312686	84.3667464083531	4.11002823814777e-20	8.74685771475654e-19
ENSBTAG00000006738	6.81327	3.82775821419269	69.1768618679089	9.00179448441999e-17	1.37344591237395e-15
ENSBTAG00000001197	6.76064	10.692487872688	296.391190871529	2.01383998382582e-66	8.64017906660631e-64
ENSBTAG00000020813	6.68568	0.679987394018088	40.9564189680917	1.55661912782568e-10	1.16107766099154e-09
ENSBTAG00000002215	6.62711	6.98705612432767	319.546723091907	1.81817206072358e-71	1.21885709520757e-68
ENSBTAG00000002912	6.60474	3.9900879983705	187.792190919586	9.64411856684568e-43	1.32618994548701e-40
ENSBTAG00000007851	6.5167	-0.547661058762016	65.9740760046183	4.56893093516978e-16	6.38103557430093e-15
ENSBTAG00000046944	6.51252	6.21841805583317	59.6319256598897	1.14364779793505e-14	1.36297403118348e-13
ENSBTAG00000012297	6.51062	3.5657405541638	308.205577766312	5.37193935483455e-69	2.61906461454343e-66
ENSBTAG00000015060	6.50937	6.651921773502	154.617470959039	1.69741781262618e-35	1.38980942429225e-33
ENSBTAG00000037800	6.49443	10.4462511040693	337.583496071341	2.14361904123679e-75	1.91603815302548e-72
ENSBTAG00000013578	6.39618	5.41557254189033	168.500789167144	1.57259680338165e-38	1.60644507743539e-36
ENSBTAG00000002595	6.22912	1.3245467286192	183.572168199917	8.04474700655871e-42	1.06528341225122e-39
ENSBTAG00000005033	6.20085	-1.01019628942429	47.4792547880182	5.55891245806981e-12	4.95635037616432e-11
ENSBTAG00000000016	6.13069	2.83115850863739	259.632757617183	2.0633192209393e-58	5.82398999047235e-56
ENSBTAG00000019975	6.0836	6.50412252355066	101.434038622541	7.38832101567934e-24	2.24496122419764e-22
ENSBTAG00000026278	6.02288	0.929284842258571	130.538610018472	3.12396424579714e-30	1.64253139707942e-28
ENSBTAG00000007927	5.97291	9.26428593553242	200.150928687813	1.93595804188075e-45	3.19462860880199e-43
ENSBTAG00000021516	5.92724	1.63078931519397	24.0521077800516	9.37635675751522e-07	4.12513546271978e-06
ENSBTAG00000007424	5.91967	6.61904785672692	141.742479781283	1.1071078218138e-32	7.06835624808027e-31
ENSBTAG00000008091	5.86478	1.88012930979533	103.997574613164	2.02563869026635e-24	6.44718118450946e-23
ENSBTAG00000008331	5.86252	0.938351716225253	141.190981343274	1.46144088324432e-32	9.22083230216386e-31
ENSBTAG00000001621	5.80797	-0.291143410558806	110.114766628036	9.24786059643023e-26	3.34430551191443e-24
ENSBTAG00000018248	5.79665	1.04544067725499	113.406839495904	1.75747668404286e-26	6.85479815019771e-25
ENSBTAG00000022813	5.79663	5.00867980648074	412.767691588578	9.15537159786046e-92	1.63667526264419e-88
ENSBTAG00000038067	5.79032	0.149453831029209	56.8161929345346	4.7850989394551e-14	5.34635116922869e-13
ENSBTAG00000039509	5.73505	0.803361346114384	73.162956887845	1.19375325373469e-17	1.98207390086041e-16
ENSBTAG00000002349	5.67397	0.239286498076989	106.386412774856	6.06723044209082e-25	2.02732441501141e-23
ENSBTAG00000015170	5.65428	-0.0182523968174346	58.2251759279843	2.33768228570996e-14	2.71657423580986e-13
ENSBTAG00000023718	5.61605	-0.725938196849048	92.241487738507	7.67194318648202e-22	1.94078449571241e-20
ENSBTAG00000046375	5.57324	5.02046519953687	35.5634091623351	2.46881705076115e-09	1.56875187716019e-08
ENSBTAG00000015749	5.53811	-0.495315568138864	88.2463575625468	5.77895632282957e-21	1.35043759299934e-19
ENSBTAG00000005275	5.48684	4.12525305438737	169.6020327031	9.03830717363249e-39	9.59850324201802e-37
ENSBTAG00000015163	5.46854	0.784657354946298	64.4205837559492	1.00502693669713e-15	1.34748986537668e-14
ENSBTAG00000021945	5.39364	0.509949749340986	104.249018762206	1.78421348777686e-24	5.73181096639262e-23
ENSBTAG00000023659	5.382	8.82940731748013	167.208509300687	3.01220709515881e-38	2.96412232134619e-36
ENSBTAG00000003506	5.35867	-0.747842118274264	86.4992279168997	1.39791872903508e-20	3.17671107788776e-19
ENSBTAG00000006692	5.32263	1.27827476783519	66.335212494472	3.80401999725295e-16	5.37574683669764e-15
ENSBTAG00000044078	5.31755	-0.751497183996073	46.1437650607392	1.09886158350749e-11	9.46697939333444e-11
ENSBTAG00000025258	5.29429	1.29236294374721	109.202861113134	1.46498536954619e-25	5.16889245847118e-24
ENSBTAG00000002085	5.15864	2.0997964059127	120.253307093755	5.56773261373764e-28	2.4375306128551e-26
ENSBTAG00000047600	5.13266	0.603208827003144	101.075433122005	8.85463195868164e-24	2.65292688236925e-22
ENSBTAG00000018015	5.1251	6.47821448679463	504.748464975042	8.80663135253854e-112	4.72299639436642e-108
ENSBTAG00000003994	5.04857	0.105383381528665	109.496029795736	1.26357356274874e-25	4.47296700793498e-24
ENSBTAG00000008294	5.03941	5.51542691197744	289.521356669937	6.32191505087661e-65	2.60803310906548e-62
ENSBTAG00000009654	5.03832	-0.849937913336098	25.4733629038157	4.48533004079024e-07	2.09172391380505e-06
ENSBTAG00000015632	5.00463	1.19495861057109	85.6100545245138	2.19158262417552e-20	4.81699082518579e-19
ENSBTAG00000004269	4.9726	10.3689939181914	130.803355679163	2.73390742020249e-30	1.45167777173722e-28
ENSBTAG00000006519	4.93485	-0.716212901890981	85.6738052236553	2.12205428815927e-20	4.67444292370353e-19
ENSBTAG00000025405	4.93118	2.65632444800749	263.068156598853	3.67913779069504e-59	1.16065976302927e-56
ENSBTAG00000025250	4.91787	12.1490456679754	107.537566326666	3.39410629751185e-25	1.15940076901631e-23
ENSBTAG00000038990	4.91169	5.37787711438147	321.955641954539	5.43155364467883e-72	3.88392295952168e-69
ENSBTAG00000007596	4.88652	3.50015127420525	138.20047197573	6.58789290116042e-32	4.01487154874129e-30
ENSBTAG00000037811	4.86518	10.0161911574267	109.83189816371	1.06663097947998e-25	3.81356129530076e-24
ENSBTAG00000000634	4.82806	-0.936500319760322	36.388196609968	1.61679385708847e-09	1.05871373083827e-08
ENSBTAG00000003667	4.82515	-0.757199414205393	78.3407366601428	8.67150413650418e-19	1.61757484118511e-17
ENSBTAG00000017113	4.79223	0.725439043557599	157.144795903036	4.75893954090631e-36	4.05114170760009e-34
ENSBTAG00000046699	4.78256	3.21736526878275	77.6851003022283	1.20849533939581e-18	2.22338267759167e-17
ENSBTAG00000015353	4.77588	-0.14507057453045	85.5333281864203	2.27829080257426e-20	4.98713207110439e-19
ENSBTAG00000020602	4.74039	5.15617196900791	87.0627756245518	1.0513074100256e-20	2.41463025266266e-19
ENSBTAG00000014599	4.71648	2.39745098151852	106.444129635605	5.89307236969332e-25	1.98147630838027e-23
ENSBTAG00000009987	4.69011	6.5404927026738	75.8445860389817	3.06892702542814e-18	5.41403145966155e-17
ENSBTAG00000005760	4.66139	4.81349669589291	68.1456255408661	1.51855984430078e-16	2.25596577423409e-15
ENSBTAG00000001595	4.62616	-1.31828329939032	43.844767500511	3.55480243789408e-11	2.87981955807039e-10
ENSBTAG00000018232	4.62435	-0.0729709066804004	45.7519306841138	1.34217002282965e-11	1.1471008497905e-10
ENSBTAG00000008096	4.59603	8.70982138137402	73.6646251865532	9.25833161600663e-18	1.55163851427011e-16
ENSBTAG00000001725	4.56928	0.83896843159259	65.987720978222	4.53740961062305e-16	6.34527450893648e-15
ENSBTAG00000007783	4.56656	2.7136181557454	262.538205221711	4.80018689276841e-59	1.41274567565001e-56
ENSBTAG00000010344	4.56437	0.0201930665203412	117.938290598032	1.78867250008003e-27	7.58312301812584e-26
ENSBTAG00000025257	4.52608	11.9379925298529	129.007671457835	6.75567614862058e-30	3.48372030625502e-28
ENSBTAG00000032152	4.49133	-0.577470428251322	73.6865386068091	9.15611739000028e-18	1.53690946987704e-16
ENSBTAG00000018069	4.45194	4.32935975133603	102.895593258093	3.53284601427928e-24	1.10154960317324e-22
ENSBTAG00000016061	4.40824	6.39426401530298	42.5919571898794	6.74361015611327e-11	5.24524746442864e-10
ENSBTAG00000026637	4.40699	-0.601074876387288	83.8462534027075	5.34788475166941e-20	1.13362474004755e-18
ENSBTAG00000018578	4.39909	5.7924889182513	116.786190770293	3.197443853638e-27	1.34493265780867e-25
ENSBTAG00000013027	4.38243	-1.28168706536549	22.3068205376105	2.32379772196966e-06	9.59763356405335e-06
ENSBTAG00000039688	4.375	-0.815011192581908	60.1972710209199	8.5811091932777e-15	1.04118752496716e-13
ENSBTAG00000012991	4.37475	0.349551779916517	52.5005309799588	4.30132021565231e-13	4.35244911632893e-12
ENSBTAG00000020762	4.36216	-0.742139740086869	43.0671176507472	5.28938040967085e-11	4.18700326746343e-10
ENSBTAG00000007191	4.36055	9.57399524088786	101.011463852674	9.14526179990867e-24	2.73236986255767e-22
ENSBTAG00000016698	4.33395	0.133768015003224	61.813883589492	3.77503253259689e-15	4.78617008801823e-14
ENSBTAG00000039992	4.32345	10.6545281807129	146.563754560375	9.77456833980372e-34	6.85241960867547e-32
ENSBTAG00000006965	4.29713	-0.723924036879717	39.2987256409746	3.6367859908687e-10	2.60749776323915e-09
ENSBTAG00000000329	4.29513	-0.794206040774842	39.8599863497154	2.72835655905918e-10	1.98941892946763e-09
ENSBTAG00000005475	4.29307	1.75456096211262	45.5523241009389	1.48615238481109e-11	1.26411344008594e-10
ENSBTAG00000020095	4.28274	3.0687410377822	69.0596190415591	9.5531463084132e-17	1.45343329509277e-15
ENSBTAG00000040518	4.26763	6.9613557167346	133.972489130234	5.53978074348256e-31	3.14389884944942e-29
ENSBTAG00000017719	4.25252	0.879428957139169	109.735876457502	1.11957103986461e-25	3.98954118723847e-24
ENSBTAG00000003113	4.23619	3.40749026177882	85.3015425746082	2.56163326259127e-20	5.58456877531584e-19
ENSBTAG00000002362	4.22306	5.51962375489445	159.912806024238	1.18222244783595e-36	1.04797669218912e-34
ENSBTAG00000000920	4.22059	4.96600107148148	93.4387850382898	4.18959889996468e-22	1.0933731825066e-20
ENSBTAG00000039504	4.18735	2.22369331477201	37.5651565934596	8.84097534615595e-10	5.97908584885679e-09
ENSBTAG00000016388	4.17602	7.74536046164004	113.563016549369	1.62436030490765e-26	6.38201048734046e-25
ENSBTAG00000019131	4.1688	1.72976560814515	166.692822599204	3.90416086877326e-38	3.77261526832991e-36
ENSBTAG00000008021	4.16619	3.32678491978555	93.1403169422397	4.8715207038467e-22	1.25908267637252e-20
ENSBTAG00000000648	4.16402	0.591803196093583	68.0843632428379	1.56647979639281e-16	2.32393669379105e-15
ENSBTAG00000012057	4.15551	0.553455244385728	53.6978498713314	2.33819011705783e-13	2.42079413084578e-12
ENSBTAG00000004347	4.14775	2.46425716031076	80.0815024958189	3.59280122124579e-19	6.96860504504201e-18
ENSBTAG00000019665	4.14775	11.4100823445645	88.8855581047148	4.1832624710053e-21	9.88318794361295e-20
ENSBTAG00000014087	4.14454	3.76948405185436	228.678753253863	1.15741205481528e-51	2.53355136733647e-49
ENSBTAG00000019225	4.14057	7.28729895420332	170.060075669267	7.17869291069455e-39	7.77764244041513e-37
ENSBTAG00000039446	4.14022	3.13453553764796	23.6932971571583	1.12975329657506e-06	4.91193103326473e-06
ENSBTAG00000040078	4.13567	6.80910264220886	484.95826828028	1.78175088951482e-107	6.37035334697867e-104
ENSBTAG00000005280	4.13352	3.15777670687721	83.4969668874076	6.38138059903577e-20	1.33164763239801e-18
ENSBTAG00000019036	4.11706	0.973465475241011	61.4071767352457	4.64115709561069e-15	5.82104216069582e-14
ENSBTAG00000018572	4.10394	1.2637094380453	47.2503471765632	6.2474917130872e-12	5.51073981205372e-11
ENSBTAG00000046158	4.09651	8.71216973272596	262.508064260796	4.87335353338153e-59	1.41274567565001e-56
ENSBTAG00000045588	4.09439	7.07424412700356	99.4293283931185	2.03289684115729e-23	5.94137643549132e-22
ENSBTAG00000011403	4.08931	6.16151587518906	308.522810859102	4.58165985318981e-69	2.34013731358637e-66
ENSBTAG00000040161	4.08378	4.56514491208474	75.6179047528608	3.44225959998655e-18	6.0329536714797e-17
ENSBTAG00000044208	4.06736	0.962907187961179	122.507500382169	1.7873827522115e-28	8.22809759666119e-27
ENSBTAG00000021035	4.06345	9.33440421234869	385.884061674981	6.51529474621409e-86	8.73538143098654e-83
ENSBTAG00000021957	4.04722	5.26450440262652	305.502118696484	2.08487797762312e-68	9.72278312521114e-66
ENSBTAG00000006143	4.03792	-0.677245833376225	47.726002159402	4.90147411094490e-12	4.4068073188596e-11
ENSBTAG00000034238	4.01872	-1.12557046315056	38.584108479258	5.24441982705661e-10	3.66221660579487e-09
ENSBTAG00000010943	3.97762	-0.28252577582725	53.8195349726695	2.19776624796072e-13	2.2864443041345e-12
ENSBTAG00000010472	3.9721	0.93039574988209	131.575324050901	1.8530792673331e-30	1.00384485966742e-28
ENSBTAG00000021978	3.97179	1.28818934758998	105.848390625166	7.95979043925597e-25	2.6350837114648e-23
ENSBTAG00000020242	3.96945	3.92776125750453	118.705480379891	1.21493366645687e-27	5.21255140256657e-26
ENSBTAG00000001570	3.94239	6.6222463903463	21.8175032514011	2.99852210643432e-06	1.21780189752421e-05
ENSBTAG00000011354	3.93909	8.2126521771938	162.617047337741	3.03307445092003e-37	2.82893535309289e-35
ENSBTAG00000014471	3.93136	7.64352655769539	99.9146971240498	1.59104202604323e-23	4.67548404694238e-22
ENSBTAG00000006685	3.90434	8.26331840285426	272.656807824842	2.9914370291251e-61	9.72307684072601e-59
ENSBTAG00000020580	3.89471	8.11473147873763	64.501285527583	9.64693880910941e-16	1.29991288525763e-14
ENSBTAG00000039028	3.88753	1.12275517638116	32.7585570571277	1.04345941358699e-08	6.10258760639805e-08
ENSBTAG00000014795	3.88476	-0.823602161367872	50.2716392152047	1.33870343148468e-12	1.2866427424825e-11
ENSBTAG00000014585	3.88263	0.419079630544387	26.4279829440247	2.73548717944158e-07	1.31928217116414e-06
ENSBTAG00000016771	3.87289	7.71043024992597	89.8893381676396	2.51860633561668e-21	6.07952522795404e-20
ENSBTAG00000013909	3.83191	-0.9115128566498	27.054175593469	1.97832425173034e-07	9.75161117833622e-07
ENSBTAG00000047904	3.8289	6.5517211890284	91.4381969306569	1.15132466421498e-21	2.87858003458505e-20
ENSBTAG00000016291	3.82357	-1.0227817189614	54.767941073597	1.35635340193682e-13	1.45047323919983e-12
ENSBTAG00000002150	3.82228	-1.00761218202474	17.1748107367377	3.40927176732975e-05	0.000115428816213317
ENSBTAG00000005404	3.82	0.297143866369284	64.0876351858131	1.19006092985838e-15	1.58961314242354e-14
ENSBTAG00000018281	3.81594	1.50724188397977	126.99492893849	1.86248808563195e-29	9.29164986348294e-28
ENSBTAG00000015644	3.81395	0.793242528053355	95.5620032009289	1.43331168942793e-22	3.93189288511612e-21
ENSBTAG00000027937	3.80301	10.5253412324842	205.458207307569	1.34526178378223e-46	2.3083754720595e-44
ENSBTAG00000014199	3.77676	0.967823230019307	82.7260723315888	9.42498426726363e-20	1.93822483977711e-18
ENSBTAG00000015793	3.77119	3.11379932699836	93.959434441687	3.22056997067027e-22	8.48494738106803e-21
ENSBTAG00000027676	3.76411	2.97610337355349	93.5341813597821	3.99245767367029e-22	1.04701958454248e-20
ENSBTAG00000002813	3.75658	6.96941347036706	353.728701622838	6.53392440933582e-79	7.78698591272622e-76
ENSBTAG00000032719	3.75569	8.15422710553791	48.4538556349292	3.38152818512021e-12	3.10799240047981e-11
ENSBTAG00000000861	3.74249	1.06782925398296	79.5205736635533	4.77229888955436e-19	9.0919498915382e-18
ENSBTAG00000004023	3.72845	-0.516046082765364	53.4225493161321	2.68991449067277e-13	2.77156799490453e-12
ENSBTAG00000014127	3.7243	12.0001270251221	71.8037127040768	2.3770457981579e-17	3.85138870559541e-16
ENSBTAG00000009393	3.71152	-0.0802843040911149	67.5711462595698	2.03219920677467e-16	2.96159900704688e-15
ENSBTAG00000020713	3.70138	3.58135984963564	182.851329330365	1.15580837896849e-41	1.47585722295429e-39
ENSBTAG00000006999	3.69501	3.08742892450166	119.125253059547	9.83209204582521e-28	4.2523798098194e-26
ENSBTAG00000010361	3.69474	-0.00312468745249772	27.1356228065002	1.89670506438775e-07	9.37082382340996e-07
ENSBTAG00000011970	3.66792	6.62059041073478	167.24006845061	2.96477227109636e-38	2.94445809072033e-36
ENSBTAG00000021291	3.63389	2.48027913736673	124.801224449808	5.62569641765109e-29	2.66996547680202e-27
ENSBTAG00000001683	3.59797	-0.161057284192453	41.4647532355196	1.20015396787524e-10	9.05900876807165e-10
ENSBTAG00000010998	3.5735	8.43433835491708	413.142322006156	7.58804613202369e-92	1.62778765624172e-88
ENSBTAG00000039513	3.56814	4.8618269659313	82.2125847219277	1.22209267622012e-19	2.47791418622629e-18
ENSBTAG00000021249	3.55748	5.05156604351761	80.7549725454136	2.55514260290391e-19	5.02870817591694e-18
ENSBTAG00000021176	3.55571	3.45366683850688	258.626318535062	3.41939199510686e-58	9.40420475372211e-56
ENSBTAG00000014857	3.54579	3.40397838428236	57.2245091907798	3.88795735563914e-14	4.4176091733671e-13
ENSBTAG00000016566	3.53839	4.30753014327875	77.6463027670302	1.23246786274975e-18	2.25587889007745e-17
ENSBTAG00000021378	3.53327	0.487992336421734	29.7601501746492	4.8893962544798e-08	2.63933891421995e-07
ENSBTAG00000014707	3.53204	6.82330722192601	65.6309544808215	5.4377936806321e-16	7.55515220446372e-15
ENSBTAG00000022715	3.52541	3.95501558781048	43.0568984700647	5.31708063231129e-11	4.20272710848717e-10
ENSBTAG00000016998	3.52479	2.68715877221374	95.8565785841447	1.23514902412503e-22	3.40570910867996e-21
ENSBTAG00000018438	3.52357	4.29032417767372	318.877109914146	2.54385489611449e-71	1.60502280092494e-68
ENSBTAG00000034954	3.51957	1.96691369055552	10.4485091423464	0.00122748487634594	0.00304486650871567
ENSBTAG00000001470	3.50578	5.09499070754523	103.524356699942	2.57212490105617e-24	8.13823353649807e-23
ENSBTAG00000002977	3.50319	9.54872483532473	205.442613840567	1.35584238989137e-46	2.3083754720595e-44
ENSBTAG00000021326	3.49583	6.21806922818899	48.0593907916492	4.13502441012996e-12	3.74596890397415e-11
ENSBTAG00000025462	3.4954	4.36439679855634	179.77748267761	5.42007178271849e-41	6.60632840243619e-39
ENSBTAG00000000838	3.48836	6.23654579771734	77.6650451506296	1.22082835596005e-18	2.23839400786795e-17
ENSBTAG00000031430	3.48706	7.75615606529165	130.971428947534	2.51195828928405e-30	1.34046092591347e-28
ENSBTAG00000038048	3.48657	2.13613505657221	153.892062713397	2.44521750586056e-35	1.98692446726215e-33
ENSBTAG00000011007	3.46636	2.98489180870684	166.053668650658	5.38446668142608e-38	5.15658835937287e-36
ENSBTAG00000002908	3.46449	2.57343569797851	32.5990138236948	1.13272209353808e-08	6.60662162875986e-08
ENSBTAG00000016455	3.46214	0.230639910045622	52.1715155936679	5.08585409718423e-13	5.08870065731325e-12
ENSBTAG00000006078	3.45431	1.5958503812669	89.8709948468202	2.54206630693348e-21	6.11349847716783e-20
ENSBTAG00000008612	3.44532	4.2015365124262	75.9871684239924	2.8551402757043e-18	5.07023751609342e-17
ENSBTAG00000038737	3.42344	0.798159028835308	61.6010484501141	4.20594619047541e-15	5.29495056796235e-14
ENSBTAG00000015361	3.40881	0.428948448087859	69.3765264836877	8.13511154901597e-17	1.24831482796488e-15
ENSBTAG00000004515	3.40613	-1.53800176498489	18.0740279764939	2.124800929778e-05	7.44548016099275e-05
ENSBTAG00000011238	3.40066	8.2466349306347	121.731321876033	2.64314521397942e-28	1.20639896021886e-26
ENSBTAG00000003711	3.3954	2.39283436429871	96.3403114656419	9.67401343292932e-23	2.68122656541602e-21
ENSBTAG00000025471	3.39211	9.30917352821926	78.6069798712153	7.57811877704951e-19	1.42351842386398e-17
ENSBTAG00000006707	3.39093	10.301730752354	151.713403724195	7.3192091740438e-35	5.64790198566862e-33
ENSBTAG00000003751	3.38779	1.22711288341412	92.2899855883446	7.48621704020232e-22	1.89827810811371e-20
ENSBTAG00000021515	3.38567	1.42380593022539	52.6927254040663	3.90033087208021e-13	3.9703610670525e-12
ENSBTAG00000047839	3.37009	0.271571233573834	99.2493074610123	2.22634440886386e-23	6.47148241991158e-22
ENSBTAG00000005738	3.36773	1.97520517544254	103.093503535282	3.19697699442284e-24	9.99731056623305e-23
ENSBTAG00000005412	3.3656	7.75192773269035	392.739351422191	2.09663302142319e-87	3.21264082682645e-84
ENSBTAG00000020936	3.35314	4.12123994705543	315.497813580826	1.38546750057351e-70	7.82132863744816e-68
ENSBTAG00000007449	3.34595	1.07012585619739	54.0696345515161	1.93508742234597e-13	2.03089507750321e-12
ENSBTAG00000008100	3.34195	0.924249659012785	66.6757564879217	3.20047072474648e-16	4.57709986581744e-15
ENSBTAG00000006894	3.34012	10.8121647501029	92.7739813325559	5.86207789212458e-22	1.50063597782645e-20
ENSBTAG00000013489	3.33193	2.71811885579019	137.332341308507	1.02001810459425e-31	6.07817454993216e-30
ENSBTAG00000044023	3.32971	5.18669856986271	282.661565231468	1.97517044951126e-63	7.56631365766348e-61
ENSBTAG00000038650	3.32653	4.7839166948794	33.25258865788	8.09319458009683e-09	4.79335201911202e-08
ENSBTAG00000017846	3.32139	4.77468148793984	45.6505893696412	1.41343539354693e-11	1.20417061407342e-10
ENSBTAG00000014762	3.32017	1.04379802172427	72.6674024569418	1.53447811155689e-17	2.51663795482557e-16
ENSBTAG00000002115	3.30853	-0.790900534268785	48.6813818858271	3.01111378101738e-12	2.78424193234418e-11
ENSBTAG00000022150	3.30494	-0.997161189608881	31.1079538839825	2.44069228442106e-08	1.36632909408665e-07
ENSBTAG00000018016	3.28015	5.75109754588749	63.9467311830676	1.27829231536052e-15	1.70111208121054e-14
ENSBTAG00000004086	3.27172	2.45421259026691	63.5419582842969	1.56987169800626e-15	2.07114930292929e-14
ENSBTAG00000008816	3.26554	2.80379267811186	68.46134425492	1.29389247682989e-16	1.93560539839294e-15
ENSBTAG00000017263	3.25282	7.50578662204994	146.546451490368	9.86007459013636e-34	6.86747792557159e-32
ENSBTAG00000012216	3.24045	5.75911613916925	181.67892917282	2.0837765940963e-41	2.62948091156199e-39
ENSBTAG00000002714	3.24014	3.35994380920855	36.7769519382196	1.32446843081888e-09	8.74768989468183e-09
ENSBTAG00000005268	3.23374	0.0704223666627681	19.9905558650208	7.78255973572754e-06	2.95803457567022e-05
ENSBTAG00000017150	3.22298	6.06328531978564	168.062248063053	1.96067102447123e-38	1.9839771140074e-36
ENSBTAG00000010745	3.21052	4.97175531210135	214.520356970086	1.41808002372288e-48	2.71612970258065e-46
ENSBTAG00000009663	3.20866	7.17219381458718	178.6519609687	9.5446039974415e-41	1.13750469418397e-38
ENSBTAG00000040512	3.2072	1.63217192137612	81.9927963378501	1.36583587903888e-19	2.76414257331528e-18
ENSBTAG00000016208	3.19088	4.36223174776544	101.14038599474	8.56898359950083e-24	2.58176736202938e-22
ENSBTAG00000024492	3.18356	1.2460813151714	132.052734848203	1.45696992813457e-30	8.01408176880584e-29
ENSBTAG00000021187	3.17941	7.95402496560579	202.242706862834	6.76762608309533e-46	1.13421183386376e-43
ENSBTAG00000048171	3.16709	8.99427259216685	23.4012035711505	1.31496238823956e-06	5.63945884696421e-06
ENSBTAG00000007431	3.15765	0.796291522523973	4.93515534550764	0.0263156971370119	0.0477358646189058
ENSBTAG00000007280	3.15098	6.21977524421184	186.08242674939	2.27771034901786e-42	3.0538401504457e-40
ENSBTAG00000008271	3.14961	4.63180365800989	71.2309090925033	3.17770758901776e-17	5.09478200296031e-16
ENSBTAG00000016163	3.14546	2.17133965434476	69.8647029710588	6.35148968100882e-17	9.95995297054102e-16
ENSBTAG00000015085	3.13678	-0.377690819033661	30.2723026609763	3.75449138414468e-08	2.05462625440489e-07
ENSBTAG00000009786	3.13183	-0.202808436976129	50.2081913056672	1.38269433764145e-12	1.32773316611837e-11
ENSBTAG00000009064	3.13091	8.34263051902756	87.760583898158	7.38765582598015e-21	1.71515143700137e-19
ENSBTAG00000031267	3.12229	0.575198624320472	22.9940616743662	1.6250258152064e-06	6.88389687752917e-06
ENSBTAG00000027348	3.11224	-0.698911447566329	34.6807471100715	3.88454410500618e-09	2.39182664008589e-08
ENSBTAG00000019636	3.1122	2.22608090858895	33.727597210671	6.33949202784006e-09	3.82222549132167e-08
ENSBTAG00000004581	3.10845	-0.289117997988015	18.2493223924232	1.9379487748382e-05	6.8398942280074e-05
ENSBTAG00000021497	3.07722	1.53622254205372	56.7863467974429	4.85827757613911e-14	5.4224646494972e-13
ENSBTAG00000009770	3.07252	7.78066120155465	120.6100367365	4.65138797542304e-28	2.0701571545389e-26
ENSBTAG00000030650	3.07155	-0.421608493011695	55.7474558985438	8.24048490294088e-14	9.0007577463283e-13
ENSBTAG00000000589	3.06465	0.269597727702132	32.146409640318	1.42980676354699e-08	8.2231138583405e-08
ENSBTAG00000026429	3.06345	3.24578862990916	91.9251347677447	9.00183767542797e-22	2.26651903536715e-20
ENSBTAG00000002346	3.06268	7.48825303655649	274.058380800209	1.48056265455256e-61	4.96266094772836e-59
ENSBTAG00000031648	3.06196	0.650575870485816	80.3040654090605	3.21007942571826e-19	6.26023853095528e-18
ENSBTAG00000047766	3.04966	3.54256771259756	116.086515312423	4.55007833984477e-27	1.88432974027703e-25
ENSBTAG00000012039	3.04405	7.03671844600757	61.9645208039765	3.49701547332766e-15	4.46004613161861e-14
ENSBTAG00000017455	3.02604	8.35897554860495	155.974301487543	8.57596876241474e-36	7.24297960202052e-34
ENSBTAG00000015432	3.01964	1.61449118463528	113.718475348936	1.50187184612732e-26	5.92245493439766e-25
ENSBTAG00000033702	3.01855	4.57377140752802	108.824373323933	1.77321563018157e-25	6.19528040694707e-24
ENSBTAG00000001468	3.01626	3.16721916144008	189.014355382692	5.21769682766365e-43	7.268183918639e-41
ENSBTAG00000037775	3.01344	9.29317245363615	59.186575863787	1.43408833015078e-14	1.69405632480146e-13
ENSBTAG00000019138	3.00007	3.36535212614568	103.540240746519	2.5515857997998e-24	8.09713292563687e-23
ENSBTAG00000031885	2.99049	6.48906764336285	334.367336097188	1.07546023648543e-74	8.23956178324478e-72
ENSBTAG00000000559	2.98788	4.90665094845184	20.5466459154823	5.81956701682093e-06	2.2649011546597e-05
ENSBTAG00000014855	2.98636	6.35540309426635	124.9921384888	5.1096720100698e-29	2.43583742133372e-27
ENSBTAG00000017201	2.9821	3.51956309572654	194.273252092786	3.71214945900423e-44	5.5300715412888e-42
ENSBTAG00000020931	2.981	4.0922587673297	26.7472495871476	2.31881543189477e-07	1.1289883941218e-06
ENSBTAG00000001325	2.97896	3.32833378773431	63.4843038802208	1.61649737334111e-15	2.1300430990733e-14
ENSBTAG00000009749	2.97108	0.162589690304198	51.404753699202	7.51563325743465e-13	7.39565892837102e-12
ENSBTAG00000000961	2.96532	0.844702128785898	104.425330891628	1.63230346373592e-24	5.28945225136903e-23
ENSBTAG00000009315	2.94934	4.30941265083292	47.0567622042102	6.89603224674869e-12	6.0628558916907e-11
ENSBTAG00000014484	2.94306	1.16049441991655	38.4104077660903	5.73258549768312e-10	3.95673822703662e-09
ENSBTAG00000013960	2.9423	3.99144898488454	91.1972150649164	1.30043149951304e-21	3.24382052645974e-20
ENSBTAG00000013235	2.93897	0.390862285436187	30.7065377924032	3.00152026678641e-08	1.65950032894593e-07
ENSBTAG00000005450	2.92145	4.84762602170176	53.8139382563407	2.20403569092304e-13	2.29074484698067e-12
ENSBTAG00000001785	2.89843	15.3157370228913	68.9131147622211	1.02898273165001e-16	1.55887977114097e-15
ENSBTAG00000019806	2.8983	0.955554283901007	73.7876731490047	8.69881340226584e-18	1.46934602445202e-16
ENSBTAG00000000936	2.8953	0.980451160651955	61.1136365694592	5.38736895718436e-15	6.70358694138741e-14
ENSBTAG00000003033	2.8765	1.66870476689116	75.9341183735427	2.9328849213125e-18	5.19968986214841e-17
ENSBTAG00000021609	2.87491	-0.208685360315717	44.5164720598833	2.52226133772173e-11	2.0858731772092e-10
ENSBTAG00000015318	2.87357	3.73332421397789	146.982694623755	7.91615462623334e-34	5.69856875979724e-32
ENSBTAG00000019070	2.86802	6.53626159019451	83.8288757302643	5.39510061242028e-20	1.13689291097878e-18
ENSBTAG00000019129	2.86442	2.30368549444567	62.4739313505337	2.69994937377775e-15	3.47654945775993e-14
ENSBTAG00000030575	2.86034	3.92770078086942	31.3686475338799	2.13399210019694e-08	1.20090237495868e-07
ENSBTAG00000012482	2.8558	3.48649221471105	28.8053727273938	8.0028799782599e-08	4.18114421075576e-07
ENSBTAG00000003312	2.8511	7.51644355006448	345.031304650876	5.11876564580727e-77	5.49038803169288e-74
ENSBTAG00000019465	2.84201	6.78628093116225	248.934772655232	4.43272502209849e-56	1.13203353778639e-53
ENSBTAG00000013222	2.82724	0.610154690401624	92.5704900500686	6.49690020293839e-22	1.65524350538521e-20
ENSBTAG00000015727	2.82717	0.74786367288324	25.8459113263811	3.69787165783146e-07	1.75191569796379e-06
ENSBTAG00000016401	2.82714	8.17387553651869	334.996689971059	7.84379020913728e-75	6.47173029101588e-72
ENSBTAG00000012066	2.82633	7.73359711725557	146.824465213042	8.57243412263187e-34	6.12986189328996e-32
ENSBTAG00000048253	2.823	-0.774690021030074	35.6312522210188	2.38431511359305e-09	1.52227166121423e-08
ENSBTAG00000047473	2.82113	2.35185630973617	74.3155336772368	6.65775636872277e-18	1.13531152322608e-16
ENSBTAG00000018280	2.81574	3.9568007236344	20.1640685740463	7.10755567381746e-06	2.7197874476406e-05
ENSBTAG00000012442	2.81213	12.5374096781513	205.827773959362	1.11730023730459e-46	1.98864924938008e-44
ENSBTAG00000004305	2.80835	8.00820576279293	98.2371387050491	3.71163220017057e-23	1.06162578610745e-21
ENSBTAG00000016073	2.80264	4.98757262882953	56.1669014074732	6.65728570232245e-14	7.3463010743941e-13
ENSBTAG00000006136	2.80199	7.45986263198711	135.627459714979	2.40709063567131e-31	1.4108444895197e-29
ENSBTAG00000000396	2.79643	8.17185249065045	159.203093104914	1.68952853444039e-36	1.48540025085308e-34
ENSBTAG00000019348	2.79394	6.11369629014146	104.620838770238	1.47893184775878e-24	4.8215875377084e-23
ENSBTAG00000023851	2.7923	1.89187083063212	77.0264814819914	1.68680973783601e-18	3.0407934870637e-17
ENSBTAG00000004177	2.7878	3.35515195158895	96.9497671329212	7.11086906254164e-23	1.99141466226688e-21
ENSBTAG00000017992	2.78026	8.15348501956951	67.586247020403	2.01669400116529e-16	2.94300134102025e-15
ENSBTAG00000012137	2.76906	2.1467516478227	95.2802800126408	1.65251109040602e-22	4.51013586658906e-21
ENSBTAG00000024539	2.76726	7.69909528507015	197.123865903322	8.86116782621675e-45	1.35778408720001e-42
ENSBTAG00000018487	2.76459	-0.333505705894069	22.2581722941766	2.38342217672989e-06	9.82120102481935e-06
ENSBTAG00000040133	2.75833	-0.727255382318879	24.0540887968544	9.36671516435967e-07	4.12258460619294e-06
ENSBTAG00000011337	2.74874	0.791051387183417	36.5004581014512	1.5263037630415e-09	1.00190539549468e-08
ENSBTAG00000005960	2.74564	6.75025676250727	192.005751267264	1.16019408350403e-43	1.68165428914382e-41
ENSBTAG00000013191	2.74252	-0.265228575749298	46.385351715799	9.71390002899538e-12	8.40930522284136e-11
ENSBTAG00000039691	2.74235	2.58022305821697	21.8012081770218	3.02409647346594e-06	1.22679496121013e-05
ENSBTAG00000021240	2.74089	4.0184156710489	26.2298688609871	3.03098006254162e-07	1.45394866506357e-06
ENSBTAG00000005668	2.73633	9.54304291302061	114.039809159217	1.27718472556773e-26	5.09259604700353e-25
ENSBTAG00000031707	2.73442	1.8102237630767	96.8758661929365	7.38129222860183e-23	2.06176407406206e-21
ENSBTAG00000016345	2.73115	3.20579636772097	60.9263208638397	5.9251336194048e-15	7.3217722582645e-14
ENSBTAG00000032068	2.7266	7.09244250445672	18.9268357661415	1.35828486461146e-05	4.9436591305811e-05
ENSBTAG00000007239	2.71044	1.76597393358803	38.3680518020041	5.85836595321759e-10	4.0331728635566e-09
ENSBTAG00000001022	2.70625	4.83182725952062	134.615823850604	4.00653479024804e-31	2.31043506237637e-29
ENSBTAG00000004443	2.70027	-0.461490926533005	20.5339975027584	5.85814762641947e-06	2.27908927968717e-05
ENSBTAG00000010347	2.6953	7.10344391721013	196.837925626871	1.02304372529329e-44	1.54551647852055e-42
ENSBTAG00000032425	2.69341	9.54499619309562	31.6556151128503	1.84081578594469e-08	1.0441348556342e-07
ENSBTAG00000014537	2.67971	0.531840038441391	43.9048186764962	3.44739091896932e-11	2.80978077483776e-10
ENSBTAG00000018807	2.67928	-0.322771005530181	24.5372935221506	7.28853926456072e-07	3.28336296311122e-06
ENSBTAG00000000095	2.67648	8.23823427531776	43.1397664582257	5.09657727775134e-11	4.0373624727593e-10
ENSBTAG00000001945	2.6763	9.68068252482167	284.797655920574	6.76292981617589e-64	2.68663648919639e-61
ENSBTAG00000003709	2.6757	6.36969013739768	158.661505657581	2.21871073269241e-36	1.93478791210234e-34
ENSBTAG00000046671	2.67064	4.58774065697144	77.2093960407959	1.53760302815407e-18	2.78586656756429e-17
ENSBTAG00000004954	2.66705	0.412060290862445	44.0249217640517	3.24221357810437e-11	2.64858970592136e-10
ENSBTAG00000009863	2.66665	9.43801403129346	167.252271548523	2.94663138995411e-38	2.94445809072033e-36
ENSBTAG00000047412	2.66536	1.54055591620267	35.0256546174148	3.25389874563831e-09	2.01975219593267e-08
ENSBTAG00000008193	2.66398	2.71699883420046	118.12962182131	1.62419255943427e-27	6.91313071130635e-26
ENSBTAG00000002596	2.65991	7.65525411130413	142.06041774092	9.43345246529369e-33	6.05887491872695e-31
ENSBTAG00000016513	2.64565	5.87241854703709	94.5090141179581	2.43978840704237e-22	6.50974389401404e-21
ENSBTAG00000020283	2.63525	5.72769777645671	72.1265048934367	2.01834536453305e-17	3.2850944430928e-16
ENSBTAG00000039080	2.62877	1.85729752849559	24.127422921074	9.01670853556739e-07	3.98652991560164e-06
ENSBTAG00000039932	2.6284	4.2513674799333	38.2637988902857	6.17985261647083e-10	4.24434736532771e-09
ENSBTAG00000010976	2.62129	-0.575292311272998	31.6647002401024	1.83222428475913e-08	1.04036197344237e-07
ENSBTAG00000005766	2.62112	3.16661612575494	44.668805304785	2.33345587446892e-11	1.93720183510477e-10
ENSBTAG00000020455	2.61114	4.56516042616788	64.2143899775854	1.11590731812768e-15	1.49242168257326e-14
ENSBTAG00000019029	2.61046	3.55097350445395	67.07842244798	2.6091862025982e-16	3.75652767906957e-15
ENSBTAG00000031962	2.61024	3.88480596237856	91.9142425001764	9.05152182578084e-22	2.27369140757202e-20
ENSBTAG00000038797	2.60933	1.06511154461919	17.7681711483245	2.49522814120753e-05	8.63627526382443e-05
ENSBTAG00000012829	2.60036	4.376078825986	102.781978733921	3.74137496292674e-24	1.16185969929506e-22
ENSBTAG00000006561	2.59137	9.10014421888844	103.483609162026	2.62557349007613e-24	8.28291213369311e-23
ENSBTAG00000026375	2.58559	-0.175245847047565	27.1975088773671	1.83695209967849e-07	9.09655965888803e-07
ENSBTAG00000017074	2.58387	3.38581213630363	89.0056041436096	3.93695654629651e-21	9.36314765312114e-20
ENSBTAG00000006132	2.58087	6.8677200754098	183.243321733084	9.49086290966606e-42	1.22649392251901e-39
ENSBTAG00000035995	2.57412	4.20668964297357	69.565375004127	7.3923270659427e-17	1.14250864710809e-15
ENSBTAG00000047902	2.57211	0.250591923080441	21.8397321196856	2.96398446701463e-06	1.20697408478356e-05
ENSBTAG00000003544	2.56281	2.44131693266031	31.3404700052521	2.16518893423421e-08	1.21718115873146e-07
ENSBTAG00000007520	2.55814	7.1379206525342	157.679431473286	3.636529487668e-36	3.12043322277816e-34
ENSBTAG00000021166	2.55767	3.71808273032635	83.1695299570843	7.5309636774616e-20	1.56544799233436e-18
ENSBTAG00000007836	2.54167	5.62039009223418	139.722686047499	3.0609505259094e-32	1.90882298493629e-30
ENSBTAG00000037651	2.54087	3.38603043065425	16.7218689039502	4.32792271384112e-05	0.000143319848807224
ENSBTAG00000014367	2.54011	5.75223287377933	155.452255247018	1.11522639202128e-35	9.34524865689085e-34
ENSBTAG00000019152	2.53786	-0.89193891304596	20.2064681972868	6.95174813771816e-06	2.66682584138644e-05
ENSBTAG00000013699	2.53537	7.64613922361075	309.464248107401	2.85716259261213e-69	1.53229629841788e-66
ENSBTAG00000015580	2.53481	9.06528473946073	146.461983034251	1.0288352539951e-33	7.11953995764611e-32
ENSBTAG00000005176	2.53062	1.41537446590802	62.6924804936005	2.41636460534181e-15	3.13018439092951e-14
ENSBTAG00000019015	2.52941	5.32798573463467	29.7079154730494	5.02293039052505e-08	2.70733423963677e-07
ENSBTAG00000008545	2.52811	9.67618529743969	142.896300684752	6.19304630162212e-33	4.07525243136189e-31
ENSBTAG00000006721	2.52559	4.57207203705284	168.752987089887	1.38526315461406e-38	1.42868582657601e-36
ENSBTAG00000047345	2.52427	3.82246795982233	94.7814674799952	2.12606790175633e-22	5.74413206907767e-21
ENSBTAG00000011861	2.51757	0.949742241086282	43.6477891132689	3.93120993533308e-11	3.15851369036574e-10
ENSBTAG00000001283	2.51376	7.302834293728	68.8925723034172	1.03975689403443e-16	1.5729805987889e-15
ENSBTAG00000002292	2.51263	1.47987134020897	42.6047459344018	6.69966329655864e-11	5.21484677205283e-10
ENSBTAG00000008330	2.5093	8.21304045248828	301.456917957373	1.5862094701308e-67	7.08903449025957e-65
ENSBTAG00000037634	2.50213	1.46554832150624	39.7428071970675	2.89705579729632e-10	2.10812893363638e-09
ENSBTAG00000038938	2.49897	1.51013679674442	20.8347853901136	5.00653488975658e-06	1.96415849405739e-05
ENSBTAG00000014299	2.49871	6.44066069266174	58.3863208956479	2.15383368495286e-14	2.51108914182657e-13
ENSBTAG00000000720	2.49684	4.94236153094113	10.3592468863662	0.00128827749704175	0.00317802769854412
ENSBTAG00000000859	2.49615	3.10931684978965	45.2414788408707	1.74176732079413e-11	1.46872612286461e-10
ENSBTAG00000048145	2.4955	3.81163389677902	68.2081709273414	1.47114879073657e-16	2.18856337440228e-15
ENSBTAG00000040128	2.494	4.54442852596575	111.879965709519	3.796115166126e-26	1.44900823031557e-24
ENSBTAG00000001294	2.4896	8.85327202263214	206.516659392578	7.90426762532678e-47	1.43696906015687e-44
ENSBTAG00000044082	2.48924	4.37821399590841	35.1285482892277	3.08642689395233e-09	1.92623363195691e-08
ENSBTAG00000026111	2.47461	5.35583469492666	62.2233182335394	3.06635488732918e-15	3.93888892472967e-14
ENSBTAG00000003935	2.47255	9.70302477570599	216.207447968023	6.07670224430557e-49	1.22978694853626e-46
ENSBTAG00000039922	2.46937	2.87244238050547	33.1621500014837	8.47849335860307e-09	5.01324805757313e-08
ENSBTAG00000018424	2.46501	1.95275212768497	34.4455525145796	4.38343255529108e-09	2.68207059829162e-08
ENSBTAG00000026944	2.45958	6.30465746770195	26.8341111526508	2.21689521391694e-07	1.08379298379549e-06
ENSBTAG00000004221	2.45933	-1.67973943384096	5.76070347707326	0.0163885090210969	0.0313171472938332
ENSBTAG00000032089	2.45277	5.08416230862759	137.62132487393	8.81872606388765e-32	5.31402560456511e-30
ENSBTAG00000011997	2.44816	5.193338327414	160.467826997512	8.94200024810555e-37	8.05982308077144e-35
ENSBTAG00000020172	2.44577	2.82999399762562	173.57478344164	1.22586999625195e-39	1.38407174524194e-37
ENSBTAG00000014831	2.44111	9.20428674672805	63.0954364379029	1.9692984143669e-15	2.57280082734462e-14
ENSBTAG00000001890	2.43799	3.44852051368258	59.4130170515654	1.27820787696718e-14	1.51659930180862e-13
ENSBTAG00000009459	2.42651	-0.462481457399394	38.2634572299464	6.18093472370118e-10	4.24434736532771e-09
ENSBTAG00000015505	2.42439	2.78272834687837	49.6246732709792	1.86157773859292e-12	1.76858129531866e-11
ENSBTAG00000005043	2.41837	7.7782439674893	38.7737706181865	4.75879611475029e-10	3.33831570482744e-09
ENSBTAG00000000930	2.41108	1.22704811494596	37.1795885226902	1.07735574156391e-09	7.20431277058259e-09
ENSBTAG00000015844	2.40639	5.61948805242441	11.4032495284026	0.000733157501104005	0.00191427637703056
ENSBTAG00000013860	2.40415	5.03719572719573	75.0268096215237	4.64365418143059e-18	8.02058530596207e-17
ENSBTAG00000007714	2.40341	3.85144893110365	39.6841270196503	2.98542056951837e-10	2.16993699008206e-09
ENSBTAG00000026309	2.39806	5.73262383086752	140.59750952326	1.97039882339711e-32	1.23593554267587e-30
ENSBTAG00000013988	2.39518	3.75024699787092	77.9815630593716	1.04006818402422e-18	1.92856547755873e-17
ENSBTAG00000014435	2.39406	1.22493751270674	24.2404192517142	8.50289902106413e-07	3.77492114652044e-06
ENSBTAG00000009426	2.38812	6.43070616947743	215.713008785316	7.78980734495737e-49	1.5191540651275e-46
ENSBTAG00000044022	2.38736	2.64791825285842	48.8987871110254	2.69517360340021e-12	2.51159270808607e-11
ENSBTAG00000009681	2.38382	5.10637326131381	85.9741283148678	1.82305198679884e-20	4.05685801045733e-19
ENSBTAG00000021658	2.38207	4.19290983620255	142.701009222085	6.83288763906743e-33	4.4417910797962e-31
ENSBTAG00000017363	2.38167	10.9132852520266	205.803573552937	1.13096778120627e-46	1.98864924938008e-44
ENSBTAG00000020214	2.37588	5.00582302753623	49.0085276639146	2.54852100056368e-12	2.38737434515686e-11
ENSBTAG00000016284	2.37431	1.82579466831232	61.0969893418425	5.43311606862287e-15	6.74486145278343e-14
ENSBTAG00000016883	2.3727	2.06366959316187	78.1075159136644	9.75819529493191e-19	1.81397578394176e-17
ENSBTAG00000012508	2.36991	1.78471127473329	68.3295064384026	1.38335468426623e-16	2.06655464393308e-15
ENSBTAG00000011227	2.36168	3.27197832671218	32.8095933220866	1.01641992077126e-08	5.95093890294351e-08
ENSBTAG00000006214	2.35943	-1.65041446640728	6.98422706408835	0.00822311584358232	0.01696175779582
ENSBTAG00000047379	2.35903	11.1367836097656	62.5832832833601	2.55412220010899e-15	3.30066442389988e-14
ENSBTAG00000034138	2.35855	1.67248782877155	30.1519778555833	3.99479573470039e-08	2.17613910870474e-07
ENSBTAG00000012261	2.35325	-0.310862688819086	36.4658420465878	1.55365215665783e-09	1.01923382460623e-08
ENSBTAG00000037452	2.35249	-0.445590542946905	17.3284631693425	3.14441611717317e-05	0.000107069864358093
ENSBTAG00000013371	2.35027	10.5732733857363	94.6208579840796	2.30575902354586e-22	6.19838879362229e-21
ENSBTAG00000018784	2.34833	10.4949915710947	148.973808141434	2.90580070296376e-34	2.16441794027703e-32
ENSBTAG00000015913	2.34593	3.68298603954152	115.50265237237	6.10773050682332e-27	2.49093222114779e-25
ENSBTAG00000031287	2.33844	4.2561779674869	47.5360252198833	5.40023589047639e-12	4.83093662729356e-11
ENSBTAG00000039086	2.33829	3.57086682891941	10.3046392543886	0.00132696190519735	0.00326594616685333
ENSBTAG00000011548	2.33588	0.30673442408806	50.8624120477045	9.90727873072778e-13	9.6051965732406e-12
ENSBTAG00000014553	2.33536	8.0753135797626	231.000737961867	3.60661961417147e-52	8.05929207950066e-50
ENSBTAG00000017718	2.33457	4.67310544290461	17.7997723977815	2.45412598506095e-05	8.5049936399883e-05
ENSBTAG00000007791	2.33407	-0.502539283262331	16.6034460952351	4.60672409937338e-05	0.000152082864542563
ENSBTAG00000022689	2.32833	4.98631395231282	81.8670170069435	1.45558253539416e-19	2.92918916972566e-18
ENSBTAG00000021430	2.32717	2.85572724297133	48.8281172994465	2.79405432848561e-12	2.59247636049625e-11
ENSBTAG00000047958	2.31752	3.8751381933098	50.4790776009044	1.20441993787896e-12	1.16279102193427e-11
ENSBTAG00000024918	2.3129	11.1238954254355	130.547992103923	3.10923383328937e-30	1.64253139707942e-28
ENSBTAG00000046971	2.31131	1.43397186152455	27.6858240620695	1.42704642323608e-07	7.21324219398217e-07
ENSBTAG00000020382	2.30907	7.22525446722804	66.0855063751946	4.31779167428069e-16	6.06980779794688e-15
ENSBTAG00000018723	2.30567	2.57300152147653	111.403522765231	4.82734621407899e-26	1.82011855902258e-24
ENSBTAG00000002164	2.3048	0.421092923923421	54.6454561214286	1.44357706155807e-13	1.53914588094153e-12
ENSBTAG00000018688	2.30295	2.81773403336072	68.0032675645474	1.63224820201126e-16	2.41150058054722e-15
ENSBTAG00000039892	2.30185	5.62570648090738	100.626242361893	1.11086154579302e-23	3.30975026115999e-22
ENSBTAG00000021574	2.29365	3.42556082754285	67.0809882472918	2.60579257433911e-16	3.75652767906957e-15
ENSBTAG00000013863	2.29214	10.2109368745119	249.138596004568	4.0016102723829e-56	1.04686028735558e-53
ENSBTAG00000037937	2.29188	2.91583954528141	31.242519136633	2.27723324331888e-08	1.27815822960954e-07
ENSBTAG00000000546	2.29099	5.71447881549286	51.8929313096869	5.86110386102788e-13	5.81555966821323e-12
ENSBTAG00000016525	2.29064	-1.32357305705648	12.5906286643051	0.000387685719779538	0.00107394551403805
ENSBTAG00000000704	2.28971	6.63752269355679	220.179120224273	8.26633447084023e-50	1.73852359871044e-47
ENSBTAG00000002326	2.28935	9.01600785404635	108.4132417837	2.18195139108785e-25	7.57398401967906e-24
ENSBTAG00000001414	2.28705	1.77913249891703	44.3829287137504	2.70031566319992e-11	2.22625563439526e-10
ENSBTAG00000000203	2.28554	8.72608136829194	225.468326648879	5.80319218013402e-51	1.24490078648235e-48
ENSBTAG00000020837	2.28379	-1.13759395022454	11.8349009144271	0.000581307917669277	0.00154909533538402
ENSBTAG00000010555	2.28091	3.36519384775023	47.1746097436277	6.49361907370267e-12	5.7231354301179e-11
ENSBTAG00000000835	2.28046	-0.0664361447592646	23.2955795998522	1.38918911860451e-06	5.94353509619146e-06
ENSBTAG00000011981	2.27864	-0.614766943538676	30.5002735247403	3.33819438218865e-08	1.83712021258878e-07
ENSBTAG00000000900	2.2774	5.81266073291519	80.189738516644	3.40128986574143e-19	6.60910056158381e-18
ENSBTAG00000014548	2.27529	7.34962850901394	82.4067567114649	1.10774480499088e-19	2.25458648545203e-18
ENSBTAG00000047107	2.26793	7.3162671881341	104.047091294155	1.97564133771928e-24	6.30676457987412e-23
ENSBTAG00000018275	2.26747	1.11871924180204	64.9686868533871	7.60977521777082e-16	1.03581788053058e-14
ENSBTAG00000006616	2.26204	7.84513186852887	132.476702830186	1.17679605357237e-30	6.54005931120066e-29
ENSBTAG00000014147	2.26082	-0.723156455834409	18.0689356980101	2.13049146400216e-05	7.46298218252357e-05
ENSBTAG00000016218	2.25621	-0.742582504311438	22.0918674893662	2.59908516793024e-06	1.06607218016137e-05
ENSBTAG00000001388	2.2522	2.60141564914372	29.7983102638189	4.79409643331449e-08	2.59311539807016e-07
ENSBTAG00000014947	2.25093	2.10759026534473	36.1908167038422	1.78911658882427e-09	1.16373951071735e-08
ENSBTAG00000010303	2.24982	7.38911016425407	77.3462983013204	1.43463345813419e-18	2.61698613468491e-17
ENSBTAG00000018722	2.24444	8.17022155130093	162.214779387225	3.7133496475411e-37	3.43356795857981e-35
ENSBTAG00000013451	2.24162	6.30738284924031	111.941366108847	3.6803519589726e-26	1.40983768256929e-24
ENSBTAG00000017751	2.2354	-1.13333520750171	15.2193267810087	9.5718785595601e-05	0.000297674599680608
ENSBTAG00000021462	2.23386	12.1741478596004	68.5765151582461	1.2204896459027e-16	1.83346945965719e-15
ENSBTAG00000022895	2.23153	3.57881059731314	100.156385798366	1.40826695476455e-23	4.16117668231531e-22
ENSBTAG00000020133	2.231	5.39820360105851	57.6253935671078	3.17105191611579e-14	3.63383577481388e-13
ENSBTAG00000004118	2.22616	7.66075456011052	48.7648330823542	2.88567852489105e-12	2.67286596355626e-11
ENSBTAG00000013981	2.22452	9.63753738997409	121.140513047579	3.56002683689186e-28	1.60440537195387e-26
ENSBTAG00000012626	2.2209	5.61647871336628	65.410610075422	6.08106166595353e-16	8.37297399602279e-15
ENSBTAG00000016805	2.21716	5.19987908393003	72.750893947806	1.47091586339136e-17	2.4160863017972e-16
ENSBTAG00000040585	2.21144	0.815048611724435	60.1832083046393	8.64263717856362e-15	1.04746809465846e-13
ENSBTAG00000005923	2.20291	4.05790361573542	85.5521800010167	2.25667356364885e-20	4.94991424206494e-19
ENSBTAG00000039326	2.20271	4.62125721546673	38.0262903585891	6.97977544079388e-10	4.76544057148028e-09
ENSBTAG00000010238	2.20153	4.47460154145824	73.7931635209315	8.6746517719637e-18	1.46864498186594e-16
ENSBTAG00000000672	2.19935	8.28578318625419	53.7294373518199	2.30089792427241e-13	2.38679217947253e-12
ENSBTAG00000000928	2.19735	4.3719535309334	79.0051156376418	6.19493134016434e-19	1.17190182635984e-17
ENSBTAG00000017855	2.19708	7.09656759928974	45.1912890783344	1.78698165983333e-11	1.50448707090834e-10
ENSBTAG00000003820	2.19493	4.64321829571269	125.790523648813	3.41715357517667e-29	1.64360489898408e-27
ENSBTAG00000046014	2.18845	0.719403256157131	46.741909423006	8.09785654343274e-12	7.07885976241725e-11
ENSBTAG00000002658	2.18594	5.07694133486229	143.387528730081	4.83615688864632e-33	3.2514761201672e-31
ENSBTAG00000002478	2.18593	4.38489234381564	111.304765425308	5.07390814486777e-26	1.90289296370111e-24
ENSBTAG00000002333	2.1842	0.34025437268089	16.1802891936104	5.75902529333566e-05	0.000187052545751725
ENSBTAG00000015646	2.18172	4.75401599958729	77.3324174532941	1.4447515472192e-18	2.62663674068703e-17
ENSBTAG00000015177	2.17902	2.02906377687339	38.9281013252867	4.39705187909806e-10	3.10895045848423e-09
ENSBTAG00000003172	2.17229	2.51778714477902	25.7087401093972	3.9702490612807e-07	1.87186335961744e-06
ENSBTAG00000012854	2.17174	1.10313069557066	50.6999404295809	1.07622827054171e-12	1.041843360093e-11
ENSBTAG00000017721	2.17007	3.96213573918105	147.470354954364	6.1931324438021e-34	4.48834720217711e-32
ENSBTAG00000006777	2.17	1.75913812185223	70.9036813808546	3.75097384848586e-17	5.97814940547688e-16
ENSBTAG00000011344	2.16762	3.36884756134254	51.2662103774313	8.06519800075375e-13	7.90743270165309e-12
ENSBTAG00000015133	2.15929	4.79066724926127	33.2622237595071	8.05319378489336e-09	4.77493402635523e-08
ENSBTAG00000011545	2.15872	3.78382204929798	56.0293737939394	7.13963165789906e-14	7.86239108445845e-13
ENSBTAG00000027879	2.15796	6.27767925717912	107.644156881976	3.21638694802151e-25	1.10220339950411e-23
ENSBTAG00000002416	2.15316	0.493135067337149	17.6732798261652	2.62285288640049e-05	9.04007713995234e-05
ENSBTAG00000004557	2.15089	3.38494892450139	40.7560415787859	1.72469400204543e-10	1.28109888268277e-09
ENSBTAG00000009655	2.14542	4.33773597236635	26.5888561241387	2.51691341268754e-07	1.22045267922634e-06
ENSBTAG00000009211	2.14118	4.56839809778147	84.4270639418886	3.9865324541471e-20	8.5178380683629e-19
ENSBTAG00000019574	2.13829	1.37277842477972	15.0356574840503	0.000105498918525306	0.000325418199522117
ENSBTAG00000006161	2.13692	-1.07387670799627	10.934545336051	0.000943876451974165	0.00240076329710099
ENSBTAG00000020355	2.13084	2.6461990037741	61.7891684305619	3.82271358903327e-15	4.8351917400909e-14
ENSBTAG00000003014	2.12734	5.35392841657915	86.7411305751861	1.2369731162733e-20	2.81693707964914e-19
ENSBTAG00000048226	2.12587	-1.0633662338484	14.4690345112427	0.000142482643312835	0.000428998852769561
ENSBTAG00000038756	2.12542	1.95334499276222	19.9777568495006	7.83482824658416e-06	2.97473868222519e-05
ENSBTAG00000015127	2.12133	8.63946424975248	160.403042456781	9.23823671969552e-37	8.25744392128785e-35
ENSBTAG00000000283	2.12124	0.60258208504822	11.0291888591157	0.00089688383394279	0.00229548910993329
ENSBTAG00000019954	2.11541	6.30755283468269	119.301203676112	8.99753230045232e-28	3.92307038433543e-26
ENSBTAG00000047330	2.11152	5.46560310251746	79.6331380785409	4.50800818549515e-19	8.61905450937985e-18
ENSBTAG00000007523	2.10702	6.94684616835038	123.678136660154	9.90796046692779e-29	4.62055582470728e-27
ENSBTAG00000014653	2.10247	5.64305623907623	170.973260384764	4.53523899027104e-39	5.01494571233476e-37
ENSBTAG00000010665	2.09945	1.19462693637079	36.9737316818964	1.19731480656866e-09	7.97169374007168e-09
ENSBTAG00000007718	2.09685	6.88291552344565	235.731213306547	3.35371190396892e-53	7.81998127868927e-51
ENSBTAG00000031814	2.09681	11.8648057252333	106.975334299773	4.50744618127666e-25	1.52034175284193e-23
ENSBTAG00000015804	2.09585	4.08115044078053	48.9867419485063	2.57698496314155e-12	2.40563452695007e-11
ENSBTAG00000006223	2.09284	6.44368857226643	67.7738047891139	1.83369534165227e-16	2.69427619651538e-15
ENSBTAG00000003880	2.08734	11.4415662440644	103.424693416371	2.70482361883403e-24	8.50789974651431e-23
ENSBTAG00000008998	2.08464	6.09233328046333	111.025666881952	5.84095511686132e-26	2.18292977642699e-24
ENSBTAG00000004005	2.08001	6.97328584488444	67.0787417039975	2.60876370115529e-16	3.75652767906957e-15
ENSBTAG00000009948	2.07134	6.94382881068189	133.026535094511	8.92113940548674e-31	4.98375735746098e-29
ENSBTAG00000008192	2.06996	-0.242512567960473	19.5597126773448	9.75037565225867e-06	3.65035006094682e-05
ENSBTAG00000021713	2.06961	0.384742039055491	36.0848648080749	1.88908412626372e-09	1.2257904620874e-08
ENSBTAG00000004115	2.06614	2.88554641999578	42.7527350544525	6.21149767786734e-11	4.85955682660869e-10
ENSBTAG00000019929	2.06322	6.96863371934087	36.5287601657266	1.50430227507856e-09	9.88067740507819e-09
ENSBTAG00000026148	2.06061	6.39960310226243	85.155182701437	2.75843794955975e-20	5.96512206592295e-19
ENSBTAG00000015543	2.06034	5.65515671609953	46.0346805851793	1.16178060938073e-11	9.99299022952501e-11
ENSBTAG00000014501	2.06016	2.87438382108227	10.8807494558347	0.000971689195050024	0.00246507528526645
ENSBTAG00000012981	2.05131	3.28809270515371	150.471686748371	1.36729201861512e-34	1.04011164479899e-32
ENSBTAG00000003701	2.04947	0.652258810934157	26.1187453476848	3.21051965529349e-07	1.53389905668944e-06
ENSBTAG00000003528	2.04876	5.42864689770539	40.79302163089	1.69236349199107e-10	1.25795501144118e-09
ENSBTAG00000019547	2.03848	0.66545560469715	20.8101240357631	5.0714170752279e-06	1.98743220858219e-05
ENSBTAG00000016991	2.03743	-0.0644906828007298	22.6429089724759	1.9507884864244e-06	8.17988948607822e-06
ENSBTAG00000008063	2.03525	3.24931706997896	48.5451023334629	3.22779419244972e-12	2.97945959623199e-11
ENSBTAG00000009417	2.03474	7.99286290047482	147.618795114807	5.74726730835378e-34	4.19355028227229e-32
ENSBTAG00000005674	2.03278	6.99848858491167	277.933163675944	2.11836816363405e-62	7.57387230771295e-60
ENSBTAG00000046339	2.02995	1.91466993797251	52.5456919802265	4.20353814286885e-13	4.26154538000107e-12
ENSBTAG00000001447	2.02932	3.0608786652387	28.3437316886471	1.01575175147393e-07	5.23544127165275e-07
ENSBTAG00000018981	2.02524	1.07065544448816	64.7195025323729	8.63559019512946e-16	1.16951187415352e-14
ENSBTAG00000019432	2.0223	3.4697095176802	82.7244509765851	9.43271831403742e-20	1.93822483977711e-18
ENSBTAG00000005841	2.02189	6.07322153307972	72.9076382791388	1.35861347278468e-17	2.24192124755207e-16
ENSBTAG00000018785	2.01662	2.41860570188551	87.9459184206871	6.72687816893383e-21	1.56513004858968e-19
ENSBTAG00000036242	2.01146	0.976473007120487	61.3687401130966	4.73265155432025e-15	5.92326961162649e-14
ENSBTAG00000022396	2.01088	13.3332004818492	65.591646078946	5.54734068549792e-16	7.67751950872913e-15
ENSBTAG00000006307	2.00927	4.59435872996059	60.8065427665405	6.29682963505211e-15	7.7583095599861e-14
ENSBTAG00000039618	2.0052	4.39137792068672	38.8687543350766	4.53278106478436e-10	3.19648978966976e-09
ENSBTAG00000022395	2.00503	4.60989573411437	26.4783367874094	2.66510128728397e-07	1.28881318338178e-06
ENSBTAG00000016906	2.00297	8.85073644524791	124.997006260198	5.09715305021861e-29	2.43583742133372e-27
ENSBTAG00000000993	2.00111	5.14520660747762	43.5179657188719	4.20084933727593e-11	3.35754917970355e-10
ENSBTAG00000027513	2.00039	13.7470548618859	38.818750320075	4.65039333274448e-10	3.26440568632312e-09
ENSBTAG00000036016	1.99835	6.67049243579493	36.6811678169609	1.39116884340051e-09	9.16876726338406e-09
ENSBTAG00000037989	1.99273	5.20616374745198	37.52134998447	9.04178243714644e-10	6.1110370775572e-09
ENSBTAG00000038330	1.99254	0.192597015092558	18.1050566971892	2.09045535294631e-05	7.3371152211067e-05
ENSBTAG00000001154	1.99238	0.341359548129414	38.8365674591375	4.60814009968415e-10	3.24110889896473e-09
ENSBTAG00000004476	1.98427	0.835810713646958	23.85267103949	1.03997473578806e-06	4.54369410022923e-06
ENSBTAG00000039129	1.97952	2.42998543370036	63.9011237242836	1.30823008545915e-15	1.73879503056194e-14
ENSBTAG00000007390	1.97597	6.23317358043728	68.9382629902748	1.01594486082395e-16	1.54130474925002e-15
ENSBTAG00000005140	1.97471	-0.110833896006137	22.022745418395	2.6943847589862e-06	1.10347349846834e-05
ENSBTAG00000004540	1.97248	7.15928331636009	48.3039060346824	3.65024387535835e-12	3.33212900485903e-11
ENSBTAG00000019202	1.96389	6.32452221092306	80.8522361321035	2.43242436415448e-19	4.8048220497092e-18
ENSBTAG00000012902	1.95832	6.79194123205018	197.659535092476	6.76999611453525e-45	1.0838056466344e-42
ENSBTAG00000004608	1.95802	1.69515508900153	19.5214544753209	9.94761311095647e-06	3.7177037710146e-05
ENSBTAG00000022920	1.95267	4.37853018087365	86.7845173862409	1.21013192247775e-20	2.76167553202049e-19
ENSBTAG00000009768	1.94625	2.46595923658461	19.6301289806647	9.39755545972747e-06	3.52811270077133e-05
ENSBTAG00000013631	1.94299	10.0053229495313	76.4655112613498	2.24092626295277e-18	4.01942727365074e-17
ENSBTAG00000027337	1.94205	9.43481176850933	82.7011753709085	9.54444785126062e-20	1.95743303351093e-18
ENSBTAG00000048054	1.94075	2.58331337412476	49.7958860157187	1.70601302949366e-12	1.6294475293276e-11
ENSBTAG00000000243	1.9344	0.211900360650595	10.9463057030191	0.000937904292834613	0.00238727134431516
ENSBTAG00000014923	1.93097	4.3003047383776	84.397371417117	4.04685483178129e-20	8.62953577051413e-19
ENSBTAG00000010987	1.92682	9.6308440666928	72.3792259233329	1.77573430627766e-17	2.89460884029395e-16
ENSBTAG00000032503	1.92574	0.114838908444431	38.2614479035909	6.18730250525858e-10	4.24600170642377e-09
ENSBTAG00000005745	1.92363	7.84142711739448	48.4988356615241	3.30485038048551e-12	3.04796433199377e-11
ENSBTAG00000011316	1.92263	6.10131146352698	81.4700717039205	1.77935848746532e-19	3.55407805149963e-18
ENSBTAG00000011156	1.92178	1.90150949526461	30.5612626680555	3.23488502454937e-08	1.78301011168122e-07
ENSBTAG00000019767	1.92122	5.15003553543099	90.1530582681517	2.20430388140639e-21	5.41038064804689e-20
ENSBTAG00000002027	1.92055	0.943651496785182	50.3276829230638	1.30101252644743e-12	1.25378799269319e-11
ENSBTAG00000009455	1.91828	0.985507353930123	24.2553616047891	8.43718914126853e-07	3.75040574924352e-06
ENSBTAG00000013869	1.91372	6.56755938184066	90.6937901992506	1.67718791952695e-21	4.17390200112437e-20
ENSBTAG00000007850	1.9137	1.23602587222929	25.2163822016499	5.12450544044376e-07	2.36448198528512e-06
ENSBTAG00000005030	1.90853	5.0387255254384	190.287956299881	2.7509116822162e-43	3.88240509255934e-41
ENSBTAG00000014401	1.90176	1.6625990081905	27.6443367985147	1.45798293769898e-07	7.34883693127787e-07
ENSBTAG00000038625	1.90012	-1.1818222344201	10.845462713848	0.000990381287318694	0.0025113072547944
ENSBTAG00000017273	1.89957	8.2924960900998	52.164190125685	5.10486220543984e-13	5.10295918131852e-12
ENSBTAG00000031476	1.89838	3.0991727772587	14.1286522589933	0.00017072345101767	0.000506410325114913
ENSBTAG00000011982	1.89061	5.92326241233504	47.7777499410929	4.77379169641901e-12	4.29921828176241e-11
ENSBTAG00000017425	1.88956	5.7089814170887	24.573982670637	7.15107505486377e-07	3.2268586890395e-06
ENSBTAG00000032369	1.88846	6.24573694480126	120.57586413374	4.73220559787668e-28	2.09742302656303e-26
ENSBTAG00000034918	1.88753	2.87510836613921	10.664230949898	0.001092272565845	0.0027411594621557
ENSBTAG00000023629	1.88672	2.52764966561995	80.2820515545334	3.24604220839142e-19	6.31888361655289e-18
ENSBTAG00000015963	1.88489	2.849441441584	64.91104643196	7.83565853218149e-16	1.06386422045796e-14
ENSBTAG00000019274	1.88214	6.33852170551105	26.3328579368624	2.87358048098412e-07	1.38401545752293e-06
ENSBTAG00000009159	1.88003	7.34602373369866	90.5409539368397	1.81187515993947e-21	4.48826165485237e-20
ENSBTAG00000003045	1.87522	0.400433749010525	36.8935535650282	1.24757764065388e-09	8.28576951929007e-09
ENSBTAG00000044063	1.86955	0.807218236100443	39.1832721642967	3.85831770133657e-10	2.75161673301437e-09
ENSBTAG00000017287	1.86836	8.40074910161547	134.233039545364	4.85846348716875e-31	2.77190847677511e-29
ENSBTAG00000046708	1.86815	3.09669132409653	21.9260074971652	2.83367470428408e-06	1.15654470617013e-05
ENSBTAG00000018773	1.86381	4.92201061667118	29.0126992129405	7.19053736568451e-08	3.78067175413392e-07
ENSBTAG00000014922	1.85967	0.883888981836523	30.9575308477409	2.6373673156135e-08	1.46952736765041e-07
ENSBTAG00000017839	1.8582	6.0912681326915	60.4912952521286	7.39045722576484e-15	9.03877356939038e-14
ENSBTAG00000003200	1.85782	3.38962714678334	30.9769618416522	2.61109468818561e-08	1.45791783578755e-07
ENSBTAG00000005439	1.85701	4.05503360141874	54.5630838726779	1.50537058534269e-13	1.603436434795e-12
ENSBTAG00000001497	1.8555	5.99990494398656	36.2493058893116	1.73621837143196e-09	1.13001688422204e-08
ENSBTAG00000003920	1.85473	-0.597098004677697	21.588313690678	3.37904452274135e-06	1.36356777843957e-05
ENSBTAG00000047827	1.85229	6.21109238748253	67.8878675520077	1.73062776352877e-16	2.54982326807824e-15
ENSBTAG00000011894	1.8514	3.98561832271312	71.7704158350397	2.41749710746688e-17	3.91102171563949e-16
ENSBTAG00000000436	1.8513	9.48741925966224	57.5516130586834	3.29225808162802e-14	3.7687043952553e-13
ENSBTAG00000001186	1.84881	2.30158883461823	33.7907174853619	6.13709952958056e-09	3.70644873616447e-08
ENSBTAG00000011358	1.84081	8.59959566670014	66.1415318770694	4.19678841863226e-16	5.90744784491465e-15
ENSBTAG00000031020	1.83893	3.77391881385208	27.1725508470447	1.86081945362214e-07	9.21049813546426e-07
ENSBTAG00000004059	1.83731	9.83722901048866	126.276412614704	2.6750424632072e-29	1.31616997524589e-27
ENSBTAG00000009496	1.83528	5.22949385812327	100.586316801296	1.13348088259687e-23	3.36778835089586e-22
ENSBTAG00000009841	1.83466	9.26367202992819	130.036687545119	4.02273387901608e-30	2.09455551389934e-28
ENSBTAG00000005090	1.83447	9.83430517355281	94.94215309671	1.96030769054183e-22	5.3096616890787e-21
ENSBTAG00000046054	1.83313	6.02805010345264	86.248876261214	1.58657531292282e-20	3.59021240641566e-19
ENSBTAG00000017571	1.83155	2.04909171106947	47.8258737913929	4.65803993098475e-12	4.20556702859785e-11
ENSBTAG00000006896	1.8273	1.85163689044498	8.36587180915307	0.00382333155183389	0.00855960221769365
ENSBTAG00000016711	1.82672	3.39390757172993	68.4850771340583	1.27841379440483e-16	1.91512099983048e-15
ENSBTAG00000014375	1.8257	1.41150934767344	40.898169137908	1.60371310376188e-10	1.1953736449583e-09
ENSBTAG00000010777	1.82474	4.77727495221799	74.9017942363062	4.94720231714705e-18	8.50379680348065e-17
ENSBTAG00000008313	1.82296	-0.0893701861068232	26.9508421984721	2.08696193117226e-07	1.02306918070172e-06
ENSBTAG00000007931	1.82237	4.20620389298242	144.148499987476	3.29703576759759e-33	2.25248443587591e-31
ENSBTAG00000031795	1.81951	0.497274911489438	29.487580851663	5.62761555445317e-08	3.01056381232243e-07
ENSBTAG00000004266	1.81407	-0.247604594733298	21.1317816040922	4.28757966806208e-06	1.7032807229494e-05
ENSBTAG00000019310	1.81334	-0.0377886668251597	33.2393974501119	8.14828170977354e-09	4.82331510038802e-08
ENSBTAG00000007867	1.81307	9.29429147251427	79.5797724655726	4.63142903007264e-19	8.83927184636283e-18
ENSBTAG00000025803	1.81276	-1.30653945710484	8.78450740872269	0.00303799590390853	0.00695974883924026
ENSBTAG00000010433	1.81157	7.53847934294453	12.7286748543027	0.000360091596506141	0.00100294532955722
ENSBTAG00000020350	1.80704	4.4359937150869	41.0904086327591	1.45347852492738e-10	1.08868789513765e-09
ENSBTAG00000025124	1.80492	0.807941944800889	20.2121578438246	6.93110274370202e-06	2.66080916352713e-05
ENSBTAG00000031824	1.80443	4.22752781645182	94.0851781982467	3.02233981859275e-22	8.00434985042613e-21
ENSBTAG00000004425	1.80277	0.221197647784804	22.1339848746731	2.54268294124855e-06	1.04413542219877e-05
ENSBTAG00000037470	1.80124	-0.489880057122638	24.0306465286881	9.48144859518037e-07	4.16966041951229e-06
ENSBTAG00000002554	1.79883	0.847385311475269	36.1050602363788	1.86960720700308e-09	1.2138866163629e-08
ENSBTAG00000005181	1.79882	4.6830392521475	107.267332214262	3.88993785380727e-25	1.31619789968255e-23
ENSBTAG00000004218	1.79235	-0.288020094019267	13.2662528754289	0.000270226798805799	0.000771480607929466
ENSBTAG00000026676	1.79123	2.13068107045063	38.9038346722788	4.45205201383954e-10	3.14576481557595e-09
ENSBTAG00000037830	1.78648	3.22329845863084	14.9232047884092	0.000111977139267688	0.000343652874330535
ENSBTAG00000001788	1.78513	10.9349438580463	93.9551557950455	3.22753918653343e-22	8.48494738106803e-21
ENSBTAG00000014297	1.78305	5.92672386502862	50.2976935341208	1.32104717474035e-12	1.27195260289632e-11
ENSBTAG00000019807	1.77643	1.02547626811123	11.0094976931756	0.000906462075113003	0.00231824325647641
ENSBTAG00000005990	1.77628	2.02987609273973	27.5598490231454	1.52307819873395e-07	7.65177365790181e-07
ENSBTAG00000013405	1.77589	4.28738038594416	90.0130064531568	2.36599497868466e-21	5.76765048667538e-20
ENSBTAG00000023375	1.77535	5.83097747307765	105.520786654657	9.39076294146161e-25	3.09924071723438e-23
ENSBTAG00000017289	1.77174	-0.621448038692524	18.9114589608982	1.36927709798384e-05	4.98028692878084e-05
ENSBTAG00000017763	1.77061	8.28925540873216	148.685810256247	3.3590657336864e-34	2.48478200410485e-32
ENSBTAG00000002660	1.77023	2.72846660636356	73.7917261599009	8.6809707113836e-18	1.46864498186594e-16
ENSBTAG00000009368	1.76982	7.23355538358053	152.494530966237	4.94018916077237e-35	3.92507177321811e-33
ENSBTAG00000015061	1.76898	10.8471383235895	110.11210406848	9.26029029497098e-26	3.34430551191443e-24
ENSBTAG00000011154	1.76756	2.91046572630322	21.0325501735918	4.51546513028107e-06	1.78719110654593e-05
ENSBTAG00000006071	1.76739	4.55094566911372	21.5236055899562	3.49499931377797e-06	1.40718328226661e-05
ENSBTAG00000005160	1.76412	6.677214019015	175.262769829674	5.24595721224078e-40	6.05033731811769e-38
ENSBTAG00000000670	1.761	2.02525538845247	37.3970987914462	9.63653693644375e-10	6.48440998621679e-09
ENSBTAG00000007840	1.7594	8.29070553788776	135.751260175652	2.26159175315053e-31	1.33284797496113e-29
ENSBTAG00000020536	1.75887	6.51732492714167	33.5058089567757	7.10514691573522e-09	4.24330767361781e-08
ENSBTAG00000007758	1.7587	0.880978151922677	7.42694006298195	0.00642545112735004	0.0136096739320609
ENSBTAG00000013057	1.75849	1.27894202086003	27.141138873067	1.89130096630079e-07	9.34843049057247e-07
ENSBTAG00000047567	1.75498	2.66810888935406	56.8799317689027	4.6324915726043e-14	5.19206944699621e-13
ENSBTAG00000015108	1.75268	-0.580074160278258	20.091208599392	7.38352960635723e-06	2.81835368533052e-05
ENSBTAG00000017007	1.75097	3.04357300915452	68.7603495994058	1.11185829722529e-16	1.6749708000054e-15
ENSBTAG00000021521	1.75078	6.45529494378783	108.104960439644	2.54914734849058e-25	8.76351104484294e-24
ENSBTAG00000008649	1.75042	5.51813799128238	26.456409756741	2.6955255271326e-07	1.30235165783893e-06
ENSBTAG00000001778	1.74924	3.505863240951	89.7826882263409	2.65810038024313e-21	6.37825160592568e-20
ENSBTAG00000003952	1.74847	1.32681277190414	44.4016013740242	2.67468225307111e-11	2.20851746315941e-10
ENSBTAG00000000671	1.74838	4.88485294078592	79.859570123104	4.01988480075733e-19	7.74098462709571e-18
ENSBTAG00000021955	1.748	9.85930801255703	120.977447220698	3.86500818976613e-28	1.73456392650341e-26
ENSBTAG00000002774	1.74697	5.48014718966335	67.1484092872793	2.51818408009665e-16	3.64016744516397e-15
ENSBTAG00000018880	1.74609	0.9077996292419	36.0049282616368	1.96819101420785e-09	1.27097030815132e-08
ENSBTAG00000016908	1.74529	5.15428955386273	77.5997537012216	1.26185852616177e-18	2.30574012804278e-17
ENSBTAG00000009020	1.74462	2.93228092356827	37.9062222671269	7.42281220370306e-10	5.04864195922125e-09
ENSBTAG00000002858	1.74459	2.36262689721486	4.99722428692541	0.025388002816933	0.046162352638485
ENSBTAG00000008441	1.74398	5.28644825902105	56.2718581553537	6.31123012540576e-14	6.97878910568063e-13
ENSBTAG00000001246	1.74355	10.1332729228985	128.956307848737	6.93278081266906e-30	3.55794291850184e-28
ENSBTAG00000015046	1.74346	3.4382388893394	25.6344251856288	4.12612299006556e-07	1.93919654104399e-06
ENSBTAG00000018986	1.74261	6.21532974865977	47.5329116444514	5.40881982729451e-12	4.83458345563007e-11
ENSBTAG00000004104	1.74113	1.66416092844535	36.0803709599347	1.89344565376612e-09	1.22713583578824e-08
ENSBTAG00000031231	1.73964	7.7174741606721	78.5588102386254	7.76517463322402e-19	1.45610599853078e-17
ENSBTAG00000003559	1.73806	4.78887330258125	104.248317481598	1.78484510793878e-24	5.73181096639262e-23
ENSBTAG00000018274	1.73544	3.69857910922207	36.0197730938402	1.95325350836136e-09	1.26360658206779e-08
ENSBTAG00000004329	1.73463	2.1886663446669	39.2660102715183	3.69823435751131e-10	2.64448411457776e-09
ENSBTAG00000015512	1.73376	7.79585279757121	170.735055559567	5.11240205204069e-39	5.59547187859065e-37
ENSBTAG00000009602	1.73316	1.76105829062415	56.9733705059615	4.41753293683771e-14	4.97714897904635e-13
ENSBTAG00000043964	1.73312	1.27622495409339	21.1074129556044	4.34245022552863e-06	1.72188987500998e-05
ENSBTAG00000008142	1.73173	6.32085097634145	22.7897265108139	1.80729242665835e-06	7.60196806601468e-06
ENSBTAG00000015490	1.73052	0.58594857777818	38.5689561845287	5.28529319410356e-10	3.685959349802e-09
ENSBTAG00000011446	1.72977	6.08488783023232	105.98616733055	7.42517060118495e-25	2.47336583441956e-23
ENSBTAG00000016217	1.72463	4.19224529396528	45.2529895234067	1.7315601898356e-11	1.4612678675198e-10
ENSBTAG00000017310	1.72329	2.14125794982656	35.9998473362604	1.9733298906392e-09	1.27352204614898e-08
ENSBTAG00000037558	1.72315	14.1741057803808	43.2519688240272	4.81253225718482e-11	3.82931906458193e-10
ENSBTAG00000002922	1.72297	4.38263762995211	89.918669687893	2.48154230049733e-21	6.02195084052815e-20
ENSBTAG00000046672	1.72283	7.08930444765868	160.632798192982	8.22983650964231e-37	7.48078189851046e-35
ENSBTAG00000020661	1.72209	9.01401495000097	27.2736950851381	1.7659762828044e-07	8.76532235509486e-07
ENSBTAG00000014215	1.72112	2.05245348466859	34.3344771914068	4.64087125229108e-09	2.83151223276872e-08
ENSBTAG00000031750	1.71736	2.57993419680084	33.3469619022419	7.709816928376e-09	4.58909524826643e-08
ENSBTAG00000008624	1.71448	6.35732617826572	60.7517237352124	6.47464002404374e-15	7.96410423140976e-14
ENSBTAG00000001505	1.71276	6.36638700949368	101.57396957496	6.88440497679623e-24	2.10376432424833e-22
ENSBTAG00000023028	1.71265	8.59037623053089	110.03703352828	9.61770561258494e-26	3.46172853693242e-24
ENSBTAG00000004855	1.71167	9.05567372925683	56.6007164204808	5.33923862761176e-14	5.94073376761035e-13
ENSBTAG00000022622	1.7106	4.5561037008222	11.379074222407	0.000742761272875282	0.00193539738488298
ENSBTAG00000005414	1.7104	1.81348875610168	54.4251451435673	1.61483279019571e-13	1.70984170855273e-12
ENSBTAG00000014090	1.70429	5.41928199733406	42.4675806332166	7.1863549808484e-11	5.58556837134637e-10
ENSBTAG00000002579	1.7014	5.19145902999617	63.0247166142101	2.04128900162667e-15	2.66360898192795e-14
ENSBTAG00000015195	1.69973	8.40198038656523	153.753985469784	2.62115710745236e-35	2.11387452139354e-33
ENSBTAG00000026497	1.69716	-0.621469854068608	10.1123093028019	0.00147282300138784	0.00358545154627463
ENSBTAG00000005477	1.69609	12.1754327191946	131.72255941088	1.72061199198361e-30	9.36816458173409e-29
ENSBTAG00000011971	1.69444	7.92534632291017	39.3518757898761	3.53912718048872e-10	2.54257723629752e-09
ENSBTAG00000017713	1.69443	7.88782948055759	89.4895247775028	3.08266395662404e-21	7.37824996931383e-20
ENSBTAG00000010517	1.69425	-1.28971688763684	6.80897172767511	0.00907009804199349	0.0185130107703943
ENSBTAG00000003422	1.69418	7.52900682437977	127.594856942766	1.37661621000271e-29	6.96489880589108e-28
ENSBTAG00000002356	1.69405	2.61168940634751	24.3265950626354	8.13086753861059e-07	3.62626549767722e-06
ENSBTAG00000014764	1.6935	5.1330009338213	29.3111294790962	6.16406432836403e-08	3.27630099038814e-07
ENSBTAG00000010107	1.69315	-0.20293091853418	16.4194096171188	5.07627655373459e-05	0.000166304649710926
ENSBTAG00000008485	1.6898	2.22335888612857	57.0051863124392	4.34664103997029e-14	4.90242605622727e-13
ENSBTAG00000018138	1.68947	3.75840521173095	61.4053159402248	4.64554548718593e-15	5.82104216069582e-14
ENSBTAG00000006125	1.68551	6.29246805451801	86.9390617260023	1.11916962717787e-20	2.56500286775852e-19
ENSBTAG00000004549	1.68532	4.63236025181003	66.3850575963579	3.70903166227112e-16	5.26231132401059e-15
ENSBTAG00000007668	1.68398	0.58629802054528	28.7037065536867	8.4342148467348e-08	4.39579146968306e-07
ENSBTAG00000033727	1.67799	6.72678892065105	86.1603449027703	1.65921682829753e-20	3.71539868482658e-19
ENSBTAG00000010549	1.67444	8.56202301676436	56.9201553779571	4.5387019231307e-14	5.09227163467572e-13
ENSBTAG00000018774	1.67124	-0.192480854567614	14.0227412582131	0.000180612993343058	0.000533826113694583
ENSBTAG00000047621	1.66867	0.990091975292439	13.1669595493019	0.000284928672653812	0.000810433556850913
ENSBTAG00000018855	1.66829	6.20978987755084	115.627486977445	5.73510938669065e-27	2.3478924916658e-25
ENSBTAG00000012817	1.66571	9.19520765852802	115.153320339108	7.28422175007458e-27	2.95949100345833e-25
ENSBTAG00000038488	1.66501	11.1998108283882	88.4621459547966	5.18170392164499e-21	1.21883676016588e-19
ENSBTAG00000000521	1.66179	3.34244447330365	17.788829570066	2.46828119796519e-05	8.54852571177739e-05
ENSBTAG00000018488	1.66013	6.26389270627227	107.329178678539	3.77042183625813e-25	1.27979571568686e-23
ENSBTAG00000048184	1.65939	7.46939292867313	24.1265221727244	9.02092702153443e-07	3.98675167832626e-06
ENSBTAG00000009156	1.65738	-0.287305440565519	16.4067226434421	5.1103661646336e-05	0.000167370343456061
ENSBTAG00000011969	1.65642	4.83295002168598	35.3493501830156	2.7556049070302e-09	1.733525996059e-08
ENSBTAG00000024387	1.65484	7.90693514155801	98.10459053364	3.96857782440085e-23	1.13210015277988e-21
ENSBTAG00000012184	1.65395	-0.396871154799513	17.6186113984245	2.69933695117387e-05	9.28578837020234e-05
ENSBTAG00000008468	1.64934	3.60835058758162	57.2307618548258	3.87561638603652e-14	4.41293644974816e-13
ENSBTAG00000021358	1.64658	3.35350332573523	33.3665108578984	7.63270520380394e-09	4.54571882376464e-08
ENSBTAG00000018951	1.64608	9.35418607875623	94.6706403462863	2.24849482819001e-22	6.05963706712716e-21
ENSBTAG00000011614	1.64404	4.32422689709333	43.2371083623704	4.84922207358935e-11	3.85279673787551e-10
ENSBTAG00000015258	1.64315	4.00698134935978	41.102364956084	1.44461432443791e-10	1.08356176530916e-09
ENSBTAG00000045728	1.6426	-0.105918704137744	7.94007989591367	0.00483516997667828	0.0105695117644074
ENSBTAG00000005998	1.64139	6.93350308895958	89.4857177463568	3.08860174922796e-21	7.37824996931383e-20
ENSBTAG00000024815	1.64137	7.0901240349476	84.4557017046574	3.92920508892899e-20	8.41210654368309e-19
ENSBTAG00000014861	1.64007	2.7092021359944	52.5407917258832	4.21403961948337e-13	4.26815759759949e-12
ENSBTAG00000001592	1.63939	7.13131974384575	65.9378549108877	4.65367216856575e-16	6.49093467880835e-15
ENSBTAG00000017812	1.63905	-0.584977057359933	15.03474284802	0.000105550057443357	0.000325418199522117
ENSBTAG00000003081	1.63888	4.22636505272631	96.5746478184147	8.59417239438975e-23	2.38811122026488e-21
ENSBTAG00000006797	1.63716	4.18175883519173	82.5882289159982	1.01057093377253e-19	2.06071936038862e-18
ENSBTAG00000018347	1.63412	0.6069374246282	10.196294636682	0.00140723129227108	0.00344375150374163
ENSBTAG00000020054	1.63402	6.97795588972378	49.0219151421507	2.5311859899511e-12	2.37320812309576e-11
ENSBTAG00000006209	1.63311	6.82397006489809	52.1267336493169	5.20317094921758e-13	5.19638841725398e-12
ENSBTAG00000018334	1.63162	3.38544683471726	21.5238381337647	3.49457553486375e-06	1.40718328226661e-05
ENSBTAG00000002758	1.62626	10.0744266064509	32.55420198915	1.1591424699445e-08	6.74970799816757e-08
ENSBTAG00000016873	1.62579	6.38707616418803	114.196255523234	1.18029109666779e-26	4.74149898983471e-25
ENSBTAG00000017038	1.62214	4.00186513065137	105.404987976648	9.95589593475749e-25	3.26565565126021e-23
ENSBTAG00000027246	1.62089	3.97948271437141	25.182242920714	5.21602514469316e-07	2.40116247647978e-06
ENSBTAG00000032031	1.6208	2.02467211061174	22.0991507503128	2.58924266959544e-06	1.06244134942926e-05
ENSBTAG00000018646	1.61989	8.46795330882503	90.1166668606308	2.24522353283154e-21	5.48902949544786e-20
ENSBTAG00000015086	1.61973	-0.444998646792374	15.851154737469	6.85247090381901e-05	0.000219795463260654
ENSBTAG00000018600	1.61912	1.27562488010988	20.0469772804716	7.5562874289238e-06	2.88019683591459e-05
ENSBTAG00000026369	1.61748	0.62245068886327	24.9501954395771	5.88305662942127e-07	2.6886095188399e-06
ENSBTAG00000004427	1.61361	8.49177149510077	42.4623517702711	7.20559262180463e-11	5.59646534840525e-10
ENSBTAG00000021064	1.61237	6.15983109450236	92.473687553528	6.82258757616838e-22	1.73410128772469e-20
ENSBTAG00000013298	1.61012	4.06549173338301	36.0105246135965	1.96254633927831e-09	1.2680886768132e-08
ENSBTAG00000012599	1.60877	2.18985745018221	39.5696166561671	3.16570428605737e-10	2.28963885180386e-09
ENSBTAG00000018653	1.60586	6.02108996399245	101.406396353085	7.49214665520565e-24	2.26368352179538e-22
ENSBTAG00000018223	1.60581	8.69892922864278	21.3706151691406	3.78528492655982e-06	1.51496142247316e-05
ENSBTAG00000003438	1.6055	4.88025282435085	42.922452537144	5.69532453227433e-11	4.47859610947027e-10
ENSBTAG00000005137	1.60353	6.67016389403153	43.8583954761326	3.5301363808364e-11	2.86731163298773e-10
ENSBTAG00000014970	1.60256	5.90103660930879	139.424259840051	3.55726812138312e-32	2.20550623525753e-30
ENSBTAG00000047008	1.60205	1.7631453709187	17.7501112075271	2.51902768079635e-05	8.71302512229012e-05
ENSBTAG00000003359	1.60116	8.66481634170525	16.8443677298685	4.05735590308565e-05	0.000135026991673896
ENSBTAG00000046383	1.59878	3.92441036894129	7.28325680864113	0.0069600236232834	0.0146149595503793
ENSBTAG00000016609	1.59753	1.42299934536385	42.7863766356734	6.10558854425849e-11	4.78211533708117e-10
ENSBTAG00000046981	1.59729	7.06570546964751	99.6957628054347	1.77701000410867e-23	5.2077074601283e-22
ENSBTAG00000013544	1.59447	6.06865290552526	35.6243145643624	2.3928216709095e-09	1.52679388710145e-08
ENSBTAG00000001441	1.59446	2.87988959554088	26.7543501785169	2.31031043698376e-07	1.12535829914114e-06
ENSBTAG00000020865	1.59334	7.74302203600956	75.6199983387416	3.43861173421631e-18	6.0329536714797e-17
ENSBTAG00000001198	1.59208	-0.200999150671658	12.0666052899918	0.000513330887389224	0.00138335827394543
ENSBTAG00000006013	1.59178	4.41609512151634	53.8896191665983	2.12075235379577e-13	2.20846502396247e-12
ENSBTAG00000027444	1.58833	6.40265667440209	65.7820831596824	5.03640050449541e-16	7.00654109094912e-15
ENSBTAG00000048011	1.58635	-0.557488244031635	16.4325421206814	5.04123062714753e-05	0.000165307978314841
ENSBTAG00000033076	1.58629	6.88381301218508	38.5224757231805	5.41267484349423e-10	3.7625632126584e-09
ENSBTAG00000019554	1.58595	1.2906384304435	5.79436794135407	0.0160775938757048	0.0307953996008712
ENSBTAG00000005124	1.58585	2.12463229493843	36.8566468837717	1.27141887252089e-09	8.42845415739125e-09
ENSBTAG00000009785	1.58393	4.5766340210834	61.738610445745	3.92213645263655e-15	4.9551043098916e-14
ENSBTAG00000017801	1.58347	9.17299577448267	141.598098177018	1.19058462499969e-32	7.55633768505721e-31
ENSBTAG00000006368	1.5825	1.92133437772116	15.3851271887244	8.76756726109801e-05	0.000274893091033432
ENSBTAG00000003499	1.57963	2.9504832485254	10.9261439517645	0.000948166381835804	0.00241053155050269
ENSBTAG00000016533	1.57925	6.8254644258988	169.850142142582	7.97805490657741e-39	8.55726169279493e-37
ENSBTAG00000001085	1.57748	4.88536383962737	38.8691696994508	4.53181668082371e-10	3.19648978966976e-09
ENSBTAG00000016933	1.57507	2.21019152250705	22.7517131201114	1.84339735289781e-06	7.7477586235039e-06
ENSBTAG00000009019	1.5748	6.81486213919594	54.3124709651295	1.71013050784867e-13	1.80362436845475e-12
ENSBTAG00000014091	1.57404	5.22035667480699	25.5193901562489	4.37959268476844e-07	2.0468632303628e-06
ENSBTAG00000039529	1.57095	3.77628122515616	48.7884187483456	2.85118439338321e-12	2.64319825440175e-11
ENSBTAG00000019018	1.57095	3.20703688644175	6.47934267150264	0.0109135336406693	0.0218596754117309
ENSBTAG00000001079	1.57041	2.41367689605711	13.9904282563191	0.000183743650284735	0.000542331973845369
ENSBTAG00000001579	1.57023	6.65401900037058	137.754933737874	8.24489819428881e-32	4.99631514304756e-30
ENSBTAG00000018937	1.56996	7.81807224449975	63.3713436828055	1.71190393747494e-15	2.24747633211214e-14
ENSBTAG00000014261	1.56848	8.80011727321843	86.1947226994647	1.63062230572291e-20	3.66667816586665e-19
ENSBTAG00000017833	1.56695	8.5442235842028	59.3389148726338	1.32725733483205e-14	1.56958789122476e-13
ENSBTAG00000032902	1.56635	0.424963063864208	11.0456029535245	0.000888977865366644	0.00227787304919317
ENSBTAG00000007649	1.56291	2.60579083471332	88.9838885967342	3.98041129077106e-21	9.4455512178784e-20
ENSBTAG00000018189	1.5626	10.9702553657628	90.3856394448223	1.95983441379697e-21	4.8435907655268e-20
ENSBTAG00000021980	1.56039	2.85096770616525	22.2340802590404	2.41351578681251e-06	9.92613892996586e-06
ENSBTAG00000046117	1.56009	4.29437142777737	45.7774944405474	1.32476833428796e-11	1.13313119246991e-10
ENSBTAG00000010923	1.55843	5.95711448700277	130.235150293412	3.63998346132781e-30	1.90451037103425e-28
ENSBTAG00000010059	1.5562	6.46459357504282	121.628515273222	2.78372135905121e-28	1.2651777668298e-26
ENSBTAG00000009343	1.55112	4.594444072311	72.6264358391716	1.56666369038984e-17	2.56550148749945e-16
ENSBTAG00000007512	1.54817	1.75640528959692	45.8100871678369	1.30290898813999e-11	1.11532336845886e-10
ENSBTAG00000019039	1.54441	0.683474192108484	28.2073602282187	1.08989330145204e-07	5.58004560924799e-07
ENSBTAG00000047855	1.5435	4.42592634433476	136.115095316283	1.88293555804565e-31	1.11582136992252e-29
ENSBTAG00000011532	1.54349	5.57347039668258	50.9941840044831	9.26400502180759e-13	9.01685280071763e-12
ENSBTAG00000037383	1.54317	8.29403346216458	60.3147958756645	8.08374706423655e-15	9.85298534215923e-14
ENSBTAG00000009223	1.54245	1.09195235381552	45.3941296756044	1.61116560667639e-11	1.36395913947995e-10
ENSBTAG00000038283	1.53875	6.09919830880857	131.11454203477	2.33723376640873e-30	1.25975725520101e-28
ENSBTAG00000009996	1.53806	5.84240272750583	68.8857384677023	1.04336608086493e-16	1.57621754695172e-15
ENSBTAG00000005028	1.53561	1.64156353674247	47.4114691616634	5.75450083322169e-12	5.11373454325897e-11
ENSBTAG00000020700	1.53328	2.75231154127464	54.0822597740933	1.92269360584467e-13	2.0198640172664e-12
ENSBTAG00000021932	1.52707	8.73924947837638	78.3522586996389	8.62107234004039e-19	1.61096902298385e-17
ENSBTAG00000007139	1.52606	6.70876428637718	152.418340437756	5.13328388209875e-35	4.04850021466112e-33
ENSBTAG00000010351	1.52509	4.17494611107293	41.8341659999522	9.935208571523e-11	7.57930633984038e-10
ENSBTAG00000021435	1.52424	7.43180132787706	72.4977998728615	1.67218271674954e-17	2.72995918110434e-16
ENSBTAG00000002929	1.52295	0.734539041631148	9.44595083580247	0.00211615764747874	0.0050161120280347
ENSBTAG00000046257	1.52119	1.81741163998032	8.68310684534843	0.00321173018020737	0.00730626042691501
ENSBTAG00000010136	1.52011	5.44247430731232	73.0022593388025	1.29501505920361e-17	2.14688277048191e-16
ENSBTAG00000002937	1.51868	0.925838723933149	13.3820462819925	0.000254044410710779	0.0007295529716958
ENSBTAG00000012317	1.51807	10.1463591079413	15.0989636434376	0.000102019280873736	0.000315257506958135
ENSBTAG00000019472	1.51064	5.73248832926048	27.5061160722523	1.56598508452582e-07	7.84528538842782e-07
ENSBTAG00000009167	1.50384	5.52135636730442	89.9511453474903	2.44114133475624e-21	5.93734284730055e-20

## Sheet: DE genes control vs. ST103_down
genes	logFC	logCPM	LR	PValue	FDR
ENSBTAG00000013586	-8.39426	0.119131649136613	70.8345030888989	3.88483232924443e-17	6.17314245384827e-16
ENSBTAG00000039980	-7.31004	-0.0818091641896868	52.4674408051207	4.37440856261128e-13	4.41807026766183e-12
ENSBTAG00000014546	-6.79685	0.571319240394921	53.277967781939	2.89535751025267e-13	2.9689870607046e-12
ENSBTAG00000013664	-6.4864	2.13268058901982	180.074552959608	4.6681241732939e-41	5.75520688307475e-39
ENSBTAG00000030424	-6.45842	0.261376615170441	69.5802006129941	7.33697102693719e-17	1.1355894839095e-15
ENSBTAG00000020433	-6.26158	4.77282554676853	143.376700213774	4.86259323961253e-33	3.2514761201672e-31
ENSBTAG00000002980	-5.96816	1.80953277427448	64.7302780430429	8.5884944729763e-16	1.16460419364278e-14
ENSBTAG00000004150	-5.95412	2.58159852353114	95.7237482455009	1.32086439362026e-22	3.63271576563356e-21
ENSBTAG00000003741	-5.54882	0.919826540279065	183.284819985665	9.29492352741064e-42	1.21582133847569e-39
ENSBTAG00000006539	-5.48596	-1.93881265474549	41.615615854617	1.11102289620054e-10	8.43370954327462e-10
ENSBTAG00000011373	-5.34074	1.8599124371356	108.778755782504	1.81449893024528e-25	6.31893361227625e-24
ENSBTAG00000019669	-5.31625	6.7998063767393	48.9356918680573	2.64493653631619e-12	2.46692080769804e-11
ENSBTAG00000021501	-5.23135	3.26032662190405	181.391347045302	2.40790378435853e-41	3.00315999895693e-39
ENSBTAG00000034323	-5.21886	1.08166922716756	33.6750444794253	6.51309067124938e-09	3.91808247559287e-08
ENSBTAG00000008028	-5.18889	-0.89303048172182	28.2340524323394	1.07496654283487e-07	5.51389741736533e-07
ENSBTAG00000007592	-5.16503	1.70454980040348	150.272670989925	1.51133483335718e-34	1.13360681276847e-32
ENSBTAG00000015596	-5.1299	-1.11891862048322	25.4650127668779	4.50478510145312e-07	2.09806013887044e-06
ENSBTAG00000008497	-5.01729	0.717231065220007	174.416584809586	8.02806242473779e-40	9.16053165614229e-38
ENSBTAG00000019866	-4.94852	4.29384525385812	168.92941613128	1.2676428433592e-38	1.32007156678357e-36
ENSBTAG00000047363	-4.93702	1.39620120491208	51.2701988712258	8.04882810837823e-13	7.89860295429688e-12
ENSBTAG00000021672	-4.90186	6.91257010269297	186.455548847729	1.88818974705662e-42	2.56363585151004e-40
ENSBTAG00000005828	-4.88071	3.93915903960258	150.314253679901	1.4800344360819e-34	1.11794713812778e-32
ENSBTAG00000011324	-4.85735	-1.22525590308895	49.8529212351434	1.65713477667914e-12	1.58417358419434e-11
ENSBTAG00000015888	-4.84178	-1.2543425091284	28.5477113772276	9.14178183509085e-08	4.74152572355824e-07
ENSBTAG00000007302	-4.83347	-0.306825957582569	22.9267542846304	1.68293082856945e-06	7.11233887597947e-06
ENSBTAG00000040427	-4.82076	0.463542680132654	83.8297318412084	5.39276478818304e-20	1.13689291097878e-18
ENSBTAG00000003327	-4.80606	-0.209570282440685	56.4846578523123	5.66385744425071e-14	6.28887525331606e-13
ENSBTAG00000008248	-4.79557	2.10481799047179	104.188407472506	1.83963797347409e-24	5.89013638909942e-23
ENSBTAG00000020070	-4.78542	1.42799498745237	73.4962618745662	1.0082693321416e-17	1.68716019602976e-16
ENSBTAG00000025005	-4.73951	0.251660087769825	51.3380247319455	7.77548721342618e-13	7.64435159039498e-12
ENSBTAG00000002296	-4.69365	5.4240326271576	143.279652569339	5.10606827061336e-33	3.38072149818512e-31
ENSBTAG00000022509	-4.64443	-1.61340221172479	34.9236487242451	3.42890734717454e-09	2.12346767931837e-08
ENSBTAG00000009717	-4.64419	5.55479003899461	77.9644690358947	1.04910797208053e-18	1.94012622560962e-17
ENSBTAG00000001806	-4.64408	-1.2979712054993	49.1629698522254	2.35555721057449e-12	2.21240863753257e-11
ENSBTAG00000019741	-4.61828	1.42944308685121	27.6380731180486	1.46271172709624e-07	7.36920901119504e-07
ENSBTAG00000011102	-4.60591	0.533841011831222	87.515236660008	8.36330440317452e-21	1.93329316871659e-19
ENSBTAG00000000140	-4.57825	0.801170086573437	42.1214011086552	8.57792827557356e-11	6.58132036364821e-10
ENSBTAG00000018920	-4.5584	-1.3925150053328	34.1838657138021	5.01429679096222e-09	3.0489425952302e-08
ENSBTAG00000010888	-4.55115	4.87793030268685	315.610690738291	1.3092066068906e-70	7.80141670306031e-68
ENSBTAG00000047650	-4.53085	-0.870385738037805	26.2503336970889	2.9990299762497e-07	1.44184650494192e-06
ENSBTAG00000007780	-4.48869	-0.66886734855357	41.0021695215499	1.52060329619586e-10	1.13500285003457e-09
ENSBTAG00000013778	-4.45687	-1.6749123060742	23.7286015157241	1.10921791224121e-06	4.83047962919174e-06
ENSBTAG00000013118	-4.35954	7.1077219238332	274.902454593489	9.69338605364177e-62	3.35391157456005e-59
ENSBTAG00000004322	-4.35175	4.68549933179428	99.3466631044564	2.11954688181547e-23	6.17778800390021e-22
ENSBTAG00000034875	-4.34349	2.40882409052275	123.647559774771	1.00618261215282e-28	4.67199770474077e-27
ENSBTAG00000018240	-4.32668	-1.55798167821595	23.2734811654493	1.40524258090401e-06	6.00503263855634e-06
ENSBTAG00000016357	-4.32539	1.75378432700539	22.8402260410005	1.76042286878773e-06	7.42419623043996e-06
ENSBTAG00000019617	-4.32235	2.20671925902276	88.7766244056891	4.42008245762825e-21	1.04197372396749e-19
ENSBTAG00000016498	-4.29661	0.736318057577958	110.800265795051	6.54429347030491e-26	2.4121681018038e-24
ENSBTAG00000021901	-4.26184	-0.599574962644353	67.3898046989031	2.22798110874422e-16	3.23373821006638e-15
ENSBTAG00000006754	-4.24093	-0.498554426391497	42.3575049488821	7.60240461552287e-11	5.87065456487388e-10
ENSBTAG00000003489	-4.20582	0.724822524008091	44.3471277635212	2.75015208240513e-11	2.26386271956082e-10
ENSBTAG00000016255	-4.18646	0.997047540761878	110.320741574235	8.33519239270331e-26	3.03061944420799e-24
ENSBTAG00000007415	-4.12939	3.91321798201645	35.3783455781023	2.714885506978e-09	1.7089120861412e-08
ENSBTAG00000012771	-4.12641	9.05041978033589	339.165182810169	9.69794192601015e-76	9.45637500894408e-73
ENSBTAG00000006592	-4.1251	-1.2864126844707	35.3966733408875	2.68945845050404e-09	1.69537664858205e-08
ENSBTAG00000019066	-4.10754	1.20830356689908	43.8827099198875	3.48655297405684e-11	2.83523633053326e-10
ENSBTAG00000011245	-4.10526	2.23808939767998	76.6426992982598	2.04862006618472e-18	3.68682866273444e-17
ENSBTAG00000000454	-4.07495	-0.245792784122466	66.3498934111095	3.77579292582185e-16	5.34995441510769e-15
ENSBTAG00000008721	-4.06494	4.60509864921444	128.288277935976	9.70687055014494e-30	4.9344025365334e-28
ENSBTAG00000014284	-4.0607	0.393513044846992	69.790936479366	6.59351560988336e-17	1.03093365060654e-15
ENSBTAG00000015321	-3.98277	0.901871615705415	76.0231707899807	2.80355655255601e-18	4.98689014638737e-17
ENSBTAG00000020261	-3.98134	-1.53530825480898	23.0020275474386	1.61830632429259e-06	6.85814051140351e-06
ENSBTAG00000011325	-3.96011	-1.04304130653374	60.6466144933622	6.8297428766982e-15	8.39127400864432e-14
ENSBTAG00000019315	-3.95969	0.257540410707169	32.1739408093437	1.40968871513237e-08	8.11611441680609e-08
ENSBTAG00000015829	-3.95288	0.0718405183734168	34.3155967197434	4.68611223591889e-09	2.85620062599308e-08
ENSBTAG00000022890	-3.94338	-0.216806488922666	46.182582661236	1.07730439071372e-11	9.29619219211215e-11
ENSBTAG00000010663	-3.93613	-0.413030236055054	55.5786148190654	8.97951803147775e-14	9.75828879489669e-13
ENSBTAG00000017393	-3.92214	3.38945778732657	142.851882544166	6.33309786244984e-33	4.14200046784372e-31
ENSBTAG00000010597	-3.92089	2.57096676031605	115.684001971828	5.57397840999927e-27	2.29067020787939e-25
ENSBTAG00000011059	-3.91204	0.407016862378167	65.479458086271	5.87228755504048e-16	8.09590698140928e-15
ENSBTAG00000008682	-3.90877	0.97651218316684	37.6049466702702	8.66245218695879e-10	5.86945433716487e-09
ENSBTAG00000010007	-3.89826	-0.148181904994921	57.7478136538152	2.97971064382251e-14	3.43290830995062e-13
ENSBTAG00000017365	-3.89601	-1.40166628535135	22.8057165201812	1.7923179380561e-06	7.5448988240148e-06
ENSBTAG00000007206	-3.88327	0.211889648810147	43.8500502647779	3.54522045037762e-11	2.87422785719957e-10
ENSBTAG00000014432	-3.85161	4.25730789993322	151.805230487398	6.98866971257986e-35	5.43191821283562e-33
ENSBTAG00000018403	-3.82197	2.51817671776994	166.779022789473	3.73851060106385e-38	3.64538770063735e-36
ENSBTAG00000034193	-3.81584	-0.747046101192251	59.6808517630356	1.11556675717623e-14	1.33395418477952e-13
ENSBTAG00000009513	-3.81236	9.73574697937402	59.9632650414288	9.66444424963942e-15	1.1647284159734e-13
ENSBTAG00000001097	-3.76908	-0.088476360799512	82.8708233142507	8.75946121305416e-20	1.8137834164328e-18
ENSBTAG00000040607	-3.76776	1.26344713866988	79.7662936462891	4.2142094894192e-19	8.10064712966134e-18
ENSBTAG00000002951	-3.74448	0.943917221433558	69.0210955783706	9.74158395921427e-17	1.48000325136731e-15
ENSBTAG00000003946	-3.7004	-0.200350029875157	45.9923999392461	1.18712629190109e-11	1.01946490047487e-10
ENSBTAG00000039731	-3.67374	1.5755890243631	45.1738119255579	1.8030004842648e-11	1.51678299562543e-10
ENSBTAG00000002006	-3.65736	14.2241967874503	169.083985464258	1.17283330661129e-38	1.23331471046203e-36
ENSBTAG00000006039	-3.64652	5.92618113546438	197.565631686342	7.09710862217676e-45	1.11946451590394e-42
ENSBTAG00000000032	-3.64299	0.183318585090165	59.5695760126581	1.18046050794066e-14	1.40372720711436e-13
ENSBTAG00000000962	-3.64215	2.82353916488668	121.283777002496	3.31200754145394e-28	1.49892797002679e-26
ENSBTAG00000022039	-3.6271	3.78239410362731	110.32796261799	8.30488518520837e-26	3.02987069716139e-24
ENSBTAG00000017775	-3.59921	1.4605967854231	127.31521868995	1.58491063706555e-29	7.94380910895567e-28
ENSBTAG00000001066	-3.58632	7.57329233128665	138.481339115496	5.71902896902492e-32	3.50527455552921e-30
ENSBTAG00000017741	-3.5779	2.07972226154344	48.999067978767	2.56084162747648e-12	2.3968226262053e-11
ENSBTAG00000034246	-3.56979	0.175018152638694	68.6384823716035	1.18273459479166e-16	1.77924421651267e-15
ENSBTAG00000005029	-3.54684	0.220327429777489	74.7237179064643	5.41417580702548e-18	9.27674915433791e-17
ENSBTAG00000008611	-3.54655	1.31157453811313	93.4605188795388	4.1438452437317e-22	1.08407034351869e-20
ENSBTAG00000021880	-3.54547	0.767632203835486	64.426090473903	1.00222194535983e-15	1.34709681527939e-14
ENSBTAG00000030518	-3.53729	0.405821621211561	36.9979001714071	1.1825653207447e-09	7.88591126629722e-09
ENSBTAG00000018077	-3.53646	0.752079478176175	73.3962000344283	1.06070103184308e-17	1.76937469168722e-16
ENSBTAG00000038415	-3.52596	-1.27176124004088	16.4944883206053	4.87917048895075e-05	0.000160386094589291
ENSBTAG00000005917	-3.51921	-0.824513713731207	49.3728162826658	2.11658349530994e-12	2.00551895500835e-11
ENSBTAG00000032905	-3.50875	3.32946819669723	215.994994105373	6.76103645202181e-49	1.34294216637752e-46
ENSBTAG00000000277	-3.4934	1.45631222960267	154.692130319983	1.63483214090964e-35	1.34886227256899e-33
ENSBTAG00000011017	-3.48277	-1.22656331998805	46.7185352282283	8.19502191922404e-12	7.15214036660675e-11
ENSBTAG00000007268	-3.48254	9.86302060759746	120.540483133704	4.81736112060404e-28	2.12637923372835e-26
ENSBTAG00000014103	-3.47428	-0.989483257327404	31.8474798918859	1.66765902851321e-08	9.49936842264084e-08
ENSBTAG00000020605	-3.4662	2.89903198008532	37.2549402298143	1.03652081445761e-09	6.94423626225633e-09
ENSBTAG00000020453	-3.46484	2.08674091802179	55.3207781317827	1.02380621223799e-13	1.10476312197834e-12
ENSBTAG00000030845	-3.45943	9.75567261096503	72.0614179644747	2.08602675851208e-17	3.39010954724251e-16
ENSBTAG00000005091	-3.43251	-0.628101302379415	55.9342726502655	7.49347925067135e-14	8.2351494306046e-13
ENSBTAG00000001462	-3.42952	1.7891423876243	35.1204883073149	3.09922798591812e-09	1.93156998122939e-08
ENSBTAG00000004613	-3.39931	2.8688181524951	108.276715975782	2.33754547815186e-25	8.08790735440542e-24
ENSBTAG00000008436	-3.3871	1.74307259171694	98.4456191565183	3.34073904348587e-23	9.58095373808275e-22
ENSBTAG00000032084	-3.38407	5.88910450657735	45.2687769865377	1.71765790571536e-11	1.45067706273251e-10
ENSBTAG00000016260	-3.35824	4.1308539090244	56.3473823142403	6.07340773756495e-14	6.7296871273886e-13
ENSBTAG00000007235	-3.35455	-1.12303747254947	18.7217093009937	1.51250674164356e-05	5.45315875995589e-05
ENSBTAG00000003936	-3.34831	4.49275958056572	151.84521353956	6.84945238008512e-35	5.36257125757613e-33
ENSBTAG00000010738	-3.34122	-0.870779686834948	22.4682527749158	2.13645600989351e-06	8.89236599228476e-06
ENSBTAG00000001021	-3.33843	-0.460261097638344	50.9226946644918	9.60762851117872e-13	9.32592067066995e-12
ENSBTAG00000026779	-3.31292	6.64815504398876	37.9804666551671	7.14564640799118e-10	4.87248591049672e-09
ENSBTAG00000020699	-3.30459	3.53253808862789	48.4314142536447	3.42044735999581e-12	3.13838480610052e-11
ENSBTAG00000008431	-3.28792	1.78780120894678	108.861517523031	1.7402954666781e-25	6.10013371751283e-24
ENSBTAG00000031178	-3.2871	3.90583586881985	48.6991901766758	2.98389608460956e-12	2.76145551367749e-11
ENSBTAG00000021263	-3.25996	3.57181763740477	38.1706497182895	6.48201198649005e-10	4.43972289700462e-09
ENSBTAG00000014713	-3.25279	3.83481602139763	29.6000144592727	5.31045427741845e-08	2.85084747645597e-07
ENSBTAG00000032558	-3.2431	1.66999520639424	113.538116934374	1.64488698070524e-26	6.43907217337389e-25
ENSBTAG00000031503	-3.24196	-0.997208582907716	16.6509267195633	4.49283530728517e-05	0.000148597445285047
ENSBTAG00000007409	-3.23717	3.32022644273304	87.9936078408349	6.56663313777361e-21	1.53116754425565e-19
ENSBTAG00000003334	-3.2222	3.21366229309706	39.9878800271486	2.55543530318899e-10	1.86968615702627e-09
ENSBTAG00000011034	-3.21494	-0.60222364686102	9.62774766546589	0.00191659502660875	0.00458870496772443
ENSBTAG00000015326	-3.20632	6.52839414182936	110.925032851943	6.14511174313325e-26	2.28070825456219e-24
ENSBTAG00000019251	-3.1653	3.5365407257627	58.713151649069	1.82418080828242e-14	2.13371465099643e-13
ENSBTAG00000007353	-3.16502	-1.53027438601765	31.5050268320902	1.98924616321039e-08	1.12298180771551e-07
ENSBTAG00000010033	-3.14404	0.312026030772751	47.7049879048069	4.95429531853257e-12	4.45056713455447e-11
ENSBTAG00000005496	-3.14378	5.17400535043782	245.792754829754	2.14628639891845e-55	5.35373672437193e-53
ENSBTAG00000008744	-3.13863	1.55561324995046	69.4703158360275	7.7573243838975e-17	1.19375984708299e-15
ENSBTAG00000023283	-3.13123	4.77724743169805	53.9225682844263	2.08548438061826e-13	2.1738489277465e-12
ENSBTAG00000002473	-3.1281	-0.567343664078235	20.5011476509166	5.95955081424237e-06	2.31601963889723e-05
ENSBTAG00000038131	-3.12708	-1.41793196178193	36.0384774426229	1.93459390846525e-09	1.25229054086894e-08
ENSBTAG00000014151	-3.12085	4.67781802588318	158.542508543758	2.35559980378557e-36	2.03759383027452e-34
ENSBTAG00000044010	-3.11918	6.79073232218918	80.6756137881016	2.65984412751306e-19	5.21562853961702e-18
ENSBTAG00000008479	-3.1016	2.42618833466807	10.9013409985372	0.000960946677628115	0.00243955362467199
ENSBTAG00000010835	-3.08869	1.87662171209331	177.021258846656	2.16685461545805e-40	2.5540310555388e-38
ENSBTAG00000000684	-3.07854	-0.284767762050089	37.1064634515106	1.11852354149659e-09	7.47494299445013e-09
ENSBTAG00000021809	-3.07816	2.05328185855841	47.7917536288045	4.73981495447976e-12	4.27220631947479e-11
ENSBTAG00000013167	-3.07523	-1.33529870487211	31.7724789350415	1.73331481894296e-08	9.85765363095556e-08
ENSBTAG00000020783	-3.07048	5.51637673752326	242.042821268332	1.41022044172226e-54	3.3613387684251e-52
ENSBTAG00000000313	-3.06881	-1.12970892799275	24.8914015491351	6.06523449970774e-07	2.76664243554566e-06
ENSBTAG00000004879	-3.0671	2.42242684774856	109.049210415207	1.58306408313884e-25	5.56719519860565e-24
ENSBTAG00000038490	-3.06319	4.80480320504757	87.0644934043452	1.05039470351039e-20	2.41463025266266e-19
ENSBTAG00000023610	-3.05647	3.30497166461482	133.668245307584	6.45720918290132e-31	3.62617935580103e-29
ENSBTAG00000013201	-3.05431	-1.54963963033956	17.8733761344975	2.36101116615024e-05	8.20881872548702e-05
ENSBTAG00000015381	-3.05139	1.01454406435566	67.4977657245342	2.10925983514502e-16	3.06557195010372e-15
ENSBTAG00000000333	-3.04495	0.913201175950782	29.6770040427303	5.10366783401461e-08	2.74808941705024e-07
ENSBTAG00000022238	-3.03971	0.0517633359024054	60.2219683523712	8.47411081048049e-15	1.03053642350582e-13
ENSBTAG00000019354	-3.03548	-1.13534601330671	28.0140052459873	1.20440617954996e-07	6.14579480582914e-07
ENSBTAG00000007773	-3.03459	-1.7252235364106	11.7586317660063	0.000605617279356314	0.00160748600306256
ENSBTAG00000015426	-3.03429	0.219157314479063	19.794124474451	8.62473919961976e-06	3.25277611304928e-05
ENSBTAG00000008541	-3.03122	2.03403593352798	30.5383443702572	3.27332518634763e-08	1.80234527457724e-07
ENSBTAG00000003358	-3.02503	4.79342071245322	218.142321021654	2.29931457223438e-49	4.74277848111269e-47
ENSBTAG00000039050	-3.02395	-0.281208736192586	58.0952666050478	2.49726462112699e-14	2.8863858110138e-13
ENSBTAG00000003176	-3.01979	6.34374318805812	164.842770506417	9.90048599980272e-38	9.39757635698088e-36
ENSBTAG00000027684	-3.0183	0.446142906815401	29.2923298619969	6.22415739974174e-08	3.30496595394208e-07
ENSBTAG00000032899	-3.01081	-1.55475655049795	10.9047389117391	0.000959185579466444	0.0024356592152834
ENSBTAG00000007624	-3.00727	4.5914979459556	114.123287238744	1.22453289662449e-26	4.90087307805757e-25
ENSBTAG00000047739	-2.99308	7.1521146556815	143.52946463325	4.50264227689172e-33	3.05666715581903e-31
ENSBTAG00000007193	-2.989	1.28661494487165	55.5318699609501	9.19560273941881e-14	9.9829994922071e-13
ENSBTAG00000011397	-2.96949	0.748171190563026	77.9796830477695	1.04105856004709e-18	1.92856547755873e-17
ENSBTAG00000013856	-2.96187	0.912701672652553	56.9569658621964	4.45453656749922e-14	5.00307426418813e-13
ENSBTAG00000037649	-2.96036	-1.24099898451636	21.4585049347639	3.61568736668891e-06	1.45141701703238e-05
ENSBTAG00000021205	-2.95165	-0.139595961167332	61.9609441694108	3.50337292420234e-15	4.46284774168579e-14
ENSBTAG00000012451	-2.94809	3.33707698257683	66.0802122154035	4.32940488372689e-16	6.07816711817468e-15
ENSBTAG00000001576	-2.94784	0.547511293140676	35.3961211700093	2.69022101052270e-09	1.69537664858205e-08
ENSBTAG00000022000	-2.94433	-0.309148155868519	15.6069421311201	7.79678134309196e-05	0.000247347757131039
ENSBTAG00000014069	-2.93581	4.76027907074386	59.6033963702012	1.16034742472117e-14	1.38134145144942e-13
ENSBTAG00000002490	-2.93407	4.80117380119642	74.7486235297414	5.34630364689088e-18	9.17511246664825e-17
ENSBTAG00000011838	-2.92412	-0.887461407564333	31.3095908015559	2.19990184924471e-08	1.23540037879575e-07
ENSBTAG00000016359	-2.91617	-1.3333930754836	20.1104918821634	7.30945974816842e-06	2.79122512470428e-05
ENSBTAG00000009982	-2.91577	-1.04833170328235	21.8996816211176	2.87281582193956e-06	1.17162823217201e-05
ENSBTAG00000003598	-2.90817	-1.43641979997965	20.1481506914104	7.16695064576586e-06	2.7415375401742e-05
ENSBTAG00000009576	-2.88913	-1.11389469565496	25.8734575592696	3.64547479861969e-07	1.73014879159269e-06
ENSBTAG00000044079	-2.8869	2.08822631412958	86.2373721539796	1.59583177203021e-20	3.60107771769768e-19
ENSBTAG00000020654	-2.87857	1.76928724109893	39.6469400025015	3.04281109224037e-10	2.20819971416578e-09
ENSBTAG00000018975	-2.87577	4.81054100607698	85.1618453435662	2.7491588388312e-20	5.9570662030916e-19
ENSBTAG00000014615	-2.87137	3.49206051318601	59.4147571023859	1.27707816851933e-14	1.51659930180862e-13
ENSBTAG00000010464	-2.8634	-0.806446239841935	21.2421469198606	4.04765320764103e-06	1.61574723874796e-05
ENSBTAG00000018035	-2.83976	4.41415646950522	74.6616217245617	5.58717605366855e-18	9.55790276740811e-17
ENSBTAG00000021696	-2.83312	-0.864831810639478	43.8361862944659	3.57042249112366e-11	2.89029068979565e-10
ENSBTAG00000004066	-2.83242	4.25843688724014	93.205811176266	4.71295327614611e-22	1.22104195265563e-20
ENSBTAG00000021636	-2.8199	2.11929341158035	60.1085838393112	8.97660064713179e-15	1.08671578488866e-13
ENSBTAG00000015739	-2.81513	2.50012573073314	31.1042996765039	2.44529136222264e-08	1.36818962708399e-07
ENSBTAG00000047088	-2.81222	-0.831442653049002	18.5410867701563	1.66280961569904e-05	5.93323218163269e-05
ENSBTAG00000006771	-2.80875	2.17653354304955	116.351421994135	3.98114807966848e-27	1.66154841644063e-25
ENSBTAG00000011936	-2.80642	1.88226869628377	23.4956323105781	1.25197665017363e-06	5.38656299629458e-06
ENSBTAG00000045565	-2.80161	0.000825463103750963	53.3801742995941	2.74856797772832e-13	2.82928408148887e-12
ENSBTAG00000005976	-2.79661	6.55026315150956	144.866697639429	2.29669988276187e-33	1.57912839375024e-31
ENSBTAG00000016096	-2.79565	0.446218962341037	28.0036344739422	1.21087814689355e-07	6.17588159941997e-07
ENSBTAG00000021680	-2.79128	1.28850455171752	135.090307146767	3.15488166839344e-31	1.82914923109125e-29
ENSBTAG00000007428	-2.78154	-1.53069903527629	27.6028436870166	1.4895961031361e-07	7.49058031047247e-07
ENSBTAG00000011590	-2.76478	6.23736879420808	61.3078756600929	4.88123858012592e-15	6.10211713408282e-14
ENSBTAG00000020990	-2.75632	-0.0670864430275854	25.8204110934173	3.74704943986203e-07	1.77364749743866e-06
ENSBTAG00000014465	-2.75505	3.91279124615806	135.333723188742	2.79087645451156e-31	1.62689895929842e-29
ENSBTAG00000005286	-2.75281	-0.85456735828385	27.2512837186646	1.78656473703297e-07	8.86341043913766e-07
ENSBTAG00000014782	-2.7501	3.5476360485979	34.3665266871685	4.56507409275673e-09	2.78685171991512e-08
ENSBTAG00000021830	-2.74422	1.51139991441322	57.6661529771075	3.10601777864302e-14	3.56693219418898e-13
ENSBTAG00000012200	-2.7422	1.34477241625669	61.4744083578744	4.48535338340926e-15	5.63347779747631e-14
ENSBTAG00000016504	-2.74204	-0.142651252138445	32.3935734057802	1.25902162822764e-08	7.29960323479439e-08
ENSBTAG00000008884	-2.74194	0.657814138948816	76.3992359831493	2.31740915492974e-18	4.14967121799272e-17
ENSBTAG00000047605	-2.73022	2.94761058240334	41.0267012232894	1.50163620410419e-10	1.12162603936083e-09
ENSBTAG00000008792	-2.73006	2.42525401020601	51.7227413507863	6.39180959794231e-13	6.33628001363486e-12
ENSBTAG00000006792	-2.72524	4.92600032614257	119.04816211023	1.02217281315196e-27	4.40314280878228e-26
ENSBTAG00000018137	-2.71739	0.383258649883914	27.5932250265465	1.49702200181696e-07	7.52439456021025e-07
ENSBTAG00000010841	-2.71017	0.42658796051313	48.259128412598	3.73455635104531e-12	3.40041183542547e-11
ENSBTAG00000014958	-2.70225	4.48363003167753	69.8535815579773	6.38740163129802e-17	1.00016452404821e-15
ENSBTAG00000020872	-2.7017	6.93865246634932	208.241772225649	3.32252899699013e-47	6.14438724512348e-45
ENSBTAG00000006036	-2.69956	-1.13805595822816	27.6584938726875	1.44735136978456e-07	7.30211231999493e-07
ENSBTAG00000006572	-2.69805	1.64726527510808	59.0711108342123	1.52075618647956e-14	1.78855601493199e-13
ENSBTAG00000002243	-2.69629	1.2823254469461	85.9808850316361	1.81683363611694e-20	4.05142569251359e-19
ENSBTAG00000013192	-2.69279	2.16084319493367	122.65605415867	1.65844278392352e-28	7.66743849153605e-27
ENSBTAG00000018269	-2.69092	2.37667547583605	131.787213802759	1.66547617380337e-30	9.11423338786474e-29
ENSBTAG00000006139	-2.67303	-2.02921946700418	9.20877209337836	0.00240858191256693	0.00564810878753671
ENSBTAG00000000279	-2.66271	-1.29706194284797	21.1284061854899	4.29513833933626e-06	1.70565175222957e-05
ENSBTAG00000014603	-2.66002	0.622390833983054	66.3992454020583	3.68243082254134e-16	5.23149046391767e-15
ENSBTAG00000001408	-2.65554	0.512364806723486	43.7542689069256	3.72303555663731e-11	3.00702404973583e-10
ENSBTAG00000008329	-2.65033	6.45942963392162	94.5311006675107	2.41271714340537e-22	6.45356710228579e-21
ENSBTAG00000015296	-2.64644	-1.87471218444421	9.56356732681525	0.00198477036089151	0.00473818092386431
ENSBTAG00000021177	-2.64424	-1.59253148829108	14.280467314632	0.000157490687740397	0.000469756706536011
ENSBTAG00000008613	-2.63645	0.909325820750477	55.3328527818295	1.01753643459733e-13	1.10021126990836e-12
ENSBTAG00000004542	-2.63202	3.46999065087786	143.36937904591	4.88054871664105e-33	3.2514761201672e-31
ENSBTAG00000004394	-2.62689	7.20168103369702	124.080426839989	8.08972652941023e-29	3.78910073163555e-27
ENSBTAG00000021318	-2.6235	6.63875545196173	81.2760919308847	1.96286876802686e-19	3.9060724315132e-18
ENSBTAG00000008530	-2.6226	1.94954597757125	93.2311249758478	4.65305887376357e-22	1.21137644368903e-20
ENSBTAG00000002783	-2.62166	1.95222636336103	71.2039451526912	3.22143319641647e-17	5.15717797981538e-16
ENSBTAG00000006645	-2.62083	3.10963238347255	62.0300080837546	3.38263131663514e-15	4.31929803597959e-14
ENSBTAG00000013686	-2.61765	-0.885217868253937	18.360364644431	1.82821724746519e-05	6.48246551944187e-05
ENSBTAG00000015160	-2.61705	-0.0495395114272387	19.9574714728969	7.91839235641826e-06	3.00433945578147e-05
ENSBTAG00000000181	-2.61669	-0.266962814528127	36.1412798435118	1.83517852148461e-09	1.19225468330975e-08
ENSBTAG00000022564	-2.61329	-1.75090322897743	10.2730085717634	0.00134990497740583	0.00331784619332148
ENSBTAG00000023073	-2.60365	1.25018498736579	61.8015900983336	3.79867457867351e-15	4.81045850423283e-14
ENSBTAG00000000539	-2.6021	0.32118462773715	46.5047747251196	9.13954775040158e-12	7.94414823102167e-11
ENSBTAG00000013910	-2.60197	2.18283608222318	127.341543782362	1.56402662833933e-29	7.8759387866515e-28
ENSBTAG00000012815	-2.59872	6.76424901170261	74.1649602367279	7.18544692605929e-18	1.22141210346929e-16
ENSBTAG00000014906	-2.59472	8.38350291405131	90.1154700533362	2.24658208885103e-21	5.48902949544786e-20
ENSBTAG00000016548	-2.59423	1.60732570651987	52.3427316739468	4.66120571015293e-13	4.69446877437561e-12
ENSBTAG00000047502	-2.58543	4.94739170921791	179.31320654464	6.84505183541875e-41	8.2494411221013e-39
ENSBTAG00000007644	-2.58107	3.43666484118411	111.506534369373	4.58292251322195e-26	1.73697621472857e-24
ENSBTAG00000016676	-2.57583	0.0354388658238805	18.8308008141757	1.42841669517656e-05	5.17782949390464e-05
ENSBTAG00000003326	-2.56732	7.37813609441902	64.970638777977	7.60224105868087e-16	1.03581788053058e-14
ENSBTAG00000039340	-2.56507	-0.0607137729356849	21.6660076940132	3.24490722711954e-06	1.31240101501072e-05
ENSBTAG00000012052	-2.56474	2.57372100678908	36.8787750102604	1.25707018254828e-09	8.34364775867134e-09
ENSBTAG00000011934	-2.56153	0.631499246708216	41.0866794799104	1.45625437473047e-10	1.09000589137188e-09
ENSBTAG00000006859	-2.5583	2.55988425398652	95.04216235919	1.86373203483722e-22	5.06085817864911e-21
ENSBTAG00000012741	-2.54483	3.80966609109145	39.0088525675954	4.21888114050695e-10	2.98888501407381e-09
ENSBTAG00000007116	-2.54389	5.49499558521195	92.9443178118894	5.37865036301537e-22	1.38348690152765e-20
ENSBTAG00000009107	-2.54074	-0.918926281194833	27.3780766165886	1.67317393132861e-07	8.32782533059426e-07
ENSBTAG00000018157	-2.53492	0.249153323796654	73.7422147821076	8.9014670535151e-18	1.49885613211936e-16
ENSBTAG00000013953	-2.53294	1.60424115378334	77.0813400849107	1.64060065914158e-18	2.96247182995834e-17
ENSBTAG00000002853	-2.52695	-1.451692718482	10.098138109378	0.00148419202565622	0.0036098511716981
ENSBTAG00000006157	-2.52582	-0.578119945164089	38.5694236608297	5.28402741993168e-10	3.685959349802e-09
ENSBTAG00000011892	-2.51701	1.10849109394162	56.0262433582117	7.15100869138544e-14	7.86684299731284e-13
ENSBTAG00000019090	-2.51461	-1.3874742960433	15.1470527215133	9.94534389062611e-05	0.000308305660609409
ENSBTAG00000019321	-2.51397	-0.34157499505641	44.1934908143498	2.97468794180245e-11	2.43747157095287e-10
ENSBTAG00000023144	-2.51199	7.661991309598	46.8373356008421	7.71299155700248e-12	6.76447648735966e-11
ENSBTAG00000009353	-2.49791	8.15330082051892	129.65045033499	4.8868385953225e-30	2.53218506151832e-28
ENSBTAG00000013196	-2.49506	5.50250118264075	163.683985824622	1.77336102484151e-37	1.66851494319737e-35
ENSBTAG00000005018	-2.48888	3.39670147861454	80.4219211348497	3.02421560323086e-19	5.90851303465469e-18
ENSBTAG00000001257	-2.48385	0.938372428234878	79.4221897822597	5.0159577845217e-19	9.52232976934156e-18
ENSBTAG00000015341	-2.48209	0.0194231778662543	23.4898013836029	1.25577681617452e-06	5.39858201614745e-06
ENSBTAG00000011307	-2.48188	-0.0816538742536778	27.4459643770811	1.61545625238827e-07	8.08557338456211e-07
ENSBTAG00000006156	-2.48014	1.80012894765992	34.4167881976917	4.44869428228825e-09	2.71735164418131e-08
ENSBTAG00000007578	-2.47948	5.13940892129344	119.292203742357	9.03844757448516e-28	3.92495500744647e-26
ENSBTAG00000001110	-2.47757	1.14627526132322	60.211811694682	8.51795082362412e-15	1.03469468328644e-13
ENSBTAG00000006790	-2.47735	2.49709042290371	48.0545215822808	4.145305876327e-12	3.75211399404924e-11
ENSBTAG00000047532	-2.47508	0.170127475385704	30.235535704789	3.8263416506575e-08	2.09181144469686e-07
ENSBTAG00000003061	-2.4738	1.11116794714933	22.5384427517596	2.05980001575837e-06	8.59331581836808e-06
ENSBTAG00000016236	-2.47332	1.89869540833825	49.542927965474	1.9407820762362e-12	1.84219721678845e-11
ENSBTAG00000005453	-2.47181	3.77361395960236	79.6698576316648	4.42500137276784e-19	8.47545798648354e-18
ENSBTAG00000013790	-2.47065	5.30669462315928	81.5933820764093	1.67172998072738e-19	3.34533130098543e-18
ENSBTAG00000010179	-2.46016	-0.412471514975882	19.138905693836	1.21541911088953e-05	4.46305559171552e-05
ENSBTAG00000013755	-2.45981	-0.292814920801168	25.0754513910515	5.51302531954431e-07	2.52703887083044e-06
ENSBTAG00000022598	-2.4486	-1.2550915594771	23.2929401123761	1.391096866531e-06	5.94932415885626e-06
ENSBTAG00000018382	-2.4477	5.03885446261057	137.368452498487	1.00163651093715e-31	6.00198503704571e-30
ENSBTAG00000021872	-2.44633	1.09213013421572	23.5850915346391	1.19509876262766e-06	5.16047879546871e-06
ENSBTAG00000004885	-2.44605	1.32114280130845	48.5921089534285	3.15134674654536e-12	2.9113992423295e-11
ENSBTAG00000009966	-2.44031	-1.0109565598539	18.3571559664691	1.83129873507523e-05	6.49124594594083e-05
ENSBTAG00000018430	-2.43747	6.49998678823378	126.046576901409	3.00350545451593e-29	1.46434543205172e-27
ENSBTAG00000015994	-2.43742	1.20545901691969	43.0627215121635	5.3012788830397e-11	4.19332723447521e-10
ENSBTAG00000020352	-2.43452	-0.237301524960087	32.1399559316652	1.43456418608629e-08	8.24605330115836e-08
ENSBTAG00000009047	-2.43244	2.02355719770079	44.7742934997559	2.21106554361477e-11	1.84272641964351e-10
ENSBTAG00000018604	-2.42948	-1.31919040430725	28.8996173358745	7.62279709403572e-08	3.99229109524547e-07
ENSBTAG00000007331	-2.41942	6.09342857644683	28.4591637439385	9.56957483071891e-08	4.95382527192524e-07
ENSBTAG00000023736	-2.41552	0.0260357334984893	43.6449339751097	3.93694946391724e-11	3.16075748128565e-10
ENSBTAG00000012737	-2.40948	5.93965756079027	80.8282007730089	2.46219027838384e-19	4.85467884668107e-18
ENSBTAG00000005144	-2.39624	1.76022861626712	64.4230426479972	1.00377346627495e-15	1.34748986537668e-14
ENSBTAG00000009101	-2.39516	2.67421089489484	82.3605226177057	1.13396173195864e-19	2.30357453352053e-18
ENSBTAG00000008429	-2.39115	1.37978359052635	58.4441899055265	2.09140314090333e-14	2.44095648414898e-13
ENSBTAG00000031548	-2.38855	-1.39146615983434	12.4745720693341	0.000412529147793213	0.0011371852066898
ENSBTAG00000007828	-2.38718	6.08380402123038	138.489093212613	5.69674167879352e-32	3.50527455552921e-30
ENSBTAG00000000536	-2.37876	0.475087217726713	41.1485591993374	1.41087222938104e-10	1.05973498125638e-09
ENSBTAG00000008814	-2.37715	0.00371827607996989	21.536338701265	3.47187069890205e-06	1.39892130414814e-05
ENSBTAG00000019347	-2.37079	2.42464917555098	79.8600196841292	4.01897026540528e-19	7.74098462709571e-18
ENSBTAG00000003763	-2.3676	2.71477241332976	22.3275351357651	2.298865816287e-06	9.50564176773105e-06
ENSBTAG00000009734	-2.36156	1.01235742854936	71.1323572881948	3.34046494109995e-17	5.33976556754665e-16
ENSBTAG00000030255	-2.3598	-0.661324186213828	35.3914634700584	2.69666201764452e-09	1.69843786266912e-08
ENSBTAG00000008743	-2.35851	4.67588152203448	150.760226321292	1.18248341936489e-34	9.05951225436275e-33
ENSBTAG00000011766	-2.35784	-0.65988287344573	26.2332401286887	3.02569339910566e-07	1.45206207600928e-06
ENSBTAG00000008839	-2.35226	1.76474448228383	50.9790857615771	9.33553733706368e-13	9.07823875587897e-12
ENSBTAG00000023259	-2.35153	5.06568467167255	126.817460329415	2.03671085753396e-29	1.01137780823654e-27
ENSBTAG00000035868	-2.3513	0.176705072377731	19.6991914483225	9.06397072876862e-06	3.41123333462359e-05
ENSBTAG00000001919	-2.35032	0.800101618010213	59.3766337085994	1.30205972855229e-14	1.54163760920258e-13
ENSBTAG00000011121	-2.34906	-0.761473427443578	24.9417978869008	5.90873741889271e-07	2.69804672435263e-06
ENSBTAG00000005203	-2.34731	-1.1295806960759	31.6531683747818	1.8431364739433e-08	1.04489861625348e-07
ENSBTAG00000006862	-2.34596	4.97563251478287	35.4205792776892	2.65665054372339e-09	1.67717679411284e-08
ENSBTAG00000010587	-2.34407	4.38091448980635	82.7514146387365	9.30491969866186e-20	1.91931862861244e-18
ENSBTAG00000020456	-2.34343	4.56870102820875	242.225698794777	1.28650944028785e-54	3.1361591492108e-52
ENSBTAG00000010254	-2.339	0.382531139395763	27.8879389609573	1.28548574328942e-07	6.52228953761699e-07
ENSBTAG00000021237	-2.33765	6.13701617437784	55.4471862599417	9.60040235562685e-14	1.03909097544353e-12
ENSBTAG00000012348	-2.33648	1.70668227217044	26.1480582288048	3.16214936359431e-07	1.51281061881858e-06
ENSBTAG00000014217	-2.33478	3.89954631744165	56.3925601551723	5.93545272827902e-14	6.58362626303214e-13
ENSBTAG00000014016	-2.331	1.21390955829667	33.4598477792355	7.27504813589791e-09	4.33994250865634e-08
ENSBTAG00000012676	-2.33008	0.93601589358943	53.3710975673833	2.76129703872007e-13	2.83966174854376e-12
ENSBTAG00000018192	-2.3274	2.33874159429058	120.873019713339	4.07390694875779e-28	1.820696913849e-26
ENSBTAG00000001956	-2.325	-0.639986111856062	27.3975141583067	1.65644028816184e-07	8.25986914496692e-07
ENSBTAG00000001333	-2.32125	-0.830431526142305	22.5336050779942	2.06499366597116e-06	8.61163377185329e-06
ENSBTAG00000004564	-2.31906	2.51596332649652	29.9295975914643	4.48021366214601e-08	2.43192164677015e-07
ENSBTAG00000026753	-2.31892	1.95631214153524	25.6241200616845	4.14821675999906e-07	1.94806361505035e-06
ENSBTAG00000001523	-2.31609	-1.11103577004445	6.91551535180709	0.00854510106037096	0.0175415797078543
ENSBTAG00000016959	-2.31407	4.21008122238417	102.68198423004	3.93506761857675e-24	1.21635548348283e-22
ENSBTAG00000002485	-2.31386	0.957682462581964	29.7457578476828	4.92583011292826e-08	2.65766870177407e-07
ENSBTAG00000008169	-2.3104	-0.0881758999290198	39.4766814197613	3.32000326803684e-10	2.39638997664624e-09
ENSBTAG00000009055	-2.30972	2.88619180414222	19.5737289191164	9.67910279447876e-06	3.63000197809717e-05
ENSBTAG00000047225	-2.30577	0.0525798120484669	25.4641402907626	4.50682276676259e-07	2.09809813351977e-06
ENSBTAG00000006354	-2.30574	1.00920733290085	11.0032954191783	0.00090950037054578	0.00232359082207155
ENSBTAG00000019663	-2.3036	4.16007011188168	93.9919345949677	3.1681216003632e-22	8.36977149889056e-21
ENSBTAG00000019589	-2.29996	-0.685084969784824	26.2446713923393	3.00783613904035e-07	1.44472489961013e-06
ENSBTAG00000040356	-2.29744	0.390087800840905	56.2011280193537	6.54239912161754e-14	7.22695911209781e-13
ENSBTAG00000031444	-2.29463	0.774902125739396	19.4017700181228	1.05908856044165e-05	3.93480564575587e-05
ENSBTAG00000031523	-2.29434	-0.658330119119528	6.73285497952568	0.00946529826189189	0.0192318221551529
ENSBTAG00000013759	-2.29382	-0.622702038610001	38.1755760740125	6.46566750989698e-10	4.43135780901949e-09
ENSBTAG00000019121	-2.29248	0.24774746225892	37.4304165462702	9.47331400290385e-10	6.38258580371524e-09
ENSBTAG00000019242	-2.28686	0.276604688179216	41.0627674682064	1.47418018098835e-10	1.10265387875042e-09
ENSBTAG00000012365	-2.28368	4.91655625568845	85.7472388685309	2.04469549750645e-20	4.52464876794164e-19
ENSBTAG00000006305	-2.2817	-1.3152120252987	14.14318231364	0.000169409918031979	0.00050279213636165
ENSBTAG00000021072	-2.27874	1.86423191267895	106.425482241271	5.94878626665559e-25	1.99395879675462e-23
ENSBTAG00000017666	-2.27608	-1.17083424081618	21.5131326912125	3.51413827447513e-06	1.4143582413516e-05
ENSBTAG00000005586	-2.27495	0.590616154629874	27.0083322898662	2.02580318066008e-07	9.96732335585322e-07
ENSBTAG00000017354	-2.27063	0.167363776390244	29.3737454646376	5.9680729982059e-08	3.18000750018661e-07
ENSBTAG00000011658	-2.26611	2.53517950427918	66.4481623039741	3.59217097447355e-16	5.11002995652564e-15
ENSBTAG00000020965	-2.26062	-0.73289110629907	35.6512450350167	2.35997006495391e-09	1.50852436929056e-08
ENSBTAG00000009354	-2.25971	7.99867924342739	197.938092021589	5.88569512891649e-45	9.56514635647853e-43
ENSBTAG00000000843	-2.25766	2.2525262651947	74.5941784283602	5.78134366279319e-18	9.87431403298085e-17
ENSBTAG00000021144	-2.25723	4.8905170064731	41.4809935676789	1.19022499944984e-10	8.99672540105633e-10
ENSBTAG00000023648	-2.2566	-1.08830467971998	12.5322729271285	0.000399982955369895	0.00110487179482294
ENSBTAG00000018905	-2.25575	5.96611896372104	152.845355994469	4.14066632559444e-35	3.31438709017358e-33
ENSBTAG00000044159	-2.25445	-0.781343610692013	24.4334372031389	7.69219691594664e-07	3.44638697244961e-06
ENSBTAG00000007933	-2.25272	-0.0212553955404744	23.2707694038002	1.40722532103483e-06	6.01111063059322e-06
ENSBTAG00000015016	-2.25185	3.78197858566125	89.8864609136118	2.52227179418194e-21	6.07952522795404e-20
ENSBTAG00000015150	-2.24844	0.222711438213637	14.4443985033371	0.000144358556042387	0.000433722653252282
ENSBTAG00000000875	-2.24468	-0.898149641458848	26.4114570123826	2.75899129680805e-07	1.33001980447475e-06
ENSBTAG00000017852	-2.24425	4.25168999104875	146.782107395384	8.75717176559767e-34	6.22049167932455e-32
ENSBTAG00000016206	-2.24317	3.09631230284845	38.4143513238135	5.72101317593771e-10	3.95129345300115e-09
ENSBTAG00000035587	-2.24305	6.35182601324783	60.8055204935535	6.3001003419242e-15	7.7583095599861e-14
ENSBTAG00000010191	-2.23324	3.89865588927311	32.248578159175	1.35656320208347e-08	7.82284779868134e-08
ENSBTAG00000007271	-2.23179	-0.723546628303566	27.8065079333066	1.34074353944408e-07	6.79182794778995e-07
ENSBTAG00000011011	-2.23	3.70975367831231	84.8022935619485	3.29741639767484e-20	7.08779324277762e-19
ENSBTAG00000002350	-2.22629	1.99940148754631	48.4274619031931	3.42734804194093e-12	3.1420286408426e-11
ENSBTAG00000011512	-2.22182	1.44127833543901	95.374432102012	1.57575729584104e-22	4.31162570285485e-21
ENSBTAG00000026851	-2.22078	2.29423448883955	44.7058158811393	2.28976164476333e-11	1.9068310094512e-10
ENSBTAG00000011291	-2.22023	-0.534482717649102	40.450761528715	2.01633845060259e-10	1.48947976729776e-09
ENSBTAG00000014628	-2.21556	3.11300017068308	15.5644228602881	7.97409996137593e-05	0.000252301463674685
ENSBTAG00000013955	-2.21542	1.65077320647023	46.7483360755996	8.07134393244875e-12	7.06143841920435e-11
ENSBTAG00000016269	-2.2147	4.76536865332439	154.891380732289	1.47887161997614e-35	1.22964162758636e-33
ENSBTAG00000020053	-2.21328	4.22720592702529	105.41148833118	9.92328960332805e-25	3.26494491672689e-23
ENSBTAG00000014093	-2.20252	3.02397081757771	89.233226061488	3.50905624821926e-21	8.36403051519994e-20
ENSBTAG00000003727	-2.20203	3.43493290546179	75.2083152946979	4.23579413440423e-18	7.33976217861386e-17
ENSBTAG00000037729	-2.20179	-1.36690003491496	13.7694245313547	0.000206672621419927	0.000604189298814429
ENSBTAG00000013007	-2.20058	4.0994163859963	63.9806967936486	1.25644268833089e-15	1.67411233230274e-14
ENSBTAG00000004552	-2.1986	4.05914691290915	83.7271263142261	5.68004702435873e-20	1.19225409752e-18
ENSBTAG00000011476	-2.1974	-0.126868818271959	14.3756116695613	0.000149729061435136	0.000448100980176693
ENSBTAG00000021512	-2.18978	3.38127117521397	88.8899796953374	4.17392274978855e-21	9.88289081991875e-20
ENSBTAG00000013314	-2.18917	0.73248721608664	56.6043643982604	5.32934264621839e-14	5.93588050086589e-13
ENSBTAG00000016268	-2.18615	0.310349800084294	40.6818118549661	1.79146891866689e-10	1.32885861836936e-09
ENSBTAG00000019272	-2.18354	1.08941317658457	14.9355321082434	0.000111247870469338	0.000341610265861473
ENSBTAG00000009611	-2.18284	3.01513237508051	108.157387807142	2.48260177017788e-25	8.56218218229196e-24
ENSBTAG00000016776	-2.18245	0.24511703852679	41.1578906485167	1.40415255251494e-10	1.05542678894711e-09
ENSBTAG00000000752	-2.18144	-0.0517478553593688	32.9326640314215	9.54067195528125e-09	5.61653388541968e-08
ENSBTAG00000003616	-2.17945	1.57546898276449	105.875597060597	7.85125409144171e-25	2.60719973327566e-23
ENSBTAG00000031397	-2.1745	2.48871681552445	13.6498843936104	0.000220254881061688	0.000640578593890365
ENSBTAG00000007661	-2.17287	6.357921560641	81.8783849655935	1.44723434274222e-19	2.91866613832662e-18
ENSBTAG00000007281	-2.17142	-0.498636255735649	23.9876169881709	9.69572825361251e-07	4.25343072589971e-06
ENSBTAG00000002096	-2.17121	7.0624088900569	17.8374872616405	2.40596156114694e-05	8.35156754202655e-05
ENSBTAG00000004018	-2.16956	2.53007883776249	110.706490677061	6.86130071944518e-26	2.51175124630611e-24
ENSBTAG00000017242	-2.16418	0.586865517607909	25.0012809203191	5.72922396729057e-07	2.62389651038252e-06
ENSBTAG00000044058	-2.15925	3.33260117035802	175.884349935866	3.83786852758283e-40	4.4744541116145e-38
ENSBTAG00000018555	-2.15899	-0.846866186431106	26.4437039195543	2.7133142172727e-07	1.309766349886e-06
ENSBTAG00000020046	-2.1577	2.15314512130647	11.8917340412439	0.000563836052561367	0.00150665308913135
ENSBTAG00000011437	-2.15722	4.54321128433574	113.256185205123	1.89621471224963e-26	7.3425267160973e-25
ENSBTAG00000019076	-2.15372	-1.83564560395826	7.92290798959348	0.00488127526960317	0.010658908497916
ENSBTAG00000024958	-2.15167	4.89649391925481	146.699428772371	9.12931174725768e-34	6.44217090796618e-32
ENSBTAG00000021611	-2.15099	0.0905440147672099	32.6524457541257	1.10200661051493e-08	6.4379754381172e-08
ENSBTAG00000003255	-2.15072	-1.12914430739075	9.42730237554269	0.00213778529027494	0.00506402054405677
ENSBTAG00000009287	-2.1479	2.75608518787475	92.574744821485	6.48294755464665e-22	1.65524350538521e-20
ENSBTAG00000009475	-2.14726	5.74883674142204	42.2405753577617	8.07080177848953e-11	6.20554981190529e-10
ENSBTAG00000015097	-2.14585	-0.497387993843615	22.0169907472417	2.702475155082e-06	1.1063644470767e-05
ENSBTAG00000018025	-2.14425	-0.837059727174195	23.6121646685818	1.17840201619117e-06	5.09864462511757e-06
ENSBTAG00000013334	-2.14214	-1.75073110735325	8.82764607525579	0.00296700855822835	0.00681578221931808
ENSBTAG00000007847	-2.14156	4.86963871497123	81.8196230268965	1.49090905970103e-19	2.99466115624593e-18
ENSBTAG00000047545	-2.1399	3.94264894577791	86.3582290019247	1.50122552742991e-20	3.40425898672584e-19
ENSBTAG00000003322	-2.13769	0.417780350481531	29.1641262285245	6.64991242230303e-08	3.51364338136071e-07
ENSBTAG00000010635	-2.13513	-1.39433109218839	12.8754447076489	0.000332921605515911	0.000936020220383659
ENSBTAG00000039197	-2.13375	2.91738833196304	85.6735113616731	2.12236966608579e-20	4.67444292370353e-19
ENSBTAG00000002764	-2.13219	3.161361885508	32.815866142645	1.01314532113536e-08	5.93500639786885e-08
ENSBTAG00000015182	-2.13084	-1.65458474467364	9.42290682193504	0.00214291561916267	0.00507281238824515
ENSBTAG00000015651	-2.1286	-0.497112467814612	13.5663939458607	0.000230271341711089	0.000667177312585937
ENSBTAG00000001942	-2.12735	3.36273863783815	59.9543450584935	9.70834368049446e-15	1.16870588459016e-13
ENSBTAG00000013048	-2.12717	0.920526750079019	38.6413385603427	5.09287593195203e-10	3.56335207084915e-09
ENSBTAG00000033669	-2.12629	1.95952913379052	32.6115848381491	1.12541934634531e-08	6.5711746918344e-08
ENSBTAG00000016943	-2.12526	0.395739745747611	37.3459835801143	9.89243979754752e-10	6.63994425960542e-09
ENSBTAG00000014374	-2.12451	5.65827671762032	133.907266161247	5.72479292848177e-31	3.23179626057344e-29
ENSBTAG00000011389	-2.12407	0.746202093689177	51.618106057812	6.74169740194259e-13	6.66464943163468e-12
ENSBTAG00000021779	-2.12026	2.16545100964685	64.58819472565	9.23067524681508e-16	1.24695494581031e-14
ENSBTAG00000035726	-2.1196	-0.858334794208097	8.82732675581504	0.00296752777962105	0.00681578221931808
ENSBTAG00000045500	-2.11865	-0.338441104199759	41.8362652196663	9.92454763560343e-11	7.57656213092401e-10
ENSBTAG00000013974	-2.11812	5.91269096923567	17.580562079616	2.75388903838279e-05	9.45525410553578e-05
ENSBTAG00000024042	-2.11422	-1.07497387138027	24.2758077519316	8.34810026901029e-07	3.71542421101263e-06
ENSBTAG00000016343	-2.11309	-0.494706034641004	26.102397587969	3.23781715537755e-07	1.5455641659359e-06
ENSBTAG00000018313	-2.11081	3.08327733275431	53.9259621223798	2.08188519955804e-13	2.1722082344805e-12
ENSBTAG00000000191	-2.10407	4.42491797827291	171.377384467423	3.70116896449594e-39	4.13528524095661e-37
ENSBTAG00000009579	-2.10271	2.39533280696345	91.8766360706869	9.22517816073642e-22	2.31189862037521e-20
ENSBTAG00000006492	-2.10255	3.15500172735615	142.521091890683	7.48071431092382e-33	4.83362299391379e-31
ENSBTAG00000038042	-2.10032	2.7063988907105	27.4361641180498	1.62366347518237e-07	8.11907432858091e-07
ENSBTAG00000019907	-2.09975	0.34000401229154	20.1103882428515	7.30985584122164e-06	2.79122512470428e-05
ENSBTAG00000021588	-2.09939	-0.665599857843572	10.0378834740865	0.00153353304298501	0.00371973663931642
ENSBTAG00000011957	-2.09873	4.75940220597205	161.327091003072	5.80366305377124e-37	5.32052050553422e-35
ENSBTAG00000023182	-2.09603	-1.06329519408968	11.5343928962104	0.000683203846424768	0.00179257447572213
ENSBTAG00000018598	-2.09571	-0.788911846778277	24.3792225825594	7.91174138739064e-07	3.53868467043122e-06
ENSBTAG00000024426	-2.0951	0.545679685937148	23.619950136118	1.17364395899994e-06	5.0821578943211e-06
ENSBTAG00000012961	-2.0924	4.49674548865531	208.507132135207	2.90785447627043e-47	5.47186791446959e-45
ENSBTAG00000007490	-2.09102	-0.337138674554529	15.5482409033662	8.04264472935484e-05	0.000254170322236476
ENSBTAG00000006957	-2.0848	0.928188330004426	48.2699445839182	3.71401357323331e-12	3.38458025373836e-11
ENSBTAG00000013099	-2.08452	4.70358466560804	92.0893140100315	8.28515475926059e-22	2.09097811641951e-20
ENSBTAG00000015209	-2.07793	-0.234871592088559	26.2462195940539	3.0054257642817e-07	1.44427404783537e-06
ENSBTAG00000005761	-2.0721	1.98082537721103	42.9836170333367	5.52001832762209e-11	4.35350857221136e-10
ENSBTAG00000019510	-2.06998	3.84076666356778	125.955040813606	3.14528913914473e-29	1.52653263830165e-27
ENSBTAG00000019900	-2.06992	2.5601713462587	48.2477987661577	3.75619630327497e-12	3.4172147200108e-11
ENSBTAG00000014806	-2.06925	2.20575508920071	27.7634775260159	1.37089823024985e-07	6.93596906493392e-07
ENSBTAG00000015165	-2.0691	1.71768541918091	54.0277709737574	1.9767585562204e-13	2.07057737050976e-12
ENSBTAG00000009336	-2.0691	6.4673047638196	36.380966990076	1.62280221140238e-09	1.0613522267989e-08
ENSBTAG00000016097	-2.069	-1.10567488440593	14.1564295807599	0.00016822122227086	0.000499817404453532
ENSBTAG00000007659	-2.06777	6.8163567844193	96.7343016349387	7.92837268145373e-23	2.20882403587721e-21
ENSBTAG00000010662	-2.06635	2.92646760913765	81.1224183856245	2.1215949017244e-19	4.20632660182919e-18
ENSBTAG00000014306	-2.06296	5.84962323688262	148.186666756673	4.31843921528982e-34	3.17257390569854e-32
ENSBTAG00000017490	-2.06121	0.455508757705483	36.7242962441104	1.3607294225143e-09	8.98165156054672e-09
ENSBTAG00000014612	-2.06083	3.53450361420334	51.5844264936874	6.85834588174624e-13	6.77372172445766e-12
ENSBTAG00000044053	-2.0578	1.35940459881767	69.6188779874393	7.19450119764289e-17	1.11676150283528e-15
ENSBTAG00000012419	-2.05766	1.38346038200239	56.4925167805986	5.64126556057558e-14	6.27028128525738e-13
ENSBTAG00000011851	-2.05457	5.97377492696075	97.2165074060294	6.21463815658882e-23	1.74497928972701e-21
ENSBTAG00000018808	-2.05238	-1.05975647304686	20.4993887620711	5.96502969722199e-06	2.31730925506712e-05
ENSBTAG00000008696	-2.05088	3.93446760568034	61.9215810058817	3.57410933225701e-15	4.54216785518823e-14
ENSBTAG00000002586	-2.05041	5.70015911879101	103.131763726189	3.13582873334102e-24	9.83476578766543e-23
ENSBTAG00000015815	-2.04872	4.22405951876548	17.7337932770682	2.54072768481291e-05	8.77111205255979e-05
ENSBTAG00000007829	-2.04821	0.763321125909908	49.0609623522362	2.48129610014868e-12	2.32846736397154e-11
ENSBTAG00000010367	-2.04585	0.321090263358376	31.959317223402	1.57435428813127e-08	9.00857652089283e-08
ENSBTAG00000013096	-2.0362	5.37304362248593	73.4427719342342	1.03596673197719e-17	1.73080672386096e-16
ENSBTAG00000014773	-2.03043	-0.395542043751656	20.9181117058975	4.79340941253008e-06	1.88606417310336e-05
ENSBTAG00000013064	-2.02783	-0.888825078900718	12.3732487269265	0.000435529123414487	0.00119567068793033
ENSBTAG00000007149	-2.02527	-0.716328730229382	19.0557103746849	1.26957304102291e-05	4.64600492596786e-05
ENSBTAG00000009289	-2.02242	4.00766282514542	27.0364404135683	1.99655847291136e-07	9.82794225812173e-07
ENSBTAG00000010846	-2.02223	0.154660598026368	34.431149937103	4.41598901364302e-09	2.69891157608747e-08
ENSBTAG00000000676	-2.02067	3.61712699153119	117.822583688731	1.89612051775291e-27	8.00700341473139e-26
ENSBTAG00000015961	-2.01885	-1.45113754620792	13.7959276650036	0.00020377745109479	0.000596050433717675
ENSBTAG00000011278	-2.01678	1.82595150393795	61.0361099427666	5.60374917288004e-15	6.94062513028999e-14
ENSBTAG00000021919	-2.01608	4.15495860055312	76.2698655044847	2.47431001556958e-18	4.42324153783321e-17
ENSBTAG00000023452	-2.01491	0.865686393899541	43.4472235354771	4.35549190926362e-11	3.47338336198971e-10
ENSBTAG00000037735	-2.01389	6.68953032193889	101.746134291299	6.31132396208529e-24	1.93415030906648e-22
ENSBTAG00000026275	-2.01139	0.25339593868839	17.5190822724656	2.84438515681652e-05	9.75347672378964e-05
ENSBTAG00000004464	-2.00981	-0.79000006198409	22.7993935671594	1.79822438827467e-06	7.56679277702399e-06
ENSBTAG00000021822	-2.00951	1.88027080495226	80.4465902138738	2.98669510441309e-19	5.84585614779832e-18
ENSBTAG00000002286	-2.00411	2.94792300025152	66.0655298631831	4.36177568669763e-16	6.11560862947958e-15
ENSBTAG00000022681	-2.00379	3.36663216466222	76.1725100530337	2.59935200673053e-18	4.63904319870078e-17
ENSBTAG00000039366	-2.00327	-0.776890504706032	13.0511542908077	0.000303097548713485	0.000858469582123273
ENSBTAG00000011935	-2.00314	-1.45114949666333	11.1442220815755	0.000842938148737057	0.00217183631596293
ENSBTAG00000012545	-2.00308	5.49383334092719	134.367651931182	4.53997759988014e-31	2.604053461835e-29
ENSBTAG00000018101	-2.00209	5.86637438802877	68.8556423217047	1.05941063120162e-16	1.59820512380712e-15
ENSBTAG00000017681	-2.00208	-0.572982755652793	21.2161665823317	4.10289134532685e-06	1.63414825733293e-05
ENSBTAG00000011417	-1.99984	4.9982603718696	101.424021382314	7.42577891898434e-24	2.24996905889904e-22
ENSBTAG00000024851	-1.99876	-0.369983264708992	31.9577573539347	1.57561901484197e-08	9.00857652089283e-08
ENSBTAG00000009374	-1.99498	1.01628925110404	71.2493804385432	3.14809700859207e-17	5.05486355002374e-16
ENSBTAG00000034597	-1.99363	0.212330694804805	32.9308582653102	9.54953785936235e-09	5.61866939547562e-08
ENSBTAG00000009218	-1.99187	0.771908934313018	53.2478489881038	2.9400923477805e-13	3.01197999257819e-12
ENSBTAG00000008603	-1.99026	5.11899076510829	64.0203957858235	1.23137795903951e-15	1.64275621749475e-14
ENSBTAG00000005240	-1.98605	-0.106311010416239	27.2146250516319	1.82076150004122e-07	9.02054866025041e-07
ENSBTAG00000001564	-1.98393	2.36438607813938	93.0319585295158	5.14566959307435e-22	1.32674163594508e-20
ENSBTAG00000019014	-1.98352	0.739774312393464	32.9050675751538	9.67706861364527e-09	5.69058322094075e-08
ENSBTAG00000002083	-1.98343	1.84123647555308	16.1862998678857	5.74078036259446e-05	0.000186592758088449
ENSBTAG00000006222	-1.98066	-0.860804779094347	13.855496241945	0.000197418478395036	0.000579433898966221
ENSBTAG00000001906	-1.97938	0.982818691037547	48.4037000617336	3.46913015689088e-12	3.17490529546174e-11
ENSBTAG00000005138	-1.97419	2.85651523255852	43.6086446196065	4.01063495927539e-11	3.21030377411849e-10
ENSBTAG00000007300	-1.97184	4.53621853835175	71.4935999934717	2.78158902415173e-17	4.47306204993276e-16
ENSBTAG00000019568	-1.96862	0.105003914734755	37.6838601972616	8.31900283950144e-10	5.64030495932316e-09
ENSBTAG00000021076	-1.96707	4.81155780910306	104.324746660676	1.71730692378483e-24	5.54814279051689e-23
ENSBTAG00000012855	-1.96398	-1.22704207370673	7.69548638949078	0.00553590893845481	0.0119521254577026
ENSBTAG00000018869	-1.96306	5.43093024543968	57.2565479328248	3.82513479035723e-14	4.36008456550177e-13
ENSBTAG00000013054	-1.96102	-1.06714399459819	11.8648279164044	0.000572040557408171	0.00152667504821101
ENSBTAG00000023415	-1.96061	-0.681395570024047	16.3680036663822	5.21583311579915e-05	0.000170564103658725
ENSBTAG00000011646	-1.96017	-0.933056555257832	16.0168811935206	6.27802051918939e-05	0.000202764372444521
ENSBTAG00000026088	-1.95911	-0.385383443446031	9.00292869104638	0.00269547307611411	0.00625116631662701
ENSBTAG00000027764	-1.95886	2.88076837438616	65.5644456496801	5.62443428320165e-16	7.77418584041507e-15
ENSBTAG00000010069	-1.95831	6.35577741291152	35.1281400235639	3.08707403816328e-09	1.92623363195691e-08
ENSBTAG00000008499	-1.95806	-0.0571568553459736	18.7227299518233	1.51169740303226e-05	5.45207341793008e-05
ENSBTAG00000000959	-1.95614	0.455963264649288	43.3422341264989	4.59556510422848e-11	3.65939356406494e-10
ENSBTAG00000011075	-1.95613	5.24883870596069	101.519463051472	7.07647077715374e-24	2.15631322601565e-22
ENSBTAG00000013367	-1.95507	5.60330282938028	120.352966799684	5.29493371524562e-28	2.32760077990674e-26
ENSBTAG00000020542	-1.95471	-0.304837587585397	31.8420843184451	1.67229800424704e-08	9.52073693925357e-08
ENSBTAG00000002065	-1.95465	1.23861367647131	17.0611779925928	3.61946934628351e-05	0.000121929736834915
ENSBTAG00000014730	-1.95431	5.66549078569021	124.744960034558	5.78749146907558e-29	2.73465345803104e-27
ENSBTAG00000030347	-1.95342	0.0676062976200832	30.2448441694053	3.80802177721087e-08	2.08285780634186e-07
ENSBTAG00000012185	-1.95216	2.75635019362496	34.9099568480879	3.4531047806198e-09	2.13721880420819e-08
ENSBTAG00000007766	-1.95039	-0.432962844929599	19.5096435612292	1.0009309005483e-05	3.73945832089204e-05
ENSBTAG00000020607	-1.95001	-0.202765524490488	25.5669811189534	4.27288988001779e-07	2.00048087529772e-06
ENSBTAG00000014512	-1.94779	2.52442499321412	85.4992926918554	2.31784496120444e-20	5.06338188470037e-19
ENSBTAG00000019044	-1.94683	3.10793670747231	44.1625647904339	3.02205742781811e-11	2.47439602830359e-10
ENSBTAG00000015730	-1.94658	1.59664653512994	32.2503649370838	1.35531629071235e-08	7.81986150305579e-08
ENSBTAG00000019953	-1.93955	8.34476513285554	22.5965848003449	1.99839527190051e-06	8.35990159376166e-06
ENSBTAG00000019967	-1.93727	5.01201842544214	79.6867698114773	4.38728630218286e-19	8.41825275084317e-18
ENSBTAG00000007153	-1.93603	3.13830702093114	8.88221027191953	0.00287962713492649	0.00663235573313754
ENSBTAG00000043985	-1.93496	-1.54681464613396	12.2092698062048	0.000475526426232313	0.00129191905971829
ENSBTAG00000004046	-1.93412	0.977049168055807	21.1276343028798	4.29686871588481e-06	1.7057073962465e-05
ENSBTAG00000012926	-1.93202	1.82081961413155	32.3381052584405	1.29547791198497e-08	7.49881062274735e-08
ENSBTAG00000018694	-1.93052	4.24686578281916	82.8084570232811	9.04023696872194e-20	1.86831564020253e-18
ENSBTAG00000030521	-1.9272	0.52118661429816	17.4152757173163	3.00402031319375e-05	0.00010248448434897
ENSBTAG00000008453	-1.92685	2.9555413544146	51.1418105157104	8.59284224076877e-13	8.38642637620435e-12
ENSBTAG00000007823	-1.92577	1.4029461775541	19.1047112749448	1.23739056211343e-05	4.53752176725767e-05
ENSBTAG00000017665	-1.92559	1.3622065041176	40.0672618699361	2.45366876168044e-10	1.79890985220673e-09
ENSBTAG00000011202	-1.92226	2.29489955089143	48.4860736006194	3.32642741879554e-12	3.06522856477671e-11
ENSBTAG00000012595	-1.92214	6.79005253957784	55.3276419263838	1.02023745185355e-13	1.10202083671513e-12
ENSBTAG00000030337	-1.92203	1.5244353694086	77.1777179917432	1.56246380529396e-18	2.82613604984537e-17
ENSBTAG00000020980	-1.92194	3.28310117858092	49.8638181253797	1.64795701554335e-12	1.57680525858323e-11
ENSBTAG00000030425	-1.92048	-1.41227712919026	9.45647602131626	0.00210404910849772	0.00499071887168211
ENSBTAG00000025782	-1.92033	6.8003250406513	54.8672824599164	1.28949847883923e-13	1.38035535768758e-12
ENSBTAG00000018119	-1.92027	3.38996150568006	6.42437876540975	0.011256427965551	0.0224625946713488
ENSBTAG00000019761	-1.91868	4.94771191523789	130.972265309699	2.51090015636848e-30	1.34046092591347e-28
ENSBTAG00000008004	-1.91678	6.0934114126721	37.7970792850747	7.84992126569302e-10	5.32900351239388e-09
ENSBTAG00000000533	-1.91562	-1.00300146988564	18.4129820705001	1.77842213777776e-05	6.31634299662392e-05
ENSBTAG00000020394	-1.9155	5.1846103611337	109.659487413544	1.16355763338894e-25	4.13255601845356e-24
ENSBTAG00000016152	-1.91479	-0.298513575176646	15.7884292003678	7.08343802150362e-05	0.000226458885897609
ENSBTAG00000018316	-1.91205	3.06249647795076	53.6514036631402	2.39412578585178e-13	2.47631563925229e-12
ENSBTAG00000016005	-1.91145	4.38940401719629	84.8473659691411	3.22309891617061e-20	6.94195963350321e-19
ENSBTAG00000010717	-1.91076	1.28850571745382	49.4861711459075	1.99774982496806e-12	1.89459457317484e-11
ENSBTAG00000047213	-1.90984	1.50309033629866	66.6842649779226	3.18668642500371e-16	4.56957200462431e-15
ENSBTAG00000012667	-1.90936	1.74401725731503	101.082207198388	8.8244015952357e-24	2.65127539245093e-22
ENSBTAG00000003947	-1.90494	-0.387542528955306	27.9278028133678	1.25927275415602e-07	6.39231403742428e-07
ENSBTAG00000008099	-1.90423	4.46849088516998	19.8637562498646	8.3162127479103e-06	3.14526438413561e-05
ENSBTAG00000039812	-1.9022	-0.599125803262115	24.8881433417402	6.07549415963131e-07	2.7694751532599e-06
ENSBTAG00000010403	-1.90025	0.225448548163547	36.5890370900512	1.45849673571446e-09	9.59156099771509e-09
ENSBTAG00000016615	-1.89884	2.206102391151	65.1485292326422	6.94602695999802e-16	9.50294453736463e-15
ENSBTAG00000015050	-1.89518	-0.782706712449288	20.0043133047782	7.7267675025363e-06	2.93891163943987e-05
ENSBTAG00000020961	-1.89341	0.00239402910188752	29.2333133761352	6.41664431963584e-08	3.39708425332744e-07
ENSBTAG00000018451	-1.89305	3.94145798469835	78.8642255158046	6.65286534389411e-19	1.25631397321493e-17
ENSBTAG00000014249	-1.88904	5.11461157051034	112.393689267887	2.9295972870956e-26	1.12626740148342e-24
ENSBTAG00000013478	-1.88888	4.43677300205621	62.2040131277398	3.09656241944015e-15	3.97293403240611e-14
ENSBTAG00000002885	-1.88642	2.42603178246552	29.7406124608154	4.93892144674492e-08	2.66339222914962e-07
ENSBTAG00000047708	-1.8851	-0.537637112990672	21.0330368743492	4.51431826996192e-06	1.78719110654593e-05
ENSBTAG00000011140	-1.88338	2.31751906077847	33.6648481181878	6.54732001910768e-09	3.93646606081553e-08
ENSBTAG00000006343	-1.88233	7.09250196562859	40.6828464263045	1.79052069218385e-10	1.32885861836936e-09
ENSBTAG00000004034	-1.87983	0.0449401769762278	10.3892323723128	0.00126752308320322	0.00313275394606267
ENSBTAG00000023635	-1.87979	3.75586937917448	19.3834128227977	1.0693180141899e-05	3.96868685820098e-05
ENSBTAG00000017514	-1.87354	-1.60102919747674	7.93664958219826	0.00484434451986567	0.0105847299490893
ENSBTAG00000001292	-1.87349	-1.64975508517037	8.69234622901963	0.00319549023202053	0.00727548890440506
ENSBTAG00000018539	-1.87296	-0.175896231309349	10.9435610774175	0.000939294644199516	0.00239024302578505
ENSBTAG00000000877	-1.87278	-0.527622130557116	28.4461179972291	9.634275098923e-08	4.984912431792e-07
ENSBTAG00000021999	-1.87255	4.91378430159596	97.558585477975	5.22861558611572e-23	1.47584554675466e-21
ENSBTAG00000018225	-1.87132	2.70852835115401	63.2500905803916	1.82059289455735e-15	2.38433203748744e-14
ENSBTAG00000020468	-1.86952	1.09443465086782	36.7884152636703	1.31670343275199e-09	8.71249908679693e-09
ENSBTAG00000025622	-1.86777	0.2351162357507	19.3007346805637	1.11663375862358e-05	4.13428156541129e-05
ENSBTAG00000021790	-1.86557	1.92399319492491	59.3764443260954	1.30218504003127e-14	1.54163760920258e-13
ENSBTAG00000003556	-1.86556	0.207269880948946	25.2878502666047	4.93809472376605e-07	2.28498723067794e-06
ENSBTAG00000000286	-1.86454	-0.797950078691168	27.167334032212	1.86584742994344e-07	9.23112524611316e-07
ENSBTAG00000044192	-1.86244	0.521349451819841	12.3679815483838	0.000436759527204336	0.00119874173203524
ENSBTAG00000001390	-1.86165	3.86749145849166	116.507026227736	3.68072926579915e-27	1.54216805097506e-25
ENSBTAG00000047448	-1.86153	4.49237842764718	54.6896997432233	1.41144110056971e-13	1.50637982534435e-12
ENSBTAG00000039016	-1.86112	3.60272229624359	15.5757769836817	7.92635644506746e-05	0.000251087121174819
ENSBTAG00000004459	-1.85445	-0.187929933715928	11.8422845678093	0.000579007461995045	0.00154373205005192
ENSBTAG00000010273	-1.85161	2.97037176290753	35.9676343073738	2.00622439904268e-09	1.29241819244035e-08
ENSBTAG00000020648	-1.8514	2.77451054692081	75.7453649041132	3.22707731099264e-18	5.67436577667329e-17
ENSBTAG00000014496	-1.84662	0.801368884324036	24.3604011565724	7.98941988799849e-07	3.56763187837934e-06
ENSBTAG00000014089	-1.84621	1.03698271006555	43.7125751778011	3.80320158684455e-11	3.06715340003719e-10
ENSBTAG00000002846	-1.84399	2.41654924462354	36.8731982904326	1.26067097805237e-09	8.36237285750753e-09
ENSBTAG00000037962	-1.84315	3.02418704799493	66.3420283511031	3.79088895744584e-16	5.36425790996887e-15
ENSBTAG00000018593	-1.84314	4.92551472172551	125.862615979203	3.2952421613254e-29	1.59210664064758e-27
ENSBTAG00000017095	-1.84271	5.31773485764966	35.5258226324681	2.51691725029752e-09	1.59742333885747e-08
ENSBTAG00000038931	-1.84237	2.2090381452769	88.4541625050584	5.20265893244215e-21	1.22108795862964e-19
ENSBTAG00000019916	-1.8394	-1.52982853801223	9.06113093057137	0.0026110043375668	0.00607761122498731
ENSBTAG00000007636	-1.83862	6.0248232904772	96.2828653333441	9.95882074719698e-23	2.75304926119677e-21
ENSBTAG00000014744	-1.83672	2.81130955726867	55.8828986768197	7.6918744804684e-14	8.42727739300347e-13
ENSBTAG00000014828	-1.83653	-0.717069871226973	20.3634835930619	6.40402404835454e-06	2.47440785096004e-05
ENSBTAG00000004136	-1.8358	2.12280754823933	20.2318344772765	6.86017761799309e-06	2.63830280138379e-05
ENSBTAG00000003746	-1.8353	6.28415687656137	59.834244625136	1.03192132949804e-14	1.23669141678168e-13
ENSBTAG00000003733	-1.82922	0.34570554701812	20.5088531652737	5.93560785418344e-06	2.30755091859266e-05
ENSBTAG00000013392	-1.82519	1.57187400699835	48.8614744515963	2.74693680354106e-12	2.55317540336061e-11
ENSBTAG00000004788	-1.82487	-0.452450993843867	19.4440856843125	1.03588109540467e-05	3.85258690336703e-05
ENSBTAG00000014373	-1.82465	2.04017266755705	42.9372057653876	5.65253627243113e-11	4.45147606887638e-10
ENSBTAG00000017367	-1.82302	4.55529980895433	22.14059430712	2.53394395872852e-06	1.04094534283118e-05
ENSBTAG00000020848	-1.82293	4.67918000038398	52.2149272726463	4.97465418909744e-13	4.99140700021134e-12
ENSBTAG00000006525	-1.81972	2.74522707596707	39.4660270860639	3.33816679634197e-10	2.40788009802044e-09
ENSBTAG00000000130	-1.8196	0.999050116310435	46.3080125279029	1.01049880040873e-11	8.73377125961646e-11
ENSBTAG00000025149	-1.81932	0.795245439315108	37.51406720051	9.0756062595637e-10	6.13003480730984e-09
ENSBTAG00000017783	-1.8175	2.6022058090452	63.3489392436794	1.73148600356906e-15	2.27040573035229e-14
ENSBTAG00000031209	-1.81469	-0.0926214848585773	19.571133209747	9.69226244554622e-06	3.63366679450992e-05
ENSBTAG00000001949	-1.81314	0.636962611005985	41.5181252473117	1.16783136212127e-10	8.83991474249315e-10
ENSBTAG00000003496	-1.81274	0.222180619160045	30.961077064006	2.63255280316307e-08	1.46760713964278e-07
ENSBTAG00000005708	-1.81085	1.04558153411949	30.7694259296279	2.90580256100251e-08	1.60989867093559e-07
ENSBTAG00000012505	-1.81081	-0.32650166934443	27.6826260353416	1.42940756972402e-07	7.22177371307578e-07
ENSBTAG00000001801	-1.81019	4.5185906914434	55.7570937355492	8.20018480242553e-14	8.96586974422184e-13
ENSBTAG00000003749	-1.80914	0.712765743098128	12.9570710465374	0.00031871541549016	0.000899616196459856
ENSBTAG00000008783	-1.80652	3.40575149928973	59.9104879227178	9.9271045048725e-15	1.19236419842399e-13
ENSBTAG00000008989	-1.80572	1.44918603106529	49.3617593164641	2.12854695115633e-12	2.0150745452871e-11
ENSBTAG00000013303	-1.80184	0.574903547279223	39.9831350556027	2.56165042776793e-10	1.87295586150231e-09
ENSBTAG00000017151	-1.80158	-1.79912836193873	5.93279567808441	0.0148616461805878	0.0286753043592345
ENSBTAG00000006886	-1.80153	1.16160771296072	39.1701911568286	3.8842546441207e-10	2.76827344271353e-09
ENSBTAG00000007107	-1.80081	-0.261366643375704	19.6711611011149	9.19790481420344e-06	3.45678791300442e-05
ENSBTAG00000008053	-1.80042	2.86896824154893	82.9440527519611	8.44089299248754e-20	1.75119957906037e-18
ENSBTAG00000011103	-1.79853	6.33178177396317	28.5644922003394	9.06289645604219e-08	4.70743958293019e-07
ENSBTAG00000017468	-1.79724	1.78965502536649	40.6116437885267	1.85696802732991e-10	1.37649198763930e-09
ENSBTAG00000015242	-1.79712	2.17898997480557	60.343645698626	7.96613025031606e-15	9.72067270362799e-14
ENSBTAG00000020119	-1.79581	-0.779482681533625	9.98286570878909	0.00158003588156533	0.00382129985697175
ENSBTAG00000007872	-1.79469	2.80466327499661	42.6992021512573	6.38383220524012e-11	4.97623431928819e-10
ENSBTAG00000004064	-1.79219	2.2425697434359	28.1583240549333	1.117858603896e-07	5.71776413227872e-07
ENSBTAG00000031863	-1.79103	2.80152940061661	26.9587679708191	2.07842164715767e-07	1.02008767436877e-06
ENSBTAG00000010052	-1.79071	-0.652516933745291	12.2127819844707	0.000474632050463399	0.00128981590404622
ENSBTAG00000011541	-1.78951	0.885234836643221	13.8238211183656	0.000200774519425497	0.000588390026054065
ENSBTAG00000037527	-1.7863	3.72617730676516	9.0351600541328	0.00264835866250722	0.00615121156649035
ENSBTAG00000016377	-1.78558	2.03904298723984	60.808809457261	6.28958353949392e-15	7.7583095599861e-14
ENSBTAG00000010932	-1.7845	-0.766903361323955	17.3883548323874	3.04687019554277e-05	0.000103847250452468
ENSBTAG00000039861	-1.78391	4.98564676965602	12.4730742159912	0.000412860068009972	0.00113780500757322
ENSBTAG00000020173	-1.78273	6.9389177848548	100.033112383444	1.49870379600912e-23	4.41623541648181e-22
ENSBTAG00000009412	-1.78261	0.209766133147212	43.8577265205313	3.53134315418309e-11	2.86731163298773e-10
ENSBTAG00000020632	-1.78224	2.69055278892391	16.2391846660964	5.58273753759898e-05	0.000181731237718624
ENSBTAG00000009895	-1.77897	-0.167103434536123	22.2941083250826	2.33923215691989e-06	9.65394540789638e-06
ENSBTAG00000003975	-1.77839	-0.298686849662615	12.0740026294631	0.00051129809229882	0.0013782818140229
ENSBTAG00000000205	-1.77202	2.67460044033114	79.8869130716072	3.96463837513016e-19	7.66211012822452e-18
ENSBTAG00000030173	-1.7707	-0.685312163552376	24.101403707121	9.13936512994154e-07	4.03256306186915e-06
ENSBTAG00000003770	-1.77037	0.747949704237656	41.6408658343028	1.09676608322743e-10	8.33728774535608e-10
ENSBTAG00000011195	-1.76524	0.997735256215055	7.70673660910631	0.0055015119835943	0.0118862181396698
ENSBTAG00000014259	-1.76473	-0.447983758323441	20.9776071727464	4.64683036768131e-06	1.83444617312292e-05
ENSBTAG00000021787	-1.76371	-0.752960947747506	20.2438206190724	6.81733067561378e-06	2.62370609352829e-05
ENSBTAG00000007013	-1.76305	-0.928274241288805	11.9890296510345	0.000535146476751769	0.00143607233165861
ENSBTAG00000010153	-1.76291	1.71941669149109	55.7129389808047	8.38644823176508e-14	9.15086914892291e-13
ENSBTAG00000040116	-1.76193	1.81058256212837	29.495737916957	5.60398019258729e-08	3.00091320747335e-07
ENSBTAG00000005903	-1.76164	0.329851352875376	29.3859972372727	5.93046096819938e-08	3.16310911710127e-07
ENSBTAG00000019250	-1.76005	5.58312662990566	67.6646417144911	1.93808149353473e-16	2.83987187153737e-15
ENSBTAG00000011413	-1.75773	3.21010607874349	38.8366513287414	4.60794211507706e-10	3.24110889896473e-09
ENSBTAG00000026283	-1.75071	3.15759829361825	118.423221955483	1.40072467666501e-27	5.98572624777247e-26
ENSBTAG00000019434	-1.75028	4.80045723734642	42.1872189108277	8.29403121457775e-11	6.36805861185118e-10
ENSBTAG00000008320	-1.75017	5.857055808558	42.7930802050663	6.08470158807189e-11	4.77079745860081e-10
ENSBTAG00000001796	-1.74834	2.01741609524742	52.2759795022927	4.82237210403189e-13	4.84314262058484e-12
ENSBTAG00000038251	-1.74666	1.18518882735234	39.0867767505686	4.0538037219707e-10	2.88145120754524e-09
ENSBTAG00000021934	-1.74658	2.14787641120204	61.1393410216516	5.31748807293306e-15	6.62431789434147e-14
ENSBTAG00000046841	-1.74525	4.16061665717497	104.487684413839	1.58173511181187e-24	5.14111842705881e-23
ENSBTAG00000011511	-1.74511	4.06487638215308	19.7660499617979	8.75235979872821e-06	3.29742926593462e-05
ENSBTAG00000007117	-1.74443	3.38930380593744	70.6202537341559	4.33048279176549e-17	6.86096874807631e-16
ENSBTAG00000000895	-1.74387	-0.369452826609097	16.4421395320827	5.01577254636276e-05	0.00016457380340253
ENSBTAG00000006801	-1.74359	6.81059138785949	132.334229841913	1.26435512905013e-30	6.99045005886168e-29
ENSBTAG00000010559	-1.74342	-0.24002683078732	16.2263119565194	5.62079925244013e-05	0.000182859244105772
ENSBTAG00000006221	-1.74263	1.47819147073243	14.6208317220729	0.000131453394241024	0.000398183876483824
ENSBTAG00000020060	-1.74196	9.33241954899654	86.1850922994004	1.63858254285699e-20	3.67686953026864e-19
ENSBTAG00000007921	-1.74131	2.35801468529293	27.3865835788425	1.66582959948103e-07	8.29897272830167e-07
ENSBTAG00000021535	-1.74071	-0.518841280607555	13.9559900149885	0.000187140414143222	0.000551144448682099
ENSBTAG00000009873	-1.74045	5.76870543314785	48.2745122938432	3.70537227913621e-12	3.37957679132781e-11
ENSBTAG00000017875	-1.7399	6.87771134283372	115.711094806212	5.49834696621338e-27	2.26827959844634e-25
ENSBTAG00000004240	-1.73867	3.45730168572371	56.8393258874192	4.72913964691332e-14	5.28933804512954e-13
ENSBTAG00000004945	-1.73864	0.549526675752977	22.5582337228672	2.03868884087345e-06	8.51186317913921e-06
ENSBTAG00000009109	-1.73676	2.05852741635736	35.7725534314157	2.2174997050804e-09	1.42254197587873e-08
ENSBTAG00000002041	-1.73626	4.51388144438238	74.9464530542555	4.83655293543918e-18	8.32694490939337e-17
ENSBTAG00000011193	-1.73597	1.94182383738787	8.40161672234177	0.00374887451116956	0.00841046392110536
ENSBTAG00000008057	-1.73468	2.2827028109072	47.3981268116077	5.79380250245406e-12	5.13589468110102e-11
ENSBTAG00000009543	-1.73222	3.99963577100222	86.2345737978473	1.59809154729078e-20	3.60107771769768e-19
ENSBTAG00000019513	-1.73193	-0.754588844436105	12.8239585009615	0.000342208943834821	0.000956366110362765
ENSBTAG00000014246	-1.73103	-0.237960427237404	24.6002059973279	7.05441925274241e-07	3.185924248628e-06
ENSBTAG00000004085	-1.72974	0.872964478854513	43.7062219882476	3.81556787462146e-11	3.07250608282205e-10
ENSBTAG00000013510	-1.72851	1.87098061705256	47.5810427654044	5.27763806298739e-12	4.72520416223729e-11
ENSBTAG00000011885	-1.72633	3.55678114881328	55.4625245731794	9.52578323400172e-14	1.03205607038285e-12
ENSBTAG00000012253	-1.72585	1.63901332113791	28.4095434028241	9.81801319905333e-08	5.07264015284422e-07
ENSBTAG00000039466	-1.72506	1.58929153004121	38.9366321226356	4.37787894333059e-10	3.09743598589471e-09
ENSBTAG00000001941	-1.7235	2.10844831996272	38.241009388849	6.2524488319228e-10	4.28796458895166e-09
ENSBTAG00000016704	-1.72297	4.27785708454236	15.1278245195184	0.000100471494344111	0.000311191812975725
ENSBTAG00000000163	-1.71938	8.81181255490106	68.0335039865302	1.60740962234207e-16	2.37807939437808e-15
ENSBTAG00000008579	-1.71535	4.57391412136813	111.517455594205	4.55774579455347e-26	1.73355962384328e-24
ENSBTAG00000011088	-1.71458	3.78873627953568	63.4025681538696	1.68498194668854e-15	2.21756028959279e-14
ENSBTAG00000004138	-1.71304	1.06447498648204	45.9677495612518	1.20215789549265e-11	1.03154764696433e-10
ENSBTAG00000016770	-1.71112	1.81266163610084	24.9348050928768	5.93020802199874e-07	2.70669835080675e-06
ENSBTAG00000010083	-1.71016	5.93955019761091	128.791125542749	7.53443198626585e-30	3.84830083260417e-28
ENSBTAG00000004502	-1.70956	1.32958823333716	52.7241124209407	3.83849549677213e-13	3.91365995231729e-12
ENSBTAG00000026936	-1.70797	0.316424384929028	20.1914928540466	7.00638306346906e-06	2.68394516924175e-05
ENSBTAG00000004962	-1.70487	2.51657309875385	65.3957435988287	6.12710855843602e-16	8.41477162583672e-15
ENSBTAG00000007566	-1.70323	5.89369734813883	59.6351299702882	1.14178723909698e-14	1.36227029216399e-13
ENSBTAG00000047254	-1.70261	0.747672337148074	17.9526371742304	2.2647042505351e-05	7.89188362288483e-05
ENSBTAG00000013937	-1.70069	1.85469441965611	61.9577966546726	3.50897718129787e-15	4.46468437088979e-14
ENSBTAG00000039090	-1.69918	1.01403563420625	43.8528189230261	3.5402089298118e-11	2.87233592898346e-10
ENSBTAG00000005733	-1.69912	2.12671714354342	41.8255983895978	9.97883837860836e-11	7.60717984711821e-10
ENSBTAG00000008492	-1.699	3.09423867745702	61.7033595595368	3.99298450033233e-15	5.03275578737538e-14
ENSBTAG00000004331	-1.69877	4.1678162862079	116.207569908537	4.28064900947803e-27	1.7796217548706e-25
ENSBTAG00000034349	-1.69834	3.23626920605981	11.6228768527643	0.000651455608037669	0.00171810003732777
ENSBTAG00000003610	-1.69828	2.68928309927472	97.4950596258998	5.39908117679494e-23	1.51996180321004e-21
ENSBTAG00000009256	-1.69439	2.86564189326989	7.35476580492266	0.00668852215852204	0.0141083753534528
ENSBTAG00000000090	-1.68806	1.00389036267522	44.1347028220367	3.06537986496154e-11	2.50795304588692e-10
ENSBTAG00000008800	-1.68801	2.42924892548292	23.7478624791769	1.0981726982759e-06	4.78626589260762e-06
ENSBTAG00000000218	-1.68792	1.35084641766464	38.5147145406336	5.43424217300819e-10	3.77488331842511e-09
ENSBTAG00000019079	-1.68609	4.01943058139536	71.6409295057554	2.581460258239e-17	4.16372071125888e-16
ENSBTAG00000013444	-1.68242	-1.31849233806925	10.3878004351702	0.00126850645917383	0.00313357906059385
ENSBTAG00000009780	-1.67974	3.80487704172679	51.9285030952272	5.75587759698767e-13	5.71643917641572e-12
ENSBTAG00000014737	-1.67819	4.60090136909523	13.6703172118787	0.000217871132844298	0.000634506046942149
ENSBTAG00000031461	-1.67707	-0.600819094407641	14.3989792710406	0.00014788244815231	0.000442821646812305
ENSBTAG00000013029	-1.67574	1.18444867283519	40.2436376163436	2.24184262044987e-10	1.64811541788522e-09
ENSBTAG00000005647	-1.67365	0.422019568168209	16.597641068639	4.62084593201732e-05	0.000152502133744055
ENSBTAG00000038235	-1.67356	1.50654573306689	35.5721061867832	2.45781908331465e-09	1.56454406454795e-08
ENSBTAG00000006748	-1.67348	4.17634311441269	19.2265097878479	1.16090033774777e-05	4.28191782072992e-05
ENSBTAG00000025778	-1.67226	-0.654333465677594	14.6511571797263	0.000129355201960225	0.000392493322836033
ENSBTAG00000003372	-1.67135	-0.237916155520417	20.8229737249951	5.03750588810316e-06	1.97486433317962e-05
ENSBTAG00000004851	-1.66927	2.00699548041711	34.9493861726798	3.38388060216429e-09	2.09679395371544e-08
ENSBTAG00000025263	-1.66843	-0.868157464595897	10.5132026783206	0.00118524655017229	0.0029469064666546
ENSBTAG00000019998	-1.66773	1.33549831148233	47.256715477798	6.2272268922754e-12	5.50191397418006e-11
ENSBTAG00000039163	-1.66744	-0.709197168550978	19.1930548018761	1.18142443686989e-05	4.35312899686241e-05
ENSBTAG00000022382	-1.66716	1.55271394619982	48.8473798731033	2.76674783400228e-12	2.56936253398341e-11
ENSBTAG00000039954	-1.66581	1.5293977182099	20.2167833265696	6.91436412804775e-06	2.65628472913467e-05
ENSBTAG00000012176	-1.66548	2.76147345870354	75.6098752073668	3.45628621738952e-18	6.04765513339642e-17
ENSBTAG00000016362	-1.66388	-0.0580150065097199	17.4332947438224	2.97567833936543e-05	0.00010158948604981
ENSBTAG00000017533	-1.6638	-1.06107285324048	6.92355868086278	0.00850675246975595	0.0174795837146748
ENSBTAG00000006784	-1.6636	0.188437130408145	26.0750955994801	3.28392576649486e-07	1.56548390095217e-06
ENSBTAG00000014468	-1.66335	3.99782751770676	38.3998176879581	5.76377805456405e-10	3.97570954426071e-09
ENSBTAG00000005448	-1.66288	3.10250201682951	29.3721770897673	5.97290501668529e-08	3.18100194682058e-07
ENSBTAG00000014679	-1.66243	2.99776335794721	86.9012889502675	1.14075000366812e-20	2.60888796148066e-19
ENSBTAG00000004358	-1.65616	0.589191195387092	28.7520317181853	8.22635743394729e-08	4.29371824021989e-07
ENSBTAG00000025822	-1.65096	0.360166918765993	34.5291418479246	4.19917204636985e-09	2.57667730946012e-08
ENSBTAG00000009918	-1.64979	-0.552743890576849	18.8392349773366	1.42211442184278e-05	5.15672727812226e-05
ENSBTAG00000003804	-1.64939	0.80434506042299	24.8003290025915	6.35866152689483e-07	2.88628876586855e-06
ENSBTAG00000046750	-1.64713	0.314393312552644	19.8419982450225	8.4114095283393e-06	3.17790696023132e-05
ENSBTAG00000033679	-1.64608	0.821167458691602	30.1033931911662	4.09613879702405e-08	2.22795054446653e-07
ENSBTAG00000038195	-1.64561	4.37861845446998	50.9487392011167	9.48098927454056e-13	9.21133070278279e-12
ENSBTAG00000046229	-1.64557	0.371222592375767	24.1279391088407	9.01429195866177e-07	3.98652991560164e-06
ENSBTAG00000020958	-1.64493	5.68239824219837	107.41536762284	3.60996548063962e-25	1.22922189667748e-23
ENSBTAG00000021686	-1.6444	0.0980463802957582	25.1651196502309	5.26254404294541e-07	2.4194619547635e-06
ENSBTAG00000000770	-1.64229	0.52750978077738	22.2594906009792	2.38178637165411e-06	9.81823236831742e-06
ENSBTAG00000005445	-1.64173	0.155042680415441	25.4854372197243	4.45734684628781e-07	2.08048312764504e-06
ENSBTAG00000019939	-1.64167	0.638676830797998	40.2504643088228	2.23402242653177e-10	1.64349276728256e-09
ENSBTAG00000017765	-1.64126	-1.33790270882589	5.148054926024	0.0232724278089096	0.0427285280175222
ENSBTAG00000018877	-1.63921	2.90124810892444	39.4296769703699	3.40088855770691e-10	2.44982744593448e-09
ENSBTAG00000019819	-1.63757	2.89736599806497	67.163252898751	2.49929523646103e-16	3.6177382869475e-15
ENSBTAG00000002823	-1.63663	5.09602738683481	35.763337594461	2.22801417964665e-09	1.42843276096174e-08
ENSBTAG00000031778	-1.63645	1.64408091809413	39.2229244648631	3.78074996575181e-10	2.69988842427789e-09
ENSBTAG00000007256	-1.63533	3.2695253194077	35.8675635784886	2.11195577849032e-09	1.35808379377021e-08
ENSBTAG00000013177	-1.63004	2.23692478278551	52.6921312998865	3.9015108751383e-13	3.9703610670525e-12
ENSBTAG00000001754	-1.62887	0.804101026223823	30.1985915526332	3.89992579554593e-08	2.12770112324647e-07
ENSBTAG00000019023	-1.62726	3.64966378579521	65.0592136679097	7.26809302575614e-16	9.9182653682265e-15
ENSBTAG00000016424	-1.6259	2.94363016023022	46.5671014129279	8.8534215196686e-12	7.71419977416453e-11
ENSBTAG00000006667	-1.62568	3.41788983161343	29.8776322569894	4.60191281244639e-08	2.49419488763517e-07
ENSBTAG00000010520	-1.62551	-0.420924696822574	7.20122100881382	0.00728539957792481	0.0152177596636459
ENSBTAG00000047988	-1.62407	1.79123981431858	36.6831095437797	1.38978385644815e-09	9.16778698909158e-09
ENSBTAG00000007484	-1.62303	-0.210681281856765	17.508325918117	2.86052258148487e-05	9.79628518806089e-05
ENSBTAG00000046774	-1.62274	1.5934287604679	60.6200993221056	6.92235883433049e-15	8.49533419416806e-14
ENSBTAG00000015220	-1.62214	3.46092765427347	66.8257982268359	2.96591187910347e-16	4.2643928706788e-15
ENSBTAG00000011420	-1.62072	1.89484424187876	20.0430611183056	7.57177726985012e-06	2.88507577251909e-05
ENSBTAG00000014714	-1.61995	3.30137626971277	95.0852182231344	1.82363377336193e-22	4.96454209469038e-21
ENSBTAG00000012725	-1.61911	1.21105295687982	26.7671155924722	2.29509874754354e-07	1.11947381383138e-06
ENSBTAG00000019700	-1.6185	-0.756035695154411	13.3795514643201	0.000254382556771143	0.000730328507475182
ENSBTAG00000014495	-1.61806	2.69300904281474	75.0907784810785	4.49561152812965e-18	7.7774079436643e-17
ENSBTAG00000045647	-1.61674	0.875043125602331	31.617567457055	1.87723676362848e-08	1.06310673319319e-07
ENSBTAG00000006491	-1.61645	1.78807674749347	38.5135675454466	5.4374368142521e-10	3.77488331842511e-09
ENSBTAG00000009983	-1.61591	2.50943476543286	21.2672040761176	3.99508494881766e-06	1.59535670740946e-05
ENSBTAG00000011024	-1.61568	3.02442022715018	70.2453180144398	5.23694254554214e-17	8.23628236707991e-16
ENSBTAG00000016782	-1.61527	1.92419053043128	27.9342498199975	1.255084050496e-07	6.37406795720649e-07
ENSBTAG00000002472	-1.61487	5.2567639213426	105.374415599133	1.01106925761153e-24	3.30631977351869e-23
ENSBTAG00000018254	-1.61416	6.68438226737121	84.4561885975389	3.9282375846214e-20	8.41210654368309e-19
ENSBTAG00000002817	-1.61352	4.43606868326785	22.5395232950745	2.05864175293571e-06	8.59182546380872e-06
ENSBTAG00000034430	-1.61307	-1.02706847416075	14.5695675560597	0.000135078538512094	0.000407897636283988
ENSBTAG00000021041	-1.61104	-0.520532935294755	10.1585710632289	0.00143631904666992	0.00350619287755414
ENSBTAG00000046092	-1.61083	1.45932997103092	40.5814301627334	1.88590457808705e-10	1.39601190507672e-09
ENSBTAG00000015343	-1.60996	-1.10313845624167	12.8170699925397	0.000343471188350829	0.000959393741211196
ENSBTAG00000003889	-1.60913	0.910314675528845	23.2234912187955	1.44224781082794e-06	6.14846980085075e-06
ENSBTAG00000012024	-1.60758	-0.179132154412653	18.3973072474676	1.79311200785443e-05	6.36430158711007e-05
ENSBTAG00000009839	-1.60446	2.5413370130306	60.277848268188	8.23691835921297e-15	1.00282844859158e-13
ENSBTAG00000010963	-1.60371	0.373012687557168	16.9892900911869	3.75912647029588e-05	0.00012600122037623
ENSBTAG00000014907	-1.60301	0.797208384184311	24.8779030838239	6.10785278516581e-07	2.78304286209382e-06
ENSBTAG00000003162	-1.60254	1.42082062566691	25.7874741665063	3.8115406417162e-07	1.79940954766937e-06
ENSBTAG00000004939	-1.60166	0.825391014127148	35.1024790150749	3.12802330347627e-09	1.94725350859469e-08
ENSBTAG00000016522	-1.60003	1.95129690810579	70.2592341927094	5.20012856107822e-17	8.19039338415932e-16
ENSBTAG00000014814	-1.59932	1.18226806323151	20.4569626622693	6.09872839685299e-06	2.36582136653328e-05
ENSBTAG00000025898	-1.59918	4.77970012822718	39.273638112801	3.68381491279442e-10	2.6381024932493e-09
ENSBTAG00000005715	-1.59911	2.23986898501284	18.5864202086184	1.62373107316246e-05	5.81313067114169e-05
ENSBTAG00000010531	-1.59859	1.14533725661465	8.55704663962956	0.00344187335451332	0.00778522429365454
ENSBTAG00000012372	-1.59856	2.39784635936774	42.0716457798463	8.79898024152391e-11	6.74609450111404e-10
ENSBTAG00000014642	-1.59841	0.463170293658751	17.4456180783908	2.95644995643257e-05	0.000100990070804763
ENSBTAG00000017922	-1.59836	2.32827503254933	67.720235573175	1.88419810192848e-16	2.76469341194048e-15
ENSBTAG00000013198	-1.59822	1.91458317096091	54.1807621153987	1.82868473115282e-13	1.924874624764e-12
ENSBTAG00000002742	-1.59744	1.81895932206379	25.7890097602404	3.80850933452943e-07	1.79940954766937e-06
ENSBTAG00000020551	-1.59692	2.16718776647522	43.2232135433973	4.88378100227043e-11	3.87165077829657e-10
ENSBTAG00000016243	-1.59683	4.15060245291548	60.9821972317163	5.75932709025603e-15	7.12509139216681e-14
ENSBTAG00000013044	-1.59656	2.27516750720167	43.8088421594473	3.62065572023386e-11	2.92874458938374e-10
ENSBTAG00000001817	-1.59601	0.387522642689149	25.2125768504944	5.13462648207215e-07	2.36775596073542e-06
ENSBTAG00000020485	-1.59572	3.96343923017414	52.5968207385272	4.09551665607852e-13	4.15989693684642e-12
ENSBTAG00000030172	-1.59549	3.5128296231693	65.4075173095302	6.09061248193251e-16	8.3753730104113e-15
ENSBTAG00000020067	-1.59283	-0.669883594636285	11.3644314434818	0.000748639904898658	0.00194995425447863
ENSBTAG00000001872	-1.59254	3.04023255102732	60.6026613214832	6.983952646234e-15	8.56112869525781e-14
ENSBTAG00000003447	-1.59253	1.4334656255235	28.5797404112672	8.99180741473394e-08	4.67504247845062e-07
ENSBTAG00000011473	-1.59198	2.41336277242033	42.93462008283	5.66001211114772e-11	4.45409316978506e-10
ENSBTAG00000013464	-1.59162	0.429693903818916	19.7920057706791	8.63430484595574e-06	3.2552391486018e-05
ENSBTAG00000039347	-1.59076	5.69801836609665	32.8245134784463	1.00864846968957e-08	5.91189261524064e-08
ENSBTAG00000008397	-1.59012	-0.377062648950733	19.0250833733189	1.2901135699179e-05	4.71516248497229e-05
ENSBTAG00000022161	-1.58936	5.82506043498599	23.4846535897267	1.25914138039356e-06	5.41087758257263e-06
ENSBTAG00000020614	-1.58902	-0.375120084017177	14.6669875632979	0.000128273338524087	0.000389679957343093
ENSBTAG00000003553	-1.58732	1.81426384917776	29.8842674567885	4.58619104868973e-08	2.48693049485572e-07
ENSBTAG00000004547	-1.58603	2.5473474721794	8.26572585735043	0.00404005053494473	0.00899410170980016
ENSBTAG00000019667	-1.58567	0.867331302424223	30.9212631880691	2.68711528168669e-08	1.49646928927162e-07
ENSBTAG00000013465	-1.58225	1.60473284274385	50.0168404327768	1.524321088032e-12	1.46111420824229e-11
ENSBTAG00000048195	-1.57954	2.92961309701536	61.0886159722079	5.4562730578342e-15	6.76577859171441e-14
ENSBTAG00000006069	-1.57951	-1.34542097962295	8.53418548988007	0.003485372678714	0.00787199565211336
ENSBTAG00000020130	-1.57909	1.0719470593051	30.277274184235	3.74488030117927e-08	2.05041276725109e-07
ENSBTAG00000031500	-1.57666	6.13136312424958	26.2438871675817	3.00905782745573e-07	1.44472489961013e-06
ENSBTAG00000006034	-1.57464	1.04249444215415	33.6591784002631	6.56643123530642e-09	3.94574461792138e-08
ENSBTAG00000018984	-1.57361	2.73099459121341	75.5004204768005	3.65329080435247e-18	6.37157677520075e-17
ENSBTAG00000020418	-1.57166	1.16057772987695	26.7350212533223	2.33353599365883e-07	1.13512503709681e-06
ENSBTAG00000002786	-1.57158	2.35828854013441	8.09577905656143	0.00443684632635907	0.00978002747565297
ENSBTAG00000012687	-1.57008	3.56132729236413	32.8263714656193	1.00768487758334e-08	5.90947402786163e-08
ENSBTAG00000017905	-1.56933	3.33489182039642	64.5419731041093	9.44977229201594e-16	1.27494663653035e-14
ENSBTAG00000004907	-1.56917	2.83881269358505	44.9937688345803	1.97662417275263e-11	1.65634928726131e-10
ENSBTAG00000002591	-1.56833	2.54147287030657	39.0944670373567	4.03786711352798e-10	2.87202670157169e-09
ENSBTAG00000016253	-1.5675	1.98082452763884	41.6416307244841	1.09633707550383e-10	8.33728774535608e-10
ENSBTAG00000033313	-1.56247	2.97413833217325	52.0489605913201	5.41338763859377e-13	5.38627048344683e-12
ENSBTAG00000026248	-1.5622	2.3684837047374	29.2824402214298	6.25600493981905e-08	3.31695051826491e-07
ENSBTAG00000005536	-1.55917	3.95437898751778	69.6882504686121	6.94586249184597e-17	1.07972929112377e-15
ENSBTAG00000012504	-1.55889	1.68030229474051	17.0601614869514	3.62140730474257e-05	0.000121956718212461
ENSBTAG00000025213	-1.55867	1.85753760171217	28.2204881940351	1.0825261297072e-07	5.54762315682723e-07
ENSBTAG00000020296	-1.5581	5.13766292619496	124.3006342947	7.23997941355277e-29	3.40596575393715e-27
ENSBTAG00000032852	-1.55725	1.23510188162513	47.0123822328373	7.05396426991408e-12	6.19662741679758e-11
ENSBTAG00000001233	-1.55446	2.41000842677571	36.328961114684	1.66668693975736e-09	1.08872619463078e-08
ENSBTAG00000021752	-1.55256	0.938344373025701	14.8135827851471	0.00011867764366912	0.000362659944727914
ENSBTAG00000030824	-1.55203	0.040210378434049	22.2778006433173	2.35918268814517e-06	9.72879412266249e-06
ENSBTAG00000017727	-1.55179	2.11446297689244	57.6549089390906	3.12382386336712e-14	3.58354382443591e-13
ENSBTAG00000001114	-1.54964	4.78958722724821	64.2536042285228	1.09391639564762e-15	1.46483736076359e-14
ENSBTAG00000015390	-1.54962	2.61718453725518	28.3350992825997	1.02029138674017e-07	5.25126939259838e-07
ENSBTAG00000017452	-1.54866	3.52582056227262	68.2396048903038	1.44788306801413e-16	2.15994350313206e-15
ENSBTAG00000017694	-1.54793	5.92302397831675	62.419534360343	2.77556440834673e-15	3.56962875826464e-14
ENSBTAG00000013884	-1.54699	4.89258834852931	49.1886524702354	2.32491747691843e-12	2.1893823404238e-11
ENSBTAG00000019956	-1.54454	4.42426989926624	43.2288759348009	4.86966794830715e-11	3.86617752875962e-10
ENSBTAG00000009941	-1.5442	1.61661123464522	38.8258604325669	4.63348543478656e-10	3.25679978856623e-09
ENSBTAG00000040206	-1.54355	0.811983240586295	21.2112900080153	4.11334369573239e-06	1.63770321011231e-05
ENSBTAG00000002941	-1.54259	4.6962026861891	32.6755237867538	1.08899944522991e-08	6.36545397794879e-08
ENSBTAG00000012228	-1.54203	6.00184823399851	28.473776884312	9.497617944662e-08	4.91894978630829e-07
ENSBTAG00000032137	-1.54096	1.78987661193285	44.258342894113	2.87775315844698e-11	2.36345944697567e-10
ENSBTAG00000038831	-1.54014	2.57841927779375	59.1184723541009	1.48459017260746e-14	1.75178373942658e-13
ENSBTAG00000006208	-1.53972	6.42245818780003	54.4324921521464	1.60880665855713e-13	1.70514429048258e-12
ENSBTAG00000005373	-1.53918	0.568601214513534	37.344003724269	9.90248746203775e-10	6.6425316146227e-09
ENSBTAG00000004997	-1.53846	-0.0913065174401711	12.6286705547589	0.000379875239614927	0.00105394252977489
ENSBTAG00000016093	-1.53604	5.72631093798039	76.495158084016	2.20753569912205e-18	3.96616882894189e-17
ENSBTAG00000010388	-1.53484	2.14600887551249	32.7982926195969	1.02234599912496e-08	5.98236944168813e-08
ENSBTAG00000021156	-1.53356	2.16183528264224	50.2749680478282	1.33643448534172e-12	1.28561401702021e-11
ENSBTAG00000027916	-1.52923	4.44584349993014	70.0008504112461	5.92788968130341e-17	9.30930376598248e-16
ENSBTAG00000006225	-1.5283	2.96205593365131	65.0612962303876	7.26041595776048e-16	9.9182653682265e-15
ENSBTAG00000016982	-1.52609	3.33567677033674	18.6585421039805	1.56345231666388e-05	5.62171959387755e-05
ENSBTAG00000010994	-1.52516	3.74141700242567	24.0176009175891	9.54590697287189e-07	4.19628681110754e-06
ENSBTAG00000001173	-1.5242	1.42974924075561	13.2357134633351	0.000274665308573561	0.000783526622276601
ENSBTAG00000033731	-1.52269	1.65954766135019	49.8847406211977	1.63047767110223e-12	1.56147352680737e-11
ENSBTAG00000032396	-1.522	-1.43826251758267	8.53214448519285	0.00348928330024388	0.00787916898492964
ENSBTAG00000038104	-1.52184	7.5984229777393	112.72996747753	2.47256864540184e-26	9.53984578797847e-25
ENSBTAG00000017710	-1.52181	3.22673336042004	75.9037582224194	2.97832668996318e-18	5.27153994662461e-17
ENSBTAG00000013905	-1.52123	5.23272012484591	97.9539230609253	4.28232070964476e-23	1.21513682358862e-21
ENSBTAG00000045880	-1.52052	1.34556948142074	12.4917587093423	0.000408751205348608	0.00112764028512582
ENSBTAG00000018940	-1.51828	-0.048968493327666	12.1758663712344	0.000484118085730401	0.00131160661468661
ENSBTAG00000025182	-1.51636	-0.542611674238839	11.9378411099143	0.000550051819351387	0.00147349046312762
ENSBTAG00000020073	-1.51545	0.281418338095273	13.2911475781968	0.000266662210451946	0.000762928479409863
ENSBTAG00000017429	-1.51529	0.401297884477525	19.3875473957689	1.06700542222684e-05	3.96284631537572e-05
ENSBTAG00000005250	-1.51398	3.75145938538322	21.6616721837346	3.25224965330445e-06	1.31487485040873e-05
ENSBTAG00000025226	-1.51257	-0.982670214191947	13.866519617533	0.000196263833941728	0.000576273168042423
ENSBTAG00000038442	-1.51217	-0.660788230875289	15.3091791019275	9.12719307299482e-05	0.000285117183990045
ENSBTAG00000031561	-1.51163	2.91968957289196	77.9141738181097	1.07616384697741e-18	1.98673552886053e-17
ENSBTAG00000009061	-1.50978	6.73982374713101	110.826049317515	6.45972893088777e-26	2.38920870733456e-24
ENSBTAG00000000285	-1.50891	1.09079454915803	24.9573187359186	5.86136042058721e-07	2.67983597064017e-06
ENSBTAG00000015329	-1.50551	1.98985954257442	62.8606775799058	2.21857615572716e-15	2.88441792076721e-14
ENSBTAG00000039601	-1.50527	1.61556033229158	19.5549358670642	9.77478602712297e-06	3.65821196534965e-05
ENSBTAG00000007870	-1.50452	0.44521871750899	12.160560074543	0.000488107178298552	0.00132174642626364
ENSBTAG00000006160	-1.50449	2.34029797622563	43.9732099969689	3.32901255813868e-11	2.71536035730764e-10
ENSBTAG00000007476	-1.50408	3.73305457511639	54.0068050107969	1.99796439742838e-13	2.08871014881255e-12
ENSBTAG00000019903	-1.50255	2.04581646860576	22.940451216101	1.67098188331974e-06	7.06462423353864e-06

## Sheet: DE genes control vs. ST12_up
genes	logFC	logCPM	LR	PValue	FDR
ENSBTAG00000009012	9.29472	11.1688704150963	235.098305194525	4.60828087727473e-53	1.41224059113282e-50
ENSBTAG00000022779	9.18551	1.66814227871187	105.711568025973	8.52880294928641e-25	2.98954053706033e-23
ENSBTAG00000018290	8.85027	1.93137149749649	213.494540815091	2.37402477911064e-48	4.99289995700799e-46
ENSBTAG00000002894	7.86	1.6637341957299	156.369236976879	7.0304273077133e-36	6.85530575477572e-34
ENSBTAG00000004378	7.80359	6.31360584556486	113.581272230008	1.60947369137344e-26	6.7172042076543e-25
ENSBTAG00000013210	7.75615	1.87565664889597	222.860976036357	2.14956040041191e-50	5.24004201245867e-48
ENSBTAG00000020892	7.65813	6.71445560411959	363.21723255056	5.61111741663189e-81	1.20369690821587e-77
ENSBTAG00000002669	7.57713	3.98967943161977	227.53196537354	2.05869569188729e-51	5.66194102338027e-49
ENSBTAG00000020755	7.47913	2.75006961099969	105.968869328513	7.49026967479558e-25	2.64278396486373e-23
ENSBTAG00000004741	7.30354	5.35106780096345	70.8674552778531	3.82048480944174e-17	6.16218346858228e-16
ENSBTAG00000013496	7.19541	5.97238385150662	156.902660937181	5.37551204338262e-36	5.33867983123352e-34
ENSBTAG00000004337	7.12219	4.9267602726898	373.26303106484	3.64535150005225e-83	1.95500200947802e-79
ENSBTAG00000006720	6.88581	0.0617714201476573	96.6056819990554	8.46051267918157e-23	2.49306206035444e-21
ENSBTAG00000001197	6.87789	10.692487872688	303.533975451148	5.59566757056387e-68	4.00127535745788e-65
ENSBTAG00000003827	6.8543	-0.377537375312686	83.6973224645191	5.76632770164254e-20	1.2596666176745e-18
ENSBTAG00000007851	6.79238	-0.547661058762016	71.9071559483509	2.25564463150571e-17	3.71074299348623e-16
ENSBTAG00000000575	6.68805	-0.0240339486888228	46.8865886487128	7.52156657330159e-12	6.6895790269679e-11
ENSBTAG00000002912	6.61771	3.9900879983705	188.392618409553	7.13173789212311e-43	1.12492677398401e-40
ENSBTAG00000025260	6.54684	0.834548310022125	55.5137132740287	9.28093073833752e-14	1.04676407044593e-12
ENSBTAG00000045822	6.52016	1.38529878552956	168.027958440828	1.99477733105967e-38	2.30064318848882e-36
ENSBTAG00000007424	6.46802	6.61904785672692	160.99505642467	6.85874374183852e-37	7.21243974264313e-35
ENSBTAG00000015170	6.44626	-0.0182523968174346	74.8420689008655	5.09914939651699e-18	9.08529508754838e-17
ENSBTAG00000002595	6.42381	1.3245467286192	195.710495682271	1.8027995093007e-44	3.08070645072516e-42
ENSBTAG00000007596	6.27606	3.50015127420525	206.076593465918	9.86006016138971e-47	1.92289100529211e-44
ENSBTAG00000012297	6.2668	3.5657405541638	289.811002921184	5.46684943739817e-65	3.08618037187014e-62
ENSBTAG00000006692	6.22246	1.27827476783519	86.0999484719257	1.71067293492874e-20	3.95445644397536e-19
ENSBTAG00000015060	6.21132	6.651921773502	144.624321057623	2.59474335705689e-33	2.0615716479846e-31
ENSBTAG00000013578	6.17771	5.41557254189033	160.215844913345	1.015053693641e-36	1.04687172288397e-34
ENSBTAG00000002215	6.09639	6.98705612432767	283.488066084917	1.30467575235e-63	6.99697605985305e-61
ENSBTAG00000037800	6.06058	10.4462511040693	306.007264691854	1.6182035023297e-68	1.33514236661449e-65
ENSBTAG00000005033	5.99199	-1.01019628942429	44.7595082727696	2.22782467741381e-11	1.84807791878891e-10
ENSBTAG00000020813	5.86499	0.679987394018088	33.5414407879065	6.97616875631528e-09	3.99927237200629e-08
ENSBTAG00000002349	5.85	0.239286498076989	113.953847773842	1.33377011786216e-26	5.63229066306674e-25
ENSBTAG00000001621	5.7901	-0.291143410558806	110.401014600371	8.00441057618134e-26	3.1448830710667e-24
ENSBTAG00000007927	5.78785	9.26428593553242	191.22670748447	1.71621509044608e-43	2.83201893232687e-41
ENSBTAG00000019975	5.75142	6.50412252355066	93.4931911354974	4.07600288815073e-22	1.10681536653936e-20
ENSBTAG00000001570	5.73794	6.6222463903463	38.9630345555165	4.31906833281959e-10	2.92833925017844e-09
ENSBTAG00000018248	5.66155	1.04544067725499	108.806805584425	1.78900180068394e-25	6.79010134508636e-24
ENSBTAG00000038067	5.55948	0.149453831029209	53.1097928263709	3.15416038427157e-13	3.32333244417455e-12
ENSBTAG00000045588	5.45555	7.07424412700356	155.304510134568	1.2012942143862e-35	1.14027272066428e-33
ENSBTAG00000014113	5.45269	6.67870362591417	78.4178206357532	8.33964252841491e-19	1.62048923477859e-17
ENSBTAG00000016061	5.44767	6.39426401530298	58.9366545992572	1.62830484643925e-14	1.97793859376075e-13
ENSBTAG00000046944	5.40321	6.21841805583317	45.5068113347797	1.52108944181175e-11	1.30313141796109e-10
ENSBTAG00000018069	5.32522	4.32935975133603	136.400552455804	1.63080018682512e-31	1.06658309779794e-29
ENSBTAG00000015632	5.25878	1.19495861057109	93.5249428830341	4.01113651864893e-22	1.09474428241803e-20
ENSBTAG00000004269	5.25649	10.3689939181914	142.251728656502	8.56721703620922e-33	6.38138680072084e-31
ENSBTAG00000006738	5.24626	3.82775821419269	47.1281068089289	6.64952627564917e-12	5.9534907205854e-11
ENSBTAG00000039509	5.24311	0.803361346114384	62.8258966224585	2.25810202198534e-15	3.00128900716416e-14
ENSBTAG00000020602	5.23966	5.15617196900791	101.592221407764	6.82126295990236e-24	2.22385612486057e-22
ENSBTAG00000021516	5.19658	1.63078931519397	19.7807209455478	8.68543396812767e-06	3.01339801044235e-05
ENSBTAG00000008091	5.1718	1.88012930979533	84.5994572734686	3.65365497624672e-20	8.18144118480633e-19
ENSBTAG00000001595	5.14242	-1.31828329939032	57.8877141856086	2.77514977801085e-14	3.28545877692542e-13
ENSBTAG00000003506	5.11478	-0.747842118274264	77.4932221820807	1.33178697700616e-18	2.52827382572886e-17
ENSBTAG00000047600	5.08256	0.603208827003144	99.3835251075373	2.08046078409531e-23	6.54399482997251e-22
ENSBTAG00000014599	5.0661	2.39745098151852	120.038173234083	6.20549887869356e-28	3.09582237083103e-26
ENSBTAG00000010361	5.0228	-0.00312468745249772	47.3827122064037	5.83954285137123e-12	5.25902070728865e-11
ENSBTAG00000022813	5.01704	5.00867980648074	329.053572179097	1.54497509790084e-73	1.50649117273495e-70
ENSBTAG00000002150	4.99647	-1.00761218202474	27.7308947032202	1.39418287183708e-07	6.49891589888071e-07
ENSBTAG00000003994	4.98168	0.105383381528665	106.874934565515	4.74168089680544e-25	1.71821855740321e-23
ENSBTAG00000021945	4.96439	0.509949749340986	89.1378978357002	3.68228805579025e-21	9.03803699917762e-20
ENSBTAG00000014127	4.9562	12.0001270251221	113.11251112138	2.03871687107075e-26	8.37826711076815e-25
ENSBTAG00000005275	4.91181	4.12525305438737	142.687578545879	6.87924655295766e-33	5.23310627851233e-31
ENSBTAG00000001683	4.89239	-0.161057284192453	77.8034242918345	1.1382266852821e-18	2.17622449667305e-17
ENSBTAG00000023718	4.88846	-0.725938196849048	66.3917117308953	3.69653191483463e-16	5.43882048264969e-15
ENSBTAG00000000329	4.86956	-0.794206040774842	51.7554092772485	6.28633937358729e-13	6.42776702774998e-12
ENSBTAG00000008331	4.85112	0.938351716225253	98.4936686053543	3.26065491270947e-23	1.00211417173988e-21
ENSBTAG00000046699	4.84661	3.21736526878275	79.3744344105007	5.1386770748005e-19	1.0169271273858e-17
ENSBTAG00000002085	4.8439	2.0997964059127	108.152389112988	2.4888709112786e-25	9.26931576193551e-24
ENSBTAG00000046375	4.81977	5.02046519953687	28.5696853687174	9.0386222464816e-08	4.36703883854782e-07
ENSBTAG00000015749	4.81725	-0.495315568138864	64.7092061636852	8.68083313712213e-16	1.2101009177057e-14
ENSBTAG00000020242	4.78316	3.92776125750453	161.23550003614	6.07732902185196e-37	6.45400307805784e-35
ENSBTAG00000000016	4.76862	2.83115850863739	168.66369548614	1.44888966061198e-38	1.68921635866566e-36
ENSBTAG00000023659	4.74909	8.82940731748013	138.29221670278	6.29045881322573e-32	4.27034564751007e-30
ENSBTAG00000008021	4.68994	3.32678491978555	113.175952883735	1.97451764091883e-26	8.14564469865208e-25
ENSBTAG00000003113	4.6837	3.40749026177882	100.480876459723	1.19545629683902e-23	3.85058986183042e-22
ENSBTAG00000008294	4.68249	5.51542691197744	257.922202137193	4.86892764414805e-58	2.00861991965892e-55
ENSBTAG00000015163	4.66262	0.784657354946298	49.0643220483691	2.47704973570684e-12	2.32855700834282e-11
ENSBTAG00000002362	4.64811	5.51962375489445	186.447637844047	1.89571307205216e-42	2.86386174800443e-40
ENSBTAG00000008096	4.60379	8.70982138137402	73.8592022925857	8.389239796503e-18	1.45133848479502e-16
ENSBTAG00000025405	4.57587	2.65632444800749	230.455677806644	4.74206249625225e-52	1.37468546850815e-49
ENSBTAG00000001725	4.5528	0.83896843159259	65.6635611019432	5.34856763986945e-16	7.64916486736529e-15
ENSBTAG00000018232	4.52202	-0.0729709066804004	44.0251744944103	3.24179497752412e-11	2.64020447448168e-10
ENSBTAG00000000634	4.51569	-0.936500319760322	32.1241035382951	1.44631736735035e-08	7.82309636016128e-08
ENSBTAG00000031267	4.51088	0.575198624320472	44.2639225552768	2.86956240364824e-11	2.34953636194893e-10
ENSBTAG00000017113	4.42879	0.725439043557599	133.761361356558	6.16135067649379e-31	3.84224693930653e-29
ENSBTAG00000025471	4.42713	9.30917352821926	121.565864291701	2.87303133239918e-28	1.46743495577684e-26
ENSBTAG00000006519	4.38612	-0.716212901890981	65.3778462520669	6.18300614731298e-16	8.7491984084537e-15
ENSBTAG00000010344	4.37892	0.0201930665203412	108.112384925482	2.53961617358218e-25	9.42557891966868e-24
ENSBTAG00000044078	4.3597	-0.751497183996073	31.7598419996249	1.74462933903609e-08	9.31917046339695e-08
ENSBTAG00000009987	4.35477	6.5404927026738	67.501012286664	2.10578944881439e-16	3.1634030291293e-15
ENSBTAG00000017719	4.35101	0.879428957139169	115.215750690508	7.05847442531365e-27	3.09017129330262e-25
ENSBTAG00000003667	4.32144	-0.757199414205393	60.8230844044837	6.24414109227676e-15	7.94479921183398e-14
ENSBTAG00000044208	4.31024	0.962907187961179	138.505423086441	5.65008905815373e-32	3.88580794466263e-30
ENSBTAG00000025250	4.29211	12.1490456679754	86.9691765982438	1.10225730886111e-20	2.59272190676409e-19
ENSBTAG00000027676	4.28973	2.97610337355349	116.864569676633	3.07354709407817e-27	1.40889176744909e-25
ENSBTAG00000014707	4.28524	6.82330722192601	90.0982123089401	2.26626388095124e-21	5.67942672595398e-20
ENSBTAG00000009654	4.27732	-0.849937913336098	19.3411741725636	1.09323365685149e-05	3.72372950250526e-05
ENSBTAG00000019131	4.25895	1.72976560814515	174.25376920996	8.71297033392696e-40	1.05005977305282e-37
ENSBTAG00000015353	4.22067	-0.14507057453045	66.2495249819563	3.97303494106007e-16	5.79792826908984e-15
ENSBTAG00000047904	4.21413	6.5517211890284	106.876876034026	4.73703796215618e-25	1.71821855740321e-23
ENSBTAG00000019665	4.203	11.4100823445645	90.7923101347167	1.59572322914638e-21	4.0751731799581e-20
ENSBTAG00000037811	4.1939	10.0161911574267	87.0198638754034	1.07436689706457e-20	2.53267238195925e-19
ENSBTAG00000018015	4.19017	6.47821448679463	366.612615047315	1.02268494052794e-81	2.74232966802568e-78
ENSBTAG00000019225	4.18868	7.28729895420332	173.260937204533	1.43543601889074e-39	1.71072074873578e-37
ENSBTAG00000034238	4.14595	-1.12557046315056	41.7272921784932	1.04933928286667e-10	7.8215518749325e-10
ENSBTAG00000016388	4.14358	7.74536046164004	112.150613582808	3.31171725578486e-26	1.33039248260481e-24
ENSBTAG00000006685	4.12681	8.26331840285426	298.392136534622	7.38029552966188e-67	4.65653234418549e-64
ENSBTAG00000020762	4.10449	-0.742139740086869	38.2685368532513	6.1648660697044e-10	4.10200703868793e-09
ENSBTAG00000000648	4.10438	0.591803196093583	66.504360550765	3.49120442634565e-16	5.14377179628893e-15
ENSBTAG00000003313	4.09772	-1.19760789130481	33.4697127536522	7.23824135769744e-09	4.13624809817063e-08
ENSBTAG00000014199	4.07249	0.967823230019307	95.803207277138	1.26889979615439e-22	3.63909604640428e-21
ENSBTAG00000004023	4.07177	-0.516046082765364	65.1578471758759	6.9132606423341e-16	9.73118551833013e-15
ENSBTAG00000007191	4.06876	9.57399524088786	90.4151768183699	1.93079408196228e-21	4.89869084925816e-20
ENSBTAG00000025257	4.05012	11.9379925298529	108.089774884059	2.56875335368468e-25	9.50084430055927e-24
ENSBTAG00000021978	4.01627	1.28818934758998	108.486092125004	2.10320946355038e-25	7.86028735402137e-24
ENSBTAG00000014471	4.01513	7.64352655769539	103.407448541838	2.72846990692259e-24	9.14549006926615e-23
ENSBTAG00000006894	3.98901	10.8121647501029	124.634250925515	6.11956238235961e-29	3.33189980269996e-27
ENSBTAG00000021035	3.96337	9.33440421234869	370.569775483243	1.40648976820523e-82	5.02866975125642e-79
ENSBTAG00000040518	3.96085	6.9613557167346	118.758809381706	1.18270481890618e-27	5.62001640574716e-26
ENSBTAG00000016698	3.94584	0.133768015003224	51.9584952416593	5.66862693852871e-13	5.8183437839865e-12
ENSBTAG00000007239	3.90563	1.76597393358803	74.4187634270341	6.31855876142483e-18	1.11652160255425e-16
ENSBTAG00000017718	3.9009	4.67310544290461	43.5512067839651	4.13009424009716e-11	3.28386885243011e-10
ENSBTAG00000021326	3.89642	6.21806922818899	57.5542021287965	3.2879273110129e-14	3.85003366134546e-13
ENSBTAG00000022150	3.8827	-0.997161189608881	44.3430685910873	2.75586041297379e-11	2.26161888213901e-10
ENSBTAG00000040512	3.87655	1.63217192137612	116.864497411352	3.07365908617459e-27	1.40889176744909e-25
ENSBTAG00000032719	3.87617	8.15422710553791	51.0371536783101	9.06341132314914e-13	9.11097936758179e-12
ENSBTAG00000005404	3.87246	0.297143866369284	66.0640672384346	4.36501362975248e-16	6.30136422513124e-15
ENSBTAG00000040161	3.86792	4.56514491208474	69.1823279743259	8.97688061907267e-17	1.38940867994478e-15
ENSBTAG00000018572	3.83669	1.2637094380453	42.1271583605395	8.55271158506627e-11	6.45576245330196e-10
ENSBTAG00000038990	3.83556	5.37787711438147	215.375580046989	9.22858870968828e-49	2.06220505208576e-46
ENSBTAG00000014795	3.83379	-0.823602161367872	49.2411685851351	2.26350094768079e-12	2.13717527859368e-11
ENSBTAG00000005760	3.81902	4.81349669589291	49.4349384413751	2.05060861481824e-12	1.96207207872796e-11
ENSBTAG00000039992	3.81698	10.6545281807129	119.832393207516	6.88379407528864e-28	3.40256107149981e-26
ENSBTAG00000046158	3.81014	8.71216973272596	233.236403971795	1.17370186451995e-52	3.49697949967804e-50
ENSBTAG00000011970	3.79639	6.62059041073478	177.120530824947	2.06135473329441e-40	2.69635254503852e-38
ENSBTAG00000013909	3.79182	-0.9115128566498	26.5761274997221	2.53355059325013e-07	1.13607289561876e-06
ENSBTAG00000011403	3.78339	6.16151587518906	271.372497117266	5.69878465169749e-61	2.65761583365684e-58
ENSBTAG00000000859	3.7802	3.10931684978965	94.6664223074223	2.25329114125445e-22	6.29395853674355e-21
ENSBTAG00000007431	3.77064	0.796291522523973	6.65004764669365	0.00991531729348447	0.0185410901830395
ENSBTAG00000000920	3.75717	4.96600107148148	77.233108435186	1.51925295499668e-18	2.84389305328e-17
ENSBTAG00000000283	3.74708	0.60258208504822	31.3748326778378	2.12720469228195e-08	1.12396046942937e-07
ENSBTAG00000011354	3.7198	8.2126521771938	147.996029057238	4.75334285815971e-34	3.92187349974008e-32
ENSBTAG00000015644	3.71758	0.793242528053355	91.3280900526925	1.21720412763962e-21	3.15355832682671e-20
ENSBTAG00000014857	3.71717	3.40397838428236	62.0139459310773	3.41033522441545e-15	4.46088483135123e-14
ENSBTAG00000012057	3.71137	0.553455244385728	43.8247065122085	3.59142619504904e-11	2.88984526392318e-10
ENSBTAG00000034918	3.70653	2.87510836613921	35.8828680629361	2.09543127207093e-09	1.29095897899097e-08
ENSBTAG00000026278	3.70638	0.929284842258571	51.583524531933	6.86149742177465e-13	6.98481836455116e-12
ENSBTAG00000020095	3.68966	3.0687410377822	53.8836516733988	2.12720335950495e-13	2.30468517515658e-12
ENSBTAG00000004347	3.68318	2.46425716031076	65.4621135951572	5.92419728221651e-16	8.40515080013946e-15
ENSBTAG00000016455	3.6831	0.230639910045622	59.1935382037646	1.4290232821752e-14	1.74575213264364e-13
ENSBTAG00000002908	3.66982	2.57343569797851	35.9678225131575	2.00603062591966e-09	1.24086992466057e-08
ENSBTAG00000006143	3.66305	-0.677245833376225	39.3941797000352	3.46327722141922e-10	2.37210162688011e-09
ENSBTAG00000039513	3.64243	4.8618269659313	85.1366374795653	2.78443130479229e-20	6.32750215576315e-19
ENSBTAG00000010998	3.64208	8.43433835491708	426.542082380538	9.19412714101569e-95	9.86162077145343e-91
ENSBTAG00000009315	3.64119	4.30941265083292	67.6744773890607	1.92843743495609e-16	2.90511515833413e-15
ENSBTAG00000014087	3.63369	3.76948405185436	182.551042792713	1.34414255060972e-41	1.89700960497893e-39
ENSBTAG00000018578	3.61696	5.7924889182513	84.8226565161016	3.2636310845363e-20	7.35414012872613e-19
ENSBTAG00000005475	3.61103	1.75456096211262	34.0508569995606	5.36902561950304e-09	3.1349030372776e-08
ENSBTAG00000014585	3.60363	0.419079630544387	23.2556108268179	1.41836050636998e-06	5.65675820336882e-06
ENSBTAG00000002977	3.59113	9.54872483532473	214.166341735608	1.69406295638591e-48	3.70826923881537e-46
ENSBTAG00000011007	3.57527	2.98489180870684	175.877862452274	3.85040802098003e-40	4.91660433726569e-38
ENSBTAG00000016566	3.56125	4.30753014327875	78.5201223486267	7.9187493321864e-19	1.54214035858389e-17
ENSBTAG00000030575	3.56062	3.92770078086942	45.8379625267851	1.28450012253393e-11	1.11019728560023e-10
ENSBTAG00000012991	3.5579	0.349551779916517	36.1466568944787	1.8301217487924e-09	1.14127243474112e-08
ENSBTAG00000016771	3.55712	7.71043024992597	78.0698991500722	9.94580554167774e-19	1.91523716768466e-17
ENSBTAG00000017150	3.55331	6.06328531978564	198.618046854066	4.18225117345933e-45	7.73428035974565e-43
ENSBTAG00000016163	3.54059	2.17133965434476	86.5973276899149	1.33026781361707e-20	3.10183751496885e-19
ENSBTAG00000009749	3.52661	0.162589690304198	73.6853872773203	9.16145951159374e-18	1.57477267181658e-16
ENSBTAG00000006161	3.52615	-1.07387670799627	30.6119884603372	3.15140468456829e-08	1.62901044080383e-07
ENSBTAG00000000589	3.51759	0.269597727702132	41.7679318932198	1.02775319355577e-10	7.66598105290624e-10
ENSBTAG00000025462	3.50149	4.36439679855634	180.479975896659	3.80735051890771e-41	5.16932172984862e-39
ENSBTAG00000016998	3.49115	2.68715877221374	94.4075668361726	2.5680866876706e-22	7.08105342209637e-21
ENSBTAG00000032152	3.47168	-0.577470428251322	42.4585227845346	7.21971262673389e-11	5.51164680671514e-10
ENSBTAG00000021291	3.46766	2.48027913736673	114.876724419247	8.37449640334421e-27	3.62196969444637e-25
ENSBTAG00000027937	3.46099	10.5253412324842	175.606206689828	4.41395595928996e-40	5.50512693248187e-38
ENSBTAG00000015793	3.44921	3.11379932699836	80.58335634128	2.78696996007275e-19	5.70477858620998e-18
ENSBTAG00000007791	3.44555	-0.502539283262331	36.1479559706456	1.82890214473917e-09	1.14127243474112e-08
ENSBTAG00000003751	3.44219	1.22711288341412	95.5030071962466	1.47666809189825e-22	4.21243137066506e-21
ENSBTAG00000003711	3.42302	2.39283436429871	97.9221433885982	4.35160180673588e-23	1.32224592008637e-21
ENSBTAG00000002813	3.41596	6.96941347036706	301.411097168383	1.62309219468826e-67	1.08808043001414e-64
ENSBTAG00000017751	3.4127	-1.13333520750171	38.6681514214612	5.02339205845236e-10	3.37599644229073e-09
ENSBTAG00000038737	3.4102	0.798159028835308	61.3167473863219	4.8592930823134e-15	6.27205506629285e-14
ENSBTAG00000004443	3.40529	-0.461490926533005	32.5765319762713	1.14590078166896e-08	6.31599783359779e-08
ENSBTAG00000039446	3.39458	3.13453553764796	17.0484733864033	3.64376564457303e-05	0.000112663679168897
ENSBTAG00000008271	3.38842	4.63180365800989	80.8079190932941	2.48759081839662e-19	5.15094577569926e-18
ENSBTAG00000021187	3.38692	7.95402496560579	225.375938252789	6.07878891238645e-51	1.59027048473798e-48
ENSBTAG00000021176	3.38237	3.45366683850688	236.53446605616	2.24062455852895e-53	7.06851147493573e-51
ENSBTAG00000009393	3.3697	-0.0802843040911149	55.8481590923836	7.8290014651216e-14	8.88153680584196e-13
ENSBTAG00000040078	3.35551	6.80910264220886	341.712145605747	2.7039488134243e-76	3.22250610808767e-73
ENSBTAG00000015727	3.35067	0.74786367288324	35.318875659152	2.79906085370479e-09	1.69715809592072e-08
ENSBTAG00000011337	3.34161	0.791051387183417	52.9278203288817	3.46033479089319e-13	3.63521556974734e-12
ENSBTAG00000039688	3.34116	-0.815011192581908	34.0490755927677	5.37394328071783e-09	3.13606722682152e-08
ENSBTAG00000018281	3.32263	1.50724188397977	97.9144520873517	4.36853699546378e-23	1.32364202862555e-21
ENSBTAG00000025258	3.2838	1.29236294374721	46.1288652267486	1.10725033928921e-11	9.63990839222086e-11
ENSBTAG00000018438	3.27435	4.29032417767372	280.136610826716	7.01174798031218e-63	3.58133375413469e-60
ENSBTAG00000017263	3.27334	7.50578662204994	148.144403052237	4.41128776232028e-34	3.66786608826724e-32
ENSBTAG00000009770	3.24943	7.78066120155465	132.843670711823	9.78189944772861e-31	5.99546591293355e-29
ENSBTAG00000013960	3.24751	3.99144898488454	108.64227732453	1.94383971543963e-25	7.31565782028261e-24
ENSBTAG00000018487	3.24151	-0.333505705894069	30.3572673822664	3.59358086063067e-08	1.84072341504893e-07
ENSBTAG00000019036	3.23789	0.973465475241011	39.9148029645957	2.65285063171842e-10	1.84529674940414e-09
ENSBTAG00000017455	3.23084	8.35897554860495	174.676478424299	7.04459187777093e-40	8.68509108976678e-38
ENSBTAG00000013027	3.22148	-1.28168706536549	12.7329224423575	0.0003592747002112	0.00091187421544376
ENSBTAG00000012482	3.21559	3.48649221471105	35.4758606053945	2.58231050274138e-09	1.57553256270785e-08
ENSBTAG00000031430	3.21338	7.75615606529165	113.967404877307	1.32468219096053e-26	5.61602418191409e-25
ENSBTAG00000023851	3.21145	1.89187083063212	100.6317324244	1.10778673093754e-23	3.57895195061328e-22
ENSBTAG00000000861	3.2112	1.06782925398296	59.8616235691552	1.01766551881505e-14	1.26044807792266e-13
ENSBTAG00000017201	3.2034	3.51956309572654	221.918992115344	3.44993211153206e-50	8.22310485073175e-48
ENSBTAG00000011990	3.20184	-1.2341606165755	39.5975311942684	3.12077568922547e-10	2.14986769702199e-09
ENSBTAG00000044023	3.19043	5.18669856986271	262.449666588784	5.01830163812313e-59	2.15305213482035e-56
ENSBTAG00000016525	3.18888	-1.32357305705648	25.6582317129695	4.07553273982891e-07	1.76124754904935e-06
ENSBTAG00000021957	3.18817	5.26450440262652	203.389315776754	3.80397433705589e-46	7.15814539285288e-44
ENSBTAG00000020713	3.18658	3.58135984963564	140.47784232121	2.09277192171037e-32	1.52701167566431e-30
ENSBTAG00000014762	3.18621	1.04379802172427	67.5468308489172	2.05741687313322e-16	3.09507060045258e-15
ENSBTAG00000006999	3.18262	3.08742892450166	91.7183746745588	9.99326515667902e-22	2.62072767898629e-20
ENSBTAG00000010745	3.17994	4.97175531210135	211.098956085437	7.90874635670105e-48	1.63133102734568e-45
ENSBTAG00000015844	3.16858	5.61948805242441	18.5650280513471	1.64205534981254e-05	5.42262490212111e-05
ENSBTAG00000005412	3.14819	7.75192773269035	350.173074951255	3.88552859474256e-78	5.20952246340108e-75
ENSBTAG00000047766	3.13232	3.54256771259756	121.891687236896	2.4379049256782e-28	1.2571619342704e-26
ENSBTAG00000039080	3.12049	1.85729752849559	32.8437019515319	9.98741205453135e-09	5.58524409264355e-08
ENSBTAG00000009064	3.11147	8.34263051902756	86.8238557595792	1.18629919894376e-20	2.78429873257567e-19
ENSBTAG00000000095	3.10008	8.23823427531776	55.8463872665273	7.83606055714644e-14	8.88153680584196e-13
ENSBTAG00000011548	3.09977	0.30673442408806	94.5361946570611	2.40651625007438e-22	6.66984322953431e-21
ENSBTAG00000004305	3.09754	8.00820576279293	116.622330643128	3.47283840683367e-27	1.58509211709353e-25
ENSBTAG00000007783	3.09529	2.7136181557454	128.756605295143	7.66661814886678e-30	4.44498087917541e-28
ENSBTAG00000021249	3.09252	5.05156604351761	63.529493144362	1.57983702173473e-15	2.1504228293308e-14
ENSBTAG00000013489	3.08996	2.71811885579019	119.909403135934	6.62167877079403e-28	3.288154004423e-26
ENSBTAG00000011238	3.08772	8.2466349306347	103.170769861586	3.07469235045636e-24	1.02738785517118e-22
ENSBTAG00000024492	3.08399	1.2460813151714	124.935597141142	5.25735809376355e-29	2.87706239355652e-27
ENSBTAG00000031885	3.08117	6.48906764336285	352.5143915008	1.20115969759872e-78	1.84051984520627e-75
ENSBTAG00000015432	3.08075	1.61449118463528	118.853579274342	1.12752694932184e-27	5.39904199036875e-26
ENSBTAG00000010472	3.07893	0.93039574988209	79.0935626816241	5.92370324686998e-19	1.16156564946851e-17
ENSBTAG00000026637	3.07757	-0.601074876387288	37.6709868820857	8.37408514285573e-10	5.4835431771838e-09
ENSBTAG00000037937	3.07205	2.91583954528141	53.2280825500516	2.96982627064063e-13	3.15389669097934e-12
ENSBTAG00000039922	3.0697	2.87244238050547	49.1515027583694	2.36936779595601e-12	2.23320201928156e-11
ENSBTAG00000001468	3.06846	3.16721916144008	195.70313863775	1.80947703147199e-44	3.08070645072516e-42
ENSBTAG00000034954	3.06444	1.96691369055552	8.24487895893954	0.00408671340103202	0.00829876712220171
ENSBTAG00000005280	3.05415	3.15777670687721	49.7193223803741	1.77390275147945e-12	1.71689815891124e-11
ENSBTAG00000015133	3.05219	4.79066724926127	62.1076051945293	3.25193090758678e-15	4.25887801157214e-14
ENSBTAG00000048171	3.04069	8.99427259216685	21.810152552013	3.01003171388832e-06	1.13362360123477e-05
ENSBTAG00000009455	3.03873	0.985507353930123	59.4241102945673	1.27102280817403e-14	1.5580560731971e-13
ENSBTAG00000002714	3.03566	3.35994380920855	32.8376365377554	1.00186227868773e-08	5.59686187562739e-08
ENSBTAG00000000838	3.02118	6.23654579771734	60.6929281397974	6.67093594916803e-15	8.47777950127681e-14
ENSBTAG00000000559	3.01177	4.90665094845184	20.8350658607034	5.00580180396574e-06	1.81147874997761e-05
ENSBTAG00000016073	3.00773	4.98757262882953	63.6355245598687	1.49705006429721e-15	2.04292099104986e-14
ENSBTAG00000015085	3.00081	-0.377690819033661	27.96474990966	1.23545623777618e-07	5.8120629852576e-07
ENSBTAG00000012066	2.9973	7.73359711725557	162.791845185005	2.7777662477733e-37	3.00952735087035e-35
ENSBTAG00000016208	2.99108	4.36223174776544	90.3286696122875	2.01708526425163e-21	5.10265484536862e-20
ENSBTAG00000015361	2.98757	0.428948448087859	53.6744157064018	2.3662467437945e-13	2.54312250239878e-12
ENSBTAG00000039028	2.98603	1.12275517638116	20.695037684866	5.3855390075544e-06	1.93685809357053e-05
ENSBTAG00000000396	2.97906	8.17185249065045	177.954395909248	1.35541567388459e-40	1.7948380886526e-38
ENSBTAG00000012216	2.96048	5.75911613916925	155.186987872578	1.27447508573781e-35	1.19912454119507e-33
ENSBTAG00000002929	2.94189	0.734539041631148	33.6228392599429	6.69025508550535e-09	3.8435820057381e-08
ENSBTAG00000005766	2.93784	3.16661612575494	54.9052885330182	1.26480214640048e-13	1.40147394858384e-12
ENSBTAG00000014484	2.93683	1.16049441991655	38.3333414051824	5.96349937649723e-10	3.97541916173457e-09
ENSBTAG00000020580	2.9359	8.11473147873763	39.953288554665	2.60109283842569e-10	1.81400011605683e-09
ENSBTAG00000013235	2.93513	0.390862285436187	30.7194576210746	2.98160143747517e-08	1.54795048491571e-07
ENSBTAG00000007449	2.93132	1.07012585619739	42.4406062120984	7.28615177995497e-11	5.55446083808081e-10
ENSBTAG00000008142	2.93081	6.32085097634145	59.7932961910523	1.05361631704209e-14	1.30196873463058e-13
ENSBTAG00000047473	2.92039	2.35185630973617	79.3215329378276	5.27812984179165e-19	1.04260074922757e-17
ENSBTAG00000009786	2.91914	-0.202808436976129	43.8911881738244	3.47148276655931e-11	2.80596263407047e-10
ENSBTAG00000014855	2.91013	6.35540309426635	119.46470205524	8.28566916411833e-28	4.02136142327299e-26
ENSBTAG00000011861	2.90896	0.949742241086282	57.9284934480245	2.71821172964876e-14	3.22160652068647e-13
ENSBTAG00000046409	2.90566	1.67305765637506	30.1542123750601	3.99019563891172e-08	2.03223354335077e-07
ENSBTAG00000013057	2.88976	1.27894202086003	72.2746398615616	1.87238184670649e-17	3.12821926600838e-16
ENSBTAG00000005738	2.881	1.97520517544254	77.3731964541801	1.41522805554031e-18	2.66967988846047e-17
ENSBTAG00000003033	2.87836	1.66870476689116	76.2743535219056	2.46869302529426e-18	4.52635921184721e-17
ENSBTAG00000025124	2.87819	0.807941944800889	50.4745091030034	1.20722693072982e-12	1.1989551906489e-11
ENSBTAG00000008816	2.87073	2.80379267811186	54.4732619677637	1.5757731893953e-13	1.73351212609785e-12
ENSBTAG00000040585	2.83622	0.815048611724435	102.539547729602	4.22841604577265e-24	1.4041483129089e-22
ENSBTAG00000013191	2.80526	-0.265228575749298	49.4076782072455	2.07930223091171e-12	1.98775363001417e-11
ENSBTAG00000019465	2.79056	6.78628093116225	241.065735339815	2.30318993233051e-54	7.72000475443032e-52
ENSBTAG00000004557	2.79034	3.38494892450139	65.821717437269	4.93613119531292e-16	7.07820096269069e-15
ENSBTAG00000019293	2.78931	0.121672928980738	25.1228860391834	5.37906632411358e-07	2.28861028926784e-06
ENSBTAG00000047839	2.78762	0.271571233573834	67.0041921482894	2.70930389251213e-16	4.01936287013625e-15
ENSBTAG00000003312	2.78587	7.51644355006448	331.214900423377	5.22615005827425e-74	5.60556855250496e-71
ENSBTAG00000008419	2.78534	2.17823345216293	48.4080383416255	3.46146399885329e-12	3.2034221614927e-11
ENSBTAG00000020214	2.78431	5.00582302753623	65.2735894692797	6.51891666646778e-16	9.21237156317963e-15
ENSBTAG00000001243	2.7705	-1.36673498613277	17.5390361104877	2.81469090488049e-05	8.90571523473396e-05
ENSBTAG00000033702	2.76812	4.57377140752802	93.3325228887122	4.42067959790668e-22	1.1973790244229e-20
ENSBTAG00000001785	2.76155	15.3157370228913	63.2804425633531	1.79275472454992e-15	2.42485336387421e-14
ENSBTAG00000006561	2.76135	9.10014421888844	115.899397520152	5.00029341833857e-27	2.23471446687915e-25
ENSBTAG00000003701	2.76119	0.652258810934157	47.071817039002	6.84326544918323e-12	6.11673876732828e-11
ENSBTAG00000006707	2.74805	10.301730752354	105.35004906604	1.02357893217307e-24	3.5645803982105e-23
ENSBTAG00000003709	2.7441	6.36969013739768	166.030899525862	5.44648579527133e-38	6.11355058459127e-36
ENSBTAG00000006078	2.74345	1.5958503812669	58.565621964606	1.96622242773908e-14	2.36696989449263e-13
ENSBTAG00000046671	2.74107	4.58774065697144	80.957313929429	2.30646325459114e-19	4.78513053554054e-18
ENSBTAG00000017992	2.73906	8.15348501956951	65.8234207925399	4.93186698488521e-16	7.07820096269069e-15
ENSBTAG00000005960	2.73885	6.75025676250727	191.195889575641	1.74300399060652e-43	2.83264557624933e-41
ENSBTAG00000006965	2.73836	-0.723924036879717	16.5288711297851	4.79149137474304e-05	0.00014456690994513
ENSBTAG00000006136	2.73685	7.45986263198711	130.094135929736	3.90797749965337e-30	2.34172998107721e-28
ENSBTAG00000011156	2.73642	1.90150949526461	60.019058834634	9.39432745661538e-15	1.17030843553608e-13
ENSBTAG00000004581	2.73275	-0.289117997988015	14.4051248278579	0.000147400618585437	0.000404663177616433
ENSBTAG00000010303	2.73155	7.38911016425407	109.879048927058	1.0415591974777e-25	4.01862012667115e-24
ENSBTAG00000016345	2.73129	3.20579636772097	61.0012617369484	5.70382414218769e-15	7.30934501184052e-14
ENSBTAG00000003935	2.71437	9.70302477570599	255.613410914724	1.55138143445586e-57	5.94289902356198e-55
ENSBTAG00000007280	2.70626	6.21977524421184	142.309429457259	8.3219161108722e-33	6.24201903532974e-31
ENSBTAG00000009768	2.70535	2.46595923658461	36.2164840829024	1.76570689327556e-09	1.10726892931839e-08
ENSBTAG00000038048	2.6975	2.13613505657221	94.8463936266676	2.05746702377381e-22	5.7922286868761e-21
ENSBTAG00000001294	2.69603	8.85327202263214	238.28062662807	9.32419120364928e-54	3.03064469243461e-51
ENSBTAG00000020355	2.68918	2.6461990037741	96.186900851459	1.04534246287177e-22	3.01407076794695e-21
ENSBTAG00000021658	2.68666	4.19290983620255	178.567042042883	9.96093122033046e-41	1.33551185336581e-38
ENSBTAG00000005725	2.68229	-1.01237127000348	7.33458305448779	0.00676403673659039	0.0131219131916564
ENSBTAG00000037775	2.67872	9.29317245363615	48.100845173368	4.04851947422244e-12	3.70515527990699e-11
ENSBTAG00000038625	2.67499	-1.1818222344201	22.5952918361322	1.99974062327183e-06	7.77145577000496e-06
ENSBTAG00000045728	2.67362	-0.105918704137744	20.5735034442703	5.73848885664399e-06	2.0496513978143e-05
ENSBTAG00000044082	2.67258	4.37821399590841	39.9483023217677	2.60774120603923e-10	1.81745498219473e-09
ENSBTAG00000005668	2.66438	9.54304291302061	108.760189413235	1.83157524898235e-25	6.91742116921996e-24
ENSBTAG00000005464	2.6634	-0.285103155751403	13.233939223569	0.000274925418689557	0.000715046081683848
ENSBTAG00000008545	2.66285	9.67618529743969	156.842103915177	5.54182003059363e-36	5.45335427964654e-34
ENSBTAG00000002346	2.66147	7.48825303655649	213.881898527889	1.95425648484144e-48	4.19227101128186e-46
ENSBTAG00000022689	2.65617	4.98631395231282	104.143615933058	1.88170000528494e-24	6.42774339384914e-23
ENSBTAG00000009863	2.65559	9.43801403129346	166.021695275338	5.47175886743205e-38	6.11355058459127e-36
ENSBTAG00000012442	2.65295	12.5374096781513	185.603467880241	2.89772296440591e-42	4.25766801592024e-40
ENSBTAG00000019129	2.65286	2.30368549444567	54.346128360883	1.68108885593687e-13	1.8436972462964e-12
ENSBTAG00000005268	2.65255	0.0704223666627681	13.9612738866875	0.000186615168290299	0.000502292169405707
ENSBTAG00000000835	2.64422	-0.0664361447592646	31.3358477862932	2.17034987891131e-08	1.14562858273635e-07
ENSBTAG00000006721	2.64384	4.57207203705284	183.713749856653	7.49208486356799e-42	1.08594732765717e-39
ENSBTAG00000001945	2.64154	9.68068252482167	278.236299185206	1.81945519549209e-62	8.87067110311278e-60
ENSBTAG00000002596	2.64088	7.65525411130413	140.259677949714	2.33576174145204e-32	1.6814349287795e-30
ENSBTAG00000000961	2.63957	0.844702128785898	82.8200892800965	8.9871935934575e-20	1.91643416468042e-18
ENSBTAG00000017404	2.63832	-0.211487294501027	40.5678128994536	1.89909341278207e-10	1.35888431924619e-09
ENSBTAG00000014147	2.63602	-0.723156455834409	24.8332580833876	6.25095948994169e-07	2.63035666885503e-06
ENSBTAG00000008193	2.62728	2.71699883420046	115.465137280269	6.22437190428404e-27	2.73617266579306e-25
ENSBTAG00000004005	2.62253	6.97328584488444	102.459879454276	4.40192961044778e-24	1.45277221543578e-22
ENSBTAG00000016401	2.61923	8.17387553651869	292.390734557788	1.49845649180508e-65	8.92913573950069e-63
ENSBTAG00000016805	2.61785	5.19987908393003	98.5972998504092	3.09440861073283e-23	9.58228944488909e-22
ENSBTAG00000047107	2.61439	7.3162671881341	134.708519365931	3.82378099223296e-31	2.4707153567886e-29
ENSBTAG00000019138	2.61254	3.36535212614568	80.6196859961497	2.73619987369709e-19	5.6223141466044e-18
ENSBTAG00000026309	2.61197	5.73262383086752	164.359639505382	1.26239981232227e-37	1.38168371295599e-35
ENSBTAG00000021240	2.61116	4.0184156710489	24.0588656500061	9.34350712793742e-07	3.82075705124883e-06
ENSBTAG00000020455	2.60726	4.56516042616788	64.0766011937193	1.19674467242457e-15	1.64990788643007e-14
ENSBTAG00000009156	2.60697	-0.287305440565519	42.7521349795001	6.21340340988812e-11	4.78084397234289e-10
ENSBTAG00000002164	2.60499	0.421092923923421	71.4890828336872	2.78796433479343e-17	4.53773982625103e-16
ENSBTAG00000038650	2.60474	4.7839166948794	21.6595660149389	3.25582258039932e-06	1.21976783085446e-05
ENSBTAG00000019636	2.60128	2.22608090858895	24.4704092161043	7.54599074255824e-07	3.12986452840989e-06
ENSBTAG00000046257	2.60124	1.81741163998032	23.9315316586255	9.98233065604559e-07	4.06493844406777e-06
ENSBTAG00000005176	2.59578	1.41537446590802	66.1717751979076	4.13288526993779e-16	6.01483411198816e-15
ENSBTAG00000020936	2.59126	4.12123994705543	196.940376351116	9.71707224429325e-45	1.70861175233261e-42
ENSBTAG00000020283	2.5907	5.72769777645671	69.9657651703479	6.03426988746448e-17	9.46251152236023e-16
ENSBTAG00000016513	2.58607	5.87241854703709	90.7380424798745	1.64009405413354e-21	4.17853891321528e-20
ENSBTAG00000039932	2.58189	4.2513674799333	37.0642814156759	1.14298365551959e-09	7.32793944357626e-09
ENSBTAG00000032425	2.57715	9.54499619309562	29.2553245234311	6.34416549100464e-08	3.14017162235882e-07
ENSBTAG00000010943	2.57481	-0.28252577582725	22.7576014657355	1.83775763564117e-06	7.19145873764582e-06
ENSBTAG00000014831	2.56909	9.20428674672805	69.1878380154135	8.95183631753682e-17	1.38753462921821e-15
ENSBTAG00000040128	2.56752	4.54442852596575	118.081207192987	1.66432519190687e-27	7.76154435147527e-26
ENSBTAG00000004515	2.56631	-1.53800176498489	10.5587117312653	0.00115641763980304	0.00264309757059235
ENSBTAG00000019348	2.56547	6.11369629014146	89.8282666787559	2.59756403647613e-21	6.46437862070603e-20
ENSBTAG00000013863	2.56108	10.2109368745119	304.704687051622	3.11031667381627e-68	2.38294690309667e-65
ENSBTAG00000011981	2.5581	-0.614766943538676	39.9768241908096	2.56994006600891e-10	1.79460788724034e-09
ENSBTAG00000018275	2.55314	1.11871924180204	83.1805812446783	7.48897877745863e-20	1.60975523781606e-18
ENSBTAG00000005439	2.55254	4.05503360141874	99.0202623438013	2.4993145915709e-23	7.83849365765775e-22
ENSBTAG00000020931	2.5499	4.0922587673297	20.2651709680796	6.7416737431537e-06	2.38336165356185e-05
ENSBTAG00000015086	2.54679	-0.444998646792374	42.4682588449283	7.18386352463554e-11	5.48818519695447e-10
ENSBTAG00000039928	2.53908	0.414731930776303	34.3357858102395	4.63775182541586e-09	2.73923601758868e-08
ENSBTAG00000001283	2.53362	7.302834293728	69.8827276192006	6.29371507868431e-17	9.85494714364495e-16
ENSBTAG00000007836	2.53174	5.62039009223418	138.798447665191	4.87498509342273e-32	3.39539546182157e-30
ENSBTAG00000024918	2.52007	11.1238954254355	152.535676928339	4.83894858771967e-35	4.2543084058919e-33
ENSBTAG00000037634	2.51218	1.46554832150624	40.1566390693785	2.34393543359274e-10	1.6476210101785e-09
ENSBTAG00000001325	2.51212	3.32833378773431	46.7224170076961	8.17880512967977e-12	7.23214046339202e-11
ENSBTAG00000000546	2.50968	5.71447881549286	61.2894152339338	4.92722146449334e-15	6.35208863319178e-14
ENSBTAG00000014501	2.50734	2.87438382108227	15.6193260918696	7.7458861948244e-05	0.000224486288369864
ENSBTAG00000009663	2.50671	7.17219381458718	115.510084539904	6.08488327315489e-27	2.68586246863619e-25
ENSBTAG00000004221	2.50373	-1.67973943384096	5.97181185744503	0.0145363374607486	0.0261123355558516
ENSBTAG00000018016	2.49693	5.75109754588749	39.5382376178218	3.21698256408219e-10	2.21188172963754e-09
ENSBTAG00000012137	2.49656	2.1467516478227	78.6233210721431	7.51569081922956e-19	1.46836611524693e-17
ENSBTAG00000012039	2.49425	7.03671844600757	43.5248339707923	4.18613118882287e-11	3.32595875046771e-10
ENSBTAG00000015913	2.48553	3.68298603954152	128.993277320326	6.80484656844287e-30	3.98845815809389e-28
ENSBTAG00000038938	2.48249	1.51013679674442	20.6081560378728	5.63555149837932e-06	2.01691442681403e-05
ENSBTAG00000038797	2.48169	1.06511154461919	16.2313222584054	5.60595399281968e-05	0.000166880702410733
ENSBTAG00000005754	2.47424	1.64182904821139	21.8230706093537	2.98983422205405e-06	1.12720428350621e-05
ENSBTAG00000040133	2.47121	-0.727255382318879	19.4423658794603	1.03681426860352e-05	3.54506529966254e-05
ENSBTAG00000027348	2.46733	-0.698911447566329	21.5989988643699	3.36027184413754e-06	1.25626614849144e-05
ENSBTAG00000019806	2.46712	0.955554283901007	53.975328023411	2.03022970395363e-13	2.20407325957557e-12
ENSBTAG00000012508	2.46088	1.78471127473329	73.9490678530662	8.01588004388108e-18	1.39217024105391e-16
ENSBTAG00000009426	2.45962	6.43070616947743	227.775098436352	1.82207631825189e-51	5.14305015514995e-49
ENSBTAG00000004118	2.45777	7.66075456011052	58.421679737982	2.11546957461676e-14	2.53242485014949e-13
ENSBTAG00000002115	2.45463	-0.790900534268785	25.8638137990825	3.6637333911177e-07	1.59679822645788e-06
ENSBTAG00000006452	2.45415	-0.856544046947229	21.5747494592603	3.40302705312032e-06	1.2700371667282e-05
ENSBTAG00000021378	2.45339	0.487992336421734	15.3335936201115	9.00999634177136e-05	0.00025764121770685
ENSBTAG00000043964	2.45186	1.27622495409339	41.4764459640738	1.19299698229999e-10	8.80666595467973e-10
ENSBTAG00000001198	2.44892	-0.200999150671658	29.1364166866132	6.74570256371434e-08	3.32663934245517e-07
ENSBTAG00000000436	2.4469	9.48741925966224	96.3759271014819	9.50154376618022e-23	2.78452345453686e-21
ENSBTAG00000015127	2.44594	8.63946424975248	208.270004262698	3.2757376300315e-47	6.62935128673922e-45
ENSBTAG00000019929	2.44342	6.96863371934087	49.8378509396587	1.66991187857333e-12	1.62536069052428e-11
ENSBTAG00000044063	2.44004	0.807218236100443	68.2052066220236	1.47336201424629e-16	2.2479773776395e-15
ENSBTAG00000012498	2.43997	0.179831175793535	27.3534534709304	1.69461529393841e-07	7.80104877372676e-07
ENSBTAG00000026111	2.43479	5.35583469492666	60.4338502965738	7.60931059034802e-15	9.59077149143043e-14
ENSBTAG00000006616	2.42834	7.84513186852887	150.8201359366	1.14736259308333e-34	9.69024501843447e-33
ENSBTAG00000016284	2.42761	1.82579466831232	64.0037821831849	1.24180583034164e-15	1.70983431787477e-14
ENSBTAG00000008612	2.42706	4.2015365124262	40.8577858066159	1.63719694203819e-10	1.18332711592329e-09
ENSBTAG00000001470	2.42678	5.09499070754523	54.1427687267215	1.86438738853057e-13	2.03225804160354e-12
ENSBTAG00000002292	2.42239	1.47987134020897	39.8502283435957	2.74202135074372e-10	1.90238816352375e-09
ENSBTAG00000019437	2.41896	1.25309693426648	35.7413887414536	2.25325740278407e-09	1.38342523767956e-08
ENSBTAG00000012854	2.40848	1.10313069557066	62.7698366143541	2.32329817705536e-15	3.08412082266037e-14
ENSBTAG00000039691	2.40695	2.58022305821697	17.2294456814635	3.31261995204769e-05	0.000103350543123179
ENSBTAG00000035995	2.40632	4.20668964297357	61.5422598853615	4.33341791007458e-15	5.64080588634223e-14
ENSBTAG00000027513	2.39365	13.7470548618859	54.0195232787037	1.98507361092633e-13	2.15885201435354e-12
ENSBTAG00000010987	2.38387	9.6308440666928	107.242066015417	3.9398473012548e-25	1.43737422289997e-23
ENSBTAG00000018986	2.38218	6.21532974865977	85.1404594301673	2.77905441436027e-20	6.32750215576315e-19
ENSBTAG00000012738	2.38061	0.0561247896004514	26.8341622854496	2.21683655864345e-07	1.00421685960333e-06
ENSBTAG00000007520	2.3799	7.1379206525342	138.341479448464	6.13633124011683e-32	4.19224769945816e-30
ENSBTAG00000000930	2.37915	1.22704811494596	36.380560923969	1.62314034504597e-09	1.02170207400018e-08
ENSBTAG00000010555	2.37329	3.36519384775023	50.8069183276308	1.01913852024857e-12	1.01875859908538e-11
ENSBTAG00000046320	2.36469	1.97733280570561	35.7135927798018	2.285636755761e-09	1.40250227930735e-08
ENSBTAG00000008330	2.36201	8.21304045248828	270.117621644853	1.06972993310332e-60	4.78080135936091e-58
ENSBTAG00000039326	2.36173	4.62125721546673	43.2463532954788	4.82636397159947e-11	3.77589934058176e-10
ENSBTAG00000021166	2.35738	3.71808273032635	71.6414393815248	2.58079328636295e-17	4.21333162702116e-16
ENSBTAG00000003544	2.35573	2.44131693266031	26.8715578323153	2.17435337737487e-07	9.86553059463741e-07
ENSBTAG00000031962	2.35369	3.88480596237856	76.0766521532738	2.72864513514748e-18	4.97745709516868e-17
ENSBTAG00000006132	2.34993	6.8677200754098	154.597258166266	1.7147702516726e-35	1.58557118271037e-33
ENSBTAG00000009681	2.34928	5.10637326131381	83.7410520645556	5.64017649722025e-20	1.23462312467723e-18
ENSBTAG00000004674	2.34769	-0.838285302095847	21.0917432492315	4.37810519689428e-06	1.60490623178018e-05
ENSBTAG00000019029	2.34645	3.55097350445395	55.2046566674013	1.08611124198674e-13	1.21114845779818e-12
ENSBTAG00000039504	2.34354	2.22369331477201	13.6270800063985	0.000222946350215465	0.000590158576606879
ENSBTAG00000012626	2.34222	5.61647871336628	72.1543523025383	1.99006310664074e-17	3.30936695842303e-16
ENSBTAG00000021515	2.34161	1.42380593022539	26.8063170903529	2.24900957186832e-07	1.01698468245614e-06
ENSBTAG00000044022	2.33909	2.64791825285842	47.1623139375851	6.5344830456889e-12	5.85537720535164e-11
ENSBTAG00000016218	2.33637	-0.742582504311438	24.2925931001778	8.27566788454713e-07	3.41403129729433e-06
ENSBTAG00000015543	2.33635	5.65515671609953	58.0832443488653	2.51257293154067e-14	2.99442858485614e-13
ENSBTAG00000021462	2.33041	12.1741478596004	74.0991047177458	7.42920169991883e-18	1.2957010964769e-16
ENSBTAG00000000900	2.32772	5.81266073291519	83.4950933720094	6.38743124667248e-20	1.38504704898719e-18
ENSBTAG00000027246	2.3274	3.97948271437141	49.8292283952405	1.67726665275153e-12	1.63103917655602e-11
ENSBTAG00000021574	2.32134	3.42556082754285	68.7218755849975	1.13376279231071e-16	1.74723271700067e-15
ENSBTAG00000021609	2.32065	-0.208685360315717	28.9201545625452	7.54240214764621e-08	3.69068455454622e-07
ENSBTAG00000000928	2.31535	4.3719535309334	87.1518801073516	1.0049943883441e-20	2.3848605772962e-19
ENSBTAG00000032068	2.31184	7.09244250445672	14.0578609490971	0.000177271301855546	0.000480154541339037
ENSBTAG00000000704	2.30729	6.63752269355679	223.385672692879	1.65160829704376e-50	4.11980246374218e-48
ENSBTAG00000037508	2.29919	-0.258115502033584	18.7467075393286	1.49280868964467e-05	4.9695425217656e-05
ENSBTAG00000047986	2.29814	0.593442813470135	23.2788270302699	1.40134208410865e-06	5.59597736193201e-06
ENSBTAG00000005090	2.2979	9.83430517355281	144.275325794302	3.09311008842681e-33	2.42165684733329e-31
ENSBTAG00000013699	2.28923	7.64613922361075	256.957681908416	7.90102775371649e-58	3.13875643282826e-55
ENSBTAG00000014548	2.28885	7.34962850901394	83.3166034932485	6.99099503419755e-20	1.50573117945387e-18
ENSBTAG00000014367	2.28774	5.75223287377933	128.426811103081	9.05245340930209e-30	5.22024813269754e-28
ENSBTAG00000024539	2.28569	7.69909528507015	139.585687278756	3.27955777633162e-32	2.329571967479e-30
ENSBTAG00000004329	2.2834	2.1886663446669	67.2298065144009	2.41633157360446e-16	3.59966284145576e-15
ENSBTAG00000031707	2.28174	1.8102237630767	68.486010872989	1.27780860801026e-16	1.95517476883282e-15
ENSBTAG00000002758	2.27677	10.0744266064509	61.1024985611559	5.41793369230065e-15	6.95128669660488e-14
ENSBTAG00000015646	2.27434	4.75401599958729	83.5922561900089	6.08108070584266e-20	1.32572503355424e-18
ENSBTAG00000018773	2.27427	4.92201061667118	42.0509987468959	8.89237622491882e-11	6.70271450375821e-10
ENSBTAG00000013860	2.26764	5.03719572719573	67.4094825797804	2.20585450591762e-16	3.30909026999614e-15
ENSBTAG00000045694	2.25793	-0.709522080887788	15.921163407491	6.60361837688879e-05	0.000193843488534508
ENSBTAG00000013405	2.2542	4.28738038594416	141.856910831213	1.04512607995953e-32	7.73104988527305e-31
ENSBTAG00000018774	2.25242	-0.192480854567614	25.8400877378056	3.7090452653154e-07	1.61457871411416e-06
ENSBTAG00000015580	2.25169	9.06528473946073	118.088286910511	1.6583952245333e-27	7.76154435147527e-26
ENSBTAG00000018785	2.25134	2.41860570188551	109.80047010814	1.0836767861177e-25	4.16613519996361e-24
ENSBTAG00000011997	2.24945	5.193338327414	137.392581284503	9.89539294976054e-32	6.63362404869572e-30
ENSBTAG00000006223	2.24652	6.44368857226643	77.2836661693553	1.480856504882e-18	2.78172799848762e-17
ENSBTAG00000006797	2.24451	4.18175883519173	151.394532407404	8.59324564402776e-35	7.37369222222734e-33
ENSBTAG00000018723	2.24447	2.57300152147653	106.199846565774	6.6661811347962e-25	2.35978412052224e-23
ENSBTAG00000018424	2.24276	1.95275212768497	28.917685125134	7.5520238834895e-08	3.69202407357832e-07
ENSBTAG00000014299	2.2409	6.44066069266174	47.8771062841323	4.53789618494199e-12	4.11789124193636e-11
ENSBTAG00000026429	2.23249	3.24578862990916	51.5828960234887	6.86369434666877e-13	6.98481836455116e-12
ENSBTAG00000014435	2.23104	1.22493751270674	21.2600157072875	4.01009519989703e-06	1.47859336933983e-05
ENSBTAG00000012223	2.22856	2.73389230498132	26.4404784130063	2.71784875483389e-07	1.20911015115505e-06
ENSBTAG00000004549	2.22556	4.63236025181003	112.487447022507	2.79428504576214e-26	1.13528414397139e-24
ENSBTAG00000017363	2.22233	10.9132852520266	181.330338319018	2.48290023009341e-41	3.41430613692076e-39
ENSBTAG00000019070	2.21626	6.53626159019451	52.6545563074854	3.97687226175064e-13	4.14135260966382e-12
ENSBTAG00000009459	2.21208	-0.462481457399394	31.9744096486892	1.56216989260429e-08	8.39470654713107e-08
ENSBTAG00000003820	2.21076	4.64321829571269	127.687306133768	1.31396224899424e-29	7.4569095675726e-28
ENSBTAG00000013451	2.20404	6.30738284924031	108.534901132754	2.05204950421916e-25	7.69590314064849e-24
ENSBTAG00000005124	2.20289	2.12463229493843	70.478311628461	4.65354540614687e-17	7.41663120747865e-16
ENSBTAG00000019472	2.20289	5.73248832926048	56.0698064449147	6.99430346346534e-14	7.98094669671588e-13
ENSBTAG00000047379	2.19648	11.1367836097656	54.9142922460019	1.25902121639094e-13	1.39651102037324e-12
ENSBTAG00000013981	2.19646	9.63753738997409	118.346101767737	1.45625818318088e-27	6.8508005582448e-26
ENSBTAG00000013371	2.1951	10.5732733857363	83.4937018869714	6.3919288574367e-20	1.38504704898719e-18
ENSBTAG00000030940	2.19187	1.91644964031726	26.4394919919445	2.71923701852686e-07	1.20922621313098e-06
ENSBTAG00000005450	2.18978	4.84762602170176	31.96906006291	1.56647786831281e-08	8.40943023799961e-08
ENSBTAG00000020172	2.18497	2.82999399762562	139.729969060139	3.04974594198282e-32	2.18077166491385e-30
ENSBTAG00000014947	2.18468	2.10759026534473	34.3031781337439	4.71610991499731e-09	2.78092330666636e-08
ENSBTAG00000018807	2.18347	-0.322771005530181	16.5988276426684	4.61795583001692e-05	0.000139842445603505
ENSBTAG00000048145	2.17984	3.81163389677902	53.1539487886819	3.08404846187285e-13	3.2590644139949e-12
ENSBTAG00000018332	2.17905	2.60565288133646	31.1994797625411	2.32828464424461e-08	1.22542143658858e-07
ENSBTAG00000047902	2.17642	0.250591923080441	15.9079070067915	6.65003165061982e-05	0.000195045773816101
ENSBTAG00000019547	2.17594	0.66545560469715	23.739015297882	1.10323235814704e-06	4.46707069591738e-06
ENSBTAG00000032089	2.17591	5.08416230862759	110.373697882522	8.11547437158194e-26	3.17688241275868e-24
ENSBTAG00000016291	2.17017	-1.0227817189614	15.8766902290687	6.76062805245378e-05	0.000197964773384164
ENSBTAG00000021497	2.1601	1.53622254205372	29.3291610978047	6.10697240885607e-08	3.0283581163842e-07
ENSBTAG00000010347	2.15881	7.10344391721013	131.436371230262	1.98743667107897e-30	1.20436416576232e-28
ENSBTAG00000020133	2.15407	5.39820360105851	54.0180501002783	1.98656250062181e-13	2.15885201435354e-12
ENSBTAG00000002658	2.15113	5.07694133486229	139.279192248381	3.82684214382377e-32	2.70044137070091e-30
ENSBTAG00000000521	2.14918	3.34244447330365	28.9391034010535	7.46897885512199e-08	3.65976551850336e-07
ENSBTAG00000017721	2.1487	3.96213573918105	145.101054818766	2.04111705523795e-33	1.63380757720017e-31
ENSBTAG00000008665	2.14621	0.518456453738926	17.6679324654082	2.63023703795218e-05	8.37397520601813e-05
ENSBTAG00000039086	2.14587	3.57086682891941	8.80163385995753	0.00300960901359318	0.00629670534012061
ENSBTAG00000046708	2.14338	3.09669132409653	28.4324512310828	9.70252550099056e-08	4.65842831350156e-07
ENSBTAG00000046566	2.14085	1.35047545490956	44.9323555083043	2.03959765322452e-11	1.70645276353247e-10
ENSBTAG00000003528	2.13892	5.42864689770539	44.2004467167895	2.96413635662743e-11	2.42512025638336e-10
ENSBTAG00000008649	2.13797	5.51813799128238	38.5087502752028	5.45087454669693e-10	3.64047823087617e-09
ENSBTAG00000014923	2.13319	4.3003047383776	101.984784538938	5.59498631474306e-24	1.82962875646141e-22
ENSBTAG00000000203	2.13159	8.72608136829194	198.302672917264	4.90043201339123e-45	8.90881928400582e-43
ENSBTAG00000016906	2.13146	8.85073644524791	140.312396499506	2.27457559191279e-32	1.6484525539768e-30
ENSBTAG00000020837	2.12435	-1.13759395022454	10.3955147502701	0.00126321780000891	0.00286575171804052
ENSBTAG00000039892	2.11771	5.62570648090738	86.2798985892877	1.56188085964821e-20	3.6339987203008e-19
ENSBTAG00000020199	2.1042	1.87226699540377	29.047974199111	7.06078974606766e-08	3.47085384126131e-07
ENSBTAG00000009658	2.10377	8.61120734059727	45.1107207481629	1.86203245265936e-11	1.5713737283418e-10
ENSBTAG00000011316	2.10059	6.10131146352698	96.1916162516235	1.04285570597757e-22	3.01407076794695e-21
ENSBTAG00000014215	2.09969	2.05245348466859	50.6992241703968	1.07662109965566e-12	1.07222264762364e-11
ENSBTAG00000009948	2.09419	6.94382881068189	135.816574683066	2.18840843352917e-31	1.42259811260812e-29
ENSBTAG00000012972	2.0935	0.773417673132959	41.2742016296982	1.32303568040876e-10	9.71312847916796e-10
ENSBTAG00000000431	2.08698	-0.497344595654819	20.74533992928	5.24590815975941e-06	1.89007762585084e-05
ENSBTAG00000020661	2.08606	9.01401495000097	39.0792190333622	4.06952695606733e-10	2.77141245274782e-09
ENSBTAG00000020266	2.08594	1.31315494783273	39.2843475226727	3.66366509779959e-10	2.50615254075245e-09
ENSBTAG00000013222	2.08496	0.610154690401624	49.270050578641	2.23041880790918e-12	2.11524952552024e-11
ENSBTAG00000011003	2.0812	1.32217104905552	22.1559517941303	2.51375448153455e-06	9.59862248805254e-06
ENSBTAG00000012902	2.08074	6.79194123205018	221.54976712706	4.15283936872504e-50	9.68333805846625e-48
ENSBTAG00000012261	2.08028	-0.310862688819086	28.3549625019044	1.0098759400447e-07	4.833524914288e-07
ENSBTAG00000039702	2.07694	-1.11375272235778	17.229405305233	3.31269035295068e-05	0.000103350543123179
ENSBTAG00000016137	2.07551	0.11297418899524	21.2827378927809	3.96284059310232e-06	1.46368554413277e-05
ENSBTAG00000004540	2.07437	7.15928331636009	53.0627274913969	3.23064879505793e-13	3.39724891919524e-12
ENSBTAG00000019202	2.07216	6.32452221092306	89.3985647377907	3.22770660902817e-21	7.94045437808168e-20
ENSBTAG00000004086	2.07173	2.45421259026691	27.5048777385121	1.56698807144202e-07	7.24149679202374e-07
ENSBTAG00000003438	2.07036	4.88025282435085	69.5579946164096	7.42003961776696e-17	1.15847663668367e-15
ENSBTAG00000021582	2.0702	-0.785772862224683	16.0723027864049	6.09692753003994e-05	0.000179954993635686
ENSBTAG00000000081	2.06673	5.13037386869198	43.8205837644278	3.59899942486217e-11	2.89376820322876e-10
ENSBTAG00000010976	2.06542	-0.575292311272998	19.6262248451467	9.41677710610173e-06	3.24355655876837e-05
ENSBTAG00000033076	2.06285	6.88381301218508	63.256325026788	1.81483972320605e-15	2.4516336109708e-14
ENSBTAG00000011358	2.05888	8.59959566670014	81.5581179943127	1.70182667726794e-19	3.55132158373072e-18
ENSBTAG00000007718	2.05517	6.88291552344565	227.159084527298	2.48264881518208e-51	6.65722279791074e-49
ENSBTAG00000018784	2.05153	10.4949915710947	116.166184981873	4.37091449592241e-27	1.98654359674847e-25
ENSBTAG00000034138	2.0499	1.67248782877155	23.1938172945123	1.46467470746845e-06	5.8250281469435e-06
ENSBTAG00000002882	2.04775	3.89528973296868	32.277599285905	1.33645215323317e-08	7.26396452177499e-08
ENSBTAG00000002135	2.0441	0.42511664175377	14.737734548693	0.000123548648063928	0.000344650923051676
ENSBTAG00000017839	2.03987	6.0912681326915	72.0869832594508	2.05917577545342e-17	3.41371242156312e-16
ENSBTAG00000000720	2.03977	4.94236153094113	7.15012300258526	0.00749588457485097	0.0144190921717811
ENSBTAG00000000088	2.03919	5.7323507812992	20.6426178919901	5.53501871393287e-06	1.98424501088382e-05
ENSBTAG00000046971	2.03488	1.43397186152455	21.8120914854166	3.00699146593318e-06	1.13287637736562e-05
ENSBTAG00000009602	2.03301	1.76105829062415	79.188608097759	5.64546692617613e-19	1.10903440018618e-17
ENSBTAG00000037558	2.02999	14.1741057803808	58.841421139959	1.70905302933492e-14	2.0666632235227e-13
ENSBTAG00000008188	2.02414	1.6572633239986	40.7737535590269	1.70913253763563e-10	1.23199970421235e-09
ENSBTAG00000006322	2.01864	8.10771944175896	75.6735522925292	3.34660255145106e-18	6.05323085444589e-17
ENSBTAG00000034848	2.01652	-0.164345080614575	18.7198097845423	1.51401414725464e-05	5.03076695893843e-05
ENSBTAG00000012342	2.01296	5.50339340184025	14.4553534718032	0.000143521337071319	0.000395227178800248
ENSBTAG00000005773	2.01116	6.57698757604146	41.2751784383248	1.32237469391641e-10	9.71312847916796e-10
ENSBTAG00000015177	2.00911	2.02906377687339	33.4154428723078	7.44306011116962e-09	4.2465033378939e-08
ENSBTAG00000001666	2.00713	2.53251832283243	38.1703030627572	6.48316366371316e-10	4.29780058448624e-09
ENSBTAG00000047008	2.00129	1.7631453709187	27.3579702350278	1.6906616622354e-07	7.78619020572644e-07
ENSBTAG00000018951	2.00091	9.35418607875623	136.80211472	1.33221185902023e-31	8.76644441708652e-30
ENSBTAG00000006307	1.9974	4.59435872996059	60.1665202203647	8.71622476246531e-15	1.09217554675471e-13
ENSBTAG00000000672	1.99318	8.28578318625419	44.7698647232645	2.21607230437467e-11	1.8411767263147e-10
ENSBTAG00000017124	1.99112	1.73270592413112	58.9825979116765	1.59072588955339e-14	1.93667717268441e-13
ENSBTAG00000013031	1.98992	-0.410337999621361	18.9633990683321	1.33250185637991e-05	4.4691728929115e-05
ENSBTAG00000009368	1.98657	7.23355538358053	189.668422761313	3.75584373468519e-43	6.01271341764676e-41
ENSBTAG00000024387	1.98638	7.90693514155801	138.504907092901	5.65155733141311e-32	3.88580794466263e-30
ENSBTAG00000010564	1.98516	-0.121525962418566	22.4618517919917	2.14358748054682e-06	8.28544840228656e-06
ENSBTAG00000026148	1.98475	6.39960310226243	79.410799087554	5.04496011325966e-19	1.00022628788952e-17
ENSBTAG00000003499	1.98395	2.9504832485254	16.8680124839551	4.00712247250279e-05	0.000122871342595955
ENSBTAG00000005137	1.98358	6.67016389403153	65.5900910842249	5.55171934486448e-16	7.90806662589859e-15
ENSBTAG00000016217	1.97776	4.19224529396528	58.7502085863629	1.79014567064096e-14	2.16228631343412e-13
ENSBTAG00000009850	1.97685	-0.312172337566777	16.1526106047733	5.84379694063097e-05	0.000173246451037059
ENSBTAG00000010463	1.97606	0.354291296525009	21.2166213885764	4.10191788269883e-06	1.50881931446597e-05
ENSBTAG00000015505	1.97389	2.78272834687837	33.7872906488546	6.14791951819918e-09	3.55485632087355e-08
ENSBTAG00000001644	1.97339	3.93080595960623	56.3065000917454	6.20100884469668e-14	7.13648292577431e-13
ENSBTAG00000005990	1.9711	2.02987609273973	33.8183168154905	6.05064907792439e-09	3.50617298810464e-08
ENSBTAG00000031750	1.97015	2.57993419680084	43.5659601654574	4.09907439859156e-11	3.26404394946497e-10
ENSBTAG00000002163	1.96799	3.18530795916824	23.7029754686296	1.12408610218531e-06	4.54807526670677e-06
ENSBTAG00000011227	1.96648	3.27197832671218	23.3470259542598	1.3525247018949e-06	5.41716951177172e-06
ENSBTAG00000001414	1.96524	1.77913249891703	33.2789402374088	7.98426336831775e-09	4.52160553793961e-08
ENSBTAG00000003880	1.96511	11.4415662440644	92.4390261804067	6.9431328515392e-22	1.86180107414024e-20
ENSBTAG00000002478	1.96506	4.38489234381564	91.1746893898756	1.31531990946257e-21	3.39137532425374e-20
ENSBTAG00000004849	1.96463	0.0964891729959044	20.8045021291459	5.08632561892463e-06	1.83786985298782e-05
ENSBTAG00000043953	1.96458	-0.707610958878372	16.792122046313	4.17060861707654e-05	0.000127592549990767
ENSBTAG00000047077	1.96399	6.28589026947061	86.1525637561558	1.66575827320352e-20	3.85894670375398e-19
ENSBTAG00000015316	1.96186	8.47943565182433	160.705673213799	7.93358165076503e-37	8.2617084258355e-35
ENSBTAG00000017797	1.96048	3.97807410496991	24.2261309513396	8.56621258461494e-07	3.52305200086579e-06
ENSBTAG00000005745	1.96006	7.84142711739448	50.2347253587646	1.36412394004504e-12	1.34234801659845e-11
ENSBTAG00000019373	1.95947	-1.3075260073178	12.0146794785013	0.000527831646314126	0.0012976214160819
ENSBTAG00000046054	1.95401	6.02805010345264	97.331079380355	5.86524426616687e-23	1.74267617725501e-21
ENSBTAG00000020382	1.95221	7.22525446722804	48.4368037703087	3.41105983244635e-12	3.16223230447878e-11
ENSBTAG00000010774	1.95214	0.415277457490488	50.6616557998085	1.09742770205698e-12	1.09091839965368e-11
ENSBTAG00000004556	1.94759	12.7176962451161	119.540511550529	7.97499147414674e-28	3.888170843259e-26
ENSBTAG00000013544	1.94606	6.06865290552526	51.9781168962533	5.61226266125861e-13	5.77071071318346e-12
ENSBTAG00000026944	1.9445	6.30465746770195	17.4058376122571	3.01897353084564e-05	9.48769706763855e-05
ENSBTAG00000018334	1.93312	3.38544683471726	29.7759506130932	4.84970862079036e-08	2.44101241983094e-07
ENSBTAG00000020865	1.9324	7.74302203600956	108.994536094411	1.62733835591231e-25	6.21168370303042e-24
ENSBTAG00000019716	1.93079	14.5084228534541	39.7684215914778	2.85930935116796e-10	1.9784322110672e-09
ENSBTAG00000018722	1.93068	8.17022155130093	122.66162869577	1.65378970310797e-28	8.65295041733468e-27
ENSBTAG00000008998	1.93062	6.09233328046333	96.2051561039802	1.03574804334558e-22	3.00254959808776e-21
ENSBTAG00000005160	1.92968	6.677214019015	207.84069506702	4.06421130669301e-47	8.07272786584986e-45
ENSBTAG00000017713	1.92384	7.88782948055759	113.755138328107	1.47435746860662e-26	6.17732742510727e-25
ENSBTAG00000017846	1.92211	4.77468148793984	17.0394606030712	3.66110103634238e-05	0.000113090122709128
ENSBTAG00000005674	1.92095	6.99848858491167	250.033590863893	2.55338657406664e-56	9.12920813114626e-54
ENSBTAG00000045658	1.91595	2.33544560157223	80.6606855974521	2.68001390402332e-19	5.51743361507756e-18
ENSBTAG00000007719	1.91586	-0.754696525389438	10.8718918894309	0.000976347424580954	0.00227362190101071
ENSBTAG00000025853	1.91454	0.814765977001593	60.5945234075619	7.01288442008917e-15	8.88077901887561e-14
ENSBTAG00000039618	1.91429	4.39137792068672	35.6345550072201	2.38027607255203e-09	1.45890520881103e-08
ENSBTAG00000015188	1.9139	6.22523228485615	70.0414830701053	5.80703174972831e-17	9.14628818613596e-16
ENSBTAG00000014764	1.91307	5.1330009338213	36.9303110958674	1.22427767940233e-09	7.83041287374444e-09
ENSBTAG00000015509	1.91252	6.14092014488459	47.3977658515319	5.79486948226144e-12	5.22317395518792e-11
ENSBTAG00000031476	1.91189	3.0991727772587	14.3247279002748	0.000153830862193314	0.000421238148553863
ENSBTAG00000012981	1.91178	3.28809270515371	131.658443677892	1.77709102651333e-30	1.08301581536261e-28
ENSBTAG00000039719	1.90941	1.73938608269257	25.6371173787545	4.12037049685721e-07	1.7791905776687e-06
ENSBTAG00000017855	1.90825	7.09656759928974	34.7746589584505	3.70160362228794e-09	2.21930690065179e-08
ENSBTAG00000046076	1.90605	-0.629752789618992	10.5757371612659	0.00114581569226098	0.0026243901591269
ENSBTAG00000002579	1.90345	5.19145902999617	78.0470790457501	1.00613727168266e-18	1.93055963793708e-17
ENSBTAG00000008063	1.9031	3.24931706997896	42.8176349873068	6.00880283383444e-11	4.63005885026639e-10
ENSBTAG00000011651	1.89639	0.291443859302256	22.4338196534428	2.17510103273458e-06	8.40120045988876e-06
ENSBTAG00000014553	1.89146	8.0753135797626	156.242641619073	7.49281906015567e-36	7.24035830984052e-34
ENSBTAG00000005923	1.8865	4.05790361573542	63.9247781571844	1.2926162418199e-15	1.77523710752373e-14
ENSBTAG00000017289	1.88456	-0.621448038692524	22.0759776603442	2.6206889395812e-06	9.97852664747885e-06
ENSBTAG00000014091	1.88443	5.22035667480699	35.9361863320128	2.03886727170901e-09	1.25900347474674e-08
ENSBTAG00000017007	1.88442	3.04357300915452	79.5890453218653	4.6097432433328e-19	9.19035428029509e-18
ENSBTAG00000020350	1.88317	4.4359937150869	44.4679140457382	2.58560209826839e-11	2.12840891066974e-10
ENSBTAG00000004425	1.87911	0.221197647784804	24.1983209312687	8.69080160020397e-07	3.56745265839218e-06
ENSBTAG00000018280	1.87857	3.9568007236344	9.61619281770227	0.00192869149925606	0.004190225849913
ENSBTAG00000046014	1.87646	0.719403256157131	34.6166160365752	4.0146477124159e-09	2.38830345886705e-08
ENSBTAG00000019839	1.8764	-0.364694820134626	23.7498377880876	1.09704621037336e-06	4.44537878823749e-06
ENSBTAG00000006836	1.87625	4.38407664085645	40.8331893672137	1.65793309593171e-10	1.19670191029365e-09
ENSBTAG00000003172	1.87458	2.51778714477902	19.4936456051162	1.0093489586461e-05	3.4566656866022e-05
ENSBTAG00000036016	1.87321	6.67049243579493	32.500093824868	1.19186776311786e-08	6.54916681721422e-08
ENSBTAG00000016711	1.87244	3.39390757172993	72.0179767059357	2.13245837339642e-17	3.52430639646378e-16
ENSBTAG00000007714	1.87018	3.85144893110365	24.8876169282626	6.07715339734058e-07	2.56224635769949e-06
ENSBTAG00000002416	1.8691	0.493135067337149	13.512441008864	0.000236987073562602	0.000624091173835618
ENSBTAG00000010665	1.86842	1.19462693637079	29.567085535744	5.40144171820193e-08	2.6959452707973e-07
ENSBTAG00000002959	1.86529	6.85333956663363	119.391944049405	8.59521908536397e-28	4.13418474931004e-26
ENSBTAG00000024947	1.86446	-0.977404287635811	10.6504214206527	0.00110045828577002	0.0025302284186858
ENSBTAG00000015046	1.86154	3.4382388893394	29.0717613377243	6.97462331823991e-08	3.43006922106562e-07
ENSBTAG00000008192	1.86104	-0.242512567960473	15.8714865084747	6.77924314870915e-05	0.000198401533459903
ENSBTAG00000016335	1.85965	0.700143220617959	28.5499460408788	9.13123726881258e-08	4.40187195259702e-07
ENSBTAG00000008916	1.8579	1.77685777630548	18.6300086676698	1.58702681930683e-05	5.25708760465875e-05
ENSBTAG00000035735	1.85694	5.21966950407077	75.7333040659001	3.24684882724609e-18	5.88271968260838e-17
ENSBTAG00000023629	1.85587	2.52764966561995	78.0553021427934	1.00195747325165e-18	1.92598492080595e-17
ENSBTAG00000014402	1.85402	3.92760607443619	20.5721763733976	5.74246829373696e-06	2.05038997731767e-05
ENSBTAG00000013825	1.85046	0.459722179322987	15.0049587648899	0.000107229042885337	0.00030227035847257
ENSBTAG00000006282	1.8487	3.7025349251146	35.9749252243934	1.99873149145423e-09	1.23706831952326e-08
ENSBTAG00000017812	1.84726	-0.584977057359933	19.6911073586054	9.1023957862224e-06	3.14537039958188e-05
ENSBTAG00000019039	1.84596	0.683474192108484	41.2350555755058	1.34979901485054e-10	9.8825557906395e-10
ENSBTAG00000031287	1.84498	4.2561779674869	30.5599364724402	3.2370970333388e-08	1.6684816328492e-07
ENSBTAG00000032122	1.84469	2.89042159543354	25.7996028406584	3.78766401711142e-07	1.64479693309867e-06
ENSBTAG00000015963	1.8432	2.849441441584	62.400742971696	2.80217494285427e-15	3.69694076716542e-14
ENSBTAG00000038756	1.84102	1.95334499276222	15.2383614002951	9.47588962110662e-05	0.000269740955615684
ENSBTAG00000004608	1.839	1.69515508900153	17.3411947963559	3.12342068922145e-05	9.79585096859334e-05
ENSBTAG00000017571	1.83445	2.04909171106947	48.1507942417745	3.94669054173452e-12	3.62123205736907e-11
ENSBTAG00000002690	1.83197	5.69439054533171	38.2139969993149	6.33960371737134e-10	4.20745480139786e-09
ENSBTAG00000014375	1.83158	1.41150934767344	41.3740152705975	1.25717451482291e-10	9.24859660218831e-10
ENSBTAG00000022294	1.8291	-0.0644205805256461	14.6014179446598	0.000132814571872909	0.000368200852393079
ENSBTAG00000007740	1.82865	-0.697983381072898	15.3936708571984	8.72801434910167e-05	0.000250085875104061
ENSBTAG00000002554	1.82786	0.847385311475269	37.5214885157589	9.04114027360423e-10	5.87017376360042e-09
ENSBTAG00000022895	1.82721	3.57881059731314	68.5716071296377	1.2235310151491e-16	1.87479909549846e-15
ENSBTAG00000026369	1.82691	0.62245068886327	32.3082003586917	1.31556959952081e-08	7.1592082823238e-08
ENSBTAG00000017425	1.82556	5.7089814170887	23.0330368337263	1.59241325099085e-06	6.29801789458991e-06
ENSBTAG00000020080	1.82449	-0.596069314983522	15.8825717588739	6.73965013919596e-05	0.000197458310278656
ENSBTAG00000001022	1.82301	4.83182725952062	64.7077855407504	8.68709403909553e-16	1.2101009177057e-14
ENSBTAG00000003581	1.82299	1.05943535629611	21.0134783189455	4.56063696961907e-06	1.66442300565274e-05
ENSBTAG00000009417	1.82281	7.99286290047482	120.11786652905	5.96114536427389e-28	2.98781519519634e-26
ENSBTAG00000010923	1.82275	5.95711448700277	176.007484715056	3.60745918902336e-40	4.66188039294754e-38
ENSBTAG00000019274	1.82219	6.33852170551105	24.7788930631305	6.42977049034192e-07	2.69713407428265e-06
ENSBTAG00000004059	1.81736	9.83722901048866	123.710788757507	9.74624944442844e-29	5.14966854881475e-27
ENSBTAG00000007649	1.8129	2.60579083471332	121.220311944936	3.41967186532057e-28	1.73836020983073e-26
ENSBTAG00000006347	1.8125	3.88962121940663	68.5821303197073	1.21701936087619e-16	1.86748922242604e-15
ENSBTAG00000012599	1.81224	2.18985745018221	50.235522173148	1.36357015022157e-12	1.34234801659845e-11
ENSBTAG00000000670	1.81114	2.02525538845247	39.6860574452282	2.98247111865992e-10	2.05855760738393e-09
ENSBTAG00000004218	1.81108	-0.288020094019267	13.6377947941694	0.000221677643267786	0.000587234972015379
ENSBTAG00000010664	1.81072	-0.179902215930807	22.149091745713	2.52275291503844e-06	9.62612869679913e-06
ENSBTAG00000001788	1.8101	10.9349438580463	96.4509834790942	9.1480847555124e-23	2.68828375582537e-21
ENSBTAG00000007867	1.80973	9.29429147251427	79.306772049036	5.31771194426128e-19	1.04848857195122e-17
ENSBTAG00000008313	1.80609	-0.0893701861068232	26.877527513081	2.16764746286301e-07	9.83926647764227e-07
ENSBTAG00000009496	1.80506	5.22949385812327	97.5827351170122	5.16523385460377e-23	1.54755023252737e-21
ENSBTAG00000037452	1.80446	-0.445590542946905	10.3129177527837	0.00132102260058343	0.00298741058694031
ENSBTAG00000016991	1.80329	-0.0644906828007298	17.9591457417408	2.25697353096071e-05	7.26321574950033e-05
ENSBTAG00000011446	1.80092	6.08488783023232	114.499750143666	1.01279008257653e-26	4.32796271940869e-25
ENSBTAG00000018577	1.80074	3.51593128759468	37.6210467993156	8.59124673829054e-10	5.60521365662435e-09
ENSBTAG00000009785	1.79952	4.5766340210834	79.0029281959018	6.20179438125635e-19	1.21387676155758e-17
ENSBTAG00000017090	1.79862	4.50525825198342	63.8390278614225	1.35012210342581e-15	1.85184267024876e-14
ENSBTAG00000006896	1.79842	1.85163689044498	8.12412455976102	0.00436800707513364	0.00882487170613739
ENSBTAG00000017763	1.79754	8.28925540873216	153.013802234491	3.80413962696646e-35	3.37216542469771e-33
ENSBTAG00000022715	1.79659	3.95501558781048	12.7550592403864	0.000355047505048284	0.000901998943426786
ENSBTAG00000004723	1.79201	5.34431671256199	48.5045810857472	3.29518226899828e-12	3.06717596854569e-11
ENSBTAG00000009167	1.79183	5.52135636730442	126.061656077032	2.98076984572946e-29	1.64802769924197e-27
ENSBTAG00000011256	1.79157	0.392101980267574	14.7010056247143	0.000125979228916626	0.000350883720945138
ENSBTAG00000001580	1.79083	-0.549439773433849	10.8751906647808	0.000974609952340669	0.00227056176125239
ENSBTAG00000012829	1.78996	4.376078825986	51.2338992960429	8.19904581950676e-13	8.28868665975773e-12
ENSBTAG00000001447	1.78721	3.0608786652387	22.3045403771351	2.32655862273938e-06	8.92513154059463e-06
ENSBTAG00000013577	1.78658	7.73677629164916	59.1937513956856	1.42886846946352e-14	1.74575213264364e-13
ENSBTAG00000010634	1.78465	-0.668333191650449	10.9250370514698	0.000948733057135518	0.00221508723788323
ENSBTAG00000007960	1.7833	8.0991546495498	53.1851355216394	3.0354711279591e-13	3.22042169322348e-12
ENSBTAG00000000507	1.78094	2.76376012014759	31.8652582306797	1.6524646835429e-08	8.84006792802054e-08
ENSBTAG00000004427	1.77975	8.49177149510077	51.1486259123274	8.56306010234935e-13	8.63227280618413e-12
ENSBTAG00000004511	1.77955	2.84623102935223	51.6620178224821	6.59258640398725e-13	6.73448397801592e-12
ENSBTAG00000001592	1.77954	7.13131974384575	77.0738932225168	1.64679831872324e-18	3.06659006365025e-17
ENSBTAG00000004266	1.77878	-0.247604594733298	20.4529159625379	6.1116369746073e-06	2.17424272602448e-05
ENSBTAG00000009641	1.77775	2.29752919893598	26.1760642309193	3.11661810812745e-07	1.37341190746816e-06
ENSBTAG00000013988	1.77734	3.75024699787092	44.5339601441986	2.49983166664921e-11	2.06255341972918e-10
ENSBTAG00000031824	1.77353	4.22752781645182	91.1945543028845	1.30218132109058e-21	3.36558960241387e-20
ENSBTAG00000026375	1.77037	-0.175245847047565	12.975524844604	0.000315589380658215	0.00081175340454197
ENSBTAG00000024815	1.76663	7.0901240349476	97.1600165061515	6.39449768594775e-23	1.88945956417288e-21
ENSBTAG00000018688	1.76552	2.81773403336072	41.0253108460253	1.50270483836808e-10	1.09126689887177e-09
ENSBTAG00000013675	1.76537	0.418704155648343	15.5960753175751	7.84171844053107e-05	0.000226895797122029
ENSBTAG00000015915	1.76479	-0.317221536175099	16.3723368842112	5.20392188126951e-05	0.00015578360619173
ENSBTAG00000007390	1.76381	6.23317358043728	55.669128491917	8.57544318500543e-14	9.68212669498613e-13
ENSBTAG00000016933	1.76	2.21019152250705	28.3163897098805	1.03020033828188e-07	4.92640607597481e-07
ENSBTAG00000007101	1.75742	9.79925356855393	11.2815423842459	0.000782814919175747	0.00185968390322903
ENSBTAG00000012745	1.75538	2.01572724069496	43.2442853440852	4.8314676004549e-11	3.77713713429149e-10
ENSBTAG00000017683	1.75534	-0.158673247293696	19.3900813710186	1.06559057583507e-05	3.63765898039688e-05
ENSBTAG00000011419	1.75318	7.38144279472795	127.776739761355	1.25606720214176e-29	7.20458652950402e-28
ENSBTAG00000003081	1.75305	4.22636505272631	110.240075105835	8.68136882911789e-26	3.3737812340985e-24
ENSBTAG00000014261	1.75267	8.80011727321843	106.486170506989	5.76937154582142e-25	2.06964144483212e-23
ENSBTAG00000011971	1.75181	7.92534632291017	41.9192346121516	9.51223073448167e-11	7.14483101246852e-10
ENSBTAG00000002745	1.75078	5.64199948333561	113.789236685423	1.44922042442181e-26	6.09581893033269e-25
ENSBTAG00000010549	1.75007	8.56202301676436	61.8992576884987	3.61485791501113e-15	4.72265115668812e-14
ENSBTAG00000015678	1.74966	1.97050994120832	40.2471475771377	2.23781843170252e-10	1.58330082443544e-09
ENSBTAG00000018981	1.74962	1.07065544448816	48.3796507075154	3.51193689039213e-12	3.24453359916848e-11
ENSBTAG00000008100	1.74654	0.924249659012785	18.9938486351664	1.3114054884831e-05	4.4053038739335e-05
ENSBTAG00000008259	1.74478	9.92790275462712	35.1688048200327	3.02327861010105e-09	1.82485573280495e-08
ENSBTAG00000005012	1.74315	7.98402333916157	58.0065288765523	2.61249274882774e-14	3.10316691294866e-13
ENSBTAG00000023054	1.74278	5.03577577349069	50.2147027483315	1.37811387936479e-12	1.35363090385226e-11
ENSBTAG00000009216	1.74	2.48143528765799	29.9267713319801	4.48674886794904e-08	2.27042880550158e-07
ENSBTAG00000002341	1.738	4.01440582210594	45.1410563996098	1.83341093473162e-11	1.54965844648789e-10
ENSBTAG00000005998	1.73739	6.93350308895958	99.743764735577	1.73445827516658e-23	5.50408268030672e-22
ENSBTAG00000048226	1.73473	-1.0633662338484	9.61644200885981	0.00192842981264423	0.004190225849913
ENSBTAG00000011338	1.73407	1.38932839651458	16.4818980728169	4.91167869176816e-05	0.000147943458713579
ENSBTAG00000003290	1.73052	-0.136048429078886	10.1086678834377	0.001475735931482	0.0032949091592581
ENSBTAG00000000936	1.72928	0.980451160651955	22.2518491360813	2.39128387237136e-06	9.16359800466423e-06
ENSBTAG00000002444	1.72819	-1.21172085194335	9.88642595795849	0.00166502451411805	0.00367470225070581
ENSBTAG00000015710	1.72803	-0.678557785857881	11.0196088105515	0.000901530944758365	0.00211410218411081
ENSBTAG00000004855	1.72758	9.05567372925683	57.6037515564556	3.20613503734238e-14	3.75836113776332e-13
ENSBTAG00000019574	1.72566	1.37277842477972	10.0313520417954	0.00153898031113996	0.00342257989162083
ENSBTAG00000025441	1.72419	3.26688822851595	27.0951840839474	1.93679841821543e-07	8.82877171006319e-07
ENSBTAG00000006729	1.72407	5.17632976544728	26.2146853400231	3.05490514048063e-07	1.34972207259348e-06
ENSBTAG00000015195	1.72385	8.40198038656523	157.953342103957	3.16837020354134e-36	3.20603196256457e-34
ENSBTAG00000009482	1.72366	5.54461995340986	29.8671522297882	4.62685476504992e-08	2.33651808897954e-07
ENSBTAG00000031160	1.72332	2.61840604492555	17.978481184723	2.23416338204228e-05	7.19844891432426e-05
ENSBTAG00000003668	1.72259	1.85206541323513	11.7310509100431	0.000614658736730841	0.00149192794980199
ENSBTAG00000006125	1.72008	6.29246805451801	90.4140531285837	1.93189094651893e-21	4.89869084925816e-20
ENSBTAG00000010652	1.71952	-0.290582054965737	12.9058990579574	0.000327548161643006	0.000839970395004053
ENSBTAG00000006663	1.71814	5.8848970535426	114.897739756184	8.28621543162877e-27	3.59829743804252e-25
ENSBTAG00000017482	1.71786	0.381890273599069	19.3434416413673	1.0919362730523e-05	3.72167412289768e-05
ENSBTAG00000002922	1.71752	4.38263762995211	89.5719151515062	2.95692116815313e-21	7.30781945843558e-20
ENSBTAG00000005841	1.7166	6.07322153307972	53.5732119205867	2.49133394247942e-13	2.6748796663698e-12
ENSBTAG00000037756	1.71575	1.75540524341892	16.9670927369937	3.80333444894861e-05	0.000117057576181988
ENSBTAG00000004954	1.71424	0.412060290862445	18.3294018292969	1.85817140418923e-05	6.07644709796758e-05
ENSBTAG00000039129	1.71385	2.42998543370036	48.439626349036	3.40615372172548e-12	3.16041564180169e-11
ENSBTAG00000009019	1.71231	6.81486213919594	63.732835080038	1.42489707074839e-15	1.95190880981446e-14
ENSBTAG00000034159	1.71224	1.43968667732162	18.398715884973	1.79178691464345e-05	5.88781486252066e-05
ENSBTAG00000002615	1.70972	4.64625225231957	126.129386123445	2.88075414293536e-29	1.60098284648314e-27
ENSBTAG00000009020	1.70961	2.93228092356827	36.5185763598795	1.51218215655594e-09	9.56348220001122e-09
ENSBTAG00000018488	1.70645	6.26389270627227	113.196109651725	1.95454653966197e-26	8.09438848819084e-25
ENSBTAG00000005030	1.70588	5.0387255254384	153.677163529622	2.72446905666781e-35	2.43522125848491e-33
ENSBTAG00000020921	1.7025	1.12572159798793	16.3586473262192	5.24164559675021e-05	0.000156781624848697
ENSBTAG00000014791	1.70237	0.415827621037882	24.4125504488325	7.77604593653358e-07	3.22154765219232e-06
ENSBTAG00000033662	1.70114	-0.000536232125195859	23.593036531492	1.19017441639675e-06	4.79377048076287e-06
ENSBTAG00000000432	1.69955	-1.1951150304407	7.93199632012559	0.00485681825251219	0.00970509538061268
ENSBTAG00000036061	1.69773	1.71544922091936	5.47682405247338	0.0192702401430194	0.0335757952849294
ENSBTAG00000006719	1.69688	2.28505163663187	45.7805237204385	1.32272127320507e-11	1.13955890573474e-10
ENSBTAG00000020700	1.69591	2.75231154127464	66.3076994785922	3.85748918482692e-16	5.64466971302232e-15
ENSBTAG00000046324	1.69498	7.48193459052308	22.5367343246236	2.06163265781812e-06	7.99749435361922e-06
ENSBTAG00000003526	1.69477	2.98225118514817	55.499559545608	9.34799581996581e-14	1.0532206214806e-12
ENSBTAG00000015258	1.69312	4.00698134935978	43.5871038957733	4.05502461673016e-11	3.23136657050874e-10
ENSBTAG00000001246	1.69264	10.1332729228985	121.915438169619	2.40889391711204e-28	1.24820271279922e-26
ENSBTAG00000021435	1.69168	7.43180132787706	88.4905612410849	5.10780192749468e-21	1.2339253034754e-19
ENSBTAG00000016903	1.68753	-1.29531309385831	7.99664513015641	0.00468641004475853	0.00939383930855541
ENSBTAG00000015398	1.6848	0.885231354073056	22.2475265319448	2.39667320931736e-06	9.1809703011207e-06
ENSBTAG00000003845	1.68402	3.31345493318661	53.548367552183	2.52303981619398e-13	2.70135393778358e-12
ENSBTAG00000046339	1.68323	1.91466993797251	36.5946904292807	1.45427296102933e-09	9.2081061275092e-09
ENSBTAG00000012817	1.68089	9.19520765852802	117.166236331242	2.63987379983615e-27	1.22048648176907e-25
ENSBTAG00000010644	1.68087	4.89255515056616	41.4502584132544	1.20908577562228e-10	8.91929438055333e-10
ENSBTAG00000013298	1.68012	4.06549173338301	39.1119785471459	4.0018115821747e-10	2.72702865504484e-09
ENSBTAG00000011415	1.67991	8.66949319276136	100.391905167223	1.25038075662708e-23	4.01544431005452e-22
ENSBTAG00000017632	1.6792	-0.454009471112595	18.5299741017075	1.67253232371648e-05	5.51817339408887e-05
ENSBTAG00000000641	1.67606	0.187675155936665	15.8567071695787	6.83239442080869e-05	0.000199793518423102
ENSBTAG00000003959	1.67484	0.802736813650157	22.6349457695935	1.95889043757769e-06	7.62375139095004e-06
ENSBTAG00000017038	1.67335	4.00186513065137	112.374835042845	2.95758936813049e-26	1.19709824764406e-24
ENSBTAG00000007523	1.67254	6.94684616835038	80.0916380488533	3.57441889907802e-19	7.26121536202857e-18
ENSBTAG00000046266	1.67068	2.51685213546135	32.5357302836416	1.17021194916418e-08	6.4334666154459e-08
ENSBTAG00000047389	1.66907	2.5834173613891	20.680437620678	5.4267605503782e-06	1.94999777766689e-05
ENSBTAG00000001890	1.66775	3.44852051368258	29.0781880886566	6.95152440631787e-08	3.42027755881493e-07
ENSBTAG00000048268	1.66757	1.72627708211338	11.1647941595732	0.00083364217993501	0.00197082786466452
ENSBTAG00000003559	1.66677	4.78887330258125	96.3441438509423	9.65530566239773e-23	2.82187489195853e-21
ENSBTAG00000007668	1.66633	0.58629802054528	28.4690334187944	9.52091571702606e-08	4.57737973916726e-07
ENSBTAG00000031701	1.66573	1.74605062130754	19.1949848251265	1.18023055540238e-05	3.99216428169218e-05
ENSBTAG00000008204	1.66485	2.3456342128965	28.6907662206112	8.4907619798951e-08	4.12463374077694e-07
ENSBTAG00000006270	1.66467	10.7138918148826	85.2271649392151	2.65982504288957e-20	6.07006030000712e-19
ENSBTAG00000024162	1.66457	-0.373290624908402	16.1010593979156	6.00504342613685e-05	0.000177585044909688
ENSBTAG00000046161	1.66433	0.308193062304303	12.210251792173	0.000475276192470391	0.00118032239880468
ENSBTAG00000006013	1.66142	4.41609512151634	58.5626869616207	1.96915776599313e-14	2.36784598632761e-13
ENSBTAG00000010171	1.66138	5.58192087227479	121.199322891359	3.45604314831868e-28	1.74856220796539e-26
ENSBTAG00000017457	1.661	6.23832907094138	77.262436863194	1.4968596001509e-18	2.80687343902422e-17
ENSBTAG00000047868	1.66001	2.75293699892429	20.9190037509856	4.79117777368895e-06	1.74026998986074e-05
ENSBTAG00000009996	1.65899	5.84240272750583	79.705585675726	4.34570366570531e-19	8.68007775015926e-18
ENSBTAG00000021064	1.65871	6.15983109450236	97.688882644047	4.89563322829903e-23	1.47501578670605e-21
ENSBTAG00000046174	1.65788	4.47540446246688	46.4394926505439	9.44917004957921e-12	8.29392781929514e-11
ENSBTAG00000036242	1.6551	0.976473007120487	41.4920141882497	1.18353411668662e-10	8.74282846803077e-10
ENSBTAG00000006368	1.65481	1.92133437772116	16.8216975993118	4.10611312246132e-05	0.000125691122578539
ENSBTAG00000003531	1.65326	-0.382398611434275	9.05817012675905	0.00261523575536081	0.00553711383971576
ENSBTAG00000038770	1.65323	-1.05899326599131	8.05222066149626	0.00454479116420296	0.00915100995442856
ENSBTAG00000005523	1.65229	-0.443088210860639	13.423052473217	0.000248550924477013	0.000651372794482242
ENSBTAG00000007758	1.65194	0.880978151922677	6.59101312441044	0.0102494826535663	0.0190960484526927
ENSBTAG00000021964	1.65147	-0.85607348023095	10.2036789352565	0.00140160760938059	0.00314708880431573
ENSBTAG00000027444	1.65056	6.40265667440209	70.826362262791	3.90089567006604e-17	6.2824334770463e-16
ENSBTAG00000001489	1.64769	6.09034132541957	32.4369117610923	1.2312541520981e-08	6.74141502572955e-08
ENSBTAG00000021875	1.64738	0.124129732191394	22.3253984376275	2.30142506560815e-06	8.84453072508529e-06
ENSBTAG00000013108	1.6462	6.80815937810438	31.5506257236853	1.94307754470418e-08	1.03124442080638e-07
ENSBTAG00000003665	1.64595	-0.28186597218844	12.2241086666196	0.000471759260993352	0.0011732181389786
ENSBTAG00000023611	1.6459	0.703271398194378	14.9807399215473	0.000108614102764652	0.000305868520629865
ENSBTAG00000012020	1.64154	0.00939868310645552	15.5786719734762	7.91422923809302e-05	0.000228932100344622
ENSBTAG00000009159	1.64145	7.34602373369866	70.033235574857	5.83136209289853e-17	9.17114220064951e-16
ENSBTAG00000005260	1.64061	7.87430346929964	8.68488442697441	0.0032085992445305	0.00666707390484969
ENSBTAG00000000993	1.64033	5.14520660747762	29.8907359901611	4.5709159949701e-08	2.3104450971748e-07
ENSBTAG00000016873	1.63899	6.38707616418803	116.042400499849	4.65242579096712e-27	2.09907581148905e-25
ENSBTAG00000001085	1.63826	4.88536383962737	41.819489727413	1.00100632800553e-10	7.48208632347549e-10
ENSBTAG00000022395	1.6381	4.60989573411437	18.0772993024369	2.12115333718978e-05	6.86941144163574e-05
ENSBTAG00000017040	1.63797	1.08327545837506	23.355745057354	1.3464077228594e-06	5.39468406252891e-06
ENSBTAG00000000020	1.63787	-0.800761342389924	14.4709927843992	0.000142334587539856	0.000392664811201775
ENSBTAG00000019767	1.63776	5.15003553543099	66.5845733054592	3.35199131842239e-16	4.95226706355352e-15
ENSBTAG00000001579	1.63741	6.65401900037058	149.383057290246	2.3648876885105e-34	1.98170198023153e-32
ENSBTAG00000019432	1.63726	3.4697095176802	55.2043835239243	1.08626218198942e-13	1.21114845779818e-12
ENSBTAG00000000656	1.63547	2.86352308305632	51.457942181137	7.31474631239769e-13	7.43677430775143e-12
ENSBTAG00000037989	1.63473	5.20616374745198	25.8096383957223	3.7680213233093e-07	1.63736864475538e-06
ENSBTAG00000037383	1.63384	8.29403346216458	67.2742188161568	2.36250696252518e-16	3.52928268524305e-15
ENSBTAG00000019310	1.63267	-0.0377886668251597	27.1721392196287	1.86121568698913e-07	8.50229959908238e-07
ENSBTAG00000017310	1.63242	2.14125794982656	32.4677021744512	1.21189980870117e-08	6.64902166144692e-08
ENSBTAG00000007816	1.63179	1.30724368944182	7.49516913195595	0.00618647208245727	0.0120911260124702
ENSBTAG00000015731	1.63151	7.23548463098546	94.1481340790544	2.92772498389103e-22	8.03140106834148e-21
ENSBTAG00000015591	1.63045	9.14572130871084	108.804002757047	1.79153335880984e-25	6.79010134508636e-24
ENSBTAG00000013858	1.62848	5.39110306585881	110.257596717666	8.60497329133431e-26	3.35625249174007e-24
ENSBTAG00000031020	1.62584	3.77391881385208	21.4942798188031	3.54885687566471e-06	1.32032739675268e-05
ENSBTAG00000006510	1.62543	5.76862596748418	97.4526176245193	5.51605672322783e-23	1.64347845592616e-21
ENSBTAG00000013855	1.62201	4.99087869201187	40.6678086109914	1.80435301809257e-10	1.29628201420367e-09
ENSBTAG00000001314	1.62119	3.99106342772617	77.3486905977674	1.43289682953643e-18	2.6963598936154e-17
ENSBTAG00000009211	1.61975	4.56839809778147	49.7821786853205	1.71797343721111e-12	1.66911078691362e-11
ENSBTAG00000002432	1.61781	5.81648545882892	32.175957005824	1.40822659646595e-08	7.62090740347818e-08
ENSBTAG00000022396	1.61648	13.3332004818492	43.4578790017076	4.33183958630797e-11	3.42649789105747e-10
ENSBTAG00000014653	1.61639	5.64305623907623	103.877504210934	2.15219284071697e-24	7.3283874315969e-23
ENSBTAG00000003458	1.61589	0.616667048183217	14.0039187653233	0.0001824300247754	0.000492510557699707
ENSBTAG00000017564	1.61563	-1.37268357614307	9.49456965147522	0.00206080914041313	0.00445222506578119
ENSBTAG00000031648	1.61563	0.650575870485816	22.1729144669174	2.49164228113349e-06	9.52436033764712e-06
ENSBTAG00000012768	1.6152	5.72509542565089	130.227346628741	3.65432167518835e-30	2.20203675775675e-28
ENSBTAG00000010433	1.61481	7.53847934294453	10.2352317157645	0.00137783303153148	0.00309889643451596
ENSBTAG00000038283	1.61463	6.09919830880857	143.961390494372	3.62269882005516e-33	2.81572953216751e-31
ENSBTAG00000006552	1.61356	2.14050296822767	9.56225850142496	0.00198618594778077	0.00430728477070291
ENSBTAG00000014102	1.61128	6.4430068841703	44.8978126746724	2.0758963453192e-11	1.73546876070879e-10
ENSBTAG00000000460	1.61049	-0.0707313217114463	21.9631323305533	2.77938530030209e-06	1.0537888558162e-05
ENSBTAG00000048011	1.60871	-0.557488244031635	17.121063571359	3.50711869049253e-05	0.000108878017580963
ENSBTAG00000021396	1.60856	2.19721294388503	32.1005472665085	1.46396069732383e-08	7.90258804202084e-08
ENSBTAG00000000243	1.60794	0.211900360650595	7.68750918038786	0.0055604316470197	0.010969503374275
ENSBTAG00000011786	1.60469	4.26233396711562	54.7725559448377	1.35317221604055e-13	1.49630156590216e-12
ENSBTAG00000007608	1.60333	2.59506728194592	27.2485582496617	1.78908487065011e-07	8.1902365866808e-07
ENSBTAG00000006731	1.60198	4.33281986446848	72.0486362860477	2.09958228009669e-17	3.47532708893782e-16
ENSBTAG00000035975	1.60096	-0.247318817337763	12.2599303343397	0.000462788785897994	0.00115211608694653
ENSBTAG00000020160	1.60048	2.87333595497348	56.0872780608035	6.93242415011008e-14	7.92720484371863e-13
ENSBTAG00000030974	1.60003	3.35147980580655	41.2560531102258	1.33537674659757e-10	9.79032876555402e-10
ENSBTAG00000047707	1.59927	0.829814310301692	14.4869028071625	0.000141137433267758	0.000389863535727522
ENSBTAG00000005997	1.59816	3.28026153641558	11.4252948612653	0.000724509265076249	0.00173191138337594
ENSBTAG00000009655	1.59733	4.33773597236635	15.2510456266846	9.4124632177588e-05	0.00026814895212133
ENSBTAG00000017801	1.59636	9.17299577448267	143.822108344549	3.88583477197056e-33	2.99852257296088e-31
ENSBTAG00000010169	1.59397	6.69978844094243	60.9384134863843	5.88884989957604e-15	7.52846293478577e-14
ENSBTAG00000015804	1.59348	4.08115044078053	29.1511255993708	6.69468387188149e-08	3.30299812372589e-07
ENSBTAG00000019892	1.59347	0.611095640224598	6.58063545007116	0.0103094082174966	0.0191843706698246
ENSBTAG00000007840	1.59249	8.29070553788776	112.315174692169	3.04793923870016e-26	1.22902993512398e-24
ENSBTAG00000007784	1.59069	7.32663962942243	87.7670330774264	7.36360731957847e-21	1.75906574854785e-19
ENSBTAG00000014972	1.59038	4.09296557565553	66.3081396487875	3.85662786149513e-16	5.64466971302232e-15
ENSBTAG00000018653	1.58958	6.02108996399245	99.5030305660159	1.95863404924544e-23	6.17891435653136e-22
ENSBTAG00000005043	1.58881	7.7782439674893	17.6994156621563	2.58706061694795e-05	8.24630376742457e-05
ENSBTAG00000017639	1.58791	6.18456420178679	86.7453382950227	1.23434414931091e-20	2.89073697500194e-19
ENSBTAG00000023601	1.5875	1.59224169564361	40.3587140878811	2.1136061397447e-10	1.49937430257286e-09
ENSBTAG00000035379	1.58718	0.921860644082101	38.5092411923959	5.44950361746279e-10	3.64047823087617e-09
ENSBTAG00000004104	1.58619	1.66416092844535	30.1684792962215	3.96094987819895e-08	2.01829683579867e-07
ENSBTAG00000015318	1.58459	3.73332421397789	47.8455005132814	4.61164226228247e-12	4.17774281294272e-11
ENSBTAG00000018855	1.58293	6.20978987755084	104.617249974545	1.48161297020987e-24	5.10989733712895e-23
ENSBTAG00000013215	1.58267	2.69410860500776	9.99622797789789	0.00156861194338561	0.00348270165695593
ENSBTAG00000017074	1.582	3.38581213630363	35.1946580099035	2.98340799906889e-09	1.80281882805707e-08
ENSBTAG00000027879	1.58124	6.27767925717912	59.8804849911999	1.00795944788765e-14	1.24986971538069e-13
ENSBTAG00000015386	1.57864	4.83310546830529	26.1264761627705	3.19769119595444e-07	1.4074040118099e-06
ENSBTAG00000023375	1.5786	5.83097747307765	84.3396412610375	4.16676325257452e-20	9.27234494753408e-19
ENSBTAG00000011880	1.57771	2.76626048889379	63.4572927728663	1.63881562364068e-15	2.22224227296712e-14
ENSBTAG00000017287	1.57577	8.40074910161547	97.1711536205134	6.35863123777449e-23	1.88405189658478e-21
ENSBTAG00000005299	1.57562	3.02560654821578	19.2192150367102	1.16534481051225e-05	3.94928544630471e-05
ENSBTAG00000046672	1.57035	7.08930444765868	134.63410884589	3.96980625201006e-31	2.54970909335688e-29
ENSBTAG00000004976	1.57032	0.822452174765027	15.4890853279659	8.29830414121297e-05	0.000239074967012222
ENSBTAG00000003359	1.56902	8.66481634170525	16.2046091561489	5.68556137806665e-05	0.00016902253697656
ENSBTAG00000004257	1.56813	0.204910198081641	14.7947272299779	0.000119870197552904	0.000334912148724264
ENSBTAG00000011532	1.56737	5.57347039668258	52.5578148108719	4.17767073372289e-13	4.34623630358018e-12
ENSBTAG00000007374	1.56681	9.89333476527596	115.187924654367	7.15821550578071e-27	3.12109835426845e-25
ENSBTAG00000016908	1.56646	5.15428955386273	63.1429483269612	1.92236483099989e-15	2.58387032297053e-14
ENSBTAG00000012449	1.56582	-0.679550004406392	13.2623538564656	0.00027078942039291	0.000705486354902685
ENSBTAG00000023377	1.56566	5.66678864556808	134.218733647869	4.89359744171958e-31	3.10584178460853e-29
ENSBTAG00000047529	1.56335	-0.0625954082395945	12.3496968367751	0.000441058090192134	0.00110274803622397
ENSBTAG00000032808	1.56166	1.1296689103106	39.1765843173828	3.87155658805511e-10	2.64330464439714e-09
ENSBTAG00000019601	1.56021	3.38617666116581	19.3458667958594	1.09055037677187e-05	3.71813202201368e-05
ENSBTAG00000003395	1.55852	5.92712424836251	109.989196131187	9.8526264637786e-26	3.81513615344727e-24
ENSBTAG00000005973	1.55844	4.02436425263198	32.5988110351217	1.13284028554246e-08	6.25043462074505e-08
ENSBTAG00000007485	1.55671	0.169012742376582	15.6720067791963	7.53308920545693e-05	0.000218673653092641
ENSBTAG00000021358	1.55577	3.35350332573523	29.9702650920791	4.38722656695817e-08	2.22683713922308e-07
ENSBTAG00000016644	1.5556	7.45995465495815	48.3868038834635	3.49914963078262e-12	3.23550680515296e-11
ENSBTAG00000020904	1.55456	2.65273035795214	32.7021529536811	1.07418176380917e-08	5.95435328093909e-08
ENSBTAG00000046503	1.55448	0.0486845479695676	13.7217759847495	0.000211982329272345	0.000563919261849001
ENSBTAG00000007922	1.55392	1.77392558474113	20.4338097370705	6.17295537006756e-06	2.19460123630575e-05
ENSBTAG00000001298	1.55181	0.695699070360131	16.5340390503298	4.77845038275994e-05	0.000144214009019367
ENSBTAG00000005028	1.55053	1.64156353674247	48.8994447942861	2.69427002001154e-12	2.52611365687445e-11
ENSBTAG00000037510	1.54952	-0.356306697260154	12.1974406678687	0.0004785512451403	0.00118708155767226
ENSBTAG00000048253	1.54828	-0.774690021030074	10.2868432148668	0.00133982112343451	0.00302418378997445
ENSBTAG00000016680	1.54825	4.7976112475976	119.42687183317	8.44520088289688e-28	4.08032543558342e-26
ENSBTAG00000031814	1.5458	11.8648057252333	60.2073197663619	8.53741200287937e-15	1.07227495483471e-13
ENSBTAG00000002979	1.54412	-0.255025997568275	17.0627675937573	3.61644087603741e-05	0.000111947892745678
ENSBTAG00000001154	1.54309	0.341359548129414	23.0965789757809	1.54064570848081e-06	6.10678709133969e-06
ENSBTAG00000023028	1.54255	8.59037623053089	90.1497569915097	2.20798497063273e-21	5.54633414402966e-20
ENSBTAG00000012371	1.54057	4.69788399044174	20.6963804261548	5.3817637538514e-06	1.93642395249279e-05
ENSBTAG00000045854	1.53834	6.17963744127806	82.2827966629772	1.17944229337683e-19	2.48540236517876e-18
ENSBTAG00000012317	1.53805	10.1463591079413	15.4819033892135	8.32989468614379e-05	0.000239920650922606
ENSBTAG00000031686	1.53695	3.48826437882211	103.607276349242	2.466695994038e-24	8.32005699121118e-23
ENSBTAG00000002326	1.53586	9.01600785404635	51.2515064399157	8.12583540321738e-13	8.22242552216129e-12
ENSBTAG00000002963	1.53491	-0.669870760175564	10.3062364944403	0.00132581388469068	0.00299635055355925
ENSBTAG00000032132	1.53489	1.03989378429368	15.1522773733812	9.91786127378893e-05	0.000280831520651162
ENSBTAG00000010785	1.5347	2.14291386619648	46.8950338476501	7.48922462896586e-12	6.66634218840563e-11
ENSBTAG00000048054	1.53321	2.58331337412476	31.618953595883	1.8758973035317e-08	9.97564426260835e-08
ENSBTAG00000017096	1.53221	4.43790038277724	81.2322918679728	2.00685808534153e-19	4.17972035405306e-18
ENSBTAG00000047699	1.53141	5.48530379225923	41.2095698070744	1.3675136919891e-10	9.99860385840156e-10
ENSBTAG00000046928	1.52906	0.649401443220006	22.0247762328594	2.6915354752797e-06	1.02228787209101e-05
ENSBTAG00000012178	1.5278	0.408694044287562	11.4909482942624	0.000699359458197707	0.00167739927294915
ENSBTAG00000011921	1.52733	-0.568214874298742	7.07902892507337	0.00779912638877297	0.0149301141613384
ENSBTAG00000014068	1.52655	7.42291140736353	103.619113341091	2.45200249796335e-24	8.29658637008041e-23
ENSBTAG00000003014	1.52628	5.35392841657915	46.2536854982816	1.03890941592659e-11	9.08177864321811e-11
ENSBTAG00000004225	1.52593	4.29007845752909	43.3021054769831	4.69078495539366e-11	3.68326203744893e-10
ENSBTAG00000008353	1.52589	8.40065434794658	82.7601889316219	9.26370716698502e-20	1.97147863240241e-18
ENSBTAG00000016915	1.52533	8.83171375854489	11.36912534264	0.000746750344939538	0.00177952548318629
ENSBTAG00000009279	1.52198	5.96343283450307	19.1970584280521	1.17894920787357e-05	3.98978464655058e-05
ENSBTAG00000002280	1.52123	7.51120954810736	26.1923307397013	3.09047484240584e-07	1.36357191113308e-06
ENSBTAG00000018718	1.52102	3.39521505354851	32.8541311853512	9.93397397188041e-09	5.5582579458732e-08
ENSBTAG00000001079	1.51902	2.41367689605711	13.1464499065572	0.000288064518396017	0.000746503992344934
ENSBTAG00000010136	1.5179	5.44247430731232	72.8418434581352	1.40466928877228e-17	2.36894383512131e-16
ENSBTAG00000006543	1.51785	7.72363632753579	97.6553107631933	4.97934361944124e-23	1.49603472442932e-21
ENSBTAG00000001146	1.51385	6.79721218588664	49.9717020001907	1.55979327445771e-12	1.52371062493929e-11
ENSBTAG00000002660	1.51151	2.72846660636356	54.2173100081394	1.79498613918392e-13	1.96259136889773e-12
ENSBTAG00000017611	1.51031	3.20954172962282	38.4791061362694	5.53430155627094e-10	3.69389660812458e-09
ENSBTAG00000007334	1.50926	6.26850173519029	74.219615011662	6.98923648113313e-18	1.22494363556591e-16
ENSBTAG00000011104	1.50894	7.74953809588597	93.913295877312	3.29652291018126e-22	9.02002671801129e-21
ENSBTAG00000009214	1.50837	6.86736538414824	42.5967299006	6.72717570740612e-11	5.15029883209408e-10
ENSBTAG00000007430	1.50755	3.26211393399572	38.1190391475412	6.65575037349501e-10	4.40404555867412e-09
ENSBTAG00000021980	1.50706	2.85096770616525	20.8079577010815	5.07715670393107e-06	1.83544262913261e-05
ENSBTAG00000003842	1.50381	7.24040758833169	116.009201676492	4.73096345091405e-27	2.12319305332653e-25
ENSBTAG00000018347	1.50349	0.6069374246282	8.70162405677997	0.00317926667148996	0.00661894687857168
ENSBTAG00000004082	1.50347	-0.605045544844884	14.6696454491543	0.000128092591217749	0.000356214968473316
ENSBTAG00000018255	1.50302	5.75708671604556	31.6053273843283	1.88910630684457e-08	1.00309674491163e-07
ENSBTAG00000003222	1.5029	1.50359554700057	33.7306396113625	6.32958509945269e-09	3.65202419455242e-08
ENSBTAG00000010355	1.50049	6.86594918398773	46.9428538797302	7.30869960687011e-12	6.51646816153689e-11

## Sheet: DE genes control vs. ST12_down
genes	logFC	logCPM	LR	PValue	FDR
ENSBTAG00000002980	-6.66322	1.80953277427448	75.0669639356508	4.55016550225544e-18	8.14775879418895e-17
ENSBTAG00000030424	-6.60085	0.261376615170441	72.8472212072678	1.40084700395776e-17	2.36621810463794e-16
ENSBTAG00000004150	-6.47071	2.58159852353114	107.314413198156	3.79861753125103e-25	1.39057923686684e-23
ENSBTAG00000003327	-6.34344	-0.209570282440685	78.2974575241035	8.86358657441262e-19	1.71918317535533e-17
ENSBTAG00000020433	-6.32259	4.77282554676853	145.564233915346	1.61661649487194e-33	1.30374650556364e-31
ENSBTAG00000039980	-6.2892	-0.0818091641896868	46.7372645173697	8.11707295423185e-12	7.18347561939693e-11
ENSBTAG00000014546	-6.25582	0.571319240394921	49.725012982957	1.7687651321532e-12	1.71380079561656e-11
ENSBTAG00000018240	-6.03328	-1.55798167821595	37.4778370870891	9.24576383120261e-10	5.99939884171078e-09
ENSBTAG00000015888	-5.90423	-1.2543425091284	37.9665494514098	7.19680046848586e-10	4.73866677869732e-09
ENSBTAG00000013586	-5.83795	0.119131649136613	49.7179287739253	1.77516320924163e-12	1.71689815891124e-11
ENSBTAG00000047363	-5.68689	1.39620120491208	62.8542979159734	2.22577395133765e-15	2.96935962712035e-14
ENSBTAG00000013664	-5.66424	2.13268058901982	157.506814476211	3.96648064840094e-36	3.97611882567742e-34
ENSBTAG00000018920	-5.59853	-1.3925150053328	45.443329315289	1.57119744730096e-11	1.34284173862551e-10
ENSBTAG00000020070	-5.42215	1.42799498745237	87.3319424573964	9.17540293405629e-21	2.18215902152301e-19
ENSBTAG00000034323	-5.40551	1.08166922716756	35.6351127182682	2.37959471340449e-09	1.45890520881103e-08
ENSBTAG00000016255	-5.32601	0.997047540761878	152.156275892985	5.85694034591594e-35	5.10744245124345e-33
ENSBTAG00000008497	-5.30109	0.717231065220007	193.211784821569	6.32845747081128e-44	1.06060991924878e-41
ENSBTAG00000007302	-5.30033	-0.306825957582569	26.4027455927145	2.7714625419959e-07	1.23193979384368e-06
ENSBTAG00000008248	-5.15332	2.10481799047179	115.877143248813	5.05672052878405e-27	2.24520624885447e-25
ENSBTAG00000009717	-5.11288	5.55479003899461	90.3120721934121	2.03407707628646e-21	5.13353193417613e-20
ENSBTAG00000019066	-5.09344	1.20830356689908	60.9071521497	5.98310787624635e-15	7.63077468259434e-14
ENSBTAG00000047650	-4.96592	-0.870385738037805	30.5945179619603	3.17990968413037e-08	1.64295333680069e-07
ENSBTAG00000021501	-4.95491	3.26032662190405	169.466294459531	9.67685311571434e-39	1.14059259911156e-36
ENSBTAG00000019669	-4.95141	6.7998063767393	43.9717181882462	3.3315508032682e-11	2.70304189983773e-10
ENSBTAG00000007592	-4.92475	1.70454980040348	144.44690360527	2.83715524503286e-33	2.23759758516342e-31
ENSBTAG00000010888	-4.91759	4.87793030268685	355.738534760202	2.38517868734537e-79	4.26390443341108e-76
ENSBTAG00000005828	-4.90808	3.93915903960258	152.114193466895	5.98229994263487e-35	5.17468945037916e-33
ENSBTAG00000019866	-4.88267	4.29384525385812	166.090144261505	5.28658208392836e-38	6.03232759917187e-36
ENSBTAG00000002296	-4.85595	5.4240326271576	151.07587600945	1.00879810856598e-34	8.5875940575228e-33
ENSBTAG00000007415	-4.8456	3.91321798201645	45.4508873546163	1.56514609870969e-11	1.33873660723765e-10
ENSBTAG00000006539	-4.76286	-1.93881265474549	38.0496356402236	6.89675893665278e-10	4.5522853141254e-09
ENSBTAG00000022509	-4.75219	-1.61340221172479	37.6556696514655	8.44010039267931e-10	5.52003151291941e-09
ENSBTAG00000014284	-4.58518	0.393513044846992	84.1592206946559	4.56489970157311e-20	1.00954874637264e-18
ENSBTAG00000021880	-4.52695	0.767632203835486	92.3864587362598	7.13002958922429e-22	1.90714956044937e-20
ENSBTAG00000040427	-4.47995	0.463542680132654	78.2903369750846	8.89559439137222e-19	1.72227699353535e-17
ENSBTAG00000007780	-4.44614	-0.66886734855357	41.8726274330568	9.74168780520924e-11	7.30184090836298e-10
ENSBTAG00000009513	-4.37518	9.73574697937402	74.8777778886751	5.00775006498704e-18	8.93729237887703e-17
ENSBTAG00000000140	-4.36499	0.801170086573437	39.7363276550368	2.90668312125713e-10	2.00753916024495e-09
ENSBTAG00000019741	-4.36337	1.42944308685121	25.4448047275705	4.55221883061625e-07	1.95386551329291e-06
ENSBTAG00000015596	-4.36309	-1.11891862048322	20.5739960993626	5.73701225510223e-06	2.0496513978143e-05
ENSBTAG00000021672	-4.33414	6.91257010269297	154.192372596236	2.10226773408834e-35	1.91092573862979e-33
ENSBTAG00000014432	-4.32762	4.25730789993322	182.618410346738	1.29938361341239e-41	1.85829181832817e-39
ENSBTAG00000011373	-4.32631	1.8599124371356	82.3028403609727	1.16754220134263e-19	2.46516882905533e-18
ENSBTAG00000007206	-4.3067	0.211889648810147	51.7783394980464	6.21334979472608e-13	6.36205399477065e-12
ENSBTAG00000011325	-4.29143	-1.04304130653374	69.5450024530119	7.46907652474712e-17	1.16443771518078e-15
ENSBTAG00000007773	-4.28838	-1.7252235364106	20.454204455849	6.10752383340734e-06	2.17350035292393e-05
ENSBTAG00000011324	-4.27873	-1.22525590308895	45.3810047522673	1.62199874302743e-11	1.38099787221783e-10
ENSBTAG00000030518	-4.26075	0.405821621211561	49.2706722573301	2.22971206716214e-12	2.11524952552024e-11
ENSBTAG00000002951	-4.18334	0.943917221433558	82.4516822337908	1.08285082242557e-19	2.29538694097563e-18
ENSBTAG00000045518	-4.18026	0.0216097065976505	16.1899326403209	5.72978156046553e-05	0.000170007294654366
ENSBTAG00000047122	-4.18026	0.0216097065976505	16.1900451644377	5.72944121420586e-05	0.000170007294654366
ENSBTAG00000005091	-4.16403	-0.628101302379415	74.156607798181	7.21591372921822e-18	1.26055196513998e-16
ENSBTAG00000017365	-4.14977	-1.40166628535135	25.9307127670553	3.53893609430969e-07	1.54554676496603e-06
ENSBTAG00000034875	-4.13751	2.40882409052275	115.873650564317	5.06563408747699e-27	2.24520624885447e-25
ENSBTAG00000003946	-4.09431	-0.200350029875157	53.8355289489091	2.17994798239217e-13	2.35944723099277e-12
ENSBTAG00000017741	-4.07898	2.07972226154344	60.5150800995029	7.30169592054125e-15	9.22473385674033e-14
ENSBTAG00000018077	-4.05093	0.752079478176175	91.6777219509972	1.02006844340127e-21	2.6621056262584e-20
ENSBTAG00000012771	-4.02916	9.05041978033589	326.483111254176	5.60767312142383e-73	5.012325158366e-70
ENSBTAG00000011059	-4.0205	0.407016862378167	69.1384207540996	9.17896923219455e-17	1.4186401150507e-15
ENSBTAG00000010738	-4.01016	-0.870779686834948	29.953296982922	4.42578709831595e-08	2.24317941826384e-07
ENSBTAG00000013167	-3.99235	-1.33529870487211	46.5593860764724	8.88834871350557e-12	7.82087188687947e-11
ENSBTAG00000010597	-3.99094	2.57096676031605	119.580129788806	7.81729385007028e-28	3.84625201081898e-26
ENSBTAG00000020699	-3.98899	3.53253808862789	66.0947919549839	4.29749814498423e-16	6.22904933825687e-15
ENSBTAG00000008721	-3.94967	4.60509864921444	122.735867700393	1.59305277189962e-28	8.37602158401731e-27
ENSBTAG00000003741	-3.93743	0.919826540279065	127.044632555957	1.81642226596498e-29	1.02541816972318e-27
ENSBTAG00000025005	-3.93543	0.251660087769825	40.3162401580566	2.16005925687804e-10	1.53030353958215e-09
ENSBTAG00000011102	-3.91483	0.533841011831222	72.1480342725974	1.99644482477282e-17	3.31484012237048e-16
ENSBTAG00000006754	-3.91378	-0.498554426391497	39.0521340475773	4.12637828504417e-10	2.80123629654328e-09
ENSBTAG00000022039	-3.9036	3.78239410362731	124.553083681405	6.37506895392872e-29	3.45348432322422e-27
ENSBTAG00000020261	-3.90187	-1.53530825480898	23.2414742303655	1.42882458950163e-06	5.69300614672902e-06
ENSBTAG00000010007	-3.86723	-0.148181904994921	58.872168787286	1.68255354390516e-14	2.03691527222649e-13
ENSBTAG00000032905	-3.8515	3.32946819669723	251.407232951187	1.28130813243102e-56	4.7390727684328e-54
ENSBTAG00000003334	-3.81742	3.21366229309706	53.1260698228325	3.12813166669676e-13	3.2991485011789e-12
ENSBTAG00000013118	-3.75157	7.1077219238332	216.053184625135	6.56628007490821e-49	1.49850893794607e-46
ENSBTAG00000007428	-3.7329	-1.53069903527629	43.0030009354846	5.46559636560255e-11	4.22972486417409e-10
ENSBTAG00000004613	-3.71093	2.8688181524951	125.269892488881	4.44226966776882e-29	2.44347612597376e-27
ENSBTAG00000011245	-3.67693	2.23808939767998	64.8801282862617	7.95957317729014e-16	1.11164559765122e-14
ENSBTAG00000001408	-3.63959	0.512364806723486	72.7024897224061	1.50743805622781e-17	2.52637196735929e-16
ENSBTAG00000031503	-3.62406	-0.997208582907716	20.1634303135519	7.10992770190394e-06	2.5069390049514e-05
ENSBTAG00000020453	-3.60964	2.08674091802179	59.3707815171817	1.3059376130638e-14	1.59902817782218e-13
ENSBTAG00000020605	-3.60321	2.89903198008532	39.7913617382192	2.82592190168199e-10	1.95806449079076e-09
ENSBTAG00000015321	-3.59285	0.901871615705415	66.3881830577785	3.70315524625271e-16	5.44110180428857e-15
ENSBTAG00000007353	-3.58491	-1.53027438601765	39.5627622428371	3.17683516839473e-10	2.18567889776792e-09
ENSBTAG00000005018	-3.53125	3.39670147861454	146.116671219898	1.22415140607226e-33	9.94715756176597e-32
ENSBTAG00000016357	-3.52926	1.75378432700539	16.5031675295722	4.85688669740758e-05	0.000146334176169645
ENSBTAG00000001066	-3.51691	7.57329233128665	134.081196465868	5.24461349816212e-31	3.28969148428578e-29
ENSBTAG00000014713	-3.50747	3.83481602139763	33.6357283109146	6.64607090473968e-09	3.82024418672229e-08
ENSBTAG00000008436	-3.50562	1.74307259171694	105.864880358429	7.89382908351263e-25	2.77603969671333e-23
ENSBTAG00000015341	-3.50295	0.0194231778662543	41.3579274424194	1.26756367762301e-10	9.31863468552736e-10
ENSBTAG00000009982	-3.49621	-1.04833170328235	29.5308216252796	5.50345254699642e-08	2.74175717691981e-07
ENSBTAG00000016359	-3.46651	-1.3333930754836	26.7807564623237	2.27895476828713e-07	1.02879077628989e-06
ENSBTAG00000006139	-3.46243	-2.02921946700418	14.2056173042478	0.000163880564572158	0.000446931842258066
ENSBTAG00000018975	-3.41721	4.81054100607698	114.572800517114	9.76159032421154e-27	4.18811271269972e-25
ENSBTAG00000030845	-3.41204	9.75567261096503	70.405872825193	4.82759926738557e-17	7.65988605650556e-16
ENSBTAG00000022890	-3.41023	-0.216806488922666	38.1579042952495	6.52449048145164e-10	4.32252531834777e-09
ENSBTAG00000019589	-3.40248	-0.685084969784824	49.5690616683202	1.91510068269097e-12	1.84062454503077e-11
ENSBTAG00000008611	-3.39548	1.31157453811313	88.8231554994601	4.31732673151703e-21	1.05484388433375e-19
ENSBTAG00000000333	-3.39433	0.913201175950782	35.6320082722179	2.38338991869342e-09	1.45977199693345e-08
ENSBTAG00000003598	-3.36714	-1.43641979997965	25.987744936389	3.43591526185036e-07	1.50422967749416e-06
ENSBTAG00000034246	-3.36587	0.175018152638694	64.4798940195739	9.75224448796947e-16	1.34797131930362e-14
ENSBTAG00000019251	-3.3631	3.5365407257627	65.1700774597735	6.8704877190001e-16	9.68368610696388e-15
ENSBTAG00000017666	-3.35208	-1.17083424081618	40.1623543843954	2.33708792870384e-10	1.64485597921767e-09
ENSBTAG00000034193	-3.34753	-0.747046101192251	51.9896205305738	5.57947897443719e-13	5.7488464437861e-12
ENSBTAG00000006645	-3.34535	3.10963238347255	94.339021185628	2.65857379611674e-22	7.31175962490978e-21
ENSBTAG00000026753	-3.32872	1.95631214153524	47.9138234449248	4.45370429224373e-12	4.05521496083245e-11
ENSBTAG00000015739	-3.30903	2.50012573073314	41.1653940414598	1.39877252361942e-10	1.02062816927496e-09
ENSBTAG00000011195	-3.30783	0.997735256215055	23.6720574404121	1.14229098803776e-06	4.6147695433872e-06
ENSBTAG00000005029	-3.29925	0.220327429777489	69.5173325695027	7.5745953665966e-17	1.17917430917439e-15
ENSBTAG00000014782	-3.29875	3.5476360485979	47.1090565747023	6.71447131476046e-12	6.00662379667396e-11
ENSBTAG00000017775	-3.27527	1.4605967854231	112.911514423925	2.25622522418348e-26	9.23674494450076e-25
ENSBTAG00000019076	-3.251	-1.83564560395826	15.996936281253	6.34450716729525e-05	0.000186851136398706
ENSBTAG00000019315	-3.24127	0.257540410707169	23.9177661306681	1.00539630700842e-06	4.09255437911662e-06
ENSBTAG00000012815	-3.24106	6.76424901170261	109.17092362653	1.48878103323518e-25	5.70309477231447e-24
ENSBTAG00000007268	-3.23394	9.86302060759746	106.304557265246	6.32308943363521e-25	2.25320456030469e-23
ENSBTAG00000006862	-3.23187	4.97563251478287	62.3641848151955	2.85467858340296e-15	3.76158261493613e-14
ENSBTAG00000003936	-3.20845	4.49275958056572	141.814857812614	1.06749017589293e-32	7.84239700453943e-31
ENSBTAG00000018403	-3.20817	2.51817671776994	128.785727433298	7.55495126017177e-30	4.40404387046752e-28
ENSBTAG00000013201	-3.20817	-1.54963963033956	19.8484270681343	8.38316848765673e-06	2.91846365461234e-05
ENSBTAG00000022238	-3.18078	0.0517633359024054	66.104036953403	4.27738810091614e-16	6.20829022603877e-15
ENSBTAG00000010835	-3.1643	1.87662171209331	187.154130944993	1.32906700875406e-42	2.0365103908423e-40
ENSBTAG00000001097	-3.15838	-0.088476360799512	67.2833804904602	2.3515537763599e-16	3.51781949863825e-15
ENSBTAG00000006592	-3.15263	-1.2864126844707	25.5538153061781	4.30214519865278e-07	1.85246123648132e-06
ENSBTAG00000015994	-3.14519	1.20545901691969	66.6018040907264	3.32281876639437e-16	4.91593849494428e-15
ENSBTAG00000007193	-3.1446	1.28661494487165	60.9129234881664	5.96559345975084e-15	7.61749469634375e-14
ENSBTAG00000023073	-3.14373	1.25018498736579	84.9038566086915	3.1323158039608e-20	7.10300619731154e-19
ENSBTAG00000026779	-3.14244	6.64815504398876	34.7037125628698	3.83898769331839e-09	2.29398228404084e-08
ENSBTAG00000039050	-3.13769	-0.281208736192586	63.4606647834593	1.63601270588663e-15	2.22124965611898e-14
ENSBTAG00000006572	-3.13196	1.64726527510808	76.7031401668568	1.98687194440989e-18	3.68068885591372e-17
ENSBTAG00000000277	-3.12566	1.45631222960267	133.458148228375	7.17800075606314e-31	4.45036046875915e-29
ENSBTAG00000025822	-3.11355	0.360166918765993	98.7828657063027	2.81761811973371e-23	8.7599338992069e-22
ENSBTAG00000009576	-3.10372	-1.11389469565496	29.8484713670154	4.67165066281328e-08	2.35581217721369e-07
ENSBTAG00000039731	-3.09971	1.5755890243631	34.3877749389197	4.51550658935509e-09	2.6743966691012e-08
ENSBTAG00000020783	-3.0994	5.51637673752326	246.41148643001	1.57322278256887e-55	5.44335082768828e-53
ENSBTAG00000023648	-3.08729	-1.08830467971998	21.1973738068016	4.14331856262852e-06	1.52352536519553e-05
ENSBTAG00000022564	-3.08406	-1.75090322897743	13.7755103293603	0.000206004171903728	0.000549515231991888
ENSBTAG00000011397	-3.06678	0.748171190563026	84.1386473836223	4.61265076565232e-20	1.01801012576927e-18
ENSBTAG00000027684	-3.06081	0.446142906815401	30.247047701347	3.80369791203092e-08	1.94278399068779e-07
ENSBTAG00000002006	-3.05494	14.2241967874503	124.537246726853	6.4261524315144e-29	3.46366386836299e-27
ENSBTAG00000006957	-3.05262	0.928188330004426	92.2133090421063	7.78196519158589e-22	2.07119996637594e-20
ENSBTAG00000007153	-3.03213	3.13830702093114	19.9759872715177	7.84208251118916e-06	2.74345000048973e-05
ENSBTAG00000008479	-3.0303	2.42618833466807	10.4823748757453	0.00120518737351961	0.00274455196780708
ENSBTAG00000010635	-3.03004	-1.39433109218839	23.2576003128359	1.41689404684883e-06	5.65387111104929e-06
ENSBTAG00000021318	-3.02256	6.63875545196173	104.313654444405	1.72694788328714e-24	5.91796900835077e-23
ENSBTAG00000000313	-3.01749	-1.12970892799275	25.3412587456373	4.80324084302012e-07	2.05420898254521e-06
ENSBTAG00000009055	-3.01539	2.88619180414222	31.4687051066627	2.02680672791542e-08	1.07408739938838e-07
ENSBTAG00000015829	-3.01345	0.0718405183734168	22.8041421139045	1.79378681374859e-06	7.0425173368475e-06
ENSBTAG00000006039	-3.00316	5.92618113546438	142.547677487851	7.38125360669887e-33	5.57544550601775e-31
ENSBTAG00000013856	-3.00247	0.912701672652553	59.4485659471178	1.25532535259078e-14	1.54233902999871e-13
ENSBTAG00000010663	-2.99723	-0.413030236055054	38.661329675571	5.04097965697198e-10	3.38569491550917e-09
ENSBTAG00000006354	-2.98587	1.00920733290085	17.4178297140835	2.99998671184265e-05	9.43908990062313e-05
ENSBTAG00000007235	-2.98537	-1.12303747254947	16.1655846188474	5.80390609157408e-05	0.000172159006466326
ENSBTAG00000005976	-2.98072	6.55026315150956	162.035728416703	4.06334047766895e-37	4.35833899634771e-35
ENSBTAG00000018598	-2.97751	-0.788911846778277	43.5118182962432	4.2140667247447e-11	3.34320116047423e-10
ENSBTAG00000000752	-2.97438	-0.0517478553593688	55.6953362619699	8.46187886432931e-14	9.56397394086366e-13
ENSBTAG00000040607	-2.9714	1.26344713866988	55.4250163614977	9.70929117444909e-14	1.09049065065069e-12
ENSBTAG00000044079	-2.9646	2.08822631412958	91.359451764114	1.19806478270268e-21	3.11148737512565e-20
ENSBTAG00000015426	-2.9567	0.219157314479063	19.158584575159	1.20295259517994e-05	4.0638959168189e-05
ENSBTAG00000003061	-2.95666	1.11116794714933	30.892566540318	2.72714348470692e-08	1.42411592098181e-07
ENSBTAG00000002490	-2.95628	4.80117380119642	75.8149583321318	3.1153215250288e-18	5.66354892838287e-17
ENSBTAG00000009047	-2.95325	2.02355719770079	63.1157380272119	1.94910526924498e-15	2.61326288974021e-14
ENSBTAG00000008792	-2.95319	2.42525401020601	59.536862802659	1.20024697831339e-14	1.47805385641669e-13
ENSBTAG00000043359	-2.94108	-1.31286440072396	16.1057329643364	5.99024240060542e-05	0.000177329358270783
ENSBTAG00000045565	-2.93248	0.000825463103750963	58.1216764108058	2.46396306331911e-14	2.94631748240365e-13
ENSBTAG00000044010	-2.92689	6.79073232218918	72.2455252973049	1.90021084112336e-17	3.1697762802316e-16
ENSBTAG00000017151	-2.92654	-1.79912836193873	14.0199676580608	0.000180879593585144	0.000489186717295577
ENSBTAG00000008431	-2.92223	1.78780120894678	90.9108582794579	1.5029264876028e-21	3.85655251340374e-20
ENSBTAG00000003176	-2.92034	6.34374318805812	155.646982070191	1.01113744886902e-35	9.68344667550814e-34
ENSBTAG00000047225	-2.91884	0.0525798120484669	38.0050529241693	7.05616512679483e-10	4.64892058660942e-09
ENSBTAG00000022000	-2.91235	-0.309148155868519	15.5112489249088	8.20157304042671e-05	0.000236605896803703
ENSBTAG00000006790	-2.88683	2.49709042290371	62.9947243418712	2.07260980600022e-15	2.775382369433e-14
ENSBTAG00000011193	-2.87768	1.94182383738787	21.116369224591	4.32220208603802e-06	1.58603967070967e-05
ENSBTAG00000013778	-2.87073	-1.6749123060742	13.1208420416257	0.000292028752255407	0.000755135100456003
ENSBTAG00000038415	-2.86959	-1.27176124004088	12.3059340532421	0.000451520484196337	0.001127067422269
ENSBTAG00000017393	-2.85922	3.38945778732657	85.2667127505804	2.60715510598328e-20	5.96254705048543e-19
ENSBTAG00000003489	-2.85292	0.724822524008091	24.2123846634832	8.62757055759552e-07	3.54556788508696e-06
ENSBTAG00000011034	-2.84333	-0.60222364686102	7.89953398637947	0.0049447535001092	0.00986009035920642
ENSBTAG00000012200	-2.84104	1.34477241625669	66.0673337964785	4.35778546764266e-16	6.2994079415007e-15
ENSBTAG00000008682	-2.84101	0.97651218316684	22.5247172915679	2.07456971505903e-06	8.04186294315978e-06
ENSBTAG00000023610	-2.83854	3.30497166461482	118.756380183913	1.18415411868251e-27	5.62001640574716e-26
ENSBTAG00000021809	-2.83185	2.05328185855841	41.711549614004	1.05782249732599e-10	7.87930840716566e-10
ENSBTAG00000039664	-2.83134	-0.55515325282021	7.34160916620313	0.0067376499568874	0.0130778200212766
ENSBTAG00000014069	-2.83102	4.76027907074386	55.985310755667	7.30145131652427e-14	8.31373320817827e-13
ENSBTAG00000002243	-2.82798	1.2823254469461	95.2053283579977	1.7162770662655e-22	4.88296758959251e-21
ENSBTAG00000009107	-2.82171	-0.918926281194833	33.3369592404046	7.74957413114621e-09	4.40497785536164e-08
ENSBTAG00000019617	-2.82144	2.20671925902276	44.972305028279	1.99840890570819e-11	1.67591352014277e-10
ENSBTAG00000021830	-2.81838	1.51139991441322	60.6646540838571	6.76744129763455e-15	8.59024560454771e-14
ENSBTAG00000014103	-2.80883	-0.989483257327404	23.8339304616027	1.05014903752967e-06	4.26662824869063e-06
ENSBTAG00000015209	-2.80125	-0.234871592088559	44.0655806258495	3.17556071754727e-11	2.58822676720456e-10
ENSBTAG00000001806	-2.79979	-1.2979712054993	27.2914992036189	1.74978994739766e-07	8.03091440983625e-07
ENSBTAG00000038131	-2.79226	-1.41793196178193	32.8004572349133	1.0212082034948e-08	5.69011906009623e-08
ENSBTAG00000010254	-2.79115	0.382531139395763	38.1133613626794	6.67514612588628e-10	4.41415643318472e-09
ENSBTAG00000016498	-2.785	0.736318057577958	59.804347180864	1.04771680134154e-14	1.29617190440477e-13
ENSBTAG00000032396	-2.77819	-1.43826251758267	23.6726672257286	1.14192909680428e-06	4.6147695433872e-06
ENSBTAG00000042484	-2.77649	-1.35063645262837	12.8462874109431	0.000338149479942121	0.000863980781767314
ENSBTAG00000002473	-2.77356	-0.567343664078235	17.1101677431982	3.52729612454453e-05	0.000109377791939476
ENSBTAG00000008884	-2.77092	0.657814138948816	79.9056392905082	3.9272408739652e-19	7.91796722070502e-18
ENSBTAG00000001110	-2.76755	1.14627526132322	73.8770781172613	8.31361116956843e-18	1.44057824563475e-16
ENSBTAG00000014642	-2.767	0.463170293658751	46.0657547134695	1.14349876393788e-11	9.93130991254871e-11
ENSBTAG00000020965	-2.76602	-0.73289110629907	50.4128198020573	1.24577760336567e-12	1.23267625218636e-11
ENSBTAG00000006792	-2.76596	4.92600032614257	122.441921907442	1.84744786962776e-28	9.61928439302298e-27
ENSBTAG00000000843	-2.76552	2.2525262651947	106.760785559341	5.02281707126361e-25	1.81396417193177e-23
ENSBTAG00000005496	-2.76277	5.17400535043782	197.270663384239	8.23103114018987e-45	1.47143400016128e-42
ENSBTAG00000030521	-2.75948	0.52118661429816	33.0040626681023	9.19664959182115e-09	5.17540732014028e-08
ENSBTAG00000021611	-2.75438	0.0905440147672099	50.1641589496254	1.41407120696991e-12	1.38641021626684e-11
ENSBTAG00000047088	-2.74849	-0.831442653049002	18.2717364097773	1.91527874707957e-05	6.24985696415439e-05
ENSBTAG00000013974	-2.73855	5.91269096923567	28.009429025837	1.20725772383273e-07	5.68938767391471e-07
ENSBTAG00000007409	-2.73806	3.32022644273304	66.3799134508418	3.71872387864162e-16	5.45650236967306e-15
ENSBTAG00000000962	-2.7369	2.82353916488668	76.0262676134088	2.79916324989892e-18	5.0974236024475e-17
ENSBTAG00000021901	-2.73381	-0.599574962644353	38.2129655029095	6.34295582123843e-10	4.20745480139786e-09
ENSBTAG00000031178	-2.73125	3.90583586881985	35.382885308255	2.70856496260049e-09	1.64600950645059e-08
ENSBTAG00000021680	-2.73008	1.28850455171752	134.338703119114	4.60665810440707e-31	2.94113183499227e-29
ENSBTAG00000000875	-2.72038	-0.898149641458848	37.5538547827117	8.8923508081894e-10	5.78407245413217e-09
ENSBTAG00000000279	-2.71957	-1.29706194284797	22.725490779408	1.86872403900657e-06	7.29932048156756e-06
ENSBTAG00000008541	-2.71824	2.03403593352798	25.4039829832004	4.64957142033926e-07	1.99325751616942e-06
ENSBTAG00000003358	-2.7154	4.79342071245322	181.665632949024	2.09775186600524e-41	2.92214110581458e-39
ENSBTAG00000033669	-2.71029	1.95952913379052	50.4491764348624	1.2229111367277e-12	1.21340840449041e-11
ENSBTAG00000000684	-2.7093	-0.284767762050089	31.0083701612046	2.5691807806121e-08	1.34555825453347e-07
ENSBTAG00000021263	-2.70702	3.57181763740477	27.7063820023199	1.41196125940489e-07	6.57607315170512e-07
ENSBTAG00000002764	-2.70457	3.161361885508	50.365352869117	1.27627709020826e-12	1.26052928817438e-11
ENSBTAG00000000032	-2.69521	0.183318585090165	38.2723519373032	6.15282511056234e-10	4.09653644543089e-09
ENSBTAG00000014907	-2.68783	0.797208384184311	61.7738233147094	3.85262044490266e-15	5.02104579489987e-14
ENSBTAG00000000067	-2.67908	1.36813730136968	46.4760891661719	9.27432806075284e-12	8.14712881078092e-11
ENSBTAG00000014603	-2.67882	0.622390833983054	68.6378031715224	1.18314201419489e-16	1.81810619545192e-15
ENSBTAG00000020872	-2.67568	6.93865246634932	204.911898652947	1.77014514228314e-46	3.39046014216588e-44
ENSBTAG00000025391	-2.67017	0.670694782148137	36.9138075608423	1.23468459602997e-09	7.88756818166615e-09
ENSBTAG00000019090	-2.6642	-1.3874742960433	17.0391110250724	3.66177509014359e-05	0.000113090122709128
ENSBTAG00000035587	-2.66261	6.35182601324783	82.9070569845344	8.60035925410764e-20	1.83759867250117e-18
ENSBTAG00000008028	-2.62516	-0.89303048172182	10.148126221895	0.00144447991224548	0.00323252483595765
ENSBTAG00000005917	-2.62473	-0.824513713731207	33.5836705662659	6.82634055650293e-09	3.91756708448638e-08
ENSBTAG00000032899	-2.61072	-1.55475655049795	8.85563993400917	0.00292184663332879	0.00613181901566907
ENSBTAG00000017242	-2.6099	0.586865517607909	35.019849986677	3.26361313833199e-09	1.96329301860622e-08
ENSBTAG00000008814	-2.6081	0.00371827607996989	25.8498385013688	3.69035571876178e-07	1.60709522693621e-06
ENSBTAG00000014151	-2.60308	4.67781802588318	116.040172821366	4.65765470011556e-27	2.09907581148905e-25
ENSBTAG00000006156	-2.60279	1.80012894765992	37.6359143074525	8.52601330571154e-10	5.56942866729975e-09
ENSBTAG00000040356	-2.60047	0.390087800840905	70.4597142284997	4.69762251325203e-17	7.47577137643046e-16
ENSBTAG00000020654	-2.59588	1.76928724109893	33.4213381931315	7.42053257938677e-09	4.23590380236841e-08
ENSBTAG00000015815	-2.59525	4.22405951876548	27.2971471050662	1.74468637593875e-07	8.02121991783928e-07
ENSBTAG00000016959	-2.5951	4.21008122238417	126.297450737542	2.64683389134969e-29	1.47864272492795e-27
ENSBTAG00000038042	-2.59464	2.7063988907105	40.1803015412908	2.31571538908236e-10	1.63302848542389e-09
ENSBTAG00000003749	-2.58802	0.712765743098128	24.814178585543	6.313138446494e-07	2.6523589101878e-06
ENSBTAG00000038490	-2.58772	4.80480320504757	64.9009238257328	7.87601423563314e-16	1.10284763304701e-14
ENSBTAG00000018604	-2.57836	-1.31919040430725	33.3689641407832	7.623082830338e-09	4.33767567311435e-08
ENSBTAG00000004885	-2.56776	1.32114280130845	53.1496508431982	3.09080377346555e-13	3.26298831438893e-12
ENSBTAG00000019347	-2.56447	2.42464917555098	92.1200788945798	8.15734967511047e-22	2.16038845963543e-20
ENSBTAG00000020990	-2.56122	-0.0670864430275854	23.044500578632	1.58294646549054e-06	6.26519697005591e-06
ENSBTAG00000021588	-2.56109	-0.665599857843572	14.453125359207	0.00014369122064742	0.000395491925241012
ENSBTAG00000004322	-2.55734	4.68549933179428	40.6295671480841	1.84001272996049e-10	1.32031117132105e-09
ENSBTAG00000012451	-2.55328	3.33707698257683	51.6190084133121	6.7385995723578e-13	6.8705531381283e-12
ENSBTAG00000023283	-2.54067	4.77724743169805	37.3938652249435	9.65252723612513e-10	6.24445157627733e-09
ENSBTAG00000010932	-2.53574	-0.766903361323955	32.1782879986046	1.40653808487839e-08	7.61561206380901e-08
ENSBTAG00000021144	-2.53536	4.8905170064731	51.2268973446832	8.22834300303591e-13	8.31047147368768e-12
ENSBTAG00000001462	-2.53507	1.7891423876243	20.9453777919686	4.72566659757441e-06	1.72113751869552e-05
ENSBTAG00000047605	-2.53235	2.94761058240334	36.0499175204469	1.92326928019355e-09	1.19242695372e-08
ENSBTAG00000009289	-2.52946	4.00766282514542	40.6716932202794	1.80076959965432e-10	1.29457471353165e-09
ENSBTAG00000011766	-2.5267	-0.65988287344573	30.1039362471732	4.09499191890035e-08	2.08461714865331e-07
ENSBTAG00000018035	-2.51827	4.41415646950522	60.4528798994174	7.53610281634356e-15	9.50967515389424e-14
ENSBTAG00000007661	-2.50838	6.357921560641	106.368197202718	6.12325670336499e-25	2.18926838000976e-23
ENSBTAG00000012676	-2.50784	0.93601589358943	61.3326681417246	4.82015801508754e-15	6.22903793612397e-14
ENSBTAG00000015160	-2.50587	-0.0495395114272387	18.9644341324781	1.33177916786879e-05	4.4691728929115e-05
ENSBTAG00000030255	-2.49821	-0.661324186213828	40.4690617432045	1.99754107616039e-10	1.425523990878e-09
ENSBTAG00000007624	-2.49749	4.5914979459556	82.5317107936201	1.03988379206007e-19	2.20867199081907e-18
ENSBTAG00000017468	-2.4963	1.78965502536649	73.1564860110367	1.19767343103184e-17	2.0294226257895e-16
ENSBTAG00000000539	-2.4926	0.32118462773715	43.9211158475689	3.41880530836611e-11	2.76755515000263e-10
ENSBTAG00000009477	-2.48507	0.740833642931299	44.8050549308514	2.17660057007159e-11	1.81259454305807e-10
ENSBTAG00000018192	-2.48491	2.33874159429058	137.137110541129	1.12539834261439e-31	7.49752957942979e-30
ENSBTAG00000016504	-2.47837	-0.142651252138445	27.9098122471984	1.27103569771756e-07	5.97135825737605e-07
ENSBTAG00000004394	-2.47732	7.20168103369702	111.738116097289	4.07767304516605e-26	1.62591528187551e-24
ENSBTAG00000006036	-2.47442	-1.13805595822816	25.0337616957074	5.63351915747633e-07	2.38780851315905e-06
ENSBTAG00000004879	-2.46864	2.42242684774856	76.2896642043926	2.4496267049672e-18	4.49909178723941e-17
ENSBTAG00000032558	-2.46596	1.66999520639424	73.7049224752186	9.07123788880439e-18	1.56176721661823e-16
ENSBTAG00000007578	-2.46135	5.13940892129344	117.842690351884	1.87699614909674e-27	8.71543753039467e-26
ENSBTAG00000039340	-2.46115	-0.0607137729356849	20.3424035969808	6.47496281811965e-06	2.29360803127977e-05
ENSBTAG00000007281	-2.45383	-0.498636255735649	29.9525979932507	4.42738283466768e-08	2.24317941826384e-07
ENSBTAG00000002096	-2.44516	7.0624088900569	22.1647015062439	2.50232405754734e-06	9.56178405459664e-06
ENSBTAG00000009336	-2.44453	6.4673047638196	49.3867436076082	2.10161007073399e-12	2.00729025990141e-11
ENSBTAG00000013953	-2.43207	1.60424115378334	73.1822620827799	1.18213391385276e-17	2.00626081645327e-16
ENSBTAG00000007644	-2.41959	3.43666484118411	100.19497419673	1.38109505395888e-23	4.40881712760803e-22
ENSBTAG00000019321	-2.41732	-0.34157499505641	43.0600145184928	5.3086188849574e-11	4.11715445842755e-10
ENSBTAG00000021205	-2.4171	-0.139595961167332	46.8217724489278	7.77448662755671e-12	6.90307479860706e-11
ENSBTAG00000019663	-2.41547	4.16007011188168	102.497090234361	4.32001740113266e-24	1.43013909396756e-22
ENSBTAG00000020352	-2.41295	-0.237301524960087	32.2770192024096	1.33685119951369e-08	7.26396452177499e-08
ENSBTAG00000015097	-2.4089	-0.497387993843615	27.708809322276	1.41019070307298e-07	6.57068005263283e-07
ENSBTAG00000046842	-2.40791	-0.0151076674233456	15.403968356711	8.68058059621566e-05	0.000248885077452577
ENSBTAG00000013007	-2.4046	4.0994163859963	75.2942729996594	4.05534229221759e-18	7.28603038966932e-17
ENSBTAG00000044159	-2.40082	-0.781343610692013	27.9728438928313	1.23029933778494e-07	5.79288441487326e-07
ENSBTAG00000013686	-2.39988	-0.885217868253937	16.4151481740987	5.08770137568694e-05	0.00015268798252831
ENSBTAG00000005761	-2.39603	1.98082537721103	56.1761191793512	6.62614776146351e-14	7.60128993470135e-13
ENSBTAG00000037649	-2.39259	-1.24099898451636	15.917091460842	6.61784028931219e-05	0.000194207811062004
ENSBTAG00000019916	-2.38867	-1.52982853801223	14.463433363852	0.000142906976209444	0.000393882253330324
ENSBTAG00000011658	-2.38856	2.53517950427918	73.3650745904735	1.07756021208664e-17	1.83168159030765e-16
ENSBTAG00000010559	-2.38783	-0.24002683078732	28.6872895655328	8.50601902962186e-08	4.1301747447589e-07
ENSBTAG00000002350	-2.38725	1.99940148754631	55.1437793740247	1.1202765612063e-13	1.24519030005169e-12
ENSBTAG00000010033	-2.38113	0.312026030772751	30.6991005194518	3.01304689956271e-08	1.56200778369791e-07
ENSBTAG00000000130	-2.37305	0.999050116310435	74.4352818931604	6.26590940034422e-18	1.10904528429195e-16
ENSBTAG00000020632	-2.36025	2.69055278892391	27.2942278151467	1.74732244688648e-07	8.02393962215709e-07
ENSBTAG00000008744	-2.35655	1.55561324995046	43.1898295910975	4.96782399303967e-11	3.87526401086135e-10
ENSBTAG00000018539	-2.35106	-0.175896231309349	16.5229035348262	4.8065948314258e-05	0.000144981822727427
ENSBTAG00000002083	-2.35003	1.84123647555308	22.1265261367671	2.55258119423842e-06	9.73648146849265e-06
ENSBTAG00000007484	-2.34818	-0.210681281856765	34.2271768908236	4.90393051889608e-09	2.88058919746327e-08
ENSBTAG00000018157	-2.34801	0.249153323796654	68.1391795805315	1.52353211150817e-16	2.314646661195e-15
ENSBTAG00000021512	-2.34661	3.38127117521397	101.440251557154	7.36518373410869e-24	2.39390790097121e-22
ENSBTAG00000010191	-2.34598	3.89865588927311	35.3165010795472	2.80247562879642e-09	1.69826856465935e-08
ENSBTAG00000001906	-2.33747	0.982818691037547	65.901996275264	4.73911418791638e-16	6.81390600262615e-15
ENSBTAG00000008499	-2.3372	-0.0571568553459736	26.1699531236263	3.12649696539979e-07	1.37719944356789e-06
ENSBTAG00000013334	-2.33652	-1.75073110735325	10.5555736148979	0.0011583825900791	0.00264695604200862
ENSBTAG00000019967	-2.33455	5.01201842544214	112.509409510578	2.76350301350698e-26	1.12704689440593e-24
ENSBTAG00000003947	-2.33431	-0.387542528955306	40.4302969875028	2.03756875905399e-10	1.45119272972198e-09
ENSBTAG00000009218	-2.3304	0.771908934313018	70.4903239381438	4.6252955740968e-17	7.38257742972653e-16
ENSBTAG00000023144	-2.33003	7.661991309598	40.8762051011153	1.62183864698546e-10	1.17380845665088e-09
ENSBTAG00000018269	-2.32933	2.37667547583605	104.417589885274	1.63869316957696e-24	5.63353299259054e-23
ENSBTAG00000013755	-2.32872	-0.292814920801168	23.2551880347116	1.41867234449582e-06	5.65675820336882e-06
ENSBTAG00000047739	-2.32693	7.1521146556815	91.6930858966773	1.01217927327562e-21	2.64795972808641e-20
ENSBTAG00000048155	-2.32102	5.36656022746864	13.7616159829637	0.000207533495502382	0.000553044539815788
ENSBTAG00000043985	-2.32052	-1.54681464613396	17.126001241185	3.49801310788445e-05	0.000108689712036989
ENSBTAG00000014744	-2.31954	2.81130955726867	85.7526067571043	2.03915258948603e-20	4.69355164695862e-19
ENSBTAG00000018101	-2.31758	5.86637438802877	90.1988845907696	2.15383473286724e-21	5.42301205275446e-20
ENSBTAG00000006771	-2.31704	2.17653354304955	84.8941572848419	3.14771916654713e-20	7.12287674691657e-19
ENSBTAG00000015651	-2.31473	-0.497112467814612	15.9378196204073	6.5457632742185e-05	0.000192355772271966
ENSBTAG00000003556	-2.31337	0.207269880948946	37.235639708605	1.04683021106043e-09	6.73159523011641e-09
ENSBTAG00000004085	-2.31158	0.872964478854513	73.5085839136352	1.00199461445201e-17	1.71683613971443e-16
ENSBTAG00000048167	-2.31068	0.643669662388417	17.114815956612	3.51867410074204e-05	0.00010915607190004
ENSBTAG00000015182	-2.3037	-1.65458474467364	11.3088170754634	0.000771399016399328	0.00183459553212842
ENSBTAG00000011892	-2.30236	1.10849109394162	48.5034487375912	3.29708548548683e-12	3.06717596854569e-11
ENSBTAG00000025149	-2.30228	0.795245439315108	57.2980120459041	3.74533605831184e-14	4.35238077588871e-13
ENSBTAG00000017852	-2.29981	4.25168999104875	154.07662481529	2.22834973270315e-35	2.00851085991378e-33
ENSBTAG00000011103	-2.29205	6.33178177396317	44.8269262087119	2.15242363273239e-11	1.79385360409383e-10
ENSBTAG00000008743	-2.288	4.67588152203448	143.272781156372	5.12376259944626e-33	3.92553411726147e-31
ENSBTAG00000040116	-2.28745	1.81058256212837	47.7916453152213	4.74007682165969e-12	4.28324043716275e-11
ENSBTAG00000039954	-2.28457	1.5293977182099	36.1473264102724	1.82949308954416e-09	1.14127243474112e-08
ENSBTAG00000003733	-2.27562	0.34570554701812	30.8452110083521	2.7945089157682e-08	1.455043817016e-07
ENSBTAG00000006859	-2.27503	2.55988425398652	77.9234649966676	1.07111370673507e-18	2.05156528900721e-17
ENSBTAG00000005144	-2.27342	1.76022861626712	59.5181363729251	1.21172258290698e-14	1.49047436058031e-13
ENSBTAG00000009287	-2.27277	2.75608518787475	103.47426382767	2.63798754830213e-24	8.8699230229118e-23
ENSBTAG00000015326	-2.2702	6.52839414182936	60.1563751284051	8.76126648823036e-15	1.09526042369183e-13
ENSBTAG00000021919	-2.2663	4.15495860055312	94.7166770663174	2.19680595541682e-22	6.15220383232398e-21
ENSBTAG00000014306	-2.26245	5.84962323688262	175.731640288241	4.1441656085389e-40	5.22944944908097e-38
ENSBTAG00000031461	-2.26071	-0.600819094407641	24.6950613016136	6.71560424723173e-07	2.80934364882245e-06
ENSBTAG00000020456	-2.2386	4.56870102820875	224.662774787195	8.69682579461711e-51	2.22100365412055e-48
ENSBTAG00000006157	-2.23785	-0.578119945164089	33.1979572384439	8.32379297096943e-09	4.70147463963234e-08
ENSBTAG00000023635	-2.23487	3.75586937917448	26.7449199763329	2.32161264040577e-07	1.04601977198426e-06
ENSBTAG00000014730	-2.23295	5.66549078569021	159.703799934146	1.31330272826205e-36	1.34157000603226e-34
ENSBTAG00000025540	-2.2323	-1.23138253153718	13.8205573890482	0.00020112356776517	0.000537565758247998
ENSBTAG00000001717	-2.23211	-1.06882004250531	29.5860474100141	5.34885823071727e-08	2.67467847937871e-07
ENSBTAG00000047502	-2.23133	4.94739170921791	138.115308346371	6.87656513132193e-32	4.63887028921755e-30
ENSBTAG00000012052	-2.22473	2.57372100678908	28.7434919123291	8.26271202274598e-08	4.02296183186443e-07
ENSBTAG00000012668	-2.22313	2.20177439450222	16.4632359262055	4.96026571928787e-05	0.000149239299032487
ENSBTAG00000023452	-2.22235	0.865686393899541	52.6833549870445	3.9189839633733e-13	4.08503615074266e-12
ENSBTAG00000012504	-2.21849	1.68030229474051	32.8585892602992	9.91121881514838e-09	5.54842030330279e-08
ENSBTAG00000011278	-2.21544	1.82595150393795	73.1448887996481	1.20473148727879e-17	2.03816244992939e-16
ENSBTAG00000014217	-2.21386	3.89954631744165	51.2974324397314	7.9379390060989e-13	8.05509307279251e-12
ENSBTAG00000003616	-2.21291	1.57546898276449	111.703855374463	4.14875196269914e-26	1.64813013155226e-24
ENSBTAG00000010587	-2.21147	4.38091448980635	74.6147398251106	5.72144325364579e-18	1.01771476515099e-16
ENSBTAG00000016269	-2.20996	4.76536865332439	154.765704551972	1.57541423372972e-35	1.46938200617261e-33
ENSBTAG00000031209	-2.19691	-0.0926214848585773	27.7606340615046	1.37291463767202e-07	6.40812985364231e-07
ENSBTAG00000014089	-2.19494	1.03698271006555	59.9241139733205	9.85861433790881e-15	1.22530124436164e-13
ENSBTAG00000010994	-2.19285	3.74141700242567	47.4399668888496	5.67144821129861e-12	5.11622821819923e-11
ENSBTAG00000005715	-2.19283	2.23986898501284	33.4836428743454	7.18658467918717e-09	4.11266927388584e-08
ENSBTAG00000008397	-2.19099	-0.377062648950733	33.6902242390176	6.46246370287428e-09	3.72468488323641e-08
ENSBTAG00000037735	-2.18822	6.68953032193889	118.66413519016	1.24052346114504e-27	5.86160997543685e-26
[truncated: 486 more rows]

## Sheet: DE genes ST103_ST12_up
genes	logFC	logCPM	LR	PValue	FDR
[truncated: 42 more rows]

## Sheet: DE genes ST103_ST12_down
genes	logFC	logCPM	LR	PValue	FDR
[truncated: 18 more rows]
