# Supplementary material for: Transcription Profiling of Monocyte-Derived Macrophages Infected In Vitro With Two Strains of Streptococcus agalactiae Reveals Candidate Pathways Affecting Subclinical Mastitis in Cattle
Source: Front Genet. 2019 Jul 26;10:689. doi: 10.3389/fgene.2019.00689 (PMC6681682; doi:10.3389/fgene.2019.00689)
Supplement: Supplementary file 7 [file Table_7.xlsx]

## Sheet: Supplementary Table 7
Supplementary Table 7.
Detailed information on canonical pathways, biological networks and upstream regulators overrepresented among significantly differentially expressed (DE) genes between bovine monocyte-derived macrophages (bMDM) infected with Streptococcus agalactiae strains ST103 or ST12, and the respective uninfected controls, as revealed by Ingenuity Pathway Analysis (IPA). The number in parentheses represents …

## Sheet: ST103_contr_up (DE809)
© 2000-2018 QIAGEN. All rights reserved.
Ingenuity Canonical Pathways	-log(p-value)	Ratio	z-score	Molecules
Differential Regulation of Cytokine Production in Macrophages and T Helper Cells by IL-17A and IL-17F	10.5	0.556	NaN	IL9,CSF2,CCL5,TNF,CCL2,IL17A,IL10,IL12B,CSF3,CCL4
Granulocyte Adhesion and Diapedesis	9.26	0.14	NaN	GNAI1,CCL8,CLDN4,CCL20,HRH1,CCL3L3,SDC1,IL1RN,TNF,ITGB3,CCL4,SDC3,IL33,CCL5,CXCL10,EZR,CXCL2,HSPB1,CCL22,CCL2,CSF3,SDC4,ICAM1,IL36G,PECAM1
Differential Regulation of Cytokine Production in Intestinal Epithelial Cells by IL-17A and IL-17F	9.11	0.435	NaN	IL9,CSF2,CCL5,TNF,CCL2,IL17A,IL10,IL12B,CSF3,CCL4
Th1 and Th2 Activation Pathway	8.96	0.135	NaN	IRF1,SOCS3,IL12RB2,GAB1,IL27,CD274,DLL4,IL9,STAT1,STAT5A,CRLF2,IL12B,NFIL3,IL27RA,IL33,S1PR1,STAT4,JAG1,IL2RA,LTA,TNFSF4,DLL1,IL10,ICAM1,TBX21
Role of Hypercytokinemia/hyperchemokinemia in the Pathogenesis of Influenza	7.15	0.256	NaN	IL9,IL1RN,CCL5,CXCL10,TNF,CCL2,IL17A,IL12B,CCL4,IL36G,IL33
Role of Cytokines in Mediating Communication between Immune Cells	6.07	0.204	NaN	IL23A,CSF2,IL1RN,TNF,IL17A,IL10,IL12B,CSF3,IL36G,IL27,IL33
Th1 Pathway	5.86	0.126	2.324	IRF1,STAT4,SOCS3,IL12RB2,LTA,GAB1,IL27,CD274,DLL4,DLL1,STAT1,IL10,IL12B,ICAM1,NFIL3,TBX21,IL27RA
Agranulocyte Adhesion and Diapedesis	5.5	0.105	NaN	GNAI1,CCL8,CCL5,CXCL10,EZR,CLDN4,CCL20,HRH1,CCL3L3,CXCL2,CCL22,IL1RN,TNF,CCL2,SDC4,CCL4,ICAM1,IL36G,PECAM1,IL33
HMGB1 Signaling	5.29	0.12	4	RHOH,OSM,CSF2,MAPK12,MRAS,LTA,LIF,RHOC,GAB1,TNF,RHOB,CCL2,IL17A,IL12B,ICAM1,RHOV
Th2 Pathway	5.22	0.113	1.291	STAT4,SOCS3,JAG1,IL12RB2,IL2RA,GAB1,TNFSF4,IL9,DLL1,STAT5A,IL10,CRLF2,IL12B,ICAM1,TBX21,IL33,S1PR1
LXR/RXR Activation	5.15	0.124	-1.155	MYLIP,ITIH4,HMGCR,ABCA1,SAA1,NOS2,IL1RN,SCD,TNF,PTGS2,CCL2,ARG2,IL36G,PLTP,IL33
Communication between Innate and Adaptive Immune Cells	5.07	0.138	NaN	CCR7,CSF2,CCL5,CXCL10,CCL3L3,CD83,IL1RN,TNF,IL10,IL12B,CCL4,IL36G,IL33
Role of JAK1 and JAK3 in γc Cytokine Signaling	4.85	0.155	NaN	IL9,SOCS3,STAT1,IL7R,STAT5A,MRAS,IL2RA,CRLF2,GAB1,BLNK,IL7
Role of MAPK Signaling in the Pathogenesis of Influenza	4.79	0.153	NaN	CCL5,CXCL10,TNF,PTGS2,MAPK12,MRAS,CCL2,PLA2G4D,PLA2G4F,PNPLA8,PLA2G4A
Cholecystokinin/Gastrin-mediated Signaling	4.72	0.129	3.606	RHOH,MAPK12,MRAS,CCK,RHOC,IL1RN,TNF,PTGS2,RHOB,ITPR1,RHOV,IL36G,IL33
Altered T Cell and B Cell Signaling in Rheumatoid Arthritis	4.56	0.133	NaN	IL23A,SLAMF1,CSF2,IL1RN,TNF,CSF1,LTA,IL17A,IL10,IL12B,IL36G,IL33
Activation of IRF by Cytosolic Pattern Recognition Receptors	4.56	0.159	1.897	STAT1,TNF,MAPK12,ISG15,IFIH1,NFKBIB,LTA,IL10,IFIT2,FADD
Dendritic Cell Maturation	4.33	0.0933	3.5	CCR7,STAT4,CSF2,MAPK12,LTA,GAB1,ZBTB12,IL23A,CD83,IL1RN,STAT1,TNF,NFKBIB,IL10,IL12B,ICAM1,IL36G,IL33
Hepatic Cholestasis	4.27	0.1	NaN	OSM,CSF2,MAPK12,LTA,PPARA,LIF,ATP8B1,HSD3B7,IL1RN,TNF,NFKBIB,IL17A,IL12B,IL36G,IL33,CYP27A1
Role of Osteoblasts, Osteoclasts and Chondrocytes in Rheumatoid Arthritis	4.23	0.0858	NaN	ADAMTS4,CSF2,CTSK,MAPK12,GAB1,PPP3CC,FZD4,BIRC3,IL7,IL1RN,ADAMTS5,TNF,NFKBIB,CSF1,IL17A,IL10,ITGB3,IL36G,RUNX2,IL33
Role of Macrophages, Fibroblasts and Endothelial Cells in Rheumatoid Arthritis	4.18	0.0769	NaN	OSM,ADAMTS4,CSF2,CCL5,SOCS3,MRAS,LTA,GAB1,PPP3CC,FZD4,IL7,NOS2,IL1RN,TNF,CCL2,NFKBIB,CSF1,IL17A,IL10,TRAF4,ICAM1,VEGFB,IL36G,IL33
Hepatic Fibrosis / Hepatic Stellate Cell Activation	3.98	0.0909	NaN	CCR7,BAMBI,CCL5,COL27A1,STAT1,TNF,SMAD3,CCL2,ECE1,CSF1,EDN1,MET,IL10,IGFBP3,TIMP1,ICAM1,VEGFB
Hematopoiesis from Pluripotent Stem Cells	3.98	0.17	NaN	IL9,CSF2,CSF1,LIF,IL10,IL12B,CSF3,IL7
IL-17A Signaling in Gastric Cells	3.97	0.24	NaN	CCL5,CXCL10,TNF,MAPK12,CCL20,IL17A
Tec Kinase Signaling	3.96	0.0941	3.606	GNAI1,RHOH,STAT4,MAPK12,MRAS,TNFRSF21,RHOC,FADD,GAB1,TNFRSF25,STAT1,TNF,GNG4,RHOB,STAT5A,RHOV
Role of Pattern Recognition Receptors in Recognition of Bacteria and Viruses	3.91	0.102	2.646	OSM,CSF2,CCL5,NOD2,MAPK12,LTA,LIF,GAB1,TNF,IFIH1,IL17A,IL10,IL12B,PTX3
Toll-like Receptor Signaling	3.85	0.132	0.816	IL1RN,TNFAIP3,TNF,MAPK12,UBD,PPARA,IL12B,TRAF4,IL36G,IL33
Death Receptor Signaling	3.75	0.118	0.905	HSPB1,CFLAR,TNFSF15,TNF,PARP3,NFKBIB,TNFRSF21,FADD,BID,TNFRSF25,BIRC3
Semaphorin Signaling in Neurons	3.6	0.151	NaN	RHOH,PLXNA1,RHOB,SEMA7A,MET,RHOC,RHOV,RND1
IL-10 Signaling	3.49	0.13	NaN	IL1RN,SOCS3,TNF,MAPK12,NFKBIB,ARG2,IL10,IL36G,IL33
Role of IL-17A in Arthritis	3.49	0.13	NaN	NOS2,CCL5,PTGS2,MAPK12,CCL2,NFKBIB,CCL20,IL17A,GAB1
IL-17 Signaling	3.44	0.118	NaN	NOS2,CXCL10,PTGS2,MAPK12,MRAS,CCL2,IL17A,IL19,TIMP1,GAB1
Glioma Invasiveness Signaling	3.44	0.129	2.333	RHOH,ITGAV,RHOB,MRAS,RHOC,ITGB3,TIMP1,GAB1,RHOV
MIF Regulation of Innate Immunity	3.42	0.163	2.646	NOS2,PTGS2,MAPK12,NFKBIB,PLA2G4D,PLA2G4F,PLA2G4A
Hematopoiesis from Multipotent Stem Cells	3.39	0.333	NaN	CSF2,CSF1,CSF3,IL7
p38 MAPK Signaling	3.35	0.1	2.714	HSPB1,IL1RN,DUSP1,STAT1,TNF,MAPK12,PLA2G4D,PLA2G4F,FADD,IL36G,PLA2G4A,IL33
T Helper Cell Differentiation	3.3	0.123	NaN	STAT4,STAT1,TNF,IL12RB2,IL2RA,IL17A,IL10,IL12B,TBX21
IL-9 Signaling	3.3	0.156	1.633	IL9,SOCS3,STAT1,TNF,STAT5A,CISH,GAB1
IL-8 Signaling	3.23	0.0812	3.742	GNAI1,RHOH,ITGAV,MAPK12,MRAS,RHOC,GAB1,IL9,PTGS2,GNG4,RHOB,NFKBIB,ITGB3,ICAM1,RHOV,VEGFB
Oncostatin M Signaling	3.2	0.176	2.236	OSM,CHI3L1,STAT1,STAT5A,MRAS,EPAS1
MIF-mediated Glucocorticoid Regulation	3.13	0.171	1.342	NR3C1,PTGS2,NFKBIB,PLA2G4D,PLA2G4F,PLA2G4A
IL-12 Signaling and Production in Macrophages	3.1	0.089	NaN	IRF1,STAT4,MAPK12,IL12RB2,MST1R,GAB1,IL23A,NOS2,STAT1,TNF,NFKBIB,IL10,IL12B
VDR/RXR Activation	3.09	0.115	1	CSF2,THBD,CCL5,CXCL10,CYP27B1,IGFBP3,GADD45A,KLF4,RUNX2
Type I Diabetes Mellitus Signaling	3.09	0.0991	2.333	IRF1,NOS2,SOCS3,STAT1,TNF,MAPK12,NFKBIB,LTA,IL12B,FADD,BID
Role of JAK family kinases in IL-6-type Cytokine Signaling	3	0.2	NaN	OSM,SOCS3,STAT1,MAPK12,STAT5A
Neuroinflammation Signaling Pathway	2.98	0.0675	1.789	GLUL,CCL5,CXCL10,MAPK12,PLA2G4F,GAB1,PPP3CC,BIRC3,ZBTB12,GDNF,CFLAR,NOS2,STAT1,TNF,PTGS2,CCL2,PLA2G4D,IL10,IL12B,ICAM1,PLA2G4A
Acute Phase Response Signaling	2.96	0.0824	1.897	ITIH4,OSM,CFB,SOCS3,MAPK12,MRAS,SAA1,IL1RN,NR3C1,TNF,NFKBIB,HMOX2,IL36G,IL33
Eicosanoid Signaling	2.9	0.119	2.236	PTGES2,LTB4R,PTGS2,PLA2G4D,PLA2G4F,PNPLA8,PTGIR,PLA2G4A
Chondroitin Sulfate Degradation (Metazoa)	2.87	0.25	NaN	HEXB,TMEM2,CEMIP,HEXA
Dermatan Sulfate Degradation (Metazoa)	2.76	0.235	NaN	HEXB,TMEM2,CEMIP,HEXA
Role of PKR in Interferon Induction and Antiviral Response	2.75	0.146	NaN	IRF1,STAT1,TNF,NFKBIB,FADD,BID
MSP-RON Signaling Pathway	2.7	0.111	NaN	NOS2,TNF,CSF2RB,CCL2,CSF1,MST1R,IL12B,GAB1
GM-CSF Signaling	2.66	0.11	1.89	CSF2,STAT1,CSF2RB,PIM1,MRAS,CISH,GAB1,PPP3CC
D-myo-inositol (1,4,5,6)-Tetrakisphosphate Biosynthesis	2.66	0.0833	NaN	DUSP5,DUSP1,NUDT9,SOCS3,ATP1A1,TNS3,DOT1L,PPP1R13B,PTPN13,PTPN23,DUSP2,PTPN1
D-myo-inositol (3,4,5,6)-tetrakisphosphate Biosynthesis	2.66	0.0833	NaN	DUSP5,DUSP1,NUDT9,SOCS3,ATP1A1,TNS3,DOT1L,PPP1R13B,PTPN13,PTPN23,DUSP2,PTPN1
FXR/RXR Activation	2.64	0.0873	NaN	SAA1,ITIH4,IL1RN,TNF,MAPK12,PPARA,IL36G,PLTP,IL33,CYP27A1,SDC1
Pathogenesis of Multiple Sclerosis	2.63	0.333	NaN	CCL5,CXCL10,CCL4
Antioxidant Action of Vitamin C	2.63	0.0926	-3.162	CSF2,TNF,MAPK12,CSF2RB,STAT5A,NFKBIB,PLA2G4D,PLA2G4F,PNPLA8,PLA2G4A
TNFR2 Signaling	2.63	0.167	NaN	TNFAIP3,TNF,NFKBIB,LTA,BIRC3
Atherosclerosis Signaling	2.61	0.0866	NaN	IL1RN,TNF,CCL2,CSF1,PLA2G4D,PLA2G4F,PNPLA8,ICAM1,IL36G,PLA2G4A,IL33
TREM1 Signaling	2.59	0.107	2.828	CD83,CSF2,NOD2,TNF,STAT5A,CCL2,IL10,ICAM1
IL-6 Signaling	2.58	0.0859	2.714	HSPB1,IL1RN,SOCS3,TNFAIP6,TNF,MAPK12,MRAS,NFKBIB,GAB1,IL36G,IL33
Phagosome Maturation	2.56	0.0811	NaN	PRDX6,ZBTB12,ATP6V1B2,CTSK,ATP6V0D1,CTSB,TUBB1,CTSL,CTSA,TUBA1C,ATP6V1G1,CTSZ
Glucocorticoid Receptor Signaling	2.53	0.0619	NaN	CSF2,CCL5,MAPK12,MRAS,GAB1,PPP3CC,NOS2,IL1RN,DUSP1,SGK1,STAT1,NR3C1,TNF,PTGS2,SMAD3,STAT5A,CCL2,NFKBIB,IL10,ICAM1,GTF2H1
PPAR Signaling	2.49	0.0947	-2.333	IL1RN,TNF,PTGS2,STAT5A,MRAS,NFKBIB,PPARA,IL36G,IL33
Production of Nitric Oxide and Reactive Oxygen Species in Macrophages	2.42	0.0722	2.673	IRF1,RHOH,MAPK12,PPARA,RHOC,GAB1,NOS2,PPP1R3C,STAT1,TNF,RHOB,NFKBIB,ARG2,RHOV
ILK Signaling	2.37	0.0711	2.887	FERMT2,RHOH,MAPK12,ITGB8,RHOC,GAB1,PARVB,NOS2,TNF,PTGS2,RHOB,ITGB3,RHOV,VEGFB
Phospholipase C Signaling	2.34	0.0664	3.207	RHOH,ARHGEF3,MRAS,RHOC,PLA2G4F,PPP3CC,ARHGEF16,GNG4,RHOB,PLA2G4D,ITPR1,LAT,BLNK,RHOV,PLA2G4A,TGM2
3-phosphoinositide Degradation	2.33	0.0759	NaN	DUSP5,DUSP1,NUDT9,SOCS3,ATP1A1,TNS3,DOT1L,PPP1R13B,PTPN13,PTPN23,DUSP2,PTPN1
TWEAK Signaling	2.33	0.143	0.447	NFKBIB,FADD,BID,TNFRSF25,BIRC3
IL-17A Signaling in Fibroblasts	2.33	0.143	NaN	MAPK12,CCL2,NFKBIB,IL17A,NFKBIZ
Protein Kinase A Signaling	2.32	0.0575	0.229	GNAI1,SFN,NTN1,PDE1B,PTPN23,DUSP2,PPP3CC,PDE10A,PTPN1,PDE7A,DUSP5,PPP1R3C,DUSP1,PTGS2,RYR1,SMAD3,GNG4,NFKBIB,EBI3,ITPR1,PTPN13,AKAP6,DUSP4
Prolactin Signaling	2.31	0.0964	1.633	IRF1,SOCS3,STAT1,NR3C1,STAT5A,MRAS,GAB1,NMI
JAK/Stat Signaling	2.31	0.0964	0.707	STAT4,SOCS3,STAT1,STAT5A,MRAS,CISH,GAB1,PTPN1
TNFR1 Signaling	2.31	0.12	1.342	TNFAIP3,TNF,NFKBIB,FADD,BID,BIRC3
3-phosphoinositide Biosynthesis	2.31	0.07	NaN	NUDT9,SOCS3,ATP1A1,DOT1L,GAB1,PTPN23,DUSP2,PTPN1,DUSP5,DUSP1,TNS3,MET,PPP1R13B,PTPN13
Gαq Signaling	2.26	0.0745	2.53	RHOH,GNG4,RHOB,MRAS,NFKBIB,ITPR1,HRH1,RHOC,GAB1,RHOV,RGS16,PPP3CC
D-myo-inositol-5-phosphate Metabolism	2.24	0.0741	NaN	DUSP5,DUSP1,NUDT9,SOCS3,ATP1A1,TNS3,DOT1L,PPP1R13B,PTPN13,PTPN23,DUSP2,PTPN1
FLT3 Signaling in Hematopoietic Progenitor Cells	2.22	0.093	2.828	STAT4,FLT3,GAB2,STAT1,MAPK12,STAT5A,MRAS,GAB1
cAMP-mediated signaling	2.21	0.0661	1.387	GNAI1,LPAR1,GRK4,HCAR3,PDE1B,PPP3CC,PDE10A,LTB4R,PDE7A,DUSP1,PKIG,PTGIR,AKAP6,DUSP4,S1PR1
IL-22 Signaling	2.19	0.167	1	SOCS3,STAT1,MAPK12,STAT5A
Tumoricidal Function of Hepatic Natural Killer Cells	2.19	0.167	NaN	SERPINB9,FADD,ICAM1,BID
Bile Acid Biosynthesis, Neutral Pathway	2.14	0.231	NaN	HSD3B7,CYP3A4,CYP27A1
Caveolar-mediated Endocytosis Signaling	2.14	0.0986	NaN	ZBTB12,ITGAV,CD48,ITGB8,ITGB3,ITGA9,PTPN1
Crosstalk between Dendritic Cells and Natural Killer Cells	2.13	0.0899	NaN	CCR7,CD83,CSF2,TNF,CSF2RB,LTA,IL12B,TLN2
G-Protein Coupled Receptor Signaling	2.13	0.0616	NaN	GNAI1,LPAR1,GRK4,MRAS,HCAR3,PDE1B,HRH1,GAB1,RGS16,PDE10A,LTB4R,PDE7A,DUSP1,NFKBIB,PTGIR,DUSP4,S1PR1
Osteoarthritis Pathway	2.11	0.0664	3.606	SLC39A8,ADAMTS4,JAG1,FADD,FZD4,NOS2,ADAMTS5,TNF,PTGS2,SMAD3,SDC4,EPAS1,VEGFB,RUNX2
Endothelin-1 Signaling	2.1	0.0684	3.464	GNAI1,MAPK12,MRAS,PLA2G4F,GAB1,NOS2,PTGS2,ECE1,EDN1,PLA2G4D,ITPR1,PNPLA8,PLA2G4A
Superpathway of Inositol Phosphate Compounds	2.07	0.0638	NaN	NUDT9,SOCS3,ATP1A1,DOT1L,GAB1,PTPN23,DUSP2,PTPN1,DUSP5,DUSP1,TNS3,MET,ITPKC,PPP1R13B,PTPN13
IL-15 Signaling	1.98	0.0921	NaN	CSF2,TNF,MAPK12,STAT5A,MRAS,IL17A,GAB1
Salvage Pathways of Pyrimidine Ribonucleotides	1.97	0.0842	NaN	CDA,GRK4,SGK1,PIM1,UPRT,APOBEC3A,CDK6,PRKX
RhoGDI Signaling	1.95	0.0678	-3.162	GNAI1,RHOH,ARHGEF3,ARHGEF16,GNG4,RHOB,MRAS,EZR,ARHGAP35,RHOC,CDH23,RHOV
LPS/IL-1 Mediated Inhibition of RXR Function	1.93	0.0631	-1.342	ALAS1,ABCA1,PPARA,CYP3A4,ACSL4,IL1RN,ACSL5,TNF,FABP5,IL36G,HS3ST1,PLTP,IL33,CHST15
Induction of Apoptosis by HIV1	1.89	0.0984	0.816	TNF,MAPK12,NFKBIB,FADD,BID,BIRC3
CD40 Signaling	1.89	0.0886	0.816	TNFAIP3,PTGS2,MAPK12,NFKBIB,LTA,GAB1,ICAM1
Colorectal Cancer Metastasis Signaling	1.87	0.0605	3.207	RHOH,MAPK12,MRAS,RHOC,GAB1,FZD4,NOS2,STAT1,TNF,PTGS2,SMAD3,GNG4,RHOB,RHOV,VEGFB
Regulation of IL-2 Expression in Activated and Anergic T Lymphocytes	1.86	0.0875	NaN	TOB1,MAPK12,SMAD3,MRAS,NFKBIB,LAT,PPP3CC
iNOS Signaling	1.86	0.111	2	IRF1,NOS2,STAT1,MAPK12,NFKBIB
Fc Epsilon RI Signaling	1.86	0.0756	NaN	CSF2,TNF,MAPK12,MRAS,PLA2G4D,PLA2G4F,LAT,GAB1,PLA2G4A
Glycerol Degradation I	1.86	0.333	NaN	GK5,GPD2
Lactose Degradation III	1.86	0.333	NaN	GLB1L3,LCT
Macropinocytosis Signaling	1.84	0.0864	2	MRC1,MRAS,CSF1,MET,ITGB8,ITGB3,GAB1
γ-linolenate Biosynthesis II (Animals)	1.81	0.176	NaN	ACSL4,ACSL5,FADS2
IL-3 Signaling	1.78	0.0843	2.646	GAB2,STAT1,CSF2RB,STAT5A,MRAS,GAB1,PPP3CC
PXR/RXR Activation	1.77	0.0923	NaN	ALAS1,SCD,NR3C1,TNF,PPARA,CYP3A4
Leukocyte Extravasation Signaling	1.75	0.0616	1.897	GNAI1,RHOH,F11R,CTTN,MAPK12,EZR,ARHGAP35,CLDN4,GAB1,ITGB3,TIMP1,ICAM1,PECAM1
Adenine and Adenosine Salvage III	1.72	0.286	NaN	ADA,PNP
GADD45 Signaling	1.67	0.158	NaN	GADD45B,GADD45A,GADD45G
Purine Nucleotides Degradation II (Aerobic)	1.67	0.158	NaN	ADA,PNP,GDA
VEGF Family Ligand-Receptor Interactions	1.66	0.0795	2.449	NRP2,MRAS,PLA2G4D,PLA2G4F,GAB1,VEGFB,PLA2G4A
Role of JAK2 in Hormone-like Cytokine Signaling	1.66	0.118	NaN	SOCS3,STAT1,STAT5A,PTPN1
CCR5 Signaling in Macrophages	1.65	0.087	NaN	GNAI1,CCL5,MAPK12,GNG4,MRAS,CCL4
CCR3 Signaling in Eosinophils	1.64	0.0692	NaN	GNAI1,MAPK12,GNG4,MRAS,PLA2G4D,ITPR1,PLA2G4F,GAB1,PLA2G4A
Integrin Signaling	1.63	0.0594	3.051	RHOH,ITGAV,CTTN,MRAS,ITGB8,RHOC,GAB1,TLN2,ITGA9,PARVB,RHOB,ITGB3,RHOV
Myc Mediated Apoptosis Signaling	1.62	0.0857	NaN	SFN,MAPK12,MRAS,FADD,GAB1,BID
Purine Ribonucleosides Degradation to Ribose-1-phosphate	1.6	0.25	NaN	ADA,PNP
Salvage Pathways of Pyrimidine Deoxyribonucleotides	1.6	0.25	NaN	CDA,APOBEC3A
Chemokine Signaling	1.6	0.0845	2.449	GNAI1,CCL5,MAPK12,MRAS,CCL2,CCL4
IL-7 Signaling Pathway	1.59	0.0769	2.646	STAT1,MAPK12,IL7R,STAT5A,MET,GAB1,IL7
ERK/MAPK Signaling	1.57	0.06	1.155	HSPB1,PPP1R3C,DUSP1,STAT1,MRAS,PLA2G4D,PLA2G4F,GAB1,TLN2,DUSP2,PLA2G4A,DUSP4
Interferon Signaling	1.57	0.111	2	IRF1,STAT1,IFIT3,ISG15
Paxillin Signaling	1.56	0.0708	2	ITGAV,MAPK12,MRAS,ITGB8,ITGB3,GAB1,TLN2,ITGA9
NF-κB Signaling	1.52	0.0608	2.111	IL1RN,TNFAIP3,TNF,MRAS,NFKBIB,LTA,FADD,GAB1,PELI1,IL36G,IL33
Thrombin Signaling	1.52	0.0588	3.317	GNAI1,RHOH,ARHGEF3,ARHGEF16,MAPK12,GNG4,RHOB,MRAS,ITPR1,RHOC,GAB1,RHOV
Signaling by Rho Family GTPases	1.5	0.0556	3.464	GNAI1,RHOH,ARHGEF3,MAPK12,MRAS,EZR,RHOC,GAB1,ARHGEF16,GNG4,RHOB,CDH23,CDC42EP2,RHOV
Prostanoid Biosynthesis	1.5	0.222	NaN	PTGES2,PTGS2
Glutamine Biosynthesis I	1.5	1	NaN	GLUL
Xanthine and Xanthosine Salvage	1.5	1	NaN	PNP
Notch Signaling	1.5	0.105	NaN	DLL1,JAG1,DTX2,DLL4
Actin Nucleation by ARP-WASP Complex	1.49	0.0893	2.236	RHOH,RHOB,MRAS,RHOC,RHOV
Sumoylation Pathway	1.48	0.0729	1.633	RHOH,NR3C1,MAPK12,RHOB,RHOC,RHOV,ISG20
IL-17A Signaling in Airway Cells	1.42	0.0769	1	MAPK12,NFKBIB,CCL20,IL17A,IL19,GAB1
CXCR4 Signaling	1.42	0.0606	3	GNAI1,RHOH,MAPK12,GNG4,RHOB,MRAS,ITPR1,RHOC,GAB1,RHOV
Renin-Angiotensin Signaling	1.39	0.0656	2.646	CCL5,STAT1,TNF,MAPK12,MRAS,CCL2,ITPR1,GAB1
Role of Tissue Factor in Cancer	1.37	0.065	NaN	CSF2,ITGAV,MAPK12,STAT5A,MRAS,CSF1,ITGB3,GAB1
Sphingosine-1-phosphate Signaling	1.33	0.064	2.828	GNAI1,RHOH,RHOB,RHOC,GAB1,RHOV,S1PR5,S1PR1
Retinoic acid Mediated Apoptosis Signaling	1.33	0.0806	1.342	IRF1,CFLAR,PARP3,FADD,BID
autophagy	1.33	0.0806	NaN	CTSK,CTSB,CTSL,CTSA,CTSZ
Synaptic Long Term Depression	1.33	0.0608	3	GNAI1,NOS2,RYR1,MRAS,PLA2G4D,ITPR1,PLA2G4F,PNPLA8,PLA2G4A
Molecular Mechanisms of Cancer	1.32	0.0482	NaN	GNAI1,RHOH,ARHGEF3,MAPK12,MRAS,RHOC,FADD,GAB1,FZD4,BIRC3,CFLAR,ARHGEF16,GAB2,SMAD3,RHOB,NFKBIB,CDK6,RHOV,BID
Sperm Motility	1.3	0.063	2.828	MRAS,PDE1B,PLA2G4D,ITPR1,MST1R,PLA2G4F,PNPLA8,PLA2G4A
Germ Cell-Sertoli Cell Junction Signaling	1.3	0.0578	NaN	RHOH,TNF,MAPK12,RHOB,MRAS,TUBB1,RHOC,GAB1,TUBA1C,RHOV
Role of RIG1-like Receptors in Antiviral Innate Immunity	1.3	0.0909	NaN	TRIM25,IFIH1,NFKBIB,FADD
Small Cell Lung Cancer Signaling	1.27	0.0706	NaN	PTGS2,NFKBIB,GAB1,TRAF4,CDK6,BID
Clathrin-mediated Endocytosis Signaling	1.27	0.0553	NaN	CTTN,UBD,MET,ITGB8,ITGB3,SH3BP4,GAB1,VEGFB,STAM,PPP3CC,TFRC
Guanosine Nucleotides Degradation III	1.27	0.167	NaN	PNP,GDA
Role of IL-17F in Allergic Inflammatory Airway Diseases	1.27	0.0889	NaN	CSF2,CXCL10,CCL2,CCL4
Thrombopoietin Signaling	1.26	0.0769	2.236	GAB2,STAT1,STAT5A,MRAS,GAB1
Pyridoxal 5'-phosphate Salvage Pathway	1.26	0.0769	NaN	GRK4,SGK1,PIM1,CDK6,PRKX
Triacylglycerol Biosynthesis	1.24	0.087	NaN	LPGAT1,AGPAT4,PLPPR2,DGAT2
IL-15 Production	1.24	0.107	NaN	IRF1,STAT1,MST1R
ERK5 Signaling	1.23	0.0758	2.236	SFN,SGK1,MRAS,LIF,GAB1
PEDF Signaling	1.23	0.069	1.342	GDNF,CFLAR,MAPK12,MRAS,NFKBIB,GAB1
TGF-β Signaling	1.23	0.069	2.449	INHBA,MAPK12,SMAD3,MRAS,TGIF1,RUNX2
Role of IL-17A in Psoriasis	1.2	0.154	NaN	CCL20,IL17A
Fatty Acid Activation	1.2	0.154	NaN	ACSL4,ACSL5
Oleate Biosynthesis II (Animals)	1.2	0.154	NaN	SCD,FADS2
Guanine and Guanosine Salvage I	1.2	0.5	NaN	PNP
Adenine and Adenosine Salvage I	1.2	0.5	NaN	PNP
Relaxin Signaling	1.2	0.0573	1	GNAI1,NOS2,PDE7A,GNG4,MRAS,NFKBIB,PDE1B,GAB1,PDE10A
Amyotrophic Lateral Sclerosis Signaling	1.19	0.0631	NaN	RNF19A,GDNF,GLUL,GAB1,BID,VEGFB,BIRC3
p53 Signaling	1.19	0.0631	NaN	SFN,DRAM1,PPP1R13B,GADD45B,GADD45A,GAB1,GADD45G
Graft-versus-Host Disease Signaling	1.18	0.0833	NaN	IL1RN,TNF,IL36G,IL33
Agrin Interactions at Neuromuscular Junction	1.17	0.0725	2.236	CTTN,MAPK12,MRAS,AGRN,ITGB3
Glioblastoma Multiforme Signaling	1.13	0.0556	2.828	RHOH,RHOB,MRAS,ITPR1,RHOC,GAB1,CDK6,RHOV,FZD4
Acute Myeloid Leukemia Signaling	1.12	0.0645	1.342	FLT3,CSF2RB,STAT5A,PIM1,MRAS,GAB1
Cardiac β-adrenergic Signaling	1.1	0.0571	0.816	PDE7A,PPP1R3C,GNG4,MRAS,PDE1B,PKIG,AKAP6,PDE10A
Cytotoxic T Lymphocyte-mediated Apoptosis of Target Cells	1.09	0.0938	NaN	ZBTB12,FADD,BID
Fatty Acid β-oxidation I	1.09	0.0938	NaN	ACSL4,SDS,ACSL5
Superpathway of Citrulline Metabolism	1.09	0.133	NaN	NOS2,ARG2
Sirtuin Signaling Pathway	1.08	0.0481	1.387	MAPK12,ABCA1,PPARA,DOT1L,GADD45B,TUBA1C,NOS2,TNF,ARG2,RRP9,GADD45A,EPAS1,PPIF,GADD45G
GPCR-Mediated Integration of Enteroendocrine Signaling Exemplified by an L Cell	1.08	0.0685	NaN	GNAI1,NMB,CCK,ITPR1,GAL
STAT3 Pathway	1.06	0.0676	0.447	SOCS3,MAPK12,PIM1,MRAS,CISH
FcγRIIB Signaling in B Lymphocytes	1.06	0.0755	2	MAPK12,MRAS,GAB1,BLNK
Hereditary Breast Cancer Signaling	1.05	0.0556	NaN	SFN,MRAS,UBD,GADD45B,GADD45A,GAB1,CDK6,GADD45G
Adenosine Nucleotides Degradation II	1.04	0.125	NaN	ADA,PNP
Diphthamide Biosynthesis	1.03	0.333	NaN	DPH5
1,25-dihydroxyvitamin D3 Biosynthesis	1.03	0.333	NaN	CYP27B1
Inosine-5'-phosphate Biosynthesis II	1.03	0.333	NaN	ATIC
Thiosulfate Disproportionation III (Rhodanese)	1.03	0.333	NaN	TST
L-serine Degradation	1.03	0.333	NaN	SDS
N-acetylglucosamine Degradation I	1.03	0.333	NaN	AMDHD2
Gap Junction Signaling	1.03	0.0513	NaN	GNAI1,GJB2,GJA5,LPAR1,MRAS,TUBB1,ITPR1,GAB1,TUBA1C,PPP3CC
GDNF Family Ligand-Receptor Interactions	1.03	0.0658	2	GDNF,MAPK12,MRAS,ITPR1,GAB1
fMLP Signaling in Neutrophils	1.01	0.0569	1.633	GNAI1,GNG4,MRAS,NFKBIB,ITPR1,GAB1,PPP3CC
iCOS-iCOSL Signaling in T Helper Cells	1.01	0.0569	2.236	GAB2,NFKBIB,IL2RA,ITPR1,LAT,GAB1,PPP3CC
Mitochondrial L-carnitine Shuttle Pathway	0.999	0.118	NaN	ACSL4,ACSL5
Virus Entry via Endocytic Pathways	0.972	0.0588	NaN	ZBTB12,MRAS,ITGB8,ITGB3,GAB1,TFRC
Regulation of Cellular Mechanics by Calpain Protease	0.969	0.0702	NaN	MRAS,EZR,CDK6,TLN2
Gustation Pathway	0.956	0.0551	NaN	P2RY8,PDE7A,PDE1B,P2RX5,ITPR1,P2RY6,PDE10A
Type II Diabetes Mellitus Signaling	0.943	0.0547	2	ACSL4,ACSL5,SOCS3,TNF,MAPK12,NFKBIB,GAB1
SAPK/JNK Signaling	0.943	0.0577	0.816	MAPK12,MRAS,GADD45A,FADD,GAB1,DUSP4
Sertoli Cell-Sertoli Cell Junction Signaling	0.938	0.0506	NaN	F11R,NOS2,TNF,MAPK12,YBX3,MRAS,TUBB1,CLDN4,TUBA1C
Erythropoietin Signaling	0.937	0.0617	NaN	SOCS3,STAT5A,MRAS,NFKBIB,GAB1
Breast Cancer Regulation by Stathmin1	0.922	0.0488	NaN	GNAI1,ARHGEF3,ARHGEF16,PPP1R3C,GNG4,MRAS,TUBB1,ITPR1,GAB1,TUBA1C
Airway Inflammation in Asthma	0.916	0.25	NaN	TNF
Arsenate Detoxification I (Glutaredoxin)	0.916	0.25	NaN	PNP
Uracil Degradation II (Reductive)	0.916	0.25	NaN	UPB1
Heme Degradation	0.916	0.25	NaN	HMOX2
Spermine and Spermidine Degradation I	0.916	0.25	NaN	SAT1
Thymine Degradation	0.916	0.25	NaN	UPB1
Glycerol-3-phosphate Shuttle	0.916	0.25	NaN	GPD2
Arginine Degradation I (Arginase Pathway)	0.916	0.25	NaN	ARG2
N-acetylglucosamine Degradation II	0.916	0.25	NaN	AMDHD2
Chronic Myeloid Leukemia Signaling	0.914	0.0566	NaN	GAB2,SMAD3,STAT5A,MRAS,GAB1,CDK6
Mouse Embryonic Stem Cell Pluripotency	0.914	0.0566	2.449	ID2,MAPK12,MRAS,LIF,GAB1,FZD4
14-3-3-mediated Signaling	0.905	0.0534	2.236	SFN,TNF,MAPK12,MRAS,TUBB1,GAB1,TUBA1C
Netrin Signaling	0.898	0.0769	NaN	NTN1,RYR1,PPP3CC
Inhibition of Matrix Metalloproteases	0.898	0.0769	NaN	TFPI2,TIMP1,SDC1
Inflammasome pathway	0.88	0.1	NaN	NOD2,CTSB
Axonal Guidance Signaling	0.876	0.042	NaN	ADAM9,GNAI1,EFNB2,ADAMTS4,NRP2,NTN1,MRAS,TUBB1,GAB1,TUBA1C,PPP3CC,RND1,FZD4,PLXNA1,ADAMTS5,GNG4,SEMA7A,MET,VEGFB
Cardiac Hypertrophy Signaling	0.875	0.0466	2.53	HSPB1,GNAI1,RHOH,MAPK12,GNG4,RHOB,MRAS,RHOC,GAB1,RHOV,PPP3CC
Growth Hormone Signaling	0.873	0.0588	1.342	STAT1,SOCS3,STAT5A,IGFBP3,GAB1
Phospholipases	0.871	0.0645	NaN	PLA2G4D,PLA2G4F,PNPLA8,PLA2G4A
Role of NFAT in Regulation of the Immune Response	0.855	0.0484	2.449	GNAI1,GNG4,MRAS,NFKBIB,ITPR1,LAT,GAB1,BLNK,PPP3CC
CNTF Signaling	0.853	0.0635	2	STAT1,MRAS,GAB1,CNTFR
tRNA Splicing	0.851	0.0732	NaN	PDE7A,PDE1B,PDE10A
NF-κB Activation by Viruses	0.843	0.0575	2.236	ITGAV,MRAS,NFKBIB,ITGB3,GAB1
IL-2 Signaling	0.836	0.0625	2	STAT5A,MRAS,IL2RA,GAB1
HER-2 Signaling in Breast Cancer	0.828	0.0568	NaN	MRAS,ITGB8,ITGB3,GAB1,CDK6
Serine Biosynthesis	0.826	0.2	NaN	PSAT1
Tetrapyrrole Biosynthesis II	0.826	0.2	NaN	ALAS1
CMP-N-acetylneuraminate Biosynthesis I (Eukaryotes)	0.826	0.2	NaN	CMAS
Citrulline-Nitric Oxide Cycle	0.826	0.2	NaN	NOS2
RAR Activation	0.816	0.0474	NaN	SORBS3,DHRS9,DUSP1,MAPK12,SMAD3,CSF2RB,STAT5A,IGFBP3,GTF2H1
Apoptosis Signaling	0.8	0.0556	0.447	TNF,MRAS,NFKBIB,BID,BIRC3
Insulin Receptor Signaling	0.788	0.0496	0.816	PPP1R3C,SGK1,SOCS3,MRAS,GAB1,STX4,PTPN1
Reelin Signaling in Neurons	0.772	0.0543	NaN	ARHGEF3,ARHGEF16,MAPK12,ITGB3,GAB1
IL-1 Signaling	0.772	0.0543	NaN	GNAI1,MAPK12,GNG4,MRAS,NFKBIB
EGF Signaling	0.769	0.0588	2	STAT1,MAPK12,ITPR1,GAB1
Human Embryonic Stem Cell Pluripotency	0.766	0.049	NaN	INHBA,SMAD3,MRAS,GAB1,FZD4,S1PR5,S1PR1
HIF1α Signaling	0.76	0.0508	NaN	NOS2,MAPK12,MRAS,EDN1,GAB1,VEGFB
Ceramide Signaling	0.759	0.0538	1.342	TNF,MRAS,GAB1,S1PR5,S1PR1
Urea Cycle	0.754	0.167	NaN	ARG2
Arginine Degradation VI (Arginase 2 Pathway)	0.754	0.167	NaN	ARG2
UDP-N-acetyl-D-glucosamine Biosynthesis II	0.754	0.167	NaN	GFPT2
Glutathione Redox Reactions I	0.753	0.0833	NaN	PRDX6,GPX7
CDP-diacylglycerol Biosynthesis I	0.753	0.0833	NaN	LPGAT1,AGPAT4
Remodeling of Epithelial Adherens Junctions	0.753	0.058	NaN	Mapre2,TUBB1,MET,TUBA1C
Pancreatic Adenocarcinoma Signaling	0.737	0.05	2.236	STAT1,PTGS2,MAPK12,SMAD3,GAB1,VEGFB
Gαi Signaling	0.737	0.05	2	GNAI1,LPAR1,LTB4R,GNG4,MRAS,S1PR1
Primary Immunodeficiency Signaling	0.709	0.0625	NaN	ADA,IL7R,BLNK
Antiproliferative Role of TOB in T Cell Signaling	0.7	0.0769	NaN	TOB1,SMAD3
Phosphatidylglycerol Biosynthesis II (Non-plastidic)	0.7	0.0769	NaN	LPGAT1,AGPAT4
ATM Signaling	0.695	0.051	NaN	MAPK12,GADD45B,GADD45A,BID,GADD45G
Ephrin B Signaling	0.694	0.0548	NaN	GNAI1,EFNB2,GNG4,MRAS
Superpathway of Serine and Glycine Biosynthesis I	0.694	0.143	NaN	PSAT1
Ceramide Biosynthesis	0.694	0.143	NaN	SPTSSA
RhoA Signaling	0.693	0.0484	1	PLXNA1,LPAR1,NRP2,EZR,ARHGAP35,CDC42EP2
PI3K/AKT Signaling	0.682	0.048	1	SFN,GAB2,PTGS2,MRAS,NFKBIB,GAB1
Heparan Sulfate Biosynthesis (Late Stages)	0.666	0.0533	NaN	PRDX6,EXT1,HS3ST1,CHST15
RANK Signaling in Osteoclasts	0.649	0.049	2	MAPK12,NFKBIB,GAB1,PPP3CC,BIRC3
Airway Pathology in Chronic Obstructive Pulmonary Disease	0.642	0.125	NaN	TNF
Superoxide Radicals Degradation	0.642	0.125	NaN	GPX7
Tryptophan Degradation to 2-amino-3-carboxymuconate Semialdehyde	0.642	0.125	NaN	IDO1
Sphingomyelin Metabolism	0.642	0.125	NaN	SGMS2
Non-Small Cell Lung Cancer Signaling	0.64	0.0519	NaN	MRAS,ITPR1,GAB1,CDK6
PI3K Signaling in B Lymphocytes	0.632	0.0462	2.449	MRAS,NFKBIB,ITPR1,BLNK,PPP3CC,ATF3
Phagosome Formation	0.632	0.0462	NaN	RHOH,MRC1,RHOB,RHOC,GAB1,RHOV
Angiopoietin Signaling	0.627	0.0513	NaN	STAT5A,MRAS,NFKBIB,GAB1
Estrogen-Dependent Breast Cancer Signaling	0.627	0.0513	NaN	STAT5A,MRAS,GAB1,HSD17B11
CD27 Signaling in Lymphocytes	0.625	0.0566	NaN	MAPK12,NFKBIB,BID
Triacylglycerol Degradation	0.625	0.0566	NaN	PRDX6,ABHD2,MGLL
Role of PI3K/AKT Signaling in the Pathogenesis of Influenza	0.614	0.0506	1	GNAI1,CCL5,NFKBIB,GAB1
CD28 Signaling in T Helper Cells	0.613	0.0455	2.236	MAPK12,NFKBIB,ITPR1,LAT,GAB1,PPP3CC
UVA-Induced MAPK Signaling	0.605	0.0472	2.236	STAT1,PARP3,MAPK12,MRAS,GAB1
IGF-1 Signaling	0.605	0.0472	NaN	SFN,SOCS3,MRAS,IGFBP3,GAB1
Citrulline Biosynthesis	0.598	0.111	NaN	ARG2
Heme Biosynthesis II	0.598	0.111	NaN	ALAS1
P2Y Purigenic Receptor Signaling Pathway	0.595	0.0448	1.342	GNAI1,GNG4,MRAS,ITGB3,GAB1,P2RY6
Adipogenesis pathway	0.595	0.0448	NaN	EZH2,TNF,NOCT,SMAD3,FZD4,GTF2H1
Gα12/13 Signaling	0.585	0.0444	1.342	LPAR1,MAPK12,MRAS,NFKBIB,CDH23,GAB1
Heparan Sulfate Biosynthesis	0.578	0.0488	NaN	PRDX6,EXT1,HS3ST1,CHST15
T Cell Receptor Signaling	0.575	0.0459	NaN	MRAS,LAT,GAB1,SHB,PPP3CC
4-1BB Signaling in T Lymphocytes	0.567	0.0625	NaN	MAPK12,NFKBIB
G Protein Signaling Mediated by Tubby	0.567	0.0625	NaN	GNG4,MRAS
Renal Cell Carcinoma Signaling	0.567	0.0482	NaN	MRAS,UBD,MET,GAB1
Gαs Signaling	0.565	0.0455	2	RYR1,GNG4,MRAS,HCAR3,PTGIR
Role of NFAT in Cardiac Hypertrophy	0.565	0.0415	NaN	GNAI1,MAPK12,GNG4,MRAS,ITPR1,LIF,GAB1,PPP3CC
Glycine Betaine Degradation	0.559	0.1	NaN	SDS
Androgen Signaling	0.555	0.045	NaN	GNAI1,SMAD3,GNG4,MRAS,GTF2H1
Corticotropin Releasing Hormone Signaling	0.537	0.0442	NaN	GNAI1,NOS2,PTGS2,MAPK12,ITPR1
Nitric Oxide Signaling in the Cardiovascular System	0.537	0.0442	2	PDE1B,ARG2,ITPR1,GAB1,VEGFB
GPCR-Mediated Nutrient Sensing in Enteroendocrine Cells	0.534	0.0465	NaN	GNAI1,GNG4,CCK,ITPR1
Inhibition of Angiogenesis by TSP1	0.531	0.0588	NaN	MAPK12,SDC1
Purine Nucleotides De Novo Biosynthesis II	0.524	0.0909	NaN	ATIC
Mineralocorticoid Biosynthesis	0.524	0.0909	NaN	HSD3B7
α-Adrenergic Signaling	0.524	0.046	NaN	GNAI1,GNG4,MRAS,ITPR1
LPS-stimulated MAPK Signaling	0.524	0.046	2	MAPK12,MRAS,NFKBIB,GAB1
HIPPO signaling	0.524	0.046	NaN	SFN,PPP1R3C,SMAD3,FRMD6
HGF Signaling	0.518	0.0435	2	PTGS2,MAPK12,MRAS,MET,GAB1
B Cell Development	0.514	0.0571	NaN	IL7R,IL7
Ovarian Cancer Signaling	0.51	0.0417	NaN	PTGS2,MRAS,EDN1,GAB1,VEGFB,FZD4
IL-4 Signaling	0.503	0.0449	NaN	NR3C1,MRAS,IRF4,GAB1
Regulation of Actin-based Motility by Rho	0.493	0.0444	2	RHOH,RHOB,RHOC,RHOV
Pregnenolone Biosynthesis	0.493	0.0833	NaN	MICAL2
Glucocorticoid Biosynthesis	0.493	0.0833	NaN	HSD3B7
FGF Signaling	0.484	0.044	2	MAPK12,MET,ITPR1,GAB1
Ethanol Degradation II	0.482	0.0541	NaN	DHRS9,ADHFE1
Fcγ Receptor-mediated Phagocytosis in Macrophages and Monocytes	0.465	0.043	2	CSF2,GAB2,EZR,TLN2
Urate Biosynthesis/Inosine 5'-phosphate Degradation	0.465	0.0769	NaN	PNP
Mevalonate Pathway I	0.465	0.0769	NaN	HMGCR
Mitotic Roles of Polo-Like Kinase	0.455	0.0455	NaN	PLK3,PLK2,PTTG1
April Mediated Signaling	0.452	0.0513	NaN	MAPK12,NFKBIB
Estrogen Biosynthesis	0.452	0.0513	NaN	CYP3A4,HSD17B11
tRNA Charging	0.452	0.0513	NaN	TARS,CARS
Lymphotoxin β Receptor Signaling	0.445	0.0448	NaN	LTA,GAB1,TRAF4
Isoleucine Degradation I	0.439	0.0714	NaN	SDS
Androgen Biosynthesis	0.439	0.0714	NaN	HSD3B7
Thyroid Cancer Signaling	0.438	0.05	NaN	GDNF,MRAS
Noradrenaline and Adrenaline Degradation	0.438	0.05	NaN	DHRS9,ADHFE1
B Cell Activating Factor Signaling	0.425	0.0488	NaN	MAPK12,NFKBIB
ErbB2-ErbB3 Signaling	0.424	0.0435	NaN	STAT5A,MRAS,GAB1
nNOS Signaling in Skeletal Muscle Cells	0.415	0.0667	NaN	RYR1
NAD biosynthesis II (from tryptophan)	0.415	0.0667	NaN	IDO1
Histidine Degradation VI	0.415	0.0667	NaN	MICAL2
Regulation of the Epithelial-Mesenchymal Transition Pathway	0.403	0.037	NaN	JAG1,ID2,SMAD3,MRAS,MET,GAB1,FZD4
Stearate Biosynthesis I (Animals)	0.399	0.0465	NaN	ACSL4,ACSL5
UVC-Induced MAPK Signaling	0.399	0.0465	NaN	MAPK12,MRAS
PAK Signaling	0.397	0.0396	2	TNF,MAPK12,MRAS,GAB1
Granzyme B Signaling	0.394	0.0625	NaN	BID
Extrinsic Prothrombin Activation Pathway	0.394	0.0625	NaN	THBD
Parkinson's Signaling	0.394	0.0625	NaN	MAPK12
B Cell Receptor Signaling	0.392	0.0366	2.646	GAB2,MAPK12,MRAS,NFKBIB,GAB1,BLNK,PPP3CC
VEGF Signaling	0.382	0.0388	2	SFN,MRAS,GAB1,VEGFB
PKCθ Signaling in T Lymphocytes	0.38	0.0376	2.236	MRAS,NFKBIB,LAT,GAB1,PPP3CC
Pyrimidine Ribonucleotides Interconversion	0.375	0.0444	NaN	NUDT9,SMARCA1
Superpathway of Geranylgeranyldiphosphate Biosynthesis I (via Mevalonate)	0.374	0.0588	NaN	HMGCR
GP6 Signaling Pathway	0.374	0.0373	2.236	COL27A1,ITPR1,ITGB3,LAT,GAB1
Systemic Lupus Erythematosus Signaling	0.372	0.0356	NaN	IL1RN,TNF,MRAS,IL10,LAT,GAB1,IL36G,IL33
Hypoxia Signaling in the Cardiovascular System	0.369	0.04	NaN	UBE2S,NFKBIB,EDN1
Dermatan Sulfate Biosynthesis (Late Stages)	0.364	0.0435	NaN	HS3ST1,CHST15
Antiproliferative Role of Somatostatin Receptor 2	0.36	0.0395	NaN	GNG4,MRAS,GAB1
BMP signaling pathway	0.36	0.0395	NaN	MAPK12,MRAS,RUNX2
Tight Junction Signaling	0.357	0.0359	NaN	F11R,TNF,YBX3,TIAM1,CLDN4,STX4
Valine Degradation I	0.355	0.0556	NaN	SDS
Pyrimidine Ribonucleotides De Novo Biosynthesis	0.353	0.0426	NaN	NUDT9,SMARCA1
mTOR Signaling	0.34	0.0348	2.449	RHOH,RHOB,MRAS,RHOC,GAB1,RHOV,VEGFB
Ubiquinol-10 Biosynthesis (Eukaryotic)	0.338	0.0526	NaN	MICAL2
1D-myo-inositol Hexakisphosphate Biosynthesis II (Mammalian)	0.338	0.0526	NaN	ITPKC
D-myo-inositol (1,3,4)-trisphosphate Biosynthesis	0.338	0.0526	NaN	ITPKC
DNA damage-induced 14-3-3σ Signaling	0.338	0.0526	NaN	SFN
Chondroitin Sulfate Biosynthesis (Late Stages)	0.333	0.0408	NaN	HS3ST1,CHST15
Cell Cycle: G2/M DNA Damage Checkpoint Regulation	0.333	0.0408	NaN	SFN,GADD45A
Cancer Drug Resistance By Drug Efflux	0.333	0.0408	NaN	PTGS2,MRAS
The Visual Cycle	0.322	0.05	NaN	DHRS9
Ephrin Receptor Signaling	0.315	0.0343	NaN	GNAI1,EFNB2,GNG4,MRAS,PTPN13,VEGFB
Docosahexaenoic Acid (DHA) Signaling	0.305	0.0385	NaN	GAB1,BID
Epithelial Adherens Junction Signaling	0.304	0.0342	NaN	DLL1,MRAS,TUBB1,MET,TUBA1C
Polyamine Regulation in Colon Cancer	0.293	0.0455	NaN	SAT1
Fatty Acid α-oxidation	0.293	0.0455	NaN	PTGS2
PPARα/RXRα Activation	0.291	0.0333	-0.447	SMAD3,MRAS,NFKBIB,ABCA1,PPARA,GPD2
Rac Signaling	0.29	0.0342	2	MRAS,TIAM1,MCF2L,GAB1
Role of Lipids/Lipid Rafts in the Pathogenesis of Influenza	0.28	0.0435	NaN	RSAD2
Putrescine Degradation III	0.28	0.0435	NaN	SAT1
Melanoma Signaling	0.279	0.0364	NaN	MRAS,GAB1
Unfolded protein response	0.279	0.0364	NaN	INSIG1,PPP1R15A
G Beta Gamma Signaling	0.273	0.0341	NaN	GNAI1,GNG4,MRAS
NGF Signaling	0.268	0.0331	NaN	MAPK12,MRAS,GAB1,TRAF4
Role of JAK1, JAK2 and TYK2 in Interferon Signaling	0.268	0.0417	NaN	STAT1
Superpathway of D-myo-inositol (1,4,5)-trisphosphate Metabolism	0.268	0.0417	NaN	ITPKC
Tryptophan Degradation III (Eukaryotic)	0.268	0.0417	NaN	IDO1
Chondroitin Sulfate Biosynthesis	0.264	0.0351	NaN	HS3ST1,CHST15
Glutamate Receptor Signaling	0.264	0.0351	NaN	GLUL,SLC38A1
Synaptic Long Term Potentiation	0.263	0.0328	1	PPP1R3C,MRAS,ITPR1,PPP3CC
Role of NANOG in Mammalian Embryonic Stem Cell Pluripotency	0.263	0.0328	NaN	MRAS,LIF,GAB1,FZD4
PDGF Signaling	0.261	0.0333	NaN	STAT1,MRAS,GAB1
Bupropion Degradation	0.256	0.04	NaN	CYP3A4
Ethanol Degradation IV	0.256	0.04	NaN	GPX7
OX40 Signaling Pathway	0.255	0.033	NaN	TNFSF4,MAPK12,NFKBIB
Dermatan Sulfate Biosynthesis	0.249	0.0339	NaN	HS3ST1,CHST15
Glycolysis I	0.245	0.0385	NaN	FBP2
Gluconeogenesis I	0.245	0.0385	NaN	FBP2
PCP pathway	0.235	0.0328	NaN	MAPK12,FZD4
Superpathway of Cholesterol Biosynthesis	0.225	0.0357	NaN	HMGCR
Acetone Degradation I (to Methylglyoxal)	0.216	0.0345	NaN	CYP3A4
ID	Molecules in Network	Score	Focus Molecules	Top Diseases and Functions
1	APC (complex),CFB,CHI3L1,DENND2D,Foxp1,FRMD6,GJB2,HOPX,Ifn gamma,IL18BP,ISG20,KIAA1671,LOXL2,MMR,MSC,MTCL1,PECAM1,Plk,PLK2,PLK3,PMP22,RASSF3,RASSF4,RASSF8,RNF125,S100A2,SLC39A14,STAT1/3/5 dimer,THBD,Timp,TINAGL1,TMEM158,TNFAIP2,Vegf,WDR7	39	28	Cardiovascular Disease, Cell Death and Survival, Connective Tissue Disorders
2	2' 5' oas,ATP1A1,Calcineurin A,CARHSP1,CCK,Ck2,DOT1L,DUSP1,DUSP2,DUSP5,FBXL2,FSH,KCTD12,Lh,MAMLD1,Mir122a,b,MS4A3,NPC2,NUDT9,phosphatase,PISD,PPP1R13B,PTPN1,PTPN13,PTPN23,RNF19B,ROS1,SLAMF8,SORBS3,SRC (family),STAT1,TMEM26,TNS3,Wfdc21,YBX3	37	27	Post-Translational Modification, Digestive System Development and Function, Cell Cycle
3	ARL11,ARL8B,C9orf72,CACHD1,GAL,GIMAP4,HUNK,ID2,IFRD1,Iga,IgG,IL9,IL12 (family),IL23A,IL2RA,IL7R,Immunoglobulin,LIF,MHC II,MICAL2,MXI1,NMI,PIM1,Ppp2c,PTTG1,RAB19,Rsk,Secretase gamma,SELENBP1,SLAMF1,SPINT1,STAT5A,TM4SF1,TOX,VASN	37	27	Cellular Development, Cellular Growth and Proliferation, Hematological System Development and Function
4	ABTB2,Bvr,CARS,CBR3,CD80/CD86,CHI3L2,CRISPLD2,DCSTAMP,DPH5,GBP6,Gpd,GPD2,HLA-DQ,HLA-DR group,HS1BP3,IL36G,KIF3C,LRRC8B,LRRC8C,MARCH1,MFHAS1,MLKL,MPC1,NFkB (family),NfkB-RelA,NfkB1-RelA,NR6A1,NT5DC3,peptidase,PLAGL2,prostaglandin-E synthase,RHOV,SPNS1,TNF,ZFAND5	32	25	Cell Death and Survival, Organismal Injury and Abnormalities, Molecular Transport
5	ARID5A,ATP6AP2,ATP6V0D1,ATP6V1B2,ATP6V1G1,BBS2,BBS10,BHLHE40,DTX2,EGLN,EPAS1,FNIP2,Gsk3,HEBP2,IFIH1,IFIT2,IFN alpha/beta,Ifnar,IL12 (complex),ISGF3,LAMTOR5,MHC Class I (complex),MTORC1,NFIL3,OLFM4,PTGES2,RBPMS,RRAGC,RRAGD,RSAD2,SNX25,SPECC1,Stat1-Stat2,Vacuolar H+ ATPase,ZBTB12	32	25	Infectious Diseases, Developmental Disorder, Hereditary Disorder
6	ADAMTS4,ADAMTS5,AGMAT,Ap1,CCL5,CHST15,CYP,CYP27B1,DNAH17,EVPL,Fibrin,Fibrinogen,Hedgehog,IL1,IL17A,ITGAV,ITGB3,KLF4,LPGAT1,MET,Metalloprotease,Mmp,OSM,PLEKHA5,PPIF,Pro-inflammatory Cytokine,S100A13,SDC1,SDC4,SLC39A8,STX4,STXBP6,TIMP1,Wnt,ZBTB43	32	25	Cellular Movement, Connective Tissue Disorders, Inflammatory Disease
7	ABHD2,AFF1,Alpha tubulin,ANKRD28,caspase,CD164,DPP7,EAF1,estrogen receptor,FABP5,FOXK1,G0S2,GRASP,Growth hormone,HMOX2,HSD17B11,HSP,Hsp90,HSPB1,Insulin,mediator,MHC Class II (complex),NR3C1,P-TEFb,PPARA,PRNP,SDS,SERPINB9,SLC38A1,TCF19,THRA,TLE3,TRPV2,TUBA1C,WHRN	32	25	Connective Tissue Development and Function, Cellular Assembly and Organization, Cellular Function and Maintenance
8	ACKR3,ALAS1,CCDC86,CCR7,CD3,CD109,chemokine,CSF2,CXCL2,CXCL10,Endothelin,FBL,GNRH,GTF2H1,HIRIP3,Histone h3,IKK (complex),JADE3,LGALS3,LPAR1,MECP2,NFKBIB,Pdgfr,PLC,PXR ligand-PXR-Retinoic acid-RXRα,Relaxin,RRP9,S1PR1,SH2D4A,STAT,TESC,TMEM120B,USHBP1,ZDHHC18,ZNF239	30	24	Neurological Disease, Organismal Injury and Abnormalities, Cellular Movement
9	ALT,ARAP2,CCL4,CCL8,CCL22,CCL3L3,CD274,CISH,CSF3,CSF2 receptor,CSF2RB,Eotaxin,Fcer,Gm-csf,GOT,HLA-DR,Ige,IL7,IL10,IL33,IL12B,IL7R (complex),Interferon-α Induced,LTA,NUB1,P2RX5,PELI1,RUBCN,RUBCNL,SCARA5,SCAVENGER receptor CLASS A,SOCS3,TH1 Cytokine,TNIP3,UBD	28	23	Cellular Movement, Immune Cell Trafficking, Hematological System Development and Function
10	26s Proteasome,ARHGEF16,ATIC,Calmodulin,CD83,DUB,ENaC,EPB41L2,HEXA,Hsp27,Hsp70,IFIT3,IFN Beta,IFN type 1,Interferon alpha,IRF1,IRF4,ISG15,KCNQ5,MHC CLASS I (family),MST1R,MYLIP,NEDD4L,RNA polymerase II,SFN,SGK1,SMARCA1,TARS,TCEAL1,TRIM25,UBE2S,Ubiquitin,USP2,WFS1,YPEL2	28	23	Cell Cycle, Cancer, Hematological Disease
11	Alp,AMPK,ATF3,BCAS1,BIRC3,Cg,Collagen type IV,Creb,Eif2,GAB1,GDA,GDNF,GJA5,GLUL,IER3,Laminin (complex),Mek,MLLT6,NOS2,p85 (pik3r),PARP,PARP3,PDGF BB,Pkg,PPA1,PPP1R15A,PTGS2,RUNX2,SAT1,SEMA7A,STEAP1,TBC1D1,TCAF1,Tnf (family),TRIB3	27	22	Cell Death and Survival, Organismal Injury and Abnormalities, Cellular Development
12	A4GALT,Adaptor protein 1,B4GALT5,B4GALT6,Cr3,DGAT2,EBI3,EMILIN2,ENC1,ERK1/2,EXT1,GRK4,IFNGR,IL27,Il12 receptor,IL12R,IL12RB2,IL27RA,JAK,MIR320,NEU1,P2RY8,P2y Receptor,SNX5,SOCS,STAT4,Stat1 dimer,Stat3-Stat3,TBX21,TLR7/8,TRIM2,ULBP3,WSX1-gp130,ZHX2,ZNF300	25	21	Cell Morphology, Cell-mediated Immune Response, Cellular Development
13	ABCB5,Actin,Aldose Reductase,Alpha Actinin,Alpha catenin,AMPD1,ATPase,Cadherin,Casein,CDC42EP2,CDH23,Cofilin,CTTN,CYP3A4,DDX25,DENND3,DQX1,EZR,F Actin,Ferritin,ICAM1,Myosin,P glycoprotein,PARVB,PHACTR1,PLEKHM2,RAB9A,RHOH,Rock,STEAP2,TFPI2,TLR2/3/4/9,TMEM231,UGCG,VAT1	25	21	Cell Morphology, Cellular Assembly and Organization, Cellular Function and Maintenance
14	ADAM9,Akt,ARHGEF3,BID,BOC,c-Src,Caspase 8/10,CDON,CFLAR,Collagen type VI,death receptor,ESM1,FADD,FERMT2,Fgfr,Filamin,Foxo,Integrin,Integrinα,Integrinβ,ITGA9,ITGB8,Lfa-1,NMB,NRP2,NYAP2,Pde4,SIGMAR1,STARD8,Talin,TNFRSF21,TNFRSF25,TNFSF15,Ube3,VEGFB	23	20	Organismal Injury and Abnormalities, Cardiovascular System Development and Function, Embryonic Development
15	ADA,ARHGAP35,CAMK2N1,CD48,elastase,ENPP4,ERK,Erm,ETS,Gap,Laminin1,LGALS8,MAFF,MAPK12,Oas,p38 Sapk,Pak,Pde,PDE10A,PDE1B,PDE7A,Pka catalytic subunit,Pki,PKIG,PLXNA1,PRKX,Proinsulin,Rho gdi,RHOC,RND1,SLC22A23,SPSB1,TBC1D4,THEMIS2,TMSB4	23	20	Cardiovascular Disease, Neurological Disease, Organismal Injury and Abnormalities
16	3 beta HSD,CDCP1,Collagen type III,Collagen(s),Cpla2,CPM,CSF,CSF1,ETV3,F11R,Fgf,GC-GCR dimer,HERC6,HSD11B1,HSD3B7,IL1RN,KLF15,lysophospholipase,MGLL,MYBL2,P38 MAPK,Pdgf (complex),PEPCK,phospholipase A1,PLA2,PLA2G15,PLA2G4A,PLA2G4D,PLA2G4F,PPP2R3C,PRDX6,PSAT1,STAM,TH17 Cytokine,tubulin (family)	23	20	Lipid Metabolism, Small Molecule Biochemistry, Skeletal and Muscular System Development and Function
17	ABCC5,AGRN,C3orf62,CCDC134,CHTF8,CLCN6,CNDP2,CYB5B,DAGLA,FAM111B,FAM83G,IRF2BP2,KANK1,MICALCL,MOV10,NUPR1,OSER1,RAB32,RAB1B,RCL1,RELL1,RFX5,RILPL2,RUSC2,SEC11A,SIGMAR1,SPTSSA,TANC1,TCAF2,TMBIM1,TNS3,TOMM40L,TRIM16,UPRT,ZMYM3	21	19	Cancer, Hematological Disease, Immunological Disease
18	ADCY,ADGRE3,ADGRF1,ADGRF5,ARL5B,C-C chemokine receptor,Clathrin,FZD4,G protein,G protein alpha,G protein alphai,G protein beta gamma,G-protein beta,GNAI1,GNG4,Gpcr,GPR68,GPR146,GPR160,GPRC5A,Gs-coupled receptor,HCAR3,HRH1,LTB4R,P110,P2RY6,Pik3r,PTGIR,Ras homolog,RHOB,S1PR5,Sfk,Shc,Trk Receptor,tubulin	20	18	Cell Signaling, Lipid Metabolism, Molecular Transport
19	ABCA9,ADAT1,ANKRD40,ANKRD33B,C15orf59,C20orf96,CAMKMT,CCNI,CFAP45,CPM,DEDD,EIF4E3,ELAVL1,FAM102B,FAM105A,FAM71A,FLVCR2,FLYWCH2,GK2,GK5,HSPA8,LDLRAD3,LPGAT1,MESDC1,MXRA7,NXF1,PPP1CC,RAB2B,RBM47,RWDD4,SLC38A6,SPIN4,TM4SF1,TWISTNB,ZNF23	20	18	Cardiovascular Disease, Developmental Disorder, Neurological Disease
20	CRLF2,Delta/Jagged,DLL1,DLL4,Dynamin,EFNB2,FLT3,GBP2,GBP5,IL23,IL-2R,JAG1,JAK1/2,LTBP2,MEF2,METTL13,mGluR,NCK,NEURL2,Notch,PI3K (complex),PI3K p85,SDC3,SH3BP4,SH3PXD2B,SOAT1,sphingomyelinase,STAT3/5,STAT5a/b,SYK/ZAP,Syndecan,TLR2/TLR4,TNFAIP8L3,TRP,TRPC6	18	17	Cellular Development, Cellular Growth and Proliferation, Embryonic Development
21	ABCA1,ATP8A1,ATP8B1,C1q,CCL2,creatine kinase,CYP27A1,HDL,HDL-cholesterol,hemoglobin,HMGCR,INTERLEUKIN,Iti,ITIH4,LDL,LDL-cholesterol,MAP1LC3,MEGF10,Mg2+-ATPase,MTORC2,NOCT,NPC1,OSBPL8,PI3K (family),PRKAA,PTX3,RNF128,SAA,SAA1,Srebp,TMPRSS6,TNFAIP6,TRPM6,VLDL,VLDL-cholesterol	18	17	Lipid Metabolism, Molecular Transport, Small Molecule Biochemistry
22	AChR,AGRN,BAMBI,beta-glucuronidase,BMP,Cbp/p300,CDA,COL27A1,collagen,Collagen Alpha1,Ecm,EDN1,EID2,Focal adhesion kinase,GEM,GUSB,HPSE,IGFBP3,Importin alpha,INHBA,INO80E,JINK1/2,MCF2L,Mlc,MRC1,RAB38,Rar,S1PR,Serine Protease,Smad,SMAD3,Smad2/3,Tgf beta,TGM2,thyroid hormone receptor	18	17	Endocrine System Development and Function, Lipid Metabolism, Molecular Transport
23	AGFG2,APP,BTD,C3orf20,CCND1,CHST2,CHST7,COL27A1,DNASE1L3,GSDMB,GTDC1,HABP2,HS3ST1,ITM2C,LSMEM1,LSMEM2,MARCH3,OLFML2A,Plpp1,PRSS23,PRSS33,PRUNE2,RAPGEFL1,RCN3,RMI2,SLAMF7,SLCO2B1,STOML3,STX1B,TMEM261,TNF,TST,U1 snRNP,UTP11,ZNF365	18	17	Cellular Assembly and Organization, Cell Death and Survival, Cellular Compromise
24	ADCY7,BFAR,CCDC150,CDC42EP2,CFAP161,CHUK,CLDN8,CLIC3,CRIM1,CUEDC2,DRAM1,ESR1,FAM102A,FAM92A,FXYD6,HIST1H2BI,HPGDS,Krt10,LAPTM5,LAPTM4A,LILRB5,Mapre2,N4BP1,PDP2,PSAT1,PTX3,RAD50,RAD51C,RENBP,RIPOR3,RNF38,TMEM176B,TNFAIP2,TP73,UBC	18	17	Dermatological Diseases and Conditions, Organ Morphology, Organismal Injury and Abnormalities
25	Alpha 1 antitrypsin,amylase,arginase,beta-galactosidase,calpain,Caspase 3/7,Cathepsin,CD33,chymotrypsin,Ciap,CLDN4,Collagen type I,Collagen type II,CREB3L1,CTSA,CTSB,CTSK,CTSL,CTSZ,cyclooxygenase,ECE1,GLB1L3,GPIIB-IIIA,Integrin alpha V beta 3,KCNJ2,LCT,MLPH,Mucin,Nos,NTN1,Pkc(s),Ryr,SCIN,SLC20A2,trypsin	16	16	Post-Translational Modification, Protein Degradation, Protein Synthesis
Categories	Diseases or Functions Annotation	p-Value	Predicted Activation State	Activation z-score	Flags	Molecules	# Molecules
Hematological System Development and Function, Tissue Morphology	Quantity of leukocytes	1.54e-40	Increased	4.606	bias	ABCA1,ACKR3,ADA,AFF1,ARID5A,ATF3,ATP6AP2,BACH2,BATF,BATF3,BHLHE40,BID,BIRC3,BLNK,CBLB,CBR3,CCL2,CCL20,CCL22,CCL3L3,CCL4,CCL5,CCR7,CD274,CD48,CD83,CDK6,CFLAR,CHI3L1,CISH,CRLF2,CSF1,CSF2,CSF2RB,CSF3,CTSB,CXCL10,CXCL2,CYP27A1,CYP27B1,DLL1,DLL4,DUSP1,DUSP5,EBI3,EFNB2,EZH2,FABP5,FADD,FLT3,Foxp1,GAB2,GADD45A,GADD45B,GADD45G,GPR68,HEXB,HPSE,HRH1,HSD11B1,ICAM1,ID2,IDO1,IGFBP3,IL10,IL12B,IL12RB2,IL17A,IL1…	144
Hematological System Development and Function, Tissue Morphology	Quantity of blood cells	2.33e-37	Increased	4.836	bias	ABCA1,ACKR3,ADA,AFF1,ARID5A,ATF3,ATP6AP2,BACH2,BATF,BATF3,BHLHE40,BID,BIRC3,BLNK,CBLB,CBR3,CCL2,CCL20,CCL22,CCL3L3,CCL4,CCL5,CCR7,CD274,CD48,CD83,CD9,CDK6,CFLAR,CHI3L1,CISH,CRLF2,CSF1,CSF2,CSF2RB,CSF3,CTSB,CXCL10,CXCL2,CYP27A1,CYP27B1,DLL1,DLL4,DUSP1,DUSP5,EBI3,EFNB2,EPAS1,EZH2,FABP5,FADD,FLT3,Foxp1,GAB2,GADD45A,GADD45B,GADD45G,GPR68,HEXB,HPSE,HRH1,HSD11B1,ICAM1,ID2,IDO1,IGFBP3,IL10,IL12B,IL12RB2…	149
Hematological System Development and Function, Tissue Morphology	Quantity of mononuclear leukocytes	1.01e-33	Increased	4.699	bias	ACKR3,ADA,AFF1,ARID5A,ATP6AP2,BACH2,BATF,BATF3,BHLHE40,BID,BLNK,CBLB,CCL2,CCL4,CCL5,CCR7,CD274,CD48,CD83,CDK6,CFLAR,CHI3L1,CISH,CRLF2,CSF1,CSF2,CSF2RB,CSF3,CTSB,CXCL10,CYP27A1,CYP27B1,DLL1,DLL4,DUSP5,EBI3,EFNB2,FABP5,FADD,FLT3,Foxp1,GADD45A,GADD45B,GADD45G,GPR68,HEXB,HRH1,ICAM1,ID2,IGFBP3,IL10,IL12B,IL12RB2,IL17A,IL23A,IL27,IL27RA,IL2RA,IL33,IL7,IL7R,IL9,INHBA,IRF1,IRF4,ISG15,ITGB3,ITGB8,KLF4,LAT…	118
Hematological System Development and Function, Lymphoid Tissue Structure and Development, Tissue Morphology	Quantity of lymphocytes	7.98e-33	Increased	4.875	bias	ACKR3,ADA,AFF1,ARID5A,ATP6AP2,BACH2,BATF,BATF3,BHLHE40,BID,BLNK,CBLB,CCL2,CCL4,CCL5,CCR7,CD274,CD48,CD83,CDK6,CFLAR,CHI3L1,CISH,CRLF2,CSF1,CSF2,CSF2RB,CSF3,CTSB,CXCL10,CYP27A1,CYP27B1,DLL1,DLL4,DUSP5,EBI3,EFNB2,FABP5,FADD,FLT3,Foxp1,GADD45A,GADD45B,GADD45G,HEXB,HRH1,ICAM1,ID2,IGFBP3,IL10,IL12B,IL12RB2,IL17A,IL23A,IL27,IL27RA,IL2RA,IL33,IL7,IL7R,IL9,INHBA,IRF1,IRF4,ISG15,ITGB8,KLF4,LAT,LGALS3,LGAL…	114
Hematological System Development and Function, Lymphoid Tissue Structure and Development, Tissue Morphology	Quantity of T lymphocytes	1.37e-31	Increased	4.018	bias	ADA,AFF1,ARID5A,ATP6AP2,BACH2,BATF,BATF3,BHLHE40,CBLB,CCL4,CCL5,CCR7,CD274,CD48,CD83,CDK6,CFLAR,CHI3L1,CISH,CRLF2,CSF1,CSF2,CSF2RB,CSF3,CXCL10,CYP27A1,CYP27B1,DLL4,DUSP5,EBI3,EFNB2,FABP5,FADD,FLT3,GADD45A,GADD45B,GADD45G,HEXB,HRH1,ICAM1,ID2,IL10,IL12B,IL12RB2,IL17A,IL23A,IL27,IL27RA,IL2RA,IL33,IL7,IL7R,IL9,IRF1,IRF4,ITGB8,KLF4,LAT,LGALS8,LIF,LTA,MARCH1,MYBL2,NFIL3,NFKBIB,NOD2,NOS2,NR3C1,OSM,P2RX5…	95
Lymphoid Tissue Structure and Development, Tissue Morphology	Quantity of lymphatic system cells	1.7e-31	Increased	5.22	bias	ACKR3,ADA,AFF1,ARID5A,ATP6AP2,BACH2,BATF,BATF3,BHLHE40,BID,BLNK,CBLB,CCL2,CCL4,CCL5,CCR7,CD274,CD48,CD83,CD9,CDK6,CFLAR,CHI3L1,CISH,CRLF2,CSF1,CSF2,CSF2RB,CSF3,CTSB,CXCL10,CYP27A1,CYP27B1,DLL1,DLL4,DUSP5,EBI3,EFNB2,FABP5,FADD,FLT3,Foxp1,GAB2,GADD45A,GADD45B,GADD45G,HEXB,HRH1,ICAM1,ID2,IGFBP3,IL10,IL12B,IL12RB2,IL17A,IL23A,IL27,IL27RA,IL2RA,IL33,IL7,IL7R,IL9,INHBA,IRF1,IRF4,ISG15,ITGB8,KLF4,LAT,LG…	117
Cellular Function and Maintenance	Function of leukocytes	5.64e-31		1.356	bias	ADA,ATF3,BACH2,BATF3,BHLHE40,BIRC3,CBLB,CCL2,CCL5,CCR7,CD274,CD9,CHI3L1,CSF1,CSF2,CSF2RB,CSF3,CTSZ,CXCL10,DUSP1,DUSP2,DUSP4,DUSP5,EBI3,F11R,GAB2,GADD45B,GADD45G,GIMAP4,GPR68,HSPB1,ICAM1,IDO1,IFIH1,IL10,IL12B,IL12RB2,IL23A,IL27,IL27RA,IL2RA,IL33,IL7,IL9,IRF1,ITGB3,LAT,LGALS3,LTA,LTB4R,MST1R,NFKBIZ,NOD2,NOS2,NPC2,P2RY6,PECAM1,PIM1,PLA2G15,PLA2G4A,PLXNA1,PNP,PTGS2,PTPN13,RGS16,RNF128,S1PR1,SERPINB9,…	87
Cellular Movement	Cell movement	1.44e-29	Increased	5.988	bias	ABCA1,ABHD2,ACKR3,ACSL4,ADA,ADAM9,ADGRF5,ANKRD28,ARHGAP35,ARHGEF16,ATF3,ATP8A1,BACH2,BATF,BHLHE40,BID,CBLB,CCK,CCL2,CCL20,CCL22,CCL3L3,CCL4,CCL5,CCL8,CCR7,CD274,CD48,CD9,CDCP1,CDK6,CELF3,CEMIP,CFB,CHI3L1,CLDN4,CNDP2,CREB3L1,CSF1,CSF2,CSF2RB,CSF3,CTSB,CTSL,CTSZ,CTTN,CXCL10,CXCL2,DLL1,DLL4,DRAM1,DUSP1,DUSP4,DUSP5,EBI3,EDN1,EFNB2,EHF,EMILIN2,EPAS1,EZH2,EZR,F11R,FABP5,FADD,FBXL2,FERMT2,FRMD6,FZD4,GAB…	220
Cellular Movement	Migration of cells	2.07e-29	Increased	5.787	bias	ABCA1,ABHD2,ACKR3,ACSL4,ADA,ADAM9,ADGRF5,ANKRD28,ARHGAP35,ARHGEF16,ATF3,ATP8A1,BACH2,BATF,BHLHE40,BID,CBLB,CCK,CCL2,CCL20,CCL22,CCL3L3,CCL4,CCL5,CCL8,CCR7,CD274,CD48,CD9,CDCP1,CDK6,CEMIP,CFB,CHI3L1,CLDN4,CNDP2,CREB3L1,CSF1,CSF2,CSF2RB,CSF3,CTSB,CTSL,CTSZ,CTTN,CXCL10,CXCL2,DLL4,DUSP1,DUSP4,DUSP5,EBI3,EDN1,EFNB2,EHF,EMILIN2,EPAS1,EZH2,EZR,F11R,FABP5,FBXL2,FRMD6,FZD4,GAB1,GAB2,GADD45A,GDNF,GJB2,GNAI…	203
Cellular Function and Maintenance	Function of blood cells	2.36e-29		1.499	bias	ABCA1,ADA,ATF3,BACH2,BATF3,BHLHE40,BIRC3,CBLB,CCL2,CCL5,CCR7,CD274,CD9,CHI3L1,CSF1,CSF2,CSF2RB,CSF3,CTSZ,CXCL10,DUSP1,DUSP2,DUSP4,DUSP5,EBI3,F11R,GAB2,GADD45B,GADD45G,GIMAP4,GPR68,HSPB1,ICAM1,IDO1,IFIH1,IL10,IL12B,IL12RB2,IL23A,IL27,IL27RA,IL2RA,IL33,IL7,IL9,IRF1,ITGB3,LAT,LGALS3,LTA,LTB4R,MST1R,NFKBIZ,NOD2,NOS2,NPC2,P2RY6,PECAM1,PIM1,PLA2G15,PLA2G4A,PLXNA1,PNP,PTGIR,PTGS2,PTPN13,RGS16,RNF128,S1P…	90
Cell Death and Survival	Cell death	1.9e-28		1.401		A4GALT,ABCA1,ACKR3,ACSL4,ADA,AFF1,AGAP3,AGO2,AGRN,ARG2,ARHGAP35,ARHGEF3,ARL11,ARL8B,ATF3,ATP1A1,ATP6AP2,ATP8B1,B4GALT5,BACH2,BATF3,BBS10,BBS2,BFAR,BHLHE40,BID,BIRC3,BLNK,CBLB,CCDC86,CCK,CCL2,CCL3L3,CCL4,CCL5,CCR7,CD164,CD274,CD33,CD48,CD9,CDA,CDCP1,CDK6,CDON,CFB,CFLAR,CHI3L1,CISH,CLDN4,CNTFR,CREB3L1,CSF1,CSF2,CSF2RB,CSF3,CTSB,CTSL,CTSZ,CTTN,CXCL10,CXCL2,CYP3A4,DDX25,DLL1,DLL4,DOT1L,DPH5,DPP7,DRAM…	290
Cell Death and Survival	Apoptosis	3.85e-28		-0.164		A4GALT,ABCA1,ACSL4,ADA,AGO2,AGRN,ARG2,ARHGAP35,ARHGEF3,ARL11,ATF3,ATP1A1,ATP6AP2,B4GALT5,BACH2,BBS10,BBS2,BFAR,BHLHE40,BID,BIRC3,BLNK,CBLB,CCDC86,CCK,CCL2,CCL3L3,CCL4,CCL5,CCR7,CD164,CD274,CD33,CD48,CD9,CDCP1,CDK6,CDON,CFLAR,CHI3L1,CNTFR,CSF1,CSF2,CSF2RB,CSF3,CTSB,CTSL,CTSZ,CTTN,CXCL10,CXCL2,CYP3A4,DDX25,DLL1,DLL4,DOT1L,DPH5,DPP7,DRAM1,DUSP1,DUSP2,DUSP4,DUSP5,ECE1,EDN1,EFNB2,EHF,EMILIN2,ENC1,EPAS…	243
Cellular Growth and Proliferation, Lymphoid Tissue Structure and Development	Proliferation of lymphatic system cells	5.9e-28	Increased	3.124	bias	ADA,BACH2,BATF,BHLHE40,BIRC3,BLNK,CBLB,CCL2,CCL20,CCL22,CCL4,CCL5,CCR7,CD274,CD33,CD48,CD83,CDK6,CFLAR,CHI3L1,CISH,CRLF2,CSF1,CSF2,CSF2RB,CSF3,CTSZ,CXCL10,DLL4,DUSP1,DUSP5,EBI3,EDN1,EFNB2,EZR,FADD,FLT3,Foxp1,GAB2,GADD45A,GADD45B,GAL,HRH1,ICAM1,ID2,IDO1,IGFBP3,IL10,IL12B,IL12RB2,IL17A,IL1RN,IL23A,IL27,IL27RA,IL2RA,IL33,IL7,IL7R,IL9,INHBA,IRF1,IRF4,ISG15,ISG20,ITGB3,JAG1,KLF4,LAPTM5,LAT,LGALS3,LIF,…	113
Tissue Morphology	Quantity of cells	8.85e-28	Increased	5.823	bias	ABCA1,ACKR3,ADA,ADAM9,ADAMTS4,ADGRF5,AFF1,AGRN,ARID5A,ATF3,ATP6AP2,BACH2,BATF,BATF3,BHLHE40,BID,BIRC3,BLNK,BOC,CBLB,CBR3,CCK,CCL2,CCL20,CCL22,CCL3L3,CCL4,CCL5,CCR7,CD274,CD48,CD83,CD9,CDK6,CFLAR,CHI3L1,CISH,CNTFR,CREB3L1,CRLF2,CSF1,CSF2,CSF2RB,CSF3,CTSB,CTSK,CXCL10,CXCL2,CYP27A1,CYP27B1,DLL1,DLL4,DOT1L,DUSP1,DUSP4,DUSP5,EBI3,EDN1,EFNB2,EPAS1,EZH2,FABP5,FADD,FADS2,FLT3,Foxp1,GAB2,GADD45A,GADD45B,G…	188
Cellular Movement, Hematological System Development and Function, Immune Cell Trafficking	Cell movement of leukocytes	4.73e-27	Increased	3.97	bias	ABCA1,ACKR3,ADA,BACH2,BATF,BID,CBLB,CCL2,CCL20,CCL22,CCL3L3,CCL4,CCL5,CCL8,CCR7,CD274,CD48,CD9,CFB,CSF1,CSF2,CSF3,CTSB,CTSZ,CTTN,CXCL10,CXCL2,DUSP1,EDN1,EFNB2,EPAS1,EZR,F11R,FABP5,GJB2,HPSE,HRH1,HSPB1,ICAM1,IDO1,IGFBP3,IL10,IL12B,IL17A,IL18BP,IL1RN,IL23A,IL27RA,IL2RA,IL33,IL7,IL7R,IL9,INHBA,ITGA9,ITGAV,ITGB3,LAT,LGALS3,LTA,LTB4R,MAPK12,NFIL3,NFKBIZ,NOD2,NOS2,NPC1,NR3C1,NRP2,NTN1,OLFM4,OSM,P2RY6,P…	111
Cellular Development, Cellular Growth and Proliferation	Proliferation of blood cells	1.34e-26	Increased	3.514	bias	ADA,AGRN,BACH2,BATF,BHLHE40,BIRC3,BLNK,CBLB,CCL2,CCL20,CCL22,CCL3L3,CCL4,CCL5,CCR7,CD274,CD33,CD48,CD83,CDK6,CFLAR,CISH,CRLF2,CSF1,CSF2,CSF2RB,CSF3,CTSZ,CXCL10,CXCL2,DLL1,DLL4,DUSP1,DUSP5,EBI3,EFNB2,EPAS1,EZH2,EZR,FADD,FLT3,Foxp1,GAB2,GADD45A,GADD45B,GAL,HRH1,ICAM1,ID2,IDO1,IL10,IL12B,IL12RB2,IL17A,IL1RN,IL23A,IL27,IL27RA,IL2RA,IL33,IL7,IL7R,IL9,INHBA,IRF1,IRF4,ISG15,ISG20,ITGB3,JAG1,KLF4,LAPTM5,…	116
Cellular Development, Cellular Growth and Proliferation, Hematological System Development and Function, Lymphoid Tissue Structure and Development	Proliferation of immune cells	2.92e-26	Increased	3.336		ADA,BACH2,BATF,BHLHE40,BIRC3,BLNK,CBLB,CCL2,CCL22,CCL4,CCL5,CCR7,CD274,CD33,CD48,CD83,CDK6,CFLAR,CISH,CRLF2,CSF1,CSF2,CSF2RB,CSF3,CTSZ,CXCL2,DLL4,DUSP1,DUSP5,EBI3,EFNB2,EZR,FADD,FLT3,Foxp1,GAB2,GADD45A,GADD45B,GAL,HRH1,ICAM1,ID2,IDO1,IL10,IL12B,IL12RB2,IL17A,IL1RN,IL23A,IL27,IL27RA,IL2RA,IL33,IL7,IL7R,IL9,INHBA,IRF1,IRF4,ISG15,ISG20,ITGB3,JAG1,KLF4,LAPTM5,LAT,LGALS3,LTA,MET,MRAS,MXI1,MYBL1,NFIL3,…	108
Cellular Development, Cellular Growth and Proliferation, Hematological System Development and Function, Lymphoid Tissue Structure and Development	Proliferation of mononuclear leukocytes	3.59e-26	Increased	3.088		ADA,BACH2,BATF,BHLHE40,BIRC3,BLNK,CBLB,CCL2,CCL22,CCL4,CCL5,CCR7,CD274,CD33,CD48,CD83,CDK6,CFLAR,CISH,CRLF2,CSF1,CSF2,CSF2RB,CSF3,CTSZ,CXCL2,DLL4,DUSP1,DUSP5,EBI3,EFNB2,EZR,FADD,FLT3,Foxp1,GAB2,GADD45A,GADD45B,GAL,HRH1,ICAM1,ID2,IDO1,IL10,IL12B,IL12RB2,IL17A,IL1RN,IL23A,IL27,IL27RA,IL2RA,IL33,IL7,IL7R,IL9,INHBA,IRF1,IRF4,ISG15,ISG20,ITGB3,JAG1,KLF4,LAPTM5,LAT,LGALS3,LTA,MXI1,MYBL1,NFIL3,NOS2,NPC1…	105
Inflammatory Response	Inflammatory response	5e-26	Increased	4.391	bias	ACKR3,ADA,ADGRF5,ATF3,BID,BIRC3,BLNK,CCL2,CCL20,CCL22,CCL3L3,CCL4,CCL5,CCL8,CCR7,CD9,CHI3L1,CRLF2,CSF1,CSF2,CSF3,CTSB,CXCL10,CXCL2,EDN1,EPAS1,F11R,GADD45A,GAL,GDNF,GPR68,HPSE,HRH1,HSPB1,ICAM1,IDO1,IER3,IL10,IL12B,IL17A,IL19,IL1RN,IL23A,IL27,IL2RA,IL33,IL7,IL9,INHBA,ISG15,ITGA9,ITGAV,ITGB3,KLF4,LAT,LGALS3,LIF,LOXL2,LOXL3,LTA,LTB4R,MGLL,MST1R,NFIL3,NFKBIB,NFKBIZ,NMI,NOD2,NOS2,NPC1,NR3C1,NRP2,NTN1,N…	109
Cellular Development, Cellular Growth and Proliferation, Hematological System Development and Function, Hematopoiesis, Lymphoid Tissue Structure and Development, Tissue Development	Leukopoiesis	5.06e-26	Increased	5.688	bias	ABCA1,ADA,AFF1,BACH2,BATF,BATF3,BHLHE40,BLNK,CBLB,CCL2,CCL5,CCR7,CD274,CD83,CD9,CDK6,CFLAR,CISH,CRLF2,CSF1,CSF2,CSF2RB,CSF3,CXCL10,DCSTAMP,DLL1,DLL4,DUSP5,EFNB2,EZH2,EZR,FADD,FLT3,Foxp1,GAB2,GADD45A,GADD45B,GADD45G,GIMAP4,GPR68,HRH1,HS1BP3,ICAM1,ID2,IFRD1,IL10,IL12B,IL12RB2,IL17A,IL1RN,IL23A,IL27,IL27RA,IL2RA,IL33,IL7,IL7R,IL9,INHBA,IRF1,IRF4,ITGB3,ITGB8,ITPKC,JAG1,KLF4,LAT,LGALS3,LGALS8,LIF,LTA,…	111
Cellular Function and Maintenance	Cellular homeostasis	6.9e-26	Increased	5.746	bias	A4GALT,ABCA1,ABCB5,ADA,ADGRF5,AFF1,ARHGAP35,ATP1A1,ATP6V0D1,ATP6V1B2,ATP6V1G1,BATF,BHLHE40,BID,C9orf72,CBLB,CCK,CCL2,CCL20,CCL22,CCL3L3,CCL4,CCL5,CCL8,CCR7,CD274,CD83,CDK6,CFLAR,CISH,CLDN4,CSF2,CSF2RB,CTSL,CTTN,CXCL10,CXCL2,CYP27B1,DENND3,DLL1,DLL4,DRAM1,DUSP4,EDN1,EFNB2,EPAS1,EZH2,F11R,FADD,FAM20A,FBXL2,FLT3,Foxp1,GAB1,GADD45B,GADD45G,GDNF,GIMAP4,GPD2,HEXB,HRH1,HS1BP3,HSD11B1,HSPB1,ICAM1,ID2,IDO…	171
Inflammatory Response	Inflammation of absolute anatomical region	4.48e-25		-1.171	bias	ABCA1,ADA,AGO2,ARID5A,ATF3,BACH2,BATF,BHLHE40,BID,BIRC3,CBLB,CCL2,CCL20,CCL22,CCL3L3,CCL4,CCL5,CCL8,CCR7,CD274,CD48,CFB,CFLAR,CISH,CRLF2,CSF1,CSF2,CSF2RB,CSF3,CTSB,CTSL,CXCL10,CXCL2,CYP3A4,DLL1,DLL4,DUSP1,EBI3,EDN1,EPAS1,FLT3,GADD45A,GADD45B,GADD45G,GBP2,GDNF,GPX7,HMGCR,HMOX2,HRH1,HSD11B1,ICAM1,ID2,IDO1,IFIH1,IGFBP3,IL10,IL12B,IL12RB2,IL17A,IL18BP,IL1RN,IL23A,IL27,IL27RA,IL2RA,IL33,IL7,IL9,INSIG1…	137
Cellular Movement, Immune Cell Trafficking	Leukocyte migration	4.49e-25	Increased	4.341	bias	ABCA1,ACKR3,ADA,BACH2,BATF,BID,CBLB,CCL2,CCL20,CCL22,CCL3L3,CCL4,CCL5,CCL8,CCR7,CD274,CD48,CD9,CFB,CHI3L1,CSF1,CSF2,CSF2RB,CSF3,CTSB,CTSZ,CTTN,CXCL10,CXCL2,DUSP1,EDN1,EFNB2,EPAS1,EZR,F11R,FABP5,GAB2,GDNF,GJB2,HPSE,HRH1,HSPB1,ICAM1,IDO1,IGFBP3,IL10,IL12B,IL17A,IL18BP,IL1RN,IL23A,IL27RA,IL2RA,IL33,IL7,IL7R,IL9,INHBA,ITGA9,ITGAV,ITGB3,LAT,LGALS3,LIF,LTA,LTB4R,MAPK12,NFIL3,NFKBIZ,NOD2,NOS2,NPC1,NR3C1…	116
Cellular Development, Cellular Growth and Proliferation, Hematological System Development and Function, Lymphoid Tissue Structure and Development	Proliferation of lymphocytes	6.37e-25	Increased	2.685		ADA,BACH2,BATF,BHLHE40,BIRC3,BLNK,CBLB,CCL2,CCL22,CCL4,CCL5,CCR7,CD274,CD33,CD48,CD83,CDK6,CFLAR,CISH,CRLF2,CSF2,CSF2RB,CTSZ,DLL4,DUSP1,DUSP5,EBI3,EFNB2,EZR,FADD,FLT3,Foxp1,GAB2,GADD45A,GADD45B,GAL,HRH1,ICAM1,ID2,IDO1,IL10,IL12B,IL12RB2,IL17A,IL1RN,IL23A,IL27,IL27RA,IL2RA,IL33,IL7,IL7R,IL9,INHBA,IRF1,IRF4,ISG15,ISG20,ITGB3,JAG1,KLF4,LAPTM5,LAT,LGALS3,LTA,MXI1,MYBL1,NFIL3,NOS2,NPC1,PECAM1,PELI1,PI…	102
Cell Death and Survival	Cell death of blood cells	6.74e-25		1.444		ADA,AGRN,ATF3,BID,BIRC3,BLNK,CCDC86,CCL2,CCL3L3,CCL4,CCL5,CCR7,CD274,CD48,CD9,CFLAR,CHI3L1,CISH,CSF1,CSF2,CSF2RB,CSF3,CTSB,CXCL10,CXCL2,DLL1,DLL4,DOT1L,DRAM1,DUSP4,DUSP5,EPAS1,EZR,FADD,FLT3,GAB2,GADD45B,GIMAP4,ICAM1,ID2,IDO1,IER3,IFIH1,IL10,IL17A,IL19,IL1RN,IL27,IL27RA,IL2RA,IL33,IL7,IL7R,IL9,INHBA,IRF1,IRF4,ISG15,ITPR1,KLF4,LAT,LGALS3,LGALS8,MET,MYBL2,NFIL3,NFKBIB,NOS2,NPC1,NR3C1,OSM,PECAM1,PIM1…	98
Inflammatory Response, Organismal Injury and Abnormalities	Inflammation of organ	1.48e-24		-1.104	bias	ABCA1,ADA,AGO2,ARID5A,ATF3,ATP1A1,BACH2,BATF,BHLHE40,BID,BIRC3,CBLB,CCL2,CCL20,CCL22,CCL3L3,CCL4,CCL5,CCL8,CCR7,CD274,CD48,CFB,CFLAR,CISH,CRLF2,CSF1,CSF2,CSF2RB,CSF3,CTSB,CTSL,CXCL10,CXCL2,CYP3A4,DLL1,DLL4,DUSP1,DUSP2,EBI3,EDN1,EPAS1,FABP5,FADS2,FLT3,GADD45A,GADD45B,GADD45G,GBP2,GDNF,GPX7,HMGCR,HMOX2,HRH1,HSD11B1,ICAM1,ID2,IDO1,IFIH1,IGFBP3,IL10,IL12B,IL12RB2,IL17A,IL18BP,IL1RN,IL23A,IL27,IL27RA,…	149
Cellular Function and Maintenance	Function of phagocytes	2.86e-24		1.698	bias	ADA,BATF3,BIRC3,CBLB,CCL2,CCL5,CCR7,CD274,CD9,CHI3L1,CSF1,CSF2,CSF2RB,CSF3,CTSZ,CXCL10,DUSP2,DUSP4,F11R,GAB2,GADD45B,GPR68,HSPB1,ICAM1,IDO1,IFIH1,IL10,IL12B,IL23A,IL27,IL9,IRF1,ITGB3,LAT,LGALS3,LTA,LTB4R,MST1R,NOD2,NOS2,P2RY6,PIM1,PLA2G15,PLA2G4A,PLXNA1,PTGS2,SGMS2,SIGMAR1,SLAMF1,SLAMF8,STAT1,STAT5A,TNF,TRAF4,TRIB3	55
Cell Death and Survival	Apoptosis of blood cells	2.88e-24		-1.285		ADA,AGRN,ATF3,BID,BIRC3,BLNK,CCDC86,CCL2,CCL3L3,CCL4,CCL5,CCR7,CD274,CD9,CFLAR,CHI3L1,CSF1,CSF2,CSF3,CXCL2,DLL1,DLL4,DOT1L,DUSP4,DUSP5,EPAS1,EZR,FADD,FLT3,GADD45B,GIMAP4,ICAM1,IDO1,IER3,IL10,IL17A,IL19,IL1RN,IL27,IL2RA,IL33,IL7,IL7R,IL9,IRF1,IRF4,ISG15,ITPR1,KLF4,LGALS3,LGALS8,MET,MYBL2,NFKBIB,NOS2,NPC1,NR3C1,OSM,PECAM1,PIM1,PLA2G4A,PNP,PPARA,RHOH,S1PR1,SERPINB9,SFN,SMAD3,SOAT1,STAT1,STAT5A,THRA,…	79
Cellular Development, Cellular Growth and Proliferation, Hematological System Development and Function, Hematopoiesis, Lymphoid Tissue Structure and Development, Tissue Development	Differentiation of mononuclear leukocytes	3.06e-24	Increased	5.403	bias	ADA,AFF1,BACH2,BATF,BHLHE40,BLNK,CBLB,CCL2,CCL5,CCR7,CD274,CD83,CDK6,CFLAR,CISH,CRLF2,CSF1,CSF2,CSF2RB,CSF3,CXCL10,DCSTAMP,DLL1,DLL4,DUSP5,EFNB2,EZH2,EZR,FADD,FLT3,Foxp1,GADD45A,GADD45B,GADD45G,GIMAP4,GPR68,HRH1,HS1BP3,ICAM1,ID2,IL10,IL12B,IL12RB2,IL17A,IL1RN,IL23A,IL27,IL27RA,IL2RA,IL7,IL7R,IL9,INHBA,IRF1,IRF4,ITGB3,ITGB8,ITPKC,JAG1,KLF4,LAT,LGALS3,LGALS8,LIF,LTA,MARCH1,MSC,NFIL3,NFKBIZ,NOS2,OSM…	99
Connective Tissue Disorders, Inflammatory Disease, Organismal Injury and Abnormalities, Skeletal and Muscular Disorders	Rheumatic Disease	3.56e-24	Increased	2.178		ADA,ADAM9,ADAMTS4,ADAMTS5,AMPD1,ARAP2,ATIC,ATP8A1,BID,BLNK,C3orf62,C9orf72,CCL2,CCL20,CCL22,CCL3L3,CCL4,CCL5,CCL8,CCR7,CD274,CD33,CD83,CDA,CDK6,CEMIP,CFB,CHI3L1,CSF1,CSF2,CSF2RB,CSF3,CTSA,CTSB,CTSL,CXCL10,CXCL2,DDX25,DUSP1,DUSP2,EBI3,EDN1,EPAS1,F11R,FLT3,G0S2,GAB1,GADD45B,GBP2,GBP6,GLUL,GRAMD1A,GUSB,HCAR3,HEXA,HMGCR,HRH1,ICAM1,IDO1,IFIH1,IFRD1,IL10,IL12B,IL17A,IL18BP,IL1RN,IL23A,IL27RA,IL2RA,IL33…	137
Cell Death and Survival	Necrosis	7.36e-24		1.254		A4GALT,ACKR3,ADA,AGAP3,AGRN,ARG2,ARHGEF3,ARL11,ATF3,ATP1A1,ATP6AP2,B4GALT5,BACH2,BHLHE40,BID,BIRC3,BLNK,CCDC86,CCK,CCL2,CCL3L3,CCL4,CCL5,CCR7,CD274,CD33,CD48,CD9,CDA,CDCP1,CDK6,CDON,CFLAR,CHI3L1,CISH,CNTFR,CREB3L1,CSF1,CSF2,CSF2RB,CSF3,CTSB,CTSZ,CTTN,CXCL10,CXCL2,CYP3A4,DLL1,DLL4,DOT1L,DPH5,DRAM1,DUSP1,DUSP4,DUSP5,EDN1,EFNB2,EHF,EMILIN2,ENC1,EPAS1,EVA1C,EZH2,EZR,FADD,FAM92A,FBXL2,FLT3,FRMD6,G0S2,…	235
Cellular Development, Cellular Growth and Proliferation, Hematological System Development and Function, Hematopoiesis, Lymphoid Tissue Structure and Development, Tissue Development	Hematopoiesis of mononuclear leukocytes	7.9e-24	Increased	5.307	bias	ADA,AFF1,BACH2,BATF,BHLHE40,BLNK,CBLB,CCL2,CCL5,CCR7,CD274,CD83,CDK6,CFLAR,CISH,CRLF2,CSF1,CSF2,CSF2RB,CXCL10,DCSTAMP,DLL1,DLL4,DUSP5,EFNB2,EZH2,EZR,FADD,FLT3,Foxp1,GADD45A,GADD45B,GADD45G,GIMAP4,GPR68,HRH1,HS1BP3,ICAM1,ID2,IL10,IL12B,IL12RB2,IL17A,IL1RN,IL23A,IL27,IL27RA,IL2RA,IL7,IL7R,IL9,INHBA,IRF1,IRF4,ITGB3,ITGB8,ITPKC,JAG1,KLF4,LAT,LGALS3,LGALS8,LIF,LTA,MARCH1,MSC,NFIL3,NFKBIZ,NOS2,OSM,PIM1…	98
Infectious Diseases	Bacterial Infections	8.7e-24		-0.658	bias	ADA,ARID5A,ATF3,BATF3,BID,BIRC3,BLNK,CCL2,CCL3L3,CCL4,CCL8,CCR7,CD274,CD83,CISH,CSF2,CSF3,CTSB,CTSL,CXCL10,DUSP1,EBI3,EPAS1,HMGCR,HRH1,ICAM1,IL10,IL12B,IL17A,IL1RN,IL23A,IL27,IL27RA,IL2RA,IL7,IRF4,ITGAV,LGALS3,LILRB5,LTA,LTBP2,MGLL,MST1R,MXI1,NFKBIB,NOD2,NOS2,NR3C1,OLFM4,OPTN,P2RY6,PDE10A,PDE7A,PLXNA1,PPP3CC,PTGS2,PTPN13,SDC1,SIGMAR1,SLAMF1,SLAMF8,STAT1,STAT4,TCN1,TFRC,TGM2,TIMP1,TNF,TNFAIP3,TNFR…	72
Cellular Movement	Infiltration by leukocytes	1.04e-23		1.875		ADA,BID,CBLB,CCL2,CCL22,CCL3L3,CCL4,CCL5,CCR7,CD274,CD48,CFB,CSF1,CSF2,CSF3,CTSB,CXCL10,CXCL2,DUSP1,EDN1,GJB2,HSPB1,ICAM1,IDO1,IGFBP3,IL10,IL12B,IL17A,IL18BP,IL1RN,IL23A,IL27RA,IL2RA,IL33,IL7,IL9,ITGB3,LGALS3,LTA,LTB4R,NFKBIZ,NOD2,NOS2,NPC1,NTN1,OLFM4,OSM,PELI1,PLA2G4A,PLTP,PPP1R15A,PTGS2,PTPN1,PTX3,SAA1,SGK1,SMAD3,SOCS3,STAT1,STAT5A,TBX21,TGM2,THBD,TIMP1,TNF,TNFAIP3,TNFRSF18,TNFRSF21,TNFSF4,ZC3H…	70
Cellular Movement	Cellular infiltration	1.25e-23		1.745		ADA,BID,CBLB,CCL2,CCL22,CCL3L3,CCL4,CCL5,CCR7,CD274,CD48,CFB,CSF1,CSF2,CSF2RB,CSF3,CTSB,CXCL10,CXCL2,DUSP1,EDN1,GJB2,HSPB1,ICAM1,IDO1,IGFBP3,IL10,IL12B,IL17A,IL18BP,IL1RN,IL23A,IL27RA,IL2RA,IL33,IL7,IL9,ITGB3,LGALS3,LIF,LTA,LTB4R,NFKBIZ,NOD2,NOS2,NPC1,NR3C1,NTN1,OLFM4,OSM,PELI1,PLA2G4A,PLTP,PPP1R15A,PRDX6,PTGS2,PTPN1,PTX3,SAA1,SELENBP1,SGK1,SMAD3,SOCS3,STAT1,STAT5A,TBX21,TGM2,THBD,TIMP1,TNF,TNFAI…	75
Cellular Movement, Hematological System Development and Function, Immune Cell Trafficking	Cellular infiltration by leukocytes	1.4e-23		1.722		ADA,BID,CBLB,CCL2,CCL22,CCL3L3,CCL4,CCL5,CCR7,CD274,CD48,CFB,CSF1,CSF2,CSF3,CTSB,CXCL10,CXCL2,DUSP1,EDN1,GJB2,HSPB1,ICAM1,IDO1,IGFBP3,IL10,IL12B,IL17A,IL18BP,IL1RN,IL23A,IL27RA,IL2RA,IL33,IL7,IL9,LGALS3,LTA,LTB4R,NFKBIZ,NOD2,NOS2,NPC1,NTN1,OLFM4,OSM,PELI1,PLA2G4A,PLTP,PPP1R15A,PTGS2,PTPN1,PTX3,SAA1,SGK1,SMAD3,SOCS3,STAT1,STAT5A,TBX21,TGM2,THBD,TIMP1,TNF,TNFAIP3,TNFRSF18,TNFRSF21,TNFSF4,ZC3H12A	69
Cell-To-Cell Signaling and Interaction	Activation of cells	1.42e-23	Increased	5.443	bias	ACKR3,ACSL5,ADA,ADAM9,ADGRF5,AGRN,ATF3,BACH2,BAMBI,BHLHE40,BID,BLNK,CBLB,CCK,CCL2,CCL22,CCL4,CCL5,CCL8,CCR7,CD274,CD48,CD83,CD9,CHI3L1,CISH,CREB3L1,CSF1,CSF2,CSF2RB,CSF3,CTSL,CXCL10,CXCL2,DLL1,DLL4,DUSP1,EDN1,EFNB2,FADD,FERMT2,FLT3,GADD45A,GDNF,GJA5,HPSE,HRH1,HSD11B1,ICAM1,IDO1,IL10,IL12B,IL12RB2,IL17A,IL19,IL1RN,IL23A,IL27,IL27RA,IL2RA,IL33,IL36G,IL7,IL9,INHBA,IRF1,IRF4,ITGAV,ITGB3,ITPKC,KCNJ2,K…	119
Cell-To-Cell Signaling and Interaction, Hematological System Development and Function, Immune Cell Trafficking, Inflammatory Response	Activation of leukocytes	1.76e-23	Increased	5.601	bias	ADA,ADAM9,ADGRF5,AGRN,ATF3,BACH2,BHLHE40,BID,BLNK,CBLB,CCL2,CCL22,CCL4,CCL5,CCL8,CCR7,CD274,CD48,CD83,CHI3L1,CISH,CSF1,CSF2,CSF2RB,CSF3,CTSL,CXCL10,DLL1,DLL4,DUSP1,EDN1,EFNB2,FADD,FLT3,GADD45A,GDNF,HPSE,HRH1,HSD11B1,ICAM1,IDO1,IL10,IL12B,IL12RB2,IL17A,IL19,IL1RN,IL23A,IL27,IL27RA,IL2RA,IL33,IL7,IL9,INHBA,IRF1,IRF4,ITGAV,ITPKC,KLF4,LAPTM5,LAT,LGALS3,LTA,LTB4R,MET,MST1R,NFIL3,NFKBIZ,NOD2,NOS2,NPC1,…	95
Cell Death and Survival	Cell death of immune cells	2.05e-23		1.885		ADA,ATF3,BID,BIRC3,BLNK,CCDC86,CCL2,CCL4,CCL5,CCR7,CD274,CD48,CD9,CFLAR,CHI3L1,CISH,CSF1,CSF2,CSF2RB,CSF3,CTSB,CXCL10,CXCL2,DLL1,DLL4,DRAM1,DUSP4,DUSP5,EZR,FADD,FLT3,GAB2,GADD45B,GIMAP4,ICAM1,ID2,IDO1,IER3,IFIH1,IL10,IL17A,IL19,IL1RN,IL27,IL27RA,IL2RA,IL33,IL7,IL7R,IL9,INHBA,IRF1,IRF4,ISG15,ITPR1,KLF4,LAT,LGALS3,LGALS8,MET,MYBL2,NFIL3,NFKBIB,NOS2,NPC1,NR3C1,PECAM1,PIM1,PLA2G4A,PNP,PPARA,PRDX6,RHO…	92
Cellular Movement	Cell movement of myeloid cells	3.93e-23	Increased	4.056	bias	ABCA1,BID,CCL2,CCL20,CCL22,CCL3L3,CCL4,CCL5,CCL8,CCR7,CD48,CD9,CFB,CSF1,CSF2,CSF3,CTSB,CTTN,CXCL10,CXCL2,DUSP1,EDN1,EPAS1,F11R,GJB2,HSPB1,ICAM1,IGFBP3,IL10,IL12B,IL17A,IL1RN,IL23A,IL27RA,IL2RA,IL33,IL9,INHBA,ITGA9,ITGAV,ITGB3,LGALS3,LTA,LTB4R,MAPK12,NFKBIZ,NOD2,NOS2,NPC1,NTN1,OLFM4,OSM,P2RY6,PECAM1,PLA2G4A,PLTP,PPARA,PPP1R15A,PRNP,PTGS2,PTPN1,PTX3,RHOB,S1PR1,SAA1,SDC1,SGK1,SLAMF1,SLAMF8,SMAD3,SOC…	84
Cellular Development, Cellular Growth and Proliferation, Hematological System Development and Function, Lymphoid Tissue Structure and Development	Cell proliferation of T lymphocytes	4.63e-23	Increased	2.303		BACH2,BATF,BHLHE40,BIRC3,CBLB,CCL2,CCL22,CCL4,CCL5,CCR7,CD274,CD33,CD48,CD83,CDK6,CFLAR,CISH,CRLF2,CSF2,CSF2RB,CTSZ,DLL4,DUSP1,DUSP5,EBI3,EFNB2,FADD,FLT3,Foxp1,GAB2,GADD45A,GADD45B,HRH1,ICAM1,ID2,IDO1,IL10,IL12B,IL12RB2,IL17A,IL23A,IL27,IL27RA,IL2RA,IL7,IL7R,IL9,INHBA,IRF1,IRF4,ISG20,ITGB3,JAG1,KLF4,LAPTM5,LAT,LGALS3,MXI1,NOS2,PECAM1,PELI1,PIM1,PNP,PRNP,PTGS2,RHOH,RNF128,SDC4,SERPINB9,SLAMF1,SMAD…	87
Cell-To-Cell Signaling and Interaction, Hematological System Development and Function	Activation of blood cells	6.66e-23	Increased	5.181	bias	ADA,ADAM9,ADGRF5,AGRN,ATF3,BACH2,BHLHE40,BID,BLNK,CBLB,CCL2,CCL22,CCL4,CCL5,CCL8,CCR7,CD274,CD48,CD83,CHI3L1,CISH,CSF1,CSF2,CSF2RB,CSF3,CTSL,CXCL10,DLL1,DLL4,DUSP1,EDN1,EFNB2,FADD,FLT3,GADD45A,GDNF,HPSE,HRH1,HSD11B1,ICAM1,IDO1,IL10,IL12B,IL12RB2,IL17A,IL19,IL1RN,IL23A,IL27,IL27RA,IL2RA,IL33,IL7,IL9,INHBA,IRF1,IRF4,ITGAV,ITGB3,ITPKC,KLF4,LAPTM5,LAT,LGALS3,LTA,LTB4R,MET,MST1R,NFIL3,NFKBIZ,NOD2,NOS2…	98
Connective Tissue Disorders, Inflammatory Disease, Inflammatory Response, Organismal Injury and Abnormalities, Skeletal and Muscular Disorders	Inflammation of joint	1.83e-22	Increased	2.506		ADA,ADAM9,ADAMTS4,ADAMTS5,AMPD1,ARAP2,ATIC,ATP8A1,BID,BLNK,C3orf62,C9orf72,CCL2,CCL20,CCL22,CCL3L3,CCL4,CCL5,CCL8,CCR7,CD274,CD33,CD83,CDA,CDK6,CEMIP,CFB,CHI3L1,CSF1,CSF2,CSF2RB,CSF3,CTSB,CXCL10,CXCL2,DDX25,DUSP1,DUSP2,EDN1,EPAS1,F11R,FLT3,G0S2,GADD45B,GBP2,GBP6,GLUL,GRAMD1A,GUSB,HEXA,HMGCR,HRH1,ICAM1,IL10,IL12B,IL17A,IL18BP,IL1RN,IL23A,IL27RA,IL2RA,IL33,IL7,IL7R,IL9,IRF1,ITPR1,LTA,LTB4R,MFHAS1,M…	122
Cell Death and Survival	Apoptosis of leukocytes	2.25e-22		-0.971		ADA,ATF3,BID,BIRC3,BLNK,CCDC86,CCL2,CCL4,CCL5,CCR7,CD274,CD9,CFLAR,CHI3L1,CSF1,CSF2,CSF3,CXCL2,DLL1,DLL4,DUSP4,DUSP5,EZR,FADD,FLT3,GADD45B,GIMAP4,ICAM1,IDO1,IER3,IL10,IL17A,IL19,IL1RN,IL27,IL2RA,IL33,IL7,IL7R,IL9,IRF1,IRF4,ISG15,ITPR1,KLF4,LGALS3,LGALS8,MET,NFKBIB,NOS2,NPC1,NR3C1,PECAM1,PIM1,PLA2G4A,PNP,PPARA,RHOH,S1PR1,SERPINB9,SFN,SMAD3,SOAT1,STAT1,STAT5A,TIMP1,TNF,TNFAIP3,TNFRSF18,TNFRSF21,TNF…	72
Inflammatory Response	Inflammation of body cavity	3.89e-22	Decreased	-2.195	bias	ABCA1,ADA,AGO2,ATF3,BACH2,BATF,BID,BIRC3,CCL2,CCL20,CCL22,CCL3L3,CCL4,CCL5,CCL8,CCR7,CD274,CD48,CFB,CFLAR,CISH,CRLF2,CSF1,CSF2,CSF2RB,CTSB,CTSL,CXCL10,CXCL2,CYP3A4,DUSP1,EBI3,EDN1,EPAS1,FLT3,GADD45A,GADD45B,GADD45G,GBP2,GDNF,GPX7,HMGCR,HRH1,HSD11B1,ICAM1,ID2,IDO1,IFIH1,IGFBP3,IL10,IL12B,IL12RB2,IL17A,IL1RN,IL23A,IL27RA,IL2RA,IL33,IL7,IL9,INSIG1,IRF1,ITGB3,ITGB8,LAT,LGALS3,LIF,LTA,MGLL,MPC1,NEDD4L…	118
Cellular Development, Cellular Growth and Proliferation, Embryonic Development, Hematological System Development and Function, Hematopoiesis, Lymphoid Tissue Structure and Development, Organ Development, Organismal Development, Tissue Development	Lymphopoiesis	1.1e-21	Increased	4.931	bias	ADA,AFF1,BACH2,BATF,BHLHE40,BLNK,CBLB,CCL5,CCR7,CD274,CD83,CDK6,CFLAR,CISH,CRLF2,CSF2,CXCL10,DLL1,DLL4,DUSP5,EFNB2,EZH2,EZR,FADD,FLT3,Foxp1,GADD45A,GADD45B,GADD45G,GIMAP4,HRH1,HS1BP3,ICAM1,ID2,IL10,IL12B,IL12RB2,IL17A,IL1RN,IL23A,IL27,IL27RA,IL2RA,IL7,IL7R,IL9,INHBA,IRF1,IRF4,ITGB8,ITPKC,JAG1,KLF4,LAT,LGALS3,LGALS8,LIF,LTA,MARCH1,MSC,NFIL3,NFKBIZ,NOS2,OSM,PIM1,PNP,PPARA,PPP2R3C,PRNP,PTGS2,RHOH,RN…	91
Cancer, Organismal Injury and Abnormalities	Cancer	2.43e-21	Increased	3.073		A4GALT,ABCA1,ABCA9,ABCB5,ABHD2,ABTB2,ACBD7,ACKR3,ACSL4,ACSL5,ADA,ADAM9,ADAMTS4,ADAMTS5,ADGRF1,ADGRF5,ADHFE1,AFF1,AGAP3,AGMAT,AGO2,AGPAT4,AGRN,AKAP6,ALAS1,ALS2CL,AMDHD2,AMPD1,ANKRD28,ANKRD33,ANKRD33B,ANO8,AP4S1,APOBEC3A,APOLD1,ARAP2,ARG2,ARHGAP28,ARHGAP35,ARHGEF16,ARHGEF3,ARID5A,ARL11,ARL5B,ATF3,ATIC,ATP1A1,ATP6AP2,ATP6V0D1,ATP6V1B2,ATP8A1,ATP8B1,AXDND1,B4GALT5,B4GALT6,BACH2,BAMBI,BATF,BBS10,BBS2,…	638
Immunological Disease	Systemic autoimmune syndrome	2.81e-21		0.841		ABCA1,ADA,ADAM9,ADAMTS4,AMPD1,ARAP2,ATIC,ATP8A1,BACH2,BLNK,C3orf62,C9orf72,CBLB,CCL2,CCL20,CCL22,CCL3L3,CCL4,CCL5,CCL8,CCR7,CD274,CD33,CD83,CDA,CDK6,CEMIP,CFB,CFLAR,CHI3L1,CISH,COL27A1,CSF1,CSF2,CSF2RB,CTSA,CTSB,CXCL10,CXCL2,DDX25,DUSP1,DUSP2,EPAS1,F11R,FLT3,G0S2,GADD45B,GBP2,GBP6,GIMAP4,GLUL,GRAMD1A,GUSB,HCAR3,HERC6,HEXA,HMGCR,HPSE,HRH1,HSD11B1,ICAM1,IFIH1,IFIT2,IFIT3,IFRD1,IL10,IL12B,IL17A,IL18…	127
Cellular Movement	Cell movement of tumor cell lines	3.02e-21	Increased	5.489	bias	ABCA1,ACKR3,ACSL4,ADAM9,ADGRF5,ANKRD28,ARHGAP35,ARHGEF16,ATF3,CBLB,CCL2,CCL20,CCL22,CCL4,CCL5,CCL8,CCR7,CD9,CDCP1,CLDN4,CNDP2,CREB3L1,CSF1,CSF2,CSF3,CTSB,CTSL,CTSZ,CTTN,CXCL10,CXCL2,DRAM1,DUSP5,EBI3,EDN1,EHF,EZH2,EZR,F11R,FADD,FBXL2,FERMT2,GAB1,GAB2,GBP2,GDNF,GNAI1,GSDMB,HRH1,ID2,IFIT2,IGFBP3,IL17A,IL19,ITGAV,ITGB3,ITPR1,KANK1,KLF4,LGALS3,LGALS8,LIF,LPAR1,LTBP2,MCF2L,MET,MRAS,MST1R,NOS2,NRP2,NTN1…	113
Cancer, Organismal Injury and Abnormalities	Malignant solid tumor	4.02e-21	Increased	2.208		A4GALT,ABCA1,ABCA9,ABCB5,ABHD2,ABTB2,ACBD7,ACKR3,ACSL4,ACSL5,ADA,ADAM9,ADAMTS4,ADAMTS5,ADGRF1,ADGRF5,ADHFE1,AFF1,AGAP3,AGMAT,AGO2,AGPAT4,AGRN,AKAP6,ALAS1,ALS2CL,AMDHD2,AMPD1,ANKRD28,ANKRD33,ANKRD33B,ANO8,AP4S1,APOBEC3A,APOLD1,ARAP2,ARG2,ARHGAP28,ARHGAP35,ARHGEF16,ARHGEF3,ARID5A,ARL11,ARL5B,ATF3,ATIC,ATP1A1,ATP6AP2,ATP6V0D1,ATP6V1B2,ATP8A1,ATP8B1,AXDND1,B4GALT5,B4GALT6,BACH2,BAMBI,BATF,BBS10,BBS2,…	634
Cancer, Organismal Injury and Abnormalities	Nonhematologic malignant neoplasm	5.43e-21		1.966		A4GALT,ABCA1,ABCA9,ABCB5,ABHD2,ABTB2,ACBD7,ACKR3,ACSL4,ACSL5,ADA,ADAM9,ADAMTS4,ADAMTS5,ADGRF1,ADGRF5,ADHFE1,AFF1,AGAP3,AGMAT,AGO2,AGPAT4,AGRN,AKAP6,ALAS1,ALS2CL,AMDHD2,AMPD1,ANKRD28,ANKRD33,ANKRD33B,ANO8,AP4S1,APOBEC3A,APOLD1,ARAP2,ARG2,ARHGAP28,ARHGAP35,ARHGEF16,ARHGEF3,ARID5A,ARL11,ARL5B,ATF3,ATIC,ATP1A1,ATP6AP2,ATP6V0D1,ATP6V1B2,ATP8A1,ATP8B1,AXDND1,B4GALT5,B4GALT6,BACH2,BAMBI,BATF,BBS10,BBS2,…	631
Lipid Metabolism, Molecular Transport, Small Molecule Biochemistry	Concentration of lipid	8.5e-21		0.759		A4GALT,ABCA1,ACSL4,ADA,ADGRF5,AGPAT4,ATF3,ATP1A1,ATP8B1,BHLHE40,BID,CCL2,CFB,CSF1,CSF2,CSF3,CYP27A1,CYP27B1,CYP3A4,DDX25,DGAT2,DUSP1,EDN1,ELOVL5,EZH2,FABP5,FADD,FADS2,FAM57B,G0S2,GAL,GBP5,GNAI1,GPD2,HEXB,HMGCR,HRH1,HSD11B1,HSD3B7,ICAM1,IFRD1,IL10,IL12RB2,IL17A,IL18BP,IL1RN,IL33,IL9,INHBA,INSIG1,ITGB3,LGALS3,LGALS8,LIF,LPGAT1,MECP2,MGLL,MPC1,MRAS,MRC1,NEDD4L,NEU1,NFIL3,NOD2,NOS2,NPC1,NPC2,NR3C1,NT…	102
Cell Death and Survival	Cell death of mononuclear leukocytes	1.55e-20		0.2		ADA,BID,BLNK,CCDC86,CCL4,CCL5,CD274,CD9,CFLAR,CHI3L1,CSF1,CSF2,CSF3,CTSB,CXCL10,DLL1,DLL4,DRAM1,DUSP4,DUSP5,EZR,FADD,FLT3,GADD45B,GIMAP4,ICAM1,ID2,IDO1,IER3,IL10,IL19,IL27,IL2RA,IL7,IL7R,IL9,IRF4,ITPR1,KLF4,LAT,LGALS3,LGALS8,MET,NFKBIB,NOS2,NR3C1,PECAM1,PNP,PPARA,RHOH,S1PR1,SERPINB9,SFN,SMAD3,STAT1,STAT5A,TBX21,TGM2,TIMP1,TNF,TNFRSF18,TNFRSF21,TNFRSF25,UBD	64
Cellular Movement, Hematological System Development and Function, Immune Cell Trafficking, Inflammatory Response	Cell movement of phagocytes	1.61e-20	Increased	4.279	bias	ABCA1,BID,CCL2,CCL20,CCL22,CCL3L3,CCL4,CCL5,CCL8,CCR7,CD9,CFB,CSF1,CSF2,CSF3,CTSB,CTSZ,CTTN,CXCL10,CXCL2,DUSP1,EDN1,EPAS1,F11R,GJB2,HPSE,HRH1,HSPB1,ICAM1,IL10,IL12B,IL17A,IL1RN,IL23A,IL2RA,IL33,IL9,INHBA,ITGA9,ITGAV,ITGB3,LGALS3,LTA,LTB4R,MAPK12,NFKBIZ,NOD2,NOS2,NPC1,NRP2,NTN1,P2RY6,PECAM1,PLA2G4A,PLTP,PPP1R15A,PRNP,PTGS2,PTPN1,PTX3,RHOB,S1PR1,SAA1,SDC1,SGK1,SLAMF1,SLAMF8,SMAD3,SOCS3,STAT1,THBD,T…	80
Inflammatory Response, Neurological Disease	Inflammation of central nervous system	1.72e-20		0.945		AGO2,ARID5A,BATF,BHLHE40,CBLB,CCL3L3,CCL5,CCR7,CD274,CSF2,CSF3,CTSB,CXCL10,DLL1,DLL4,DUSP1,EBI3,GADD45B,HEXB,HRH1,ID2,IDO1,IL10,IL12B,IL12RB2,IL17A,IL18BP,IL1RN,IL23A,IL27,IL27RA,IL2RA,IL9,IRF1,IRF4,ITGA9,ITGB8,JAG1,KLF4,LGALS3,LIF,MGLL,NFKBIZ,NOS2,NR3C1,PECAM1,PELI1,PLA2G4A,PPARA,PPP3CC,PTGS2,RNF128,S1PR1,SDC1,STAT1,STAT4,TBX21,TIMP1,TNF,TNFAIP3,TNFRSF21,TNFSF15,TNFSF4,TOB1	64
Cancer, Organismal Injury and Abnormalities	Solid tumor	2.05e-20	Increased	2.328		A4GALT,ABCA1,ABCA9,ABCB5,ABHD2,ABTB2,ACBD7,ACKR3,ACSL4,ACSL5,ADA,ADAM9,ADAMTS4,ADAMTS5,ADGRF1,ADGRF5,ADHFE1,AFF1,AGAP3,AGMAT,AGO2,AGPAT4,AGRN,AKAP6,ALAS1,ALS2CL,AMDHD2,AMPD1,ANKRD28,ANKRD33,ANKRD33B,ANO8,AP4S1,APOBEC3A,APOLD1,ARAP2,ARG2,ARHGAP28,ARHGAP35,ARHGEF16,ARHGEF3,ARID5A,ARL11,ARL5B,ATF3,ATIC,ATP1A1,ATP6AP2,ATP6V0D1,ATP6V1B2,ATP8A1,ATP8B1,AXDND1,B4GALT5,B4GALT6,BACH2,BAMBI,BATF,BBS10,BBS2,…	636
Cell-To-Cell Signaling and Interaction	Activation of lymphatic system cells	2.36e-20	Increased	4.086	bias	ADA,AGRN,BACH2,BHLHE40,BLNK,CBLB,CCL2,CCL22,CCL4,CCL5,CCL8,CCR7,CD274,CD48,CD83,CISH,CSF2,CSF2RB,CXCL10,DLL1,DLL4,DUSP1,EFNB2,FADD,FLT3,GADD45A,ICAM1,IL10,IL12B,IL12RB2,IL17A,IL19,IL1RN,IL23A,IL27,IL27RA,IL2RA,IL33,IL7,IL9,IRF1,IRF4,ITGAV,ITPKC,LAPTM5,LAT,LGALS3,NFIL3,NFKBIZ,NOD2,OSM,PECAM1,PELI1,PLTP,PRNP,RHOB,SAA1,SERPINB9,SLAMF1,SMAD3,STAT1,STAT4,STAT5A,TBX21,TNF,TNFAIP3,TNFRSF18,TNFRSF21,TNFS…	70
Cellular Function and Maintenance	Homeostasis of blood cells	3.11e-20	Increased	4.857	bias	ADA,AFF1,BATF,BHLHE40,CBLB,CCL5,CCR7,CD274,CD83,CDK6,CFLAR,CISH,CSF2,CSF2RB,CXCL10,DLL1,DLL4,EFNB2,EPAS1,EZH2,FADD,FLT3,Foxp1,GADD45B,GADD45G,GIMAP4,HRH1,HS1BP3,ICAM1,ID2,IL10,IL12B,IL12RB2,IL17A,IL1RN,IL23A,IL27,IL27RA,IL2RA,IL7,IL7R,IL9,INHBA,IRF1,IRF4,ITGB8,ITPKC,JAG1,KLF4,LAT,LIF,LTA,MARCH1,NFIL3,NFKBIZ,NOS2,OSM,PIM1,PNP,PPP2R3C,PRNP,PTGS2,RHOH,RNF128,RSAD2,RUNX2,S1PR1,SLAMF1,SMAD3,SOCS3,STAT…	82
Cancer, Organismal Injury and Abnormalities	Non-melanoma solid tumor	3.15e-20	Increased	2.13		ABCA1,ABCA9,ABCB5,ABHD2,ABTB2,ACBD7,ACKR3,ACSL4,ADA,ADAM9,ADAMTS4,ADAMTS5,ADHFE1,AFF1,AGAP3,AGO2,AGPAT4,AGRN,AKAP6,ALAS1,ALS2CL,AMDHD2,AMPD1,ANKRD28,ANKRD33,ANKRD33B,ANO8,AP4S1,APOBEC3A,APOLD1,ARAP2,ARG2,ARHGAP28,ARHGAP35,ARHGEF16,ARHGEF3,ARID5A,ARL11,ARL5B,ATF3,ATIC,ATP1A1,ATP6AP2,ATP6V0D1,ATP6V1B2,ATP8A1,ATP8B1,AXDND1,B4GALT5,B4GALT6,BACH2,BAMBI,BATF,BBS10,BBS2,BCAS1,BFAR,BHLHE40,BID,BIRC3,BLNK…	608
Cell-To-Cell Signaling and Interaction, Hematological System Development and Function, Immune Cell Trafficking, Inflammatory Response	Activation of mononuclear leukocytes	3.34e-20	Increased	4.498	bias	ADA,ADAM9,AGRN,BACH2,BHLHE40,BLNK,CBLB,CCL2,CCL22,CCL4,CCL5,CCL8,CCR7,CD274,CD48,CD83,CISH,CSF1,CSF2,CSF2RB,CXCL10,DLL1,DLL4,DUSP1,EFNB2,FADD,FLT3,GADD45A,ICAM1,IL10,IL12B,IL12RB2,IL17A,IL19,IL1RN,IL23A,IL27,IL27RA,IL2RA,IL33,IL7,IL9,IRF1,IRF4,ITGAV,ITPKC,LAPTM5,LAT,LGALS3,NFIL3,NFKBIZ,NOD2,OSM,PECAM1,PELI1,PRNP,RHOB,SAA1,SERPINB9,SLAMF1,SMAD3,STAT1,STAT4,STAT5A,TBX21,TNF,TNFAIP3,TNFRSF18,TNFRSF2…	71
Cell-To-Cell Signaling and Interaction, Hematological System Development and Function, Immune Cell Trafficking, Inflammatory Response	Activation of lymphocytes	3.38e-20	Increased	4.232	bias	ADA,AGRN,BACH2,BHLHE40,BLNK,CBLB,CCL2,CCL22,CCL4,CCL5,CCL8,CCR7,CD274,CD48,CD83,CISH,CSF2,CSF2RB,CXCL10,DLL1,DLL4,DUSP1,EFNB2,FADD,FLT3,GADD45A,ICAM1,IL10,IL12B,IL12RB2,IL17A,IL19,IL1RN,IL23A,IL27,IL27RA,IL2RA,IL33,IL7,IL9,IRF1,IRF4,ITGAV,ITPKC,LAPTM5,LAT,LGALS3,NFIL3,NFKBIZ,NOD2,OSM,PECAM1,PELI1,PRNP,RHOB,SAA1,SERPINB9,SLAMF1,SMAD3,STAT1,STAT4,STAT5A,TBX21,TNF,TNFAIP3,TNFRSF18,TNFRSF21,TNFSF4,UL…	69
Cellular Function and Maintenance	Homeostasis of leukocytes	3.72e-20	Increased	4.779	bias	ADA,AFF1,BATF,BHLHE40,CBLB,CCL5,CCR7,CD274,CD83,CDK6,CFLAR,CISH,CSF2,CSF2RB,CXCL10,DLL1,DLL4,EFNB2,EZH2,FADD,FLT3,Foxp1,GADD45B,GADD45G,GIMAP4,HRH1,HS1BP3,ICAM1,ID2,IL10,IL12B,IL12RB2,IL17A,IL1RN,IL23A,IL27,IL27RA,IL2RA,IL7,IL7R,IL9,INHBA,IRF1,IRF4,ITGB8,ITPKC,JAG1,KLF4,LAT,LIF,LTA,MARCH1,NFIL3,NFKBIZ,NOS2,OSM,PIM1,PNP,PPP2R3C,PRNP,PTGS2,RHOH,RNF128,RSAD2,RUNX2,S1PR1,SLAMF1,SMAD3,SOCS3,STAT1,STAT…	81
Cell Death and Survival	Cell death of tumor cell lines	3.73e-20		1.831		A4GALT,ACKR3,ARHGEF3,ARL11,ATF3,ATP1A1,BACH2,BHLHE40,BID,BIRC3,BLNK,CCK,CCL2,CD274,CD48,CDA,CDCP1,CDK6,CDON,CFLAR,CREB3L1,CSF2,CSF2RB,CTSB,CTTN,CYP3A4,DLL1,DPH5,DRAM1,DUSP1,DUSP4,EDN1,EHF,EMILIN2,ENC1,EPAS1,EVA1C,EZH2,EZR,FADD,FAM92A,FBXL2,FLT3,FRMD6,G0S2,GAB1,GADD45A,GADD45B,GADD45G,GAL,GDNF,GEM,GIMAP4,GPX7,HPSE,HSPB1,IDO1,IER3,IFIH1,IFRD1,IGFBP3,IL10,IL17A,IL1RN,IL7,INHBA,IRF1,IRF4,ITGAV,ITGB3,…	155
Immunological Disease, Inflammatory Disease, Inflammatory Response, Neurological Disease, Organismal Injury and Abnormalities	Experimental autoimmune encephalomyelitis	3.93e-20		1.191		AGO2,ARID5A,BATF,BHLHE40,CBLB,CCL5,CCR7,CD274,CSF2,CSF3,CXCL10,DLL1,DLL4,DUSP1,EBI3,GADD45B,HRH1,ID2,IDO1,IL10,IL12B,IL12RB2,IL17A,IL18BP,IL1RN,IL23A,IL27,IL27RA,IL2RA,IL9,IRF1,IRF4,ITGA9,ITGB8,JAG1,KLF4,LIF,NFKBIZ,NOS2,NR3C1,PECAM1,PELI1,PLA2G4A,PPARA,RNF128,S1PR1,SDC1,STAT1,STAT4,TBX21,TIMP1,TNF,TNFRSF21,TNFSF15,TNFSF4,TOB1	56
Cell-To-Cell Signaling and Interaction, Hematological System Development and Function, Immune Cell Trafficking, Inflammatory Response	Activation of T lymphocytes	4.25e-20	Increased	3.913	bias	ADA,AGRN,BACH2,BHLHE40,CBLB,CCL2,CCL22,CCL4,CCL5,CCL8,CD274,CD48,CD83,CISH,CSF2,CSF2RB,CXCL10,DLL1,DLL4,DUSP1,EFNB2,FADD,GADD45A,ICAM1,IL10,IL12B,IL12RB2,IL17A,IL19,IL23A,IL27,IL27RA,IL2RA,IL33,IL7,IL9,IRF4,ITGAV,ITPKC,LAPTM5,LAT,NFIL3,OSM,PECAM1,PELI1,PRNP,RHOB,SAA1,SERPINB9,SLAMF1,SMAD3,STAT1,STAT4,STAT5A,TBX21,TNF,TNFRSF18,TNFRSF21,TNFSF4	59
Cellular Function and Maintenance	Function of mononuclear leukocytes	4.48e-20		0.734		ATF3,BACH2,BATF3,BHLHE40,BIRC3,CBLB,CCL2,CCR7,CD274,CHI3L1,CSF1,CSF2RB,CXCL10,DUSP1,EBI3,GADD45B,GADD45G,GIMAP4,ICAM1,IL10,IL12B,IL12RB2,IL23A,IL27,IL27RA,IL2RA,IL33,IL7,IL9,IRF1,LAT,LTA,NOD2,NOS2,NPC2,PLXNA1,PNP,PTPN13,RGS16,RNF128,S1PR1,SERPINB9,SLAMF1,SMAD3,STAT1,STAT4,STAT5A,TBX21,TGM2,TNF,TNFRSF18,TNFRSF21,TOB1,UBD	54
Connective Tissue Disorders, Organismal Injury and Abnormalities, Skeletal and Muscular Disorders	Non-traumatic arthropathy	4.87e-20		0.264		ADA,ADAM9,ADAMTS4,ADAMTS5,AMPD1,ARAP2,ATIC,ATP8A1,BLNK,C3orf62,C9orf72,CCL2,CCL20,CCL22,CCL4,CCL5,CCL8,CCR7,CD274,CD33,CD83,CDA,CDK6,CEMIP,CFB,CHI3L1,CSF1,CSF2,CSF2RB,CTSB,CXCL10,CXCL2,DDX25,DUSP1,DUSP2,EPAS1,F11R,FLT3,G0S2,GADD45B,GBP2,GBP6,GLUL,GRAMD1A,GUSB,HEXA,HMGCR,HRH1,ICAM1,IL10,IL17A,IL18BP,IL1RN,IL2RA,IL33,IL7,IL7R,IL9,ITPR1,LTA,MFHAS1,MGLL,MLLT6,MLPH,MPC1,MRC1,MS4A7,NR3C1,OSM,PECAM1,PPP…	104
Connective Tissue Disorders, Immunological Disease, Inflammatory Disease, Inflammatory Response, Organismal Injury and Abnormalities, Skeletal and Muscular Disorders	Rheumatoid arthritis	5.34e-20		0.413		ADA,ADAM9,ADAMTS4,AMPD1,ARAP2,ATIC,ATP8A1,BLNK,C3orf62,C9orf72,CCL2,CCL20,CCL22,CCL4,CCL5,CCL8,CCR7,CD274,CD33,CD83,CDA,CDK6,CEMIP,CFB,CHI3L1,CSF1,CSF2,CSF2RB,CTSB,CXCL10,CXCL2,DDX25,DUSP1,DUSP2,EPAS1,F11R,FLT3,G0S2,GADD45B,GBP2,GBP6,GLUL,GRAMD1A,GUSB,HEXA,HMGCR,HRH1,ICAM1,IL10,IL17A,IL18BP,IL1RN,IL2RA,IL33,IL7,IL7R,IL9,ITPR1,LTA,MFHAS1,MGLL,MLLT6,MLPH,MPC1,MRC1,MS4A7,NR3C1,OSM,PECAM1,PPP3CC,PRNP…	96
Cellular Movement	Infiltration by myeloid cells	9.03e-20	Increased	2.314		BID,CCL2,CCL4,CCL5,CCR7,CD48,CFB,CSF1,CSF2,CSF3,CTSB,CXCL10,CXCL2,DUSP1,EDN1,GJB2,HSPB1,ICAM1,IL10,IL12B,IL17A,IL1RN,IL27RA,IL2RA,IL33,IL9,ITGB3,LGALS3,LTA,LTB4R,NFKBIZ,NOS2,NPC1,NTN1,OLFM4,OSM,PLA2G4A,PLTP,PPP1R15A,PTGS2,PTPN1,PTX3,SAA1,SGK1,SMAD3,SOCS3,STAT1,TGM2,THBD,TIMP1,TNF,TNFAIP3,TNFRSF18,TNFRSF21,TNFSF4	55
Inflammatory Disease, Inflammatory Response, Neurological Disease, Organismal Injury and Abnormalities	Encephalitis	9.11e-20		1.299		AGO2,ARID5A,BATF,BHLHE40,CBLB,CCL5,CCR7,CD274,CSF2,CSF3,CTSB,CXCL10,DLL1,DLL4,DUSP1,EBI3,GADD45B,HRH1,ID2,IDO1,IL10,IL12B,IL12RB2,IL17A,IL18BP,IL1RN,IL23A,IL27,IL27RA,IL2RA,IL9,IRF1,IRF4,ITGA9,ITGB8,JAG1,KLF4,LGALS3,LIF,MGLL,NFKBIZ,NOS2,NR3C1,PECAM1,PELI1,PLA2G4A,PPARA,PPP3CC,RNF128,S1PR1,SDC1,STAT1,STAT4,TBX21,TIMP1,TNF,TNFRSF21,TNFSF15,TNFSF4,TOB1	60
Cell Death and Survival	Cell viability	1.35e-19	Increased	7.022	bias	ABCA1,ABCB5,ACKR3,ACSL5,AGO2,AGRN,APOBEC3A,ATF3,B4GALT5,BHLHE40,BID,BLNK,CAMK2N1,CARS,CCL2,CCL4,CCL5,CCR7,CD33,CD48,CD9,CDK6,CFLAR,CHI3L1,CISH,CLDN4,CNDP2,CSF1,CSF2,CSF2RB,CSF3,CTSB,CXCL10,CXCL2,CYP3A4,DOT1L,DPH5,DUSP1,DUSP5,EDN1,EMILIN2,EZH2,EZR,FADD,FBL,FBXL2,FLT3,GAB1,GAB2,GADD45A,GADD45B,GDNF,GRK4,HMOX2,HPSE,HSPB1,ICAM1,ID2,IER3,IFIH1,IGFBP3,IL10,IL17A,IL1RN,IL27,IL27RA,IL33,IL7,IL7R,IL9,INSI…	139
Cellular Function and Maintenance	Lymphocyte homeostasis	1.78e-19	Increased	4.668	bias	ADA,AFF1,BATF,BHLHE40,CBLB,CCL5,CCR7,CD274,CD83,CDK6,CFLAR,CISH,CSF2,CXCL10,DLL1,DLL4,EFNB2,EZH2,FADD,Foxp1,GADD45B,GADD45G,GIMAP4,HRH1,HS1BP3,ICAM1,ID2,IL10,IL12B,IL12RB2,IL17A,IL1RN,IL23A,IL27,IL27RA,IL2RA,IL7,IL7R,IL9,INHBA,IRF1,IRF4,ITGB8,ITPKC,JAG1,KLF4,LAT,LIF,LTA,MARCH1,NFIL3,NFKBIZ,NOS2,OSM,PIM1,PNP,PPP2R3C,PRNP,PTGS2,RHOH,RNF128,RSAD2,RUNX2,S1PR1,SLAMF1,SMAD3,SOCS3,STAT1,STAT4,STAT5A,TBX…	79
Cellular Function and Maintenance	Function of antigen presenting cells	2.13e-19		1.144	bias	ADA,BATF3,BIRC3,CCL2,CCL5,CCR7,CD274,CD9,CHI3L1,CSF1,CSF2,CSF2RB,CTSZ,CXCL10,DUSP4,F11R,GADD45B,GPR68,HSPB1,ICAM1,IDO1,IFIH1,IL10,IL12B,IL23A,IL27,IRF1,ITGB3,LGALS3,LTA,LTB4R,MST1R,NOD2,NOS2,P2RY6,PLA2G15,PLA2G4A,PLXNA1,PTGS2,SGMS2,SIGMAR1,SLAMF1,SLAMF8,STAT1,TNF,TRAF4	46
Cell Death and Survival	Cell survival	2.88e-19	Increased	7.247	bias	ABCA1,ABCB5,ACKR3,ACSL5,AGO2,AGRN,APOBEC3A,ATF3,B4GALT5,BAMBI,BHLHE40,BID,BLNK,CAMK2N1,CARS,CBLB,CCL2,CCL4,CCL5,CCR7,CD33,CD48,CD9,CDK6,CFLAR,CHI3L1,CISH,CLDN4,CNDP2,CNTFR,CSF1,CSF2,CSF2RB,CSF3,CTSB,CXCL10,CXCL2,CYP3A4,DOT1L,DPH5,DUSP1,DUSP5,EDN1,EFNB2,EMILIN2,EZH2,EZR,FADD,FBL,FBXL2,FLT3,GAB1,GAB2,GADD45A,GADD45B,GDNF,GRK4,HMOX2,HPSE,HSPB1,ICAM1,ID2,IER3,IFIH1,IGFBP3,IL10,IL17A,IL1RN,IL27,IL27RA…	144
Cell-mediated Immune Response, Cellular Function and Maintenance, Hematological System Development and Function	T cell homeostasis	3.5e-19	Increased	4.605	bias	ADA,AFF1,BATF,BHLHE40,CBLB,CCL5,CCR7,CD274,CD83,CDK6,CFLAR,CISH,CSF2,CXCL10,DLL1,DLL4,EFNB2,EZH2,FADD,Foxp1,GADD45B,GADD45G,GIMAP4,HRH1,HS1BP3,ICAM1,ID2,IL10,IL12B,IL12RB2,IL17A,IL23A,IL27,IL27RA,IL2RA,IL7,IL7R,IL9,INHBA,IRF1,IRF4,ITGB8,ITPKC,JAG1,KLF4,LAT,LIF,LTA,MARCH1,NFKBIZ,NOS2,OSM,PIM1,PNP,PPP2R3C,PRNP,PTGS2,RHOH,RNF128,RSAD2,RUNX2,S1PR1,SMAD3,SOCS3,STAT1,STAT4,STAT5A,TBX21,THEMIS2,THRA,TNF…	76
Cell-mediated Immune Response, Cellular Development, Cellular Function and Maintenance, Cellular Growth and Proliferation, Embryonic Development, Hematological System Development and Function, Hematopoiesis, Lymphoid Tissue Structure and Development, Organ Development, Organismal Development, Tissue Development	T cell development	3.53e-19	Increased	4.602	bias	ADA,AFF1,BATF,BHLHE40,CBLB,CCL5,CCR7,CD274,CD83,CDK6,CFLAR,CISH,CSF2,CXCL10,DLL1,DLL4,EFNB2,EZH2,FADD,Foxp1,GADD45B,GADD45G,GIMAP4,HRH1,HS1BP3,ICAM1,ID2,IL10,IL12B,IL12RB2,IL17A,IL23A,IL27,IL27RA,IL2RA,IL7,IL7R,IL9,INHBA,IRF1,IRF4,ITGB8,ITPKC,JAG1,KLF4,LAT,LIF,LTA,MARCH1,NFKBIZ,NOS2,OSM,PIM1,PNP,PRNP,PTGS2,RHOH,RNF128,RSAD2,RUNX2,S1PR1,SMAD3,SOCS3,STAT1,STAT4,STAT5A,TBX21,THEMIS2,THRA,TNF,TNFAIP3…	75
Organismal Development	Morphology of body cavity	3.82e-19				ABCA1,ACKR3,ACSL4,ADA,ADAM9,ADGRF5,AGO2,ARG2,ARHGAP35,ATF3,ATP6AP2,BBS10,BHLHE40,BID,BIRC3,BLNK,CCK,CCR7,CD9,CDK6,CFB,CFLAR,CISH,CRIM1,CSF1,CSF2,CSF2RB,CSF3,CTSA,CTSB,CTSK,CYP27A1,CYP27B1,DLL4,DOT1L,DUSP1,DUSP5,ECE1,EDN1,EFNB2,EPAS1,FABP5,FADD,FADS2,FAM20A,Foxp1,G0S2,GADD45A,GADD45G,GAL,GDNF,GJA5,GPX7,HEXA,HEXB,HMGCR,HOPX,HSD11B1,ICAM1,ID2,IDO1,IER3,IFRD1,IGFBP3,IL10,IL1RN,IL2RA,IL33,IL7,IL7R,IL9…	151
Cell Death and Survival	Apoptosis of tumor cell lines	3.9e-19	Increased	2.125		A4GALT,ARHGEF3,ARL11,ATF3,BACH2,BHLHE40,BID,BIRC3,BLNK,CCK,CD274,CD48,CDCP1,CDK6,CDON,CFLAR,CSF2,CSF2RB,CTSB,CTTN,CYP3A4,DLL1,DPH5,DUSP1,DUSP4,EDN1,EHF,EMILIN2,ENC1,EPAS1,EVA1C,EZH2,EZR,FADD,FAM92A,FBXL2,FLT3,G0S2,GAB1,GADD45A,GADD45B,GADD45G,GAL,GDNF,GEM,GIMAP4,HPSE,HSPB1,IDO1,IER3,IGFBP3,IL10,IL17A,IL7,INHBA,IRF1,IRF4,ITGAV,ITPR1,JAG1,KLF4,LGALS3,LGALS8,LIF,MAPK12,MET,MST1R,MXI1,MYBL1,NFIL3,NFK…	130
Hematological System Development and Function, Inflammatory Response, Tissue Morphology	Quantity of phagocytes	4.22e-19		1.392		ABCA1,ADA,ATF3,BATF3,BID,BIRC3,CCL2,CCL20,CCL22,CCL3L3,CCR7,CD83,CSF1,CSF2,CSF3,CTSB,CXCL10,CXCL2,EZH2,FLT3,GAB2,GPR68,HPSE,HSD11B1,ICAM1,ID2,IDO1,IGFBP3,IL10,IL12B,IL12RB2,IL17A,IL18BP,IL1RN,IL23A,IL2RA,IL33,IL7R,IL9,IRF1,IRF4,ITGB3,LGALS3,LIF,LTA,NEDD4L,NFKBIB,NOD2,NOS2,NPC1,PLA2G15,S1PR5,SMAD3,SOAT1,SOCS3,STAT4,STAT5A,TBX21,TGM2,THBD,THRA,TIMP1,TNF,TNFAIP3,USP2	65
Cancer, Organismal Injury and Abnormalities	Tumorigenesis of tissue	4.44e-19		0.884		ABCA1,ABCA9,ABCB5,ABHD2,ABTB2,ACBD7,ACSL4,ADA,ADAM9,ADAMTS4,ADAMTS5,ADHFE1,AFF1,AGAP3,AGO2,AGPAT4,AGRN,AKAP6,ALAS1,ALS2CL,AMDHD2,AMPD1,ANKRD28,ANKRD33,ANKRD33B,ANO8,AP4S1,APOBEC3A,APOLD1,ARAP2,ARG2,ARHGAP28,ARHGAP35,ARHGEF16,ARHGEF3,ARID5A,ARL11,ARL5B,ATIC,ATP1A1,ATP6AP2,ATP6V0D1,ATP6V1B2,ATP8A1,ATP8B1,AXDND1,B4GALT5,B4GALT6,BACH2,BAMBI,BATF,BBS10,BBS2,BCAS1,BFAR,BHLHE40,BID,BLNK,BOC,BTBD19,BTD,C…	602
Immunological Disease	Abnormal morphology of immune system	4.82e-19				ADGRF5,AFF1,BACH2,BATF,BHLHE40,BLNK,CBLB,CCDC86,CD274,CHI3L1,CHST15,CISH,CRISPLD2,CSF1,CSF2,EBI3,HEXB,HPSE,ICAM1,ID2,IL10,IL1RN,IL2RA,IL7,IL7R,IL9,IRF1,IRF4,ITPKC,LAT,LGALS3,LIF,LTA,MARCH1,MXI1,NFIL3,NFKBIB,NFKBIZ,NOD2,NOS2,NPC2,PLA2G15,RHOH,SERPINB9,SGMS2,SMAD3,SOAT1,STAT5A,TBX21,TMPRSS6,TNF,TOX	52
Cellular Function and Maintenance, Hematological System Development and Function	Function of lymphocytes	8.64e-19		0.627	bias	ATF3,BACH2,BATF3,BHLHE40,BIRC3,CBLB,CCR7,CD274,CHI3L1,CSF2RB,CXCL10,DUSP1,EBI3,GADD45B,GADD45G,GIMAP4,ICAM1,IL10,IL12B,IL12RB2,IL23A,IL27,IL27RA,IL2RA,IL33,IL7,IL9,IRF1,LAT,LTA,NOD2,NOS2,NPC2,PLXNA1,PNP,PTPN13,RGS16,RNF128,S1PR1,SERPINB9,SLAMF1,SMAD3,STAT1,STAT4,STAT5A,TBX21,TGM2,TNF,TNFRSF18,TNFRSF21,TOB1,UBD	52
Cellular Movement	Migration of tumor cell lines	9.24e-19	Increased	5.07	bias	ACKR3,ACSL4,ADAM9,ADGRF5,ANKRD28,ARHGAP35,ARHGEF16,ATF3,CBLB,CCL2,CCL20,CCL22,CCL5,CCR7,CD9,CDCP1,CLDN4,CNDP2,CREB3L1,CSF1,CSF2,CSF3,CTSB,CTSL,CTSZ,CTTN,CXCL10,CXCL2,DUSP5,EBI3,EDN1,EHF,EZH2,EZR,FBXL2,GAB1,GAB2,GDNF,GNAI1,ID2,IFIT2,IGFBP3,IL17A,IL19,ITGAV,ITGB3,ITPR1,KANK1,KLF4,LGALS3,LPAR1,LTBP2,MCF2L,MET,MRAS,MST1R,NOS2,NRP2,NTN1,OSGIN1,OSM,PECAM1,PHACTR1,PLXNA1,PPARA,PPIF,PRNP,PTGS2,PTPN1,PTTG…	95
Immunological Disease	Allergy	9.48e-19		1.476		ABCA1,CCL20,CCL22,CCL4,CCL5,CD274,CISH,CSF2,CSF2RB,CTSL,DUSP1,DUSP2,EZH2,FABP5,FADS2,GAB2,GADD45A,HMGCR,HPSE,HRH1,ICAM1,IL10,IL12B,IL17A,IL18BP,IL1RN,IL2RA,IL33,IL36G,IL9,LAT,LTB4R,MXI1,NFKBIZ,NOS2,NR3C1,OPTN,OSM,PDE7A,PECAM1,PLA2G4A,PPARA,PPP3CC,PRDX6,PTGES2,PTGIR,PTGS2,S100A2,SELENBP1,SMAD3,SOCS3,STAT1,TBX21,TFRC,TGM2,TGM3,TIMP1,TNF,TNFAIP3,TNFAIP6,TNFRSF25,TNFSF15,TUBB1,ZNF331	64
Gastrointestinal Disease, Hepatic System Disease, Organismal Injury and Abnormalities	Damage of liver	1.09e-18		1.417		ATP8B1,CBLB,CCL2,CCL20,CCL4,CCL5,CCR7,CD274,CSF1,CSF2RB,CSF3,CTSB,CXCL10,CYP3A4,DUSP1,EBI3,EDN1,HMGCR,IL10,IL17A,IL1RN,IL23A,IL27,IL27RA,IL2RA,INHBA,IRF1,LIF,LTA,MET,NFKBIB,NOS2,NPC1,NR3C1,OSM,PPARA,PPP3CC,PTGS2,PTPN1,SAA1,SCD,SDC4,SGK1,SH3BP4,SOAT1,STAT1,STAT4,TFRC,TIMP1,TNF,TNFAIP3,TNFSF4	52
Hematological System Development and Function, Tissue Development	Accumulation of blood cells	1.4e-18	Increased	2.773	bias	ACKR3,CCL2,CCL22,CCL3L3,CCL5,CCR7,CD274,CSF1,CSF2,CSF3,CXCL10,CXCL2,DUSP1,EDN1,EZH2,FADD,ICAM1,IER3,IL10,IL12B,IL17A,IL1RN,IL23A,IL2RA,IL33,IL7,IL9,IRF1,IRF4,ITGA9,LAT,LTA,MYBL2,NOS2,NPC1,NR3C1,OSM,PIM1,PTPN1,PTX3,RGS16,S1PR1,STAT1,STAT5A,THBD,TIMP1,TNF,TNFRSF21,TNFRSF25,TNFSF4	50
Cell-mediated Immune Response, Cellular Development, Cellular Function and Maintenance, Cellular Growth and Proliferation, Embryonic Development, Hematological System Development and Function, Hematopoiesis, Lymphoid Tissue Structure and Development, Organ Development, Organismal Development, Tissue Development	Differentiation of T lymphocytes	1.99e-18	Increased	3.635	bias	ADA,AFF1,BATF,BHLHE40,CBLB,CCL5,CD274,CD83,CDK6,CFLAR,CISH,CSF2,DLL1,DLL4,EFNB2,EZH2,FADD,GADD45B,GADD45G,HS1BP3,ICAM1,ID2,IL10,IL12B,IL12RB2,IL17A,IL23A,IL27,IL27RA,IL2RA,IL7,IL7R,IL9,IRF1,IRF4,ITGB8,ITPKC,JAG1,KLF4,LAT,LIF,MARCH1,NOS2,PNP,PTGS2,RHOH,RNF128,RSAD2,RUNX2,S1PR1,SMAD3,SOCS3,STAT1,STAT4,STAT5A,TBX21,TNF,TNFAIP3,TNFSF4,TOX	60
Inflammatory Disease	Chronic inflammatory disorder	2.16e-18		1.044		ABCA1,ADA,ADAM9,ADAMTS4,AMPD1,ARAP2,ATIC,ATP8A1,BLNK,C3orf62,C9orf72,CCL2,CCL20,CCL22,CCL4,CCL5,CCL8,CCR7,CD274,CD33,CD83,CDA,CDK6,CEMIP,CFB,CHI3L1,CSF1,CSF2,CSF2RB,CSF3,CTSB,CTSL,CXCL10,CXCL2,CYP3A4,DDX25,DUSP1,DUSP2,EDN1,EPAS1,F11R,FLT3,G0S2,GADD45B,GBP2,GBP6,GLUL,GRAMD1A,GUSB,HEXA,HMGCR,HRH1,HSD11B1,ICAM1,IDO1,IL10,IL12B,IL17A,IL18BP,IL1RN,IL23A,IL27RA,IL2RA,IL33,IL36G,IL7,IL7R,IL9,ITGB3,ITPR1…	120
Cancer, Organismal Injury and Abnormalities	Advanced neoplasia	2.29e-18	Increased	2.543		ABCA1,ACKR3,ADAM9,ADGRF5,ATF3,ATIC,ATP8B1,CCL2,CCL5,CCL8,CCR7,CD274,CD48,CD9,CDCP1,CDK6,CEMIP,CFLAR,CLDN4,CSF1,CSF2,CSF2RB,CSF3,CTSB,CTSZ,CTTN,CXCL2,CYP3A4,DUSP4,EBI3,EDN1,EPAS1,EZH2,EZR,FABP5,FADD,FLT3,GADD45A,GLUL,HMGCR,HPSE,HRH1,HSD11B1,HUNK,ICAM1,ID2,IDO1,IL17A,IL18BP,IL1RN,IL23A,IL2RA,IL33,IL7,INHBA,IRF1,ITGA9,ITGAV,ITGB3,JAG1,KCNJ2,KLF4,LGALS3,LGALS8,LOXL2,LTA,MET,MLPH,MSC,MST1R,MYBL2,NFKBI…	110
Cellular Function and Maintenance	Function of lymphatic system cells	2.56e-18		1.044	bias	ATF3,BACH2,BATF3,BHLHE40,BIRC3,CBLB,CCR7,CD274,CHI3L1,CSF2RB,CXCL10,DUSP1,EBI3,GADD45B,GADD45G,GIMAP4,ICAM1,IL10,IL12B,IL12RB2,IL23A,IL27,IL27RA,IL2RA,IL33,IL7,IL9,IRF1,LAT,LTA,NFIL3,NOD2,NOS2,NPC2,PLXNA1,PNP,PTPN13,RGS16,RNF128,S1PR1,SERPINB9,SLAMF1,SMAD3,STAT1,STAT4,STAT5A,TBX21,TGM2,TNF,TNFRSF18,TNFRSF21,TOB1,UBD	53
Cellular Growth and Proliferation	Colony formation	2.66e-18		1.085		ACKR3,ATF3,ATIC,BACH2,BAMBI,CBLB,CCL2,CCL3L3,CCL4,CCR7,CD9,CDA,CLDN4,CNDP2,CRLF2,CSF1,CSF2,CSF2RB,CSF3,CTSB,CXCL10,DOT1L,DUSP5,EDN1,EHF,EPAS1,EZR,FADD,FLT3,FRMD6,GADD45A,GADD45B,GADD45G,GDNF,HMGCR,HPSE,IFIH1,IFIT2,IGFBP3,IL10,IL17A,IL1RN,IL7,KLF4,LGALS3,LIF,MCF2L,MET,MGLL,MLLT6,MST1R,NFIL3,NR3C1,NUPR1,OLFM4,PIM1,PLK3,PPP1R15A,PTGS2,PTPN1,PTTG1,PTX3,RHOB,RHOC,RUNX2,SFN,STAT5A,STEAP2,TGM2,THRA,TIAM…	76
Cancer, Organismal Injury and Abnormalities	Metastasis	4.15e-18	Increased	2.543		ABCA1,ACKR3,ADAM9,ADGRF5,ATF3,ATIC,CCL2,CCL5,CCL8,CCR7,CD274,CD48,CD9,CDCP1,CDK6,CEMIP,CFLAR,CLDN4,CSF1,CSF2,CSF2RB,CSF3,CTSB,CTSZ,CTTN,CXCL2,CYP3A4,DUSP4,EBI3,EDN1,EPAS1,EZH2,EZR,FABP5,FADD,FLT3,GADD45A,GLUL,HPSE,HRH1,HUNK,ICAM1,ID2,IDO1,IL18BP,IL1RN,IL23A,IL2RA,IL33,IL7,INHBA,IRF1,ITGA9,ITGAV,ITGB3,JAG1,KCNJ2,LGALS3,LGALS8,LOXL2,LTA,MET,MLPH,MSC,MST1R,NFKBIB,NOS2,NR3C1,NRP2,NTN1,PARP3,PDE10A,PE…	101
Cellular Movement, Hematological System Development and Function, Immune Cell Trafficking	Cell movement of mononuclear leukocytes	5.04e-18	Increased	4.881	bias	ABCA1,ACKR3,BACH2,BATF,CBLB,CCL2,CCL20,CCL22,CCL3L3,CCL4,CCL5,CCL8,CCR7,CD274,CD48,CSF2,CSF3,CXCL10,EFNB2,EZR,F11R,FABP5,GJB2,ICAM1,IL10,IL12B,IL17A,IL18BP,IL23A,IL2RA,IL33,IL7,IL7R,IL9,INHBA,ITGA9,ITGAV,ITGB3,LAT,LGALS3,LTA,NFIL3,NFKBIZ,NOS2,NR3C1,NTN1,OLFM4,OSM,PECAM1,PELI1,PRNP,PTGS2,RGS16,S1PR1,S1PR5,SAA1,SMAD3,SOCS3,STAT1,STAT5A,TGM2,TIAM1,TIMP1,TNF,TNFRSF21,TNFSF18,TNFSF4,ZC3H12A	68
Cancer, Organismal Injury and Abnormalities	Neoplasia of epithelial tissue	5.1e-18		1.138		ABCA1,ABCA9,ABCB5,ABHD2,ABTB2,ACBD7,ACSL4,ADA,ADAM9,ADAMTS4,ADAMTS5,ADHFE1,AFF1,AGAP3,AGO2,AGPAT4,AGRN,AKAP6,ALAS1,ALS2CL,AMDHD2,AMPD1,ANKRD28,ANKRD33,ANKRD33B,ANO8,AP4S1,APOBEC3A,APOLD1,ARAP2,ARG2,ARHGAP28,ARHGAP35,ARHGEF16,ARHGEF3,ARID5A,ARL11,ARL5B,ATIC,ATP1A1,ATP6AP2,ATP6V0D1,ATP6V1B2,ATP8A1,ATP8B1,AXDND1,B4GALT5,B4GALT6,BACH2,BAMBI,BATF,BBS10,BBS2,BFAR,BHLHE40,BID,BLNK,BOC,BTBD19,BTD,C15orf5…	596
Cell Death and Survival	Cell death of lymphocytes	5.43e-18		-0.026		ADA,BID,BLNK,CCDC86,CCL4,CCL5,CD274,CD9,CFLAR,CHI3L1,CSF1,CSF2,CSF3,CTSB,CXCL10,DLL4,DRAM1,DUSP4,DUSP5,EZR,FADD,GADD45B,GIMAP4,ICAM1,ID2,IDO1,IER3,IL10,IL27,IL2RA,IL7,IL7R,IL9,IRF4,ITPR1,LAT,LGALS3,MET,NFKBIB,NOS2,NR3C1,PECAM1,PNP,PPARA,RHOH,S1PR1,SERPINB9,SFN,SMAD3,STAT1,STAT5A,TBX21,TGM2,TIMP1,TNF,TNFRSF18,TNFRSF21,TNFRSF25,UBD	59
Cellular Function and Maintenance, Hematological System Development and Function	Function of T lymphocytes	6.05e-18		0.178	bias	ATF3,BATF3,BHLHE40,BIRC3,CBLB,CCR7,CD274,CHI3L1,CSF2RB,CXCL10,DUSP1,EBI3,GADD45B,GADD45G,GIMAP4,ICAM1,IL10,IL12B,IL23A,IL27,IL27RA,IL2RA,IL33,IL7,IL9,LAT,NOD2,NOS2,NPC2,PLXNA1,PNP,PTPN13,RGS16,RNF128,S1PR1,SERPINB9,SLAMF1,SMAD3,STAT4,STAT5A,TBX21,TGM2,TNF,TNFRSF18,TNFRSF21,TOB1	46
Cancer, Organismal Injury and Abnormalities	Advanced malignant tumor	6.23e-18	Increased	2.543		ABCA1,ACKR3,ADAM9,ADGRF5,ATF3,ATIC,ATP8B1,CCL2,CCL5,CCL8,CCR7,CD274,CD48,CD9,CDCP1,CDK6,CEMIP,CFLAR,CLDN4,CSF1,CSF2,CSF2RB,CSF3,CTSB,CTSZ,CTTN,CXCL2,CYP3A4,DUSP4,EBI3,EDN1,EPAS1,EZH2,EZR,FABP5,FADD,FLT3,GADD45A,GLUL,HMGCR,HPSE,HRH1,HSD11B1,HUNK,ICAM1,ID2,IDO1,IL17A,IL18BP,IL1RN,IL23A,IL2RA,IL33,IL7,INHBA,IRF1,ITGA9,ITGAV,ITGB3,JAG1,KCNJ2,KLF4,LGALS3,LGALS8,LOXL2,LTA,MET,MLPH,MSC,MST1R,MYBL2,NFKBI…	109
Hematological System Development and Function, Tissue Morphology	Quantity of myeloid cells	6.42e-18		0.866		ABCA1,ADA,ATF3,BID,BIRC3,CCL2,CCL22,CCL3L3,CD9,CDK6,CISH,CSF1,CSF2,CSF2RB,CSF3,CTSB,CXCL10,CXCL2,DUSP1,DUSP5,EZH2,FADD,GAB2,GADD45A,GPR68,HPSE,HSD11B1,ICAM1,IGFBP3,IL10,IL12B,IL12RB2,IL17A,IL18BP,IL23A,IL2RA,IL33,IL9,ITGB3,ITPR1,LGALS3,LIF,MYBL2,NEDD4L,NFKBIB,NOD2,NOS2,NPC1,PECAM1,PIM1,PLA2G15,PTGS2,RUNX2,S1PR5,SMAD3,SOAT1,SOCS3,STAT4,STAT5A,TBX21,TGM2,THBD,THRA,TIMP1,TNF,TNFAIP3,TNFRSF25,USP2	68
Immunological Disease	Hypersensitive reaction	7.34e-18		1.518	bias	ABCA1,CCL2,CCL20,CCL22,CCL3L3,CCL4,CCL5,CCR7,CD83,CISH,CSF2,CSF2RB,CTSL,CXCL10,DUSP1,DUSP2,F11R,FABP5,FADS2,GAB2,GADD45A,GADD45G,HRH1,ICAM1,IDO1,IL10,IL12B,IL17A,IL1RN,IL27,IL27RA,IL2RA,IL33,IL9,LAPTM5,LAT,LIF,LTA,MST1R,MXI1,NFKBIZ,NOS2,NR3C1,OPTN,OSM,PECAM1,PLA2G4A,PPARA,PPP3CC,PTGES2,PTGIR,PTGS2,S100A2,SDC1,STAT1,TGM3,THBD,TIMP1,TNF,TNFAIP3,TNFSF4,TUBB1,ZNF331	63
Cell-To-Cell Signaling and Interaction, Hematological System Development and Function	Interaction of leukocytes	1.04e-17	Increased	4.506	bias	ADAM9,CBLB,CCL2,CCL20,CCL22,CCL3L3,CCL4,CCL5,CCR7,CD48,CD83,CD9,CSF1,CSF2,CSF2RB,CTSZ,CTTN,CXCL10,CXCL2,DCSTAMP,DLL1,EZR,F11R,GAB2,HPSE,ICAM1,IL10,IL17A,IL33,IL7,IL7R,ITGB3,LGALS3,LIF,LTA,LTB4R,MRAS,MRC1,NFKBIB,NOS2,NR3C1,NTN1,OSM,P2RY8,PECAM1,PLTP,PTGS2,RGS16,RHOB,SAA1,SDC4,STAT1,STX4,TFRC,TGM2,THBD,TNF,TRPV2,ULBP3	59
Cardiovascular Disease, Organismal Injury and Abnormalities	Atherosclerosis	1.31e-17		1.438		ABCA1,ADA,ADGRF5,ARG2,BIRC3,CCL2,CCL3L3,CDCP1,CHI3L1,CSF1,CSF2,CXCL10,CXCL2,CYP27A1,EDN1,FABP5,FLT3,GRK4,HCAR3,HMGCR,ICAM1,IL10,IL17A,IL1RN,IL33,ITGAV,ITGB3,KLF4,LGALS3,LTA,LTB4R,MCF2L,MICAL2,NOS2,NPC1,NR3C1,PDE10A,PDE7A,PECAM1,PLA2G15,PLTP,PPARA,PPP3CC,PTGIR,PTGS2,PTX3,RSAD2,RUNX2,S1PR1,SAA1,SAMD4A,SCD,SDC4,SIGMAR1,SMAD3,SOAT1,SOCS3,STAT5A,TBX21,THBD,THRA,TIMP1,TNF,TNFAIP3,TNFRSF25,TNFSF15,TNFSF…	69
Hematological System Development and Function, Immune Cell Trafficking, Inflammatory Response, Tissue Development	Accumulation of leukocytes	1.32e-17	Increased	3.042	bias	ACKR3,CCL2,CCL22,CCL3L3,CCL5,CCR7,CD274,CSF1,CSF2,CSF3,CXCL10,CXCL2,DUSP1,EDN1,EZH2,ICAM1,IER3,IL10,IL12B,IL17A,IL1RN,IL23A,IL2RA,IL33,IL7,IL9,IRF1,IRF4,ITGA9,LAT,LTA,NOS2,NPC1,NR3C1,OSM,PTPN1,PTX3,RGS16,S1PR1,STAT1,STAT5A,THBD,TIMP1,TNF,TNFRSF21,TNFRSF25,TNFSF4	47
Cell Morphology	Morphology of cells	1.36e-17				ABCA1,ADA,ADAMTS4,ADGRF5,AFF1,AGRN,ARHGAP35,ATF3,ATP6V1B2,BACH2,BATF,BBS10,BBS2,BHLHE40,BID,BLNK,BTBD19,CBLB,CCDC86,CCK,CCL2,CD274,CD9,CDCP1,CDH23,CDK6,CFLAR,CHI3L1,CHST15,CISH,CLCN6,CNTFR,CREB3L1,CSF1,CSF2,CSF3,CTSA,CTSB,CTSK,CTSZ,CTTN,CXCL10,CYP27A1,DDX25,DGAT2,DOT1L,DUSP1,DUSP5,EBI3,ECE1,EDN1,EFNB2,EPAS1,EPB41L2,EZR,F11R,FADD,FADS2,FAM20A,FERMT2,Foxp1,G0S2,GAB1,GAB2,GADD45A,GAL,GDNF,GEM,HEXA,H…	188
Cancer, Organismal Injury and Abnormalities	Carcinoma	1.42e-17		1.147		ABCA1,ABCA9,ABCB5,ABHD2,ABTB2,ACBD7,ACSL4,ADA,ADAM9,ADAMTS4,ADAMTS5,ADHFE1,AFF1,AGAP3,AGO2,AGPAT4,AGRN,AKAP6,ALAS1,ALS2CL,AMDHD2,AMPD1,ANKRD28,ANKRD33,ANKRD33B,ANO8,AP4S1,APOBEC3A,APOLD1,ARAP2,ARG2,ARHGAP28,ARHGAP35,ARHGEF16,ARHGEF3,ARID5A,ARL11,ARL5B,ATIC,ATP1A1,ATP6AP2,ATP6V0D1,ATP6V1B2,ATP8A1,ATP8B1,AXDND1,B4GALT5,B4GALT6,BACH2,BAMBI,BATF,BBS10,BBS2,BFAR,BHLHE40,BID,BLNK,BOC,BTBD19,BTD,C15orf5…	593
Cardiovascular System Development and Function, Organismal Development	Vasculogenesis	1.47e-17	Increased	4.045	bias	ADA,ADAM9,AP4S1,ATF3,CCL2,CCR7,CD9,CFB,CSF1,CSF2,CSF2RB,CSF3,CTSB,CXCL10,CXCL2,DLL1,DLL4,ECE1,EDN1,EFNB2,EPAS1,F11R,FERMT2,FZD4,GAB1,GADD45A,GDNF,GEM,GJA5,HPSE,HRH1,ICAM1,IGFBP3,IL10,IL17A,IL18BP,IL19,IL1RN,IL33,INHBA,ITGA9,ITGAV,ITGB3,ITGB8,JAG1,KCNJ2,LGALS3,LIF,LOXL2,LTB4R,MCF2L,MET,MST1R,NEU1,NFKBIB,NOS2,NR3C1,NRP2,NTN1,OSM,PECAM1,PIM1,PLA2G4A,PPARA,PRKX,PTGIR,PTGS2,PTPN1,PTX3,RAB9A,RHOB,RND1,…	92
Infectious Diseases	Infection of mammalia	2.12e-17	Decreased	-4.187	bias	BATF3,CCL3L3,CCR7,CD274,CSF2,CSF2RB,CSF3,CXCL10,DUSP1,DUSP4,EBI3,GAB2,GBP2,IFIH1,IFIT2,IL10,IL12B,IL12RB2,IL17A,IL1RN,IL23A,IL27RA,IL33,IL9,IRF1,IRF4,ISG15,LGALS3,LTA,MST1R,NFKBIZ,NOD2,NOS2,OLFM4,OPTN,PRNP,PTPN13,PTX3,RGS16,SDC1,SERPINB9,SFN,SLAMF1,SLAMF8,SLC15A4,SMAD3,STAT1,STAT4,TBX21,TIMP1,TNF,TRPV2,UBD	53
Cell-To-Cell Signaling and Interaction, Hematological System Development and Function	Binding of leukocytes	2.34e-17	Increased	4.502	bias	ADAM9,CBLB,CCL2,CCL20,CCL22,CCL3L3,CCL4,CCL5,CCR7,CD48,CD83,CD9,CSF1,CSF2,CSF2RB,CTSZ,CTTN,CXCL10,CXCL2,DCSTAMP,DLL1,EZR,F11R,GAB2,HPSE,ICAM1,IL10,IL17A,IL33,IL7,IL7R,ITGB3,LGALS3,LIF,LTA,LTB4R,MRAS,MRC1,NFKBIB,NOS2,NR3C1,NTN1,OSM,P2RY8,PECAM1,PLTP,PTGS2,RGS16,RHOB,SDC4,STAT1,STX4,TFRC,TGM2,THBD,TNF,TRPV2,ULBP3	58
Tissue Development	Accumulation of cells	2.35e-17	Increased	2.872		ACKR3,BID,CCL2,CCL22,CCL3L3,CCL5,CCR7,CD274,CSF1,CSF2,CSF3,CXCL10,CXCL2,DOT1L,DUSP1,EDN1,EZH2,FADD,ICAM1,IER3,IL10,IL12B,IL17A,IL1RN,IL23A,IL2RA,IL33,IL7,IL9,IRF1,IRF4,ITGA9,LAT,LTA,MYBL2,NOS2,NPC1,NR3C1,OSM,PIM1,PTPN1,PTX3,RGS16,RHOB,S1PR1,STAT1,STAT5A,THBD,TIMP1,TNF,TNFRSF21,TNFRSF25,TNFSF4	53
Cell Death and Survival	Cell death of lymphatic system cells	2.36e-17		-0.463		ADA,BID,BLNK,CCDC86,CCL4,CCL5,CD274,CD9,CFLAR,CHI3L1,CSF1,CSF2,CSF3,CTSB,CXCL10,DLL4,DRAM1,DUSP4,DUSP5,EZR,FADD,GADD45A,GADD45B,GIMAP4,ICAM1,ID2,IDO1,IER3,IL10,IL27,IL2RA,IL7,IL7R,IL9,IRF4,ITPR1,LAT,LGALS3,MET,NFKBIB,NOS2,NR3C1,PECAM1,PIM1,PNP,PPARA,RHOH,S1PR1,SERPINB9,SFN,SMAD3,STAT1,STAT5A,TBX21,TGM2,TIMP1,TNF,TNFRSF18,TNFRSF21,TNFRSF25,UBD	61
Cell-To-Cell Signaling and Interaction, Hematological System Development and Function, Immune Cell Trafficking	Adhesion of immune cells	3.04e-17	Increased	4.263	bias	ADAM9,CBLB,CCL2,CCL20,CCL22,CCL3L3,CCL4,CCL5,CCR7,CD48,CD83,CD9,CSF1,CSF2,CSF2RB,CTSZ,CTTN,CXCL10,CXCL2,DCSTAMP,EZR,F11R,GAB2,HPSE,ICAM1,IL10,IL17A,IL33,IL7,IL7R,ITGB3,LGALS3,LIF,LTA,LTB4R,MRAS,MRC1,NFKBIB,NOS2,NR3C1,NTN1,OSM,P2RY8,PECAM1,PLTP,PTGS2,RGS16,RHOB,SDC4,STAT1,STX4,TGM2,THBD,TNF,TRPV2	55
Cell Death and Survival	Apoptosis of mononuclear leukocytes	4.06e-17		-0.373		ADA,BID,BLNK,CCDC86,CCL4,CCL5,CD274,CD9,CFLAR,CHI3L1,CSF1,CSF2,DLL1,DLL4,DUSP4,DUSP5,EZR,FADD,FLT3,GADD45B,GIMAP4,ICAM1,IDO1,IER3,IL10,IL19,IL27,IL2RA,IL7,IL7R,IRF4,ITPR1,KLF4,LGALS3,LGALS8,MET,NFKBIB,NOS2,NR3C1,PECAM1,PNP,PPARA,RHOH,S1PR1,SERPINB9,SFN,SMAD3,STAT1,STAT5A,TIMP1,TNF,TNFRSF18,TNFRSF21,TNFRSF25,UBD	55
Cell-To-Cell Signaling and Interaction, Hematological System Development and Function, Immune Cell Trafficking, Inflammatory Response	Activation of phagocytes	5.12e-17	Increased	5.15	bias	ADAM9,ADGRF5,ATF3,BID,CCL2,CCL22,CCL4,CCL5,CCL8,CCR7,CD48,CHI3L1,CSF1,CSF2,CSF3,CXCL10,EDN1,GDNF,HPSE,HRH1,HSD11B1,ICAM1,IDO1,IL10,IL17A,IL19,IL1RN,IL23A,IL27,IL27RA,IL33,IL7,IL9,INHBA,ITGAV,KLF4,LGALS3,LTA,LTB4R,MET,MST1R,NFIL3,NOS2,NPC1,OSM,PELI1,PPARA,PRNP,PTGS2,RHOH,SAA1,STAT1,STAT4,TBX21,TGM2,TNF	56
Hematological Disease, Immunological Disease	T-cell lymphoproliferative disorder	5.34e-17				ADA,CBLB,CCL2,CCL20,CCL22,CCL8,CCR7,CD33,CFLAR,COL27A1,CXCL10,DUSP2,DUSP4,DUSP5,EBI3,EFNB2,EPAS1,EZH2,FERMT2,FLT3,GADD45A,GADD45B,GBP2,HS3ST1,ID2,IDO1,IER3,IFIT2,IFIT3,IL2RA,IL33,IL7R,IL9,IRF4,ISG15,ISG20,ITGA9,ITM2C,LAT,LIF,LPAR1,MET,MST1R,MXI1,MYLIP,NEDD4L,NR3C1,PIM1,PPP3CC,RASSF4,RGS16,RHOB,RHOH,RHOV,ROS1,RSAD2,S1PR1,SDC1,SLAMF8,STAT1,STAT4,TBX21,THBD,TIMP1,TNFAIP3,TNFRSF21,TOB1,TOX,TRIM25,TUB…	72
Cancer, Hematological Disease, Immunological Disease, Organismal Injury and Abnormalities	Neoplasia of leukocytes	5.44e-17		0.391	bias	ADA,BID,CBLB,CCL2,CCL20,CCL22,CCL8,CCR7,CD33,CFLAR,COL27A1,CXCL10,DUSP2,DUSP4,DUSP5,EBI3,EFNB2,EPAS1,EZH2,FERMT2,FLT3,GADD45A,GADD45B,GBP2,HS3ST1,ID2,IDO1,IER3,IFIT2,IFIT3,IL27RA,IL2RA,IL33,IL7R,IL9,IRF4,ISG15,ISG20,ITGA9,ITM2C,LIF,LPAR1,MET,MST1R,MXI1,MYLIP,NEDD4L,NR3C1,PIM1,PPP3CC,RASSF4,RGS16,RHOB,RHOH,RHOV,ROS1,RSAD2,S1PR1,SDC1,SLAMF8,STAT1,STAT4,TBX21,THBD,TIMP1,TNFAIP3,TNFRSF21,TOB1,TOX,TRI…	73
Cellular Movement, Hematological System Development and Function, Immune Cell Trafficking	Cell movement of antigen presenting cells	5.95e-17	Increased	3.825	bias	BID,CCL2,CCL20,CCL22,CCL3L3,CCL4,CCL5,CCR7,CSF1,CSF2,CTSZ,CXCL10,EDN1,EPAS1,HPSE,HRH1,ICAM1,IL10,IL12B,IL17A,IL1RN,IL33,ITGAV,ITGB3,LGALS3,LTA,LTB4R,NOS2,NPC1,NRP2,NTN1,P2RY6,PLA2G4A,PLTP,PPP1R15A,PRNP,PTGS2,PTPN1,PTX3,RHOB,S1PR1,SAA1,SDC1,SLAMF1,SLAMF8,SMAD3,STAT1,THBD,TIMP1,TNF,TNFAIP3,TNFRSF21,TNFSF18,TNFSF4,TRPV2	55
Cardiovascular System Development and Function	Development of vasculature	6.12e-17	Increased	4.022	bias	ACKR3,ADA,ADAM9,AP4S1,ATF3,CCL2,CCL5,CCR7,CD9,CDON,CFB,CHI3L1,CSF1,CSF2,CSF2RB,CSF3,CTSB,CTTN,CXCL10,CXCL2,DLL1,DLL4,ECE1,EDN1,EFNB2,EPAS1,ESM1,F11R,FERMT2,FZD4,GAB1,GAB2,GADD45A,GDNF,GEM,GJA5,GJB2,HMOX2,HPSE,HRH1,HSPB1,ICAM1,IGFBP3,IL10,IL17A,IL18BP,IL19,IL1RN,IL27,IL33,INHBA,ITGA9,ITGAV,ITGB3,ITGB8,JAG1,KCNJ2,LGALS3,LGALS8,LIF,LOXL2,LTB4R,MCF2L,MET,MST1R,NEU1,NFKBIB,NOS2,NPC2,NR3C1,NRP2,NTN1,OS…	113
Cell Death and Survival, Organismal Injury and Abnormalities	Necrosis of epithelial tissue	6.28e-17		0.81		ARG2,ATF3,BID,BIRC3,CCK,CDK6,CDON,CFLAR,CSF3,CTSB,CXCL10,EDN1,EFNB2,FADD,GADD45A,GADD45B,HMOX2,HSPB1,ICAM1,ID2,IER3,IGFBP3,IL10,IL17A,IL1RN,IL2RA,IL33,INHBA,IRF1,IRF4,ITGAV,ITIH4,KLF4,MET,MLKL,NFKBIB,NOS2,NR3C1,NTN1,OSM,PECAM1,PIM1,PLA2G4A,PLK3,PMP22,PPARA,PPP1R15A,PRDX6,PRNP,PTGS2,PTPN1,RASSF4,RHOB,RUNX2,S1PR1,SAA1,SCD,SEMA7A,SGK1,SMAD3,SOCS3,SPNS1,STAT1,TFRC,TGM2,THBD,TIAM1,TIMP1,TNF,TNFAIP3,TN…	76
Cell-To-Cell Signaling and Interaction	Adhesion of blood cells	6.31e-17	Increased	4.13	bias	ADAM9,CBLB,CCL2,CCL20,CCL22,CCL3L3,CCL4,CCL5,CCR7,CD48,CD83,CD9,CSF1,CSF2,CSF2RB,CTSZ,CTTN,CXCL10,CXCL2,DCSTAMP,EZR,F11R,GAB2,HPSE,ICAM1,IL10,IL17A,IL33,IL7,IL7R,ITGB3,LGALS3,LIF,LTA,LTB4R,MRAS,MRC1,NFKBIB,NOS2,NR3C1,NTN1,OSM,P2RY8,PECAM1,PLTP,PTGS2,PTX3,RGS16,RHOB,SAA1,SDC4,STAT1,STX4,TGM2,THBD,TNF,TRPV2	57
Cell Death and Survival, Gastrointestinal Disease, Hepatic System Disease, Organismal Injury and Abnormalities	Cell death of liver cells	6.51e-17		1.733		BID,BIRC3,CD274,CFLAR,CTSB,CXCL10,DUSP4,FADD,GADD45B,IER3,IL10,IL17A,IL1RN,IL27RA,IL2RA,IL33,INHBA,IRF1,ITGAV,ITGB3,ITIH4,MET,NFKBIB,NOS2,NPC1,OSM,PPARA,PTGS2,PTPN1,SAA1,SCD,SMAD3,SOCS3,STAT1,TIMP1,TNF,UGCG,USP2,VASN	39
Cancer, Organismal Injury and Abnormalities	Abdominal neoplasm	6.57e-17		1.781		ABCA1,ABCA9,ABCB5,ABHD2,ABTB2,ACBD7,ACKR3,ACSL4,ACSL5,ADA,ADAM9,ADAMTS4,ADAMTS5,ADHFE1,AFF1,AGAP3,AGO2,AGPAT4,AGRN,AKAP6,ALAS1,ALS2CL,AMPD1,ANKRD28,ANKRD33B,ANO8,AP4S1,APOBEC3A,APOLD1,ARAP2,ARG2,ARHGAP28,ARHGAP35,ARHGEF16,ARHGEF3,ARID5A,ARL11,ARL5B,ATF3,ATIC,ATP1A1,ATP6AP2,ATP6V0D1,ATP6V1B2,ATP8A1,ATP8B1,AXDND1,B4GALT5,B4GALT6,BACH2,BAMBI,BATF,BBS10,BBS2,BCAS1,BFAR,BHLHE40,BID,BIRC3,BLNK,BOC,BTBD…	589
Cardiovascular Disease, Organismal Injury and Abnormalities	Vaso-occlusion	6.76e-17		1.394		ABCA1,ADA,ADGRF5,ARG2,BIRC3,CBLB,CCL2,CCL3L3,CDCP1,CHI3L1,CSF1,CSF2,CXCL10,CXCL2,CYP27A1,EDN1,FABP5,FERMT2,FLT3,GRK4,HCAR3,HMGCR,HRH1,ICAM1,IL10,IL17A,IL1RN,IL33,ITGAV,ITGB3,KLF4,LGALS3,LTA,LTB4R,MCF2L,MICAL2,NOS2,NPC1,NR3C1,PDE10A,PDE7A,PECAM1,PLA2G15,PLA2G4A,PLTP,PPARA,PPP3CC,PTGIR,PTGS2,PTX3,RSAD2,RUNX2,S1PR1,SAA1,SAMD4A,SCD,SDC4,SIGMAR1,SMAD3,SOAT1,SOCS3,STAT5A,TBX21,THBD,THRA,TIMP1,TNF,TNFAI…	74
Cancer, Organismal Injury and Abnormalities	Abdominal cancer	7.66e-17		1.998		ABCA1,ABCA9,ABCB5,ABHD2,ABTB2,ACBD7,ACKR3,ACSL4,ACSL5,ADA,ADAM9,ADAMTS4,ADAMTS5,ADHFE1,AFF1,AGAP3,AGO2,AGPAT4,AGRN,AKAP6,ALAS1,ALS2CL,AMPD1,ANKRD28,ANKRD33B,ANO8,AP4S1,APOBEC3A,APOLD1,ARAP2,ARG2,ARHGAP28,ARHGAP35,ARHGEF16,ARHGEF3,ARID5A,ARL11,ARL5B,ATF3,ATIC,ATP1A1,ATP6AP2,ATP6V0D1,ATP6V1B2,ATP8A1,ATP8B1,AXDND1,B4GALT5,B4GALT6,BACH2,BAMBI,BATF,BBS10,BBS2,BCAS1,BFAR,BHLHE40,BID,BIRC3,BLNK,BOC,BTBD…	585
Cardiovascular Disease	Occlusion of blood vessel	1.09e-16		1.302		ABCA1,ADA,ADGRF5,ARG2,BIRC3,CBLB,CCL2,CCL3L3,CDCP1,CHI3L1,CSF1,CSF2,CXCL10,CXCL2,CYP27A1,EDN1,FABP5,FERMT2,FLT3,GRK4,HCAR3,HMGCR,HRH1,ICAM1,IL10,IL17A,IL1RN,IL33,ITGAV,ITGB3,KLF4,LGALS3,LTA,LTB4R,MCF2L,MICAL2,NOS2,NPC1,NR3C1,PDE10A,PDE7A,PECAM1,PLA2G15,PLTP,PPARA,PPP3CC,PTGIR,PTGS2,PTX3,RSAD2,RUNX2,S1PR1,SAA1,SAMD4A,SCD,SDC4,SIGMAR1,SMAD3,SOAT1,SOCS3,STAT5A,TBX21,THBD,THRA,TIMP1,TNF,TNFAIP3,TNFRS…	73
Cancer, Hematological Disease, Immunological Disease, Organismal Injury and Abnormalities	T-cell non-Hodgkin disease	1.22e-16				ADA,CCL2,CCL20,CCL22,CCL8,CCR7,CFLAR,COL27A1,CXCL10,DUSP2,DUSP4,DUSP5,EBI3,EFNB2,EPAS1,EZH2,FERMT2,GADD45A,GADD45B,HS3ST1,ID2,IDO1,IER3,IFIT2,IFIT3,IL2RA,IL33,IL9,IRF4,ISG15,ISG20,ITGA9,ITM2C,LIF,LPAR1,MET,MST1R,MXI1,MYLIP,NEDD4L,NR3C1,PIM1,PPP3CC,RASSF4,RGS16,ROS1,RSAD2,SDC1,SLAMF8,STAT1,STAT4,TBX21,THBD,TIMP1,TNFAIP3,TNFRSF21,TOB1,TOX,TRIM25,TUBA1C,TUBB1,ZNF331	62
Infectious Diseases	Viral Infection	1.32e-16	Increased	3.439	bias	A4GALT,ADA,ADAMTS5,AGO2,AMDHD2,ARID5A,ATP6AP2,ATP6V0D1,ATP6V1B2,ATP6V1G1,BIRC3,CACNG4,CBLB,CCL2,CCL20,CCL22,CCL3L3,CCL4,CCL5,CCL8,CCR7,CD164,CD274,CD48,CD9,CFLAR,CRIM1,CSF1,CSF2,CSF2RB,CTSB,CTSL,CTSZ,CXCL10,CYP3A4,DTX2,DUSP1,EBI3,EFNB2,ENC1,EPAS1,ETV3,EZH2,F11R,FADD,FAM167B,FBL,GAB1,GAB2,GLUL,GPD2,GPR146,GTF2H1,HMGCR,HRH1,HS3ST1,ICAM1,IDO1,IER3,IFIH1,IFIT2,IFIT3,IL10,IL12B,IL17A,IL1RN,IL23A,IL27,…	147
Cardiovascular System Development and Function, Organismal Development	Angiogenesis	1.36e-16	Increased	4.022	bias	ADA,ADAM9,AP4S1,ATF3,CCL2,CCL5,CCR7,CD9,CFB,CHI3L1,CSF1,CSF2,CSF2RB,CSF3,CTSB,CXCL10,CXCL2,DLL1,DLL4,ECE1,EDN1,EFNB2,EPAS1,ESM1,F11R,FERMT2,FZD4,GAB1,GAB2,GADD45A,GDNF,GEM,GJA5,HPSE,HRH1,HSPB1,ICAM1,IGFBP3,IL10,IL17A,IL18BP,IL19,IL1RN,IL27,IL33,INHBA,ITGA9,ITGAV,ITGB3,ITGB8,JAG1,KCNJ2,LGALS3,LGALS8,LIF,LOXL2,LTB4R,MCF2L,MET,MST1R,NEU1,NFKBIB,NOS2,NR3C1,NRP2,NTN1,OSM,PECAM1,PIM1,PLA2G4A,PPARA,PRKX…	103
Cardiovascular Disease, Organismal Injury and Abnormalities	Occlusion of artery	1.43e-16		1.239		ABCA1,ADA,ADGRF5,ARG2,BIRC3,CBLB,CCL2,CCL3L3,CDCP1,CHI3L1,CSF1,CSF2,CXCL10,CXCL2,CYP27A1,EDN1,FABP5,FERMT2,FLT3,GRK4,HCAR3,HMGCR,HRH1,ICAM1,IL10,IL17A,IL1RN,IL33,ITGAV,ITGB3,KLF4,LGALS3,LTA,LTB4R,MCF2L,MICAL2,NOS2,NPC1,NR3C1,PDE10A,PDE7A,PECAM1,PLA2G15,PLTP,PPARA,PPP3CC,PTGIR,PTGS2,PTX3,RSAD2,RUNX2,S1PR1,SAA1,SAMD4A,SCD,SDC4,SIGMAR1,SMAD3,SOAT1,SOCS3,STAT5A,TBX21,THBD,THRA,TIMP1,TNF,TNFAIP3,TNFRS…	72
Cellular Movement, Hematological System Development and Function, Immune Cell Trafficking	Migration of mononuclear leukocytes	1.55e-16	Increased	4.647	bias	ABCA1,ACKR3,BACH2,BATF,CBLB,CCL2,CCL20,CCL22,CCL3L3,CCL4,CCL5,CCL8,CCR7,CD274,CD48,CSF2,CSF3,CXCL10,EFNB2,EZR,F11R,FABP5,ICAM1,IL10,IL12B,IL17A,IL18BP,IL23A,IL2RA,IL7,IL7R,ITGA9,ITGAV,ITGB3,LAT,LGALS3,LTA,NFIL3,NOS2,NR3C1,NTN1,OSM,PECAM1,PELI1,PTGS2,RGS16,S1PR1,S1PR5,SAA1,SOCS3,STAT1,TGM2,TIMP1,TNF,TNFRSF21,TNFSF18,TNFSF4	57
Cancer, Hematological Disease, Organismal Injury and Abnormalities	Hematologic cancer of cells	1.74e-16				ADA,CBLB,CCL2,CCL20,CCL22,CCL8,CCR7,CD33,CFLAR,COL27A1,CXCL10,DUSP2,DUSP4,DUSP5,EBI3,EFNB2,EPAS1,EZH2,FERMT2,FLT3,GADD45A,GADD45B,GBP2,HS3ST1,ID2,IDO1,IER3,IFIT2,IFIT3,IL2RA,IL33,IL7R,IL9,IRF4,ISG15,ISG20,ITGA9,ITM2C,LIF,LPAR1,MET,MST1R,MXI1,MYLIP,NEDD4L,NR3C1,PIM1,PPP3CC,RASSF4,RGS16,RHOB,RHOH,RHOV,ROS1,RSAD2,S1PR1,SDC1,SLAMF8,STAT1,STAT4,TBX21,THBD,TIMP1,TNFAIP3,TNFRSF21,TOB1,TOX,TRIM25,TUBA1C,…	71
Lipid Metabolism, Molecular Transport, Small Molecule Biochemistry	Concentration of cholesterol	1.8e-16		-0.681		ABCA1,ADGRF5,ATP1A1,ATP8B1,CSF1,CSF2,CYP27A1,CYP3A4,DDX25,DUSP1,FABP5,GBP5,GPD2,HMGCR,HSD11B1,ICAM1,IL10,IL1RN,IL33,INSIG1,ITGB3,LGALS3,LPGAT1,MECP2,MGLL,MPC1,NEU1,NFIL3,NOS2,NPC1,NPC2,PDE10A,PLA2G15,PLAGL2,PLTP,PMP22,PPARA,PRNP,PTGS2,RAB9A,SAA1,SCD,SIGMAR1,SOAT1,TBX21,TGIF1,TGM2,THRA,TNF	49
Cellular Movement, Hematological System Development and Function, Immune Cell Trafficking	Cell movement of granulocytes	2.21e-16	Increased	2.177	bias	CCL2,CCL3L3,CCL4,CCL5,CCL8,CCR7,CD48,CFB,CSF1,CSF2,CSF3,CTSB,CTTN,CXCL10,CXCL2,DUSP1,EDN1,GJB2,HSPB1,ICAM1,IGFBP3,IL10,IL12B,IL17A,IL1RN,IL23A,IL27RA,IL2RA,IL33,IL9,ITGA9,ITGB3,LGALS3,LTB4R,MAPK12,NOD2,NOS2,NTN1,OLFM4,OSM,PECAM1,PLTP,PPARA,PTGS2,PTX3,SAA1,SGK1,SMAD3,SOCS3,TGM2,THBD,TIMP1,TNF,TNFAIP3,TNFRSF18,TRPC6	56
Cell-To-Cell Signaling and Interaction	Response of lymphatic system cells	2.31e-16	Increased	2.392	bias	ADA,BHLHE40,CBLB,CCL2,CCR7,CD274,CD48,CD83,CD9,CSF2,CSF2RB,EBI3,FADD,HSD3B7,ICAM1,IL10,IL12B,IL12RB2,IL17A,IL23A,IL27,IL27RA,IL2RA,IL33,IL7,IL7R,IL9,LIF,NFIL3,NOS2,PNP,PRNP,SMAD3,SOCS3,STAT4,STAT5A,TBX21,TNF,TNFRSF18,TNFRSF25	40
Hematological System Development and Function, Immune Cell Trafficking, Inflammatory Response, Tissue Development	Accumulation of mononuclear leukocytes	2.45e-16	Increased	3.193		CCL2,CCL22,CCL3L3,CCL5,CCR7,CD274,CSF1,CSF2,CXCL10,CXCL2,DUSP1,EDN1,EZH2,ICAM1,IER3,IL12B,IL17A,IL23A,IL2RA,IL33,IL7,IL9,LAT,LTA,NR3C1,PTPN1,RGS16,S1PR1,STAT5A,TNF,TNFRSF21,TNFRSF25,TNFSF4	33
Cellular Movement, Immune Cell Trafficking	Cell movement of lymphoid cells	2.5e-16	Increased	4.077	bias	ACKR3,BACH2,BATF,CBLB,CCL2,CCL20,CCL22,CCL3L3,CCL4,CCL5,CCL8,CCR7,CD274,CD48,CSF2,CSF2RB,CSF3,CXCL10,EZR,F11R,FABP5,GJB2,ICAM1,IL10,IL12B,IL17A,IL18BP,IL23A,IL2RA,IL7,IL7R,IL9,ITGA9,ITGAV,ITGB3,LAT,LTA,NFIL3,NOS2,NR3C1,NTN1,OSM,PECAM1,PELI1,PTGS2,RGS16,S1PR1,S1PR5,SAA1,SOCS3,STAT1,STAT5A,TGM2,TIAM1,TIMP1,TNF,TNFRSF21,TNFSF4,ZC3H12A	59
Cellular Movement, Hematological System Development and Function, Immune Cell Trafficking, Inflammatory Response	Cell movement of macrophages	2.71e-16	Increased	3.339	bias	BID,CCL2,CCL22,CCL3L3,CCL4,CCL5,CSF1,CSF2,CXCL10,EDN1,EPAS1,ICAM1,IL10,IL12B,IL17A,IL1RN,IL33,ITGB3,LGALS3,LTA,NOS2,NPC1,NTN1,P2RY6,PLA2G4A,PLTP,PPP1R15A,PRNP,PTGS2,PTPN1,PTX3,RHOB,S1PR1,SAA1,SDC1,SLAMF1,SLAMF8,SMAD3,STAT1,THBD,TNF,TNFAIP3,TNFRSF21,TNFSF18,TNFSF4,TRPV2	46
Lipid Metabolism, Molecular Transport, Small Molecule Biochemistry	Concentration of sterol	2.72e-16		-0.766		ABCA1,ADGRF5,ATP1A1,ATP8B1,CSF1,CSF2,CYP27A1,CYP27B1,CYP3A4,DDX25,DUSP1,FABP5,GBP5,GPD2,HMGCR,HSD11B1,ICAM1,IL10,IL1RN,IL33,INSIG1,ITGB3,LGALS3,LPGAT1,MECP2,MGLL,MPC1,NEU1,NFIL3,NOS2,NPC1,NPC2,PDE10A,PLA2G15,PLAGL2,PLTP,PMP22,PPARA,PRNP,PTGS2,RAB9A,SAA1,SCD,SIGMAR1,SOAT1,TBX21,TGIF1,TGM2,THRA,TNF	50
Inflammatory Response	Immune response of cells	2.83e-16	Increased	3.259	bias	ABCA1,BATF3,BHLHE40,BIRC3,CCL2,CCL22,CCR7,CD274,CD48,CD83,CSF1,CSF2,CSF2RB,CSF3,CTSB,CXCL10,FADD,GAB2,HRH1,HSPB1,ICAM1,IFIH1,IL10,IL12B,IL17A,IL19,IL23A,IL27RA,IL2RA,IL33,IL7,IL7R,IL9,IRF1,ISG15,ITGAV,ITGB3,LAT,LGALS3,LTB4R,MARCH1,MEGF10,MET,MRC1,NOD2,NOS2,NR3C1,NTN1,OSM,PECAM1,PELI1,PLA2G4A,PLXNA1,PNP,PRKX,PRNP,PTX3,SAA1,SERPINB9,SGK1,SMAD3,SOAT1,SOCS3,STAT1,STEAP2,TBX21,TGM2,THBD,TNF,TNFRSF18,T…	73
Cell-mediated Immune Response, Cellular Development, Cellular Function and Maintenance, Cellular Growth and Proliferation, Embryonic Development, Hematological System Development and Function, Hematopoiesis, Lymphoid Tissue Structure and Development, Organ Development, Organismal Development, Tissue Development	Differentiation of helper T lymphocytes	3e-16	Increased	2.943	bias	BATF,CBLB,CCL5,CD274,CFLAR,CISH,CSF2,DLL1,DLL4,EFNB2,EZH2,GADD45B,GADD45G,ICAM1,IL10,IL12B,IL12RB2,IL17A,IL23A,IL27,IL27RA,IL2RA,IL7,IL9,IRF1,IRF4,KLF4,LIF,NOS2,RSAD2,SMAD3,SOCS3,STAT1,STAT4,STAT5A,TBX21,TNF,TNFSF4	38
Lipid Metabolism, Molecular Transport, Small Molecule Biochemistry	Quantity of steroid	3.21e-16		0.215		ABCA1,ADGRF5,ATF3,ATP1A1,ATP8B1,CSF1,CSF2,CYP27A1,CYP27B1,CYP3A4,DDX25,DUSP1,EDN1,FABP5,GAL,GBP5,GPD2,HMGCR,HSD11B1,ICAM1,IL10,IL1RN,IL33,INHBA,INSIG1,ITGB3,LGALS3,LIF,LPGAT1,MECP2,MGLL,MPC1,MRC1,NEDD4L,NEU1,NFIL3,NOS2,NPC1,NPC2,NR3C1,PDE10A,PLA2G15,PLAGL2,PLTP,PMP22,PPARA,PRNP,PTGIR,PTGS2,PTPN1,PTTG1,RAB9A,SAA1,SCD,SGK1,SIGMAR1,SMAD3,SOAT1,TBX21,TGIF1,TGM2,THRA,TIMP1,TNF	64
Cellular Movement, Hematological System Development and Function, Immune Cell Trafficking, Inflammatory Response	Cellular infiltration by phagocytes	3.38e-16		1.564		BID,CCL2,CCL4,CFB,CSF1,CSF2,CSF3,CTSB,CXCL10,CXCL2,DUSP1,EDN1,GJB2,HSPB1,ICAM1,IL10,IL17A,IL1RN,IL2RA,IL33,IL9,LGALS3,LTA,LTB4R,NFKBIZ,NOS2,NPC1,NTN1,PLA2G4A,PLTP,PPP1R15A,PTGS2,PTPN1,PTX3,SAA1,SGK1,SMAD3,SOCS3,STAT1,THBD,TIMP1,TNF,TNFAIP3,TNFRSF18,TNFRSF21,TNFSF4	46
Cell-To-Cell Signaling and Interaction	Binding of blood cells	3.62e-16	Increased	4.217	bias	ADAM9,CBLB,CCL2,CCL20,CCL22,CCL3L3,CCL4,CCL5,CCR7,CD48,CD83,CD9,CSF1,CSF2,CSF2RB,CTSZ,CTTN,CXCL10,CXCL2,DCSTAMP,DLL1,EZR,F11R,GAB2,HPSE,ICAM1,IL10,IL17A,IL33,IL7,IL7R,ITGB3,LGALS3,LIF,LTA,LTB4R,MRAS,MRC1,NFKBIB,NOS2,NR3C1,NTN1,OSM,P2RY8,PECAM1,PLTP,PTGS2,PTX3,RGS16,RHOB,SAA1,SDC4,STAT1,STX4,TFRC,TGM2,THBD,TNF,TRPV2,ULBP3	60
Hematological System Development and Function, Tissue Morphology	Quantity of antigen presenting cells	3.78e-16		1.952		ABCA1,ADA,BATF3,BID,BIRC3,CCL2,CCL20,CCL22,CCR7,CD83,CSF1,CSF2,CSF3,CXCL10,FLT3,GPR68,HSD11B1,ID2,IDO1,IL10,IL12B,IL12RB2,IL1RN,IL23A,IL33,IL7R,IRF1,IRF4,ITGB3,LGALS3,LIF,LTA,NFKBIB,NOS2,NPC1,PLA2G15,SOAT1,SOCS3,STAT4,TBX21,TGM2,THBD,THRA,TNF,TNFAIP3,USP2	46
Digestive System Development and Function, Gastrointestinal Disease, Hepatic System Development and Function, Hepatic System Disease, Inflammatory Disease, Inflammatory Response, Organ Development, Organismal Injury and Abnormalities	Inflammation of liver	3.81e-16		0.197	bias	BID,BIRC3,CCL2,CCL20,CCL22,CCL3L3,CCL4,CCL5,CCL8,CCR7,CD274,CD48,CSF1,CSF2RB,CXCL10,CXCL2,CYP3A4,GBP2,HMGCR,IL10,IL12B,IL12RB2,IL17A,IL1RN,IL23A,IL27RA,IL2RA,LAT,LGALS3,LTA,NFKBIB,NOD2,NOS2,NPC1,NR3C1,PDE7A,PECAM1,PPARA,PPP3CC,SCARA5,SCD,SH3BP4,SIGMAR1,SOAT1,STAT1,STAT4,TBX21,TFRC,TIMP1,TNF,TNFAIP3,TNFRSF18	52
Gastrointestinal Disease, Hepatic System Disease, Organismal Injury and Abnormalities	Injury of liver	5.07e-16		0.941		ATP8B1,CCL2,CCL20,CCL4,CCL5,CCR7,CD274,CSF1,CSF2RB,CTSB,CXCL10,CYP3A4,EBI3,EDN1,HMGCR,IL10,IL17A,IL1RN,IL23A,IL27,IL27RA,IL2RA,INHBA,IRF1,LIF,LTA,MET,NFKBIB,NOS2,NPC1,NR3C1,OSM,PPARA,PPP3CC,SAA1,SCD,SDC4,SH3BP4,SOAT1,STAT1,STAT4,TFRC,TIMP1,TNF	44
Molecular Transport	Transport of molecule	5.64e-16	Increased	4.567	bias	ABCA1,ACSL4,ACSL5,ADA,ADAM9,ADHFE1,AGAP3,ANO8,AP4S1,ATF3,ATP1A1,ATP6V0D1,ATP6V1B2,ATP6V1G1,ATP8A1,ATP8B1,BHLHE40,CACNG4,CBLB,CCK,CCL2,CCL5,CCL8,CCR7,CDH23,CLIC3,CNTFR,CREB3L1,CSF2,CSF2RB,CTSA,CTTN,CXCL10,CXCL2,CYP27A1,CYP27B1,CYP3A4,DDX25,DENND3,EDN1,EPAS1,EZR,FABP5,FADD,FZD4,GAB1,GAL,GDNF,GIF,GJA5,GJB2,GLUL,GRASP,HMOX2,HSD11B1,IL10,IL17A,IL1RN,IL33,INHBA,ITGAV,ITGB3,ITPR1,KCNJ2,KCNK1,KCNQ5,KLF15…	145
Cellular Movement, Immune Cell Trafficking	Cell movement of lymphatic system cells	6.37e-16	Increased	4.361	bias	ACKR3,BACH2,BATF,CBLB,CCL2,CCL20,CCL22,CCL3L3,CCL4,CCL5,CCL8,CCR7,CD274,CD48,CD9,CSF2,CSF2RB,CSF3,CXCL10,EZR,F11R,FABP5,GJB2,ICAM1,IL10,IL12B,IL17A,IL18BP,IL23A,IL2RA,IL7,IL7R,IL9,ITGA9,ITGAV,ITGB3,LAT,LTA,NFIL3,NOS2,NR3C1,NTN1,OSM,PECAM1,PELI1,PTGS2,RGS16,S1PR1,S1PR5,SAA1,SOCS3,STAT1,STAT5A,TGM2,TIAM1,TIMP1,TNF,TNFRSF21,TNFSF4,ZC3H12A	60
Cell Death and Survival, Gastrointestinal Disease, Hepatic System Disease, Organismal Injury and Abnormalities	Necrosis of liver	6.39e-16		0.945		ADA,BID,BIRC3,CD274,CFLAR,CTSB,CXCL10,DUSP4,FADD,GADD45B,IER3,IL10,IL17A,IL1RN,IL27RA,IL2RA,IL33,INHBA,IRF1,ITGAV,ITGB3,ITIH4,LGALS3,LIF,MET,NFKBIB,NOS2,NPC1,OSM,PPARA,PTGS2,PTPN1,SAA1,SCD,SMAD3,SOCS3,STAT1,TIMP1,TNF,UGCG,USP2,VASN	42
Cellular Movement, Hematological System Development and Function, Immune Cell Trafficking	Cellular infiltration by granulocytes	7.47e-16		1.057		CCL4,CCL5,CCR7,CD48,CFB,CSF1,CSF2,CSF3,CTSB,CXCL10,CXCL2,DUSP1,GJB2,HSPB1,ICAM1,IL10,IL12B,IL17A,IL1RN,IL27RA,IL2RA,IL33,IL9,LGALS3,LTB4R,NOS2,NTN1,OLFM4,OSM,PLTP,PTGS2,PTX3,SGK1,SOCS3,TGM2,THBD,TIMP1,TNF,TNFAIP3,TNFRSF18	40
Cellular Movement, Hematological System Development and Function, Immune Cell Trafficking	Cell movement of lymphocytes	7.67e-16	Increased	4.196	bias	ACKR3,BACH2,BATF,CBLB,CCL2,CCL20,CCL22,CCL3L3,CCL4,CCL5,CCL8,CCR7,CD274,CD48,CSF2,CSF3,CXCL10,EZR,F11R,FABP5,GJB2,ICAM1,IL10,IL12B,IL17A,IL18BP,IL23A,IL2RA,IL7,IL7R,IL9,ITGA9,ITGAV,ITGB3,LAT,LTA,NFIL3,NOS2,NR3C1,NTN1,OSM,PECAM1,PELI1,PTGS2,RGS16,S1PR1,S1PR5,SAA1,SOCS3,STAT1,STAT5A,TGM2,TIAM1,TIMP1,TNF,TNFRSF21,TNFSF4,ZC3H12A	58
Cell Death and Survival, Organismal Injury and Abnormalities	Cell death of epithelial cells	8e-16		1.774		ATF3,BID,BIRC3,CCK,CDK6,CDON,CFLAR,CTSB,CXCL10,EDN1,EFNB2,FADD,GADD45A,GADD45B,HSPB1,ICAM1,ID2,IER3,IGFBP3,IL10,IL17A,IL1RN,IL2RA,IL33,INHBA,IRF1,IRF4,ITGAV,ITIH4,MET,MLKL,NFKBIB,NOS2,NR3C1,NTN1,OSM,PIM1,PLA2G4A,PLK3,PMP22,PPARA,PPP1R15A,PRDX6,PRNP,PTGS2,PTPN1,RASSF4,S1PR1,SAA1,SCD,SEMA7A,SGK1,SMAD3,SOCS3,SPNS1,STAT1,TFRC,TGM2,TIAM1,TIMP1,TNF,TNFRSF25,TRIB3,UGCG,USP2,VASN	66
Dermatological Diseases and Conditions, Organismal Injury and Abnormalities	Psoriasis	8.42e-16		1.092		APOBEC3A,ATP6V0D1,BLNK,CAMK2N1,CCL2,CCL20,CFLAR,CSF2,CTSB,CTSK,CTSL,CXCL10,DTX2,DUSP1,EFNB2,ELOVL5,FABP5,FADS2,G0S2,GAL,GBP2,GJB2,HERC6,HMGCR,HPSE,ICAM1,IDO1,IFIT3,IGFBP3,IL10,IL12B,IL17A,IL19,IL1RN,IL23A,IL2RA,IL33,IL36G,ISG15,ISG20,LGALS3,LTA,MECP2,NFIL3,NMI,NOS2,NR3C1,NRP2,OSM,PPARA,PPIF,PPP1R3C,PPP3CC,PTGS2,RAB38,RSAD2,S100A2,SFN,SGK1,SLAMF7,SOCS3,SPTSSA,STAT1,TCN1,TGM1,TGM3,THBD,TLE3,TNF,TNF…	71
Cell Morphology	Morphology of leukocytes	8.92e-16				ADGRF5,AFF1,BACH2,BATF,BHLHE40,BLNK,CBLB,CCDC86,CCL2,CD274,CHI3L1,CHST15,CSF1,CSF2,CTSZ,EBI3,Foxp1,HEXB,HPSE,ICAM1,ID2,IL10,IL1RN,IL2RA,IL7,IL7R,IL9,IRF1,IRF4,ITPKC,LAT,LGALS3,LIF,LTA,MARCH1,MXI1,NFIL3,NFKBIZ,NOD2,NPC2,PLA2G15,RHOH,SERPINB9,SGMS2,SOAT1,STAT5A,TBX21,TMPRSS6,TNF,TOX	50
Cellular Development, Cellular Growth and Proliferation	Cell proliferation of tumor cell lines	1.18e-15		1.795		ABCB5,ACKR3,ACSL4,ACSL5,ADAM9,ADAMTS4,ADAMTS5,AFF1,ARL11,ATF3,BID,CAMK2N1,CCL2,CCL20,CCL22,CD274,CDCP1,CDK6,CFLAR,CNDP2,CSF1,CSF2,CSF2RB,CSF3,CTSB,CTTN,CXCL10,CYP3A4,DLL1,DLL4,DUSP1,DUSP4,DUSP5,EDN1,EHF,EMILIN2,ENC1,EPAS1,EZH2,EZR,FABP5,FADD,FAM92A,FBXL2,FLT3,FRMD6,G0S2,GAB1,GAB2,GADD45A,GADD45G,GAL,GDNF,GNG4,GSDMB,HMGCR,HPSE,HSD11B1,HSPB1,ID2,IDO1,IER3,IGFBP3,IL10,IL17A,IL19,IL1RN,IL23A,IL2RA,IL…	149
Cell-To-Cell Signaling and Interaction, Hematological System Development and Function, Immune Cell Trafficking, Inflammatory Response	Activation of antigen presenting cells	1.23e-15	Increased	4.939	bias	ADGRF5,ATF3,BID,CCL2,CCL22,CCL4,CCL5,CCR7,CD48,CHI3L1,CSF1,CSF2,CSF3,CTSL,CXCL10,EDN1,FLT3,GDNF,HPSE,HRH1,ICAM1,IDO1,IL10,IL17A,IL1RN,IL23A,IL33,IL7,IL9,INHBA,IRF4,ITGAV,KLF4,LGALS3,LTA,MST1R,NFIL3,NOS2,NPC1,OSM,PELI1,PPARA,PRNP,PTGS2,STAT1,STAT4,TBX21,TGM2,TNF	49
Cellular Movement, Hematological System Development and Function, Immune Cell Trafficking	Lymphocyte migration	1.56e-15	Increased	4.122	bias	ACKR3,BACH2,BATF,CBLB,CCL2,CCL20,CCL22,CCL3L3,CCL4,CCL5,CCL8,CCR7,CD274,CD48,CSF2,CSF3,CXCL10,EZR,F11R,FABP5,ICAM1,IL10,IL12B,IL17A,IL18BP,IL23A,IL2RA,IL7,IL7R,ITGA9,ITGAV,ITGB3,LAT,LTA,NFIL3,NOS2,NR3C1,NTN1,OSM,PECAM1,PELI1,PTGS2,RGS16,S1PR1,S1PR5,SAA1,SOCS3,STAT1,TGM2,TIMP1,TNF,TNFRSF21,TNFSF4	53
Cell-To-Cell Signaling and Interaction, Hematological System Development and Function	Activation of myeloid cells	1.65e-15	Increased	4.628	bias	ADAM9,ADGRF5,ATF3,BID,CCL2,CCL22,CCL4,CCL5,CCL8,CD48,CHI3L1,CSF1,CSF2,CSF3,CXCL10,EDN1,GDNF,HPSE,HSD11B1,ICAM1,IL10,IL17A,IL19,IL1RN,IL23A,IL27,IL27RA,IL33,IL7,IL9,INHBA,ITGAV,KLF4,LGALS3,LTA,LTB4R,MET,MST1R,NFIL3,NOS2,NPC1,PELI1,PPARA,PRNP,PTGS2,RHOH,SAA1,STAT1,STAT4,TGM2,TNF	51
Cellular Development, Cellular Growth and Proliferation, Hematological System Development and Function, Hematopoiesis, Lymphoid Tissue Structure and Development, Tissue Development	Differentiation of phagocytes	2.17e-15	Increased	4.354	bias	BATF,BATF3,CCL2,CDK6,CSF1,CSF2,CSF2RB,CSF3,CXCL10,DCSTAMP,DLL1,DUSP5,FADD,FLT3,GAB2,GPR68,HRH1,ID2,IL10,IL17A,IL1RN,IL27,IL2RA,IL33,IL7,IL7R,IL9,INHBA,IRF4,ITGB3,JAG1,KLF4,LIF,LTA,NFIL3,PLA2G4A,PRKX,SOCS3,STAT1,STAT5A,TIMP1,TNF,TNFSF15,UBD	44
Cell-To-Cell Signaling and Interaction, Cellular Growth and Proliferation	Stimulation of cells	2.31e-15	Increased	4.299	bias	CCK,CCL2,CCL20,CCL22,CCL5,CD274,CD83,CSF1,CSF2,CSF3,CXCL10,EDN1,EFNB2,Foxp1,GAL,GDNF,IGFBP3,IL10,IL12B,IL17A,IL1RN,IL23A,IL27,IL27RA,IL33,IL7,IL9,INHBA,KCNJ2,KLF4,LGALS3,LGALS8,LIF,LTA,MYBL2,NOS2,OSM,PTGS2,RUNX2,SLAMF1,SMAD3,STEAP1,TNF,TNFAIP3,TNFRSF18,TNFRSF25,TNFSF15	47
Cell-To-Cell Signaling and Interaction, Hematological System Development and Function	Response of lymphocytes	2.35e-15	Increased	2.403	bias	ADA,BHLHE40,CBLB,CCL2,CD274,CD48,CD83,CSF2,CSF2RB,EBI3,FADD,HSD3B7,ICAM1,IL10,IL12B,IL12RB2,IL17A,IL23A,IL27,IL27RA,IL2RA,IL33,IL7,IL7R,IL9,LIF,NFIL3,NOS2,PNP,SMAD3,SOCS3,STAT4,STAT5A,TBX21,TNF,TNFRSF18,TNFRSF25	37
Cancer, Hematological Disease, Immunological Disease, Organismal Injury and Abnormalities	Non-Hodgkin disease	2.53e-15				ADA,ADAM9,ATF3,ATP6V1B2,BIRC3,CCDC86,CCL2,CCL20,CCL22,CCL8,CCR7,CD274,CD48,CDK6,CDON,CFLAR,CNTFR,COL27A1,CSF2RB,CTSL,CXCL10,DPH5,DUSP2,DUSP4,DUSP5,EBI3,EFNB2,EPAS1,EZH2,F11R,FADD,FERMT2,GADD45A,GADD45B,GBP2,GNG4,GPD2,HS3ST1,ICAM1,ID2,IDO1,IER3,IFIT2,IFIT3,IGFBP3,IL10,IL2RA,IL33,IL9,IRF4,ISG15,ISG20,ITGA9,ITGB3,ITM2C,ITPR1,LAPTM5,LCT,LIF,LPAR1,LTA,MET,MGLL,MICALCL,MST1R,MXI1,MYLIP,NEDD4L,NOS2,NR3C…	103
Cellular Movement	Invasion of cells	3.46e-15	Increased	5.402	bias	A4GALT,ACKR3,ACSL4,ADAM9,AGO2,ATF3,B4GALT5,BATF3,BHLHE40,CCL2,CCR7,CD274,CD9,CDCP1,CHI3L1,CLDN4,CNDP2,CSF1,CSF2,CSF3,CTSB,CTSK,CTSL,CTSZ,CTTN,CXCL10,DRAM1,DUSP1,ECE1,EDN1,EPAS1,ESM1,EZH2,EZR,F11R,FABP5,FAM105A,FERMT2,GAB1,GAB2,GDNF,GEM,GNAI1,GSDMB,HPSE,ID2,IER3,IFIT2,IL17A,IL33,INHBA,ITGAV,ITGB3,ITGB8,KLF4,LGALS3,LOXL2,LPAR1,MAPK12,MET,MRAS,MST1R,NOD2,NOS2,NRP2,NTN1,OSM,PARVB,PECAM1,PPIF,PTGS2,PT…	98
Cancer, Hematological Disease, Organismal Injury and Abnormalities	Lymphocytic neoplasm	4.14e-15		-0.653	bias	ADA,ADAM9,ATF3,ATIC,ATP6V1B2,BACH2,BIRC3,BLNK,CAMK2N1,CBLB,CCDC86,CCL2,CCL20,CCL22,CCL4,CCL8,CCR7,CD274,CD33,CD48,CDC42EP2,CDK6,CDON,CFLAR,CNTFR,COL27A1,CRLF2,CSF2,CSF2RB,CTSL,CTTN,CXCL10,CXCL2,DPH5,DUSP2,DUSP4,DUSP5,EBI3,EFNB2,ENC1,EPAS1,EZH2,F11R,FADD,FAM167B,FBXL2,FERMT2,FLT3,GADD45A,GADD45B,GADD45G,GBP2,GNG4,GPD2,GPX7,HMGCR,HS3ST1,HSPB1,ICAM1,ID2,IDO1,IER3,IFIT2,IFIT3,IGFBP3,IL10,IL12RB2,IL17…	145
Organismal Survival	Survival of organism	4.41e-15		1.155	bias	A4GALT,ADAM9,AGRN,BID,BIRC3,CCL2,CCL3L3,CD274,CD48,CDA,CDK6,CFB,CSF1,CSF2,CSF2RB,CSF3,CTSB,CXCL10,CXCL2,CYP3A4,DUSP1,DUSP4,EPAS1,EZH2,FADD,FLT3,GDNF,GLUL,ICAM1,ID2,IDO1,IL10,IL12B,IL17A,IL1RN,IL23A,IL27,IL2RA,IL7,IL7R,IL9,INHBA,IRF1,ITGB3,KCTD12,LIF,LPAR1,LTA,LTB4R,NFIL3,NFKBIB,NOD2,NOS2,NPC1,NR3C1,PIM1,PLTP,PNP,PPIF,PPP1R15A,PRDX6,PRNP,PTGS2,PTPN1,PTX3,RSAD2,RUNX2,SEMA7A,SMAD3,SOCS3,SPINT1,STAT1…	84
Cancer, Hematological Disease, Immunological Disease, Organismal Injury and Abnormalities	Lymphoma	5.22e-15		0.213	bias	ADA,ADAM9,ATF3,ATIC,ATP6V1B2,BIRC3,CCDC86,CCL2,CCL20,CCL22,CCL8,CCR7,CD274,CD48,CDK6,CDON,CFLAR,CNTFR,COL27A1,CSF2,CSF2RB,CTSL,CXCL10,DPH5,DUSP2,DUSP4,DUSP5,EBI3,EFNB2,EPAS1,EZH2,F11R,FADD,FAM167B,FERMT2,GADD45A,GADD45B,GADD45G,GBP2,GNG4,GPD2,GPX7,HMGCR,HS3ST1,ICAM1,ID2,IDO1,IER3,IFIT2,IFIT3,IGFBP3,IL10,IL2RA,IL33,IL7,IL9,IRF1,IRF4,ISG15,ISG20,ITGA9,ITGB3,ITM2C,ITPR1,LAPTM5,LCT,LIF,LPAR1,LTA,MET,…	116
Cell-To-Cell Signaling and Interaction	Response of mononuclear leukocytes	5.33e-15	Increased	2.022	bias	ADA,BHLHE40,CBLB,CCL2,CCR7,CD274,CD48,CD83,CSF2,CSF2RB,EBI3,FADD,HSD3B7,ICAM1,IL10,IL12B,IL12RB2,IL17A,IL23A,IL27,IL27RA,IL2RA,IL33,IL7,IL7R,IL9,LIF,NFIL3,NOS2,OSM,PLXNA1,PNP,SMAD3,SOCS3,STAT4,STAT5A,TBX21,TNF,TNFRSF18,TNFRSF25	40
Cell Death and Survival, Gastrointestinal Disease, Hepatic System Disease, Organismal Injury and Abnormalities	Apoptosis of liver cells	5.47e-15		1.401		BID,BIRC3,CD274,CFLAR,CTSB,CXCL10,FADD,GADD45B,IL10,IL17A,INHBA,IRF1,ITGAV,ITGB3,ITIH4,MET,NFKBIB,NOS2,NPC1,OSM,PPARA,PTGS2,PTPN1,SAA1,SCD,SMAD3,SOCS3,STAT1,TIMP1,TNF,USP2,VASN	32
Cell Death and Survival	Apoptosis of lymphatic system cells	6.81e-15		-1.061		ADA,BID,BLNK,CCDC86,CCL4,CCL5,CD274,CD9,CFLAR,CHI3L1,CSF1,CSF2,CSF3,DLL4,DUSP4,DUSP5,EZR,FADD,GADD45A,GADD45B,GIMAP4,ICAM1,IDO1,IER3,IL10,IL27,IL2RA,IL7,IL7R,IRF4,ITPR1,LGALS3,MET,NFKBIB,NOS2,NR3C1,PECAM1,PIM1,PNP,PPARA,RHOH,S1PR1,SERPINB9,SFN,SMAD3,STAT1,STAT5A,TIMP1,TNF,TNFRSF18,TNFRSF21,TNFRSF25,UBD	53
Cell-To-Cell Signaling and Interaction, Inflammatory Response	Immune response of leukocytes	7.94e-15	Increased	2.043	bias	ABCA1,BATF3,BHLHE40,CCL2,CCL22,CCR7,CD274,CD48,CSF2,CSF2RB,CSF3,CXCL10,GAB2,ICAM1,IL10,IL12B,IL17A,IL23A,IL27RA,IL2RA,IL33,IL7,IL7R,IL9,ISG15,ITGB3,LGALS3,LTB4R,MARCH1,NOD2,NOS2,NR3C1,NTN1,OSM,PLXNA1,PNP,PTX3,SAA1,SERPINB9,SMAD3,SOAT1,SOCS3,TBX21,TGM2,THBD,TNF,TNFSF4,TRPV2	48
Inflammatory Response, Respiratory Disease	Inflammation of respiratory system	8.43e-15		-0.901		ADA,AGO2,ATF3,BACH2,BID,CCL2,CCL22,CCL3L3,CCL5,CD48,CFLAR,CISH,CRLF2,CSF2,CSF2RB,CXCL10,DUSP1,FLT3,HMGCR,HPSE,HRH1,ICAM1,IGFBP3,IL10,IL12B,IL17A,IL2RA,IL33,IL9,INSIG1,ITGB3,LAT,LGALS3,LTA,MGLL,NEDD4L,NFKBIZ,NOD2,NOS2,NR3C1,OSM,PLA2G4A,PPP3CC,PRDX6,PTGIR,PTGS2,RNF128,SCARA5,SELENBP1,SIGMAR1,SMAD3,STAT1,TBX21,TIMP1,TNF,TNFAIP6,TNFRSF25,TNFSF15,TNFSF4,TRAF4,TRPC6	61
Cellular Movement, Hematological System Development and Function, Immune Cell Trafficking, Inflammatory Response	Cell movement of neutrophils	1.01e-14	Increased	2.07	bias	CCL2,CCL3L3,CCL4,CCL5,CCL8,CCR7,CFB,CSF1,CSF2,CSF3,CTSB,CTTN,CXCL10,CXCL2,DUSP1,EDN1,GJB2,HSPB1,ICAM1,IL10,IL17A,IL1RN,IL23A,IL2RA,IL33,ITGA9,ITGB3,LGALS3,LTB4R,MAPK12,NOD2,NOS2,NTN1,PECAM1,PLTP,PTGS2,PTX3,SAA1,SGK1,SMAD3,SOCS3,THBD,TIMP1,TNF,TNFAIP3,TNFRSF18,TRPC6	47
Cellular Growth and Proliferation	Colony formation of cells	1.04e-14		0.867		ACKR3,ATF3,ATIC,BACH2,BAMBI,CBLB,CCL2,CCL3L3,CCL4,CD9,CDA,CLDN4,CNDP2,CRLF2,CSF1,CSF2,CSF2RB,CSF3,CTSB,DOT1L,DUSP5,EDN1,EHF,EPAS1,EZR,FADD,FLT3,FRMD6,GADD45A,GADD45B,GADD45G,GDNF,HMGCR,HPSE,IFIH1,IGFBP3,IL10,IL1RN,IL7,KLF4,LIF,MCF2L,MET,MLLT6,MST1R,NR3C1,NUPR1,PLK3,PPP1R15A,PTGS2,PTPN1,PTTG1,PTX3,RHOB,RHOC,RUNX2,SFN,STAT5A,STEAP2,TGM2,THRA,TIAM1,TNF,TRAF4,VEGFB	65
Cancer, Hematological Disease, Immunological Disease, Organismal Injury and Abnormalities	Lymphoproliferative malignancy	1.06e-14		-0.102	bias	ADA,ADAM9,ATF3,ATIC,ATP6V1B2,BACH2,BIRC3,BLNK,CAMK2N1,CBLB,CCDC86,CCL2,CCL20,CCL22,CCL4,CCL8,CCR7,CD274,CD33,CD48,CDC42EP2,CDK6,CDON,CFLAR,CNTFR,COL27A1,CRLF2,CSF2,CSF2RB,CTSL,CTTN,CXCL10,DPH5,DUSP2,DUSP4,DUSP5,EBI3,EFNB2,ENC1,EPAS1,EZH2,F11R,FADD,FAM167B,FBXL2,FERMT2,FLT3,GADD45A,GADD45B,GADD45G,GBP2,GNG4,GPD2,GPX7,HMGCR,HS3ST1,HSPB1,ICAM1,ID2,IDO1,IER3,IFIT2,IFIT3,IGFBP3,IL10,IL17A,IL2RA,IL33,I…	141
Cell-To-Cell Signaling and Interaction, Hematological System Development and Function, Immune Cell Trafficking, Inflammatory Response	Activation of macrophages	1.07e-14	Increased	4.528	bias	ADGRF5,ATF3,BID,CCL2,CCL22,CCL4,CCL5,CHI3L1,CSF1,CSF2,CSF3,CXCL10,EDN1,GDNF,HPSE,ICAM1,IL10,IL17A,IL1RN,IL23A,IL33,IL7,IL9,INHBA,ITGAV,KLF4,LGALS3,LTA,MST1R,NFIL3,NOS2,NPC1,PELI1,PPARA,PRNP,PTGS2,STAT1,STAT4,TGM2,TNF	40
Gastrointestinal Disease, Immunological Disease, Ophthalmic Disease, Organismal Injury and Abnormalities	Sjögren syndrome	1.24e-14				CCL20,CCL22,CCL3L3,CCL4,CCL5,CCR7,CSF1,CSF2,CXCL10,EDN1,GBP2,IFIH1,IFIT3,IL10,IL12B,IL17A,IL7,IRF1,LIF,NR3C1,OSM,PPP3CC,SOCS3,STAT1,STAT4,TIMP1	26
Hematological Disease, Immunological Disease	Lymphoproliferative disorder	1.67e-14		-0.788	bias	ADA,ADAM9,ATF3,ATIC,ATP6V1B2,BACH2,BIRC3,BLNK,CAMK2N1,CBLB,CCDC86,CCL2,CCL20,CCL22,CCL4,CCL8,CCR7,CD274,CD33,CD48,CDC42EP2,CDCP1,CDK6,CDON,CFLAR,CNTFR,COL27A1,CRLF2,CSF2,CSF2RB,CTSL,CTTN,CXCL10,DPH5,DUSP2,DUSP4,DUSP5,EBI3,EFNB2,ENC1,EPAS1,EZH2,F11R,FADD,FAM167B,FBXL2,FERMT2,FLT3,GADD45A,GADD45B,GADD45G,GBP2,GNG4,GPD2,GPX7,HMGCR,HS3ST1,HSPB1,ICAM1,ID2,IDO1,IER3,IFIT2,IFIT3,IGFBP3,IL10,IL17A,IL2RA,…	144
Cell Death and Survival	Cell viability of blood cells	1.74e-14	Increased	5.324	bias	ACKR3,BID,BLNK,CCL4,CCR7,CD48,CFLAR,CISH,CSF1,CSF2,CSF2RB,CSF3,DOT1L,FLT3,GAB2,GADD45A,GADD45B,ICAM1,IL10,IL17A,IL27,IL27RA,IL33,IL7,IL7R,IL9,IRF4,LAT,LGALS3,MYBL2,NFIL3,PIM1,PRDX6,SERPINB9,SMAD3,STAM,STAT1,STAT4,STAT5A,TBX21,TGM2,TMPRSS6,TNF,TNFRSF18,TNFSF15	45
Hematological System Development and Function, Lymphoid Tissue Structure and Development, Tissue Morphology	Quantity of regulatory T lymphocytes	1.96e-14	Increased	2.602	bias	BACH2,BATF,CCL4,CCL5,DLL4,EBI3,FABP5,FLT3,IL10,IL12B,IL17A,IL27RA,IL2RA,IL33,IL7,IL7R,ITGB8,LTA,MARCH1,NOS2,SAA1,STAT5A,TNF,TNFRSF25,TNFSF15,TNFSF18,TOB1	27
Cancer, Gastrointestinal Disease, Organismal Injury and Abnormalities	Digestive organ tumor	2.02e-14		1.753		ABCA1,ABCA9,ABCB5,ABHD2,ABTB2,ACKR3,ACSL4,ACSL5,ADA,ADAM9,ADAMTS4,ADAMTS5,ADHFE1,AFF1,AGAP3,AGO2,AGPAT4,AGRN,AKAP6,ALAS1,AMDHD2,AMPD1,ANKRD28,ANKRD33B,ANO8,AP4S1,APOBEC3A,APOLD1,ARAP2,ARHGAP28,ARHGAP35,ARHGEF16,ARHGEF3,ARID5A,ARL11,ARL5B,ATF3,ATIC,ATP1A1,ATP6AP2,ATP6V0D1,ATP6V1B2,ATP8A1,ATP8B1,AXDND1,B4GALT5,B4GALT6,BACH2,BAMBI,BATF,BBS10,BBS2,BCAS1,BFAR,BHLHE40,BID,BIRC3,BLNK,BOC,C15orf59,C20orf…	551
Inflammatory Response, Respiratory Disease	Inflammation of respiratory system component	2.08e-14		-0.748		ADA,AGO2,ATF3,BACH2,BID,CCL2,CCL22,CCL3L3,CCL5,CD48,CFLAR,CISH,CRLF2,CSF2,CSF2RB,CXCL10,DUSP1,FLT3,HMGCR,HPSE,HRH1,ICAM1,IGFBP3,IL10,IL12B,IL17A,IL2RA,IL33,IL9,INSIG1,ITGB3,LAT,LGALS3,LTA,MGLL,NEDD4L,NFKBIZ,NOD2,NOS2,NR3C1,OSM,PLA2G4A,PPP3CC,PRDX6,PTGIR,PTGS2,RNF128,SCARA5,SELENBP1,SIGMAR1,SMAD3,STAT1,TIMP1,TNF,TNFAIP6,TNFRSF25,TNFSF15,TNFSF4,TRAF4,TRPC6	60
Organismal Development	Abnormal morphology of body cavity	2.08e-14				ABCA1,ACKR3,ACSL4,ADA,ADAM9,ADGRF5,AGO2,ARHGAP35,ATF3,BBS10,BHLHE40,BID,BIRC3,BLNK,CCR7,CD9,CDK6,CFB,CFLAR,CISH,CRIM1,CSF1,CSF2,CSF2RB,CTSA,CTSK,CYP27A1,CYP27B1,DOT1L,DUSP1,ECE1,EDN1,EFNB2,EPAS1,FADD,FADS2,FAM20A,Foxp1,GADD45A,GADD45G,GDNF,GJA5,GPX7,HEXA,HEXB,HSD11B1,ID2,IDO1,IER3,IGFBP3,IL10,IL1RN,IL2RA,IL7,IL7R,IL9,IRF1,IRF4,ITGAV,ITGB3,ITGB8,JAG1,KLF4,KMT5C,LAT,LGALS3,LIF,LOXL2,LOXL3,LTA,MET,M…	115
Cellular Development, Cellular Growth and Proliferation, Hematological System Development and Function, Hematopoiesis, Lymphoid Tissue Structure and Development, Tissue Development	Development of phagocytes	3.06e-14	Increased	3.567	bias	ABCA1,BATF,BATF3,CCL2,CD9,CDK6,CSF1,CSF2,CSF2RB,CSF3,DCSTAMP,DLL1,FADD,FLT3,GPR68,HRH1,ID2,IFRD1,IL10,IL17A,IL1RN,IL27,IL2RA,IL33,IL7,IL7R,INHBA,IRF4,ITGB3,JAG1,KLF4,LTA,NFIL3,PRKX,STAT1,STAT5A,TNF,TNFSF15,UBD	39
Cell Morphology	Morphology of blood cells	3.27e-14				ADGRF5,AFF1,BACH2,BATF,BHLHE40,BLNK,CBLB,CCDC86,CCL2,CD274,CDK6,CHI3L1,CHST15,CSF1,CSF2,CTSZ,EBI3,Foxp1,HEXB,HPSE,ICAM1,ID2,IL10,IL1RN,IL2RA,IL7,IL7R,IL9,IRF1,IRF4,ITPKC,LAT,LGALS3,LIF,LTA,MARCH1,MXI1,NFIL3,NFKBIZ,NOD2,NPC2,PIM1,PLA2G15,PPP1R15A,RHOH,SERPINB9,SGMS2,SOAT1,STAT1,STAT5A,TBX21,TFRC,TMPRSS6,TNF,TOX,TUBB1,ZC3H12A	57
Cell-To-Cell Signaling and Interaction, Cellular Growth and Proliferation	Induction of cells	3.45e-14	Increased	3.199	bias	CD274,CD83,CSF1,CSF2,CSF3,EDN1,IL10,IL12B,IL17A,IL1RN,IL23A,IL27,IL27RA,IL33,IL7,INHBA,KLF4,LIF,MYBL2,NOS2,OSM,PTGS2,RUNX2,SMAD3,STEAP1,TNF,TNFAIP3	27
Hematological System Development and Function, Immune Cell Trafficking, Inflammatory Response, Tissue Development	Accumulation of lymphocytes	3.59e-14	Increased	3.337		CCL2,CCL22,CCL3L3,CCL5,CCR7,CD274,CXCL10,DUSP1,EZH2,ICAM1,IER3,IL12B,IL17A,IL23A,IL2RA,IL33,IL7,IL9,LAT,LTA,NR3C1,PTPN1,RGS16,S1PR1,STAT5A,TNF,TNFRSF21,TNFRSF25,TNFSF4	29
Cellular Movement, Hematological System Development and Function, Immune Cell Trafficking	Cellular infiltration by mononuclear leukocytes	4.08e-14	Increased	2.433		CBLB,CCL2,CCL22,CCL3L3,CCL4,CCR7,CD274,CSF2,CXCL10,GJB2,IL10,IL12B,IL17A,IL18BP,IL23A,IL2RA,IL33,IL7,IL9,LTA,NFKBIZ,NTN1,OLFM4,OSM,PTGS2,SAA1,SMAD3,STAT1,STAT5A,TIMP1,TNF,TNFRSF21,TNFSF4,ZC3H12A	34
Cellular Development, Cellular Growth and Proliferation, Hematological System Development and Function, Hematopoiesis, Lymphoid Tissue Structure and Development, Tissue Development	Hematopoiesis of phagocytes	4.5e-14	Increased	3.877	bias	BATF,BATF3,CCL2,CDK6,CSF1,CSF2,CSF2RB,CSF3,DCSTAMP,DLL1,FADD,FLT3,GPR68,HRH1,ID2,IL10,IL17A,IL1RN,IL27,IL2RA,IL7,IL7R,INHBA,IRF4,ITGB3,JAG1,KLF4,LTA,NFIL3,PRKX,STAT1,STAT5A,TNF,TNFSF15,UBD	35
Cancer, Organismal Injury and Abnormalities	Adenocarcinoma	4.71e-14		-1.439		ABCA1,ABCA9,ABCB5,ABHD2,ABTB2,ACBD7,ACSL4,ADA,ADAM9,ADAMTS4,ADAMTS5,ADHFE1,AFF1,AGAP3,AGO2,AGPAT4,AGRN,AKAP6,ALAS1,AMPD1,ANKRD28,ANKRD33B,ANO8,AP4S1,APOBEC3A,APOLD1,ARAP2,ARG2,ARHGAP28,ARHGAP35,ARHGEF16,ARHGEF3,ARID5A,ARL11,ARL5B,ATIC,ATP1A1,ATP6AP2,ATP6V0D1,ATP6V1B2,ATP8A1,ATP8B1,AXDND1,B4GALT5,B4GALT6,BACH2,BATF,BBS10,BBS2,BFAR,BHLHE40,BID,BLNK,BOC,BTBD19,BTD,C15orf59,C20orf96,C3orf20,C3orf62,C…	541
Cell Death and Survival	Apoptosis of lymphocytes	4.84e-14		-0.612		ADA,BID,BLNK,CCDC86,CCL4,CCL5,CD274,CD9,CFLAR,CHI3L1,CSF1,DLL4,DUSP4,DUSP5,EZR,FADD,GADD45B,GIMAP4,ICAM1,IDO1,IER3,IL10,IL27,IL2RA,IL7,IL7R,IRF4,ITPR1,LGALS3,MET,NFKBIB,NOS2,NR3C1,PECAM1,PNP,PPARA,RHOH,S1PR1,SERPINB9,SFN,SMAD3,STAT1,STAT5A,TIMP1,TNF,TNFRSF18,TNFRSF21,TNFRSF25,UBD	49
Cellular Function and Maintenance, Hematological System Development and Function	Function of myeloid cells	5.12e-14		1.305	bias	BIRC3,CCL2,CCL5,CD9,CSF1,CSF2,CSF2RB,CSF3,CXCL10,DUSP4,DUSP5,GPR68,HSPB1,ICAM1,IL10,IL12B,IL23A,IL27,IRF1,ITGB3,LGALS3,LTB4R,MST1R,NOD2,NOS2,P2RY6,PLA2G15,PLA2G4A,PTGS2,SGMS2,SIGMAR1,SLAMF1,SLAMF8,STAT1,TNF	35
Cancer, Hematological Disease, Organismal Injury and Abnormalities	Hematological neoplasia	5.35e-14		0.625		ABCA1,ABCA9,ABHD2,ACSL4,ADA,ADAM9,ADAMTS5,ARHGAP35,ATF3,ATIC,ATP6V1B2,ATP8B1,BACH2,BBS10,BCAS1,BID,BIRC3,BLNK,C20orf96,CAMK2N1,CBLB,CCDC86,CCL2,CCL20,CCL22,CCL4,CCL5,CCL8,CCR7,CD274,CD33,CD48,CDA,CDC42EP2,CDCP1,CDK6,CDON,CFAP161,CFLAR,CHST15,CLIC3,CNTFR,COL27A1,CRLF2,CSF2,CSF2RB,CSF3,CTSK,CTSL,CTTN,CXCL10,CXCL2,CYP3A4,DENND3,DLL1,DLL4,DOT1L,DPH5,DUSP2,DUSP4,DUSP5,EBI3,EDN1,EFNB2,ENC1,EPAS1,EZH2,F…	203
Cell Death and Survival, Gastrointestinal Disease, Hepatic System Disease, Organismal Injury and Abnormalities	Cell death of hepatocytes	5.65e-14	Increased	2.221		BID,BIRC3,CFLAR,CTSB,CXCL10,FADD,GADD45B,IL10,IL17A,IL1RN,IL2RA,IL33,INHBA,IRF1,ITIH4,MET,NFKBIB,NOS2,OSM,PPARA,PTGS2,PTPN1,SAA1,SCD,SMAD3,SOCS3,STAT1,TNF,UGCG,USP2,VASN	31
Cancer, Organismal Injury and Abnormalities	Growth of tumor	5.69e-14	Increased	2.677		ABCB5,ACKR3,ADAM9,ATF3,BAMBI,CCL2,CCL5,CD274,CD33,CDK6,CDON,CFLAR,CLDN4,CSF1,CSF2,CSF3,CTSB,CTSK,CTSZ,CTTN,DUSP1,EDN1,EFNB2,EHF,EPAS1,EZH2,EZR,FABP5,FADD,FLT3,FRMD6,GADD45A,GDNF,GPR68,HMGCR,ICAM1,ID2,IDO1,IGFBP3,IL10,IL12B,IL12RB2,IL17A,IL1RN,IL27,IL27RA,IL33,IL7,IL9,INHBA,IRF1,IRF4,ITGA9,ITGB3,ITGB8,JAG1,LAMTOR5,LGALS3,LIF,LOXL2,LTA,MET,MGLL,MST1R,MYBL2,NOS2,OSM,PIM1,PLA2G4A,PLK3,PTGS2,PTPN13,RA…	89
Organismal Survival	Morbidity or mortality	6.46e-14	Decreased	-10.613	bias	A4GALT,ABCA1,ACKR3,ADA,ADAM9,ADAMTS4,ADGRF5,AFF1,AGO2,AGRN,AKAP6,ARHGAP35,ARID5A,ARL8B,ATF3,ATP1A1,BFAR,BID,BIRC3,BLNK,CBLB,CCDC86,CCL2,CCL22,CCL3L3,CD274,CDA,CDCP1,CDK6,CDON,CFB,CFLAR,CLDN4,CNTFR,CRIM1,CRLF2,CSF1,CSF2,CSF3,CTSA,CTSB,CTTN,CXCL10,CXCL2,CYP3A4,DGAT2,DLL1,DLL4,DOT1L,DUSP1,ECE1,EDN1,EFNB2,EPAS1,EXT1,EZH2,FADD,FADS2,FAM20A,FBL,FERMT2,FLT3,Foxp1,GAB1,GADD45A,GDNF,GJA5,GJB2,GNAI1,GPD2,G…	193
Organismal Survival	Organismal death	7.09e-14	Decreased	-10.668	bias	A4GALT,ABCA1,ACKR3,ADA,ADAM9,ADAMTS4,ADGRF5,AFF1,AGO2,AGRN,AKAP6,ARHGAP35,ARID5A,ARL8B,ATF3,ATP1A1,BFAR,BID,BIRC3,BLNK,CBLB,CCDC86,CCL2,CCL22,CCL3L3,CD274,CDA,CDCP1,CDK6,CDON,CFB,CFLAR,CLDN4,CNTFR,CRIM1,CRLF2,CSF1,CSF2,CSF3,CTSA,CTSB,CTTN,CXCL10,CXCL2,CYP3A4,DGAT2,DLL1,DLL4,DOT1L,DUSP1,ECE1,EDN1,EFNB2,EPAS1,EXT1,EZH2,FADD,FADS2,FAM20A,FBL,FERMT2,FLT3,Foxp1,GAB1,GADD45A,GDNF,GJA5,GJB2,GNAI1,GPD2,G…	191
Cellular Function and Maintenance, Hematological System Development and Function	Function of macrophages	7.99e-14		0.747	bias	BIRC3,CCL2,CCL5,CD9,CSF1,CSF2,CXCL10,DUSP4,GPR68,HSPB1,ICAM1,IL10,IL12B,IL23A,IL27,IRF1,ITGB3,LGALS3,LTB4R,MST1R,NOD2,NOS2,P2RY6,PLA2G15,PLA2G4A,PTGS2,SGMS2,SIGMAR1,SLAMF1,SLAMF8,STAT1,TNF	32
Molecular Transport	Secretion of molecule	8.15e-14	Increased	2.847	bias	ABCA1,ACSL4,ADA,ADAM9,ATF3,ATP8B1,BHLHE40,CBLB,CCK,CCL5,CCR7,CREB3L1,CSF2,CYP27A1,CYP3A4,EDN1,EZR,FZD4,GAB1,GAL,GDNF,HSD11B1,IL10,IL17A,IL1RN,INHBA,LIF,LTBP2,MAFF,MECP2,MET,MGLL,NFIL3,NMB,NOS2,NPC2,NR3C1,OPTN,OSM,PECAM1,PLA2G4A,PLA2G4F,PLTP,PNP,PNPLA8,PPARA,PTGES2,PTGIR,PTGS2,RSAD2,S100A13,SAA1,SCD,SGK1,SGMS2,SOAT1,SOCS3,STAT1,STX1B,STX4,STXBP6,THRA,TNF,TNFSF15,TNFSF4,WFS1	66
Humoral Immune Response, Protein Synthesis	Quantity of immunoglobulin	8.43e-14		0.115		ATF3,BACH2,BATF,BHLHE40,BLNK,CCR7,CD274,CD83,CHI3L1,CRLF2,CSF2,CSF2RB,CXCL10,DUSP4,GADD45A,GADD45B,GADD45G,HEXB,HRH1,IL10,IL2RA,IL33,IL9,IRF1,IRF4,ITGB3,LGALS3,LTA,MYBL1,NFIL3,NFKBIZ,NOD2,NOS2,PTGS2,PTTG1,RNF128,RSAD2,SDC1,SFN,TBX21,TNF,TNFRSF21,TNFSF15,ZC3H12A	44
Hematological System Development and Function, Lymphoid Tissue Structure and Development, Tissue Morphology	Quantity of helper T lymphocytes	8.53e-14	Increased	2.057		ARID5A,BATF,CCL5,CD274,CHI3L1,CSF3,EBI3,FABP5,ICAM1,IL12B,IL17A,IL23A,IL9,IRF1,IRF4,ITGB8,NFIL3,NOD2,PTPN13,SAA1,SOCS3,STAT1,TBX21,TNF,TOB1	25
Humoral Immune Response, Protein Synthesis	Quantity of IgG	8.86e-14		0.665		ATF3,BACH2,BATF,BHLHE40,BLNK,CCR7,CD274,CD83,CSF2,CSF2RB,CXCL10,DUSP4,GADD45A,GADD45B,GADD45G,HRH1,IL10,IL2RA,IRF4,ITGB3,LGALS3,LTA,MYBL1,NFIL3,NOD2,NOS2,PTGS2,PTTG1,RNF128,RSAD2,SDC1,SFN,TBX21,TNF,TNFRSF21,TNFSF15,ZC3H12A	37
Cancer, Gastrointestinal Disease, Organismal Injury and Abnormalities	Digestive system cancer	1.26e-13	Increased	2.234		ABCA1,ABCA9,ABCB5,ABHD2,ABTB2,ACKR3,ACSL4,ACSL5,ADA,ADAM9,ADAMTS4,ADAMTS5,ADHFE1,AFF1,AGAP3,AGO2,AGPAT4,AGRN,AKAP6,ALAS1,AMDHD2,AMPD1,ANKRD28,ANKRD33B,ANO8,AP4S1,APOBEC3A,APOLD1,ARAP2,ARHGAP28,ARHGAP35,ARHGEF16,ARHGEF3,ARID5A,ARL11,ARL5B,ATF3,ATIC,ATP1A1,ATP6AP2,ATP6V0D1,ATP6V1B2,ATP8A1,ATP8B1,AXDND1,B4GALT5,B4GALT6,BACH2,BATF,BBS10,BBS2,BCAS1,BFAR,BHLHE40,BID,BIRC3,BLNK,BOC,C15orf59,C20orf96,C3o…	541
Cell-To-Cell Signaling and Interaction, Cellular Movement	Recruitment of cells	1.38e-13	Increased	4.236	bias	CCL2,CCL20,CCL22,CCL3L3,CCL4,CCL5,CCR7,CD274,CHI3L1,CSF1,CSF2,CSF2RB,CSF3,CXCL10,CXCL2,EDN1,EFNB2,FABP5,GAB2,HPSE,HRH1,ICAM1,IDO1,IL10,IL17A,IL1RN,IL23A,IL2RA,IL33,IL7,IL9,LGALS3,LIF,LTA,LTB4R,NFKBIB,NOD2,NTN1,OSM,PECAM1,PELI1,PTGS2,PTX3,RHOB,S1PR1,SDC1,SMAD3,STAT5A,TNF,TRPC6	50
Humoral Immune Response, Protein Synthesis	Production of antibody	1.39e-13		0.357		ATF3,BACH2,BATF,BHLHE40,BLNK,CCR7,CD274,CD83,CHI3L1,CRLF2,CSF2,CSF2RB,CXCL10,DUSP4,GADD45A,GADD45B,GADD45G,HEXB,HRH1,IL10,IL2RA,IL33,IL9,IRF1,IRF4,ITGB3,LGALS3,LTA,MYBL1,NFIL3,NFKBIZ,NOD2,NOS2,NR3C1,PTGS2,PTTG1,RNF128,RSAD2,SDC1,SFN,TBX21,TNF,TNFRSF21,TNFSF15,ZC3H12A	45
Connective Tissue Disorders, Inflammatory Disease, Inflammatory Response, Organismal Injury and Abnormalities, Skeletal and Muscular Disorders	Polyarthritis	1.39e-13		1.697		CCL20,CCL4,CCL5,CD274,CD83,CDA,CSF3,DUSP1,DUSP2,F11R,GADD45B,IL10,IL12B,IL17A,IL1RN,IL23A,IL33,LTA,NFKBIB,OSM,PECAM1,PLA2G4A,PRNP,PTGIR,PTGS2,STAT1,STAT4,TBX21,TLE3,TNF,TNFAIP3,TNFSF15	32
Cell-To-Cell Signaling and Interaction, Cellular Growth and Proliferation, Hematological System Development and Function	Stimulation of mononuclear leukocytes	1.52e-13	Increased	2.831	bias	CCL2,CCL20,CD274,CD83,CSF1,CSF2,CSF3,CXCL10,EFNB2,IL10,IL12B,IL17A,IL1RN,IL23A,IL27,IL27RA,IL33,IL7,LGALS8,NOS2,SLAMF1,SMAD3,STEAP1,TNF,TNFAIP3,TNFRSF18,TNFRSF25,TNFSF15	28
Cancer, Gastrointestinal Disease, Organismal Injury and Abnormalities	Gastrointestinal tract cancer	1.71e-13		1.209	bias	ABCA1,ABCA9,ABCB5,ABHD2,ABTB2,ACKR3,ACSL4,ACSL5,ADA,ADAM9,ADAMTS4,ADAMTS5,ADHFE1,AFF1,AGAP3,AGO2,AGRN,AKAP6,ALAS1,AMDHD2,AMPD1,ANKRD28,ANKRD33B,ANO8,AP4S1,APOBEC3A,APOLD1,ARAP2,ARHGAP28,ARHGAP35,ARHGEF16,ARHGEF3,ARID5A,ARL11,ARL5B,ATF3,ATIC,ATP1A1,ATP6AP2,ATP8A1,ATP8B1,AXDND1,B4GALT5,B4GALT6,BACH2,BATF,BBS2,BCAS1,BFAR,BHLHE40,BID,BIRC3,BLNK,BOC,C15orf59,C20orf96,C9orf72,CACHD1,CAMK2N1,CARS,CBLB,C…	487
Cancer, Hematological Disease, Organismal Injury and Abnormalities	Hematologic cancer	1.73e-13		-0.541		ABCA1,ABCA9,ABHD2,ACSL4,ADA,ADAM9,ADAMTS5,ARHGAP35,ATF3,ATIC,ATP6V1B2,ATP8B1,BACH2,BBS10,BCAS1,BIRC3,BLNK,C20orf96,CAMK2N1,CBLB,CCDC86,CCL2,CCL20,CCL22,CCL4,CCL5,CCL8,CCR7,CD274,CD33,CD48,CDA,CDC42EP2,CDCP1,CDK6,CDON,CFAP161,CFLAR,CHST15,CLIC3,CNTFR,COL27A1,CRLF2,CSF2,CSF2RB,CSF3,CTSK,CTSL,CTTN,CXCL10,CXCL2,CYP3A4,DENND3,DLL1,DLL4,DOT1L,DPH5,DUSP2,DUSP4,DUSP5,EBI3,EFNB2,ENC1,EPAS1,EZH2,F11R,FADD,…	199
Cancer, Gastrointestinal Disease, Organismal Injury and Abnormalities	Oral cancer	1.81e-13				ADAM9,ATIC,CCL8,CD274,CD48,CD83,CHI3L1,CXCL10,CXCL2,DUSP1,EMILIN2,EZR,F11R,FABP5,GBP2,IFIT2,IGFBP3,IL1RN,INHBA,ITGA9,LPAR1,MEGF10,MET,MGLL,MPC1,MRC1,PTGS2,RAB38,RIN2,SAT1,TGIF1,TGM2,THBD,TIAM1,TIMP1,TLE3,TM4SF1,TNF,TUBA1C,TUBB1	40
Cancer, Hematological Disease, Organismal Injury and Abnormalities	Lymphohematopoietic cancer	1.81e-13		-0.541		ABCA1,ABCA9,ABHD2,ACSL4,ADA,ADAM9,ADAMTS5,ARHGAP35,ATF3,ATIC,ATP6V1B2,ATP8B1,BACH2,BBS10,BCAS1,BIRC3,BLNK,C20orf96,CAMK2N1,CBLB,CCDC86,CCL2,CCL20,CCL22,CCL4,CCL5,CCL8,CCR7,CD274,CD33,CD48,CDA,CDC42EP2,CDCP1,CDK6,CDON,CFAP161,CFLAR,CHST15,CLIC3,CNTFR,COL27A1,CRLF2,CSF2,CSF2RB,CSF3,CTSK,CTSL,CTTN,CXCL10,CXCL2,CYP3A4,DENND3,DLL1,DLL4,DOT1L,DPH5,DUSP2,DUSP4,DUSP5,EBI3,EDN1,EFNB2,ENC1,EPAS1,EZH2,F11R,…	200
Organismal Injury and Abnormalities	Fibrosis	1.83e-13		-0.396		ADA,AGO2,ARG2,ATF3,BID,CCL2,CCL5,CFLAR,CISH,CRLF2,CSF1,CSF2,CSF3,CTSB,CTSK,CYP3A4,EBI3,EDN1,EZH2,FAM111B,FLT3,GDNF,HOPX,HSPB1,ICAM1,IL10,IL12B,IL17A,IL1RN,IL23A,IL2RA,IL33,IL7,INHBA,KLF15,LGALS3,LIF,LPAR1,NOS2,NPC1,NR3C1,OSM,PECAM1,PLA2G4A,PPARA,PPP3CC,PTGIR,PTGS2,PTX3,RGS16,RUNX2,SCD,SDC3,SEMA7A,SMAD3,SOAT1,SOCS3,STAT1,STAT4,TGIF1,TIMP1,TM4SF1,TNF,TNFAIP3,TNFSF4,UBD,VEGFB	67
Cellular Movement	Cell movement of breast cancer cell lines	1.99e-13	Increased	3.596	bias	ABCA1,ACSL4,ADAM9,ADGRF5,ARHGEF16,ATF3,CCL2,CCL5,CD9,CDCP1,CTSL,CTTN,CXCL10,DUSP5,EBI3,EZH2,F11R,GAB1,GAB2,GSDMB,IGFBP3,IL19,ITGAV,ITGB3,KLF4,LPAR1,MCF2L,MET,NOS2,OSGIN1,OSM,PLXNA1,PTPN1,PTPN23,RHOC,RUNX2,SDC1,SDC4,SFN,SMAD3,TGM2,TIAM1,TIMP1,TMEM2,TRAF4,TUBA1C	46
Inflammatory Response, Organismal Injury and Abnormalities, Respiratory Disease	Inflammation of lung	2.05e-13		-1.382	bias	ADA,AGO2,ATF3,BACH2,BID,CCL2,CCL22,CCL3L3,CFLAR,CISH,CRLF2,CSF2,CSF2RB,DUSP1,FLT3,HMGCR,HRH1,ICAM1,IGFBP3,IL10,IL12B,IL17A,IL2RA,IL33,IL9,INSIG1,ITGB3,LAT,LGALS3,LTA,MGLL,NEDD4L,NFKBIZ,NOD2,NOS2,NR3C1,OSM,PLA2G4A,PPP3CC,PRDX6,PTGIR,PTGS2,RNF128,SCARA5,SELENBP1,STAT1,TIMP1,TNF,TNFAIP6,TNFRSF25,TNFSF15,TNFSF4,TRAF4,TRPC6	54
Cardiovascular System Development and Function, Cellular Movement	Migration of endothelial cells	2.15e-13	Increased	3.85	bias	ACKR3,CCL2,CCL5,CD9,CSF2,DLL4,EDN1,EFNB2,F11R,GAB1,GADD45A,HPSE,HRH1,HSPB1,ICAM1,IGFBP3,IL17A,IL2RA,ITGA9,ITGAV,ITGB3,LOXL2,MAPK12,MET,NEU1,NRP2,PECAM1,PIM1,PLA2G4A,PLXNA1,PRKX,PTGS2,PTPN1,RHOB,S100A2,S1PR1,SAA1,SDC4,STAT5A,TARS,THBD,THRA,TIMP1,TNF,TNFRSF25,TNFSF15,ZC3H12A	47
Lipid Metabolism, Molecular Transport, Small Molecule Biochemistry	Accumulation of lipid	2.38e-13		-0.012		ABCA1,ATP8B1,BHLHE40,BID,CCL22,CSF2,CSF2RB,EDN1,ELOVL5,EPAS1,HEXA,HEXB,HMGCR,HRH1,HSD11B1,ICAM1,IFRD1,IL10,IL17A,IL1RN,INSIG1,LPAR1,MAPK12,MEDAG,MGLL,NOS2,NPC1,NPC2,PLA2G4A,PLTP,PPARA,PRDX6,PTPN1,RENBP,SAA1,SCD,SGMS2,SOAT1,SOCS3,STAT5A,TGIF1,TIMP1,TNF,UGCG,VEGFB	45
Connective Tissue Disorders, Organismal Injury and Abnormalities, Tissue Morphology	Deterioration of connective tissue	2.39e-13	Increased	2.19		ADAMTS4,ADAMTS5,BID,CFB,CTSK,DUSP1,HPSE,IL10,IL12B,IL17A,IL19,IL1RN,IL23A,IL27RA,IL33,IL7,ITGB3,LIF,NOD2,NR3C1,OSM,PLA2G4A,PTGIR,PTGS2,SCIN,SLC39A8,SMAD3,THRA,TNF,TNFAIP6,TNFRSF18,TNFSF4	32
Protein Synthesis	Production of protein	2.59e-13		0.432		ATF3,BACH2,BATF,BHLHE40,BLNK,CCR7,CD274,CD83,CHI3L1,CRLF2,CSF2,CSF2RB,CXCL10,DUSP4,GADD45A,GADD45B,GADD45G,HEXB,HRH1,IL10,IL17A,IL2RA,IL33,IL9,IRF1,IRF4,ITGB3,LGALS3,LTA,MYBL1,NFIL3,NFKBIZ,NOD2,NOS2,NR3C1,PTGS2,PTTG1,RNF128,RSAD2,SDC1,SFN,TBX21,TNF,TNFRSF21,TNFSF15,ZC3H12A	46
Cancer, Gastrointestinal Disease, Organismal Injury and Abnormalities	Gastrointestinal neoplasia	2.94e-13		0.225	bias	ABCA1,ABCA9,ABCB5,ABHD2,ABTB2,ACKR3,ACSL4,ACSL5,ADA,ADAM9,ADAMTS4,ADAMTS5,ADHFE1,AFF1,AGAP3,AGO2,AGRN,AKAP6,ALAS1,AMDHD2,AMPD1,ANKRD28,ANKRD33B,ANO8,AP4S1,APOBEC3A,APOLD1,ARAP2,ARHGAP28,ARHGAP35,ARHGEF16,ARHGEF3,ARID5A,ARL11,ARL5B,ATF3,ATIC,ATP1A1,ATP6AP2,ATP8A1,ATP8B1,AXDND1,B4GALT5,B4GALT6,BACH2,BAMBI,BATF,BBS2,BCAS1,BFAR,BHLHE40,BID,BIRC3,BLNK,BOC,C15orf59,C20orf96,C3orf20,C9orf72,CACHD1,CAMK2…	496
Embryonic Development, Organismal Development	Development of body trunk	2.97e-13	Increased	3.228	bias	ABCA1,ACKR3,ADA,ADGRF5,AP4S1,ARHGAP35,ATF3,BID,CCL2,CCL5,CCR7,CD83,CD9,CFLAR,CHI3L1,CISH,CSF1,CSF2,CSF2RB,CSF3,CTSK,CXCL10,CYP27A1,CYP27B1,DLL1,DLL4,DUSP1,ECE1,EDN1,EPAS1,EZH2,EZR,FADD,FADS2,FAM20A,FLT3,Foxp1,GAB1,GAB2,GADD45G,GAL,GDNF,GEM,GJA5,HOPX,HPSE,HSD11B1,HSPB1,HUNK,ICAM1,ID2,IL10,IL12B,IL17A,IL27,IL7,IL7R,INHBA,IRF1,JAG1,KLF15,KMT5C,LAT,LBH,LGALS3,LIF,LOXL2,LOXL3,LTA,MECP2,MET,MST1R,MYBL1…	115
Inflammatory Response	Cell-mediated response	3.14e-13		1.515	bias	CCL22,CCL5,CCR7,CD274,CSF2,CXCL10,EBI3,HRH1,ICAM1,IFIH1,IL10,IL12B,IL12RB2,IL17A,IL18BP,IL23A,IL27RA,IL33,IL7,IL7R,IL9,IRF1,ITGB8,LTA,NFIL3,NOD2,NOS2,SMAD3,STAT4,STAT5A,TBX21,TNF,TNFRSF21,TNFSF4	34
Organ Development, Skeletal and Muscular System Development and Function, Tissue Development	Growth of muscle tissue	3.6e-13	Increased	2.777		CCL2,CCL5,CDK6,CSF3,CTSB,CXCL10,DLL1,DUSP1,EDN1,EFNB2,FADD,FOXK1,FZD4,GNAI1,HMGCR,HOPX,ID2,IGFBP3,IL10,IL12B,IL17A,IL1RN,INHBA,IRF1,ITGB3,KLF4,LIF,LPAR1,MET,NOS2,OSM,P2RX5,P2RY6,PPARA,PRNP,PTGIR,PTGS2,PTPN1,RUNX2,S1PR1,SDC4,SMAD3,SOCS3,STAT1,TFPI2,TGM2,THBD,TIMP1,TNF,TNFAIP3,TRPC6	51
Cardiovascular Disease	Vascular lesion	4.07e-13		0.354		ABCA1,ADGRF5,ARG2,CCL2,CCL3L3,CSF2,CTSK,CTSL,CXCL10,CXCL2,EFNB2,GRK4,HPSE,ICAM1,IL17A,IL33,ITGB3,KLF4,LTA,LTB4R,NOS2,NPC1,PECAM1,PIM1,PLA2G15,PPARA,PTGS2,PTX3,SCD,SDC1,SDC4,SMAD3,SOAT1,SOCS3,STAT5A,THBD,TIMP1,TNFAIP3,TNFSF4	39
Cell-To-Cell Signaling and Interaction, Cellular Movement, Hematological System Development and Function, Immune Cell Trafficking	Recruitment of leukocytes	4.32e-13	Increased	3.997	bias	CCL2,CCL20,CCL22,CCL3L3,CCL4,CCL5,CCR7,CD274,CHI3L1,CSF1,CSF2,CSF2RB,CSF3,CXCL10,CXCL2,EDN1,FABP5,GAB2,HPSE,ICAM1,IDO1,IL10,IL17A,IL1RN,IL23A,IL2RA,IL33,IL7,IL9,LGALS3,LIF,LTA,LTB4R,NOD2,NTN1,OSM,PECAM1,PELI1,PTX3,RHOB,S1PR1,SDC1,SMAD3,STAT5A,TNF,TRPC6	46
Cellular Growth and Proliferation	Expansion of cells	4.39e-13	Increased	4.308	bias	CCR7,CD274,CSF1,CSF2,CSF2RB,CSF3,DLL1,DLL4,EPAS1,EZH2,FLT3,GAB2,IL10,IL17A,IL23A,IL27,IL2RA,IL33,IL7,IL7R,IL9,INHBA,IRF1,LAT,LIF,MET,MYBL1,OSM,PIM1,PMP22,PTGS2,RUNX2,S1PR1,SERPINB9,SLAMF1,STAT4,STAT5A,TBX21,TNF,TNFAIP3,TNFAIP6,TNFRSF18,TNFSF15,TOX	44
Cardiovascular System Development and Function, Cellular Movement	Cell movement of endothelial cells	4.84e-13	Increased	4.027	bias	ACKR3,CCL2,CCL5,CD9,CSF2,DLL4,EDN1,EFNB2,F11R,GAB1,GADD45A,HPSE,HRH1,HSPB1,ICAM1,IGFBP3,IL17A,IL2RA,ITGA9,ITGAV,ITGB3,LGALS3,LOXL2,MAPK12,MET,NEU1,NRP2,NTN1,PECAM1,PIM1,PLA2G4A,PLXNA1,PRKX,PTGS2,PTPN1,RHOB,S100A2,S1PR1,SAA1,SDC4,STAT5A,TARS,THBD,THRA,TIMP1,TNF,TNFRSF25,TNFSF15,ZC3H12A	49
Cell-To-Cell Signaling and Interaction, Cellular Growth and Proliferation, Hematological System Development and Function	Stimulation of leukocytes	5.39e-13	Increased	3.029	bias	CCL2,CCL20,CCL5,CD274,CD83,CSF1,CSF2,CSF3,CXCL10,EFNB2,IL10,IL12B,IL17A,IL1RN,IL23A,IL27,IL27RA,IL33,IL7,LGALS3,LGALS8,LIF,NOS2,SLAMF1,SMAD3,STEAP1,TNF,TNFAIP3,TNFRSF18,TNFRSF25,TNFSF15	31
Cellular Development, Hematological System Development and Function, Hematopoiesis	Differentiation of leukocyte cell lines	5.66e-13	Increased	2.345	bias	BATF,BLNK,CD274,CSF1,CSF2,CSF3,HRH1,IL10,IL7,IL9,MYBL2,SOCS3,STAT1,STAT5A,TBX21	15
Inflammatory Response	TH1 immune response	6.65e-13		1.872		CCL5,CXCL10,EBI3,HRH1,ICAM1,IL10,IL12B,IL12RB2,IL17A,IL18BP,IL23A,IL27RA,IL9,IRF1,LTA,NOS2,STAT4,TBX21,TNF	19
Cell Death and Survival, Organismal Injury and Abnormalities	Apoptosis of epithelial cells	6.65e-13		0.285		BID,BIRC3,CCK,CDK6,CFLAR,CTSB,CXCL10,EDN1,EFNB2,FADD,GADD45A,GADD45B,ID2,IL10,IL17A,IL2RA,INHBA,IRF1,ITIH4,MET,NFKBIB,NR3C1,NTN1,OSM,PLA2G4A,PPARA,PRDX6,PTGS2,PTPN1,S1PR1,SAA1,SCD,SEMA7A,SGK1,SMAD3,SOCS3,STAT1,TGM2,TIMP1,TNF,USP2,VASN	42
Tissue Development	Growth of epithelial tissue	7.04e-13	Increased	2.417		BID,CCL2,CCL5,CCR7,CD109,CD9,CDK6,CFLAR,CSF1,CSF2,CSF2RB,CTSB,CXCL10,DLL4,EDN1,EFNB2,EPAS1,EZH2,EZR,F11R,FADD,Foxp1,GAB2,GADD45G,GLUL,HRH1,HUNK,ID2,IL10,IL17A,IL1RN,INHBA,ITGB3,ITGB8,ITIH4,KCNJ2,KLF4,LOXL2,LTA,LTB4R,MET,MST1R,NOD2,NR3C1,NRP2,NTN1,OSM,PECAM1,PIM1,PLA2G4A,PPARA,PRKX,PTGIR,PTGS2,PTPN1,RUNX2,SAA1,SDC4,SFN,SLC39A14,SMAD3,SOCS3,STAT1,STAT5A,TGM1,TGM2,THRA,TIMP1,TNF,TNFAIP6,TNFRSF25,TNF…	75
Cellular Movement, Hematological System Development and Function, Immune Cell Trafficking, Inflammatory Response	Migration of phagocytes	7.71e-13	Increased	4.456	bias	ABCA1,CCL2,CCL20,CCL22,CCL3L3,CCL4,CCL5,CCL8,CCR7,CSF1,CSF2,CSF3,CTSZ,CXCL10,CXCL2,EPAS1,F11R,ICAM1,IL10,IL12B,IL17A,IL1RN,IL33,ITGAV,ITGB3,LGALS3,MAPK12,NOS2,NRP2,NTN1,P2RY6,PECAM1,PRNP,PTGS2,RHOB,S1PR1,SAA1,SDC1,TIMP1,TNF,TNFSF18	41
Cancer, Organismal Injury and Abnormalities	Lymphoid Cancer and Tumors	7.8e-13		-0.486		ABCA1,ABCA9,ABHD2,ACSL4,ADA,ADAM9,ADAMTS5,ARHGAP35,ATF3,ATIC,ATP6V1B2,ATP8B1,BACH2,BBS10,BCAS1,BID,BIRC3,BLNK,C20orf96,CAMK2N1,CBLB,CCDC86,CCL2,CCL20,CCL22,CCL4,CCL8,CCR7,CD274,CD33,CD48,CDA,CDC42EP2,CDCP1,CDK6,CDON,CFAP161,CFLAR,CHST15,CLIC3,CNTFR,COL27A1,CRLF2,CSF2,CSF2RB,CSF3,CTSL,CTTN,CXCL10,CXCL2,CYP3A4,DENND3,DLL1,DLL4,DOT1L,DPH5,DUSP2,DUSP4,DUSP5,EBI3,EDN1,EFNB2,ENC1,EPAS1,EZH2,F11R,FADD,F…	195
Cell-To-Cell Signaling and Interaction, Hematological System Development and Function	T cell response	8.11e-13	Increased	2.143	bias	ADA,CBLB,CCL2,CD274,CSF2,CSF2RB,EBI3,ICAM1,IL10,IL12B,IL12RB2,IL17A,IL23A,IL27,IL27RA,IL2RA,IL33,IL7,IL7R,IL9,LIF,NFIL3,NOS2,SOCS3,STAT4,STAT5A,TBX21,TNF,TNFRSF18,TNFRSF25	30
Hematological System Development and Function, Immune Cell Trafficking, Inflammatory Response, Tissue Development	Accumulation of T lymphocytes	8.3e-13	Increased	3.079		CCL2,CCL22,CCL5,CCR7,CD274,CXCL10,DUSP1,EZH2,IER3,IL12B,IL17A,IL23A,IL2RA,IL33,IL9,LAT,NR3C1,RGS16,S1PR1,STAT5A,TNF,TNFRSF21,TNFRSF25,TNFSF4	24
Cell-mediated Immune Response, Cellular Movement, Hematological System Development and Function, Immune Cell Trafficking	T cell migration	8.84e-13	Increased	3.452	bias	ACKR3,BACH2,BATF,CCL2,CCL20,CCL22,CCL3L3,CCL4,CCL5,CCL8,CCR7,CD274,CXCL10,EZR,ICAM1,IL10,IL12B,IL17A,IL18BP,IL23A,IL2RA,IL7,ITGA9,ITGAV,ITGB3,LAT,LTA,NOS2,NR3C1,PECAM1,PTGS2,RGS16,S1PR1,SAA1,SOCS3,STAT1,TGM2,TNF,TNFRSF21,TNFSF4	40
Gastrointestinal Disease, Inflammatory Disease, Inflammatory Response, Organismal Injury and Abnormalities	Inflammation of large intestine	8.94e-13		0.12	bias	BATF,BID,CCL2,CCL3L3,CD274,CFB,CRLF2,CSF2,CXCL10,CXCL2,EBI3,EDN1,GBP2,HSD11B1,ICAM1,ID2,IL10,IL12B,IL17A,IL1RN,IL23A,IL27RA,IL2RA,IL33,IL7,ITGB3,ITGB8,MPC1,NFIL3,NOD2,NOS2,NR3C1,PLA2G4A,PPARA,PPP3CC,PTGS2,S1PR1,SIGMAR1,SMAD3,SOCS3,STAT1,STAT4,STAT5A,TBX21,TNF,TNFAIP3,TNFRSF25,TNFSF15	48
Cancer, Organismal Injury and Abnormalities, Reproductive System Disease	Breast or ovarian cancer	9.03e-13	Decreased	-2.008		ABCA1,ADAM9,ADAMTS4,ADAMTS5,ADGRF5,AGO2,AKAP6,AMPD1,ARG2,ARHGAP35,ATF3,ATIC,ATP6V1B2,ATP8A1,ATP8B1,BBS10,BHLHE40,C3orf20,CCL2,CCL4,CCR7,CD109,CD274,CD48,CD9,CDCP1,CDK6,CFB,CFLAR,CHI3L1,CLDN4,CNDP2,COL27A1,CSF2,CSF2RB,CSF3,CTSB,CTSK,CTSZ,CXCL10,CXCL2,CYP3A4,DENND2D,DENND3,DLL1,DLL4,DNAH17,DOT1L,DUSP1,DUSP2,DUSP4,DUSP5,EDN1,EFNB2,EMILIN2,EPAS1,EVPL,EXT1,EZH2,F11R,FABP5,FADD,FAM105A,FAM111B,FBL,FBP2…	205
Cancer, Hematological Disease, Organismal Injury and Abnormalities	Lymphoid cancer	9.57e-13		-0.745		ABCA1,ABCA9,ABHD2,ACSL4,ADA,ADAM9,ADAMTS5,ARHGAP35,ATF3,ATIC,ATP6V1B2,ATP8B1,BACH2,BBS10,BCAS1,BIRC3,BLNK,C20orf96,CAMK2N1,CBLB,CCDC86,CCL2,CCL20,CCL22,CCL4,CCL8,CCR7,CD274,CD33,CD48,CDA,CDC42EP2,CDCP1,CDK6,CDON,CFAP161,CFLAR,CHST15,CLIC3,CNTFR,COL27A1,CRLF2,CSF2,CSF2RB,CSF3,CTSL,CTTN,CXCL10,CXCL2,CYP3A4,DENND3,DLL1,DLL4,DOT1L,DPH5,DUSP2,DUSP4,DUSP5,EBI3,EDN1,EFNB2,ENC1,EPAS1,EZH2,F11R,FADD,FAM16…	194
Gastrointestinal Disease, Inflammatory Response	Inflammation of gastrointestinal tract	1.04e-12		-1.133	bias	BATF,BID,CCL2,CCL3L3,CCR7,CD274,CFB,CRLF2,CSF2,CTSB,CXCL10,CXCL2,EBI3,EDN1,GBP2,HSD11B1,ICAM1,ID2,IL10,IL12B,IL12RB2,IL17A,IL1RN,IL23A,IL27RA,IL2RA,IL33,IL7,ITGB3,ITGB8,LGALS3,MPC1,NFIL3,NOD2,NOS2,NR3C1,OLFM4,PLA2G4A,PPARA,PPP3CC,PTGS2,S1PR1,SIGMAR1,SMAD3,SOCS3,STAT1,STAT4,STAT5A,TBX21,TNF,TNFAIP3,TNFRSF25,TNFSF15	53
Hematological System Development and Function, Humoral Immune Response, Lymphoid Tissue Structure and Development, Tissue Morphology	Quantity of B lymphocytes	1.05e-12	Increased	3.226	bias	ACKR3,AFF1,BACH2,BLNK,CCR7,CD274,CRLF2,CSF1,CSF2,CSF3,CTSB,DLL1,DLL4,FLT3,Foxp1,GADD45B,GADD45G,ID2,IL10,IL17A,IL33,IL7,IL7R,IL9,INHBA,IRF4,KLF4,LIF,LTA,MYBL1,MYBL2,NFKBIB,NOS2,PECAM1,PIM1,PNP,PRNP,RUNX2,S1PR1,SDC1,SFN,SOCS3,STAT1,STAT5A,THRA,TNF,TNFSF15,ZC3H12A	48
Dermatological Diseases and Conditions, Inflammatory Disease, Inflammatory Response, Organismal Injury and Abnormalities	Dermatitis	1.06e-12		-0.607		ABCA1,ADA,ATP1A1,CCL20,CCL22,CCL5,CCR7,CSF2,CSF2RB,CSF3,CTSL,CYP3A4,DUSP1,DUSP2,FABP5,FADS2,GADD45A,HRH1,IL10,IL17A,IL1RN,IL23A,IL27,IL2RA,IL33,ITGB3,LTA,LTB4R,MXI1,NFKBIB,NFKBIZ,NOS2,NR3C1,OPTN,OSM,PPARA,PPP3CC,PTGIR,PTGS2,S100A2,SCARA5,SFN,SOAT1,SOCS3,STAT1,TBX21,TGM3,THBD,TIMP1,TNF,TNFAIP3,TUBA1C,TUBB1,ZNF331	54
Lipid Metabolism, Small Molecule Biochemistry	Fatty acid metabolism	1.23e-12	Increased	4.467	bias	A4GALT,ABCA1,ACSL4,ACSL5,ADA,ATP8A1,ATP8B1,B4GALT6,CCL2,CCL5,CD83,CD9,CNTFR,CSF1,CSF2,CYP27A1,CYP3A4,EDN1,ELOVL5,FABP5,FADD,FADS2,FAM57B,HMOX2,HRH1,IL10,IL17A,IL1RN,IL27,IL33,INSIG1,ITGAV,ITGB3,LIF,LPGAT1,LTB4R,MGLL,NOS2,NPC1,NPC2,NTN1,OSBPL8,OSM,PLA2G15,PLA2G4A,PLA2G4F,PLEKHA8,PLTP,PNPLA8,PPARA,PRDX6,PRNP,PTGES2,PTGS2,S1PR1,SAA1,SCD,SGMS2,SMAD3,SOAT1,SOCS3,SPTSSA,STAT5A,TNF,TNFAIP8L3,TRIB3,UGCG	67
Organismal Injury and Abnormalities, Tissue Morphology	Morphology of lesion	1.32e-12				ARG2,BID,CBR3,CSF1,CSF2,CSF3,CTSB,CTSZ,EHF,GDNF,ICAM1,IDO1,IL10,IL12RB2,IL17A,IL18BP,IL1RN,IL33,IRF1,ITGB3,JAG1,LGALS3,LTA,MET,MST1R,MYBL2,NOS2,NPC1,NR3C1,OSM,PIM1,PLA2G4A,PLK3,PPARA,PPIF,PRNP,PTGS2,PTX3,SMAD3,SOAT1,SOCS3,SPINT1,STAT1,TGM2,THBD,TIMP1,TNF,TNFAIP3,TNFSF4	49
Hematological System Development and Function, Lymphoid Tissue Structure and Development, Tissue Morphology	Morphology of lymphoid tissue	1.35e-12				ABCA1,ADA,AFF1,ATP6AP2,BACH2,BATF,BHLHE40,BLNK,CCR7,CDK6,CFLAR,CSF1,CSF2RB,CSF3,CTSA,CYP27B1,DLL4,EFNB2,FADD,FADS2,GADD45A,GPX7,ID2,IL10,IL1RN,IL2RA,IL33,IL7,IL7R,IRF1,IRF4,ITGB3,LAT,LTA,MET,MXI1,MYBL1,NFKBIZ,NOD2,NOS2,NR3C1,PIM1,PLA2G15,PNP,PPP1R15A,PTGS2,PTTG1,RHOH,RNF128,RUNX2,SELENBP1,SFN,SMAD3,SOCS3,STAT5A,TGM2,TMPRSS6,TNF,TNFAIP3,TNFRSF18,TNFRSF21,TOX,ZC3H12A	63
Cellular Development, Cellular Growth and Proliferation, Hematological System Development and Function, Hematopoiesis, Lymphoid Tissue Structure and Development, Tissue Development	Differentiation of antigen presenting cells	1.45e-12	Increased	3.871	bias	BATF,BATF3,CCL2,CSF1,CSF2,CSF2RB,CSF3,CXCL10,DCSTAMP,DLL1,DUSP5,FADD,FLT3,GAB2,ID2,IL10,IL17A,IL1RN,IL2RA,IL33,INHBA,IRF4,JAG1,KLF4,LIF,LTA,NFIL3,SOCS3,STAT1,STAT5A,TIMP1,TNF,TNFSF15,UBD	34
Hematological System Development and Function, Lymphoid Tissue Structure and Development, Tissue Morphology	Quantity of natural killer cells	1.72e-12	Increased	2.344	bias	CCR7,EBI3,ID2,IL12B,IL17A,IL2RA,IL33,IL7,IL7R,IRF1,ISG15,LIF,LTA,NFIL3,NPC1,NPC2,P2RX5,RHOH,STAT5A,TBX21,TNFAIP3,TNFRSF25,TNFSF15,TOX	24
Cell Death and Survival, Cellular Compromise	Toxicity of cells	1.74e-12	Increased	2.292	bias	AGAP3,ARL8B,CBLB,CCL2,CCL5,CD274,CD48,CFLAR,CSF2,CTSB,FADD,GDNF,ICAM1,IL10,IL12B,IL12RB2,IL1RN,IL23A,IL27,IL7,LAT,LGALS3,MYBL2,NOS2,NPC1,PLTP,PNP,SGK1,SLAMF7,STAT1,STAT4,TBX21,TNF,TNFAIP3,ULBP3	35
Gastrointestinal Disease, Inflammatory Disease, Inflammatory Response, Organismal Injury and Abnormalities	Colitis	1.78e-12		0.443	bias	BATF,BID,CCL2,CD274,CFB,CRLF2,CSF2,CXCL10,CXCL2,EBI3,EDN1,GBP2,HSD11B1,ICAM1,ID2,IL10,IL12B,IL17A,IL1RN,IL23A,IL27RA,IL2RA,IL33,IL7,ITGB3,ITGB8,MPC1,NFIL3,NOD2,NOS2,NR3C1,PLA2G4A,PPARA,PPP3CC,PTGS2,S1PR1,SIGMAR1,SMAD3,SOCS3,STAT1,STAT4,STAT5A,TBX21,TNF,TNFAIP3,TNFRSF25,TNFSF15	47
Cellular Development, Cellular Growth and Proliferation	Expansion of blood cells	1.82e-12	Increased	3.718	bias	CCR7,CD274,CSF2,CSF3,DLL1,DLL4,EPAS1,EZH2,FLT3,GAB2,IL10,IL17A,IL23A,IL27,IL2RA,IL33,IL7,IL7R,IL9,INHBA,IRF1,LAT,MET,MYBL1,PIM1,S1PR1,SERPINB9,SLAMF1,STAT4,STAT5A,TBX21,TNF,TNFAIP3,TNFRSF18,TNFSF15,TOX	36
Cellular Development, Cellular Growth and Proliferation, Hematological System Development and Function, Hematopoiesis	Proliferation of hematopoietic cells	2.48e-12	Increased	2.726	bias	AGRN,BLNK,CCL2,CCL20,CCL3L3,CCL4,CSF1,CSF2,CSF2RB,CSF3,CXCL10,CXCL2,DLL1,DLL4,EPAS1,EZH2,FADD,FLT3,IL10,IL17A,IL27,IL33,IL7,IL7R,IL9,INHBA,KLF4,LGALS3,LIF,LTA,PIM1,PTGS2,S1PR1,SHB,SOCS3,STAT1,STAT5A,TNF,TNFAIP3,TOX	40
Cellular Movement	Homing of cells	2.74e-12	Increased	5.322	bias	ACKR3,ARHGEF16,BATF,CCL2,CCL20,CCL22,CCL3L3,CCL4,CCL5,CCL8,CCR7,CD9,CSF1,CSF2,CSF3,CXCL10,CXCL2,EDN1,EFNB2,FADD,GAB1,GDNF,HPSE,HRH1,ICAM1,IGFBP3,IL10,IL12B,IL17A,IL19,IL23A,IL33,IL7,INHBA,ITGA9,ITGAV,ITGB3,LAT,LGALS3,LIF,LPAR1,LTB4R,MET,NOD2,NR3C1,NRP2,NTN1,OSM,PPARA,PRNP,PTGS2,PTPN1,RHOB,S1PR1,SAA1,SLAMF1,SLAMF8,SMAD3,SOCS3,STX4,THBD,TIAM1,TNF,TNFSF18,TRPC6,TRPV2	66
Infectious Diseases	Parasitic Infection	2.85e-12	Decreased	-2.934	bias	BATF3,CD274,CFB,CISH,DUSP4,EBI3,GBP2,ICAM1,IL10,IL12B,IL17A,IL27,IL27RA,IL33,IL9,KCNJ2,LGALS3,LTA,NOS2,NR3C1,PLA2G4A,PTGS2,RGS16,SDC1,SLAMF1,SOCS3,STAT4,TBX21,THRA,TNF,TNFSF4	31
Cancer, Gastrointestinal Disease, Organismal Injury and Abnormalities	Oral squamous cell carcinoma	2.92e-12				ADAM9,CCL8,CD274,CD48,CD83,CHI3L1,CXCL10,CXCL2,EMILIN2,EZR,F11R,GBP2,IGFBP3,IL1RN,INHBA,ITGA9,LPAR1,MEGF10,MET,MGLL,MPC1,MRC1,PTGS2,RAB38,RIN2,TGIF1,TGM2,THBD,TIAM1,TLE3,TM4SF1,TUBA1C,TUBB1	33
Cell Death and Survival	Cell death of T lymphocytes	2.96e-12		-0.407		ADA,BID,CCDC86,CCL4,CCL5,CD274,CD9,CFLAR,CHI3L1,CXCL10,DLL4,DRAM1,DUSP5,EZR,FADD,GIMAP4,ICAM1,ID2,IDO1,IER3,IL10,IL27,IL2RA,IL7,IL7R,IL9,IRF4,LAT,LGALS3,MET,NOS2,NR3C1,PECAM1,PNP,RHOH,SERPINB9,STAT1,STAT5A,TBX21,TGM2,TNF,TNFRSF18,TNFRSF25	43
Cellular Movement, Hematological System Development and Function, Immune Cell Trafficking	Migration of antigen presenting cells	3.04e-12	Increased	3.461	bias	CCL2,CCL20,CCL22,CCL3L3,CCL4,CCL5,CCR7,CSF1,CSF2,CTSZ,CXCL10,EPAS1,ICAM1,IL10,IL12B,IL1RN,IL33,ITGAV,LGALS3,NOS2,NRP2,NTN1,P2RY6,PRNP,PTGS2,RHOB,S1PR1,SDC1,TIMP1,TNF	30
Lymphoid Tissue Structure and Development, Organ Morphology, Tissue Morphology	Quantity of lymphoid organ	3.3e-12	Increased	2.166	bias	AFF1,ATP6AP2,BHLHE40,BLNK,CCR7,CD83,CDK6,CRLF2,CSF2,DLL4,DUSP5,EFNB2,FADD,FADS2,GADD45A,ID2,IL10,IL12B,IL7,IL7R,IRF1,KLF4,LAT,LIF,LTA,MXI1,MYBL1,MYBL2,NOD2,NOS2,NR3C1,OSM,PIM1,PNP,RHOH,RUNX2,STAM,STAT1,STAT5A,TNF,TOX	41
Cellular Development, Cellular Growth and Proliferation, Organ Development, Skeletal and Muscular System Development and Function, Tissue Development	Proliferation of muscle cells	3.47e-12	Increased	2.777		CCL2,CCL5,CDK6,CSF3,CTSB,CXCL10,DUSP1,EDN1,EFNB2,FADD,FOXK1,FZD4,GNAI1,HMGCR,HOPX,ID2,IGFBP3,IL10,IL12B,IL17A,IL1RN,INHBA,IRF1,ITGB3,KLF4,LIF,LPAR1,MET,NOS2,OSM,P2RY6,PPARA,PRNP,PTGIR,PTGS2,PTPN1,RUNX2,S1PR1,SDC4,SMAD3,SOCS3,STAT1,TFPI2,TGM2,THBD,TIMP1,TNF,TNFAIP3,TRPC6	49
Neurological Disease, Organismal Injury and Abnormalities	Demyelination of spinal cord	3.69e-12		1.796		CCL2,CCL5,CSF2,CXCL10,IL10,IL12B,IL12RB2,LIF,LPAR1,NR3C1,S1PR1,TNF,TNFAIP3	13
Cell Death and Survival, Gastrointestinal Disease, Hepatic System Disease, Organismal Injury and Abnormalities	Apoptosis of hepatocytes	4.22e-12		1.757		BID,BIRC3,CFLAR,CTSB,CXCL10,FADD,GADD45B,IL10,IL17A,INHBA,IRF1,ITIH4,MET,NFKBIB,OSM,PPARA,PTGS2,PTPN1,SAA1,SCD,SMAD3,SOCS3,STAT1,TNF,USP2,VASN	26
Cell-To-Cell Signaling and Interaction, Cellular Growth and Proliferation	Stimulation of lymphatic system cells	4.22e-12	Increased	2.584	bias	CD274,CD83,CSF1,CSF2,CSF3,CXCL10,EFNB2,IL10,IL12B,IL17A,IL1RN,IL23A,IL27,IL27RA,IL33,IL7,LGALS8,NOS2,SLAMF1,SMAD3,STEAP1,TNF,TNFAIP3,TNFRSF18,TNFRSF25,TNFSF15	26
Cell-To-Cell Signaling and Interaction, Cellular Growth and Proliferation, Hematological System Development and Function	Stimulation of lymphocytes	4.29e-12	Increased	2.379	bias	CD274,CD83,CSF2,CSF3,CXCL10,EFNB2,IL10,IL12B,IL17A,IL1RN,IL23A,IL27,IL27RA,IL33,IL7,LGALS8,NOS2,SLAMF1,SMAD3,STEAP1,TNF,TNFAIP3,TNFRSF18,TNFRSF25,TNFSF15	25
Cell-To-Cell Signaling and Interaction, Cellular Growth and Proliferation	Induction of lymphatic system cells	4.37e-12	Increased	2.083	bias	CD274,CD83,CSF1,CSF2,CSF3,IL10,IL12B,IL17A,IL1RN,IL23A,IL27,IL27RA,IL33,IL7,NOS2,SMAD3,STEAP1,TNFAIP3	18
Cell Death and Survival	Removal of cells	4.41e-12		0.92	bias	CCL2,CCL22,CCL3L3,CFLAR,CSF2,CSF3,FABP5,IL10,IL12B,IL1RN,IL23A,IL27RA,ITGAV,LGALS3,LTA,PECAM1,PLA2G4A,PTX3,RUBCN,STAT4,TGM2,TNF,TNFAIP3	23
Connective Tissue Disorders, Organismal Injury and Abnormalities, Skeletal and Muscular Disorders, Tissue Morphology	Damage of bone	4.57e-12	Increased	2.461		BID,CFB,CTSK,DUSP1,HPSE,IL10,IL12B,IL17A,IL19,IL1RN,IL23A,IL27RA,IL7,ITGB3,LIF,NR3C1,OSM,PLA2G4A,PTGIR,PTGS2,SCIN,SLC39A8,SMAD3,THRA,TNF,TNFRSF18,TNFSF4	27
Cellular Development, Cellular Growth and Proliferation, Hematological System Development and Function, Lymphoid Tissue Structure and Development	Expansion of leukocytes	4.68e-12	Increased	3.524	bias	CCR7,CD274,CSF2,CSF3,DLL4,FLT3,GAB2,IL10,IL17A,IL23A,IL27,IL2RA,IL33,IL7,IL7R,IL9,IRF1,LAT,MET,MYBL1,PIM1,S1PR1,SERPINB9,SLAMF1,STAT4,STAT5A,TBX21,TNF,TNFAIP3,TNFRSF18,TNFSF15,TOX	32
Cell-mediated Immune Response, Cellular Development, Cellular Function and Maintenance, Cellular Growth and Proliferation, Embryonic Development, Hematological System Development and Function, Hematopoiesis, Lymphoid Tissue Structure and Development, Organ Development, Organismal Development, Tissue Development	Differentiation of Th1 cells	5.05e-12	Increased	2.069	bias	CD274,CFLAR,CSF2,DLL1,DLL4,EZH2,GADD45B,GADD45G,ICAM1,IL10,IL12B,IL12RB2,IL17A,IL27,IL27RA,IRF1,IRF4,SOCS3,STAT1,STAT4,TBX21	21
Gastrointestinal Disease, Inflammatory Disease	Gastroenteritis	5.26e-12		-0.651	bias	BATF,BID,CCL2,CCL3L3,CD274,CFB,CRLF2,CSF2,CXCL10,CXCL2,EBI3,EDN1,GBP2,HRH1,HSD11B1,ICAM1,ID2,IL10,IL12B,IL17A,IL1RN,IL23A,IL27RA,IL2RA,IL33,IL7,ITGB3,ITGB8,LGALS3,MPC1,NFIL3,NOD2,NOS2,NR3C1,OLFM4,PLA2G4A,PPARA,PPP3CC,PTGS2,S1PR1,SIGMAR1,SMAD3,SOCS3,STAT1,STAT4,STAT5A,TBX21,TNF,TNFAIP3,TNFRSF25,TNFSF15	51
Cancer, Organismal Injury and Abnormalities	Advanced malignant solid tumor	5.27e-12		0.851	bias	ABCA1,ACKR3,ADAM9,ATF3,ATIC,ATP8B1,CCL2,CCL5,CCR7,CD274,CD48,CD9,CDK6,CEMIP,CLDN4,CSF1,CSF2,CSF2RB,CTSB,CTSZ,CYP3A4,DUSP4,EBI3,EDN1,EPAS1,EZH2,FADD,FLT3,GLUL,HSD11B1,ICAM1,ID2,IDO1,IL17A,IL1RN,IL2RA,IL33,ITGA9,ITGB3,JAG1,KCNJ2,KLF4,LGALS3,LGALS8,MET,MLPH,MSC,MST1R,MYBL2,NR3C1,PARP3,PDE10A,PPP3CC,PRNP,PTGS2,PTTG1,PTX3,RHOC,ROS1,RUNX2,SCD,SDC1,SLC38A6,SMAD3,STAT1,TBX21,TFPI2,THBD,TM4SF1,TNF,TUBA1C,…	74
Cell Death and Survival, Cellular Function and Maintenance	Clearance of cells	5.37e-12		0.92	bias	CCL2,CCL22,CCL3L3,CFLAR,CSF2,CSF3,FABP5,IL10,IL12B,IL1RN,IL23A,IL27RA,LGALS3,LTA,PECAM1,PLA2G4A,PTX3,RUBCN,STAT4,TGM2,TNF,TNFAIP3	22
Cancer, Gastrointestinal Disease, Organismal Injury and Abnormalities	Oral cavity carcinoma	5.58e-12				ADAM9,ATIC,CCL8,CD274,CD48,CD83,CHI3L1,CXCL10,CXCL2,EMILIN2,EZR,F11R,GBP2,IGFBP3,IL1RN,INHBA,ITGA9,LPAR1,MEGF10,MET,MGLL,MPC1,MRC1,PTGS2,RAB38,RIN2,TGIF1,TGM2,THBD,TIAM1,TIMP1,TLE3,TM4SF1,TUBA1C,TUBB1	35
Hematological System Development and Function, Lymphoid Tissue Structure and Development, Organ Morphology, Tissue Morphology	Morphology of lymphoid organ	6.06e-12				ABCA1,ADA,AFF1,ATP6AP2,BLNK,CCR7,CDK6,CFLAR,CSF1,CSF2RB,CSF3,CTSA,CYP27B1,DLL4,EFNB2,FADD,FADS2,GADD45A,GPX7,ID2,IL10,IL1RN,IL2RA,IL33,IL7,IL7R,IRF1,IRF4,ITGB3,LAT,LTA,MXI1,MYBL1,NFKBIZ,NOD2,NOS2,NR3C1,PIM1,PLA2G15,PNP,PPP1R15A,PTGS2,PTTG1,RHOH,RNF128,RUNX2,SELENBP1,SFN,SMAD3,SOCS3,STAT5A,TGM2,TMPRSS6,TNF,TNFAIP3,TNFRSF18,TOX,ZC3H12A	58
Cellular Movement, Hematological System Development and Function, Immune Cell Trafficking, Inflammatory Response	Infiltration by neutrophils	6.45e-12		0.057		CCL4,CFB,CSF1,CSF3,CTSB,CXCL10,CXCL2,DUSP1,GJB2,HSPB1,ICAM1,IL10,IL17A,IL1RN,IL2RA,IL33,LGALS3,LTB4R,NOS2,NTN1,PLTP,PTGS2,PTX3,SGK1,SOCS3,THBD,TIMP1,TNF,TNFAIP3,TNFRSF18	30
Cell-To-Cell Signaling and Interaction, Cellular Movement, Hematological System Development and Function, Immune Cell Trafficking	Recruitment of granulocytes	6.7e-12	Increased	3.488	bias	CCL2,CCL20,CCL22,CCL3L3,CCL4,CCL5,CCR7,CD274,CHI3L1,CSF1,CSF2,CSF2RB,CXCL10,CXCL2,EDN1,HPSE,ICAM1,IL10,IL17A,IL1RN,IL33,IL7,IL9,LGALS3,LIF,LTB4R,NOD2,NTN1,PTX3,S1PR1,SMAD3,STAT5A,TNF,TRPC6	34
Cardiovascular System Development and Function	Neovascularization	6.87e-12	Increased	3.021	bias	ADAM9,CFB,CSF1,CSF2,CSF3,EFNB2,EPAS1,HPSE,ICAM1,IGFBP3,IL10,IL17A,IL1RN,INHBA,ITGB3,LGALS3,LIF,NOS2,NR3C1,NTN1,PLA2G4A,PTGS2,SDC4,SOCS3,STAT5A,TIMP1,TNF,TNFAIP3,VEGFB	29
Cancer, Organismal Injury and Abnormalities	Metastatic solid tumor	7e-12		0.851	bias	ABCA1,ACKR3,ADAM9,ATF3,ATIC,CCL2,CCL5,CCR7,CD274,CD48,CD9,CDK6,CEMIP,CLDN4,CSF1,CSF2,CSF2RB,CTSB,CTSZ,CYP3A4,DUSP4,EBI3,EDN1,EPAS1,EZH2,FADD,FLT3,GLUL,ICAM1,ID2,IDO1,IL1RN,IL2RA,IL33,ITGA9,ITGB3,JAG1,KCNJ2,LGALS3,LGALS8,MET,MLPH,MSC,MST1R,NR3C1,PARP3,PDE10A,PPP3CC,PRNP,PTGS2,PTTG1,PTX3,RHOC,ROS1,RUNX2,SCD,SDC1,SLC38A6,SMAD3,STAT1,TBX21,THBD,TM4SF1,TNF,TUBA1C,TUBB1,VEGFB	67
Gastrointestinal Disease, Organismal Injury and Abnormalities	Abnormality of large intestine	7.11e-12		0.039	bias	BATF,BID,CBLB,CCL2,CCL3L3,CD274,CFB,CRLF2,CSF2,CXCL10,CXCL2,EBI3,EDN1,GBP2,HSD11B1,ICAM1,ID2,IL10,IL12B,IL17A,IL1RN,IL23A,IL27RA,IL2RA,IL33,IL7,ITGB3,ITGB8,MPC1,NFIL3,NOD2,NOS2,NR3C1,PLA2G4A,PPARA,PPP3CC,PTGS2,S1PR1,SIGMAR1,SMAD3,SOCS3,STAT1,STAT4,STAT5A,TBX21,TNF,TNFAIP3,TNFRSF25,TNFSF15	49
Gastrointestinal Disease, Inflammatory Disease, Inflammatory Response, Organismal Injury and Abnormalities	Enteritis	7.11e-12		-0.653	bias	BATF,BID,CCL2,CCL3L3,CD274,CFB,CRLF2,CSF2,CXCL10,CXCL2,EBI3,EDN1,GBP2,HSD11B1,ICAM1,ID2,IL10,IL12B,IL17A,IL1RN,IL23A,IL27RA,IL2RA,IL33,IL7,ITGB3,ITGB8,LGALS3,MPC1,NFIL3,NOD2,NOS2,NR3C1,PLA2G4A,PPARA,PPP3CC,PTGS2,S1PR1,SIGMAR1,SMAD3,SOCS3,STAT1,STAT4,STAT5A,TBX21,TNF,TNFAIP3,TNFRSF25,TNFSF15	49
Cellular Movement, Hematological System Development and Function, Immune Cell Trafficking, Inflammatory Response	Migration of macrophages	7.57e-12	Increased	3.216	bias	CCL2,CCL22,CCL3L3,CCL4,CCL5,CSF1,CSF2,CXCL10,EPAS1,IL12B,IL1RN,IL33,LGALS3,NOS2,NTN1,P2RY6,PRNP,PTGS2,RHOB,S1PR1,SDC1	21
Cell Death and Survival	Cell viability of leukocytes	7.67e-12	Increased	5.05	bias	BLNK,CCL4,CCR7,CD48,CFLAR,CISH,CSF1,CSF2,CSF2RB,CSF3,GAB2,ICAM1,IL10,IL17A,IL27,IL27RA,IL33,IL7,IL7R,IL9,IRF4,LAT,LGALS3,MYBL2,NFIL3,PIM1,PRDX6,SERPINB9,SMAD3,STAM,STAT1,STAT4,STAT5A,TBX21,TGM2,TNF,TNFRSF18,TNFSF15	38
Lymphoid Tissue Structure and Development, Tissue Morphology	Quantity of lymphoid tissue	7.9e-12	Increased	2.735	bias	ACKR3,AFF1,ATP6AP2,BHLHE40,BLNK,CCR7,CD274,CD83,CDK6,CRLF2,CSF2,DLL1,DLL4,DUSP5,EFNB2,FADD,FADS2,GADD45A,ID2,IL10,IL12B,IL7,IL7R,IRF1,KLF4,LAT,LIF,LTA,MXI1,MYBL1,MYBL2,NFKBIB,NOD2,NOS2,NR3C1,OSM,PIM1,PNP,PRNP,RHOH,RUNX2,SFN,STAM,STAT1,STAT5A,TNF,TNFSF15,TOX	48
Cellular Movement	Migration of breast cancer cell lines	8.6e-12	Increased	3.571	bias	ACSL4,ADAM9,ADGRF5,ARHGEF16,ATF3,CCL2,CCL5,CD9,CDCP1,CTSL,CTTN,CXCL10,DUSP5,EBI3,EZH2,GAB1,GAB2,IGFBP3,IL19,ITGAV,ITGB3,KLF4,MCF2L,MET,NOS2,OSGIN1,OSM,PLXNA1,RHOC,RUNX2,SDC1,SDC4,SFN,SMAD3,TGM2,TIAM1,TIMP1,TMEM2,TRAF4	39
Hematological Disease	Toxemia	9.43e-12		0.988	bias	ADA,ARID5A,ATF3,BID,BIRC3,CXCL10,ICAM1,IL10,IL1RN,ITGAV,LTA,MGLL,NFKBIB,NOD2,NOS2,NR3C1,PDE10A,PDE7A,PTGS2,STAT1,STAT4,TGM2,TNF,TNFAIP3	24
Cell Signaling, Small Molecule Biochemistry	Synthesis of nitric oxide	1.03e-11	Increased	2.697	bias	AGRN,ARG2,CPM,CSF1,CSF2,DUSP1,EDN1,GDNF,GNAI1,HMGCR,HRH1,ICAM1,IGFBP3,IL10,IL12B,IL12RB2,IL17A,IL1RN,IL23A,IL27RA,IRF1,KLF4,LIF,MET,NMB,NOS2,NR3C1,NTN1,P2RY6,PTGS2,PTX3,S1PR1,SMAD3,SOCS3,STAT1,STAT4,TNF,TNFAIP3,ZC3H12A	39
Humoral Immune Response, Protein Synthesis	Quantity of IgG1	1.09e-11		-0.805		BACH2,BATF,BHLHE40,BLNK,CCR7,CD274,CD83,CSF2,CSF2RB,DUSP4,GADD45A,GADD45B,GADD45G,IL10,IL2RA,IRF4,MYBL1,NFIL3,PTGS2,RNF128,RSAD2,SDC1,TNF,TNFRSF21,ZC3H12A	25
Cardiovascular Disease, Organismal Injury and Abnormalities	Atherosclerotic lesion	1.14e-11		0.249		ABCA1,ADGRF5,ARG2,CCL2,CCL3L3,CSF2,CXCL10,CXCL2,GRK4,ICAM1,IL17A,IL33,ITGB3,LTA,NOS2,NPC1,PECAM1,PLA2G15,PPARA,PTX3,SCD,SDC4,SOAT1,SOCS3,STAT5A,THBD,TIMP1,TNFAIP3,TNFSF4	29
Lipid Metabolism, Small Molecule Biochemistry	Biosynthesis of polyunsaturated fatty acids	1.25e-11	Increased	4.06	bias	ACSL4,ADA,CCL5,CD83,CNTFR,CSF1,CSF2,CYP3A4,EDN1,FADS2,HMOX2,HRH1,IL10,IL17A,IL1RN,IL27,IL33,LTB4R,NOS2,NPC1,NPC2,NTN1,PLA2G4A,PLA2G4F,PNPLA8,PRNP,PTGES2,PTGS2,S1PR1,SCD,SMAD3,SOAT1,STAT5A,TNF	34
Cell-To-Cell Signaling and Interaction, Cellular Movement, Hematological System Development and Function, Immune Cell Trafficking, Inflammatory Response	Recruitment of phagocytes	1.29e-11	Increased	3.091	bias	CCL2,CCL20,CCL22,CCL3L3,CCL4,CCL5,CCR7,CD274,CHI3L1,CSF1,CSF2,CXCL10,CXCL2,EDN1,GAB2,ICAM1,IDO1,IL10,IL17A,IL1RN,IL2RA,IL33,IL7,IL9,LGALS3,LIF,LTB4R,NOD2,NTN1,OSM,PECAM1,PTX3,RHOB,S1PR1,SMAD3,TNF,TRPC6	37
Hematological System Development and Function, Inflammatory Response, Tissue Morphology	Quantity of macrophages	1.29e-11		1.529		ABCA1,ADA,BID,BIRC3,CCL2,CCL22,CSF1,CSF2,CXCL10,GPR68,HSD11B1,IL10,IL12B,IL12RB2,IL23A,IL33,ITGB3,LGALS3,LIF,NFKBIB,NPC1,PLA2G15,SOAT1,SOCS3,STAT4,TBX21,TGM2,THBD,THRA,TNF,TNFAIP3,USP2	32
Lipid Metabolism, Small Molecule Biochemistry	Synthesis of fatty acid	1.35e-11	Increased	3.793	bias	ABCA1,ACSL4,ADA,CCL5,CD83,CNTFR,CSF1,CSF2,CYP27A1,CYP3A4,EDN1,ELOVL5,FADS2,HMOX2,HRH1,IL10,IL17A,IL1RN,IL27,IL33,INSIG1,LIF,LPGAT1,LTB4R,NOS2,NPC1,NPC2,NTN1,PLA2G4A,PLA2G4F,PNPLA8,PRNP,PTGES2,PTGS2,S1PR1,SCD,SMAD3,SOAT1,SOCS3,STAT5A,TNF,TRIB3	42
Cell-To-Cell Signaling and Interaction, Cellular Movement	Recruitment of myeloid cells	1.46e-11	Increased	3.564	bias	CCL2,CCL20,CCL22,CCL3L3,CCL4,CCL5,CCR7,CD274,CHI3L1,CSF1,CSF2,CSF2RB,CXCL10,CXCL2,EDN1,GAB2,HPSE,ICAM1,IDO1,IL10,IL17A,IL1RN,IL2RA,IL33,IL7,IL9,LGALS3,LIF,LTB4R,NOD2,NTN1,PECAM1,PTX3,RHOB,S1PR1,SMAD3,STAT5A,TNF,TRPC6	39
Connective Tissue Development and Function, Tissue Development	Growth of connective tissue	1.51e-11	Increased	2.808	bias	ATF3,ATIC,CCL2,CD109,CD274,CD48,CD83,CDK6,CSF1,CSF2,CSF3,CTSB,DUSP1,DUSP4,EDN1,EFNB2,EZH2,FADD,FRMD6,GADD45A,GEM,HPSE,HSPB1,ID2,IDO1,IGFBP3,IL10,IL17A,IL2RA,IL7,INHBA,ITGAV,ITGB3,KLF4,KMT5C,LGALS3,LIF,LPAR1,LTA,MCF2L,MET,MLLT6,MYBL2,NR3C1,NUPR1,OSM,PLK2,PTGS2,PTPN1,PTTG1,RHOB,RUNX2,SAA1,SDC4,SFN,SMAD3,SOCS3,STAT1,STAT5A,TGIF1,TGM1,THRA,TIMP1,TLN2,TNF,TNFSF15,TRAF4,TRIM25,ZMIZ2	69
Metabolic Disease	Glucose metabolism disorder	1.53e-11		-0.316	bias	ABCA1,ACSL4,ATF3,BACH2,BATF3,BHLHE40,CARS,CBLB,CCK,CCL2,CCL22,CCL3L3,CCL4,CCL5,CCR7,CD274,CFB,CHI3L1,CISH,COL27A1,CSF2,CTSB,CTSK,CTSL,CXCL10,DDX25,DGAT2,DUSP1,EDN1,EPAS1,FABP5,FADD,FADS2,GAL,GBP2,GBP6,GPD2,HCAR3,HERC6,HMGCR,HPSE,HRH1,HSD11B1,HSPB1,ICAM1,IFIH1,IFIT2,IFIT3,IGFBP3,IL10,IL12B,IL17A,IL18BP,IL1RN,IL2RA,IL33,IRF1,IRF4,ITGAV,ITGB3,ITIH4,ITPR1,KCNJ2,KIAA1671,KLF15,KLF4,LAT,LGALS3,LTA,MET,…	116
Cellular Movement	Migration of tumor cells	1.53e-11	Increased	2.997	bias	CCL2,CCL5,CCR7,CSF1,CSF2,CSF3,CTSB,CTTN,CXCL10,DUSP1,EMILIN2,EZH2,EZR,GAB2,GDNF,HPSE,IL17A,KLF4,LGALS3,MET,MGLL,MST1R,OSM,PTGS2,PTTG1,RHOB,RHOC,S100A2,SH3BP4,STAT1,TIAM1,TIMP1,TM4SF1,TNF	34
Cell-mediated Immune Response, Cellular Development, Cellular Function and Maintenance, Cellular Growth and Proliferation, Embryonic Development, Hematological System Development and Function, Hematopoiesis, Lymphoid Tissue Structure and Development, Organ Development, Organismal Development, Tissue Development	Differentiation of CD4+ T-lymphocytes	1.55e-11		-0.139		BATF,BHLHE40,CD83,CISH,CSF2,EZH2,IL23A,IL27,IL7,KLF4,NOS2,SMAD3,SOCS3,STAT1,STAT4,STAT5A,TBX21,TOX	18
Cell Cycle	Cell cycle progression	1.56e-11	Increased	3.528	bias	ACKR3,ATF3,BLNK,CAMK2N1,CCK,CD274,CDK6,CSF1,CSF2,CSF3,CXCL10,CYP3A4,DOT1L,DUSP1,EDN1,EHF,EZH2,EZR,FADD,FLT3,FOXK1,FRMD6,GAB1,GAB2,GADD45A,GADD45B,GADD45G,GAL,GBP2,GEM,GRK4,GTF2H1,HSPB1,ID2,IER3,IFIH1,IGFBP3,IL10,IL12B,IL7,IL7R,INHBA,IRF1,KLF4,KMT5C,LAMTOR5,LGALS3,LIF,MAPK12,MECP2,MEIS2,MET,MGLL,MLLT6,MXI1,MYBL2,NOS2,NR3C1,NUPR1,OSM,PIM1,PLAGL2,PLK2,PLK3,PPARA,PPP1R13B,PPP1R15A,PTGS2,PTPN1,PTTG1,P…	98
Cellular Development, Cellular Growth and Proliferation, Hematological System Development and Function, Lymphoid Tissue Structure and Development	Expansion of mononuclear leukocytes	1.68e-11	Increased	3.254	bias	CCR7,CD274,CSF2,CSF3,DLL4,FLT3,GAB2,IL10,IL17A,IL23A,IL27,IL2RA,IL7,IL7R,IL9,IRF1,LAT,MYBL1,PIM1,S1PR1,SERPINB9,SLAMF1,STAT4,STAT5A,TBX21,TNF,TNFAIP3,TNFRSF18,TNFSF15,TOX	30
Cellular Movement, Hematological System Development and Function, Immune Cell Trafficking, Inflammatory Response	Chemotaxis of leukocytes	1.72e-11	Increased	4.495	bias	ACKR3,CCL2,CCL20,CCL22,CCL3L3,CCL4,CCL5,CCL8,CCR7,CD9,CSF1,CSF2,CXCL10,CXCL2,EDN1,HPSE,HRH1,ICAM1,IL10,IL12B,IL17A,IL23A,IL33,INHBA,ITGA9,ITGB3,LAT,LGALS3,LTB4R,NOD2,NR3C1,NRP2,PPARA,PRNP,RHOB,S1PR1,SAA1,SLAMF1,SLAMF8,SMAD3,SOCS3,TIAM1,TNF,TNFSF18,TRPC6,TRPV2	46
Inflammatory Disease, Respiratory Disease	Airway hyperresponsiveness	1.76e-11		1.347	bias	CCL2,CCL22,CCL3L3,CD274,CTTN,DLL4,IGFBP3,IL10,IL17A,IL1RN,IL27,IL27RA,IL9,LGALS3,LTA,LTB4R,OSM,SMAD3,SOCS3,STAT4,TBX21,TNF,TNFAIP6	23
Cellular Movement	Chemotaxis	1.85e-11	Increased	5.219	bias	ACKR3,ARHGEF16,CCL2,CCL20,CCL22,CCL3L3,CCL4,CCL5,CCL8,CCR7,CD9,CSF1,CSF2,CXCL10,CXCL2,EDN1,EFNB2,FADD,GAB1,GDNF,HPSE,HRH1,ICAM1,IL10,IL12B,IL17A,IL19,IL23A,IL33,IL7,INHBA,ITGA9,ITGAV,ITGB3,LAT,LGALS3,LIF,LPAR1,LTB4R,MET,NOD2,NR3C1,NRP2,NTN1,OSM,PPARA,PRNP,PTGS2,RHOB,S1PR1,SAA1,SLAMF1,SLAMF8,SMAD3,SOCS3,STX4,THBD,TIAM1,TNF,TNFSF18,TRPC6,TRPV2	62
Cellular Movement	Migration of cancer cells	1.86e-11	Increased	3.054	bias	CCL2,CCL5,CCR7,CSF1,CSF3,CTSB,CXCL10,DUSP1,EMILIN2,EZH2,EZR,GAB2,GDNF,HPSE,IL17A,KLF4,LGALS3,MET,MGLL,MST1R,OSM,PTGS2,PTTG1,RHOB,RHOC,S100A2,SH3BP4,STAT1,TIAM1,TM4SF1,TNF	31
Cell Death and Survival, Cellular Compromise	Cytotoxicity of cells	2.06e-11	Increased	2.338	bias	AGAP3,ARL8B,CBLB,CCL2,CCL5,CD274,CD48,CFLAR,CSF2,FADD,GDNF,ICAM1,IL10,IL12B,IL12RB2,IL23A,IL27,IL7,LAT,LGALS3,MYBL2,NOS2,NPC1,PLTP,PNP,SGK1,SLAMF7,STAT1,STAT4,TBX21,TNF,TNFAIP3,ULBP3	33
Cancer, Organismal Injury and Abnormalities	Cancer of head	2.14e-11		1.067		ADAM9,ADAMTS4,ADAMTS5,ATIC,CCL8,CD274,CD48,CD83,CDK6,CHI3L1,CXCL10,CXCL2,DUSP1,EMILIN2,EZH2,EZR,F11R,FABP5,GBP2,GNAI1,IFIT2,IGFBP3,IL1RN,INHBA,ITGA9,LOXL2,LPAR1,MEGF10,MET,MGLL,MPC1,MRC1,NOS2,NR3C1,PTGS2,RAB38,RBPMS,RIN2,ROS1,SAT1,TGIF1,TGM2,THBD,TIAM1,TIMP1,TLE3,TM4SF1,TNF,TUBA1C,TUBB1,VEGFB	51
Cellular Growth and Proliferation, Lymphoid Tissue Structure and Development	Expansion of lymphatic system cells	2.33e-11	Increased	3.422	bias	CCR7,CD274,CSF1,CSF2,CSF3,DLL4,FLT3,IL10,IL17A,IL23A,IL27,IL2RA,IL33,IL7,IL7R,IL9,IRF1,LAT,MYBL1,PIM1,S1PR1,SERPINB9,SLAMF1,STAT4,STAT5A,TBX21,TNF,TNFAIP3,TNFRSF18,TNFSF15,TOX	31
Cellular Movement	Infiltration by macrophages	2.37e-11		1.958		BID,CCL2,CCL4,CSF1,CSF2,CXCL10,EDN1,ICAM1,IL10,IL17A,IL1RN,IL33,ITGB3,LTA,NPC1,PLA2G4A,PLTP,PPP1R15A,PTGS2,PTPN1,PTX3,SAA1,SMAD3,STAT1,THBD,TNF,TNFAIP3,TNFRSF21,TNFSF4	29
Cellular Movement	Cell movement of tumor cells	2.39e-11	Increased	3.009	bias	CCL2,CCL5,CCR7,CSF1,CSF3,CTSB,DUSP1,EMILIN2,EZH2,EZR,GAB2,GDNF,HPSE,IL17A,KLF4,LGALS3,MET,MGLL,MST1R,OSM,PTGS2,PTTG1,RHOB,RHOC,S100A2,SH3BP4,STAT1,TIAM1,TM4SF1,TNF	30
Inflammatory Response	Function of immune system	2.39e-11				BATF3,BHLHE40,CBLB,CD274,CISH,CRISPLD2,CSF2RB,DUSP2,DUSP5,EBI3,GAB2,ICAM1,ID2,IL10,IL9,IRF1,IRF4,LAT,NFKBIB,NFKBIZ,NOD2,NOS2,PIM1,STAT5A,TNF,TRIB3	26
Cell Death and Survival, Cellular Compromise	Cytotoxicity of lymphatic system cells	2.71e-11	Increased	2.9	bias	ARL8B,CBLB,CCL2,CCL5,CD274,CD48,CFLAR,FADD,ICAM1,IL10,IL12B,IL12RB2,IL23A,IL27,IL7,LAT,LGALS3,MYBL2,NOS2,NPC1,PLTP,PNP,STAT1,STAT4,TBX21,TNF,ULBP3	27
Hematological Disease, Infectious Diseases	Endotoxemia	2.86e-11		1.199	bias	ADA,ARID5A,ATF3,BID,BIRC3,ICAM1,IL10,IL1RN,ITGAV,LTA,MGLL,NFKBIB,NOD2,NOS2,NR3C1,PDE10A,PDE7A,PTGS2,STAT1,STAT4,TGM2,TNF,TNFAIP3	23
Cellular Development, Cellular Growth and Proliferation, Hematological System Development and Function, Hematopoiesis	Proliferation of hematopoietic progenitor cells	2.92e-11	Increased	2.758	bias	AGRN,BLNK,CCL2,CCL20,CCL4,CSF1,CSF2,CSF3,CXCL10,CXCL2,DLL1,DLL4,EPAS1,EZH2,FADD,FLT3,IL10,IL17A,IL27,IL33,IL7,IL7R,IL9,INHBA,KLF4,LGALS3,LIF,LTA,PTGS2,S1PR1,SHB,SOCS3,STAT1,STAT5A,TNF,TNFAIP3,TOX	37
Cell-mediated Immune Response, Cellular Movement, Hematological System Development and Function, Immune Cell Trafficking	Cell movement of T lymphocytes	2.99e-11	Increased	2.974	bias	ACKR3,BACH2,BATF,CCL2,CCL20,CCL22,CCL3L3,CCL4,CCL5,CCL8,CCR7,CD274,CXCL10,ICAM1,IL10,IL12B,IL17A,IL18BP,IL23A,IL2RA,IL7,ITGAV,ITGB3,LAT,LTA,NR3C1,PTGS2,RGS16,S1PR1,SAA1,SOCS3,STAT1,TGM2,TNF,TNFRSF21	35
Cellular Movement	Cell movement of muscle cells	3e-11	Increased	2.388	bias	ATF3,CCL2,CCL5,CDK6,CSF1,CSF2,CTTN,CXCL10,CXCL2,DUSP1,F11R,FZD4,GAB1,IL19,IL7,LPAR1,LTA,MEGF10,MET,PLA2G4A,PTGIR,PTGS2,PTPN1,S1PR1,SDC4,SMAD3,TBX21,TFPI2,TIMP1,TNF	30
Immunological Disease	Atopy	3.24e-11		-0.217		ABCA1,CCL20,CCL22,CCL5,CISH,CSF2RB,CTSL,DUSP1,DUSP2,EZH2,FABP5,FADS2,GAB2,GADD45A,HRH1,IL10,IL17A,IL1RN,IL2RA,IL33,IL9,LAT,MXI1,NFKBIZ,NOS2,NR3C1,OPTN,OSM,PECAM1,PLA2G4A,PPARA,PPP3CC,PTGES2,PTGS2,S100A2,SOCS3,STAT1,TGM3,TIMP1,TNF,TNFAIP3,TUBB1,ZNF331	43
Cellular Movement, Hematological System Development and Function, Immune Cell Trafficking, Inflammatory Response	Cellular infiltration by macrophages	3.3e-11		1.746	bias	BID,CCL2,CCL4,CSF1,CSF2,CXCL10,EDN1,ICAM1,IL10,IL17A,IL1RN,IL33,LTA,NPC1,PLA2G4A,PLTP,PPP1R15A,PTGS2,PTPN1,PTX3,SAA1,SMAD3,STAT1,THBD,TNF,TNFAIP3,TNFRSF21,TNFSF4	28
Lipid Metabolism, Small Molecule Biochemistry	Synthesis of eicosanoid	3.43e-11	Increased	4.056	bias	ACSL4,ADA,CCL5,CD83,CNTFR,CSF1,CSF2,CYP3A4,EDN1,FADS2,HMOX2,HRH1,IL10,IL17A,IL1RN,IL27,IL33,LTB4R,NOS2,NPC1,NPC2,NTN1,PLA2G4A,PLA2G4F,PNPLA8,PRNP,PTGES2,PTGS2,S1PR1,SMAD3,SOAT1,STAT5A,TNF	33
Cell Death and Survival	Apoptosis of myeloid cells	3.76e-11		-0.398		ATF3,BID,BIRC3,CCL2,CCL5,CFLAR,CSF1,CSF2,CSF3,CXCL2,DLL1,FADD,IL10,IL17A,IL19,IL1RN,IL33,IL9,IRF1,ISG15,LGALS3,MYBL2,NOS2,NPC1,PIM1,PLA2G4A,SOAT1,STAT1,STAT5A,TNF	30
Cellular Movement, Hematological System Development and Function, Immune Cell Trafficking	Homing of leukocytes	3.85e-11	Increased	4.594	bias	ACKR3,BATF,CCL2,CCL20,CCL22,CCL3L3,CCL4,CCL5,CCL8,CCR7,CD9,CSF1,CSF2,CXCL10,CXCL2,EDN1,HPSE,HRH1,ICAM1,IL10,IL12B,IL17A,IL23A,IL33,INHBA,ITGA9,ITGB3,LAT,LGALS3,LTB4R,NOD2,NR3C1,NRP2,PPARA,PRNP,RHOB,S1PR1,SAA1,SLAMF1,SLAMF8,SMAD3,SOCS3,TIAM1,TNF,TNFSF18,TRPC6,TRPV2	47
Lipid Metabolism, Small Molecule Biochemistry	Synthesis of lipid	3.89e-11	Increased	3.833	bias	A4GALT,ABCA1,ACSL4,ACSL5,ADA,ATF3,ATP1A1,ATP8B1,B4GALT6,CCL2,CCL5,CD83,CD9,CNTFR,CSF1,CSF2,CXCL10,CYP27A1,CYP27B1,CYP3A4,DDX25,DGAT2,DHRS9,EDN1,ELOVL5,FABP5,FADS2,FAM57B,HEXB,HMGCR,HMOX2,HRH1,HSD11B1,HSD3B7,IL10,IL17A,IL1RN,IL27,IL33,INHBA,INSIG1,LIF,LPGAT1,LTB4R,NOS2,NPC1,NPC2,NR3C1,NTN1,PISD,PLA2G4A,PLA2G4F,PLTP,PNPLA8,PPARA,PRNP,PTGES2,PTGS2,PTX3,RUNX2,S1PR1,SCD,SGMS2,SMAD3,SOAT1,SOCS3,SPTSSA,…	72
Cellular Growth and Proliferation	Inhibition of cells	3.98e-11	Increased	3.248	bias	CBLB,CCL4,CD274,CSF1,CSF2,CSF3,CXCL10,EDN1,HPSE,IDO1,IL10,IL17A,IL1RN,IL27,IL9,MGLL,OSM,PIM1,PTGS2,RNF128,SDC1,SEMA7A,TBX21,TIMP1,TNF,TNFRSF18,TNFSF15	27
Hematological System Development and Function, Lymphoid Tissue Structure and Development, Organ Morphology, Tissue Morphology	Morphology of secondary lymphoid organ	4.13e-11				ABCA1,ADA,BLNK,CCR7,CDK6,CFLAR,CSF1,CSF2RB,CSF3,CTSA,EFNB2,FADD,FADS2,GPX7,ID2,IL10,IL2RA,IL33,IL7,IRF1,IRF4,ITGB3,LAT,LTA,MXI1,MYBL1,NFKBIZ,PLA2G15,PNP,PPP1R15A,PTGS2,PTTG1,RHOH,RNF128,RUNX2,SELENBP1,SFN,SMAD3,SOCS3,STAT5A,TGM2,TMPRSS6,TNF,TNFAIP3,TNFRSF18,TOX,ZC3H12A	47
Free Radical Scavenging	Synthesis of reactive oxygen species	4.18e-11	Increased	3.278	bias	ABCA1,ATP6AP2,BID,CCL4,CCL5,CFB,CSF1,CSF2,CSF3,CTTN,CXCL2,CYP3A4,DUSP1,EDN1,EPAS1,FADD,FLT3,GAB2,HSPB1,ICAM1,IL10,IL17A,IL19,IL33,ITGB3,ITIH4,LAT,LGALS3,LIF,MET,MLPH,MRC1,NOS2,NPC1,PECAM1,PIM1,PLA2G4A,PLAGL2,PPARA,PRDX6,PRNP,PRSS23,PTGS2,PTPN1,RYR1,SAT1,SIGMAR1,SMAD3,SOCS3,STAT5A,TFRC,TGM2,THRA,TNF,ZC3H12A	55
Cellular Development, Cellular Growth and Proliferation, Lymphoid Tissue Structure and Development	Expansion of lymphoid cells	5.38e-11	Increased	2.901	bias	CCR7,CD274,CSF2,DLL4,FLT3,IL10,IL17A,IL23A,IL27,IL2RA,IL33,IL7,IL7R,IL9,IRF1,LAT,MYBL1,PIM1,S1PR1,SERPINB9,SLAMF1,STAT4,STAT5A,TBX21,TNF,TNFAIP3,TNFRSF18,TNFSF15,TOX	29
Cellular Development, Cellular Growth and Proliferation, Hematological System Development and Function, Hematopoiesis, Lymphoid Tissue Structure and Development, Tissue Development	Differentiation of myeloid leukocytes	5.4e-11	Increased	3.933	bias	CCL2,CDK6,CSF1,CSF2,CSF2RB,CSF3,CXCL10,DCSTAMP,DLL1,DUSP5,FADD,FLT3,GAB2,GPR68,HRH1,ID2,IL10,IL17A,IL27,IL33,IL7,IL7R,IL9,INHBA,IRF4,ITGB3,KLF4,LIF,MYBL1,MYBL2,PLA2G4A,PRKX,SOCS3,STAT5A,TESC,TIMP1,TNF	37
Hematological System Development and Function, Tissue Morphology	Quantity of granulocytes	5.51e-11		-0.503		ADA,BID,CCL2,CCL22,CCL3L3,CISH,CSF1,CSF2,CSF2RB,CSF3,CXCL2,DUSP1,DUSP5,EZH2,GADD45A,HPSE,ICAM1,IGFBP3,IL10,IL17A,IL18BP,IL23A,IL2RA,IL33,IL9,ITPR1,LGALS3,LIF,NEDD4L,NOD2,NOS2,PTGS2,RUNX2,SMAD3,SOCS3,STAT4,STAT5A,THRA,TIMP1,TNF,TNFAIP3,TNFRSF25	42
Lipid Metabolism, Molecular Transport, Small Molecule Biochemistry	Concentration of fatty acid	5.62e-11		0.226		ACSL4,ADGRF5,CSF2,CYP27A1,DGAT2,DUSP1,EDN1,ELOVL5,FABP5,FADS2,GNAI1,GPD2,HRH1,HSD11B1,HSD3B7,IL10,IL12RB2,IL18BP,IL1RN,IL9,LIF,MGLL,MPC1,NOS2,NR3C1,NTN1,PLA2G4A,PLTP,PNPLA8,PPARA,PPP1R3C,PRDX6,PRNP,PTGIR,PTGS2,SAT1,SCD,TBC1D4,TNF	39
Cell-To-Cell Signaling and Interaction, Cellular Growth and Proliferation, Hematological System Development and Function	Induction of leukocytes	5.82e-11	Increased	2.406	bias	CD274,CD83,CSF1,CSF2,CSF3,IL10,IL12B,IL17A,IL1RN,IL23A,IL27,IL27RA,IL33,IL7,NOS2,SMAD3,STEAP1,TNF,TNFAIP3	19
Free Radical Scavenging	Metabolism of reactive oxygen species	5.91e-11	Increased	3.318	bias	ABCA1,ATP6AP2,BID,CCL4,CCL5,CFB,CSF1,CSF2,CSF3,CTTN,CXCL2,CYP3A4,DUSP1,EDN1,EPAS1,FADD,FLT3,GAB2,HSPB1,ICAM1,IL10,IL17A,IL19,IL33,ITGB3,ITIH4,LAT,LGALS3,LIF,MET,MLPH,MRC1,NOS2,NPC1,PECAM1,PIM1,PLA2G4A,PLAGL2,PPARA,PRDX6,PRNP,PRSS23,PTGS2,PTPN1,RYR1,SAT1,SH3PXD2B,SIGMAR1,SMAD3,SOCS3,STAT5A,TFRC,TGM2,THRA,TNF,ZC3H12A	56
Cell-mediated Immune Response, Cellular Development, Cellular Function and Maintenance, Cellular Growth and Proliferation, Embryonic Development, Hematological System Development and Function, Hematopoiesis, Lymphoid Tissue Structure and Development, Organ Development, Organismal Development, Tissue Development	Differentiation of Th2 cells	7.12e-11		-0.71		BATF,CBLB,CCL5,CISH,DLL1,DLL4,EZH2,IL10,IL12B,IL17A,IRF1,IRF4,RSAD2,STAT1,STAT4,STAT5A,TBX21,TNF,TNFSF4	19
Cancer, Organismal Injury and Abnormalities	Genitourinary tumor	7.49e-11		1.169		ABCA1,ABCA9,ABCB5,ACBD7,ACSL4,ADAM9,ADAMTS4,ADAMTS5,AFF1,AGO2,AGPAT4,AKAP6,ALAS1,ALS2CL,AMPD1,ANKRD28,ANO8,APOBEC3A,APOLD1,ARAP2,ARG2,ARHGAP28,ARHGAP35,ARHGEF3,ARL5B,ATF3,ATIC,ATP1A1,ATP6V1B2,ATP8A1,ATP8B1,AXDND1,B4GALT6,BAMBI,BBS10,BHLHE40,BIRC3,BTBD19,BTD,C3orf20,C3orf62,CACHD1,CACNG4,CBLB,CCL2,CCL4,CCL5,CCR7,CD109,CD274,CD33,CD48,CD83,CD9,CDA,CDCP1,CDH23,CDON,CELF3,CFAP161,CFB,CFLAR,CHI3L1,CHS…	383
Cell-To-Cell Signaling and Interaction, Cellular Growth and Proliferation, Hematological System Development and Function	Induction of mononuclear leukocytes	7.55e-11		1.955	bias	CD274,CD83,CSF1,CSF2,IL10,IL12B,IL17A,IL1RN,IL23A,IL27,IL27RA,IL33,IL7,NOS2,SMAD3,STEAP1,TNFAIP3	17
Hematological System Development and Function, Lymphoid Tissue Structure and Development, Tissue Morphology	Quantity of Th17 cells	8.35e-11	Increased	2.34		ARID5A,BATF,CD274,CSF3,FABP5,ICAM1,IL23A,IL9,IRF4,ITGB8,NFIL3,NOD2,SAA1,SOCS3,TNF,TOB1	16
Infectious Diseases	Replication of virus	8.66e-11		0.177	bias	AGO2,ATP6AP2,ATP6V0D1,ATP6V1B2,ATP6V1G1,BIRC3,CACNG4,CCL2,CCL22,CCL3L3,CCL4,CCL5,CD48,CFLAR,CXCL10,DTX2,DUSP1,EBI3,EFNB2,EPAS1,EZH2,F11R,FADD,GAB1,GPR146,HMGCR,IFIH1,IL10,IL17A,IL27,IRF1,ISG15,ISG20,MOV10,NFKBIB,NMI,NOS2,OPTN,P2RY6,PLK3,PPARA,PPP1R15A,PRNP,PTPN1,PTX3,RAB9A,RHOH,RSAD2,SGK1,SIGMAR1,SOCS3,STAT1,STAT4,TNF,TNFRSF18,TRIM25,TRPV2,USP2,ZC3H12A	59
Neurological Disease	Demyelination of central nervous system	8.84e-11		1.873	bias	CCL2,CCL3L3,CCL5,CSF2,CXCL10,IL10,IL12B,IL12RB2,LIF,LPAR1,NR3C1,S1PR1,TNF,TNFAIP3	14
Cancer, Gastrointestinal Disease, Organismal Injury and Abnormalities	Gastrointestinal carcinoma	1.05e-10		0.335	bias	ABCA1,ABCA9,ABCB5,ABHD2,ABTB2,ACSL4,ADA,ADAM9,ADAMTS4,ADAMTS5,ADHFE1,AFF1,AGAP3,AGO2,AGRN,AKAP6,ALAS1,AMDHD2,AMPD1,ANKRD28,ANKRD33B,ANO8,AP4S1,APOBEC3A,APOLD1,ARAP2,ARHGAP28,ARHGAP35,ARHGEF16,ARHGEF3,ARID5A,ARL11,ARL5B,ATIC,ATP1A1,ATP6AP2,ATP8A1,ATP8B1,AXDND1,B4GALT5,B4GALT6,BACH2,BATF,BBS2,BFAR,BHLHE40,BID,BLNK,BOC,C15orf59,C20orf96,C9orf72,CACHD1,CAMK2N1,CARS,CBLB,CBLN3,CBR3,CCDC86,CCL20,CCL8,C…	458
Cellular Growth and Proliferation, Hematological System Development and Function	Inhibition of T lymphocytes	1.08e-10	Increased	2.768	bias	CBLB,CD274,CSF2,HPSE,IDO1,IL10,IL17A,IL27,IL9,PIM1,PTGS2,RNF128,TBX21,TNF,TNFRSF18,TNFSF15	16
Cancer, Organismal Injury and Abnormalities	Urogenital cancer	1.09e-10		0.896		ABCA1,ABCA9,ABCB5,ACBD7,ACSL4,ADAM9,ADAMTS4,ADAMTS5,AFF1,AGO2,AGPAT4,AKAP6,ALAS1,ALS2CL,AMPD1,ANKRD28,ANO8,APOBEC3A,APOLD1,ARAP2,ARG2,ARHGAP28,ARHGAP35,ARHGEF3,ARL5B,ATF3,ATIC,ATP1A1,ATP6V1B2,ATP8A1,ATP8B1,AXDND1,B4GALT6,BAMBI,BBS10,BHLHE40,BIRC3,BTBD19,BTD,C3orf20,C3orf62,CACHD1,CACNG4,CBLB,CCL2,CCL4,CCL5,CCR7,CD109,CD274,CD33,CD48,CD83,CD9,CDA,CDCP1,CDH23,CDON,CELF3,CFAP161,CFB,CFLAR,CHI3L1,CHS…	376
Cell Death and Survival	Cell death of myeloid cells	1.14e-10		-0.487		ATF3,BID,BIRC3,CCL2,CCL5,CFLAR,CSF1,CSF2,CSF3,CTSB,CXCL2,DLL1,FADD,IL10,IL17A,IL19,IL1RN,IL33,IL9,IRF1,ISG15,LGALS3,MYBL2,NOS2,NPC1,NR3C1,PIM1,PLA2G4A,SOAT1,STAT1,STAT5A,TNF	32
Infectious Diseases	Infection by DNA virus	1.21e-10		-0.456		ADA,CCL2,CCL3L3,CCL4,CCL5,CD274,CSF1,CSF2RB,CXCL10,CYP3A4,HMGCR,HS3ST1,IL10,IL17A,IL1RN,IL23A,IL2RA,IRF1,NFKBIZ,NOS2,NR3C1,PPP3CC,PRNP,PTGS2,STAT1,TIMP1,TNF	27
Cellular Growth and Proliferation, Connective Tissue Development and Function, Tissue Development	Proliferation of connective tissue cells	1.28e-10	Increased	2.628	bias	ATF3,ATIC,CCL2,CD109,CDK6,CSF1,CSF2,CSF3,CTSB,DUSP1,DUSP4,EDN1,EFNB2,EZH2,FADD,FRMD6,GADD45A,GEM,HPSE,HSPB1,ID2,IDO1,IGFBP3,IL10,IL17A,INHBA,ITGAV,ITGB3,KLF4,KMT5C,LGALS3,LIF,LPAR1,LTA,MCF2L,MET,MLLT6,MYBL2,NR3C1,NUPR1,OSM,PLK2,PTGS2,PTPN1,PTTG1,RHOB,RUNX2,SAA1,SDC4,SFN,SMAD3,SOCS3,STAT1,TGIF1,TGM1,THRA,TIMP1,TLN2,TNF,TNFSF15,TRAF4,TRIM25,ZMIZ2	63
Tissue Morphology	Morphology of connective tissue	1.28e-10				ABCA1,ATF3,BBS2,BIRC3,CDK6,CFLAR,CREB3L1,CSF1,CSF2,CTSK,DLL4,DUSP1,EDN1,EFNB2,FAM20A,G0S2,GAB2,GADD45A,GPD2,GPR68,HRH1,HSD11B1,ID2,IFRD1,IGFBP3,IL10,IL1RN,INSIG1,ITGB3,JAG1,LIF,LTBP2,MECP2,MET,MRAS,MYBL1,NOS2,NR6A1,OSM,P2RY6,PDE10A,PIM1,PNPLA8,PPARA,PPP1R15A,PTGS2,PTPN1,PTTG1,RUNX2,SAT1,SCD,SH3PXD2B,SMAD3,SPINT1,STAT1,STAT5A,TBC1D4,TFRC,THRA,TIAM1,TIMP1,TMPRSS6,TNF,TNFSF15,TOB1,TRAF4,TUBB1,ZC3H12A	68
Hematological System Development and Function, Lymphoid Tissue Structure and Development, Organ Morphology, Organismal Development, Tissue Morphology	Morphology of spleen	1.29e-10				ABCA1,ADA,BLNK,CCR7,CDK6,CFLAR,CSF1,CSF2RB,CSF3,CTSA,EFNB2,FADD,FADS2,GPX7,IL10,IL2RA,IL33,IL7,IRF1,IRF4,ITGB3,LAT,LTA,MXI1,MYBL1,NFKBIZ,PLA2G15,PNP,PPP1R15A,PTGS2,PTTG1,RHOH,RNF128,RUNX2,SELENBP1,SFN,SMAD3,SOCS3,STAT5A,TGM2,TMPRSS6,TNF,TNFAIP3,TNFRSF18,TOX,ZC3H12A	46
Cell-To-Cell Signaling and Interaction, Cellular Growth and Proliferation, Hematological System Development and Function	Stimulation of T lymphocytes	1.38e-10		1.893	bias	CD274,CD83,CSF2,EFNB2,IL10,IL12B,IL1RN,IL23A,IL27,IL27RA,IL33,IL7,LGALS8,NOS2,SLAMF1,SMAD3,TNF,TNFAIP3,TNFRSF18,TNFRSF25,TNFSF15	21
Cellular Development, Cellular Growth and Proliferation, Hematological System Development and Function, Lymphoid Tissue Structure and Development	Expansion of lymphocytes	1.7e-10	Increased	2.743	bias	CCR7,CD274,CSF2,DLL4,FLT3,IL10,IL17A,IL23A,IL27,IL2RA,IL7,IL7R,IL9,IRF1,LAT,MYBL1,PIM1,S1PR1,SERPINB9,SLAMF1,STAT4,STAT5A,TBX21,TNF,TNFAIP3,TNFRSF18,TNFSF15,TOX	28
Organismal Development, Organismal Injury and Abnormalities	Abnormal morphology of abdomen	1.79e-10				ABCA1,ACSL4,ADA,ARHGAP35,ATF3,BBS10,BHLHE40,BID,BLNK,CCR7,CDK6,CFB,CISH,CRIM1,CSF1,CSF2,CTSA,CYP27A1,CYP27B1,DUSP1,FADS2,FAM20A,GADD45A,GADD45G,GDNF,GPX7,HEXA,HEXB,HSD11B1,ID2,IDO1,IGFBP3,IL10,IL2RA,IL7,IL7R,IL9,IRF1,IRF4,ITGB3,JAG1,KLF4,LAT,LGALS3,LIF,LTA,MET,MST1R,MXI1,MYBL1,NFIL3,NFKBIZ,NOD2,NOS2,NPC1,NR3C1,NUPR1,PECAM1,PLA2G15,PLA2G4A,PLAGL2,PPARA,PPP1R15A,PTGS2,PTPN1,PTTG1,PTX3,RHOH,RNF128,R…	84
Cell-To-Cell Signaling and Interaction, Cellular Movement, Hematological System Development and Function, Immune Cell Trafficking, Inflammatory Response	Recruitment of neutrophils	1.82e-10	Increased	2.403	bias	CCL2,CCL20,CCL22,CCL3L3,CCL4,CCL5,CCR7,CD274,CHI3L1,CSF1,CSF2,CXCL10,CXCL2,EDN1,ICAM1,IL10,IL17A,IL1RN,IL33,IL7,LGALS3,LIF,NOD2,NTN1,PTX3,S1PR1,SMAD3,TNF,TRPC6	29
Cellular Movement, Hematological System Development and Function, Immune Cell Trafficking, Inflammatory Response	Chemotaxis of phagocytes	1.85e-10	Increased	4.848	bias	CCL2,CCL20,CCL22,CCL3L3,CCL4,CCL5,CCL8,CCR7,CD9,CSF1,CSF2,CXCL10,CXCL2,EDN1,HPSE,HRH1,ICAM1,IL10,IL12B,IL17A,IL23A,IL33,INHBA,ITGA9,ITGB3,LGALS3,LTB4R,NOD2,NRP2,PRNP,RHOB,SAA1,SLAMF1,SLAMF8,SMAD3,TNF,TNFSF18,TRPC6,TRPV2	39
Cellular Development, Connective Tissue Development and Function, Skeletal and Muscular System Development and Function, Tissue Development	Differentiation of osteoclasts	1.88e-10	Increased	2.328		CCL2,CCL3L3,CCL5,CD9,CSF1,CSF2,DCSTAMP,GAB2,GPR68,IL10,IL12B,IL17A,IL23A,IL27,IL33,IL7,INHBA,JAG1,KLF4,LAT,LIF,LPAR1,NOS2,PTGS2,RUNX2,SMAD3,SOCS3,STAT1,TFRC,TNF	30
Cellular Movement, Hematological System Development and Function, Immune Cell Trafficking, Inflammatory Response	Chemotaxis of antigen presenting cells	1.9e-10	Increased	3.026	bias	CCL2,CCL20,CCL22,CCL3L3,CCL4,CCL5,CCR7,CSF1,CSF2,CXCL10,HPSE,HRH1,ICAM1,IL10,IL12B,ITGB3,LGALS3,NRP2,RHOB,SAA1,SLAMF1,SLAMF8,SMAD3,TNF,TNFSF18,TRPV2	26
Protein Synthesis	Quantity of protein in blood	2e-10		-1.069		ABCA1,ADA,ARID5A,BBS10,CSF2,CYP27A1,CYP27B1,DUSP1,FABP5,GPD2,GPR68,HEXB,HPSE,HRH1,HSD11B1,IFIT2,IGFBP3,IL10,IL12B,IL12RB2,IL1RN,IL27RA,IRF1,LGALS3,LIF,MECP2,MRC1,NFIL3,NFKBIB,NOD2,NOS2,OLFM4,PDE10A,PLTP,PPARA,PPP1R3C,PTGS2,PTPN1,PTTG1,RNF128,SAT1,SCD,SDC3,SLC39A14,SOAT1,SOCS3,STAT1,STAT4,STX4,TBC1D4,TGM2,THBD,THRA,TMBIM1,TNF,WFS1	56
Cell Death and Survival	Apoptosis of phagocytes	2.03e-10		-0.179		ATF3,BID,BIRC3,CCL2,CCL5,CCR7,CFLAR,CSF1,CSF2,CSF3,CXCL2,DLL1,FADD,IL10,IL17A,IL19,IL1RN,IL33,IRF1,ISG15,LGALS3,NOS2,NPC1,PLA2G4A,SOAT1,STAT1,STAT5A,TNF,TNFAIP3	29
Hematological System Development and Function, Lymphoid Tissue Structure and Development, Tissue Development	Growth of lymphoid tissue	2.03e-10		1.874	bias	CCR7,CHI3L1,CISH,CRLF2,CSF3,CXCL10,EDN1,IL10,IL12RB2,IL17A,IL1RN,IL27,IL2RA,IL7,IL7R,INHBA,KLF4,LTB4R,NOS2,PIM1,PTGES2,PTGS2,RNF128,SMAD3,STAT4,STAT5A,TNF,TNFAIP3,TOX	29
Gene Expression	Expression of RNA	2.05e-10	Increased	2.336		ADA,AFF1,AGO2,AGRN,ANKRD33,ARHGAP35,ARID5A,ATF3,ATP8B1,BACH2,BAMBI,BATF,BATF3,BBS2,BHLHE40,BID,BLNK,CCL2,CCL3L3,CCL5,CD9,CDK6,CDON,CFLAR,CISH,CSF1,CSF2,CSF2RB,CSF3,CXCL10,DDX25,DLL1,DLL4,DOT1L,DUSP1,DUSP4,DUSP5,EDN1,EHF,EID2,ENC1,EPAS1,ETV3,EZH2,EZR,FADD,FNIP2,FOXK1,Foxp1,FZD4,GAB2,GADD45A,GADD45G,GAL,GBP2,GBP6,GDNF,GEM,GTF2H1,HEXB,HOPX,HPSE,HSPB1,ID2,IFRD1,IGFBP3,IL10,IL17A,IL23A,IL33,IL7R,INHBA…	164
Cellular Development, Cellular Growth and Proliferation, Hematological System Development and Function, Hematopoiesis, Lymphoid Tissue Structure and Development, Tissue Development	Development of antigen presenting cells	2.18e-10	Increased	2.779	bias	ABCA1,BATF,BATF3,CCL2,CD9,CSF1,CSF2,CSF3,DCSTAMP,DLL1,FADD,FLT3,ID2,IFRD1,IL10,IL1RN,IL2RA,IL33,IRF4,JAG1,LTA,NFIL3,STAT1,STAT5A,TNF,TNFSF15,UBD	27
Cell-mediated Immune Response, Cellular Development, Cellular Function and Maintenance, Cellular Growth and Proliferation, Embryonic Development, Hematological System Development and Function, Hematopoiesis, Lymphoid Tissue Structure and Development, Organ Development, Organismal Development, Tissue Development	Development of helper T lymphocytes	2.19e-10		0.769	bias	CSF2,DLL1,ICAM1,IL10,IL12B,IL12RB2,IL23A,IL27,IRF1,NFKBIZ,SOCS3,STAT1,STAT4,STAT5A,TBX21,TNFRSF25,TNFSF15,TNFSF4	18
Cellular Movement	Invasion of tumor cell lines	2.23e-10	Increased	4.79	bias	ACSL4,ADAM9,AGO2,ATF3,BATF3,CCL2,CCR7,CD9,CDCP1,CLDN4,CNDP2,CSF2,CSF3,CTSB,CTSK,CTSZ,CTTN,DRAM1,DUSP1,ECE1,EDN1,EPAS1,ESM1,EZH2,EZR,F11R,FABP5,GAB2,GDNF,GNAI1,GSDMB,HPSE,ID2,IFIT2,IL17A,ITGAV,ITGB3,ITGB8,KLF4,LGALS3,LOXL2,LPAR1,MAPK12,MET,MST1R,NOS2,NRP2,NTN1,PARVB,PPIF,PTGS2,PTPN1,PTTG1,RHOC,RUNX2,SAA1,SDC4,SFN,SIGMAR1,SMAD3,SPSB1,STAT1,STX4,TFPI2,TIAM1,TIMP1,TMEM2,TNF,TRPC6,UBD,USP2,VEGFB	72
Digestive System Development and Function	Morphology of digestive system	2.24e-10				ADA,ATF3,BID,CCK,CCR7,CDON,CISH,CSF1,CSF2,CTSA,CTSK,CYP27A1,DUSP1,ECE1,EDN1,FABP5,FADS2,FAM20A,Foxp1,FZD4,G0S2,GDNF,HEXA,HEXB,HMOX2,ID2,IFRD1,IGFBP3,IL10,IL12B,IL2RA,IL33,IL7,IL7R,IL9,INHBA,JAG1,KLF4,LGALS3,LIF,LTA,MECP2,MET,MGLL,NFIL3,NOD2,NOS2,NPC1,OSM,PLAGL2,PPARA,PTGS2,PTPN1,PTTG1,RUNX2,SAT1,SELENBP1,SLC39A14,SMAD3,SOAT1,SOCS3,STAT1,STAT4,STAT5A,TBX21,THRA,TMPRSS6,TNF,TOX,UGCG	70
Connective Tissue Disorders, Organismal Injury and Abnormalities, Skeletal and Muscular Disorders, Tissue Morphology	Damage of cartilage tissue	2.26e-10		1.908		ADAMTS4,ADAMTS5,CFB,CTSK,IL10,IL17A,IL1RN,IL27RA,IL33,IL7,NOD2,OSM,PTGIR,PTGS2,SLC39A8,SMAD3,TNF,TNFAIP6,TNFSF4	19
Organismal Injury and Abnormalities	Wound	2.45e-10		1.026	bias	ADAM9,BID,CCR7,CFB,CSF1,CSF2,CSF3,DLL4,EFNB2,GADD45A,HPSE,HSPB1,ICAM1,IL10,IL17A,ITGB3,LGALS3,MET,NOS2,OSM,PECAM1,PLA2G4A,PPARA,PRDX6,PTGS2,SDC1,SDC4,SMAD3,SORBS3,THBD,TIAM1,TNF	32
Cellular Development, Connective Tissue Development and Function, Tissue Development	Differentiation of connective tissue cells	2.51e-10	Increased	2.022		ADGRF5,ARID5A,ATF3,CCL2,CCL3L3,CCL5,CD9,CDK6,CREB3L1,CSF1,CSF2,DCSTAMP,EDN1,EFNB2,EZH2,FAM57B,FBL,GAB2,GADD45B,GDNF,GPR68,HPSE,HSD11B1,ID2,IL10,IL12B,IL17A,IL23A,IL27,IL33,IL7,INHBA,INSIG1,JAG1,KLF4,LAT,LIF,LOXL2,LPAR1,LRRC8C,MEDAG,MRAP,NOCT,NOS2,NR3C1,OSBPL8,OSM,PKIG,PPARA,PTGS2,RUNX2,SCD,SELENBP1,SEMA7A,SGK1,SH3PXD2B,SMAD3,SOCS3,STAT1,TFRC,TIMP1,TMEM120B,TNF,TOB1,TRIB3,Wfdc21,ZC3H12A	67
Inflammatory Response, Organismal Injury and Abnormalities, Renal and Urological Disease	Inflammation of urinary tract	2.55e-10	Decreased	-2.217	bias	ABCA1,CCL2,CCL22,CCL3L3,CCL4,CCL5,CD274,CFB,CSF1,CSF2,CTSL,EPAS1,GADD45A,GADD45B,GADD45G,GDNF,GPX7,HRH1,ICAM1,IDO1,IFIH1,IL10,IL12RB2,IL17A,IL1RN,IL27RA,IL9,IRF1,LIF,LTA,NOS2,NR3C1,PDE7A,PIM1,PPP3CC,PTGS2,PTTG1,SCARA5,SMAD3,TGM2,TNF,TNFAIP3	42
Cell-To-Cell Signaling and Interaction, Cellular Growth and Proliferation	Suppression of cells	2.67e-10	Increased	2.132	bias	CBLB,CCL4,CD274,CSF2,CSF3,IDO1,IL10,IL17A,IL9,MGLL,OSM,PIM1,RNF128,TBX21,TIMP1,TNF,TNFRSF18,TNFSF15	18
Cell Death and Survival	Cell death of connective tissue cells	2.83e-10		0.462		A4GALT,ATF3,ATP6AP2,BACH2,BID,BIRC3,CDK6,CFLAR,CSF1,CTSB,DUSP1,DUSP4,EFNB2,FADD,GAB1,GADD45B,GPX7,HPSE,ID2,IER3,IGFBP3,IL10,IL17A,IRF1,ITGAV,ITGB3,ITPR1,LGALS8,MCF2L,MET,MLKL,MYBL2,NFKBIB,NPC1,NR3C1,NUPR1,PIM1,PLA2G4A,PLAGL2,PLK3,PPP1R15A,PRDX6,PRNP,PTPN1,RHOB,RHOC,RUNX2,S1PR1,SAA1,SDC4,SGK1,SMAD3,STAT1,TGM1,TGM2,TIAM1,TIMP1,TNF,TNFAIP3,TNFRSF25,UBD,ZC3H12A	62
Hematological System Development and Function, Lymphoid Tissue Structure and Development, Tissue Morphology	Quantity of natural killer T lymphocytes	2.89e-10		0.947	bias	BATF,CISH,CSF2RB,EBI3,HEXB,ICAM1,ID2,IL12B,IRF1,LTA,NFIL3,RHOH,STAT1,TBX21,TNFAIP3,TOX	16
Hematological System Development and Function, Immune Cell Trafficking, Inflammatory Response, Tissue Development	Accumulation of phagocytes	2.96e-10		1.546	bias	ACKR3,CCL2,CCL5,CCR7,CSF1,CSF2,CSF3,CXCL10,CXCL2,EDN1,IL10,IL12B,IL17A,IL1RN,IL33,IL9,IRF1,IRF4,ITGA9,NOS2,NPC1,PTX3,STAT1,TIMP1,TNF	25
Cellular Development	Differentiation of leukemia cell lines	3.07e-10		1.023		CDK6,CSF1,CSF2,CSF2RB,CSF3,CTSK,EZH2,FLT3,IL1RN,INHBA,KLF4,LIF,MAPK12,MST1R,OSM,PRKX,PTGS2,PTPN1,RUNX2,SCIN,SOCS3,STAT1,THBD,TIMP1,TMBIM1,TRPC6	26
Cellular Movement	Mobilization of cells	3.25e-10	Increased	3.719	bias	CCL2,CCL20,CCL3L3,CCL4,CSF1,CSF2,CSF3,CXCL10,CXCL2,DLL4,F11R,FLT3,IL17A,IL7,S1PR5,SOCS3,STAT1,TNF	18
Cell Death and Survival	Cell death of phagocytes	3.38e-10		-0.461		ATF3,BID,BIRC3,CCL2,CCL5,CCR7,CFLAR,CSF1,CSF2,CSF3,CTSB,CXCL2,DLL1,FADD,IL10,IL17A,IL19,IL1RN,IL33,IRF1,ISG15,LGALS3,NOS2,NPC1,NR3C1,PLA2G4A,SOAT1,STAT1,STAT5A,TNF,TNFAIP3	31
Cell Death and Survival	Neuronal cell death	3.48e-10		1.314		ADA,AGAP3,AGRN,ATF3,BID,CCL2,CCL3L3,CCL4,CCL5,CDK6,CFLAR,CNTFR,CSF1,CSF3,CTSB,CTSZ,DUSP1,EFNB2,FADD,GAB2,GAL,GDA,GDNF,GJB2,HMOX2,HSPB1,ID2,IGFBP3,IL10,IL1RN,INHBA,ITPR1,LGALS3,LIF,LTA,MAPK12,MECP2,MET,MYBL2,NFIL3,NFKBIB,NLRP8,NOS2,NPC1,NR3C1,NTN1,OPTN,OSM,PLA2G4A,PPIF,PPP1R13B,PRNP,PTGS2,RNF19A,SGK1,SIGMAR1,SMAD3,STAM,STAT1,STX1B,TGM1,TGM2,TMEM158,TNF,TNFRSF21,TRIB3,TRIM2,VEGFB,WFS1	69
Endocrine System Disorders, Gastrointestinal Disease, Metabolic Disease, Organismal Injury and Abnormalities	Diabetes mellitus	3.72e-10		1.488		ABCA1,BACH2,BATF3,CARS,CBLB,CCL2,CCL22,CCL3L3,CCL4,CCL5,CCR7,CD274,CFB,CHI3L1,CISH,COL27A1,CTSB,CTSK,CTSL,CXCL10,DDX25,DUSP1,EDN1,FADD,FADS2,GAL,GBP2,GBP6,GPD2,HCAR3,HERC6,HMGCR,HPSE,HRH1,HSD11B1,HSPB1,ICAM1,IFIH1,IFIT2,IFIT3,IL10,IL12B,IL17A,IL18BP,IL1RN,IL2RA,IRF1,IRF4,ITGAV,ITGB3,ITIH4,ITPR1,KCNJ2,KIAA1671,KLF4,LAT,LGALS3,LTA,MRC1,NOD2,NOS2,NR3C1,PDE1B,PDE7A,PECAM1,PPARA,PPP3CC,PRUNE2,PTGIR,PT…	97
Connective Tissue Development and Function, Tissue Morphology	Quantity of connective tissue	3.78e-10	Increased	2.547	bias	ABCA1,CCL2,CD83,CD9,CDK6,CSF1,CSF2,CSF3,CTSK,CYP27B1,DGAT2,DUSP1,EPAS1,EZH2,FABP5,FLT3,G0S2,GAB2,GDNF,GPD2,GPR68,HEXB,HRH1,HSD11B1,ID2,IGFBP3,IL10,IL1RN,IL23A,INHBA,INSIG1,ITGB3,KLF4,LIF,LPAR1,LTA,MYBL2,NFIL3,NMB,NOS2,NR3C1,PIM1,PLA2G4A,PPARA,PPP1R15A,PTPN1,RUNX2,S1PR1,SCD,SDC3,SH3PXD2B,SMAD3,SOCS3,STAT1,STAT5A,TFRC,TGM2,THRA,TMPRSS6,TNF,TOB1,UGCG	62
Cell Death and Survival, Cellular Compromise	Cytotoxicity of leukocytes	3.89e-10	Increased	3.105	bias	ARL8B,CBLB,CCL2,CCL5,CD274,CD48,CFLAR,CSF2,FADD,ICAM1,IL10,IL12B,IL23A,IL27,IL7,LAT,LGALS3,MYBL2,NOS2,NPC1,PNP,STAT1,STAT4,TBX21,TNF,ULBP3	26
Cardiovascular System Development and Function	Vascularization	3.98e-10	Increased	3.453	bias	ADAM9,CFB,CSF1,CSF2,CSF3,EFNB2,EPAS1,HPSE,ICAM1,IGFBP3,IL10,IL12RB2,IL17A,IL1RN,INHBA,ITGB3,ITGB8,LGALS3,LIF,MST1R,NOS2,NR3C1,NRP2,NTN1,PLA2G4A,PTGS2,SDC4,SOCS3,STAT5A,TIMP1,TNF,TNFAIP3,VEGFB	33
Organismal Injury and Abnormalities, Tissue Morphology	Size of lesion	4.14e-10				ARG2,BID,CBR3,CSF1,CSF2,CSF3,CTSB,CTSZ,EHF,GDNF,ICAM1,IDO1,IL10,IL17A,IL18BP,IL1RN,IL33,IRF1,ITGB3,LGALS3,LTA,MET,MST1R,MYBL2,NOS2,NR3C1,OSM,PIM1,PLA2G4A,PPARA,PPIF,PRNP,PTGS2,PTX3,SOAT1,SOCS3,STAT1,TGM2,THBD,TIMP1,TNFAIP3,TNFSF4	42
Immunological Disease	Immediate hypersensitivity	4.15e-10		0.016		ABCA1,CCL20,CCL22,CCL5,CISH,CSF2RB,CTSL,DUSP1,DUSP2,FABP5,FADS2,GAB2,GADD45A,HRH1,IL10,IL17A,IL1RN,IL2RA,IL33,IL9,LAT,MXI1,NFKBIZ,NR3C1,OPTN,OSM,PECAM1,PLA2G4A,PPARA,PPP3CC,PTGES2,PTGS2,S100A2,STAT1,TGM3,TIMP1,TNF,TNFAIP3,TUBB1,ZNF331	40
Gastrointestinal Disease, Organismal Injury and Abnormalities	Benign oral disorder	5.11e-10				ATP6V1B2,CCL20,CCL22,CCL3L3,CCL4,CCL5,CCR7,CDON,CSF1,CSF2,CXCL10,CYP3A4,EDN1,FAM20A,GBP2,GPR68,IFIH1,IFIT3,IL10,IL12B,IL17A,IL1RN,IL7,INSIG1,IRF1,ITGAV,ITGB8,KCNJ2,LIF,LOXL3,LTA,NR3C1,OSM,PPP3CC,PTGS2,SMAD3,SOCS3,STAT1,STAT4,TGIF1,TIMP1,TM4SF1,TNF,TRPM6,TUBA1C,TUBB1,UBD	47
Cell Morphology	Polarization of blood cells	5.28e-10	Increased	3.755	bias	CCL22,CCL5,CCR7,CSF1,CSF2,CSF3,CXCL10,EBI3,GNAI1,IL10,IL12B,IL12RB2,IL1RN,IL27,IL33,IRF4,SLAMF1,SOCS3,STAT4,TBX21,TIAM1,TNF	22
Cell-To-Cell Signaling and Interaction, Cellular Movement, Hematological System Development and Function, Immune Cell Trafficking	Recruitment of mononuclear leukocytes	5.37e-10	Increased	3.579	bias	CCL2,CCL20,CCL22,CCL4,CCL5,CCR7,CSF1,CSF2,CSF3,CXCL10,FABP5,ICAM1,IL10,IL17A,IL23A,IL33,LTA,NOD2,OSM,PELI1,S1PR1,STAT5A,TNF	23
Cell Death and Survival, Cellular Compromise	Cytotoxicity of lymphocytes	5.46e-10	Increased	2.985	bias	ARL8B,CBLB,CCL2,CCL5,CD274,CD48,CFLAR,FADD,ICAM1,IL10,IL12B,IL23A,IL27,IL7,LAT,LGALS3,MYBL2,NOS2,NPC1,PNP,STAT1,STAT4,TBX21,TNF,ULBP3	25
Cell Death and Survival	Apoptosis of T lymphocytes	5.64e-10		-0.744		ADA,BID,CCDC86,CCL4,CCL5,CD274,CD9,CFLAR,CHI3L1,DLL4,DUSP5,EZR,FADD,GIMAP4,ICAM1,IDO1,IER3,IL10,IL27,IL2RA,IL7,IL7R,IRF4,LGALS3,MET,NOS2,NR3C1,PECAM1,PNP,RHOH,SERPINB9,STAT1,STAT5A,TNF,TNFRSF18,TNFRSF25	36
Cell-To-Cell Signaling and Interaction	Binding of connective tissue cells	5.96e-10	Increased	2.558	bias	CCL2,CSF1,CSF2,DCSTAMP,EFNB2,FERMT2,GAB1,ICAM1,IGFBP3,IL27,ITGA9,ITGAV,ITGB3,JAG1,LGALS8,LTBP2,MET,PMP22,RHOB,RND1,RUNX2,SDC1,SDC4,TGM2,THRA,TLN2,TNF	27
Cancer, Gastrointestinal Disease, Organismal Injury and Abnormalities	Large intestine neoplasm	6.06e-10		0.465		ABCA1,ABCA9,ABHD2,ABTB2,ACKR3,ACSL4,ACSL5,ADA,ADAM9,ADAMTS4,ADAMTS5,ADHFE1,AFF1,AGAP3,AGRN,AKAP6,ALAS1,AMPD1,ANKRD28,ANKRD33B,ANO8,AP4S1,APOBEC3A,APOLD1,ARAP2,ARHGAP28,ARHGAP35,ARHGEF16,ARHGEF3,ARID5A,ARL11,ARL5B,ATF3,ATIC,ATP1A1,ATP6AP2,ATP8A1,ATP8B1,AXDND1,B4GALT5,B4GALT6,BACH2,BATF,BBS2,BCAS1,BFAR,BHLHE40,BID,BLNK,BOC,C15orf59,C20orf96,C9orf72,CACHD1,CAMK2N1,CARS,CBLB,CBLN3,CBR3,CCDC86,CCL2,CC…	458
Cellular Development, Cellular Growth and Proliferation, Hematological System Development and Function, Hematopoiesis, Lymphoid Tissue Structure and Development, Tissue Development	Dendropoiesis	6.13e-10	Increased	3.181	bias	BATF,BATF3,CCL2,CSF1,CSF2,CSF3,DCSTAMP,DLL1,FADD,FLT3,ID2,IL10,IL1RN,IL2RA,IRF4,JAG1,LTA,NFIL3,STAT1,STAT5A,TNF,TNFSF15,UBD	23
Dermatological Diseases and Conditions, Organismal Injury and Abnormalities	Exanthem of skin	6.13e-10				CAMK2N1,CCL2,CCL20,CSF2,CXCL10,EFNB2,FABP5,GJB2,HRH1,IL12B,IL17A,IL2RA,LGALS3,LTA,NOS2,NR3C1,NRP2,RAB38,SFN,STAT1,TCN1,TLE3,TNF	23
Cell Cycle	Interphase	6.17e-10		0.632	bias	APOBEC3A,ATF3,BHLHE40,BID,CAMK2N1,CDK6,CNDP2,CSF1,CSF2,CSF3,DOT1L,DUSP1,DUSP4,EZH2,FADD,FAM92A,FBXL2,FLT3,GAB1,GADD45A,GADD45B,GADD45G,GRK4,ID2,IER3,IGFBP3,IL10,IL7,INHBA,ITGAV,KLF4,LGALS3,LIF,MAPK12,MEIS2,MET,MS4A3,MST1R,MXI1,MYBL1,MYBL2,NOCT,NR3C1,OSGIN1,OSM,PIM1,PLA2G4A,PLK2,PLK3,PPARA,PPIF,PRNP,PTGS2,PTTG1,RASSF3,RUNX2,SDC3,SFN,SGK1,SMARCA1,STAT1,STX4,TCF19,TFRC,TIMP1,TNF,TNFSF15	67
Cellular Movement	Migration of myeloid cells	6.22e-10	Increased	3.467	bias	CCL2,CCL3L3,CCL4,CCL5,CCR7,CSF1,CSF2,CSF3,CXCL10,CXCL2,F11R,ICAM1,IGFBP3,IL17A,IL33,ITGAV,ITGB3,MAPK12,NOS2,NTN1,P2RY6,PECAM1,PRNP,S1PR1,SAA1,TBX21,TGM2,TNF	28
Cellular Development, Cellular Function and Maintenance, Cellular Growth and Proliferation	Assembly of cells	6.26e-10		1.784	bias	CCL2,CCR7,CD9,CSF1,CSF2,CTSB,CXCL10,CXCL2,DLL4,EDN1,EFNB2,F11R,HRH1,IL10,IL17A,IL1RN,INHBA,ITGB3,KCNJ2,LGALS3,LOXL2,MET,NRP2,NTN1,OSM,PECAM1,PIM1,PLA2G4A,PPARA,PRKX,PTGIR,PTGS2,PTPN1,RUNX2,SAA1,SDC4,SMAD3,STAT1,STAT5A,TNF,TNFRSF25,TNFSF15,VEGFB	43
Antimicrobial Response, Inflammatory Response	Antiviral response	6.29e-10	Increased	2.578	bias	APOBEC3A,BATF3,BIRC3,CCL22,CCL4,CCL5,CCL8,CCR7,CXCL10,FADD,IFIH1,IFIT2,IFIT3,IL12B,IL23A,IL27,IL33,IRF1,ISG15,ISG20,LAMTOR5,MST1R,OSM,RSAD2,SOCS3,STAT1,TNF,TNFSF4,ZC3H12A	29
Hematological System Development and Function, Hematopoiesis, Tissue Morphology	Quantity of hematopoietic progenitor cells	6.3e-10	Increased	2.631		AFF1,ATP6AP2,BHLHE40,BLNK,CCR7,CD83,CD9,CDK6,CRLF2,CSF1,CSF2,CSF3,DLL4,DUSP5,EFNB2,EPAS1,EZH2,FADD,FLT3,GADD45A,IL10,IL12B,IL7,IL7R,INHBA,IRF1,IRF4,ITGB3,KLF4,LAT,LIF,MYBL2,NOD2,NOS2,NR3C1,OSM,PECAM1,PIM1,PNP,RHOH,RUNX2,SOCS3,STAM,STAT4,STAT5A,TFRC,TMPRSS6,TNF,TNFAIP3,TOX	50
Cardiovascular System Development and Function	Neovascularization of organ	6.61e-10	Increased	2.511	bias	ADAM9,CFB,EFNB2,EPAS1,ICAM1,IGFBP3,IL10,IL17A,INHBA,ITGB3,LGALS3,LIF,NOS2,NR3C1,NTN1,PLA2G4A,PTGS2,SOCS3,TIMP1,TNF,VEGFB	21
Cancer, Gastrointestinal Disease, Organismal Injury and Abnormalities	Intestinal tumor	6.86e-10		0.034	bias	ABCA1,ABCA9,ABHD2,ABTB2,ACKR3,ACSL4,ACSL5,ADA,ADAM9,ADAMTS4,ADAMTS5,ADHFE1,AFF1,AGAP3,AGRN,AKAP6,ALAS1,AMPD1,ANKRD28,ANKRD33B,ANO8,AP4S1,APOBEC3A,APOLD1,ARAP2,ARHGAP28,ARHGAP35,ARHGEF16,ARHGEF3,ARID5A,ARL11,ARL5B,ATF3,ATIC,ATP1A1,ATP6AP2,ATP8A1,ATP8B1,AXDND1,B4GALT5,B4GALT6,BACH2,BATF,BBS2,BCAS1,BFAR,BHLHE40,BID,BLNK,BOC,C15orf59,C20orf96,C9orf72,CACHD1,CAMK2N1,CARS,CBLB,CBLN3,CBR3,CCDC86,CCL2,CC…	459
Cancer, Organismal Injury and Abnormalities	Breast or colorectal cancer	7.8e-10		-0.677		ABCA1,ABCA9,ABHD2,ACKR3,ACSL5,ADA,ADAM9,ADAMTS4,ADAMTS5,ADGRF5,AFF1,AGAP3,AGO2,AGRN,AKAP6,ALAS1,AMPD1,ANKRD28,AP4S1,ARAP2,ARHGAP35,ARHGEF16,ARHGEF3,ATF3,ATIC,ATP6AP2,ATP8A1,ATP8B1,AXDND1,BACH2,BATF,BCAS1,BHLHE40,BOC,C15orf59,C3orf20,CAMK2N1,CARS,CBLN3,CCL2,CCL4,CCL5,CCR7,CD274,CD48,CD9,CDCP1,CDH23,CDK6,CDON,CEMIP,CFB,CFLAR,CHI3L1,CLDN4,CMAS,CNDP2,CNTFR,COL27A1,CRLF2,CSF1,CSF2,CSF2RB,CSF3,CTSA,CTS…	346
Cancer, Organismal Injury and Abnormalities	Benign neoplasia	8.39e-10		0.606	bias	ACKR3,AFF1,AGRN,ARHGAP35,ATP1A1,ATP6V1B2,ATP8B1,BID,CCK,CCL4,CD274,CD48,CEMIP,COL27A1,CRLF2,CSF1,CSF2,CSF2RB,CTSB,DGAT2,DLL1,DUSP1,DUSP5,ENC1,EXT1,EZH2,FABP5,FAM20A,FERMT2,FLT3,GADD45A,GLUL,HOPX,HPSE,HSD11B1,IFIH1,IFIT3,IGFBP3,IL17A,INHBA,ITM2C,JAG1,KLF4,LGALS3,LPAR1,MET,MFHAS1,MST1R,MXRA5,MYBL1,MYBL2,NR3C1,NR6A1,NRP2,PARP3,PISD,PPA1,PPARA,PRDX6,PSAT1,PTGS2,PTTG1,RAB9A,RELL1,ROS1,S100A2,SCARA5,SC…	87
Cell-To-Cell Signaling and Interaction, Cellular Growth and Proliferation, Hematological System Development and Function	Induction of lymphocytes	8.72e-10		1.514	bias	CD274,CD83,IL10,IL12B,IL17A,IL1RN,IL23A,IL27,IL27RA,IL33,IL7,NOS2,SMAD3,STEAP1,TNFAIP3	15
Dermatological Diseases and Conditions, Organismal Injury and Abnormalities	Plaque psoriasis	9.22e-10				CAMK2N1,CCL2,CCL20,CSF2,CXCL10,EFNB2,FABP5,GJB2,IL12B,IL17A,IL2RA,LGALS3,LTA,NOS2,NR3C1,NRP2,RAB38,SFN,STAT1,TCN1,TLE3,TNF	22
Cardiovascular Disease, Organismal Injury and Abnormalities	Infarction	9.91e-10	Decreased	-2.552		ATP1A1,BID,CCL3L3,CSF1,CSF3,EDN1,GDNF,HMGCR,HRH1,HSPB1,IL10,IL17A,IL1RN,IRF1,ITGAV,ITGB3,KCNJ2,LTA,NOS2,OSM,PDE10A,PECAM1,PIM1,PLA2G4A,PLK2,PPARA,PPIF,PPP3CC,PRNP,PTGS2,PTX3,SOAT1,STAT1,TGM2,THBD,THRA,TIMP1,TNF,TNFAIP3,TNFSF4,TUBA1C,TUBB1	42
Lipid Metabolism, Molecular Transport, Small Molecule Biochemistry	Concentration of phospholipid	1.03e-09		0.745		ABCA1,ADA,AGPAT4,BID,CSF1,CSF3,CYP27A1,DGAT2,EZH2,IL17A,INSIG1,LGALS8,MRAS,NOD2,NPC1,NPC2,OSBPL8,PLA2G4A,PLTP,PNPLA8,PPARA,PRDX6,PTGS2,SAA1,SCD,SGMS2,SMAD3,TNF,UGCG	29
Cellular Movement	Chemotaxis of myeloid cells	1.05e-09	Increased	4.514	bias	CCL2,CCL20,CCL22,CCL3L3,CCL4,CCL5,CCL8,CCR7,CD9,CSF1,CSF2,CXCL10,CXCL2,EDN1,ICAM1,IL10,IL12B,IL17A,IL23A,IL33,INHBA,ITGA9,ITGB3,LGALS3,LTB4R,NOD2,PPARA,PRNP,RHOB,SAA1,SLAMF1,SLAMF8,SMAD3,TNF,TNFSF18,TRPC6,TRPV2	37
Cellular Growth and Proliferation	Cell proliferation of hematopoietic cell lines	1.08e-09	Increased	3.839	bias	ATIC,CNTFR,CRLF2,CSF1,CSF2,CSF2RB,CSF3,EZH2,FLT3,GAB1,GAB2,GADD45B,GADD45G,IL10,IL12RB2,IL1RN,IL23A,IL7,IL7R,IL9,INHBA,LIF,MET,MRAS,MYBL1,MYBL2,OSM,PIM1,RHOH,SFN,SOCS3,STAT5A,TNF,TNFSF15	34
Cellular Movement	Cell movement of cancer cells	1.09e-09	Increased	2.157	bias	CCL2,CCL5,CCR7,CSF1,CSF3,CTSB,DUSP1,EMILIN2,EZH2,EZR,GAB2,GDNF,HPSE,KLF4,MET,MGLL,MST1R,PTTG1,RHOB,S100A2,STAT1,TIAM1,TM4SF1,TNF	24
Cellular Movement, Hematological System Development and Function	Mobilization of blood cells	1.11e-09	Increased	3.786	bias	CCL2,CCL20,CCL3L3,CCL4,CSF1,CSF2,CSF3,CXCL10,CXCL2,F11R,FLT3,IL17A,IL7,S1PR5,STAT1,TNF	16
Cardiovascular System Development and Function, Tissue Development	Development of endothelial tissue	1.12e-09		1.809	bias	CCL2,CCR7,CD9,CSF1,CSF2,CTSB,CXCL10,CXCL2,DLL4,EDN1,EFNB2,F11R,HRH1,IL10,IL17A,IL1RN,INHBA,ITGB3,KCNJ2,LGALS3,LOXL2,MET,NRP2,NTN1,OSM,PECAM1,PIM1,PLA2G4A,PPARA,PRKX,PTGIR,PTGS2,PTPN1,RHOB,RUNX2,SAA1,SDC4,STAT1,STAT5A,TNF,TNFRSF25,TNFSF15,VEGFB	43
Gene Expression	Transcription	1.15e-09	Increased	2.702		AFF1,AGO2,AGRN,ANKRD33,ARHGAP35,ARID5A,ATF3,ATP8B1,BACH2,BAMBI,BATF,BATF3,BBS2,BHLHE40,BID,BLNK,CCL2,CCL3L3,CCL5,CD9,CDK6,CDON,CFLAR,CISH,CSF1,CSF2,CSF2RB,CSF3,CXCL10,DLL1,DLL4,DOT1L,DUSP1,DUSP4,DUSP5,EDN1,EHF,EID2,EPAS1,ETV3,EZH2,EZR,FADD,FNIP2,FOXK1,Foxp1,FZD4,GAB2,GADD45A,GADD45G,GAL,GBP2,GBP6,GDNF,GEM,GTF2H1,HEXB,HOPX,HPSE,ID2,IFRD1,IL10,IL17A,IL1RN,IL23A,IL33,IL7,IL7R,INHBA,IRF1,IRF4,ITGB3,I…	153
Cancer, Organismal Injury and Abnormalities, Reproductive System Disease	Mammary tumor	1.17e-09		0.544		ABCA1,ADAM9,ADAMTS4,ADAMTS5,ADGRF5,AGO2,AMPD1,ARHGAP35,ATF3,BHLHE40,C3orf20,CBR3,CCL2,CCL4,CCL5,CCR7,CD274,CD48,CD9,CDCP1,CDK6,CHI3L1,CLDN4,CNDP2,COL27A1,CSF1,CSF2RB,CSF3,CTSB,CTSK,CTSZ,CTTN,CXCL10,CXCL2,CYP3A4,DENND2D,DOT1L,DUSP1,DUSP2,DUSP4,EDN1,EMILIN2,EPAS1,EVPL,EZH2,F11R,FABP5,FADD,FAM111B,FERMT2,FLT3,G0S2,GADD45A,GADD45B,GBP2,GFPT2,GJB2,GLB1L3,GLUL,GPX7,GSDMB,HMGCR,HRH1,HSPB1,HUNK,IER3,IGFB…	142
Hematological System Development and Function, Hypersensitivity Response, Tissue Morphology	Quantity of eosinophils	1.18e-09		-0.243		ADA,CCL22,CISH,CSF2,CSF2RB,DUSP5,GADD45A,HPSE,ICAM1,IGFBP3,IL10,IL17A,IL33,IL9,ITPR1,LGALS3,LIF,NOS2,STAT4,TNF,TNFRSF25	21
Lipid Metabolism, Molecular Transport, Small Molecule Biochemistry	Concentration of acylglycerol	1.21e-09		-0.234		ABCA1,BHLHE40,CSF2,CYP27A1,CYP3A4,DGAT2,DUSP1,EDN1,ELOVL5,FABP5,FADS2,G0S2,GBP5,GPD2,HRH1,HSD11B1,HSD3B7,IFRD1,IL10,INSIG1,LGALS3,LIF,LPGAT1,MECP2,MGLL,MPC1,NEU1,NFIL3,NOS2,OSBPL8,PLAGL2,PLTP,PMP22,PNPLA8,PPARA,PPP1R3C,PTGS2,PTPN1,SCD,SGMS2,THRA,TNF	42
Immunological Disease	Delayed hypersensitive reaction	1.21e-09		1.457	bias	CCL2,CCL5,CCR7,CD83,CSF2,CXCL10,F11R,GADD45G,ICAM1,IDO1,IL10,IL12B,IL27,IL27RA,LAPTM5,MST1R,NOS2,S100A2,SDC1,THBD,TNF,TNFSF4	22
Cellular Function and Maintenance	Engulfment of cells	1.25e-09	Increased	5.473	bias	ABCA1,ADAMTS5,ATP6V0D1,ATP6V1B2,BTBD19,CCL4,CCL5,CCR7,CD48,CLIC3,CSF1,CSF2,CSF2RB,CSF3,CXCL10,DLL1,EPB41L2,EZR,GAB2,ICAM1,IL10,IL12B,IL33,IL7,ISG15,ITGAV,LAT,LGALS3,LTB4R,MEGF10,MRC1,NEDD4L,NOD2,NR3C1,PECAM1,PELI1,PLA2G4A,PRKX,PTPN1,PTX3,RHOB,SAA1,SNX5,SOAT1,TGM2,TNF,TRPV2,USP2	48
Cardiovascular System Development and Function	Morphology of cardiovascular system	1.27e-09				ABCA1,ACKR3,ADA,ADAM9,AGO2,ARG2,ATF3,BIRC3,CCL2,CDK6,CDON,CFLAR,CSF3,CTSB,CTTN,CXCL10,DLL4,DOT1L,DUSP1,DUSP5,ECE1,EDN1,EFNB2,EPAS1,F11R,FADD,Foxp1,GAB1,GADD45A,GAL,GDNF,GJA5,GPX7,HMGCR,HMOX2,HOPX,IER3,IL10,IL1RN,IL33,INHBA,ITGAV,ITGB3,ITGB8,JAG1,KLF15,KLF4,LIF,LOXL2,LTB4R,NEDD4L,NOS2,NR6A1,OSM,P2RY6,PIM1,PLA2G15,PLA2G4A,PPARA,PPP1R15A,PPP1R3C,PTGIR,PTGS2,RHOB,SMAD3,SPINT1,TFRC,TGM2,THBD,THRA,TIAM…	78
Infectious Diseases	Infection by Herpesviridae	1.28e-09		-0.16		ADA,CCL2,CCL3L3,CCL4,CCL5,CSF2RB,CXCL10,HMGCR,IL10,IL17A,IL1RN,IL2RA,IRF1,NFKBIZ,NR3C1,PPP3CC,PRNP,STAT1,TNF	19
Drug Metabolism, Lipid Metabolism, Small Molecule Biochemistry	Synthesis of prostaglandin E2	1.33e-09	Increased	2.592	bias	ACSL4,CD83,CNTFR,CSF1,CSF2,EDN1,IL10,IL17A,IL1RN,IL27,NOS2,NPC1,NPC2,NTN1,PLA2G4A,PNPLA8,PRNP,PTGES2,PTGS2,S1PR1,SMAD3,SOAT1,TNF	23
Lipid Metabolism, Molecular Transport, Small Molecule Biochemistry	Quantity of polyunsaturated fatty acids	1.38e-09		1.876	bias	ACSL4,CSF2,DUSP1,EDN1,ELOVL5,FABP5,FADS2,GNAI1,IL10,IL18BP,IL1RN,IL9,LIF,NOS2,NTN1,PLA2G4A,PNPLA8,PRNP,PTGIR,PTGS2,SCD,TNF	22
Cell Morphology	Polarization of mononuclear leukocytes	1.46e-09	Increased	3.394	bias	CCL22,CCR7,CSF1,CSF3,EBI3,IL10,IL12B,IL12RB2,IL27,IL33,IRF4,SLAMF1,SOCS3,STAT4,TBX21,TIAM1,TNF	17
Neurological Disease	Demyelination	1.57e-09	Increased	2.105	bias	CCL2,CCL3L3,CCL5,CSF1,CSF2,CSF3,CXCL10,CYP27A1,IL10,IL12B,IL12RB2,IL27RA,LIF,LPAR1,NR3C1,PMP22,PTGS2,S1PR1,TNF,TNFAIP3,TNFRSF21	21
Cellular Development, Cellular Growth and Proliferation, Hematological System Development and Function	Cell proliferation of leukocyte cell lines	1.6e-09	Increased	4.009	bias	ATIC,CNTFR,CRLF2,CSF1,CSF2,CSF2RB,CSF3,EZH2,FLT3,GAB1,GAB2,GADD45B,GADD45G,IL10,IL12RB2,IL1RN,IL23A,IL7,IL7R,IL9,INHBA,LIF,MET,MRAS,MYBL2,OSM,PIM1,RHOH,SFN,SOCS3,STAT5A,TNF	32
Lipid Metabolism, Small Molecule Biochemistry	Synthesis of prostaglandin	1.66e-09	Increased	2.861	bias	ACSL4,CD83,CNTFR,CSF1,CSF2,EDN1,HRH1,IL10,IL17A,IL1RN,IL27,IL33,NOS2,NPC1,NPC2,NTN1,PLA2G4A,PLA2G4F,PNPLA8,PRNP,PTGES2,PTGS2,S1PR1,SMAD3,SOAT1,TNF	26
Cardiovascular System Development and Function, Cellular Development, Cellular Function and Maintenance, Cellular Growth and Proliferation, Organismal Development, Tissue Development	Endothelial cell development	1.67e-09		1.658	bias	CCL2,CCR7,CD9,CSF1,CSF2,CTSB,CXCL10,CXCL2,DLL4,EDN1,EFNB2,F11R,HRH1,IL10,IL17A,IL1RN,INHBA,ITGB3,KCNJ2,LGALS3,LOXL2,MET,NRP2,NTN1,OSM,PECAM1,PIM1,PLA2G4A,PPARA,PRKX,PTGIR,PTGS2,PTPN1,RUNX2,SAA1,SDC4,STAT1,STAT5A,TNF,TNFRSF25,TNFSF15,VEGFB	42
Inflammatory Disease, Inflammatory Response, Organismal Injury and Abnormalities, Renal and Urological Disease	Nephritis	1.67e-09	Decreased	-2.367	bias	ABCA1,CCL2,CCL22,CCL3L3,CCL4,CCL5,CD274,CFB,CSF1,CSF2,CTSL,EPAS1,GADD45A,GADD45B,GADD45G,GDNF,GPX7,HRH1,ICAM1,IDO1,IFIH1,IL10,IL12RB2,IL17A,IL1RN,IL27RA,IL9,IRF1,LIF,LTA,NOS2,NR3C1,PDE7A,PIM1,PPP3CC,PTGS2,SMAD3,TGM2,TNF,TNFAIP3	40
Cardiovascular System Development and Function, Cellular Development, Cellular Function and Maintenance, Cellular Growth and Proliferation, Organismal Development, Tissue Development	Proliferation of endothelial cells	1.71e-09		1.019		CCL2,CCR7,CSF1,CSF2,CTSB,CXCL10,DLL4,EDN1,EFNB2,F11R,HRH1,IL10,IL17A,IL1RN,INHBA,ITGB3,KCNJ2,LOXL2,NRP2,NTN1,OSM,PECAM1,PIM1,PLA2G4A,PPARA,PRKX,PTGIR,PTGS2,PTPN1,RUNX2,SAA1,SDC4,STAT1,STAT5A,TNF,TNFRSF25,TNFSF15,VEGFB	38
Cancer, Gastrointestinal Disease, Organismal Injury and Abnormalities	Malignant neoplasm of large intestine	1.74e-09		0.894		ABCA1,ABCA9,ABHD2,ABTB2,ACKR3,ACSL4,ACSL5,ADA,ADAM9,ADAMTS4,ADAMTS5,ADHFE1,AFF1,AGAP3,AGRN,AKAP6,ALAS1,AMPD1,ANKRD28,ANKRD33B,ANO8,AP4S1,APOBEC3A,APOLD1,ARAP2,ARHGAP28,ARHGAP35,ARHGEF16,ARHGEF3,ARID5A,ARL11,ARL5B,ATF3,ATIC,ATP1A1,ATP6AP2,ATP8A1,ATP8B1,AXDND1,B4GALT5,B4GALT6,BACH2,BATF,BBS2,BCAS1,BFAR,BHLHE40,BID,BLNK,BOC,C15orf59,C20orf96,C9orf72,CACHD1,CAMK2N1,CARS,CBLB,CBLN3,CBR3,CCDC86,CCL2,CC…	454
Cancer, Gastrointestinal Disease, Organismal Injury and Abnormalities	Intestinal cancer	1.77e-09		0.513	bias	ABCA1,ABCA9,ABHD2,ABTB2,ACKR3,ACSL4,ACSL5,ADA,ADAM9,ADAMTS4,ADAMTS5,ADHFE1,AFF1,AGAP3,AGRN,AKAP6,ALAS1,AMPD1,ANKRD28,ANKRD33B,ANO8,AP4S1,APOBEC3A,APOLD1,ARAP2,ARHGAP28,ARHGAP35,ARHGEF16,ARHGEF3,ARID5A,ARL11,ARL5B,ATF3,ATIC,ATP1A1,ATP6AP2,ATP8A1,ATP8B1,AXDND1,B4GALT5,B4GALT6,BACH2,BATF,BBS2,BCAS1,BFAR,BHLHE40,BID,BLNK,BOC,C15orf59,C20orf96,C9orf72,CACHD1,CAMK2N1,CARS,CBLB,CBLN3,CBR3,CCDC86,CCL2,CC…	455
Antimicrobial Response, Inflammatory Response	Antimicrobial response	1.83e-09	Increased	2.765	bias	ADAMTS4,ADAMTS5,APOBEC3A,BATF3,BIRC3,CCL22,CCL4,CCL5,CCL8,CCR7,CXCL10,FADD,IFIH1,IFIT2,IFIT3,IL10,IL12B,IL17A,IL23A,IL27,IL27RA,IL33,IRF1,ISG15,ISG20,LAMTOR5,MST1R,NOD2,NOS2,OSM,RSAD2,SERPINB9,SLAMF8,SOCS3,STAT1,TNF,TNFSF4,ZC3H12A	38
Gene Expression	Transcription of RNA	1.84e-09	Increased	2.491		AFF1,AGO2,AGRN,ANKRD33,ARHGAP35,ARID5A,ATF3,ATP8B1,BACH2,BAMBI,BATF,BATF3,BHLHE40,BID,BLNK,CCL2,CCL3L3,CD9,CDK6,CDON,CFLAR,CISH,CSF1,CSF2,CSF2RB,CSF3,CXCL10,DLL1,DLL4,DOT1L,DUSP1,DUSP4,DUSP5,EDN1,EHF,EID2,EPAS1,ETV3,EZH2,EZR,FADD,FNIP2,FOXK1,Foxp1,FZD4,GAB2,GADD45A,GADD45G,GAL,GBP2,GBP6,GDNF,GEM,GTF2H1,HEXB,HOPX,HPSE,ID2,IFRD1,IL10,IL17A,IL23A,IL33,INHBA,IRF1,IRF4,JAG1,KLF15,KLF4,LAT,LBH,LIF,LOXL…	139
Skeletal and Muscular System Development and Function	Osteoclastogenesis	1.98e-09		1.827		CCL2,CD9,CSF1,CSF2,DCSTAMP,DLL1,IFRD1,IL17A,IL1RN,IL23A,IL7,IL7R,ITGB3,LPAR1,NFKBIB,OSM,SCIN,STAT1,TNF,TNFAIP3	20
Cell Morphology	Morphology of mononuclear leukocytes	2e-09				BACH2,BATF,BLNK,CBLB,CCDC86,CD274,CSF1,EBI3,Foxp1,ID2,IL10,IL1RN,IL2RA,IL7,IL7R,IRF1,IRF4,ITPKC,LAT,LGALS3,LTA,MXI1,NFIL3,NFKBIZ,RHOH,SERPINB9,TBX21,TNF,TOX	29
Hematological System Development and Function, Inflammatory Response, Tissue Morphology	Quantity of dendritic cells	2.05e-09		1.702	bias	ADA,BATF3,CCL2,CCL20,CCR7,CD83,CSF1,CSF2,CSF3,FLT3,ID2,IDO1,IL10,IL12RB2,IL1RN,IL7R,IRF1,IRF4,LGALS3,LTA,NOS2,TNF	22
Cancer, Organismal Injury and Abnormalities, Tumor Morphology	Progression of tumor	2.05e-09	Increased	2.557	bias	ACKR3,ATIC,CCL5,CD274,CDK6,CDON,CSF1,CSF2,CSF2RB,CTSK,EDN1,EZH2,EZR,FERMT2,FLT3,HPSE,IL2RA,LOXL2,MET,MST1R,NR3C1,NRP2,PARP3,PTGS2,ROS1,SAT1,STAT1,STAT5A,THBD,TIMP1,TNF,TUBA1C,TUBB1,VEGFB	34
Cell-To-Cell Signaling and Interaction, Cellular Movement, Hematological System Development and Function, Immune Cell Trafficking	Recruitment of lymphocytes	2.06e-09	Increased	3.047	bias	CCL2,CCL20,CCL22,CCL4,CCL5,CCR7,CSF2,CSF3,CXCL10,FABP5,ICAM1,IL10,IL33,LTA,OSM,PELI1,S1PR1,STAT5A,TNF	19
Cell Morphology, Immunological Disease	Abnormal morphology of leukocytes	2.07e-09				AFF1,BACH2,BATF,BHLHE40,BLNK,CBLB,CCDC86,CD274,CSF1,EBI3,ID2,IL10,IL1RN,IL2RA,IL7,IL7R,IRF1,IRF4,ITPKC,LAT,LGALS3,LTA,MXI1,NFIL3,NFKBIZ,RHOH,SERPINB9,TBX21,TNF,TOX	30
Cell Morphology	Orientation of cells	2.07e-09	Increased	3.215	bias	CCL2,CCL22,CCL5,CCR7,CSF1,CSF2,CSF3,CXCL10,EBI3,GAB1,GDNF,GNAI1,IL10,IL12B,IL12RB2,IL1RN,IL27,IL33,IRF4,ITGB3,SDC4,SLAMF1,SOCS3,STAT4,TBX21,TIAM1,TIMP1,TNF	28
Cancer, Cellular Movement, Organismal Injury and Abnormalities, Tumor Morphology	Invasion of tumor cells	2.28e-09	Increased	3.613	bias	ADAM9,B4GALT5,CLDN4,CSF1,CSF3,CTSB,CTSL,CTSZ,CTTN,EDN1,ESM1,EZR,FERMT2,GAB1,GAB2,HPSE,IL17A,KLF4,LOXL2,MET,MST1R,PTGS2,PTTG1,RHOB,SDC1,TRPV2	26
Connective Tissue Development and Function, Skeletal and Muscular System Development and Function	Resorption of bone	2.28e-09	Increased	2.936		AGO2,CSF1,CTSK,DCSTAMP,EDN1,FLT3,GAB2,HRH1,IL17A,IL1RN,IL33,IL7,ITGAV,ITGB3,LIF,LPAR1,NOS2,OSM,PTGS2,S1PR1,SCIN,STAT1,TFRC,TNF,TNFAIP3,TOB1	26
Cellular Function and Maintenance	Endocytosis	2.3e-09	Increased	5.499	bias	ABCA1,ADAMTS5,ATP6V0D1,ATP6V1B2,BTBD19,C9orf72,CCL4,CCL5,CCR7,CLIC3,CSF1,CSF2,CSF2RB,CSF3,CTTN,CXCL10,DLL1,EPB41L2,EZR,GAB2,ICAM1,IL33,IL7,ISG15,ITGAV,LAT,LGALS3,LTB4R,MEGF10,MRC1,NEDD4L,NOD2,NPC1,NR3C1,PELI1,PLA2G4A,PPP3CC,PRKX,PTPN1,PTX3,RHOB,RUBCN,SAA1,SCARA5,SNX5,SOAT1,STEAP2,TGM2,TNF,TRPV2,USP2	51
Cellular Development, Cellular Growth and Proliferation, Hematological System Development and Function, Hematopoiesis, Tissue Development	Differentiation of hematopoietic progenitor cells	2.32e-09	Increased	3.353	bias	ADA,ARL11,BLNK,CDK6,CSF1,CSF2,CSF2RB,CSF3,DLL4,EPAS1,FADD,FLT3,Foxp1,HERC6,IL10,IL23A,IL27,IL2RA,IL7,IL9,INHBA,IRF1,JAG1,KLF4,LAT,OSM,PECAM1,PNP,PPP1R15A,PTGS2,PTPN1,RBM47,RUNX2,SCIN,STAT5A,TCAF2,TESC,TFRC,TIMP1,TNF,WDR7	41
Cellular Movement, Hematological System Development and Function, Immune Cell Trafficking, Inflammatory Response	Migration of monocytes	2.37e-09	Increased	3.104	bias	ABCA1,CCL2,CCL20,CCL22,CCL5,CCL8,CSF2,CSF3,F11R,ICAM1,IL10,IL17A,ITGAV,LGALS3,NTN1,PECAM1,TNF,TNFSF18	18
Cell Morphology	Polarization of leukocytes	2.38e-09	Increased	3.63	bias	CCL22,CCL5,CCR7,CSF1,CSF2,CSF3,EBI3,GNAI1,IL10,IL12B,IL12RB2,IL1RN,IL27,IL33,IRF4,SLAMF1,SOCS3,STAT4,TBX21,TIAM1,TNF	21
Cell Death and Survival	Cell death of breast cancer cell lines	2.64e-09		0.561		BHLHE40,BID,BIRC3,CDCP1,CFLAR,CYP3A4,DPH5,DRAM1,DUSP1,DUSP4,FADD,FBXL2,FRMD6,GADD45A,GPX7,HSPB1,IER3,IGFBP3,IRF1,LGALS3,MST1R,NFIL3,NFKBIB,NOS2,OSGIN1,PLK2,PRNP,PTGS2,PTPN13,PTTG1,RGS16,SDC1,SGK1,SMARCA1,STAT1,STAT5A,TFRC,TGM1,TNF,TNFRSF25,UGCG	41
Lymphoid Tissue Structure and Development, Organ Morphology, Tissue Morphology	Quantity of thymus gland	2.69e-09		1.652	bias	AFF1,ATP6AP2,BHLHE40,CCR7,CD83,CDK6,CRLF2,DLL4,DUSP5,EFNB2,FADD,GADD45A,IL12B,IL7,IL7R,IRF1,KLF4,LAT,LIF,NOD2,NOS2,NR3C1,OSM,PIM1,PNP,RHOH,RUNX2,STAM,STAT1,TNF,TOX	31
Nutritional Disease	Weight loss	2.74e-09	Decreased	-3.758	bias	ATF3,ATP8B1,BTD,DGAT2,DUSP1,FADS2,GAL,GDNF,HEXA,HEXB,HRH1,HSD11B1,ID2,IL10,IL17A,IL1RN,IL27RA,IL2RA,IL7R,LIF,MECP2,NFIL3,NOD2,NPC1,NPC2,PPARA,PTGS2,SGK1,SOCS3,STAT5A,TGM2,TIMP1,TNF	33
Cell Morphology, Hematological System Development and Function	Modification of leukocytes	2.77e-09	Increased	2.178	bias	CCL4,CD274,CSF2,IL10,IL12RB2,ITGB8,LIF,RNF128,STAT4,TBX21,THBD,TNFAIP3,TNFRSF18	13
Lipid Metabolism, Molecular Transport, Small Molecule Biochemistry	Concentration of triacylglycerol	2.83e-09		-0.531		ABCA1,BHLHE40,CSF2,CYP27A1,CYP3A4,DGAT2,DUSP1,ELOVL5,FABP5,FADS2,G0S2,GBP5,GPD2,HRH1,HSD11B1,HSD3B7,IFRD1,IL10,INSIG1,LGALS3,LIF,LPGAT1,MECP2,MGLL,MPC1,NEU1,NFIL3,NOS2,OSBPL8,PLAGL2,PLTP,PMP22,PNPLA8,PPARA,PPP1R3C,PTGS2,PTPN1,SCD,TNF	39
Tissue Development	Development of epithelial tissue	2.88e-09	Increased	2.18	bias	CCL2,CCR7,CD9,CSF1,CSF2,CTSB,CXCL10,CXCL2,DLL4,ECE1,EDN1,EFNB2,F11R,GAB1,GDNF,GJB2,HRH1,IL10,IL17A,IL1RN,INHBA,ITGB3,ITGB8,JAG1,KCNJ2,KLF4,LGALS3,LOXL2,MET,NRP2,NTN1,OSM,PECAM1,PIM1,PLA2G4A,PPARA,PRKX,PTGIR,PTGS2,PTPN1,PTPN23,PTTG1,RHOB,RUNX2,SAA1,SDC4,SFN,STAT1,STAT5A,TIMP1,TNF,TNFRSF25,TNFSF15,VEGFB	54
Cell-To-Cell Signaling and Interaction, Inflammatory Response	Response of phagocytes	2.93e-09	Increased	2.495	bias	ABCA1,CCL2,CCL22,CCL5,CD9,CSF2,CSF2RB,CSF3,CXCL10,GAB2,ICAM1,IL10,IL17A,IL33,IL9,ISG15,ITGB3,LGALS3,LTB4R,NOD2,NOS2,NR3C1,NTN1,OSM,PTX3,SAA1,SERPINB9,SOAT1,TGM2,TNF,TRPV2	31
Inflammatory Disease, Organismal Injury and Abnormalities, Respiratory Disease	Fibrosis of lung	2.94e-09		0.166		ADA,AGO2,ARG2,BID,CFLAR,CISH,CRLF2,CSF2,CTSK,FAM111B,FLT3,HSPB1,ICAM1,IL10,IL12B,IL17A,IL1RN,IL23A,IL7,LGALS3,NR3C1,PLA2G4A,PTGIR,PTGS2,RGS16,SEMA7A,SMAD3,STAT1,TNF,TNFSF4	30
Cellular Movement, Immune Cell Trafficking	Cellular infiltration by lymphoid cells	3.01e-09		1.328		CBLB,CCL2,CCL22,CCR7,CD274,CSF2RB,CXCL10,GJB2,IL10,IL17A,IL18BP,IL23A,IL2RA,IL7,IL9,LTA,PTGS2,SAA1,STAT1,STAT5A,TIMP1,TNF,TNFRSF21,TNFSF4,ZC3H12A	25
Cell-mediated Immune Response, Cellular Development, Cellular Function and Maintenance, Cellular Growth and Proliferation, Embryonic Development, Hematological System Development and Function, Hematopoiesis, Lymphoid Tissue Structure and Development, Organ Development, Organismal Development, Tissue Development	Generation of helper T lymphocytes	3.06e-09		0.434	bias	CSF2,IL10,IL12B,IL23A,IL27,IL27RA,NFKBIZ,S1PR1,SOCS3,STAT1,STAT4,STAT5A,TBX21,TNFRSF25,TNFSF15,TNFSF4	16
Cancer, Organismal Injury and Abnormalities	Growth of malignant tumor	3.43e-09	Increased	2.99	bias	ADAM9,BAMBI,CCL2,CD274,CD33,CSF1,CSF2,CSF3,CTSB,DUSP1,EDN1,EZH2,EZR,GDNF,HMGCR,ID2,IDO1,IGFBP3,IL10,IL12B,IL17A,IL1RN,IL27RA,IL7,IL9,INHBA,IRF4,ITGB3,JAG1,LAMTOR5,LGALS3,LIF,LTA,MET,MST1R,NOS2,OSM,PIM1,PTGS2,PTPN13,RHOB,RUNX2,SMAD3,SOCS3,STAT1,STAT5A,TNF,TRIM25	48
Cell-To-Cell Signaling and Interaction, Cellular Growth and Proliferation, Hematological System Development and Function	Suppression of T lymphocytes	3.64e-09		1.578	bias	CBLB,CD274,CSF2,IDO1,IL10,IL17A,IL9,PIM1,RNF128,TBX21,TNF,TNFRSF18,TNFSF15	13
Cell Morphology, Lymphoid Tissue Structure and Development	Morphology of lymphatic system cells	3.65e-09				BACH2,BATF,BLNK,CBLB,CCDC86,CD274,CDK6,CSF3,EBI3,Foxp1,ID2,IL1RN,IL2RA,IL33,IL7,IL7R,IRF1,IRF4,ITPKC,LAT,LGALS3,LTA,MXI1,NFIL3,NFKBIZ,RHOH,SERPINB9,SOCS3,STAT1,TBX21,TNF,TOX	32
Cell-To-Cell Signaling and Interaction, Cell-mediated Immune Response, Cellular Movement, Hematological System Development and Function, Immune Cell Trafficking	Recruitment of T lymphocytes	3.72e-09	Increased	3.163	bias	CCL2,CCL20,CCL22,CCL4,CCL5,CCR7,CSF2,CSF3,CXCL10,FABP5,ICAM1,IL10,LTA,OSM,PELI1,TNF	16
Inflammatory Disease, Respiratory Disease	Asthma	3.77e-09		0.6	bias	ARG2,CCL2,CCL5,CFLAR,CHI3L1,CRLF2,CSF2,CXCL10,DUSP1,EZH2,GSDMB,HMGCR,HRH1,ICAM1,IL10,IL19,IL1RN,IL2RA,IL33,IL9,MGLL,NFKBIB,NOS2,NR3C1,PDE7A,PTGS2,SOCS3,TBX21,TNF,TUBA1C,TUBB1	31
Endocrine System Disorders, Gastrointestinal Disease, Immunological Disease, Metabolic Disease, Organismal Injury and Abnormalities	Insulin-dependent diabetes mellitus	3.82e-09		1.606		ABCA1,BACH2,CBLB,CCL2,CCL22,CCL3L3,CCL4,CCL5,CCR7,CD274,CFB,CISH,COL27A1,CTSB,CXCL10,DDX25,GBP2,GBP6,HERC6,HMGCR,HPSE,HSD11B1,ICAM1,IFIH1,IFIT2,IFIT3,IL12B,IL17A,IL18BP,IL2RA,IRF4,ITIH4,ITPR1,LAT,LTA,MRC1,NOD2,PPARA,PPP3CC,PRUNE2,PTGS2,SCD,STAT1,STAT4,TCF19,TNF,TNFSF4,ZBTB12	48
Organismal Development	Mass of organism	3.92e-09		1.881	bias	ABCA1,ATP8B1,BBS2,CFLAR,CISH,CSF1,CSF2,CYP27B1,DGAT2,DUSP1,G0S2,GAL,GBP5,GPD2,HEXB,IFRD1,IGFBP3,IL10,IL1RN,KLF4,MECP2,NPC1,NR3C1,OSM,PLK2,PNP,PPARA,PTGS2,PTPN1,PTTG1,SAT1,SCD,SMAD3,SOCS3,STAT5A,TBC1D1,THRA,TNF,TNFSF15,TRPM6	40
Cell-To-Cell Signaling and Interaction, Cellular Movement, Hematological System Development and Function, Immune Cell Trafficking	Recruitment of antigen presenting cells	4.05e-09	Increased	2.466	bias	CCL2,CCL20,CCL22,CCL3L3,CCL4,CCL5,CD274,CSF1,CSF2,CXCL10,GAB2,ICAM1,IDO1,IL1RN,IL33,LTB4R,OSM,PECAM1,RHOB,S1PR1,TNF	21
Cell Death and Survival	Cell viability of tumor cell lines	4.05e-09	Increased	4.059	bias	ABCA1,ABCB5,ACKR3,ACSL5,AGO2,ATF3,BHLHE40,BID,CAMK2N1,CARS,CCL2,CD33,CDK6,CFLAR,CLDN4,CNDP2,CSF2,CXCL2,DPH5,DUSP1,DUSP5,EZH2,FADD,FBL,FBXL2,GAB1,GAB2,GRK4,HSPB1,ID2,IER3,IGFBP3,IL10,IL1RN,IL7,INSIG1,JAG1,KLF4,LGALS3,LIF,MAPK12,MET,MICAL2,MRAS,MST1R,NOS2,NR3C1,NTN1,NUPR1,PIM1,PLK2,PPARA,PRNP,PTGS2,PTPN1,PTPN13,PTPN23,RASSF8,RUNX2,SAT1,SCD,SDC1,SFN,SGK1,SMAD3,SOCS3,STAT5A,TBC1D9,TGM2,THBD,TNF,TOX,T…	77
Cancer, Organismal Injury and Abnormalities, Reproductive System Disease	Breast cancer	4.1e-09		-1.793		ABCA1,ADAM9,ADAMTS4,ADAMTS5,ADGRF5,AGO2,AMPD1,ARHGAP35,ATF3,BHLHE40,C3orf20,CCL2,CCL4,CCR7,CD274,CD48,CD9,CDCP1,CDK6,CHI3L1,CLDN4,CNDP2,COL27A1,CSF2RB,CSF3,CTSB,CTSK,CTSZ,CXCL10,CXCL2,CYP3A4,DENND2D,DOT1L,DUSP1,DUSP2,DUSP4,EDN1,EMILIN2,EPAS1,EVPL,EZH2,F11R,FABP5,FADD,FAM111B,FERMT2,FLT3,G0S2,GADD45B,GBP2,GFPT2,GJB2,GLB1L3,GLUL,GPX7,GSDMB,HMGCR,HRH1,HSPB1,HUNK,IER3,IGFBP3,IL12B,IL17A,IL23A,IL27RA,…	132
Cellular Function and Maintenance	Endocytosis by eukaryotic cells	4.1e-09	Increased	4.879	bias	ABCA1,ADAMTS5,ATP6V0D1,ATP6V1B2,BTBD19,CCL4,CCL5,CCR7,CLIC3,CSF2,CSF2RB,CSF3,CXCL10,EPB41L2,GAB2,ICAM1,IL33,IL7,ISG15,LAT,LGALS3,LTB4R,MEGF10,MRC1,NOD2,NR3C1,PELI1,PLA2G4A,PRKX,PTX3,RHOB,SAA1,SOAT1,TGM2,TNF,TRPV2,USP2	37
Organismal Injury and Abnormalities, Respiratory Disease	Damage of lung	4.14e-09		0.192		CCL2,CCL3L3,CCL5,CFB,CSF2,CYP3A4,EDN1,GADD45A,HPSE,ICAM1,IGFBP3,IL10,IL12B,IL17A,IL9,LTA,MGLL,NOS2,NR3C1,PLA2G4A,PTGS2,PTX3,S1PR1,SEMA7A,SGK1,SOCS3,STAT1,TNF,TNFSF4	29
Carbohydrate Metabolism	Quantity of carbohydrate	4.41e-09		0.165		ABCA1,ADA,BID,CFB,CSF1,CSF2,CSF3,DGAT2,EDN1,ELOVL5,EZH2,FABP5,GAL,GBP5,GPD2,GPR68,GUSB,HEXA,HEXB,HSD11B1,ICAM1,IGFBP3,IL17A,INHBA,INSIG1,ITGB3,LGALS3,LGALS8,MRAS,NOCT,NOD2,NOS2,OSM,PDE10A,PLA2G4A,PNPLA8,PPARA,PPP1R15A,PPP1R3C,PRDX6,PTGS2,PTPN1,PTTG1,RGS16,RYR1,SCD,SDC4,SGMS2,SMAD3,STAT4,TBC1D4,THRA,TNF,UGCG,WFS1	55
Cellular Development, Cellular Growth and Proliferation	Proliferation of leukemia cell lines	4.53e-09	Increased	2.389		AFF1,CCL22,CDCP1,CSF1,CSF2,CSF2RB,CSF3,DUSP1,DUSP4,EZH2,FLT3,GAB2,IGFBP3,IL10,IL23A,IL2RA,IL7,INHBA,LGALS3,LIF,MST1R,NR3C1,PIM1,PTGS2,RUNX2,SOCS3,STAT5A,TNF,TOX	29
Cellular Growth and Proliferation, Hematological System Development and Function	Inhibition of blood cells	4.56e-09	Increased	2.683	bias	CBLB,CCL4,CD274,CSF2,EDN1,HPSE,IDO1,IL10,IL17A,IL27,IL9,PIM1,PTGS2,RNF128,TBX21,TNF,TNFRSF18,TNFSF15	18
Cardiovascular System Development and Function, Cellular Movement	Migration of vascular endothelial cells	4.67e-09	Increased	2.044	bias	ACKR3,CD9,DLL4,EDN1,EFNB2,F11R,GAB1,HRH1,IL17A,IL2RA,ITGA9,ITGB3,MET,NEU1,PLA2G4A,PTGS2,PTPN1,S1PR1,SAA1,SDC4,THBD,THRA,TIMP1,TNF,TNFRSF25,TNFSF15	26
Cell-To-Cell Signaling and Interaction	Binding of tumor cell lines	4.67e-09	Increased	4.673	bias	ADAM9,CCL2,CCL4,CD274,CD9,CDCP1,CNTFR,CSF1,CTSB,CTSZ,CXCL10,CXCL2,ESM1,F11R,FERMT2,ICAM1,IGFBP3,IL17A,IL27RA,ITGA9,ITGAV,ITGB3,LAT,LGALS3,LGALS8,LIF,MET,NEU1,OSM,PARVB,PECAM1,PRNP,RHOH,SDC1,SIGMAR1,SMAD3,STAT1,TFRC,TGM2,THBD,TIAM1,TNF,TNFRSF18,TNFRSF25	44
Cell-To-Cell Signaling and Interaction	Interaction of tumor cell lines	4.68e-09	Increased	4.673	bias	ADAM9,CCL2,CCL4,CD274,CD9,CDCP1,CNTFR,CSF1,CTSB,CTSZ,CXCL10,CXCL2,ESM1,EZR,F11R,FERMT2,ICAM1,IGFBP3,IL17A,IL27RA,ITGA9,ITGAV,ITGB3,LAT,LGALS3,LGALS8,LIF,MET,NEU1,OSM,PARVB,PECAM1,PRNP,RHOH,SDC1,SIGMAR1,SMAD3,STAT1,TFRC,TGM2,THBD,TIAM1,TNF,TNFRSF18,TNFRSF25	45
Cellular Movement	Cell movement of carcinoma cell lines	4.83e-09		1.95	bias	CCL2,CCL4,CCL5,CD9,CSF2,CSF3,CTSB,EZR,FBXL2,FERMT2,GAB2,GNAI1,IFIT2,IL17A,ITGAV,KLF4,MET,NOS2,NRP2,PPARA,PTGS2,PTPN1,PTTG1,RASSF8,RHOC,RUNX2,SMAD3,SPINT1,TGM2,TIAM1,TNF	31
Organismal Development, Organismal Injury and Abnormalities	Abnormal morphology of thoracic cavity	4.94e-09				ABCA1,ACKR3,ADA,ADAM9,ADGRF5,AGO2,BID,BIRC3,CCR7,CD9,CDK6,CFLAR,CSF2,CSF2RB,CTSK,DOT1L,DUSP1,ECE1,EDN1,EFNB2,EPAS1,FADD,FADS2,FAM20A,Foxp1,GJA5,GPX7,HSD11B1,IER3,IL1RN,IL7,IL7R,IRF1,ITGAV,ITGB8,JAG1,KMT5C,LAT,LIF,LOXL2,LOXL3,LTA,NEDD4L,NOS2,NPC2,NR3C1,NR6A1,PECAM1,PLA2G15,PLA2G4A,PPARA,RHOH,RUNX2,SPINT1,TGM2,THBD,TNF,TRAF4	58
Lipid Metabolism, Molecular Transport, Small Molecule Biochemistry	Secretion of lipid	5.06e-09	Increased	3.515	bias	ABCA1,ACSL4,ATF3,ATP8B1,BHLHE40,CSF2,CYP27A1,EDN1,FZD4,GAL,HSD11B1,IL17A,INHBA,MAFF,MGLL,NFIL3,NMB,NPC2,PLA2G4A,PLA2G4F,PLTP,PNPLA8,PPARA,PTGS2,SCD,SOAT1,TNF	27
Cellular Development, Cellular Growth and Proliferation, Connective Tissue Development and Function	Proliferation of fibroblast cell lines	5.12e-09		0.487	bias	ACKR3,ATIC,BACH2,BATF,CD9,CDK6,CSF1,CSF2RB,CXCL10,EHF,EZH2,GAB1,GADD45A,GADD45B,GADD45G,GBP2,GDNF,IER3,IGFBP3,IL2RA,IRF1,JAG1,KMT5C,LPAR1,MET,MLLT6,MST1R,MYBL2,NFKBIB,NR3C1,OSM,PIM1,PLAGL2,PPIF,PPP1R15A,PTTG1,RHOB,ROS1,RUNX2,SDC4,STAT1,STEAP2,TFRC,TGIF1,TGM2,TNF,TOB1	47
Cardiovascular System Development and Function, Organismal Development, Visual System Development and Function	Neovascularization of eye	5.13e-09	Increased	2.352	bias	ADAM9,CFB,EPAS1,ICAM1,IGFBP3,IL10,IL17A,INHBA,ITGB3,LGALS3,LIF,NOS2,NR3C1,PLA2G4A,PTGS2,SOCS3,TIMP1,TNF,VEGFB	19
Hematological System Development and Function, Lymphoid Tissue Structure and Development, Tissue Morphology	Quantity of TREG cells	5.34e-09		1.486	bias	BATF,EBI3,FABP5,FLT3,IL12B,IL27RA,IL2RA,IL33,IL7R,ITGB8,NOS2,TNFRSF25,TNFSF15,TNFSF18	14
Cellular Development, Hematological System Development and Function, Lymphoid Tissue Structure and Development	Maturation of leukocytes	5.37e-09	Increased	3.716	bias	BLNK,CCL5,CD83,CSF1,CSF2,CSF3,DLL4,GDNF,ICAM1,IFIH1,IL10,IL12B,IL17A,IL23A,IL2RA,IL33,IL36G,IL7,IL7R,INHBA,IRF1,IRF4,LAT,NFIL3,PRNP,PTGS2,RHOH,STAT1,TBX21,TNF	30
Cell Morphology, Inflammatory Response	Morphology of phagocytes	5.61e-09				ADGRF5,CCL2,CHI3L1,CHST15,CSF1,CSF2,CTSZ,HEXB,HPSE,ICAM1,IL10,IL9,LGALS3,LIF,MARCH1,NOD2,NPC2,PLA2G15,SGMS2,SOAT1,STAT5A,TMPRSS6,TNF	23
Cell Morphology, Immunological Disease, Lymphoid Tissue Structure and Development	Abnormal morphology of lymphocytes	5.69e-09				BACH2,BATF,BLNK,CBLB,CCDC86,CD274,EBI3,ID2,IL1RN,IL2RA,IL7,IL7R,IRF1,IRF4,ITPKC,LAT,LGALS3,LTA,MXI1,NFIL3,NFKBIZ,RHOH,SERPINB9,TBX21,TNF,TOX	26
Hematological System Development and Function, Tissue Development	Accumulation of myeloid cells	5.69e-09		1.583	bias	ACKR3,CCL2,CCL3L3,CCL5,CSF1,CSF2,CSF3,CXCL10,CXCL2,EDN1,IL10,IL12B,IL17A,IL1RN,IL33,IL9,IRF1,IRF4,ITGA9,NOS2,NPC1,OSM,PTX3,THBD,TIMP1,TNF	26
Embryonic Development, Hematological System Development and Function, Lymphoid Tissue Structure and Development, Organ Development, Organismal Development, Tissue Development	Formation of lymphoid tissue	5.73e-09	Increased	2.289	bias	ADA,BHLHE40,CCR7,CD83,CD9,CFLAR,CSF1,CSF2,CSF3,DLL1,DLL4,EDN1,EFNB2,EZH2,FADD,FLT3,ID2,IL10,IL12B,IL17A,IL23A,IL27,IL27RA,IL7,IL7R,IRF1,IRF4,LAT,LTA,NFIL3,NRP2,OSM,PIM1,PPP2R3C,PTPN1,STAT1,THEMIS2,TNF,TNFRSF21,TOX	40
Infectious Diseases	Replication of RNA virus	5.79e-09		0.463	bias	AGO2,ATP6AP2,ATP6V0D1,ATP6V1B2,ATP6V1G1,CACNG4,CCL22,CCL3L3,CCL4,CCL5,CD48,CFLAR,CXCL10,DTX2,EFNB2,EPAS1,EZH2,F11R,GAB1,GPR146,HMGCR,IFIH1,IL10,IL17A,IL27,IRF1,ISG15,ISG20,MOV10,NMI,OPTN,P2RY6,PLK3,PPP1R15A,PRNP,PTPN1,PTX3,RAB9A,RHOH,RSAD2,SGK1,SIGMAR1,SOCS3,STAT1,STAT4,TNF,TNFRSF18,TRIM25,TRPV2,USP2,ZC3H12A	51
Organismal Development	Production of mucus	6.02e-09		1.175	bias	ADA,CCL2,CCR7,CREB3L1,CSF2,DLL4,GAB2,IL17A,IL9,LTA,SMAD3,TNF	12
Cellular Movement, Hematological System Development and Function, Immune Cell Trafficking	Cellular infiltration by inflammatory leukocytes	6.13e-09		-0.687		ADA,CCL2,CSF2,EDN1,IGFBP3,IL10,NOD2,NPC1,OSM,PELI1,STAT1,TBX21,TNF	13
Cell-To-Cell Signaling and Interaction, Cellular Growth and Proliferation, Connective Tissue Development and Function	Stimulation of connective tissue cells	6.13e-09	Increased	3.06	bias	CSF1,CSF2,EDN1,GDNF,IL10,IL17A,IL9,KLF4,LGALS3,LIF,OSM,RUNX2,TNF	13
Cardiovascular System Development and Function, Organ Morphology, Organismal Development	Morphology of heart	6.21e-09				ABCA1,ACKR3,ADA,ADAM9,AGO2,ARG2,ATF3,BIRC3,CDK6,CFLAR,CSF3,CTSB,DOT1L,DUSP1,DUSP5,ECE1,EDN1,EFNB2,EPAS1,FADD,Foxp1,GAL,GJA5,GPX7,HMGCR,HOPX,IER3,IL10,IL1RN,IL33,INHBA,ITGAV,ITGB3,ITGB8,JAG1,KLF15,KLF4,LIF,LOXL2,NEDD4L,NOS2,NR6A1,OSM,P2RY6,PIM1,PLA2G15,PLA2G4A,PPARA,PPP1R3C,PTGIR,PTGS2,SMAD3,SPINT1,TGM2,THBD,THRA,TIAM1,TIMP1,TNF,TNFAIP3,TRPC6,VEGFB	62
Cellular Function and Maintenance, Cellular Growth and Proliferation, Hematological System Development and Function	Production of leukocytes	6.33e-09	Increased	2.341	bias	ADA,CSF1,CSF2,CSF3,CTSL,CXCL10,FLT3,ID2,IL17A,IL9,NFIL3,PTPN1,SOCS3,TBX21,THRA	15
Inflammatory Disease	Multiorgan inflammation	6.44e-09				ACKR3,CCL20,CCR7,CSF1,CXCL10,EBI3,IL10,IL17A,ITGA9,ITGB3,TNFAIP3	11
Cellular Development, Cellular Growth and Proliferation, Connective Tissue Development and Function, Skeletal and Muscular System Development and Function, Tissue Development	Formation of osteoclasts	6.77e-09	Increased	2.328	bias	CCL2,CCL3L3,CSF1,CSF2,DCSTAMP,ICAM1,IL10,IL17A,IL33,IL7,IL7R,INHBA,LAT,LIF,LTA,PLA2G4A,PTGS2,SCIN,SOCS3,STAT1,TNF	21
Cell Morphology	Enlargement of cells	6.92e-09				ADA,ATF3,CCK,CSF3,CTSB,CTTN,DUSP1,DUSP5,ECE1,EDN1,EPAS1,EZR,GAL,GDNF,HSPB1,IER3,IL33,IL7,IL9,INHBA,KLF4,LIF,LPAR1,NOS2,OSM,PARVB,PIM1,PMP22,PNPLA8,PPARA,PRDX6,PTGS2,RUNX2,SGK1,TIAM1,TIMP1,TNF,TNFAIP3,TRPC6,VEGFB	40
Cell Death and Survival	Apoptosis of breast cancer cell lines	6.94e-09		0.811		BHLHE40,BID,BIRC3,CDCP1,CFLAR,CYP3A4,DPH5,DUSP1,DUSP4,FADD,FBXL2,GADD45A,HSPB1,IER3,IGFBP3,IRF1,LGALS3,MST1R,NFKBIB,NOS2,OSGIN1,PLK2,PRNP,PTGS2,PTPN13,PTTG1,SDC1,SGK1,SMARCA1,STAT1,STAT5A,TFRC,TGM1,TNF,TNFRSF25,UGCG	36
Cell Cycle, Gene Expression	Binding of DNA	6.98e-09		1.642		ATF3,CFLAR,CISH,CSF2,CSF3,CYP3A4,EDN1,EPAS1,ETV3,EZH2,FADD,GBP2,ID2,IER3,IGFBP3,IL10,IL12B,IL12RB2,IL17A,IL1RN,IL23A,IL33,IL7,IRF1,ITGB3,JAG1,LIF,MAPK12,NFKBIB,NFKBIZ,NOS2,NR3C1,OSM,PELI1,PLK3,PPARA,PTPN1,PTTG1,RHOB,RUNX2,S1PR1,SCD,SMAD3,SOAT1,SOCS3,STAT1,STAT4,STAT5A,THRA,TNF,TNFAIP3,TRIB3,YBX3	53
Carbohydrate Metabolism	Metabolism of carbohydrate	7.13e-09	Increased	3.694	bias	CBR3,CCK,CCL2,CCL5,CEMIP,CHST15,CMAS,CSF1,CSF2,CTSB,CXCL10,CYP3A4,DGAT2,EDN1,EXT1,FABP5,FBP2,GAL,GFPT2,GNAI1,GUSB,HEXA,HEXB,HPSE,HRH1,ICAM1,IGFBP3,IL10,IL17A,IL1RN,ITGAV,LAT,LTB4R,MECP2,NEU1,NOS2,OPTN,P2RY6,PISD,PLA2G15,PLA2G4D,PPA1,PPARA,PPP1R15A,PPP1R3C,PRDX6,PTPN1,RENBP,S1PR1,SCD,SFN,SMAD3,SOCS3,STAT5A,THBD,TMEM2,TNF,TNFAIP6,TRPV2,USP2	60
Cell Cycle	Interaction of DNA	7.22e-09		1.748	bias	ATF3,CFLAR,CISH,CSF2,CSF3,CYP3A4,EDN1,EPAS1,ETV3,EZH2,FADD,GBP2,ID2,IER3,IGFBP3,IL10,IL12B,IL12RB2,IL17A,IL1RN,IL23A,IL33,IL7,IRF1,ITGB3,JAG1,LIF,MAPK12,NFKBIB,NFKBIZ,NOS2,NR3C1,OSM,PARP3,PELI1,PLK3,PPARA,PTPN1,PTTG1,RHOB,RUNX2,S1PR1,SCD,SMAD3,SOAT1,SOCS3,STAT1,STAT4,STAT5A,THRA,TNF,TNFAIP3,TRIB3,YBX3	54
Hematological Disease, Infectious Diseases, Organismal Injury and Abnormalities	Endotoxin shock response	7.23e-09		1.503	bias	ARID5A,ATF3,BID,BIRC3,ICAM1,IL10,IL1RN,LTA,NFKBIB,NOD2,NOS2,NR3C1,PTGS2,STAT1,TGM2,TNF,TNFAIP3	17
Hematological System Development and Function, Hematopoiesis, Lymphoid Tissue Structure and Development, Organ Morphology, Tissue Morphology	Quantity of thymocytes	7.51e-09		1.577	bias	AFF1,ATP6AP2,BHLHE40,CCR7,CD83,CDK6,CRLF2,DLL4,DUSP5,EFNB2,FADD,GADD45A,IL12B,IL7,IL7R,IRF1,KLF4,LAT,LIF,NOD2,NOS2,NR3C1,OSM,PIM1,PNP,RHOH,RUNX2,STAM,TNF,TOX	30
Cell Death and Survival	Apoptosis of lymphoma cell lines	7.63e-09		0.615		A4GALT,BACH2,BIRC3,BLNK,CD48,CFLAR,CSF2,DUSP1,EZH2,EZR,FADD,FBXL2,HSPB1,IDO1,IGFBP3,ITPR1,LGALS3,MYBL1,SDC4,SMAD3,STAT1,TGM2,TIAM1,TNF,TOX,UGCG	26
Hematological Disease, Immunological Disease, Organismal Injury and Abnormalities	Leukocytosis	7.68e-09		-0.855		ADA,BIRC3,CCL2,CFLAR,CSF1,CSF3,DUSP1,FLT3,IL10,IL17A,IL1RN,IL27RA,IL9,LGALS3,LIF,LTA,NFKBIB,PLA2G4A,SMAD3,SOCS3,TNF	21
Lipid Metabolism, Molecular Transport, Small Molecule Biochemistry	Concentration of eicosanoid	8e-09		1.846	bias	ACSL4,CSF2,DUSP1,EDN1,ELOVL5,FADS2,GNAI1,IL10,IL18BP,IL1RN,IL9,LIF,NOS2,NTN1,PLA2G4A,PNPLA8,PRNP,PTGIR,PTGS2,TNF	20
Cell-To-Cell Signaling and Interaction, Inflammatory Response	Immune response of antigen presenting cells	8.08e-09		1.954	bias	ABCA1,BATF3,CCL22,CSF2,CSF3,GAB2,IL10,IL23A,IL33,IL9,ISG15,LGALS3,LTB4R,MARCH1,NOD2,NOS2,NR3C1,NTN1,PTX3,SAA1,SERPINB9,SOAT1,SOCS3,TGM2,TNF,TNFSF4,TRPV2	27
Cellular Function and Maintenance, Cellular Growth and Proliferation, Hematological System Development and Function	Production of mononuclear leukocytes	8.36e-09	Increased	2.221	bias	ADA,CSF1,CSF2,CSF3,CTSL,CXCL10,FLT3,ID2,IL9,NFIL3,PTPN1,SOCS3,TBX21,THRA	14
Cell-To-Cell Signaling and Interaction, Cellular Growth and Proliferation, Hematological System Development and Function	Suppression of blood cells	8.36e-09		1.837	bias	CBLB,CCL4,CD274,CSF2,IDO1,IL10,IL17A,IL9,PIM1,RNF128,TBX21,TNF,TNFRSF18,TNFSF15	14
Cancer, Organismal Injury and Abnormalities	Metastasis of cells	8.55e-09	Increased	2.865	bias	ABCA1,ADGRF5,ATF3,CCL2,CCL8,CD274,CSF2,CSF3,CTSB,CTTN,CXCL2,EZR,FABP5,HPSE,HUNK,IL7,INHBA,IRF1,ITGAV,LTA,MET,MST1R,NFKBIB,NOS2,NTN1,PTGS2,PTTG1,RHOB,RUNX2,TIMP1,TM4SF1,TNF,TRAF4,UBD	34
Cancer, Organismal Injury and Abnormalities	Neoplasia of tumor cell lines	8.86e-09		1.568	bias	ABCA1,ADGRF5,ATF3,CCL2,CCL8,CD274,CNDP2,CSF3,CTSB,CTTN,CXCL2,DUSP2,EPAS1,EZR,FABP5,FADD,HUNK,IL27,IL27RA,IL7,INHBA,IRF1,KLF4,LTA,MET,MST1R,NFKBIB,NOS2,NTN1,PIM1,PRNP,PTGS2,PTTG1,SFN,STAT1,THBD,THRA,TNF,TRAF4,UBD	40
Cell Morphology, Lymphoid Tissue Structure and Development	Morphology of lymphocytes	8.87e-09				BACH2,BATF,BLNK,CBLB,CCDC86,CD274,EBI3,Foxp1,ID2,IL1RN,IL2RA,IL7,IL7R,IRF1,IRF4,ITPKC,LAT,LGALS3,LTA,MXI1,NFIL3,NFKBIZ,RHOH,SERPINB9,TBX21,TNF,TOX	27
Cardiovascular System Development and Function, Hematological System Development and Function	Blood pressure	9.13e-09		-0.201		ARG2,ATP1A1,CD274,CYP3A4,DLL1,DOT1L,DUSP1,ECE1,EDN1,EPAS1,F11R,GBP5,GDNF,GJA5,GRK4,HSD11B1,ID2,IDO1,IER3,IL10,ITGB3,LTA,NEDD4L,NOS2,NR3C1,PLA2G4A,PPARA,PTGIR,PTGS2,PTPN1,RENBP,SDC4,SGK1,TIMP1,TNF,TRPC6	36
Digestive System Development and Function, Gastrointestinal Disease	Abnormal morphology of digestive system	9.17e-09				ADA,ATF3,BID,CCR7,CDON,CISH,CSF1,CSF2,CTSA,CTSK,CYP27A1,DUSP1,ECE1,EDN1,FADS2,FAM20A,Foxp1,GDNF,HEXA,HEXB,HMOX2,ID2,IGFBP3,IL10,IL12B,IL2RA,IL7,IL7R,IL9,INHBA,JAG1,KLF4,LGALS3,LIF,LTA,MECP2,MET,NFIL3,NOD2,NOS2,NPC1,PLAGL2,PPARA,PTGS2,PTPN1,PTTG1,RUNX2,SMAD3,SOAT1,SOCS3,STAT1,STAT4,TBX21,THRA,TMPRSS6,TNF,TOX	57
Cell-To-Cell Signaling and Interaction, Hematological System Development and Function	Aggregation of blood cells	9.2e-09		1.424	bias	CBLB,CCL22,CCL5,CD9,CSF3,CXCL10,EFNB2,EMILIN2,GJA5,HSPB1,ICAM1,IL17A,IL7,IL9,ITGAV,ITGB3,LAT,LTA,MET,NOS2,P2RY8,PECAM1,PLA2G4A,PTGIR,PTGS2,PTPN1,PTX3,RGS16,SGK1,TIMP1,TNF	31
Cellular Movement, Hematological System Development and Function, Immune Cell Trafficking	Cellular infiltration by lymphocytes	9.27e-09		1.533		CBLB,CCL2,CCL22,CCR7,CD274,CXCL10,GJB2,IL10,IL17A,IL18BP,IL23A,IL2RA,IL7,IL9,LTA,PTGS2,SAA1,STAT1,STAT5A,TIMP1,TNF,TNFRSF21,TNFSF4,ZC3H12A	24
Dermatological Diseases and Conditions, Immunological Disease, Inflammatory Disease, Inflammatory Response, Organismal Injury and Abnormalities	Atopic dermatitis	9.35e-09				ABCA1,CCL20,CCL22,CCL5,CSF2RB,CTSL,DUSP1,DUSP2,FABP5,FADS2,GADD45A,HRH1,IL10,IL17A,IL1RN,IL2RA,MXI1,NFKBIZ,NR3C1,OPTN,OSM,PPARA,PPP3CC,PTGS2,S100A2,STAT1,TGM3,TIMP1,TNF,TNFAIP3,TUBB1,ZNF331	32
Upstream Regulator	Expr Log Ratio	Molecule Type	Predicted Activation State	Activation z-score	Flags	p-value of overlap	Target molecules in dataset	Mechanistic Network
TNF	3.392	cytokine	Activated	8.529	bias	4.81e-59	A4GALT,ABCA1,ABTB2,ACKR3,ADAMTS4,ADAMTS5,ATF3,ATP1A1,BAMBI,BHLHE40,BID,BIRC3,CBR3,CCK,CCL2,CCL20,CCL22,CCL3L3,CCL4,CCL5,CCR7,CD274,CD83,CFB,CFLAR,CHI3L1,CHI3L2,CISH,CLDN4,COL27A1,CRISPLD2,CSF1,CSF2,CSF2RB,CSF3,CTSB,CTSK,CTSZ,CTTN,CXCL10,CXCL2,CYP27A1,CYP27B1,DCSTAMP,DENND2D,DLL4,DUSP1,DUSP2,DUSP4,DUSP5,EBI3,EDN1,EFNB2,EHF,ESM1,EXT1,F11R,FABP5,FADD,FBL,FRMD6,G0S2,GAB1,GADD45A,GADD45B,GADD45G,GBP2,…	313 (14)
lipopolysaccharide		chemical drug	Activated	10.342	bias	3.28e-50	ABCA1,ACKR3,ADA,APOBEC3A,ARG2,ARHGEF3,ATF3,ATP1A1,ATP6V0D1,BAMBI,BATF,BID,BIRC3,CCL2,CCL20,CCL22,CCL3L3,CCL4,CCL5,CCL8,CCR7,CD274,CD33,CD48,CD83,CD9,CDC42EP2,CEMIP,CFB,CFLAR,CHI3L1,CISH,CLIC3,CRLF2,CSF1,CSF2,CSF2RB,CSF3,CTSB,CTSK,CTSL,CXCL10,CXCL2,CYP27A1,CYP27B1,CYP3A4,DLL4,DRAM1,DUSP1,DUSP2,DUSP4,DUSP5,EBI3,EDN1,EFNB2,EHF,ETV3,FABP5,G0S2,GAB1,GADD45A,GADD45B,GBP2,GBP5,GBP6,GEM,GJA5,GJB2,GRASP,H…	309 (14)
Salmonella enterica serotype abortus equi lipopolysaccharide		chemical toxicant	Activated	7.686	bias	4.26e-46	ACKR3,ARL5B,BIRC3,CCL20,CCL3L3,CCL4,CCL5,CCR7,CD274,CFB,CFLAR,CSF2,CSF3,CXCL2,DUSP2,EBI3,EDN1,EZH2,FERMT2,G0S2,GADD45A,GADD45B,GEM,GJB2,GPRC5A,ID2,IDO1,IFIT2,IL10,IL12B,IL23A,IL2RA,IL36G,IL7R,INHBA,IRF1,ISG15,KANK1,KCNJ2,LRRC8C,MAFF,MGLL,NEDD4L,NFKBIZ,NOCT,OSGIN1,PALM2-AKAP2,PTGS2,PTX3,RHOH,RIN2,SLAMF1,SLAMF7,SOCS3,TFPI2,TNF,TNFSF15,TNIP3,TWISTNB,UPB1	290 (20)
IFNG		cytokine	Activated	6.422	bias	7.59e-41	ABCA1,AGRN,ARAP2,ARG2,ATF3,ATP1A1,BID,BIRC3,BLNK,CCL2,CCL20,CCL22,CCL3L3,CCL4,CCL5,CCL8,CD274,CD83,CFB,CFLAR,CHI3L2,CISH,CSF1,CSF2,CSF2RB,CSF3,CTSB,CTSK,CTSZ,CXCL10,CXCL2,CYP27A1,CYP3A4,DLL1,DUSP1,DUSP5,EBI3,ECE1,EDN1,EFNB2,EHF,ESM1,F11R,FABP5,GBP2,GBP5,GBP6,GDNF,GJA5,GJB2,GLUL,GPR146,GUSB,HCAR3,HERC6,HMGCR,HSPB1,ICAM1,IDO1,IER3,IFIH1,IFIT2,IFIT3,IL10,IL12B,IL12RB2,IL17A,IL18BP,IL19,IL1RN,IL23A,I…	290 (17)
IL1B		cytokine	Activated	8.021	bias	2.33e-39	A4GALT,ADAMTS4,ADAMTS5,ATF3,ATP1A1,BAMBI,BIRC3,CCL2,CCL20,CCL22,CCL4,CCL5,CCR7,CD274,CD83,CFB,CFLAR,CHI3L1,CISH,CSF1,CSF2,CSF2RB,CSF3,CTSB,CTSZ,CXCL10,CXCL2,CYP3A4,DLL4,DUSP1,DUSP5,EBI3,EDN1,EHF,EPAS1,FABP5,FAM129A,G0S2,GADD45A,GADD45B,GBP2,GBP6,GEM,GUSB,HEXA,HEXB,HSD11B1,HSPB1,ICAM1,IDO1,IER3,IFIT3,IFRD1,IGFBP3,IL10,IL12B,IL17A,IL19,IL1RN,IL23A,IL27,IL2RA,IL33,IL7,IL9,INHBA,IRF1,IRF4,ISG15,ISG20…	288 (15)
NFkB (complex)		complex	Activated	7.488	bias	7.81e-37	ATF3,ATP6AP2,BAMBI,BATF,BID,BIRC3,CBR3,CCK,CCL2,CCL20,CCL22,CCL3L3,CCL4,CCL5,CCL8,CCR7,CD274,CD83,CFB,CFLAR,CSF1,CSF2,CSF3,CXCL10,CXCL2,CYP3A4,DUSP2,DUSP5,EDN1,EHF,EPAS1,FABP5,G0S2,GADD45A,GADD45B,GBP2,GDNF,GFPT2,HSPB1,ICAM1,IDO1,IER3,IL10,IL12B,IL17A,IL19,IL1RN,IL23A,IL27,IL2RA,IL7R,IRF1,IRF4,ISG15,ITGAV,ITGB8,ITPR1,JAG1,LIF,LTA,MFHAS1,MYBL1,NFKBIZ,NOS2,PECAM1,PLK2,PLK3,PPARA,PPIF,PTGS2,PTX3,RGS…	286 (13)
TREM1		transmembrane receptor	Activated	3.375	bias	9.09e-33	ACKR3,ATF3,CCL20,CCL5,CCR7,CD274,CD83,CFB,CSF1,CSF2,CXCL10,CXCL2,DCSTAMP,DUSP4,EBI3,EDN1,FERMT2,GADD45B,GEM,GPRC5A,HSD3B7,IDO1,IFIT2,IL10,IL12B,IL17A,IL23A,INHBA,IRF1,ISG15,KANK1,KCNJ2,LIF,LRRC8C,MAFF,NEDD4L,NFKBIB,NOD2,NPC1,OSGIN1,PALM2-AKAP2,PTGS2,RGS16,RIN2,SLAMF7,SLCO4A1,TFPI2,THBD,TMEM158,TNF,TNFSF15,TNIP3	288 (18)
TLR4		transmembrane receptor	Activated	6.407	bias	5.39e-32	ARID5A,ATF3,BAMBI,BATF,CCL2,CCL20,CCL3L3,CCL4,CCL5,CCL8,CCR7,CD274,CDK6,CFB,CFLAR,CISH,CSF2,CSF3,CTSK,CXCL10,CXCL2,CYP27B1,DLL4,DUSP2,EBI3,EDN1,GADD45G,GBP2,GDNF,HPSE,ICAM1,IFIT2,IFIT3,IL10,IL12B,IL17A,IL18BP,IL23A,IL27,IL2RA,INHBA,IRF1,ISG15,ISG20,JAG1,LTA,MARCH3,MET,METTL1,NFKBIZ,NMI,NOD2,NOS2,PELI1,PLK2,PTGS2,PTX3,RGS16,RSAD2,SGMS2,SOCS3,STAT1,STAT5A,TFRC,TNF,TNFAIP3,UGCG,ZC3H12A	253 (18)
poly rI:rC-RNA		biologic drug	Activated	7.418	bias	2.54e-29	ABCA1,AGRN,ARID5A,ATF3,BIRC3,CCL2,CCL20,CCL22,CCL3L3,CCL4,CCL5,CCL8,CCR7,CD274,CD33,CD83,CFB,CFLAR,CSF2,CSF3,CXCL10,CXCL2,DLL1,DLL4,DUSP1,DUSP5,EBI3,EDN1,EHF,EZR,GADD45B,GBP2,ICAM1,IDO1,IFIH1,IFIT2,IFIT3,IL10,IL12B,IL17A,IL23A,IL27,IL2RA,IRF1,ISG15,ISG20,KLF4,LIF,LTA,MRAS,NFIL3,NMI,NOS2,PIM1,PPP1R15A,PTGS2,PTPN13,PTPN23,RSAD2,SAT1,SDC4,SLAMF1,STAM,STAT1,TFPI2,TNF,TNFAIP2,TNFAIP3,TNFAIP6,TNFSF4,TR…	240 (15)
TLR3		transmembrane receptor	Activated	6.388	bias	3.41e-27	ABCA1,ADAMTS4,ARG2,ATF3,CCL2,CCL20,CCL3L3,CCL4,CCL5,CD274,CFB,CFLAR,CPM,CSF2,CSF3,CTSK,CXCL10,CXCL2,DUSP1,EDN1,GADD45B,GBP2,GDNF,ICAM1,IER3,IFIH1,IFIT2,IFIT3,IL10,IL12B,IL19,IL1RN,IL23A,IL27,IL33,IRF1,ISG15,ISG20,NFKBIZ,NMI,NOS2,PECAM1,PLK2,PTGS2,PTX3,RHOB,RSAD2,SERPINB9,SOCS3,STAT1,TIMP1,TNF	245 (17)
STAT3		transcription regulator	Activated	3.766	bias	1.77e-26	ARG2,BATF,BOC,CCL2,CCL20,CCL3L3,CCL4,CCL5,CD274,CD83,CD9,CDON,CFB,CFLAR,CHI3L1,CSF2,CSF3,CTSB,CTSL,CTTN,CXCL10,CXCL2,DLL1,EPAS1,FERMT2,GADD45A,GADD45G,GBP2,GBP5,GBP6,HERC6,ICAM1,ID2,IFIH1,IFIT2,IFIT3,IL10,IL12B,IL17A,IL1RN,IL23A,IL2RA,IL7,IL9,IRF1,IRF4,ISG15,ISG20,ITGAV,JAG1,KLF4,LIF,LTA,MRAS,NFKBIZ,NOS2,NRP2,PECAM1,PIM1,PLA2G4A,PTGS2,PTPN13,RSAD2,S1PR1,SAA1,SERPINB9,SGK1,SLAMF1,SOCS3,STAT1,TBX21…	260 (18)
IL10	3.904	cytokine		-0.037		5.12e-26	ARAP2,ARG2,CCL2,CCL20,CCL22,CCL3L3,CCL4,CCL5,CCR7,CD274,CD83,CDK6,CFLAR,CHI3L2,CSF1,CSF2,CSF2RB,CSF3,CTSB,CTSZ,CXCL10,CXCL2,DUSP1,EHF,HCAR3,ICAM1,IDO1,IFIT2,IL10,IL12B,IL12RB2,IL17A,IL1RN,IL23A,IL27,IL33,IL7,IL7R,IL9,IRF1,LIF,MRC1,NOD2,NOS2,OSM,PTGS2,PTPN1,PTX3,RGS16,SHB,SLAMF1,SOCS3,STAT1,STAT4,TFRC,TIMP1,TINAGL1,TMEM158,TNF,TNIP3	269 (17)
IL4		cytokine	Activated	3.408	bias	1.57e-25	ACSL4,ALAS1,APOLD1,ARG2,BHLHE40,CCDC86,CCL2,CCL20,CCL22,CCL3L3,CCL4,CCL5,CCL8,CCR7,CD274,CD33,CD83,CDK6,CFLAR,CISH,CRLF2,CSF1,CSF2,CSF2RB,CSF3,CTSK,CXCL10,CXCL2,DCSTAMP,EPAS1,EXT1,FBL,FNIP2,GADD45G,GBP2,HMGCR,HRH1,HSD11B1,ICAM1,IDO1,IER3,IFIT3,IL10,IL12B,IL12RB2,IL17A,IL19,IL1RN,IL27RA,IL2RA,IL33,IL7R,IL9,IRF1,IRF4,ISG15,ISG20,ITGAV,ITGB3,JAG1,LGALS3,LIF,LRRC8C,LTA,MOV10,MRC1,NABP1,NFIL3,NOCT,NOS…	267 (19)
TLR9		transmembrane receptor	Activated	6.006	bias	3.53e-25	ABCA1,ADAMTS4,ARG2,ATF3,CCL3L3,CCL4,CCL5,CCR7,CD274,CD83,CISH,CPM,CSF1,CSF2,CSF3,CXCL10,DUSP1,EBI3,EDN1,GADD45B,GDNF,IDO1,IER3,IFIT2,IFIT3,IL10,IL12B,IL19,IL23A,IL33,IRF1,IRF4,ISG15,ISG20,LTA,NFKBIZ,NOS2,PTGS2,RSAD2,SDC1,SGMS2,SOCS3,STAT1,TBX21,TIMP1,TNF,UGCG	240 (14)
CD40LG		cytokine	Activated	4.068	bias	4.2e-25	A4GALT,ATF3,BATF,BATF3,BIRC3,CCL2,CCL20,CCL22,CCL4,CCL5,CCR7,CD83,CDK6,CFLAR,CSF1,CXCL10,CXCL2,DUSP1,DUSP2,DUSP4,DUSP5,EBI3,FBL,G0S2,GADD45A,ICAM1,ID2,IDO1,IFIT2,IFIT3,IL10,IL12B,IL27,IL2RA,IL7R,INHBA,IRF1,IRF4,ISG15,LTA,NFKBIB,NOS2,PIM1,PTGS2,PTPN1,RAB9A,SLAMF1,STAT1,STAT4,STAT5A,TFRC,TGIF1,TGM2,TNF,TNFAIP2,TNFAIP3,TNFAIP6,TNFSF4,TRAF4,UBD,YBX3	269 (14)
IL2		cytokine	Activated	5.185	bias	8.14e-25	ABCA1,BHLHE40,BIRC3,CAMK2N1,CCL2,CCL3L3,CCL4,CCL5,CCR7,CD274,CD83,CD9,CDK6,CFLAR,CISH,CSF1,CSF2,CSF2RB,CSF3,CXCL10,CYP27A1,DENND2D,DUSP2,DUSP4,DUSP5,EDN1,EPAS1,GADD45B,GADD45G,ICAM1,IDO1,IER3,IL10,IL12B,IL12RB2,IL17A,IL18BP,IL27RA,IL2RA,IL7R,IL9,IRF1,IRF4,ISG20,LAPTM5,LIF,LTA,LTB4R,NMI,NOS2,OSM,PECAM1,PELI1,PIM1,PNP,PRKX,PTGIR,PTGS2,RGS16,RHOB,RHOC,RNF128,SERPINB9,SLAMF1,SOCS3,STAM,STAT4,TBX21,TI…	240 (15)
TGFB1		growth factor	Activated	5.007	bias	2.11e-24	ABCA1,ADAMTS4,ARHGAP35,BAMBI,BHLHE40,CAMK2N1,CARS,CBR3,CCL2,CCL20,CCL3L3,CCL4,CCL5,CCL8,CCR7,CD83,CEMIP,CFB,CHI3L1,CLDN4,CSF1,CSF2,CTSB,CTSK,CTTN,CXCL10,CXCL2,CYP27B1,DUSP1,DUSP4,ECE1,EDN1,ESM1,EXT1,FABP5,FERMT2,GADD45A,GADD45B,GAL,GBP2,GDNF,GEM,GFPT2,GJB2,GPR146,GPRC5A,GUSB,HEXA,HEXB,HMOX2,HSPB1,ICAM1,ID2,IER3,IFIH1,IFIT3,IFRD1,IGFBP3,IL10,IL12B,IL17A,IL1RN,IL23A,IL2RA,IL33,IL9,INHBA,IRF1,ITGAV,…	342 (20)
NFKB1		transcription regulator	Activated	3.861	bias	3.58e-24	AGO2,ATP6AP2,BAMBI,BHLHE40,BIRC3,CCL2,CCL20,CCL22,CCL3L3,CCL4,CCL5,CFB,CHI3L1,CSF1,CSF2,CTSB,CXCL10,CXCL2,DLL4,DUSP1,EBI3,EHF,ICAM1,IER3,IGFBP3,IL10,IL12B,IL1RN,IL23A,IL2RA,IRF1,IRF4,ISG15,ITPR1,JAG1,LTA,NFKBIB,NMI,NOD2,NOS2,PLK3,PTGS2,PTX3,SDC4,STAT1,TBX21,TNF,TNFAIP3,TNFRSF18,TNFSF15	305 (13)
beta-estradiol		chemical - endogenous mammalian		1.886	bias	5.85e-24	A4GALT,ABCA1,ACKR3,ADAMTS4,ADAMTS5,AGRN,ATF3,BATF,BCAS1,BHLHE40,BID,BIRC3,BLNK,CCL2,CCL20,CCL4,CCL5,CD274,CFB,CHI3L1,CLDN4,CPM,CRIM1,CSF2,CTSB,CTSK,CTSL,CTTN,CXCL10,CXCL2,CYP3A4,DHRS9,DUSP1,DUSP4,EDN1,EFNB2,ENC1,EPAS1,FABP5,FADD,GAB1,GAB2,GADD45A,GADD45B,GADD45G,GAL,GBP2,GDNF,GEM,GJB2,GPD2,GPRC5A,HMGCR,HS1BP3,HSD11B1,HSD17B11,HSPB1,HUNK,ICAM1,ID2,IDO1,IER3,IFRD1,IGFBP3,IL10,IL12B,IL17A,IL7,IL7R,I…	355 (21)
5-O-mycolyl-beta-araf-(1->2)-5-O-mycolyl-alpha-araf-(1->1')-glycerol		chemical - endogenous non-mammalian	Activated	5.091	bias	1.36e-23	ADAMTS5,ATF3,CCL2,CCL20,CCL3L3,CCL4,CCL8,CCR7,CD83,CXCL10,CXCL2,DUSP1,EBI3,ICAM1,IDO1,IER3,IFIT2,IFIT3,ITGB8,MGLL,NFKBIZ,PTGS2,RGS16,SDC4,SLAMF7,SOCS3,STAT4,TNF,TNFAIP3,TNIP3	272 (12)
IL17A	3.822	cytokine	Activated	4.616	bias	3.68e-23	CCL2,CCL20,CCL22,CCL4,CCL5,CD274,CD83,CSF2,CSF3,CTSK,CTTN,CXCL2,GADD45A,GBP2,GUSB,HEXB,ICAM1,IL10,IL17A,IL19,IL1RN,IL23A,IL27,IL33,IL9,ISG15,ITPR1,JAG1,LIF,MRC1,NFKBIZ,NOS2,NTN1,PECAM1,PPARA,PTGS2,RGS16,SOCS3,SPSB1,THBD,TIMP1,TNF,TNFAIP3,TRAF4,ZC3H12A	270 (13)
resiquimod		chemical drug	Activated	4.485	bias	4.29e-23	ATF3,ATP6V1B2,BATF,CCL2,CCL20,CCL22,CCL3L3,CCL4,CCL5,CD83,CSF2,CSF3,CXCL10,CXCL2,DLL4,EBI3,HSPB1,ICAM1,IER3,IL10,IL12B,IL17A,IL19,IL23A,IL27,IL2RA,IL33,INHBA,LIF,LTA,NFKBIZ,NOS2,PRDX6,PTGS2,PTX3,TBX21,TNF,TNFSF15,TNFSF4,ZC3H12A	228 (14)
dexamethasone		chemical drug		-0.536		5.3e-23	ABHD2,ACKR3,ADAM9,ADHFE1,AKAP6,ALAS1,ARG2,ARL5B,ATP1A1,ATP6V1B2,BHLHE40,BIRC3,C9orf72,CARS,CBR3,CCL2,CCL20,CCL3L3,CCL5,CD83,CFB,CFLAR,CHI3L1,CISH,CRISPLD2,CSF1,CSF2,CTSB,CTSK,CTSL,CXCL10,CXCL2,CYP27A1,CYP27B1,CYP3A4,DUSP1,DUSP4,DUSP5,EDN1,EHF,ENC1,EPAS1,EZR,FABP5,FAM129A,G0S2,GAB1,GADD45A,GADD45B,GAL,GBP2,GEM,GLUL,GPR68,GRASP,HMOX2,HSD11B1,HSD17B11,HUNK,ICAM1,ID2,IDO1,IER3,IFIT3,IFRD1,IGFBP3,IL10…	332 (15)
STAT6		transcription regulator		1.168		2.28e-22	APOLD1,CCDC86,CCL2,CCL20,CCL22,CCL3L3,CCL5,CCL8,CCR7,CISH,CTSB,CXCL10,CXCL2,DCSTAMP,EXT1,FNIP2,GADD45B,GADD45G,GBP2,HMGCR,HRH1,IFIT3,IL10,IL12B,IL17A,IL1RN,IL2RA,IL33,IL9,IRF1,IRF4,ISG15,ISG20,JAG1,LIF,LTA,MOV10,NFIL3,PPARA,PPP3CC,PRNP,PTGS2,RNF19B,SAMD4A,SELENBP1,STAT4,TBX21,TIMP1,TNF,USP2	260 (15)
MYD88		other	Activated	6.262	bias	4.14e-22	BAMBI,BATF,CCL2,CCL3L3,CCL4,CCL5,CD274,CD83,CFLAR,CISH,CSF2,CSF3,CTSK,CXCL10,CXCL2,DLL4,DUSP1,EBI3,ICAM1,IFIT2,IL10,IL12B,IL17A,IL1RN,IL23A,IL27,INHBA,IRF1,ISG15,JAG1,LPAR1,MAFF,MET,MRC1,NFKBIZ,NOD2,NOS2,PLA2G4A,PTGS2,RSAD2,SAA1,SOCS3,TBX21,TIMP1,TNF,TNFAIP3,ZC3H12A	212 (14)
IL1		group	Activated	6.195	bias	6.08e-22	ADAMTS4,ADAMTS5,BHLHE40,CBR3,CCL2,CCL20,CCL4,CCL5,CCR7,CFB,CHI3L1,CSF1,CSF2,CSF2RB,CSF3,CTSB,CTSL,CXCL10,CYP27A1,DUSP1,EDN1,GDNF,HMGCR,HSD11B1,ICAM1,IDO1,IL10,IL17A,IL1RN,IL2RA,IL33,IL7,IL9,INHBA,IRF1,IRF4,LIF,NOS2,NRP2,PLA2G4A,PPARA,PTGS2,RUNX2,SAA1,SDC4,SOCS3,TGM2,THBD,TIMP1,TNF,TNFAIP3,TNFAIP6,UGCG	271 (15)
FAS		transmembrane receptor		0.275		2.01e-21	ARAP2,BID,BIRC3,CCL2,CCL20,CCL3L3,CCL4,CCL5,CD48,CD83,CDC42EP2,CFLAR,CSF1,CTSL,CXCL10,CXCL2,DNAH17,FADD,GADD45G,GBP2,HCAR3,ICAM1,IER3,IL10,IRF1,ITGAV,ITGB8,ITPR1,KIF3C,LAT,LGALS3,MET,NOS2,NR3C1,OPTN,OSM,PECAM1,PPP1R15A,PTPN1,PTX3,RND1,RRAGD,RSAD2,RUNX2,SDC1,SERPINB9,TBC1D1,TFRC,TGM3,THBD,TLN2,TNF,TNFAIP3,TNFAIP6,UGCG	265 (12)
IL12 (complex)		complex	Activated	4.275	bias	4.85e-21	CCL2,CCL20,CCL22,CCL4,CCL5,CCR7,CISH,CSF1,CSF2,CXCL10,EBI3,GADD45B,GADD45G,ICAM1,IDO1,IFIH1,IFIT2,IL10,IL12B,IL12RB2,IL17A,IL18BP,IL27,IL2RA,IL7R,IRF1,IRF4,ISG15,ISG20,LTA,NOS2,PIM1,PTGS2,SMAD3,SOCS3,STAT4,TBX21,TFRC,TIMP1,TNF,TNFRSF25	244 (17)
NFKBIA		transcription regulator	Activated	3.802	bias	6.04e-21	ACKR3,ADAMTS5,BID,BIRC3,CCL2,CCL20,CCL3L3,CCL5,CFLAR,CHI3L1,CHI3L2,CSF1,CSF2,CSF3,CTSB,CTSZ,CXCL10,CXCL2,ESM1,GADD45A,GADD45B,GADD45G,GBP2,HPSE,ICAM1,IER3,IL10,IL1RN,IL2RA,IL33,IL7R,IRF1,ISG15,ITGAV,ITPR1,LIF,MSC,NFKBIB,NOCT,NOD2,NOS2,NR6A1,PIM1,PTGS2,PTPN13,PTX3,RGS16,RNF19A,SAT1,SDC1,SDC4,SGK1,SOAT1,SOCS3,TFRC,TIMP1,TNF,TNFAIP2,TNFAIP3	269 (14)
Immunoglobulin		complex		1.94		6.07e-21	CCL2,CCL4,CCL5,CCL8,CD274,CD83,CDK6,CISH,CRISPLD2,CSF1,CSF2,CSF2RB,CTSZ,CXCL10,CXCL2,DUSP1,EXT1,ICAM1,IDO1,IL10,IL12B,IL17A,IL2RA,IL33,INHBA,IRF1,KCTD12,KLF4,LTA,MAFF,MICAL2,NFIL3,NOS2,PTGS2,RNF128,RSAD2,SAT1,TBX21,TFRC,TIMP1,TNF,TNFSF15,UBD,YBX3	249 (15)
LDL		complex		0.989	bias	8.52e-21	ABCA1,ARG2,ATF3,CCL2,CCL20,CCL4,CCL5,CCL8,CCR7,CFLAR,CSF2,CTSK,CXCL10,CXCL2,DLL4,DUSP1,DUSP2,ECE1,G0S2,GJA5,GNAI1,HMGCR,ICAM1,IDO1,IFIT2,IGFBP3,IL12B,IL1RN,INSIG1,ITGAV,ITGB3,ITPR1,LTA,MSC,NOS2,NPC1,NPC2,PECAM1,PTGS2,SMAD3,SOCS3,TNF,TNFAIP3,TNFAIP6	255 (16)
NR3C1	1.511	ligand-dependent nuclear receptor		-1.397		1.19e-20	ABCA1,ABHD2,ARHGEF3,BHLHE40,BIRC3,CCL2,CCL3L3,CCL4,CCL5,CD83,CSF2,CXCL10,CXCL2,CYP27A1,CYP3A4,DGAT2,DPP7,DUSP1,EDN1,ENC1,FADD,GAB1,GADD45A,GADD45B,GBP2,GEM,GLUL,HSD11B1,ICAM1,IER3,IFIH1,IFIT2,IL10,IL12B,IL36G,IL7R,INHBA,IRF1,ISG15,ITGAV,LGALS8,LIF,NFIL3,NFKBIB,NOD2,NOS2,NR3C1,PLA2G4A,PLK2,PPARA,PPP1R15A,PPP3CC,PTGS2,RHOB,RRAGC,RUNX2,SDS,SERPINB9,SGK1,SLC38A1,STAT5A,TCF19,THBD,TLE3,TNF,TNFAIP2,TNF…	345 (16)
E. coli B5 lipopolysaccharide		chemical - endogenous non-mammalian	Activated	5.646	bias	1.69e-20	ACKR3,BHLHE40,BIRC3,CCL2,CCL20,CCL22,CCL3L3,CCL4,CCL5,CCR7,CD274,CD83,CDK6,CSF2,CSF3,CXCL10,CXCL2,DUSP1,GBP2,HSD11B1,ICAM1,IDO1,IL10,IL12B,IL12RB2,IL17A,IL2RA,IL7,IL7R,IL9,IRF1,ISG20,LIF,NEDD4L,NOD2,NOS2,PTGS2,RHOB,SDC1,SELENBP1,SOCS3,TGIF1,TGM2,TNF,TNFAIP3	210 (14)
RELA		transcription regulator	Activated	5.446	bias	1.98e-20	ADAMTS5,ATP6AP2,BACH2,BHLHE40,BIRC3,CCL2,CCL20,CCL22,CCL5,CCR7,CD274,CFB,CHI3L1,CSF2,CTSB,CXCL10,CXCL2,CYP3A4,DUSP1,EDN1,EHF,EPAS1,ICAM1,IER3,IL10,IL12B,IL1RN,IL23A,IL27,IL2RA,IL7R,IL9,IRF1,IRF4,ISG15,LTA,MST1R,NFKBIB,NMI,NOD2,NOS2,PECAM1,PLK3,PRDX6,PTGS2,PTX3,SAA1,SDC4,STAT5A,TBX21,TFPI2,TGM2,TNF,TNFAIP2,TNFAIP3,TRPC6,UBD	283 (14)
IgG		complex	Inhibited	-2.201	bias	6.54e-20	ATP6V0D1,CCL2,CCL4,CCL5,CD9,CLDN4,CSF1,CSF2,CYP27A1,DUSP1,EDN1,EZR,FABP5,GPRC5A,HSPB1,IL10,IL12B,IL12RB2,IL17A,IL1RN,IL2RA,ISG15,ITGB8,LGALS3,PIM1,PPIF,PPP1R15A,PTGS2,S1PR1,SLAMF7,SPINT1,TNF,TNFAIP3,TNFSF15,TOB1,UGCG	215 (17)
PTGER4		g-protein coupled receptor	Inhibited	-2.705		6.6e-20	ADAMTS4,CCL2,CCL20,CCL3L3,CCL4,CCR7,CDK6,CXCL10,EDN1,GAB1,GBP2,GBP6,GDNF,HERC6,IFIH1,IFIT2,IL10,IL12B,IL23A,IL27,IRF1,ISG20,MAFF,MXI1,NOS2,OSM,PTGS2,RSAD2,RUNX2,S1PR1,SLAMF1,SLAMF8,TBC1D4,TNF	248 (19)
camptothecin		chemical drug	Activated	3.901	bias	1.6e-19	ARAP2,ATF3,BAMBI,BFAR,BID,BIRC3,CCL2,CCL20,CD48,CD83,CDC42EP2,CDK6,CFLAR,CSF1,CSF2,CTSL,CXCL2,DNAH17,EDN1,ENC1,FADD,GADD45A,GADD45B,GADD45G,GBP2,HCAR3,ICAM1,IGFBP3,IL2RA,INSIG1,IRF1,ITPR1,KIF3C,LAT,LGALS3,MAFF,NOS2,NR3C1,OLFM4,OPTN,OSM,PECAM1,PPIF,PTGS2,PTPN1,PTX3,RRAGD,RSAD2,SAA1,SAT1,SDC1,SDC4,SERPINB9,SFN,TBC1D1,TFRC,TGM3,THBD,TLN2,TMEM158,TNF,TNFAIP3,TNFAIP6,TNS3,TOB1,TRAF4,UGCG,ZHX2	285 (18)
IFNAR1		transmembrane receptor		1.061	bias	2.51e-19	ATF3,CCL20,CCL3L3,CCL4,CCL5,CSF1,CXCL10,CXCL2,DLL1,HMGCR,IDO1,IFIH1,IFIT2,IFIT3,IL10,IL12B,IL17A,IL27,ISG15,ITGAV,LIF,NOS2,PTGS2,RSAD2,SDC1,SOCS3,STAT1,TGM2,TNF,TNFAIP2,TNFAIP3,UBD,VEGFB	240 (16)
IL6		cytokine	Activated	5.554	bias	3.17e-19	ABCA1,ADAMTS4,ADAMTS5,ALAS1,ATF3,BATF,CCK,CCL2,CCL20,CCL3L3,CCL4,CCL5,CCR7,CD48,CD83,CFLAR,CISH,CSF1,CSF2,CSF2RB,CTSK,CXCL10,CXCL2,CYP3A4,DUSP1,EZH2,GADD45A,GADD45B,GADD45G,GAL,GBP2,ICAM1,ID2,IDO1,IFIT2,IGFBP3,IL10,IL12B,IL17A,IL1RN,IL23A,IL7,IL7R,IL9,IRF1,IRF4,ITGAV,ITGB3,ITPR1,LIF,MET,MRAS,MYBL2,NOS2,NR3C1,PECAM1,PIM1,PPP1R15A,PRNP,PTGS2,PTTG1,RUNX2,SAA1,SGK1,SLC39A14,SOCS3,STAT1,STAT4,TBC1D9,T…	278 (17)
IL18		cytokine	Activated	4.928	bias	3.75e-19	ADAMTS5,ATF3,CCL2,CCL20,CCL3L3,CCL4,CCL5,CCR7,CD83,CFLAR,CSF1,CSF2,CXCL10,GADD45B,GADD45G,GIMAP4,ICAM1,IDO1,IL10,IL12RB2,IL17A,IL18BP,IL2RA,IL9,IRF1,LIF,NFIL3,NFKBIZ,NOS2,PTGS2,SMAD3,TBX21,TIMP1,TNF,TNFRSF25	277 (18)
SAMSN1		other	Activated	5.196	bias	4.13e-19	ARID5A,BATF,CCL3L3,CCL4,CXCL10,CXCL2,EDN1,IFIT2,IFIT3,IL12B,IL23A,INHBA,IRF1,ISG15,ISG20,LTA,NFKBIZ,NMI,PELI1,PTGS2,RSAD2,SDC1,SOCS3,STAT1,STAT5A,TNF,ZC3H12A	233 (17)
phorbol myristate acetate		chemical drug	Activated	7.387	bias	4.93e-19	ABCA1,ACSL4,ADAM9,ADAMTS4,ALAS1,APOBEC3A,BIRC3,CCL2,CCL20,CCL3L3,CCL4,CCL5,CCR7,CEMIP,CFLAR,CSF1,CSF2,CSF3,CTSB,CTTN,CXCL10,CXCL2,CYP27B1,DENND3,DUSP1,DUSP2,DUSP5,EBI3,ECE1,EFNB2,GAL,GEM,GPRC5A,HPSE,HRH1,HSD11B1,ICAM1,ID2,IGFBP3,IL10,IL12B,IL12RB2,IL17A,IL1RN,IL23A,IL2RA,IL7R,INHBA,IRF1,IRF4,ISG15,ITGB3,KLF4,LAT,LBH,LIF,LOXL2,LTA,MECP2,MRC1,MST1R,NEU1,NFIL3,NFKBIB,NOCT,NOS2,OSM,PECAM1,PIM1,PLA2G1…	283 (14)
IL1A		cytokine	Activated	5.742	bias	7.41e-19	ADAMTS4,ADAMTS5,BIRC3,CCL2,CCL20,CCL4,CCL5,CCL8,CD274,CD83,CSF1,CSF2,CTSK,CXCL10,CXCL2,CYP3A4,HSD11B1,ICAM1,IL10,IL12B,IL17A,IL1RN,IL2RA,IL36G,IL9,INHBA,ITGAV,ITGB3,LIF,NFKBIZ,NOS2,NR3C1,P2RY6,PLA2G4A,PTGS2,PTX3,SAA1,TNF,TNFAIP3,ZC3H12A	275 (15)
TICAM1		other	Activated	4.867	bias	1.89e-18	CCL2,CCL3L3,CCL4,CCL5,CFB,CFLAR,CXCL10,CXCL2,DUSP1,ICAM1,IFIT2,IFIT3,IL10,IL12B,IL17A,IL18BP,IL23A,IRF1,ISG15,ISG20,JAG1,LPAR1,MAFF,MET,NFKBIZ,PELI1,PTGS2,RHOB,RSAD2,SOCS3,TNF,TNFAIP3	207 (18)
SB203580		chemical - kinase inhibitor	Inhibited	-6.698	bias	2.43e-18	ADAMTS4,ATF3,CCK,CCL2,CCL20,CCL4,CCL5,CCL8,CD83,CSF2,CTSK,CXCL10,DUSP1,EHF,GADD45A,GBP2,HCAR3,ICAM1,IDO1,IER3,IFIT2,IFIT3,IGFBP3,IL10,IL12B,IL1RN,IL23A,IL2RA,IL36G,ISG15,ISG20,MAPK12,NOS2,OPTN,PPARA,PPP1R15A,PTGS2,RUNX2,SERPINB9,SGK1,SMAD3,SOCS3,STAT1,TGM1,TGM2,TIMP1,TNF,TNFAIP6,TRPC6,UBD	296 (17)
CSF2	3.942	cytokine	Activated	6.542	bias	4.84e-18	ABCA1,ADA,BID,BIRC3,CCL2,CCL3L3,CCL4,CCR7,CD33,CD83,CISH,CSF1,CSF2,CSF2RB,CSF3,CXCL10,CXCL2,EDN1,HCAR3,ICAM1,ID2,IDO1,IER3,IL10,IL12B,IL19,IL1RN,IL23A,IL2RA,INHBA,IRF4,ITGB3,MET,MRC1,NOS2,OSM,PDE1B,PIM1,PLA2G15,PLAGL2,PMP22,PPIF,PPP1R15A,PRNP,PTGS2,RHOH,SERPINB9,SGK1,SLAMF7,SOCS3,TGM2,TNF,TNFAIP3,TNFRSF18,TNFSF15,UBD	301 (20)
NFATC2		transcription regulator	Activated	3.072	bias	8.63e-18	ABCA1,BATF,CCL3L3,CFLAR,CISH,CSF2,CXCL10,EDN1,IFIT2,IFIT3,IL10,IL12RB2,IL17A,IL2RA,IL9,INHBA,IRF1,IRF4,ISG15,ISG20,ITPR1,NFKBIZ,NMI,PELI1,PLK2,PTGS2,PTPN1,RSAD2,SOCS3,STAT1,STAT5A,TNF	280 (18)
IKBKB		kinase	Activated	4.8	bias	9.72e-18	ABCA1,ATF3,BIRC3,CBLB,CCL2,CCL20,CCL3L3,CCL4,CCL5,CCR7,CFLAR,CSF1,CSF2,CTSB,CTSK,CTSZ,CXCL10,CXCL2,EDN1,EZH2,GADD45A,GBP2,ICAM1,IL10,IL12B,IL17A,IL1RN,IRF1,ISG15,ITGB3,NFKBIB,NOCT,NOS2,NR6A1,PLA2G4A,PTGS2,PTPN13,PTX3,RGS16,SGK1,SOCS3,TNF,TNFAIP2	234 (16)
Cg		complex	Activated	4.893	bias	9.92e-18	BHLHE40,CCDC86,CCL2,CXCL10,DDX25,DUSP1,EFNB2,EPAS1,ESM1,FABP5,FZD4,G0S2,GAL,GBP6,GJB2,HMGCR,HPSE,HSD11B1,ICAM1,IER3,IFIT3,IGFBP3,IL10,IL33,INHBA,ITGAV,ITGB3,KCNQ5,KLF4,LIF,MARCH3,MEGF10,NFKBIB,NOS2,PECAM1,PPARA,PTGS2,PTX3,RUNX2,SDC1,SDC4,SMARCA1,STEAP1,TFPI2,TIMP1,TM4SF1,TMEM158,TNF,TNFAIP6	341 (23)
forskolin		chemical toxicant	Activated	5.25	bias	1.12e-17	ABCA1,ATF3,ATP6AP2,ATP6V0D1,ATP6V1B2,ATP6V1G1,BHLHE40,CCK,CCL2,CCL5,CD9,CRISPLD2,CSF1,CTTN,CXCL2,CYP27B1,DUSP1,EBI3,EDN1,ESM1,EZR,GAB2,GADD45A,GADD45B,GADD45G,GAL,GEM,HSD11B1,ICAM1,ID2,IER3,IGFBP3,IL10,IL17A,IL23A,IL2RA,INHBA,ITPR1,KLF4,MET,NFIL3,NOS2,NPC1,NPC2,PPP1R3C,PRKX,PTGS2,PTPN1,RAB20,RASGEF1B,RHOB,RUNX2,SAT1,SGK1,SH3BP4,SMAD3,SMARCA1,STAT1,TFPI2,TIMP1,TLE3,TM4SF1,TMBIM1,TNF,TNFAIP3,TNFAIP…	279 (19)
E. coli B4 lipopolysaccharide		chemical toxicant	Activated	4.823	bias	1.28e-17	ADAMTS5,BID,CCL2,CCL20,CCL3L3,CCL4,CCL5,CD274,CD83,CSF2,CSF3,CXCL10,CXCL2,CYP27A1,FADD,FLT3,GADD45G,GBP2,GNAI1,ICAM1,IFIT3,IL10,IL12B,IL17A,IL1RN,IL23A,IL27,IL33,IL9,METTL1,MRC1,NOS2,PIM1,PLA2G4A,PPARA,PTGS2,RAB20,RHOC,RSAD2,SOCS3,TNF,TNFAIP3,TNFSF4	242 (16)
TCR		complex	Activated	4.05	bias	1.58e-17	BATF,BIRC3,CBLB,CCL22,CCL3L3,CCL4,CCL5,CCR7,CFLAR,CISH,CSF2,CTSB,CXCL10,FBL,GADD45B,GADD45G,IFIH1,IFIT2,IFIT3,IL10,IL12RB2,IL17A,IL2RA,IL7,IL7R,IL9,IRF1,IRF4,ISG15,ISG20,LAT,LTA,NR3C1,PIM1,PRDX6,RNF128,RSAD2,SLAMF1,SOCS3,STAT1,STAT4,STAT5A,TBX21,TLE3,TNF,TNFAIP3,TNFRSF18,TNIP3,TOB1	217 (18)
IFNLR1		transmembrane receptor				2.21e-17	ATF3,CCL20,CCL3L3,CCL4,CCL5,CSF1,CXCL10,CXCL2,IFIH1,IFIT2,IFIT3,ISG15,ITGAV,LIF,PTGS2,RSAD2,TNF,TNFAIP2,TNFAIP3	192 (15)
STAT1	1.813	transcription regulator	Activated	4.821	bias	4.53e-17	ABCA1,CCL2,CCL20,CCL3L3,CCL4,CCL5,CCR7,CD274,CFB,CSF2,CXCL10,CXCL2,DCSTAMP,EDN1,GBP2,GBP5,GBP6,HERC6,ICAM1,IDO1,IFIH1,IFIT2,IFIT3,IL10,IL12B,IL12RB2,IL17A,IL18BP,IRF1,ISG15,KCTD12,KLF4,MS4A3,NOS2,PECAM1,PHACTR1,PIM1,PTGS2,RSAD2,SLAMF8,SMAD3,SOAT1,SOCS3,STAT1,TBX21,TNF,UBD	255 (17)
PDGF BB		complex	Activated	5.93	bias	8.98e-17	ACKR3,ARG2,ATF3,BHLHE40,CCL2,CCL20,CCL8,CSF1,CSF2,CXCL2,DUSP1,DUSP5,EDN1,GADD45A,GBP2,GDA,GDNF,GEM,GFPT2,GJA5,GLUL,HMGCR,HSD3B7,IER3,INHBA,LGALS3,LIF,MYBL2,NFIL3,NOS2,PIM1,PLK2,PPP1R15A,PTGS2,RHOB,SAT1,SCD,SGK1,SOCS3,TGM2,THBD,TIMP1,TNFAIP3,TOB1,TRIB3	284 (20)
CD40		transmembrane receptor	Activated	2.785	bias	1.02e-16	A4GALT,BIRC3,CCL2,CCL22,CCL4,CCL5,CD83,CDK6,CFLAR,CSF1,CSF3,CXCL10,DUSP1,ICAM1,IL10,IL12B,IL1RN,IL27,IL2RA,IRF1,IRF4,KLF4,LGALS3,LTA,MET,NOS2,PIM1,PTGS2,SLAMF1,SLAMF7,TBX21,THBD,TNF,TNFAIP3,TNFRSF25,TNFSF4,TRAF4	228 (15)
salmonella minnesota R595 lipopolysaccharides		chemical - endogenous non-mammalian	Activated	5.088	bias	1.24e-16	ADAM9,CCL2,CCL20,CCL22,CCL3L3,CCL4,CCL5,CCL8,CD83,CFLAR,CXCL10,CXCL2,ICAM1,IFIT2,IL10,IL12B,IRF1,ISG15,JAG1,LPAR1,MAFF,MET,NFKBIZ,PTGS2,RSAD2,SOCS3,TNF,TNFAIP3	213 (17)
ERK		group	Activated	4.226	bias	2.74e-16	ABCA1,ACSL5,ARG2,CCK,CCL2,CCL4,CFLAR,CLDN4,CSF2,CTSK,CTTN,CXCL10,CXCL2,DUSP1,EDN1,EPAS1,EZH2,ICAM1,IER3,IL10,IL12B,IL17A,IL23A,ITGB3,JAG1,LIF,MAFF,NFKBIZ,PECAM1,PTGS2,RUNX2,SFN,STAT1,TBX21,TGM2,TIMP1,TNF,UGCG	289 (18)
Interferon alpha		group	Activated	5.305	bias	2.99e-16	A4GALT,APOBEC3A,ATF3,CCL2,CCL22,CCL5,CCR7,CD83,CISH,CSF2,CSF2RB,CXCL10,CXCL2,CYP3A4,GBP2,GIMAP4,HERC6,ICAM1,IDO1,IFIH1,IFIT2,IFIT3,IL10,IL12B,IL12RB2,IL1RN,IL27,IL2RA,IL7,IL9,IRF1,IRF4,ISG15,ISG20,ITPR1,LIF,MYLIP,NABP1,NFIL3,NMI,NOS2,PIM1,PTGS2,RSAD2,SAT1,SERPINB9,SOCS3,STAT1,STAT4,TBX21,TGM1,TNF	248 (16)
PD98059		chemical - kinase inhibitor	Inhibited	-5.967	bias	4.01e-16	ABCA1,ATF3,CCK,CCL2,CCL20,CCL3L3,CCL4,CCL5,CD83,CFLAR,CSF2,CTSB,CTSK,CTSL,CXCL10,CXCL2,DUSP1,DUSP4,DUSP5,ECE1,EDN1,EPAS1,GADD45A,GDNF,ICAM1,IER3,IGFBP3,IL10,IL12B,IL17A,IL1RN,IL2RA,ITGAV,ITGB3,LAT,LPGAT1,MCF2L,MET,MGLL,MYBL2,NOS2,NPC1,PIM1,PLA2G4A,PNP,PPP1R15A,PTGS2,RAB20,RUNX2,SDC1,SELENBP1,SIGMAR1,SMAD3,SOAT1,SOCS3,STAT5A,TIMP1,TNF,TRPC6	218 (17)
BCL6		transcription regulator	Inhibited	-2.76	bias	4.99e-16	BACH2,BLNK,CCL2,CCL3L3,CCL4,CCR7,CSF1,CTSK,CXCL10,DCSTAMP,EBI3,EPB41L2,GADD45A,HERC6,IL10,IL17A,IL23A,IL2RA,IL7R,IL9,IRF4,LBH,MRC1,NOS2,PDP2,PLA2G4A,PRSS23,SDC1,SH2D4A,SLC39A8,SOCS3,TBX21,TNF,TNFRSF18,TRIM2	229 (19)
IFNB1		cytokine	Activated	3.458	bias	5.32e-16	BHLHE40,CCL2,CCL4,CCL5,CD274,CD83,CTSK,CXCL10,CXCL2,DLL1,EBI3,GBP2,GBP5,GBP6,HMGCR,IDO1,IFIH1,IFIT2,IFIT3,IL10,IL12B,IL17A,IL27,IRF1,ISG15,ISG20,ITGAV,ITGB3,NMI,NOCT,NOD2,NOS2,NUB1,PTGS2,RSAD2,SLC39A14,STAT1,STAT4,TIMP1,TNF,TNFSF4	240 (16)
TNFSF11		cytokine	Activated	5.116	bias	5.64e-16	CCL2,CCL3L3,CCL4,CCL5,CD83,CSF3,CTSK,DCSTAMP,DUSP1,GADD45B,GPR68,GTF2H1,ICAM1,IER3,IFRD1,IL10,IL12B,IL1RN,IL9,IRF4,ITGAV,ITGB3,LAT,NFIL3,NFKBIB,NFKBIZ,NOS2,PIM1,PTGS2,PTPN23,RGS16,RHOB,SDC1,SDC4,SERPINB9,SIGMAR1,SOCS3,STAT1,TNF	275 (18)
IL27	5.125	cytokine	Activated	2.548	bias	7.37e-16	CCL2,CCL20,CCL4,CCL5,CFLAR,CSF2,CXCL10,GADD45G,GBP2,ICAM1,IL10,IL12B,IL12RB2,IL17A,IL18BP,IL1RN,IL2RA,IL9,IRF1,MRC1,NOS2,PIM1,PTGS2,SOCS3,STAT1,TBX21,TNF,UBD	242 (17)
P38 MAPK		group	Activated	5.482	bias	2.49e-15	ABCA1,ARG2,ATF3,CCK,CCL2,CCL3L3,CCL5,CCL8,CCR7,CD83,CFLAR,CSF2,CSF3,CTSK,CXCL10,CXCL2,DUSP1,EDN1,FADD,ICAM1,IER3,IL10,IL12B,IL17A,IL1RN,IL23A,IL2RA,INHBA,ITGAV,ITGB3,ITGB8,KLF15,KLF4,NOS2,PLA2G4A,PTGS2,RHOB,RUNX2,RYR1,SGK1,SMAD3,SOCS3,STAT1,TBX21,TIMP1,TNF	203 (17)
U0126		chemical - kinase inhibitor	Inhibited	-5.78	bias	3.11e-15	ACKR3,ADAMTS4,APOBEC3A,ARG2,ATF3,ATP6AP2,BHLHE40,BIRC3,CCL2,CCL3L3,CCL4,CCL5,CD274,CFLAR,CLDN4,CSF2,CSF3,CXCL10,CXCL2,DUSP1,DUSP4,DUSP5,EDN1,EHF,ENPP4,ETV3,G0S2,GADD45B,GDNF,GFPT2,ICAM1,IER3,IL10,IL12B,IL23A,INHBA,IRF1,ITPKC,LIF,MET,NOS2,PECAM1,PLA2G4A,PLK2,PTGS2,RUNX2,SGK1,SHB,SMAD3,SOCS3,TFPI2,TGM2,TMEM158,TNF	282 (18)
Tlr		group	Activated	4.762	bias	3.52e-15	CCL2,CCL4,CCL5,CCR7,CD83,CISH,CSF2,CXCL10,DUSP1,ICAM1,ID2,IDO1,IL10,IL12B,IL33,IRF1,IRF4,JAG1,NOS2,PTGS2,RGS16,SOCS3,STAT1,TNF,TNFAIP3,ZC3H12A	234 (17)
JUN		transcription regulator	Activated	3.249	bias	4.74e-15	ALAS1,ATF3,BIRC3,CCL2,CCL8,CD164,CD274,CFLAR,CSF1,CSF2,CTSL,CXCL10,DUSP1,DUSP5,EDN1,EZR,GDNF,ICAM1,ID2,IGFBP3,IL10,IL12B,IL23A,IL2RA,IL7R,ITGAV,ITGB8,LGALS3,LIF,LPAR1,MCF2L,MET,MXI1,NFKBIZ,NOS2,OSM,PLA2G4A,PTGS2,PTX3,RHOB,RUNX2,SAA1,SCD,SDC1,SERPINB9,SGK1,SOCS3,STAT1,TIMP1,TNF,TNFSF15	313 (24)
tretinoin		chemical - endogenous mammalian	Activated	4.789	bias	4.89e-15	ABCA1,ABHD2,ADA,ADAMTS5,ADGRE3,ALAS1,ATP6V1B2,BAMBI,BHLHE40,BID,BIRC3,CCK,CCL2,CCL20,CCL22,CCL4,CD9,CDK6,CSF2,CSF3,CTSB,CTSK,CTSL,CXCL10,CXCL2,DCSTAMP,DHRS9,DLL1,DLL4,DUSP1,DUSP4,EBI3,ECE1,EDN1,FABP5,G0S2,GPRC5A,GRASP,HS3ST1,HSD11B1,HSD17B11,HSPB1,ICAM1,ID2,IER3,IFIH1,IFIT2,IFIT3,IGFBP3,IL10,IL12B,IL12RB2,IL17A,IL9,INHBA,IRF1,IRF4,ISG15,ITGB3,KCNJ2,KCNQ5,KIF3C,KLF15,LOXL2,LRRC25,LTB4R,MEIS2,MRAS,…	320 (19)
CHUK		kinase	Activated	5.052	bias	5.86e-15	ACKR3,ATF3,CCL2,CCL3L3,CCL4,CCL5,CSF1,CSF2,CTSB,CTSZ,CXCL10,CXCL2,GADD45B,GBP2,ICAM1,IFIT2,IL10,IL12B,IL17A,IL1RN,ISG15,ITGB3,NOCT,NR6A1,PLA2G4A,PTGS2,PTX3,RGS16,SGK1,SOCS3,TNF,TNFAIP2,TNFAIP3,VEGFB	284 (13)
prostaglandin E2		chemical - endogenous mammalian		1.359	bias	6.71e-15	ATF3,BIRC3,CCL2,CCL20,CCL22,CCL3L3,CCL4,CCL5,CCL8,CCR7,CD83,CSF1,CXCL10,DUSP1,ICAM1,IDO1,IER3,IL10,IL12B,IL17A,IL1RN,IL23A,IL27,IL2RA,IL7R,IRF4,KLF4,MRC1,MXI1,NFIL3,NOS2,OSM,PLA2G4A,PLK2,PTGS2,RUNX2,SOCS3,TBX21,THBD,TNF,TNFAIP6	220 (15)
OSM	3.145	cytokine	Activated	4.449	bias	6.76e-15	ABCA1,ACSL5,ADAMTS4,ADAMTS5,BAMBI,BHLHE40,CCL2,CCL20,CCL5,CDA,CHI3L1,CHI3L2,CLDN4,CPM,CSF2,CSF3,CTSL,CXCL10,CXCL2,DNAH17,EVPL,GAB1,GADD45G,GBP2,GLUL,HSD11B1,ICAM1,ID2,IGFBP3,IL10,IL33,IL7,IRF1,ISG20,JAG1,LIF,MGLL,MRC1,MSC,NEDD4L,NMB,NOS2,OSM,PKIG,PLA2G4A,PPP3CC,SAA1,SOCS3,STAT1,TCN1,TIMP1,TM4SF1,TNF,TNFAIP2,ZBTB43,ZHX2	226 (17)
IL21		cytokine	Activated	3.373	bias	8.37e-15	ARG2,BATF,CCL20,CCL3L3,CCL4,CCL5,CCR7,CSF2,CXCL10,GBP5,GBP6,HERC6,ID2,IDO1,IFIT2,IFIT3,IL10,IL12RB2,IL17A,IL23A,IL2RA,IL7R,IL9,IRF4,ISG15,NOS2,RSAD2,SOCS3,STAT4,TBX21,TNF	255 (18)
IRAK4		kinase		1.302	bias	9.96e-15	ATF3,BIRC3,CCL20,CXCL10,CXCL2,EDN1,GEM,IFRD1,IL10,IL12B,IL23A,IRF1,IRF4,LIF,NFKBIZ,NOCT,NOS2,RGS16,TNF,TNFAIP3,ZC3H12A	259 (13)
Tgf beta		group		0.553	bias	1.62e-14	ABCA1,BAMBI,BHLHE40,CCL2,CCL3L3,CCL4,CCL5,CCR7,CDK6,CFLAR,CSF1,CSF2,CSF3,CTSK,CXCL10,CXCL2,EDN1,GADD45B,GUSB,IDO1,IGFBP3,IL10,IL12B,IL1RN,IL9,ITGB3,JAG1,LIF,MET,NOS2,PTGS2,RUNX2,SOCS3,TBX21,TIMP1,TNF	301 (19)
IL12A		cytokine		1.019	bias	2.4e-14	CCL5,CFLAR,CXCL10,EBI3,ICAM1,IL10,IL12B,IL12RB2,IL17A,IL23A,IL27,LTA,NOS2,PECAM1,SOCS3,STAT1,STAT4,TNF	237 (18)
stallimycin		biologic drug	Activated	3.396	bias	2.49e-14	CSF1,CXCL10,IFIH1,IFIT2,IFIT3,IL36G,IL7,IL7R,IL9,INHBA,IRF1,IRF4,ISG15,NOS2,STAT1,TNF,TNFSF4	184 (11)
TLR2		transmembrane receptor	Activated	4.875	bias	2.53e-14	ATF3,CCL2,CCL3L3,CCL5,CISH,CSF2,CSF3,CXCL10,CXCL2,CYP27B1,DUSP1,EBI3,GDNF,ICAM1,IL10,IL12B,IL17A,IL1RN,IL23A,IL27,IL2RA,IL33,IRF1,NOS2,PTGS2,PTX3,SCD,SOCS3,TBX21,TNF	208 (16)
simvastatin		chemical drug		0.128		2.69e-14	ABCA1,CCL2,CCL20,CD9,CFLAR,CXCL2,CYP3A4,EDN1,ENC1,FADS2,HMGCR,HS3ST1,ICAM1,IGFBP3,IL10,IL12B,IL23A,IL27,IRF1,KLF4,LGALS8,NOS2,PPARA,PTGS2,RHOB,SDC4,SOAT1,SOCS3,STAT1,STAT4,THBD,TIMP1,TNF	270 (19)
Fcer1		complex	Activated	3.909	bias	2.8e-14	CCL2,CCL3L3,CCL4,CCL5,CD83,CFLAR,CSF1,CSF2,IDO1,IFIT2,IL10,IL1RN,IL33,INHBA,ITPR1,LIF,MRC1,TNF,TNFSF4	241 (18)
LY294002		chemical - kinase inhibitor	Inhibited	-6.333	bias	3.05e-14	ABCA1,ACKR3,ATF3,BHLHE40,BIRC3,CCL2,CCL5,CCL8,CD274,CD83,CDK6,CFLAR,CLDN4,CSF2,CSF3,CXCL10,CXCL2,DUSP1,DUSP4,EFNB2,EPAS1,GEM,GPD2,HMGCR,ICAM1,IER3,IGFBP3,IL10,IL12B,IL17A,IL19,IL1RN,IRF1,ISG20,ITGAV,ITGB3,LIF,MEIS2,NOS2,P2RY6,PIM1,PLK2,PTGS2,RUNX2,S1PR1,SCD,SFN,SGK1,SOCS3,TFPI2,THBD,TNF,TNFAIP3	306 (21)
bee venom		chemical - endogenous non-mammalian	Activated	2.378	bias	3.8e-14	CCL5,GADD45A,GRASP,HSPB1,ICAM1,IFRD1,IL10,IRF1,ITGAV,ITPKC,KLF4,NFIL3,NOS2,NUPR1,OSM,PPP1R15A,PTGS2,SOCS3,THBD,TNF,TNFAIP2,TNFAIP3,YBX3	246 (14)
IRF3		transcription regulator	Activated	2.926	bias	3.88e-14	ADAM9,ARG2,B4GALT5,BIRC3,CCL2,CCL3L3,CCL4,CCL5,CD274,CXCL10,GBP5,IFIH1,IFIT2,IFIT3,IL10,IL12B,IL17A,IL23A,IL27,IRF1,ISG15,ISG20,NOS2,NR3C1,PNP,PRNP,RSAD2,STAT1,TNF,TNFAIP3,TNFSF15,TNFSF4	176 (14)
MAP2K1		kinase	Activated	4.261	bias	4.81e-14	ATF3,BIRC3,CCL2,CCL3L3,CCL4,CCL5,CD274,CFLAR,CSF2,CTSB,DUSP1,DUSP5,GUSB,ITGB3,LGALS3,NOS2,OLFM4,OSM,PECAM1,PIM1,PLA2G4A,PTGS2,PTPN13,RAB38,RRAGD,RUNX2,SMAD3,TFPI2,TGM2,TNF	228 (19)
SASH1		other	Activated	4.472	bias	5.05e-14	ARID5A,CCL4,CXCL10,EDN1,IFIT2,IFIT3,IL12B,INHBA,IRF1,ISG15,ISG20,LTA,MET,NFKBIZ,NMI,PELI1,PTGS2,RSAD2,STAT1,TNF	154 (7)
calcitriol		chemical drug		0.741		5.96e-14	ADHFE1,ARHGEF3,ATIC,BATF,CCL20,CISH,CSF1,CSF2,CTSK,CXCL10,CXCL2,CYP27B1,CYP3A4,DCSTAMP,DUSP1,EDN1,EHF,EZH2,FBXL2,GADD45A,GADD45G,GEM,ID2,IER3,IGFBP3,IL10,IL12B,IL17A,IL1RN,IL2RA,IRF4,ISG15,KCTD12,KLF4,LBH,LPAR1,MRC1,NOD2,NUPR1,PDP2,PISD,PPIF,PTGS2,RAB38,RBPMS,RSAD2,SERPINB9,SOAT1,SOCS3,STXBP6,TBX21,TCF19,THBD,THRA,TNF,TNFAIP3	229 (18)
SOCS1		other	Inhibited	-3.516	bias	6.33e-14	BID,CCL2,CCR7,CFLAR,CISH,CSF3,CXCL10,CXCL2,DUSP1,GBP5,GBP6,ICAM1,IFIH1,IFIT2,IFIT3,IL17A,IRF1,ISG15,ISG20,NOS2,PTGS2,SOCS3,STAT1,STAT5A,TGM2,TNF	205 (18)
IL10RA		transmembrane receptor	Inhibited	-2.75		7.15e-14	ARG2,BOC,CACHD1,CCL22,CCL5,CCR7,CFB,DCSTAMP,DRAM1,EDN1,EHF,FABP5,GBP2,GBP5,GBP6,GDA,HPSE,IL12B,IL17A,IL18BP,IL1RN,IL23A,INHBA,IRF1,MLKL,NOS2,PMP22,RSAD2,S1PR1,SCIN,SELENBP1,SERPINB9,SLAMF8,SOCS3,STARD8,STAT1,TGM2,TGM3,TNF,TNFSF15	217 (18)
STAT5A	1.835	transcription regulator	Activated	2.497		7.62e-14	BIRC3,CCL3L3,CDK6,CEMIP,CFLAR,CISH,CYP27B1,DUSP5,EPAS1,EZH2,GADD45A,GADD45G,ICAM1,ID2,IL12RB2,IL2RA,IL7R,IL9,IRF1,LTA,OSM,PIM1,PRSS23,RAB19,RIN2,RUNX2,S1PR5,SELENBP1,SOCS3,STAT5A,TBX21,TCEAL1,TM4SF1,TNF,TNFRSF18,TNFRSF25,TNFSF4,TRAF4	299 (23)
JAK		group	Activated	2.704	bias	8.27e-14	CCL2,CD83,CXCL10,IFIH1,IFIT2,IFIT3,IL10,IL12B,IL17A,IL33,ISG15,PTGS2,RSAD2,SOCS3,STAT1,STAT5A	211 (16)
C5		cytokine		1.386	bias	8.8e-14	ATF3,CCL2,CCL3L3,CCL4,CCL5,CSF1,CSF2,CSF3,CXCL10,CXCL2,CYP3A4,EFNB2,ICAM1,IL10,IL12B,IL17A,IL23A,IL27,IL9,MET,PLK3,PPP1R15A,TNF,TNFAIP2,TNFAIP3	231 (14)
Tnf (family)		group	Activated	3.642	bias	9.13e-14	ADAMTS5,ATF3,BIRC3,CCL2,CCL4,CCL5,CCL8,CFLAR,CLDN4,CSF1,CXCL10,CYP3A4,ESM1,GJA5,HSD11B1,ICAM1,IL12B,IL12RB2,IL33,INHBA,JAG1,NOS2,PTGS2,RUNX2,SAA1,SOCS3,TNFAIP3	194 (14)
NPC1	1.7	transporter		-1.176	bias	1.28e-13	ABCA1,CCL3L3,CTSB,CTSK,CYP27A1,GUSB,HMGCR,LGALS3,MYLIP,NPC1,NPC2,PTGS2,SCD,STAT1,STAT4,TNF	242 (20)
IL13		cytokine	Activated	2.526	bias	1.39e-13	ABCA1,ACKR3,ADA,ARG2,ATF3,BATF,BID,CCL2,CCL20,CCL22,CCL3L3,CCL4,CCL5,CD48,CHI3L1,CISH,CSF1,CTSB,CTSK,CXCL2,EPAS1,EZR,FADS2,G0S2,HPSE,HRH1,HSD11B1,ICAM1,IDO1,IL10,IL12B,IL17A,IL1RN,IL23A,JAG1,MRC1,NOS2,PLA2G4A,PTGS2,RIN2,SOCS3,SPINT1,TGM2,TIMP1,TNF	246 (18)
HGF		growth factor	Activated	3.423	bias	1.8e-13	ACKR3,ADGRF5,ATF3,BIRC3,CCL2,CCL4,CCL5,CFLAR,CNTFR,CSF1,CTSK,CXCL2,DUSP4,EDN1,EFNB2,EHF,ESM1,GAB1,GEM,ICAM1,IGFBP3,IL10,IL12B,IL27RA,INHBA,INSIG1,ISG15,ISG20,ITGB8,ITPR1,LTA,MET,MPC1,NOS2,NPC1,PIM1,PMP22,PTGS2,PTTG1,RHOB,RUNX2,SGK1,SOCS3,THBD,TIMP1,TMEM158,TNF,TNFAIP2,TNFAIP3,TNFAIP6,TNFSF15	268 (17)
TLR7		transmembrane receptor	Activated	4.95	bias	2.18e-13	ATF3,CCL2,CCL20,CCL4,CCL5,CCR7,CD274,CD83,CXCL10,CXCL2,ICAM1,IDO1,IER3,IFIT3,IL10,IL12B,IL23A,IL27,IRF1,ISG15,ISG20,PTX3,RSAD2,STAT1,TNF,TNFAIP3,ZC3H12A	213 (16)
cycloheximide		chemical reagent	Activated	2.03		3.22e-13	BIRC3,CCK,CCL2,CCL20,CCL4,CFLAR,CSF1,CSF2,CXCL10,CXCL2,DUSP1,EDN1,GADD45A,GADD45B,GADD45G,GNAI1,GRASP,HEXA,HSD11B1,ICAM1,IL1RN,IL7R,ISG20,ITGB3,NOS2,NR3C1,OSM,PTGS2,PTPN13,PTX3,RHOB,RSAD2,RUNX2,SCD,SOCS3,THBD,THRA,TIMP1,TNF,TNFAIP2,TNFAIP3,TNFAIP6,TOB1	290 (15)
DOCK8		other	Activated	4.359	bias	3.42e-13	ARID5A,CCL4,CXCL10,EDN1,IFIT2,IFIT3,IL12B,INHBA,IRF1,ISG15,ISG20,LTA,NFKBIZ,NMI,PELI1,PTGS2,RSAD2,STAT1,TNF
bromodeoxyuridine		chemical drug	Activated	4.057	bias	3.73e-13	CSF1,CXCL10,IFIH1,IFIT2,IFIT3,IGFBP3,IL36G,IL7,IL7R,IL9,INHBA,IRF1,IRF4,ISG15,STAT1,TNF,TNFSF4	184 (11)
IL12 (family)		group	Activated	4.214	bias	3.98e-13	ATF3,CCL4,CCL5,CD274,CFLAR,CSF2,GIMAP4,IDO1,IL10,IL12RB2,IL17A,IL27RA,IL2RA,IL9,IRF1,IRF4,LIF,NFIL3,NFKBIZ,PIM1,STAT1,STAT4,TBX21,TNF	247 (17)
MAPK1		kinase		-0.001		4.57e-13	ARG2,ATF3,CCL2,CCL3L3,CCL4,CCL5,CFB,CISH,CTSB,DUSP1,DUSP2,FAM20A,GBP2,GBP5,IFIH1,IFIT2,IFIT3,IL1RN,IL2RA,ISG15,ISG20,ITGAV,ITGB3,LGALS3,LIF,MECP2,MYBL2,NMI,NOS2,NUPR1,OSM,PLA2G4A,PLA2G4F,PTGS2,RGS16,SPSB1,STAT1,TBX21,TMEM158,TNF,TRIM25	226 (20)
Ifn		group	Activated	3.427	bias	4.83e-13	APOBEC3A,CD83,CXCL10,EDN1,ICAM1,IDO1,IFIH1,IL10,IL12B,IL17A,IL23A,IL27,IL33,IL7,IL9,IRF1,ISG15,ISG20,NOS2,NUB1,PECAM1,RSAD2,STAT1,TFRC	204 (17)
CD28		transmembrane receptor	Inhibited	-4.148	bias	5.54e-13	BHLHE40,CBLB,CCL4,CD274,CDK6,CFLAR,CISH,CRLF2,CSF2,CXCL2,EBI3,FBL,GBP2,IL10,IL12RB2,IL17A,IL27,IL27RA,IL2RA,IL7,IL7R,IL9,IRF1,IRF4,LTA,PNP,PPA1,PTGS2,RHOC,RNF128,SOCS3,STEAP2,TBX21,TFPI2,TFRC,TNF,TNFAIP3,TNFRSF18,TNFSF18,TOB1,TUBB1	238 (17)
IL7	2.374	cytokine	Activated	2.494	bias	6.61e-13	BLNK,CBLB,CCL2,CCL4,CD274,CDK6,CFLAR,CISH,CSF1,CSF2,CTSK,CXCL2,DUSP5,IL17A,IL2RA,IL7,IL7R,LIF,LTA,NTN1,PIM1,RGS16,RUNX2,S1PR1,SOCS3,TNF	283 (19)
peptidoglycan		chemical - endogenous non-mammalian	Activated	4.514	bias	6.65e-13	CCL2,CCL20,CCL3L3,CCL4,CCL5,CCL8,CD274,CSF2,CSF3,CXCL10,CXCL2,DUSP1,ICAM1,IL10,IL12B,IL17A,IL1RN,IL23A,IL2RA,IRF1,NOS2,PTGS2,TNF	194 (13)
Pam3-Cys-Ser-Lys4		chemical reagent	Activated	4.027	bias	7.1e-13	CCL2,CCL3L3,CCL4,CCL5,CCL8,CCR7,CD274,CD83,CSF2,CSF3,CXCL2,ICAM1,IDO1,IL10,IL12B,IL17A,IL23A,IL2RA,IRF1,NFKBIZ,NOS2,PTGS2,STAT1,TNF	205 (15)
CD14		transmembrane receptor	Activated	3.66	bias	1.03e-12	CCL2,CCL3L3,CCL4,CCL5,CISH,CXCL10,CXCL2,CYP27B1,ICAM1,IL10,IL12B,IL2RA,NOS2,PTGS2,SOCS3,TNF,TNFAIP3	207 (16)
KRAS		enzyme		1.215		1.06e-12	ABCA1,AGO2,AGRN,ATF3,BIRC3,CD274,CSF3,CXCL10,DUSP1,DUSP4,DUSP5,EZH2,GADD45A,GLUL,HEXA,HSPB1,IDO1,IER3,IL17A,IL33,IRF1,ISG15,ITGB3,LBH,LIF,MAPK12,MET,MYBL2,NFKBIB,NOS2,NPC1,NR3C1,PECAM1,PIM1,PTGS2,RAB20,RHOB,RHOC,SDC4,SEMA7A,SLCO4A1,SOAT1,STAT1,STAT5A,TBX21,TESC,TLE3,TNF,TNFAIP2,UBE2S	287 (20)
Vegf		group	Activated	4.135	bias	1.43e-12	ACKR3,ADGRF5,ATF3,CFLAR,CHI3L1,CNTFR,CSF2,CXCL10,DENND2D,DLL4,DUSP4,DUSP5,EDN1,EFNB2,EHF,ESM1,FRMD6,GAB1,GEM,GJB2,HOPX,HPSE,ICAM1,IGFBP3,IL12B,IL27RA,INHBA,INSIG1,IRF1,ISG20,ITGB8,ITPR1,KIAA1671,LPAR1,MET,MPC1,NPC1,PMP22,PTGS2,RNF125,SFN,SGK1,SOCS3,THBD,TIMP1,TMEM158,TNF,TNFSF15,UGCG,VEGFB	230 (18)
BTK		kinase		-1.466		1.47e-12	CCL4,CCR7,CD274,CDK6,CISH,CTSA,CXCL10,DCSTAMP,FABP5,IFIT3,IL10,IL12B,IL27,IL2RA,IRF1,IRF4,ISG15,ISG20,ITGAV,ITGB3,PIM1,STAT1,TNF	230 (19)
fluticasone propionate		chemical drug		-1.526		1.69e-12	ADAM9,CCL2,CCL20,CCL22,CCL5,CCL8,CD83,CFB,CHI3L1,CSF2,CXCL10,CXCL2,CYP27B1,EBI3,GADD45B,GAL,GBP5,GJB2,HSD11B1,IL10,IL18BP,IL1RN,SDC4,SLAMF1,STAT1,TGM2,TIMP1,TM4SF19	288 (20)
E. coli lipopolysaccharide		chemical - endogenous non-mammalian	Activated	4.145	bias	1.72e-12	CCL2,CCL22,CCL4,CCL5,CCL8,CCR7,CD83,CXCL10,CXCL2,EBI3,ICAM1,IL10,IL12B,IL23A,IL27,NOS2,SOCS3,TNF	240 (20)
DDX58		enzyme	Activated	3.997	bias	1.96e-12	CCL5,CXCL10,DLL1,GEM,IFIH1,IFIT2,IFIT3,IRF1,ISG15,ISG20,KLF4,NMI,PTGS2,RSAD2,SOCS3,STAT1,TNF	197 (15)
N-acetylmuramyl-L-alanyl-D-isoglutamine		chemical - endogenous non-mammalian	Activated	3.208	bias	1.96e-12	ABCA1,CCL2,CCL4,CCL8,CXCL2,FZD4,ICAM1,IDO1,IL10,IL12B,IL23A,IL2RA,ITGAV,ITGB3,NOD2,PTGS2,TNF	214 (17)
5-N-ethylcarboxamido adenosine		chemical reagent		0.484		2.02e-12	ACKR3,ARG2,BHLHE40,CCL2,CCL20,CCL3L3,CSF2RB,GADD45A,GDNF,IFIT2,IFIT3,IL10,IL23A,INHBA,NFIL3,NOS2,PLK2,SOCS3,SPINT1,THBD,TNF,USP2	291 (21)
RNASE2		enzyme	Activated	3.651	bias	2.16e-12	CCL2,CCL22,CCL4,CCL5,CCL8,CD83,CSF1,CXCL10,IL10,IL12B,IL2RA,IL7,OSM,TNF	185 (12)
SAA		group	Activated	3.538	bias	2.16e-12	CCL2,CSF1,CSF3,ICAM1,IL10,IL12B,IL17A,IL1RN,IL23A,IL33,IRF4,MRC1,NOS2,PTGS2	230 (16)
progesterone		chemical - endogenous mammalian	Activated	3.003	bias	2.42e-12	ATF3,ATP6V1B2,BHLHE40,BIRC3,C9orf72,CCL2,CFB,CLDN4,CNDP2,CSF1,CXCL10,CYP3A4,ENC1,EPAS1,EZR,GAL,GJB2,HMGCR,HOPX,HSD11B1,HUNK,ICAM1,IGFBP3,IL10,IL12B,IL27,INHBA,ISG20,KCNK1,LGALS3,LIF,MRC1,NFIL3,NOS2,NPC1,PISD,PLK2,PMP22,PRNP,PRSS23,PTGS2,PTX3,SCD,SGK1,SPSB1,STAT5A,STEAP1,TGM1,THBD,TIAM1,TIMP1,TNF,TNFRSF21,UGCG,VEGFB	296 (20)
IL1RN	4.148	cytokine	Inhibited	-4.202	bias	2.56e-12	ATF3,CCL2,CCL20,CXCL10,HERC6,HSD11B1,ICAM1,IFIH1,IFIT3,IL10,IL17A,IL18BP,IL23A,IRF1,ISG20,LIF,NOS2,PELI1,PTGS2,RSAD2,THEMIS2,TIMP1,TNF,UBD	228 (16)
CD3		complex	Inhibited	-5.413	bias	2.92e-12	ALAS1,BAMBI,BATF,BIRC3,CCL20,CCL22,CCL3L3,CCL4,CCL5,CD274,CD83,CDK6,CFLAR,CISH,CRLF2,CSF2,CXCL10,DUSP2,EBI3,FBL,GPRC5A,ICAM1,IL10,IL12B,IL12RB2,IL17A,IL27RA,IL2RA,IL7R,IL9,IRF1,IRF4,ITPR1,LTA,NOS2,PNP,PPA1,PTGS2,PTPN13,RHOC,RHOH,RNF128,SOCS3,STAT1,STEAP2,TBX21,TFPI2,TFRC,TGM2,TNF,TNFAIP3,TNFRSF18,TNFRSF25,TNFSF18,TNFSF4,TRIM25,TUBB1	247 (18)
TMEM173		other	Activated	3.45	bias	3.33e-12	CCL5,CSF2,CXCL10,CXCL2,GBP5,HOPX,IFIT3,IL10,IL33,ISG15,LIF,NOS2,RGS16,RSAD2,TNF	241 (17)
CLEC7A		transmembrane receptor	Activated	3.221	bias	3.89e-12	CCL2,CCL22,CSF3,CXCL2,IL10,IL12B,IL17A,IL23A,IL33,PTGS2,TNF,TNFSF4	221 (17)
EP300		transcription regulator	Activated	2.619	bias	3.91e-12	AMPD1,ARHGEF3,ARID5A,CCL2,CCR7,CFLAR,CRIM1,CRISPLD2,CSF3,DUSP1,DUSP4,EDN1,GIMAP4,HMGCR,HSD11B1,ID2,IL12B,IL17A,IL2RA,IL7R,IL9,ITGA9,LTA,MCF2L,MFHAS1,NOS2,NR3C1,NTN1,PDE10A,PLA2G4A,PPARA,PTGS2,RSAD2,RUNX2,SDC1,SDC4,SLAMF1,SOCS3,SPSB1,STAT4,TESC,TNF,TNFAIP3,WFS1,YPEL2	240 (22)
CAMP		other		1.877	bias	5.17e-12	CCL2,CCL20,CCL4,CCL5,CCR7,CD83,CSF1,CSF2,CXCL10,ICAM1,IL10,IL12B,IL1RN,IL23A,IL36G,NOS2,PTGS2,TNF,TNFAIP2,TNFAIP3	213 (17)
TNFRSF1A		transmembrane receptor	Activated	2.229	bias	7.16e-12	BIRC3,CCL2,CCL20,CCL3L3,CCL4,CCL5,CD83,CFLAR,CSF2,CSF3,CXCL10,CXCL2,ICAM1,IER3,IL10,IL12B,IL17A,IL23A,NOS2,PIM1,SAA1,SOCS3,TBX21,TFRC,THBD,TNF	210 (14)
SP600125		chemical - kinase inhibitor	Inhibited	-4.178	bias	7.37e-12	ABCA1,ADAMTS4,ATF3,ATP6AP2,CCL2,CCL4,CCL5,CD83,CLDN4,CXCL10,CXCL2,CYP27B1,FABP5,GADD45A,ICAM1,IL10,IL12B,IL17A,IL23A,IL2RA,ISG15,NOS2,PLA2G4A,PTGS2,PTX3,SCD,SOCS3,TNF,TNFRSF18,TRPC6	208 (16)
ERK1/2		group	Activated	4.223	bias	7.51e-12	ABCA1,BIRC3,CCK,CCL2,CCL20,CCL22,CCL3L3,CCL4,CCL5,CCL8,CCR7,CFLAR,CSF2,CTSB,CXCL10,DUSP1,DUSP4,ECE1,EDN1,EFNB2,EZR,ICAM1,IGFBP3,IL10,IL12B,IL19,IL2RA,ITGB3,NOS2,PTGS2,RHOC,RUNX2,SGK1,SOCS3,TIMP1,TNF	249 (18)
DUSP1	2.292	phosphatase	Inhibited	-2.023		7.51e-12	CCL2,CCL20,CCL3L3,CCL4,CSF2,CXCL2,DUSP1,GJB2,IER3,IL10,IL12RB2,IL1RN,ISG20,MGLL,MRC1,NOS2,OSM,PTGS2,THBD,TNF,Wfdc21	234 (18)
CREBBP		transcription regulator	Activated	2.744	bias	8.28e-12	ALAS1,AMPD1,ARHGEF3,ARID5A,CCL5,CCR7,CRIM1,CRISPLD2,CSF1,CXCL10,DUSP1,DUSP4,GIMAP4,HSD11B1,IL10,IL17A,IL2RA,IL7R,IRF1,ISG15,ITGA9,LTA,MCF2L,MFHAS1,NOS2,NR3C1,NTN1,PDE10A,PTGS2,RSAD2,RUNX2,SDC1,SDC4,SLAMF1,SOCS3,SPSB1,STAT4,TESC,TNF,TNFAIP3,WFS1,YPEL2	252 (18)
cyclosporin A		biologic drug	Inhibited	-2.468	bias	8.57e-12	ALAS1,ATF3,ATP1A1,BATF,BIRC3,CBLB,CCL2,CCL4,CCL5,CCR7,CD83,CFLAR,CLDN4,CYP27A1,CYP3A4,EDN1,FADD,HMGCR,ICAM1,IER3,IL10,IL12B,IL12RB2,IL17A,IL19,IL2RA,IRF4,ITGAV,ITPR1,LAT,LGALS3,LTA,MRC1,NOS2,NR3C1,PTGS2,RUNX2,SCD,SLAMF1,STAT5A,TBX21,TGIF1,TIMP1,TLE3,TNF	262 (18)
RNASE1		enzyme	Activated	3.286	bias	9.13e-12	CCL2,CCL22,CCL4,CCL5,CCL8,CXCL10,IL12B,IL2RA,IL7,OSM,TNF
cholesterol		chemical - endogenous mammalian		1.395	bias	9.42e-12	ABCA1,ATF3,CCL2,CTSK,CXCL10,CXCL2,CYP27A1,FABP5,GNAI1,HMGCR,ICAM1,IL10,IL12B,IL1RN,INHBA,INSIG1,LAPTM5,LGALS3,PLTP,PSAT1,PTGIR,PTGS2,RGS16,SAA1,SCD,SLC28A3,SOCS3,TIMP1,TM4SF19,TNF	241 (22)
SYK		kinase		0.048		9.87e-12	ARID5A,ATP8A1,BIRC3,CCL2,CCL4,CCL5,CCR7,CSF2,CXCL10,EDN1,GADD45A,IL10,IRF1,ITGB3,PIM1,RASSF4,TFPI2,TNF,YPEL2	214 (19)
CpG ODN 1668		chemical reagent	Activated	3.76	bias	1e-11	CCL3L3,CCL4,CFLAR,CSF3,CXCL10,ICAM1,IL10,IL12B,IL17A,IL23A,IL27,ISG15,PTGS2,SOCS3,STAT1,TNF	211 (17)
ionomycin		chemical reagent	Activated	4.155	bias	1.02e-11	BID,CLDN4,CSF2,CSF3,CXCL10,DUSP1,DUSP2,EBI3,HPSE,ICAM1,IL10,IL12B,IL17A,IL2RA,IL9,IRF4,KCNJ2,LAT,LTA,NFIL3,PIM1,PTGS2,PTPN1,SGK1,TBX21,TNF,TNFRSF18	241 (22)
PTEN		phosphatase		0.37		1.08e-11	CCL5,CCR7,CD274,CDK6,CTSB,CTSZ,CXCL10,CXCL2,CYP27A1,DUSP1,EDN1,EFNB2,EPAS1,ETV3,G0S2,GJA5,HEXB,HMGCR,IFRD1,IGFBP3,IL10,IL12B,IL17A,IL23A,ISG15,JAG1,LGALS3,MET,MRC1,MYBL2,NEU1,NFIL3,NOS2,PIM1,PTGS2,SAT1,SCD,SDC1,SDC4,SOAT1,SOCS3,STAT5A,STEAP1,TNF,TRAF4,VEGFB	294 (20)
CREB1		transcription regulator	Activated	4.492	bias	1.09e-11	ABCA1,ALAS1,APOLD1,ARHGAP35,ATF3,ATP1A1,ATP6V0D1,BHLHE40,CARS,CCK,CCL4,CD9,CDA,CRIM1,CXCL2,DUSP1,EBI3,EDN1,ETV3,FRMD6,GADD45A,GADD45B,GADD45G,GAL,GDA,GEM,HMGCR,HSD11B1,IER3,IL2RA,INHBA,KLF4,LGALS8,MRC1,MYBL2,NFIL3,NOS2,NPC2,NRP2,PLA2G4A,PPP1R15A,PTGS2,RASGEF1B,SAT1,SCD,SEMA7A,SGK1,TFRC,TGIF1,TMBIM1,TNF,TRPC6	259 (19)
Map3k7		kinase	Activated	3.598	bias	1.14e-11	BHLHE40,CCL3L3,CCL4,CCL5,CSF2,CXCL10,EDN1,IFIT2,IL10,ISG15,ISG20,NFKBIZ,NOD2,PTGS2,RSAD2,SCD,TNF	246 (20)
TBK1		kinase	Activated	3.66	bias	1.24e-11	CCL3L3,CCL4,CCL5,CXCL10,CXCL2,EDN1,ICAM1,IFIT2,IL10,IL12B,INHBA,ISG15,ISG20,NFKBIZ,NMI,PTGS2,RSAD2,TNF,ZC3H12A	225 (14)
IKBKE		kinase		1.832	bias	1.5e-11	BIRC3,CCL3L3,CCL5,CSF3,CXCL10,CXCL2,IFIH1,IFIT2,IFIT3,IL17A,IL23A,IL7,NOS2,PTGS2,RSAD2,STAT1,TNF	197 (15)
GW3965		chemical reagent		-0.927		1.84e-11	ABCA1,ARG2,CCL4,CCL5,CSF3,CXCL10,DGAT2,GNAI1,HCAR3,IL12B,IL1RN,MYLIP,NOS2,PLTP,PTGS2,SCD,SOCS3,TNF	224 (19)
MAP3K14		kinase	Activated	3.353	bias	1.97e-11	BIRC3,CCL5,CFLAR,CXCL2,GADD45A,ICAM1,IL10,IL7R,IL9,LTA,NOS2,PLA2G4A,PTGS2,TNF,TNFAIP3,TNFAIP6,TNFSF4	228 (13)
IRF1	1.74	transcription regulator	Activated	3.587	bias	1.97e-11	CCL2,CCL20,CCL5,CD274,CFB,CXCL10,CXCL2,GBP2,IDO1,IFIH1,IFIT2,IFIT3,IL10,IL12B,IL12RB2,IL18BP,IL27,IL7,IRF1,IRF4,ISG15,NOS2,PTGS2,RSAD2,STAT1,TNF	232 (16)
PRKCD		kinase	Activated	4.036	bias	2.01e-11	ABCA1,APOBEC3A,BIRC3,CCL2,CCL20,CCL5,CEMIP,CSF2,CTSB,CXCL10,DENND3,GEM,GPRC5A,HRH1,ICAM1,IL10,IL12B,IL1RN,LBH,LIF,NOCT,NOS2,PLAGL2,PPP1R15A,PTGS2,TNF,UGCG	231 (16)
PI3K (complex)		complex	Activated	4.216	bias	2.02e-11	ABCA1,ATF3,BIRC3,CCL2,CCL4,CD274,CFLAR,CXCL10,DLL4,DUSP1,FABP5,HMGCR,ICAM1,IL10,IL12B,IL17A,IL1RN,IL23A,IL33,IL7R,LTBP2,MRC1,NOS2,PIM1,PLA2G4A,PTGS2,RHOB,SGK1,SOAT1,SOCS3,TGM2,TNF,TNFAIP3,TRIM25,UGCG	274 (17)
VEGFA		growth factor	Activated	3.858	bias	2.02e-11	ALAS1,ARG2,BATF,CCL2,CCL3L3,CD83,CSF2,CSF3,CTSB,CXCL10,CXCL2,DLL1,DLL4,DUSP4,DUSP5,EDN1,EFNB2,EPAS1,ICAM1,IL10,IL17A,ITGAV,ITGB3,NOS2,PECAM1,PIM1,PPA1,PTGS2,RUNX2,STARD8,TFPI2,THBD,TIMP1,TNF,TRPC6	187 (14)
IGF1		growth factor	Activated	4.141	bias	2.11e-11	ABCA1,ADA,BHLHE40,BIRC3,CCL3L3,CCL4,CCL5,CFLAR,CISH,CSF1,CYP27B1,DUSP1,EDN1,EFNB2,EPAS1,GADD45A,GADD45G,GDNF,GPD2,HMGCR,HSD11B1,HSD17B11,ICAM1,ID2,IER3,IGFBP3,IL10,ITGAV,MXI1,NOS2,NR3C1,NTN1,NUPR1,PIM1,PLK2,PPP3CC,PRNP,PTGS2,RUNX2,SCD,SFN,SGK1,SOCS3,TNF,UGCG,YBX3	341 (26)
enterotoxin B		biologic drug	Activated	4.046	bias	2.34e-11	CCL2,CCL22,CCL3L3,CCL4,CCL5,CSF2RB,CSF3,CXCL10,CXCL2,ICAM1,IL10,IL12B,IL17A,IL2RA,IL33,LIF,RSAD2,TNF	290 (14)
IFNA2		cytokine	Activated	4.779	bias	2.42e-11	CCL2,CCL5,CCL8,CISH,CXCL10,GBP2,GEM,HERC6,IDO1,IFIH1,IFIT2,IFIT3,IL10,IL12RB2,IL2RA,IRF1,ISG15,ISG20,MET,PTTG1,RSAD2,SDC1,SERPINB9,SOCS3,STAT1,STAT4,TBX21,TGM2,THEMIS2,TNF,UBD	197 (16)
ATP-gamma-S		chemical reagent		0.132		2.56e-11	CCL2,CCL22,CCL4,CCL8,CCR7,CD109,CD33,CD83,CSF1,CXCL2,IDO1,IL10,IL2RA,IL7R,IRF4,PTGS2,TNF	259 (18)
Alpha catenin		group	Inhibited	-4.639	bias	2.8e-11	ADAMTS4,ADAMTS5,BIRC3,CTSB,CXCL10,CXCL2,IL36G,IRF1,NFKBIZ,PTGS2,PTX3,RHOC,SAA1,SGK1,SOCS3,STEAP2,TGM2,TIMP1,TNF,TNFAIP2,TNFAIP3,TNFAIP6	218 (15)
MAP3K7		kinase		1.638	bias	2.96e-11	BIRC3,CCL20,CCL5,CCR7,CFB,CXCL10,CXCL2,GBP2,IFIH1,IFIT2,IFIT3,IL12B,IL19,IL9,IRF1,PTGS2,SAA1,TNF	182 (15)
tacrolimus		chemical drug		-1.948	bias	3.27e-11	BATF,CCL2,CCL4,CCL5,CD48,CXCL10,CXCL2,EDN1,ENC1,IL10,IL17A,IL33,IRF4,ITPR1,LAT,LBH,NOS2,NR3C1,PRNP,PTGS2,RUNX2,SDC3,SLAMF1,STAT5A,TIAM1,TLE3,TNF,TRPM6	260 (19)
CSF3	2.234	cytokine		0.943	bias	4.5e-11	BATF,BIRC3,CCL3L3,CCL5,CCR7,CDK6,CISH,EDN1,GADD45A,GADD45B,GADD45G,GDNF,ICAM1,IL10,IL12B,IL1RN,IL7,LTA,MET,NFIL3,PIM1,SLC20A2,SOCS3,TFRC,TNF,TNFAIP3	223 (17)
IFN alpha/beta		group	Activated	3.985	bias	4.69e-11	BID,CCL2,CCL5,CCR7,CD83,CXCL10,IDO1,IFIT2,IFIT3,IL10,IL27,IL7,IRF1,MRC1,NOS2,RSAD2,SERPINB9,STAT1	234 (17)
PPARG		ligand-dependent nuclear receptor		0.829	bias	4.75e-11	ABCA1,ACSL4,ACSL5,CCL2,CCL22,CCL5,CCR7,CDK6,CSF3,CTSL,CXCL2,DGAT2,EDN1,F11R,FABP5,FAM57B,FBP2,HMGCR,HSD3B7,ICAM1,IGFBP3,IL10,IL17A,IL23A,IL2RA,IL36G,IL9,INSIG1,KLF4,MGLL,NOS2,PECAM1,PPARA,PTGS2,RAB20,RHOB,RUNX2,SAA1,SAT1,SCD,SDC1,SGK1,SOCS3,TNF,TRIB3	239 (22)
genistein		chemical drug		0.373	bias	5.09e-11	ABCA9,ALAS1,ATP6V0D1,ATP6V1G1,CCL2,CCL5,CD164,CFLAR,CTSA,CTSB,CTSK,CTSL,CXCL10,CXCL2,DUSP1,EXT1,GDNF,GJB2,GUSB,HEXA,HEXB,HMGCR,ICAM1,ID2,IFIT2,IL10,KCNJ2,LAPTM5,NEU1,NOS2,NPC1,NPC2,NR3C1,PIM1,PLA2G15,PLK3,PLTP,PTGS2,RRAGC,RUNX2,TNF	278 (21)
etanercept		biologic drug	Inhibited	-3.412	bias	5.58e-11	CCL2,CCL20,CD83,CXCL10,ICAM1,IDO1,IL12B,IL23A,NOS2,PTGS2,STAT1,TNF	276 (15)
IFN Beta		group	Activated	3.157	bias	5.65e-11	ATF3,CCR7,CD274,CD83,CXCL10,CYP3A4,DUSP1,IDO1,IFIH1,IFIT2,IFIT3,IL10,IL17A,IL1RN,IL27,IL9,INSIG1,IRF1,ISG15,NOS2,RSAD2,STAT1,TNF	205 (16)
E. coli serotype 0127B8 lipopolysaccharide		chemical - endogenous non-mammalian	Activated	3.984	bias	5.69e-11	CCL2,CCL5,CXCL10,CXCL2,GDNF,GJA5,GJB2,GLUL,GPR146,IL10,IL12B,IL23A,IL7,IRF1,LGALS3,LIF,NOS2,P2RY6,PTGS2,PTX3,RSAD2,SEMA7A,SMAD3,SOCS3,STAT1,TNF,UBD	246 (17)
Ciap		group	Inhibited	-2.576	bias	5.92e-11	CCL3L3,CCL4,CCL5,CSF2,CSF3,CXCL2,IL10,IL12B,IL17A,IL9,TNF	179 (11)
TLR5		transmembrane receptor	Activated	3.497	bias	6.06e-11	ATF3,CCL20,CCL4,CCL5,CSF2,CSF3,CXCL2,ICAM1,IL10,IL12B,IL17A,IL33,TNF	205 (14)
Nfat (family)		group	Activated	3.794	bias	6.93e-11	CCL2,CCL3L3,CFLAR,CSF2,CTSK,DHRS9,ESM1,ICAM1,IL10,IL17A,IRF4,ITPR1,LBH,LTA,PTGS2,RNF128,SAMD4A,SDC4,TNF	276 (20)
S100A8		other	Activated	2.425		7.63e-11	ADAMTS4,ADAMTS5,ARG2,ATF3,BHLHE40,CCL2,CCL20,CD274,CPM,CSF2RB,CXCL10,CXCL2,GJB2,GPRC5A,ICAM1,IDO1,IL10,IL33,ISG15,KLF15,MCF2L,NOS2,PLK3,RAB20,SGK1,TNF	247 (15)
TP53		transcription regulator	Activated	3.64		8.27e-11	ADA,ARAP2,ATF3,ATP1A1,BHLHE40,BID,BIRC3,CAMK2N1,CARHSP1,CARS,CCL2,CCL3L3,CCL4,CFLAR,CSF1,CSF2,CTSB,CTSK,DHRS9,DRAM1,DUSP1,DUSP2,DUSP4,DUSP5,EDN1,EZH2,EZR,F11R,FERMT2,GADD45A,GADD45B,GADD45G,GDA,GLUL,GNAI1,GTF2H1,HMGCR,HS3ST1,HSPB1,ICAM1,ID2,IER3,IGFBP3,IL10,IL27RA,IL2RA,IL7,INHBA,ISG15,KLF4,LGALS3,LIF,LTB4R,MAPK12,MET,MYBL1,MYBL2,NOS2,NR6A1,NUPR1,OSGIN1,PECAM1,PIM1,PLK2,PLTP,PPP1R13B,PPP1R15A,PRD…	327 (21)
AGN194204		chemical drug	Activated	4.576	bias	8.78e-11	ATF3,ATP1A1,CCL3L3,CCL4,CSF2,DUSP1,ELOVL5,EZH2,Foxp1,GADD45A,GBP2,GNAI1,IL17A,IL2RA,IL7R,IL9,IRF1,LTA,NPC2,PIM1,PRNP,SCD,SCIN,TIMP1,TRAF4
rosiglitazone		chemical drug		0.912	bias	8.82e-11	ACSL5,ADA,ATP1A1,CCL2,CCL3L3,CCL5,CD164,CSF1,CXCL10,CYP3A4,DGAT2,EBI3,FABP5,GBP2,HSD11B1,ICAM1,IFIT2,IL10,IL12B,IL1RN,IL7R,INSIG1,IRF1,KLF4,LTB4R,MET,MGLL,NOS2,PECAM1,PLA2G15,PLTP,PPARA,PTGS2,PTPN1,RUNX2,SCD,SGK1,SOAT1,SOCS3,TBX21,TIMP1,TNF	264 (18)
PTGS2	3.724	enzyme	Activated	3.604	bias	1e-10	BIRC3,CCL2,CCL3L3,CCL4,CCL5,CCR7,CSF3,CTSK,CXCL10,DUSP1,EZR,ICAM1,IGFBP3,IL10,IL23A,ITGAV,NOS2,PLA2G4A,PPA1,PTGS2,RUNX2,SEMA7A,TGM2,TNF,TNFAIP6	260 (19)
PGR		ligand-dependent nuclear receptor	Activated	3.107	bias	1.08e-10	BIRC3,CCL8,EDN1,ENC1,EPAS1,EZR,GAL,GLUL,GPR160,GPRC5A,GRK4,ICAM1,IER3,IL12B,KCNK1,KLF4,NPC1,PISD,PLK2,PPIF,PTGS2,RAB9A,RHOC,SDC1,SGK1,SLC39A8,STAT1,STAT5A,STEAP1,TM4SF1,TNF,TNFRSF21,UGCG	307 (21)
STAT5B		transcription regulator		1.939	bias	1.15e-10	BIRC3,CCL3L3,CDK6,CFLAR,CISH,DGAT2,GADD45A,HEXA,IL2RA,IL9,IRF1,LTA,MYBPHL,OSM,PIM1,PPP1R3C,RAB19,SCD,SOCS3,STAT5A,TNF,TNFRSF25,TNFSF4,TOX,TRAF4	258 (21)
paclitaxel		chemical drug		1.975	bias	1.15e-10	ACKR3,APOBEC3A,ATF3,BHLHE40,BIRC3,CCL2,CD274,CDA,CSF2,CXCL10,CXCL2,CYP3A4,DUSP4,DUSP5,ENPP4,ETV3,G0S2,GADD45B,GFPT2,HPSE,ICAM1,IER3,IGFBP3,IL10,ITPKC,PTGS2,SAT1,SHB,TFPI2,THBD,TMEM158,TNF,TUBB1,UGCG	231 (12)
MOG		other	Activated	3.097	bias	1.24e-10	CCL3L3,CCL5,CD274,CSF2,CXCL10,CXCL2,GDNF,ICAM1,IL10,IL17A,IL23A,IL27,NOS2,PECAM1,TNF	238 (14)
infliximab		biologic drug	Inhibited	-3.978	bias	1.26e-10	BATF,CCL20,CYP27B1,DUSP4,EDN1,G0S2,IL12RB2,IL2RA,IL9,INHBA,LTA,MSC,PTGS2,SLAMF1,TGM3,TNF	290 (19)
KLF2		transcription regulator	Inhibited	-2.34	bias	1.29e-10	ACKR3,CCL2,CCL4,CCL5,CCR7,CXCL2,DLL1,EDN1,EPAS1,GADD45A,HPSE,IL17A,ITGB3,PECAM1,PTGS2,RUNX2,S1PR1,S1PR5,STAT1,TFPI2,TFRC,THBD,TIMP1,TNF	232 (17)
APP		other	Activated	5.374	bias	1.43e-10	ABCA1,ADAMTS4,ARL11,CCL2,CCL20,CCL3L3,CCL4,CCL5,CDK6,CFLAR,CSF1,CSF2,CSF2RB,CTSB,CTTN,CXCL10,CXCL2,EDN1,EPAS1,EXT1,FBL,Foxp1,GAB1,GBP2,GBP6,GDNF,HERC6,HMGCR,HSPB1,ICAM1,IDO1,IFIH1,IFIT2,IL10,IL12B,IL27,INHBA,IRF1,IRF4,ISG20,ITGB3,LGALS3,MAFF,MECP2,MRC1,MXI1,NOS2,NRP2,OSM,PRDX6,PRNP,PTGS2,RSAD2,S1PR1,SDC4,SIGMAR1,SLAMF1,SLAMF8,SOCS3,STX1B,TBC1D4,TNF,TNFAIP2,TNFSF15,TUBA1C,VEGFB	228 (15)
IL5		cytokine	Activated	5.619	bias	1.44e-10	CCL2,CCL22,CCR7,CISH,CSF2,CSF2RB,DUSP5,GADD45A,GADD45G,GBP2,HCAR3,HMGCR,ICAM1,IER3,IL18BP,IL2RA,IL9,ITGAV,LRRC8C,LTA,NABP1,NFIL3,NOS2,PIM1,PMP22,PPIF,PSAT1,RBPMS,RHOH,SGK1,SLC39A8,TNF,UPB1	312 (20)
CpG oligonucleotide		chemical drug	Activated	4.484	bias	1.62e-10	ABCA1,CCL3L3,CCL4,CD83,CSF2,CXCL10,CXCL2,DLL4,GBP6,ICAM1,IDO1,IL10,IL12B,IL23A,IL2RA,IL33,NFKBIZ,NOS2,PLAGL2,PTGS2,RASSF4,SDC1,TNF	199 (18)
thapsigargin		chemical toxicant	Activated	4.381	bias	1.71e-10	ATF3,BIRC3,CCL3L3,CD83,CLDN4,CREB3L1,CXCL10,CXCL2,EDN1,GADD45A,GADD45B,HMGCR,ICAM1,KLF4,LBH,MET,NEDD4L,NFIL3,PPP1R15A,PRNP,SFN,SGK1,TGM2,TNF,WFS1	281 (19)
STAT4	4.783	transcription regulator	Activated	5.104	bias	1.87e-10	ARL5B,CCL2,CXCL10,CXCL2,GADD45G,HEXB,IER3,IFIH1,IFIT2,IL10,IL12RB2,IL17A,IL2RA,IRF1,IRF4,ISG15,ISG20,PRDX6,RGS16,RNF128,RRAGD,SAT1,SELENBP1,SH3BP4,SOCS3,STAT1,TBX21,TIMP1,TNF	251 (17)
JAK3		kinase		0.159		1.87e-10	CD274,CDK6,CSF3,GADD45G,IL10,IL12B,IL17A,IL2RA,IL7R,IL9,IRF1,SOCS3,TNF	234 (19)
zymosan		chemical - endogenous non-mammalian	Activated	3.667	bias	2.17e-10	CCL3L3,CCL4,CCL5,CSF1,CSF2,CSF3,CXCL2,IL10,IL12B,IL17A,IL23A,LIF,PTGS2,SOCS3,TNF	207 (13)
IKBKG		kinase	Activated	3.874	bias	2.3e-10	BIRC3,CCL5,CFLAR,CSF1,CSF2,CTSB,CTSZ,CXCL2,GBP2,ICAM1,IL1RN,ISG15,NOCT,NR6A1,PPARA,PTX3,RGS16,SGK1,SOCS3,TNF,TNFAIP2,TNFAIP3	286 (13)
ZFP36		transcription regulator	Inhibited	-3.261	bias	2.58e-10	BIRC3,CCL3L3,CSF2,CXCL2,ICAM1,IER3,IL10,IL12B,IL17A,IL23A,IRF1,OSM,PIM1,PTGS2,TFRC,THBD,TNF,Wfdc21	217 (15)
RAF1		kinase	Activated	4.422	bias	2.69e-10	CDON,CSF2,CTSL,DUSP2,DUSP4,DUSP5,HSPB1,IER3,IGFBP3,IL10,IL12B,IL23A,ITGB3,LIF,LPGAT1,MCF2L,MET,MGLL,MYBL2,PNP,PTGS2,SDC1,SELENBP1,TFPI2,TGM2,TIAM1,TIMP1,TNF	288 (21)
butaprost		chemical drug		0.862		2.81e-10	CCL3L3,CCL4,CCR7,IL10,IL17A,IL23A,NOS2,PTGS2,SOCS3,TNF	221 (18)
NFIL3	1.771	transcription regulator		0.033		2.83e-10	BATF3,GADD45A,GADD45B,ID2,IL10,IL12B,IL17A,IL9,PTGS2,SCD,TNF	233 (22)
JAK1		kinase	Activated	3.246	bias	2.84e-10	BID,CCL2,CCL3L3,CHI3L1,CSF3,ICAM1,IFIT2,IL10,IL19,IRF1,SAA1,SOCS3,STAT1,TNF,TNFRSF21	193 (14)
IL27RA	1.575	transmembrane receptor		-0.73	bias	3.15e-10	DLL4,EBI3,IL10,IL12B,IL17A,IL27,IL2RA,LTA,SOCS3,STAT1,TBX21,TNF	235 (16)
CXCL2	2	cytokine	Activated	2.382	bias	3.23e-10	CCL3L3,CCL4,CCL5,CXCL10,CXCL2,ICAM1,IFRD1,IL17A,TNF	228 (18)
VIPR1		g-protein coupled receptor	Activated	2.162	bias	3.23e-10	CCL3L3,CCL4,CCL5,CXCL10,CXCL2,IL10,IRF1,NOS2,TNF	193 (17)
sirolimus		chemical drug	Inhibited	-3.802	bias	3.93e-10	ADA,ATP1A1,ATP6AP2,ATP6V1B2,ATP6V1G1,BID,CCL3L3,CCR7,CDA,CFLAR,CSF1,CSF3,CYP3A4,DOT1L,DPP7,EBI3,ICAM1,ID2,IL10,IL12B,IL17A,IL27,IL2RA,IL7,ISG15,LGALS3,MAPK12,MRC1,NEU1,NOS2,NR3C1,PIM1,PRNP,RAB9A,RUNX2,SCD,SFN,SOCS3,STAT1,STX4,TARS,TBX21,THBD,TIMP1,TNF,TRIM25	247 (19)
F2		peptidase	Activated	5.382	bias	3.94e-10	BIRC3,CBR3,CCL2,CCL20,CCL8,CFLAR,CXCL10,DHRS9,DUSP1,ECE1,EDN1,ESM1,ICAM1,IER3,LBH,LOXL2,MFHAS1,MGLL,MYBL2,NOS2,PLA2G4A,PPIF,PTGS2,RHOB,SAMD4A,SDC4,TFPI2,THBD,TNF,TNFAIP3,UBE2S	227 (19)
EZH2	2.388	transcription regulator	Activated	2.815		4.74e-10	ABCB5,ACKR3,ATF3,BIRC3,CACNG4,CCL5,CDK6,CEMIP,CRISPLD2,CSF2,CSF3,CXCL10,CXCL2,EPAS1,EZH2,EZR,FLT3,GPR68,ICAM1,IGFBP3,IL10,IL12RB2,IL17A,IL23A,KCNK1,KLF4,PLA2G4A,PTGS2,RNF19B,SAA1,SH3BP4,SMAD3,TBX21,TNF,UBD	279 (24)
SP1		transcription regulator	Activated	4.354	bias	4.83e-10	ABCA1,ABHD2,ADA,ATF3,B4GALT5,CCL2,CCL20,CCL22,CCL5,CDK6,CHI3L1,CXCL10,EZR,HMGCR,HPSE,ICAM1,IGFBP3,IL10,IL12RB2,IRF1,IRF4,ITGAV,KLF4,LTB4R,MECP2,MET,MRC1,MYBL1,MYBL2,PIM1,PLA2G4A,PTGS2,PTPN1,PTTG1,RUNX2,SGK1,SLC39A8,SMAD3,SOAT1,STAT1,TCEAL1,TFPI2,TGM1,THBD,TIMP1,TNF,TNFAIP3,UGCG	303 (20)
methylprednisolone		chemical drug	Activated	2.188		4.96e-10	ALAS1,ATIC,ATP1A1,B4GALT6,CBLB,CCL4,CD9,Chn2,DHRS9,DUSP1,ECE1,ELOVL5,FABP5,FBP2,G0S2,GADD45A,GBP2,GDA,HSD3B7,IL10,IL17A,IL1RN,INSIG1,IRF1,ITPR1,KLF15,NR3C1,PDP2,PSAT1,PTPN1,RAB38,RUNX2,SDC1,SDC4,SDS,SERPINB9,SGK1,SH2D4A,STAT1,TFRC,TINAGL1,TNF,TOB1,TUBA1C,UGCG,USP2,YBX3	302 (20)
hyaluronic acid		chemical - endogenous mammalian	Activated	3.25	bias	5.02e-10	ACKR3,CCL3L3,CCL4,CCL5,CCR7,CD83,CTSK,CXCL10,CXCL2,ICAM1,IL10,IL12B,MET,NOS2,PTGS2,RHOC,SOCS3,TIMP1,TNF,TNFAIP3	211 (17)
IL15		cytokine	Activated	4.188	bias	5.1e-10	BAMBI,CCL2,CCL4,CCL5,CD274,CD33,CD83,CDK6,CISH,CSF1,CSF2,CSF3,CXCL10,CXCL2,DUSP5,EDN1,GPD2,GPRC5A,IL10,IL12B,IL12RB2,IL17A,IL2RA,IL7R,IL9,IRF1,LIF,LTA,NOS2,PIM1,PNP,PTPN13,RGS16,S1PR1,SMAD3,TBX21,TFRC,TIMP1,TNF,TNFRSF25,TNFSF4	243 (14)
imiquimod		chemical drug	Activated	4.007	bias	5.21e-10	CCL22,CCL4,CD274,ICAM1,IL10,IL12B,IL17A,IL19,IL1RN,IL23A,IL2RA,ISG15,ISG20,PTGS2,RSAD2,STAT1,TNF	195 (14)
Ige		complex		1.769	bias	6.24e-10	CCL2,CCL3L3,CCL4,CCL5,CSF2,CSF3,CXCL2,DUSP2,IL10,IL12B,IL17A,IL9,PTGS2,TNF	202 (18)
Nr1h		group	Inhibited	-2.39	bias	6.54e-10	ABCA1,ARG2,CCL3L3,CCL5,CCR7,CSF1,CSF2,CSF3,CXCL10,ECE1,EDN1,IFIH1,IL10,IL12B,ITPR1,MYLIP,NFKBIZ,NOS2,NPC1,PLTP,PTGS2,SCD,TNF	274 (20)
LCN2		transporter		1.425	bias	6.68e-10	CCL20,CCL22,CCL3L3,CCL4,CCL5,CXCL10,CXCL2,IL10,IL1RN,IL23A,MRC1,NOS2,RUNX2,SCD,TINAGL1,TNF	230 (20)
trinitrobenzenesulfonic acid		chemical reagent	Activated	3.91	bias	6.77e-10	CCL3L3,CCL4,CCL5,CSF3,CXCL10,CXCL2,IDO1,IL10,IL12B,IL17A,IL23A,NOS2,PTGS2,PTX3,SOCS3,TBX21,TIMP1,TNF	258 (19)
PARP1		enzyme	Activated	2.244	bias	7.77e-10	ABCA1,CCL5,CD274,CSF2,CXCL10,ECE1,GBP2,GBP6,HRH1,ICAM1,IL10,IL17A,IL18BP,IL2RA,LIF,NOS2,PTGS2,STAT1,TNF	262 (19)
hydrogen peroxide		chemical - endogenous mammalian	Activated	5.325	bias	8.57e-10	ADAM9,ATF3,BIRC3,CCL2,CCL3L3,CCL4,CFLAR,CSF1,CSF3,CTSB,DUSP1,DUSP2,DUSP4,EDN1,ENC1,EPAS1,EZR,GADD45A,GADD45B,HMGCR,ICAM1,IFIT2,IL10,IL2RA,INSIG1,ITGB3,KLF4,NFIL3,NOS2,OSGIN1,PIM1,PTGS2,PTX3,RASSF8,RNF19B,RUNX2,SGK1,TFRC,TGM2,TNF,TNFAIP3,TRAF4,TRIB3,TRPC6	274 (19)
SOCS3	1.744	phosphatase	Inhibited	-2.011	bias	9.57e-10	ABCA1,ATF3,CXCL10,ICAM1,IFIT2,IL10,IL12B,IL17A,IL1RN,IL23A,IRF1,ISG20,NOS2,SCD,SOCS3,STAT5A,TNF	235 (19)
epigallocatechin-gallate		chemical drug	Inhibited	-3.063	bias	9.63e-10	CCL2,CCL22,CCL3L3,CCL5,CFLAR,CSF2,CSF3,CTSK,CXCL10,EDN1,FADD,GADD45A,GADD45B,GJB2,ICAM1,IL10,IL12B,IL17A,IRF1,ISG15,ITGAV,ITGB3,NOS2,PTGS2,STAT1,TFRC,TIMP1,TNF	237 (16)
TNFAIP3	1.851	enzyme	Inhibited	-2.209	bias	9.8e-10	BIRC3,CCL20,CFLAR,CSF1,CSF2,CXCL10,ICAM1,IL10,IL23A,NOS2,SOCS3,TNF,TNFAIP3	237 (14)
Jnk		group	Activated	3.749	bias	1.14e-09	ABCA1,BIRC3,CCL2,CCL22,CCL4,CCL5,CCR7,CD83,CFLAR,DUSP1,EDN1,GADD45A,GDNF,ICAM1,IL10,IL12B,IL17A,IL19,IL23A,IL2RA,MRC1,NOS2,PTGS2,SOCS3,TGM2,TIMP1,TNF	206 (15)
AG490		chemical - kinase inhibitor	Inhibited	-3.949	bias	1.16e-09	BIRC3,CCL2,CCL5,EDN1,ICAM1,IL17A,IL7,IRF1,NOS2,PIM1,PTGS2,PTTG1,SAA1,SOCS3,STAT1,TIMP1,TNF	210 (17)
raloxifene		chemical drug		-0.349		1.34e-09	BCAS1,BLNK,CCL5,CSF1,CTSL,DUSP1,DUSP4,GPRC5A,IER3,ITGB3,MYBL1,PLK2,PLK3,PPP1R3C,PRSS23,PTGS2,PTTG1,SELENBP1,SMAD3,TFRC,THBD,TIMP1,TM4SF1,TNF	297 (24)
glucocorticoid		chemical drug		-0.293		1.39e-09	CCL2,CCL5,CSF1,CSF2,CSF3,CXCL2,CYP27B1,CYP3A4,DUSP1,EDN1,GLUL,ICAM1,IGFBP3,IL10,IL12B,IL17A,IL1RN,IL2RA,IL9,LTA,NOD2,NOS2,NR3C1,PPARA,PRNP,PTGS2,SGK1,SOCS3,TNF,TNFRSF18	226 (18)
mycophenolic acid		chemical drug		1.977	bias	1.41e-09	ATF3,BIRC3,CCL2,CCL20,CD274,CDK6,DUSP1,EDN1,ID2,IL17A,INHBA,MYBL1,PTGS2,RUNX2,SAMD4A,TNFAIP3,UGCG	203 (19)
KITLG		growth factor	Activated	3.888	bias	1.59e-09	ATP6V1B2,CCL2,CCL22,CCL3L3,CCL4,CISH,CSF1,CSF2,CXCL2,EFNB2,FABP5,ID2,IGFBP3,IL10,IL1RN,IL9,ITGAV,ITGB3,LAPTM5,NR3C1,OSM,PIM1,PTGS2,RNF128,SLC20A2,TNF,TNFSF4,UGCG	216 (19)
IL12B	8.433	cytokine	Activated	2.714	bias	2.34e-09	CCL5,CXCL10,DUSP5,ICAM1,IL10,IL12B,IL17A,IL23A,LTA,NOS2,SOCS3,STAT1,STAT4,TNF	204 (17)
bucladesine		chemical toxicant	Activated	3.899	bias	2.37e-09	ABCA1,CCL22,CXCL10,DUSP1,ESM1,GADD45B,GEM,GLUL,HMGCR,HS3ST1,HSD11B1,ICAM1,IGFBP3,IL10,IL17A,IL23A,IL9,LIF,NOS2,OSM,PDE10A,PTGS2,RGS16,SIGMAR1,SMAD3,SMARCA1,SOCS3,TBC1D1,THBD,TIMP1,TINAGL1,TNF,WHRN	287 (19)
MMP14		peptidase		0.608		2.42e-09	ATF3,CCL5,CSF2,CSF3,IL10,IL12B,JAG1,NR3C1,PTGS2,SDC1,SMARCA1	265 (17)
Ifnar		group	Activated	3.589	bias	2.48e-09	CCL2,CCL22,CCL5,CD274,CXCL10,GBP2,IDO1,IFIH1,IFIT2,IFIT3,IL12B,IRF1,ISG15,ISG20,RSAD2,STAT1,TNF	227 (14)
CCR5		g-protein coupled receptor		1.332	bias	2.69e-09	BID,CCL3L3,CCL4,CCL5,CD9,CXCL10,CXCL2,IL10,IL12B,IL17A,IL23A,TNF	199 (16)
MAP3K8		kinase	Activated	2.632		2.81e-09	BIRC3,CCL20,CCL4,CSF2,CSF3,CXCL2,GAB1,GNG4,GPR146,GPR160,IER3,IL10,IL12B,IL23A,INHBA,PTGS2,RAB9A,SLCO4A1,SOCS3,STAT4,TBX21,TNF	242 (16)
bortezomib		chemical drug	Inhibited	-2.647		2.86e-09	ATF3,BIRC3,CCL22,CCL4,CCL5,CFLAR,CSF2RB,CXCL10,CXCL2,GADD45A,GADD45B,ICAM1,IGFBP3,IL10,IL12B,IL17A,IL2RA,IL33,IRF4,LIF,NOS2,PPP1R15A,PTGS2,RSAD2,SAA1,SDC1,TNF,TRAF4	282 (17)
lipoteichoic acid		chemical - endogenous non-mammalian	Activated	3.391	bias	3.14e-09	CCL2,CD83,CSF3,CXCL10,EBI3,ICAM1,IL10,IL12B,IL17A,IL1RN,IL23A,NOD2,NOS2,PTGS2,TNF	206 (17)
TLR7/8		group	Activated	3.434	bias	3.69e-09	CCL2,CFLAR,EDN1,GEM,IL10,NFKBIZ,PPP1R15A,PTGS2,TNF,TNFAIP3,TNFAIP6,TRIB3	267 (15)
RNASEH2A		enzyme				3.69e-09	ACKR3,CXCL10,GBP2,IFIH1,IFIT2,IFIT3,IRF1,ISG15,ISG20,NMI,PTGS2,RSAD2
INSIG1	1.639	other	Inhibited	-4.166	bias	3.87e-09	ABCA1,ACSL4,CCL22,CCL5,CCR7,CXCL10,CXCL2,FABP5,FADS2,HMGCR,IL12B,MRC1,NFKBIZ,PLA2G4F,SCD,STAT4,STAT5A,STEAP2	188 (10)
pirinixic acid		chemical toxicant	Activated	3.795	bias	4.05e-09	ABCA1,ACSL4,ACSL5,ALAS1,CCK,CCL2,CCL5,CTSB,CYP27A1,CYP3A4,ELOVL5,FABP5,FADS2,FBP2,G0S2,GADD45A,GADD45B,GLUL,GPD2,HMGCR,HSD17B11,HSPB1,ID2,IL1RN,INSIG1,LGALS3,MET,MGLL,MYBL2,NOS2,NPC1,NPC2,PLTP,PPARA,PTGS2,SAA1,SCD,THRA,TIAM1,TNF	185 (15)
TNFRSF18	5.005	transmembrane receptor		0.963		4.23e-09	CCL2,CCL3L3,ICAM1,IDO1,IL17A,IL9,NOS2,PTGS2,TNF	229 (17)
15-deoxy-delta-12,14 -PGJ 2		chemical - endogenous non-mammalian	Inhibited	-2.628	bias	4.27e-09	ADAMTS4,BIRC3,CCL2,CCL5,CFLAR,CTSB,CXCL10,EHF,GADD45A,HSPB1,ICAM1,IL10,IRF1,KLF4,NFKBIB,NOS2,PTGES2,PTGS2,RUNX2,SOAT1,SOCS3,STAT1,TGIF1,TNF	227 (15)
benzyloxycarbonyl-Leu-Leu-Leu aldehyde		chemical - protease inhibitor		0.352	bias	4.31e-09	ATF3,ATP1A1,BIRC3,CCL2,CCL5,CFB,CFLAR,CISH,CTSB,CXCL10,CXCL2,CYP27B1,CYP3A4,DUSP1,EPAS1,EZH2,FADD,G0S2,GNAI1,HSPB1,ICAM1,IER3,MST1R,NOS2,NR3C1,PPARA,PTGS2,RUNX2,STAT1,TIMP1,TNF,YBX3	274 (17)
ATP		chemical - endogenous mammalian		0.436	bias	4.55e-09	CCL4,CCR7,CD83,CXCL10,CXCL2,DUSP1,ICAM1,IL10,IL12B,IL1RN,IL23A,IL27,IL2RA,IL33,NOS2,PTGS2,SAT1,TNF	224 (17)
MAP2K3		kinase	Activated	3.509	bias	4.81e-09	ARG2,CCL8,CTSK,CXCL10,ICAM1,IL10,IL12B,ISG15,NOS2,PPA1,PRDX6,PTGS2,SGK1,STAT1,TNF	214 (18)
Bay 11-7082		chemical - kinase inhibitor	Inhibited	-3.681	bias	4.83e-09	CCL2,CCL3L3,CCL4,CCL5,CD83,CHI3L1,CXCL2,ICAM1,IL10,IL17A,NOS2,PIM1,PTGS2,TNF	224 (18)
CEBPB		transcription regulator	Activated	4.338	bias	4.83e-09	BLNK,CCL2,CCL3L3,CCL4,CCL5,CSF3,CXCL2,CYP27B1,CYP3A4,DGAT2,EFNB2,GADD45A,HSD11B1,ICAM1,IER3,IGFBP3,IL10,IL12B,IL18BP,IL1RN,IL7,MYBL2,NFKBIZ,NOS2,NUPR1,PLA2G4A,PPARA,PPP1R15A,PTGS2,RUNX2,SAT1,SCD,SGK1,SOCS3,TM4SF1,TNF,TNFAIP6,TRIB3	272 (17)
tamoxifen		chemical drug		0.973		4.84e-09	ACKR3,BID,CDK6,CFLAR,CLIC3,CYP3A4,FADD,FADS2,G0S2,GJB2,HMGCR,IER3,IGFBP3,IL1RN,IRF1,ISG20,LIF,LTBP2,MAFF,MET,NOS2,PPARA,PRSS23,PTGS2,SCD,SDC3,SDS,SMAD3,TNF,UGCG	324 (25)
CEBPA		transcription regulator	Activated	3.31	bias	4.9e-09	ARG2,CCL20,CCL4,CHI3L1,CSF1,CSF3,CTSK,CYP3A4,DGAT2,EFNB2,EVPL,G0S2,GADD45A,GAL,HCAR3,HMGCR,HSD11B1,ICAM1,ID2,IER3,IGFBP3,IL10,IL12B,IL1RN,ISG15,MYBL2,NFIL3,PPARA,PPP1R3C,PTGS2,PTX3,RUNX2,SAA1,SCD,SOCS3,THBD,THRA,TIAM1,TNFAIP6	235 (21)
uric acid		chemical - endogenous mammalian	Activated	3.322		5.06e-09	CCL2,CCL3L3,CCL4,CCL5,CSF3,CXCL2,ICAM1,IL10,IL12B,IL17A,IL23A,ITGAV,ITGB3,NOS2,PTGS2,PTTG1,TNF	258 (18)
MIF		cytokine	Activated	3.208	bias	5.23e-09	CCL2,CCL3L3,CCL4,CXCL2,DGAT2,DUSP1,ICAM1,IL10,IL12B,IL17A,IL23A,IL2RA,IL7,IL7R,MET,NOS2,PTGS2,TIMP1,TNF	261 (19)
methotrexate		chemical drug		0.005		5.52e-09	ABCA1,ACSL4,CCL2,CCL4,CCL5,CCL8,CFB,CSF1,CXCL10,DGAT2,DUSP1,EPAS1,HSD11B1,ICAM1,IGFBP3,IL17A,ITIH4,MET,NOS2,NR3C1,PPARA,PTGS2,SCD,SDS,SOCS3,TNF,TOB1,ZBTB43	222 (19)
AIMP1		cytokine	Activated	2.771	bias	5.74e-09	CCL2,CCL4,CCL5,CXCL2,ICAM1,IL10,IL12B,TNF	262 (17)
resveratrol		chemical drug	Inhibited	-3.491		6.66e-09	ATF3,BIRC3,CCL2,CCL3L3,CCL5,CDK6,CFLAR,CTSK,CXCL10,CXCL2,ECE1,EDN1,HMGCR,ICAM1,IGFBP3,IL12B,IL17A,IL2RA,IL7R,ISG15,JAG1,MRC1,NFKBIB,NOS2,PPP1R13B,PPP1R15A,PTGS2,TFRC,TGM1,TNF,ULBP3	223 (21)
ARHGAP21		other	Activated	3.464	bias	6.75e-09	ARID5A,BATF,CXCL10,CXCL2,IFIT3,IRF1,ISG20,LTA,NFKBIZ,NMI,PTGS2,TNF
ESR1		ligand-dependent nuclear receptor	Inhibited	-2.567		6.75e-09	ABHD2,ACKR3,ADA,ATF3,ATP6V0D1,BIRC3,CCL2,CCL20,CCL4,CD83,CDC42EP2,CDK6,CLDN4,CLIC3,CPM,CRIM1,CSF2,CTSB,DUSP4,DUSP5,EDN1,EFNB2,FADD,FAM102A,GADD45B,GAL,GEM,GJB2,HMGCR,ICAM1,IER3,IFRD1,IGFBP3,IL2RA,IRF1,IRF4,ISG20,LAPTM5,LILRB5,LTB4R,MAPK12,MCF2L,MPC1,MST1R,NOS2,PDE7A,PPP1R3C,PRKX,PRSS23,PSAT1,PTGS2,PTPN13,PTTG1,PTX3,RENBP,RGS16,RND1,RSAD2,RUNX2,SCIN,SERPINB9,SGK1,SLC39A8,SMAD3,SPINT1,STAT1,STAT5A,…	330 (20)
ID2	3.179	transcription regulator		1.667		6.8e-09	BATF,CCR7,CD83,CSF1,DTX2,DUSP1,DUSP4,Foxp1,GADD45B,GADD45G,ICAM1,IL10,IL7R,IRF4,ITGB3,LTA,PTPN13,SDC1,SLAMF1,SOCS3,STAT4,TNFRSF25,TRAF4
SMAD4		transcription regulator		1.175	bias	6.91e-09	CCL2,CCL20,CSF1,EDN1,GADD45A,GADD45B,ICAM1,ID2,IER3,IL10,IL12B,IL17A,IL9,JAG1,LPAR1,MET,MST1R,PTGS2,PTX3,RUNX2,SCD,SGK1,SMAD3,TBX21,TIMP1,TNF,TNFAIP6	273 (17)
Klrk1		transmembrane receptor	Activated	2.412	bias	7.32e-09	CCL3L3,CCL4,CCL5,CSF2,IL10,TNF	244 (18)
trichostatin A		chemical drug		0.827	bias	7.32e-09	ABCA1,ADAMTS5,AGRN,CCL2,CCR7,CD9,CFLAR,CISH,CSF2,CXCL10,CYP3A4,DUSP1,EZR,GADD45A,GADD45G,HMGCR,HPSE,ICAM1,ID2,IGFBP3,IL10,IL12B,IL17A,IL2RA,IRF1,IRF4,LAT,MAMLD1,MRC1,NOS2,NPC1,OSM,PIM1,PPARA,PRNP,PRSS23,PTGS2,RASSF3,RUNX2,SAT1,SDC1,SGK1,TFPI2,TGM1,TGM2,TIMP1,TNF,TNFAIP2	293 (21)
TRADD		other	Activated	3.148	bias	8.52e-09	CCL2,CSF2,CXCL2,ICAM1,IRF1,RND1,TNF,TNFAIP2,TNFAIP3,UBD	240 (16)
FCGR2A		transmembrane receptor		1.417	bias	8.52e-09	CCL2,CCL22,CCL4,CCL5,CXCL2,IL10,IL12B,IL23A,PTGS2,TNF	204 (15)
NOD2	3.353	other	Activated	3.806	bias	8.87e-09	CCL2,CCL5,CXCL10,CXCL2,ICAM1,IER3,IL10,IL12B,IL17A,IL23A,IL27,NOS2,SOCS3,TNF,TNFAIP3	211 (17)
ITGB2		transmembrane receptor		-0.52		9.01e-09	CCL4,CSF2,CSF3,CXCL10,CXCL2,GADD45B,IL12B,PTGS2,RUNX2,TBX21,TNF,TNIP3	211 (19)
KIT		transmembrane receptor				9.92e-09	CCL2,CD164,CISH,CSF2,CSF2RB,ICAM1,IL10,IL17A,IL27,IL2RA,LGALS3,LIF,LTB4R,OSM,SOCS3,STAT1,TNF	280 (19)
IFNE		cytokine	Activated	3.162	bias	1e-08	CD83,CXCL10,HEXB,HSD11B1,IFIH1,IFIT2,IL10,ISG20,PTGS2,STAT1,STAT4	211 (15)
HIF1A		transcription regulator	Activated	3.833	bias	1.06e-08	BHLHE40,BID,CARS,CCR7,CD164,CD274,CDCP1,CEMIP,CSF1,CXCL2,DLL4,EDN1,EPAS1,GADD45B,HSPB1,ID2,IGFBP3,IL10,IL12B,IL17A,ITGAV,ITGB3,ITPR1,LOXL2,MAFF,MET,MST1R,NOS2,PPARA,PTGS2,RAB20,SDC4,SOCS3,TFRC,TMPRSS6,TNF,TNFAIP2	203 (14)
actinomycin D		chemical drug	Inhibited	-2.475	bias	1.1e-08	ABCA1,ATP1A1,BIRC3,CCK,CCL2,CFLAR,DUSP1,DUSP4,EDN1,EPAS1,FADD,GADD45A,GDA,ID2,IL7R,IRF1,LTA,LTB4R,NOS2,OSM,PTGS2,PTX3,SDC3,SOCS3,THRA,TNF,TNFAIP2	220 (19)
FABP4		transporter		0.164		1.18e-08	ABCA1,CCK,FABP5,IL12B,NOS2,PPARA,PTGS2,SOCS3,TNF	253 (21)
ZMPSTE24		peptidase				1.19e-08	ATF3,CCL22,CISH,CXCL2,GADD45A,GADD45B,GADD45G,ICAM1,IGFBP3,RGS16,SOCS3,TNF	302 (19)
ERBB2		kinase	Activated	2.726	bias	1.22e-08	ACSL4,ADAMTS5,ALAS1,ATP6AP2,BHLHE40,BIRC3,CCL2,CCL20,CCL4,CCL5,CD9,CDC42EP2,CDCP1,CDK6,CDON,CLDN4,CMAS,CSF2,CTSB,CXCL10,DLL1,EDN1,EHF,FZD4,GBP6,GNAI1,GPD2,HSD17B11,HSPB1,ID2,IGFBP3,ITGB3,JAG1,KLF4,LGALS3,LTBP2,MRC1,MXI1,MYBL1,MYBL2,NOS2,NPC2,PQLC1,PTGS2,PTPN1,RHOB,SDC1,SMAD3,SPINT1,TGIF1,TGM1,THBD,TNF,WFS1,WSB2	300 (21)
Ccl2		cytokine	Activated	3.403	bias	1.45e-08	CCL3L3,CCL4,CCL5,CSF1,CTSB,CTSK,CXCL10,CXCL2,IL10,ITGB3,KLF4,SDC4,TNF	216 (15)
FOXL2		transcription regulator	Activated	3.706	bias	1.46e-08	ATF3,BID,CCL20,CCL3L3,CPM,CXCL2,ICAM1,IER3,INHBA,LIF,MAFF,PPP1R15A,PTGS2,TNFAIP3
tributyrin		chemical drug	Activated	3.223	bias	1.46e-08	ATF3,BIRC3,CCL2,CCL20,CD274,DUSP1,EDN1,ID2,INHBA,MYBL1,PTGS2,SAMD4A,TNFAIP3,UGCG
HMOX1		enzyme		-0.931		1.55e-08	ABCA1,CCL2,CD274,CXCL10,CXCL2,GDNF,ICAM1,IL10,IL12B,IL17A,IL1RN,IL23A,ITGB3,NOS2,PECAM1,PTGS2,THBD,TNF	202 (17)
JUNB		transcription regulator		1.651	bias	1.62e-08	ATF3,CCL3L3,CD274,CFLAR,CSF2,CXCL2,DUSP1,ID2,IL10,IL12B,INHBA,ITGAV,ITGB3,LPAR1,RUNX2,SCD,SGK1,TIMP1,TNF	249 (19)
SPP1		cytokine	Activated	2.079	bias	1.64e-08	CCL2,CCL20,CCL4,CCL5,CD9,CXCL2,HMGCR,HMOX2,ICAM1,IL10,IL12B,IL17A,INSIG1,ITGAV,ITGB3,JAG1,LIF,NOS2,PTGS2,RUNX2,TIMP1,TNF,VAT1	221 (16)
ID3		transcription regulator		1.118		1.64e-08	BATF,CCR7,CD83,CSF1,DTX2,DUSP1,DUSP4,Foxp1,GADD45B,GADD45G,ICAM1,IL10,IL7R,IRF4,ITGB3,LTA,PTPN13,SEMA7A,SLAMF1,SOCS3,STAT4,TNFRSF25,TRAF4	179 (7)
SPI1		transcription regulator	Activated	3.027	bias	1.66e-08	BLNK,CCL22,CCL4,CCR7,CDK6,CHI3L1,CSF1,CSF2RB,CTSK,DCSTAMP,EPB41L2,Foxp1,ID2,IL10,IL12B,IL1RN,IL2RA,IL7R,IL9,IRF4,ISG15,KLF4,MRC1,NOS2,PTGS2,TNF	280 (18)
Akt		group	Activated	2.837	bias	1.72e-08	B4GALT5,BHLHE40,BID,CCL2,CCR7,CD274,CFLAR,CSF2,CXCL10,DLL4,EPAS1,EZH2,IER3,IL10,IL12B,IL17A,IL27,IL7R,NFIL3,NOS2,NRP2,PLA2G4A,PTGS2,PTX3,RHOB,RUNX2,SGK1,SOCS3,TNF	231 (20)
IFNA1/IFNA13		cytokine	Activated	2.599	bias	1.83e-08	CCL8,CD83,CXCL10,GEM,IFIH1,IFIT2,IRF1,ISG15,PTGS2,RSAD2,STAT1,STAT4,VEGFB	198 (17)
TIRAP		other		1.157	bias	1.84e-08	CCL4,CCL5,CXCL10,CXCL2,ICAM1,IL10,IL12B,IRF1,PTGS2,TNF	215 (17)
RPSA		translation regulator	Inhibited	-2.547	bias	1.84e-08	CCL5,CSF2,CSF3,DUSP1,DUSP2,ISG15,NOS2,PTGS2,STAT1,TNF	214 (17)
FOXO1		transcription regulator	Activated	3.14	bias	1.89e-08	ACSL5,ALAS1,BACH2,BID,BIRC3,BLNK,CCL20,CCL4,CCR7,CFLAR,CTSK,CXCL10,DCSTAMP,EDN1,ELOVL5,FABP5,GADD45A,GADD45B,GPD2,HMGCR,ICAM1,IER3,IL17A,IL7R,ITGAV,JAG1,KLF4,MXI1,NPC1,NRP2,PPP1R15A,RUNX2,SCD,SFN,SGK1,TBX21,TNF,TRIB3	243 (22)
IL17a dimer		complex	Activated	2.919	bias	1.89e-08	CCL2,CCL20,CCL4,CCL5,CSF2,CSF3,IL10,IL9,TNF	174 (10)
EGF		growth factor	Activated	4.484	bias	1.96e-08	ACSL4,ADA,ATF3,B4GALT5,CCL20,CFLAR,CISH,CXCL2,DUSP1,DUSP4,DUSP5,EDN1,EFNB2,EPAS1,EZR,GAB2,GADD45A,ICAM1,ID2,IER3,IGFBP3,IL10,IL17A,IL7R,INHBA,ITGB3,MET,NOS2,PTGS2,PTTG1,RHOB,RUNX2,SCD,SDC1,SMAD3,SOCS3,STAT1,TFPI2,TGIF1,TGM1,TGM2,TIMP1	292 (19)
TRAF6		enzyme	Activated	3.399	bias	2.31e-08	BIRC3,CCL2,CD274,CSF2,CSF3,CXCL2,ICAM1,IL10,IL12B,IL19,NOS2,TNF,TNFAIP3	214 (13)
FCER1G		transmembrane receptor		0.927		2.56e-08	CCL4,CCL5,CSF2,IDO1,IFIT2,IL10,IL12B,IL1RN,PTGS2,RSAD2,TNF	226 (19)
FSH		complex	Activated	2.26	bias	2.62e-08	ARHGAP35,CDK6,CFLAR,DUSP1,ENC1,EZR,GEM,GPRC5A,HSD11B1,IGFBP3,IL1RN,INHBA,ISG20,ITPR1,MAMLD1,NPC2,PLK2,PPARA,PRKX,PRNP,PTGS2,PTPN1,RGS16,RHOB,SGK1,SH3BP4,STAT1,STX4,TFPI2,TFRC,TIMP1,TNFAIP3,TNFAIP6,TOB1,YBX3,ZNF331	317 (20)
Fc gamma receptor		group		0.847	bias	2.64e-08	CCL22,CFLAR,ICAM1,IL10,IL12B,NOS2,SOCS3,TNF,TNFAIP3,TNIP3	217 (18)
Ap1		complex	Activated	3.788	bias	3.02e-08	ATF3,ATP6AP2,CCL2,CCL3L3,CCL4,CCL5,CSF2,EDN1,EZR,IFRD1,IGFBP3,IL10,IL12B,IL23A,IL2RA,MET,NOS2,NR3C1,PTGS2,TIMP1,TNF	231 (17)
APOE		transporter		-1.984	bias	3.38e-08	ABCA1,ADAMTS5,ATF3,CCL22,CCL3L3,CCL4,CCL5,CSF1,CTSB,CTSK,DCSTAMP,EDN1,GLUL,HMGCR,HSD11B1,ICAM1,IL10,IL12B,IL17A,IL1RN,LTBP2,MYLIP,NOS2,PTGS2,PTX3,SDC4,SOCS3,STAT4,TIAM1,TIMP1,TNF	293 (18)
PAF1		other	Activated	3.464	bias	3.4e-08	BAMBI,BIRC3,CCL3L3,CCL5,IDO1,IFIT3,ISG15,ISG20,KLF4,NFKBIZ,PNP,SDC4
MAPK14		kinase	Activated	3.385	bias	3.41e-08	ABCA1,CCL2,CCL5,CCR7,CD83,CXCL10,DLL1,DUSP1,GADD45A,HMGCR,ICAM1,IL10,IL12B,ITGB8,NOS2,PECAM1,PTGS2,SGK1,SOCS3,TBX21,TGM2,TIMP1,TNF	219 (18)
LEP		growth factor	Activated	2.601	bias	3.48e-08	ACSL5,BID,CCK,CCL2,CCL3L3,CCL5,CSF2,CSF3,CTSL,CXCL10,CYP27B1,DLL4,EDN1,ELOVL5,FADD,FADS2,FBP2,GADD45A,GAL,GDNF,HMGCR,ICAM1,IGFBP3,IL10,IL12B,IL1RN,LIF,NOS2,NR3C1,PECAM1,PPARA,PTGS2,RUNX2,SCD,SOCS3,TBX21,TIMP1,TNF	228 (20)
butyric acid		chemical - endogenous mammalian		-0.504		3.69e-08	AFF1,CCK,CCL20,CD83,CDK6,CFLAR,CSF1,CSF2,DUSP1,FRMD6,G0S2,GADD45A,GBP2,GPRC5A,ICAM1,IFIT3,IGFBP3,IL10,IL12B,IL17A,IL18BP,IL23A,IRF1,KLF4,NEU1,NOS2,PTGS2,PTPN1,SAT1,SGK1,SOCS3,TGM1,TGM2,THRA,TIMP1,TNF,TNFAIP2,VEGFB	225 (17)
IRF5		transcription regulator	Activated	3.648	bias	4e-08	CCL4,CCL5,CXCL10,CXCL2,IFIH1,IFIT2,IFIT3,IL12B,IL23A,ISG15,ISG20,RSAD2,STAT1,TNF	177 (15)
nitric oxide		chemical - endogenous mammalian		1.165	bias	4.24e-08	ATF3,CXCL10,DUSP1,ECE1,EDN1,GADD45A,IDO1,IER3,IL10,IL12B,IL12RB2,IL17A,IL7R,NOS2,NR3C1,PECAM1,PTGS2,SFN,SGK1,TFRC,TNF	256 (20)
NR1H3		ligand-dependent nuclear receptor		-0.304		4.61e-08	ABCA1,ARG2,ATF3,CCL4,CCL5,CSF3,CXCL10,HMGCR,HSD11B1,IL1RN,MYLIP,NOS2,PLTP,PTGS2,SCD,THRA,TNF	238 (19)
histamine		chemical - endogenous mammalian		1.161	bias	4.65e-08	CCL2,CCL4,CCL5,CLDN4,CSF2,CXCL10,GIF,HRH1,ICAM1,IL10,IL12B,IL9,NOS2,PTGS2,TNF	250 (21)
IL3		cytokine	Activated	4.77	bias	4.75e-08	ADA,BIRC3,CCL2,CD48,CD83,CISH,CSF1,CSF2,CSF3,CTTN,GADD45A,GADD45B,GADD45G,ICAM1,IL12B,IL2RA,IL33,ITGAV,ITGB3,LIF,LTA,OSM,PDE1B,PIM1,SEMA7A,SLAMF7,SOCS3,STAT4,TARS,TNF,TNFSF4,ZFAND5	271 (19)
CTNNB1		transcription regulator	Activated	4.571	bias	5.31e-08	AGRN,BAMBI,BHLHE40,CNTFR,COL27A1,CSF3,CTSZ,CXCL2,DGAT2,DLL4,EDN1,GADD45B,GADD45G,GDNF,GJB2,GLUL,ID2,IDO1,IL10,IL17A,IL23A,IL2RA,IL7,IL9,IRF4,LBH,LGALS3,MLLT6,NOS2,NR6A1,NRP2,NTN1,Oosp1,PMP22,PPP1R13B,PTGS2,RASSF4,RUNX2,SAA1,SCD,SFN,SGK1,SORBS3,STAT5A,TGIF1,TGM1,TGM2,TIMP1,TMEM2,TNFRSF18,UGCG,UPB1	328 (23)
IRF4	1.523	transcription regulator		-1.231	bias	5.37e-08	ADA,CCL20,CFLAR,CSF2,CXCL10,EZR,IL10,IL12B,IL17A,IL1RN,IL33,IL7R,IL9,IRF1,IRF4,ISG15,RHOB,STAT1,TBX21,TNF	239 (17)
CpG ODN 2006		chemical reagent	Activated	2.173	bias	5.49e-08	BIRC3,CCL2,CCL5,CXCL10,ICAM1,IL10,IL12B,IL17A,IL23A,IL2RA,NFKBIZ,STAT1,TNF	207 (17)
CFTR		ion channel		0.012		5.51e-08	ABCA1,BLNK,CCL5,FADS2,HSD17B11,ITPR1,NFKBIZ,NOS2,PTGS2,SAA1,SCD,SOCS3,STAT1,TNF,TNFAIP3	305 (19)
IL33	1.634	cytokine	Activated	3.507	bias	5.63e-08	ABCA1,CCL2,CCL3L3,CISH,CSF2,CXCL10,CXCL2,EPAS1,IL10,IL17A,IL9,JAG1,NOS2,TIMP1,TNF,ZC3H12A	215 (20)
ribavirin		chemical drug		1.263	bias	5.99e-08	CCL22,CCL3L3,IFIT2,IFIT3,IL10,IRF1,ISG15,RNF125,RSAD2,STAT1,TNF	236 (16)
EGFR		kinase	Activated	2.092	bias	6.42e-08	AGO2,CCL2,CCL5,CDCP1,CDK6,CHI3L1,CSF2,CTSK,CXCL10,DUSP1,DUSP4,EFNB2,GADD45A,HSPB1,ICAM1,IER3,IGFBP3,IL33,IRF1,JAG1,MET,MXI1,MYBL2,NOS2,PLA2G4A,PTGS2,RHOB,RUNX2,S100A2,SEMA7A,SOCS3,TGM2,TNF,TNFAIP6,UBE2S	284 (19)
MALP-2s		chemical reagent	Activated	2.932	bias	6.61e-08	CCL3L3,CCL4,CXCL2,CYP27B1,IL10,IL12B,PTGS2,SLAMF1,TNF	194 (17)
NfkB1-RelA		complex	Activated	2.932	bias	6.61e-08	ADAMTS4,CCL2,CCL5,CSF2,ICAM1,IL12B,NOS2,PTGS2,TNF	76 (3)
IRF8		transcription regulator	Activated	2.365	bias	6.65e-08	ATF3,CCL5,CCR7,CD83,CFB,ETV3,ICAM1,IDO1,IFIT2,IFIT3,IL12B,IL27,IRF4,ISG15,KLF4,LIF,NOS2,STAT1,TNF	201 (15)
chloroquine		chemical drug		-0.465		6.97e-08	ATP1A1,CCL5,CD83,CXCL10,DRAM1,IL12B,IL23A,PRNP,S1PR1,SOCS3,STAT4,TNF	224 (20)
lovastatin		chemical drug		1.077	bias	7.03e-08	ABCA1,ATF3,CCL2,CYP3A4,ENC1,HMGCR,IL10,IRF1,KLF4,NFKBIB,NOS2,PTGS2,RHOB,RHOC,SDC4,SMAD3,TBX21,TNF	255 (20)
FADD	1.735	other		-0.258	bias	7.68e-08	ARID5A,BIRC3,CDK6,CXCL10,CXCL2,GADD45B,ICAM1,IFIH1,IFIT2,NFIL3,PIM1,PPP1R15A,STAT1,TNF,TNFAIP3	201 (17)
CD3 group		group		0.309		7.82e-08	ACSL4,ACSL5,CBLB,GBP2,IL10,IL17A,IL27,IL2RA,PLA2G4A,SCD,TNF	250 (22)
PTPRJ		phosphatase	Activated	3.464	bias	8.75e-08	ARID5A,CCL3L3,CCL4,CXCL2,EDN1,INHBA,LTA,MET,NFKBIZ,PTGS2,TNF,ZC3H12A	198 (14)
MAPKAPK2		kinase		1.643	bias	8.75e-08	CCL2,CCL3L3,CXCL10,HSPB1,ICAM1,IL10,IL23A,LTA,NFKBIB,NOS2,STAT5A,TNF	212 (15)
prednisolone		chemical drug		-1.464	bias	9.64e-08	AGO2,BID,BIRC3,CCL2,CFLAR,CTSB,CXCL10,DRAM1,DUSP1,EDN1,FADD,GAB1,IL10,IL19,ISG20,KCTD12,NFIL3,NR3C1,PRNP,PTGS2,SGK1,STAT1,TGM2,TNF,TNFAIP3	271 (19)
IL37		cytokine	Inhibited	-2.583	bias	9.65e-08	CSF1,CSF2,CSF3,CXCL10,IL27,TIMP1,TNF	279 (16)
IFNL1		cytokine	Activated	3.568	bias	1e-07	ATF3,CCR7,CD83,CXCL10,HERC6,IFIH1,IFIT2,IFIT3,IL10,IL12B,ISG15,ISG20,RSAD2,STAT1	192 (15)
IFI16		transcription regulator	Activated	3.226	bias	1e-07	CCL2,CCL20,CCL4,CCL5,CXCL10,EDN1,GADD45A,ICAM1,ID2,IL1RN,IL7R,ISG15,PIM1,TNF	273 (18)
deferoxamine		chemical drug	Activated	4.012	bias	1.09e-07	BHLHE40,CCL20,CCL3L3,CCL4,CCR7,CFLAR,CYP3A4,DUSP1,DUSP5,EPAS1,GADD45A,GADD45B,GEM,ICAM1,IGFBP3,ISG20,LRRC25,NFIL3,NOS2,PLA2G4A,PLAGL2,RSAD2,TFRC	215 (17)
IL6R		transmembrane receptor	Activated	3.364	bias	1.19e-07	CCK,CCL2,CCL5,CXCL10,CXCL2,GAL,ICAM1,IL10,IRF1,PTGS2,SAA1,SOCS3,TIMP1,TNF	203 (16)
ZBTB16		transcription regulator		0.029		1.2e-07	BACH2,BID,CD274,CD83,CSF2,CXCL10,ID2,IL12B,IL17A,IL2RA,IL7R,ITGAV,ITGB3,LTB4R,NFKBIZ,PTGS2,RUNX2,TNF,TNFRSF25	285 (18)
IFNGR1		transmembrane receptor		1.786	bias	1.3e-07	CCL20,CCL3L3,CCL5,CXCL10,ICAM1,IDO1,IL17A,IL23A,IRF1,TBX21,TNF	208 (18)
TSLP		cytokine	Activated	2.177	bias	1.31e-07	ABCA1,CCR7,CD83,CISH,ICAM1,IL10,IL12B,IL2RA,TIMP1,TNFSF4	224 (18)
sorafenib		chemical drug	Inhibited	-2.54	bias	1.31e-07	CCL5,CDK6,CFLAR,CISH,CXCL10,IFIT2,IL2RA,PIM1,PPP1R15A,TNF	188 (15)
leukotriene D4		chemical - endogenous mammalian	Activated	3.369	bias	1.36e-07	APOLD1,ATF3,CCL2,CCL3L3,CCL4,CXCL2,DUSP1,GEM,KCNJ2,KLF4,PTGS2,TNF	223 (20)
RUNX1		transcription regulator		0	bias	1.36e-07	CHI3L1,CSF1,CSF2,CSF2RB,EPAS1,ID2,IGFBP3,IL10,IL17A,IL2RA,IL7R,ITGA9,ITGAV,ITGB3,LTB4R,MET,NFIL3,RUNX2,SLAMF1,TIMP1,TNFRSF18,UGCG	253 (23)
IL17F		cytokine	Activated	2.607	bias	1.38e-07	CCL2,CCL20,CSF2,CSF3,CXCL10,CXCL2,ICAM1,LTA,PTGS2	236 (15)
TAB1		enzyme	Inhibited	-2.985	bias	1.38e-07	BIRC3,CCL20,CCL5,CFB,CXCL10,GBP2,IFIH1,PTGS2,SAA1	176 (15)
NFATC1		transcription regulator	Activated	2.928	bias	1.45e-07	CSF2,CTSK,DCSTAMP,EDN1,ICAM1,IL10,IL12B,IL17A,IL2RA,IL33,ITGAV,ITGB3,PTGS2,TBX21,TNF	250 (18)
CD38		enzyme	Activated	3.481	bias	1.46e-07	CCL22,CISH,CSF2RB,GADD45G,GBP2,ICAM1,IL2RA,LGALS3,LRRC8C,LTA,NABP1,NFIL3,PIM1,PPP3CC,PSAT1,RBPMS,SDC1,SLC39A8,SOCS3,UPB1	245 (16)
APC		enzyme		-1.564	bias	1.49e-07	CCK,CXCL2,DHRS9,EDN1,ID2,IL10,IL17A,JAG1,KLF4,LCT,NOS2,PLA2G4A,PPARA,PTGS2,SGK1,TIAM1,TIMP1,TNF	239 (21)
GNAI3		enzyme	Activated	2.813	bias	1.53e-07	CCL2,CCL3L3,CCL4,CCL5,CCL8,CSF1,CSF2,TNF	232 (19)
IKK (complex)		complex		1.488		1.53e-07	BIRC3,CCL5,CFLAR,CXCL10,ICAM1,PTGS2,TBX21,TNF	208 (15)
hydroxypropyl-beta-cyclodextrin		chemical drug		-1.238		1.53e-07	ABCA1,CCL3L3,CTSB,GUSB,HMGCR,MYLIP,NPC1,NPC2
CpG ODN 1826		chemical reagent	Activated	3	bias	1.67e-07	CCL2,CCL22,CCL3L3,CCL4,CCL5,CCR7,CD274,CD83,CXCL10,DLL4,IL10,IL12B,NOS2,TNF	218 (18)
ADRB		group	Inhibited	-3.154	bias	1.69e-07	ADAMTS4,ARHGEF3,ATF3,BHLHE40,CDK6,CFLAR,CXCL10,CXCL2,GADD45A,HSD3B7,ICAM1,IFIT3,INSIG1,KLF4,LBH,NOS2,PTGS2,RSAD2,SLCO4A1	197 (15)
ESR2		ligand-dependent nuclear receptor		-0.812		1.73e-07	A4GALT,ABCA1,ADAMTS5,ATF3,BID,CCL2,CHST15,CLDN4,CPM,CRIM1,CSF2,EDN1,FADD,IGFBP3,IL23A,JAG1,KCNQ5,KLF4,LAPTM5,LILRB5,MEGF10,MPC1,NOS2,Oosp1,PPP1R3C,PSAT1,PTGS2,PTX3,RUNX2,SGK1,SOCS3,TGM2,TIMP1,TMEM2,TNF,TNS3	309 (19)
C3		peptidase	Activated	2.881	bias	1.78e-07	CCL2,CCL4,CCL5,CSF1,CXCL10,CXCL2,IL10,IL12B,IL17A,NOS2,SOCS3,THBD,TNF	213 (17)
RELB		transcription regulator		1.617	bias	1.78e-07	BIRC3,CCL20,CHI3L1,CSF2,IL10,IRF4,LTA,NFKBIB,NOS2,PTGS2,STAT4,TBX21,TNF	214 (16)
SMARCA4		transcription regulator	Activated	4.831	bias	1.91e-07	ABCA1,ABHD2,ACSL5,AGMAT,BAMBI,BATF,CCL2,CPM,CSF1,CTSB,CYP3A4,DHRS9,DUSP4,EHF,GADD45A,GADD45B,GADD45G,GPR68,HEXB,HS3ST1,ICAM1,IER3,IL23A,IL7R,INHBA,IRF1,ITGAV,ITPR1,KCNJ2,LGALS3,LOXL2,MAFF,MARCH1,NFKBIZ,NPC2,NRP2,PTX3,RAB38,S100A2,SEMA7A,STXBP6,TCAF2,TM4SF19,TMCC3,UBD	234 (10)
S100A6		transporter		-1.667		1.94e-07	ATF3,CCL20,CXCL2,DHRS9,HS3ST1,INHBA,PRNP,TNFAIP3,YBX3	204 (7)
NR1H2		ligand-dependent nuclear receptor		-1.246		1.96e-07	ABCA1,CCL4,CCL5,CSF3,CXCL10,HMGCR,HSD11B1,IL1RN,MRC1,NOS2,PLTP,PTGS2,SCD,THRA,TNF	241 (19)
KLRB1		transmembrane receptor		1	bias	1.97e-07	CCL3L3,CCL4,CCL5,CSF2,TNF	237 (18)
MAP2K1/2		group	Activated	2.494	bias	1.97e-07	ARG2,ATF3,CCL3L3,CCL4,CHI3L1,DUSP1,DUSP4,HSPB1,IL10,IL2RA,JAG1,NOS2,PPARA,TNF	230 (18)
NFKBIE		transcription regulator				2.02e-07	CCL2,CSF2,CSF3,ICAM1,LIF,TNF	182 (11)
IL32		cytokine		1.496	bias	2.06e-07	CCL2,CCL4,CTSK,DCSTAMP,ICAM1,IL10,IL12B,IL23A,NOS2,PTGS2,THBD,TNF	225 (18)
FN1		enzyme	Activated	3.988	bias	2.06e-07	BIRC3,CCL2,CCL4,CCL5,CD83,CDK6,CSF2,CXCL2,FERMT2,IL7,ITGAV,ITGB3,LGALS8,NOS2,RNF125,RRAGD,RUNX2,SDC1,SDC4,SOCS3,TGM2,TNF,TNFAIP2	243 (19)
SERPINE2		other				2.29e-07	CCL20,CCL22,CCL4,CCL5,CSF2,CXCL10,IL10,IL17A,LTA,TNF	228 (10)
PRL		cytokine	Activated	3.847	bias	2.5e-07	CAMK2N1,CCL2,CISH,CTSA,CTSB,CXCL10,HERC6,ID2,IFIH1,IFIT3,IGFBP3,IL2RA,IRF1,ISG15,MLKL,NOS2,NUPR1,PIM1,PKIG,RSAD2,SDC1,SOCS3,STAT1,STAT5A,TIMP1,TNF,TRIM25	199 (17)
mir-29		microrna	Inhibited	-3.38	bias	2.55e-07	CCL8,CDK6,FLT3,IDO1,IL12B,IL23A,IL2RA,MYBL2,PMP22,RUNX2,TBX21,TNFAIP3,TRAF4	183 (9)
KCNE3		ion channel				2.55e-07	APOLD1,CISH,FABP5,IRF4,KCNJ2,KLF4,NFIL3,OSGIN1,PLK3,PTGS2,STAT4,TMEM120B,TNFAIP6
dextran sulfate		chemical drug	Activated	2.156	bias	2.6e-07	ADA,CCL3L3,CCL5,CD83,CSF2,CSF3,CXCL2,EFNB2,ICAM1,IDO1,IL10,IL17A,IL23A,IL36G,ISG15,MRC1,NOS2,PECAM1,PTGS2,S1PR1,SOCS3,TGM2,TNF,UBD,VEGFB	215 (13)
Pam3-Cys		chemical toxicant	Activated	3.257	bias	2.65e-07	CCL2,CCL5,CD83,CXCL10,CXCL2,IL10,IL12B,IL1RN,IL2RA,NOS2,TNF	195 (14)
galactosylceramide-alpha		chemical reagent	Activated	3.217	bias	2.65e-07	CCL2,CSF2,EBI3,IL10,IL12RB2,IL17A,IRF1,LGALS3,NOS2,RNF128,TNF	223 (20)
IL25		cytokine		1.237	bias	2.65e-07	CCL2,CCL5,CSF3,IL10,IL12B,IL17A,IL23A,IL33,IL9,JAG1,TNF	235 (21)
KRT17		other	Activated	2.333	bias	2.7e-07	CCL22,CCL3L3,CCL4,CCL5,CSF3,CXCL10,CXCL2,IL10,TNF
pyrrolidine dithiocarbamate		chemical reagent	Inhibited	-3.005	bias	2.71e-07	BIRC3,CCL2,CCL5,CXCL10,CXCL2,ICAM1,IDO1,IL10,IL9,IRF1,MST1R,NOS2,PECAM1,PPARA,PTGS2,TNF	199 (15)
TGFA		growth factor		1.06	bias	2.72e-07	BIRC3,CCL2,CCL20,CCL5,CSF2,CXCL10,CXCL2,GJB2,ICAM1,PECAM1,PLA2G4A,PRNP,PTGS2,PTTG1	259 (19)
FGF2		growth factor	Activated	4.005	bias	2.8e-07	ADAMTS5,AGAP3,CCK,CCL2,CCL20,CFLAR,CSF1,CSF3,CTSK,CTSL,CXCL2,DLL1,DLL4,EFNB2,EPAS1,GADD45A,GDNF,HPSE,ICAM1,IGFBP3,INHBA,MET,NOS2,NR3C1,PTGS2,PTTG1,RUNX2,SCD,SDC1,SOCS3,TIMP1,TNF	265 (20)
RORA		ligand-dependent nuclear receptor		1.211	bias	2.87e-07	ABCA1,ACSL4,CCL3L3,CCL4,CCL5,CISH,CXCL10,CYP27A1,GADD45B,HMGCR,IL10,IL17A,ITPR1,NOCT,PPP1R3C,PRDX6,PTGS2,SCD,SELENBP1,SLC15A4,SOCS3,TNF	238 (17)
PRKCA		kinase	Activated	2.53	bias	2.95e-07	CCL2,CSF2,CSF3,CTSB,CXCL2,ICAM1,ID2,IFIT3,IGFBP3,IL12B,IL17A,INSIG1,NOS2,PTGS2,RSAD2,RUNX2,TNF	194 (16)
SCARB1		transporter		0.167		3e-07	CCL2,CCL5,CXCL2,HMGCR,IL10,IL1RN,LTA,NOS2,PTGS2,TNF	227 (18)
CGS 21680		chemical reagent	Inhibited	-2.203	bias	3e-07	CCL22,CCL3L3,CCL4,CCL5,IL10,IL12B,NOS2,PTGS2,TFRC,TNF	218 (16)
MEOX2		transcription regulator	Inhibited	-3.081	bias	3e-07	CCL2,CCL20,CXCL2,EDN1,ICAM1,ITGAV,ITGB3,PTX3,TNFAIP3,TNFSF4	286 (17)
BCL10		transcription regulator	Activated	2.381	bias	3.04e-07	CCL4,CCL5,CSF2,CXCL2,IL2RA,TNF,TNFAIP3	182 (15)
IL36G	5.159	cytokine				3.04e-07	CCL20,CD83,CXCL10,IL12B,IL17A,IL23A,TNF	211 (15)
RIPK2		kinase	Activated	2.256	bias	3.04e-07	ABCA1,CCL5,CXCL10,CXCL2,DGAT2,HMGCR,ICAM1,IL17A,IL33,NOS2,PPARA,SCD,TNF	209 (17)
MAVS		other	Activated	2.738	bias	3.08e-07	CCL5,CXCL10,CXCL2,IFIT2,IFIT3,IL12B,ISG15,ISG20,RSAD2,SOCS3,STAT1,TNF	204 (18)
IL1R1		transmembrane receptor		1.975	bias	3.08e-07	CCL3L3,CCL5,CXCL10,CXCL2,ICAM1,IL10,IL17A,NOS2,PTGS2,SAA1,TIMP1,TNF	228 (16)
carbon monoxide		chemical - endogenous mammalian		-1.486	bias	3.08e-07	CCL2,CCL4,CFLAR,CSF2,FADD,GDNF,ICAM1,IL10,IL12B,NOS2,PTGS2,TNF	212 (19)
TGM2	3.191	enzyme	Activated	3.576	bias	3.15e-07	ADGRE3,BIRC3,CCL2,CCL22,CDK6,CFLAR,CSF3,CXCL10,DCSTAMP,IFIT2,IFIT3,ITGB3,KCNQ5,LRRC25,MS4A3,NPC2,OLFM4,PIM1,RUNX2,SEMA7A,SLAMF7,STAT1,TNF,TNFAIP2	192 (15)
TRAF2		enzyme		1.098		3.19e-07	BIRC3,CCL2,CCL5,CFLAR,CSF2,CXCL10,EBI3,ICAM1,IL17A,IRF4,NOS2,PRNP,TNF,TNFAIP3	173 (12)
CDKN2A		transcription regulator		-0.271		3.27e-07	CCL2,CCL22,CCL3L3,CCL4,CCL5,CCR7,CXCL10,DUSP1,EZH2,FBL,GADD45G,GPRC5A,HUNK,ITGAV,ITGB3,KCNK1,LGALS3,LTA,MRC1,MYBL2,NR3C1,PTGS2,PTX3,RAB9A,TCF19,TGIF1,TNF,TOB1	316 (23)
NfkB-RelA		complex	Activated	2.807	bias	3.48e-07	CCL2,CCL5,CSF2,ICAM1,IL10,NOS2,PTGS2,TNF
SATB1		transcription regulator		-1.116		3.68e-07	BLNK,CSF2,DUSP4,EBI3,EPAS1,FAM129A,FERMT2,Foxp1,GADD45B,GNG4,IL2RA,IL7,IL7R,P2RY8,PTGS2,S1PR1,SGK1,SMAD3,TMEM2,TNF	134 (7)
NCF1		enzyme		1.969	bias	3.69e-07	CCL4,CCL5,CXCL10,ICAM1,IL10,IL12RB2,IL17A,THBD,TNF	186 (16)
IL23		complex	Activated	2.447	bias	3.88e-07	CCL20,CSF2,IL10,IL12B,IL17A,IL2RA,IL9,IRF4,TBX21,TNF	240 (16)
S100A9		other	Activated	3.146	bias	4.06e-07	ADAMTS4,ADAMTS5,ATF3,BHLHE40,CD274,CPM,CSF2RB,CXCL10,GJB2,GPRC5A,ICAM1,IL33,ISG15,KLF15,MCF2L,NOS2,PLK3,RAB20,SGK1,TNF	254 (22)
JAK2		kinase	Activated	3.653	bias	4.23e-07	CCL2,CCL5,CFLAR,CSF2,CXCL10,GBP2,ICAM1,IL17A,IL19,IRF1,NOS2,OSM,PECAM1,PTGS2,SOCS3,STAT1,TNF	203 (18)
WNT5A		cytokine		-0.566		4.23e-07	CCK,CCL2,CCL3L3,CSF3,CXCL2,DLL1,ID2,IL10,IL12B,IRF1,NOS2,PTGS2,RUNX2,SDC1,SOCS3,STAT1,TNF	203 (19)
C5AR2		g-protein coupled receptor		-1.706	bias	4.33e-07	CSF3,CXCL2,IL10,IL12B,IL17A,TNF	236 (15)
TP73		transcription regulator	Activated	2.024	bias	4.43e-07	ADA,ATF3,BHLHE40,BID,CCL2,CD83,CDC42EP2,CNTFR,CXCL2,DRAM1,GAB2,GADD45A,ID2,IER3,IGFBP3,IL7,JAG1,KCNK1,LBH,NUPR1,PLK2,PMP22,RIPOR3,S100A2,SAT1,SFN,SPINT1,TCEAL1,TIMP1,TNFAIP2	258 (13)
aspirin		chemical drug	Inhibited	-2.356	bias	4.62e-07	ABCA1,CCL2,CCL4,CSF1,CSF2,CSF3,CXCL10,ICAM1,IDO1,IL12B,NOS2,PLA2G4A,PPARA,PTGS2,TNF	207 (17)
TRIM24		transcription regulator	Inhibited	-3.337	bias	4.62e-07	AGRN,BLNK,CXCL10,GBP2,GLUL,HERC6,IFIH1,IFIT2,IFIT3,IRF1,ISG15,LGALS3,MOV10,NMI,STAT1	158 (7)
AGT		growth factor	Activated	3.195	bias	4.68e-07	ADAMTS5,ATF3,ATP1A1,CCL2,CCL3L3,CCL4,CCL5,CCL8,CCR7,CXCL10,CXCL2,DLL4,DUSP1,EDN1,EFNB2,HMGCR,HSPB1,ICAM1,IGFBP3,ITGAV,ITGB3,JAG1,LIF,LTA,NOS2,PPP1R3C,PTGS2,SGK1,SOCS3,SPTSSA,TFRC,THBD,TIMP1,TLN2,TNF,UGCG	211 (18)
Ras		group	Activated	2.145	bias	4.76e-07	ARG2,B4GALT5,CCK,CCL2,CD274,CDK6,CLDN4,CXCL10,EDN1,LIF,MET,NOS2,PTGS2,STAT1,TFPI2,TGM2,TNF	281 (21)
MAPK9		kinase	Activated	2.63	bias	4.92e-07	BIRC3,CCL2,EDN1,GADD45B,IL12B,IL12RB2,ISG20,LIF,LTA,NMI,NOS2,PLA2G4A,PPARA,PPP1R15A,PTX3,SCD,THRA,TNF,TNFAIP3	244 (20)
D-galactosamine		chemical - endogenous mammalian	Activated	3.064	bias	4.99e-07	CTSB,CXCL10,CXCL2,ICAM1,IL10,IL12B,NOS2,SDC3,TIMP1,TNF	218 (18)
IRF6		transcription regulator	Activated	2.289	bias	4.99e-07	ADAMTS5,CCL2,CD9,IL10,IL12B,IL17A,IL23A,KLF4,NOS2,PTGS2	203 (16)
IL-17f dimer		complex	Activated	2.63	bias	5.02e-07	CCL2,CCL4,CCL5,CSF2,CSF3,IL10,IL9	108 (4)
2,4-dinitrofluorobenzene		chemical toxicant	Activated	2.207	bias	5.02e-07	CXCL10,CXCL2,ICAM1,IL10,IL17A,PPARA,TNF	291 (13)
PTPN22		phosphatase		-1.257	bias	5.07e-07	IL10,IL23A,IRF4,ISG15,MRC1,NOS2,TNF,TNFRSF18	207 (15)
cigarette smoke		chemical toxicant	Activated	2.307	bias	5.1e-07	ABCA1,CCL2,CCL3L3,CCL4,CRLF2,CSF2,CXCL10,CXCL2,EPAS1,FABP5,GADD45G,ICAM1,IL10,KLF4,MAFF,NOS2,NR3C1,P2RY6,PTGS2,PTPN1,STAT1,TIMP1,TNF,VEGFB	219 (18)
Ifn gamma		complex	Activated	3.518	bias	5.3e-07	CCL2,CCL5,CHI3L1,CXCL10,EDN1,ICAM1,IL10,IL18BP,IL33,LIF,NOS2,NR3C1,SOCS3,STAT1,TNF	223 (21)
arachidonic acid		chemical - endogenous mammalian		-1.791		5.3e-07	ABCA1,ACSL4,CD83,EDN1,FADS2,IL12B,IL17A,MRC1,PECAM1,PLA2G4A,PLTP,PTGS2,SCD,SOAT1,TNF	226 (21)
ATF4		transcription regulator	Activated	3.895	bias	5.45e-07	ABCA1,ATF3,CARS,CCL2,CYP27A1,EDN1,GADD45A,JAG1,KLF4,LGALS3,NUPR1,PMP22,PPP1R15A,PSAT1,PTGS2,PTX3,SIGMAR1,TRIB3,WFS1
cyclophosphamide		chemical drug	Activated	2.758	bias	5.97e-07	ATF3,CYP3A4,FADD,FLT3,IER3,IL10,IL12B,LGALS3,NOS2,TGIF1,TIMP1,TNF,UGCG	285 (21)
TNFSF10		cytokine	Activated	2.292		6.06e-07	BID,BIRC3,CFLAR,CTSB,FADD,IL1RN,IL2RA,ISG15,PTGS2,STAT1,TFRC,TIMP1,TNF,TNFAIP2,TNFAIP3	244 (13)
decitabine		chemical drug	Activated	5.203	bias	6.13e-07	AGRN,BIRC3,CCL5,CCR7,CD9,CDA,CHI3L1,CXCL10,CYP3A4,DUSP1,EHF,GADD45B,GADD45G,HPSE,IFIT2,IGFBP3,IL7R,ISG15,ITGAV,JAG1,KLF4,LGALS3,MECP2,NOS2,NR3C1,PTGS2,RASSF3,S100A2,SAT1,SFN,SGK1,SOCS3,STAT1,STAT4,TFPI2,TFRC,THBD,TNF,TNFRSF25	287 (22)
mifepristone		chemical drug		-0.684		6.75e-07	ALAS1,ATF3,CCL2,CHI3L1,CISH,CSF2,CYP3A4,DUSP1,EFNB2,GAL,HSD11B1,ICAM1,IGFBP3,IL10,IL12B,ITGB3,KLF4,NR3C1,PLA2G4A,PLK2,PTGS2,RHOB,RHOC,RUNX2,STAT5A,TNF,TNFAIP6	276 (19)
CCL2	4.865	cytokine		0.938	bias	7.01e-07	ABCA1,CCL2,CCL5,CXCL10,ICAM1,IL10,IL12B,IL23A,INHBA,PTGS2,RNF128,TIMP1,TNF	199 (16)
SAA1	2.011	transporter	Activated	2.791	bias	7.25e-07	CCL3L3,CCL4,CXCL10,IL10,IL12B,IL1RN,MRC1,TNF	226 (18)
PF4		cytokine	Activated	2.784	bias	7.25e-07	CCL2,CCL22,CCL4,CPM,ICAM1,IL19,KLF4,TNF	190 (17)
NODAL		growth factor		-0.707		7.25e-07	CCL5,CCR7,CXCL10,IL10,IL12B,MRC1,NOS2,TNF	278 (22)
JAK inhibitor I		chemical - kinase inhibitor	Inhibited	-2.121	bias	7.25e-07	CXCL10,CXCL2,IL17A,IL19,NOS2,PTGS2,SGK1,TIMP1	197 (17)
CSF1	2.121	cytokine	Activated	3.36	bias	7.46e-07	CCL2,CCL5,CPM,CSF1,CTSK,CXCL2,DUSP1,DUSP5,ETV3,GPR68,IL10,IL12B,IL18BP,IL23A,IRF4,ITGAV,ITGB3,MRC1,STAT1,TNF,TNFAIP3	254 (17)
S-(2,3-bispalmitoyloxypropyl)-cysteine-GDPKHPKSF		chemical reagent	Activated	2.611	bias	7.99e-07	CCL2,CCL4,CCL5,CXCL10,ICAM1,PTGS2,TNF	202 (16)
cuprizone		chemical toxicant	Activated	2.608	bias	7.99e-07	CCL3L3,CCL4,CCL5,CXCL10,S1PR1,SOCS3,TNF
ssRNA40		chemical reagent	Activated	2.414	bias	7.99e-07	CD83,EBI3,IL10,IL12B,IL23A,IL27,TNF	188 (16)
RPS6KA5		kinase		0.828	bias	7.99e-07	CCL20,CCR7,DUSP1,IL10,IL12B,PTGS2,TNF	265 (20)
TREM2		transmembrane receptor		-1.276		7.99e-07	CCL3L3,CCR7,CXCL2,NOS2,PTGS2,TNF,TNFAIP3	220 (18)
IL36A		cytokine				7.99e-07	CCL20,CSF2,CXCL10,IL12B,IL17A,IL23A,TNF	215 (16)
SPHK1		kinase		0.255	bias	8.05e-07	BIRC3,CCL22,CCL5,CTTN,IL10,IL33,PTGS2,SOCS3,TIMP1,TNF	263 (20)
BAPTA-AM		chemical reagent		-1.943	bias	8.05e-07	ATF3,CCK,CCL2,CISH,CXCL10,GDNF,ICAM1,PTGS2,SOCS3,TNF	191 (16)
mir-21		microrna	Inhibited	-3.747	bias	8.76e-07	CCL2,CCL3L3,CD274,CDK6,CXCL10,GBP2,GBP5,GBP6,ICAM1,IDO1,IL12RB2,IL36G,IRF1,JAG1,PECAM1,PPA1,PPARA,RHOB,SLAMF1,STAT1,TBC1D1,TBX21,TGM1,TIAM1,TNF	269 (19)
MARK2		kinase	Activated	3	bias	8.82e-07	BATF,CXCL2,IL12B,IRF1,LTA,NFKBIZ,PTGS2,RSAD2,TNF	232 (10)
SELP		transmembrane receptor		1.706	bias	8.82e-07	CCL2,CCL3L3,CCL4,CSF2,CXCL2,HCAR3,SERPINB9,THBD,TNF	295 (16)
N-nitro-L-arginine methyl ester		chemical drug		1.218		8.99e-07	ATF3,CCL2,CD83,CSF1,CXCL2,HMGCR,ICAM1,IL12B,ITGAV,ITGB3,NOS2,PTGS2,TIMP1,TNF	214 (16)
CCL11		cytokine	Activated	2.72	bias	9.43e-07	CCL2,CCL3L3,CCL4,CCL8,CXCL2,HCAR3,ICAM1,IL9,TNF,TNFSF4,VEGFB	234 (17)
adenosine		chemical - endogenous mammalian		0.79		9.43e-07	BID,CCL5,ICAM1,IL10,IL12B,IL2RA,NR3C1,PTGS2,SOCS3,TIMP1,TNF	223 (21)
SREBF1		transcription regulator	Activated	2.931	bias	9.59e-07	ABCA1,ACSL4,ACSL5,AGMAT,BHLHE40,CXCL10,CYP27B1,FABP5,FADS2,HMGCR,IL10,INSIG1,LGALS3,NFIL3,NOS2,NPC1,PLTP,PTGIR,PTGS2,SCD,SORBS3,TNF	252 (21)
indomethacin		chemical drug		1.952	bias	1.02e-06	ADAMTS5,BIRC3,CCL2,CCL3L3,CLDN4,CSF2RB,IDO1,IER3,IL10,IL17A,LGALS3,LOXL2,MRC1,NOS2,PIM1,PLA2G4A,PPARA,PTGS2,SDC1,TFPI2,TGIF1,TIMP1,TNF,TNFRSF21	285 (18)
BRCA1		transcription regulator	Activated	2.376	bias	1.04e-06	CCL5,CYP3A4,EZR,GADD45A,GADD45B,GTF2H1,HSPB1,IFIT2,IFIT3,NR3C1,PLTP,S100A2,SAT1,SFN,SMAD3,STAT1,STAT5A,TNF,TNFAIP2,TNFRSF18	287 (20)
trans-hydroxytamoxifen		chemical drug	Inhibited	-2		1.07e-06	BCAS1,BLNK,CTSL,DUSP1,DUSP4,ENC1,GPRC5A,IER3,MYBL1,PLK2,PPP1R3C,PRSS23,SELENBP1,SERPINB9,SMAD3,TM4SF1	227 (7)
CCR2		g-protein coupled receptor		-0.198	bias	1.1e-06	CCL2,CCL22,CCL3L3,CCL4,CCL5,CSF2,CXCL10,CXCL2,IL10,IL17A,TIMP1,TNF	221 (20)
MMP9		peptidase		0.64	bias	1.12e-06	CCL22,CCL3L3,CTSB,CTSK,CXCL2,GADD45A,ICAM1,IL10,IL23A,JAG1,SDC4,TIMP1,TNF	247 (17)
oblimersen		biologic drug	Activated	3.317	bias	1.15e-06	ATF3,DUSP1,EFNB2,GADD45A,GADD45B,IFIT3,IFRD1,ISG15,MAFF,RSAD2,STAT1
alefacept		biologic drug	Inhibited	-2.82	bias	1.15e-06	CBLB,CCL5,HOPX,IL12B,IL23A,IL2RA,IL7R,NOS2,SOCS3,STAT1,STAT4	92 (7)
NUPR1	3.28	transcription regulator	Activated	2.137	bias	1.15e-06	AGRN,ATF3,ATP8B1,C3orf62,CAMK2N1,DUSP5,FAM111B,GAB2,GADD45A,GBP2,IFIT2,KLF4,LIF,MGLL,NFIL3,NT5DC3,NUPR1,OSER1,PIM1,PLK3,PMP22,PPP1R15A,PRNP,RAB20,RAB38,RNF19B,RUSC2,SAMD4A,SAT1,SIGMAR1,SLC39A8,SPTSSA,TCAF2,TMEM158,TNS3,TOB1,TRIB3,UPRT
GAPDH		enzyme		-0.092	bias	1.15e-06	CCL2,CCL20,CCL4,DUSP1,GEM,IFIT2,IL10,NUB1,STAT1	162 (7)
SU6656		chemical toxicant	Inhibited	-2.975	bias	1.15e-06	ATF3,CSF1,GDNF,GFPT2,IER3,INHBA,NFIL3,PTGS2,SOCS3	268 (24)
mir-155		microrna		-1.258	bias	1.16e-06	CCL2,CCL5,CSF3,CXCL10,DUSP5,FADD,IL10,IL12B,IL17A,NOS2,PELI1,PTGS2,S1PR1,SOCS3,TNF	221 (20)
ATF2		transcription regulator	Activated	2.962	bias	1.19e-06	ATF3,DUSP1,DUSP5,GADD45A,IL10,IL23A,ITGB8,MEIS2,NOS2,NUPR1,PLA2G4A,PTGS2,RHOB,TNF	281 (20)
docosahexaenoic acid		chemical drug		-1.043	bias	1.19e-06	ABCA1,BID,CSF1,FADS2,GDNF,IL10,IL17A,LOXL2,LOXL3,MRC1,NOS2,PLTP,PPARA,PTGS2,SCD,SDC1,SOCS3,TIMP1,TNF	227 (19)
cholecalciferol		chemical - endogenous mammalian	Activated	2.36	bias	1.2e-06	CCL2,CCL5,CD83,CDA,CSF1,CTSK,CTSL,CXCL10,EDN1,IGFBP3,IL10,IL12B,LRRC25,PRKX,RUNX2,TNF	232 (20)
ADORA3		g-protein coupled receptor	Activated	2.646	bias	1.23e-06	CCL2,CCL4,CCL5,CCL8,CSF1,CSF2,IL10	249 (20)
MSR1		transmembrane receptor		0.89		1.23e-06	CCL5,CXCL10,CXCL2,IL10,ISG15,NOS2,TNF	235 (16)
CEP-1347		chemical drug	Inhibited	-2.607	bias	1.23e-06	CCL3L3,CCL4,CCL5,CSF2,NOS2,PTGS2,TNF	209 (17)
PS-1145		chemical - kinase inhibitor	Inhibited	-2.611	bias	1.23e-06	CCL2,CCL5,EBI3,ICAM1,IRF1,PTGS2,TNFAIP3	218 (16)
HRAS		enzyme		0.47	bias	1.24e-06	CCL5,CDON,CFB,CISH,CSF1,CSF2,CTSB,CTSZ,CXCL10,DLL1,DUSP1,FERMT2,FRMD6,GADD45G,GJB2,GUSB,HSPB1,ICAM1,ID2,IL7R,ITGAV,MAPK12,MET,NOS2,OSM,PLA2G4A,PLTP,PRDX6,PRNP,PRSS23,PTGS2,RHOB,RNF19B,SERPINB9,SMAD3,SOAT1,SOCS3,TGM2,TINAGL1,TNF,TRPC6,WSB2	287 (21)
IL24		cytokine	Activated	2.073	bias	1.26e-06	FADD,GADD45A,GADD45G,IL10,IL12B,IL23A,IL27,IRF4,PPP1R15A,PTGS2	279 (18)
VIP		other	Inhibited	-2.293		1.31e-06	CCL2,CCL3L3,CCL4,CCL5,CD274,CXCL10,CXCL2,IL10,IL12B,IL17A,IL2RA,IRF1,NOS2,PTGS2,TNF	191 (15)
TO-901317		chemical reagent		0.864	bias	1.36e-06	ABCA1,ACSL5,ALAS1,ARG2,CCL2,ELOVL5,FABP5,FADS2,HSD11B1,HSD17B11,ITIH4,LGALS3,MGLL,NOS2,PLTP,PTGS2,SCD,SIGMAR1,SMAD3,TGM2,THRA,TIMP1,TNF	219 (17)
gentamicin		chemical drug	Activated	2.801		1.37e-06	ATF3,ATIC,CCL2,CD9,CXCL10,EAF1,GADD45A,GJB2,HSPB1,ICAM1,IFRD1,IGFBP3,IL10,IRF1,NOS2,PSAT1,PTPN1,TARS,TFRC,TIMP1,TNF,UPB1,VAT1,YBX3	216 (16)
ECSIT		transcription regulator	Activated	2.813	bias	1.41e-06	CD83,CFLAR,IER3,IL1RN,PIM1,PTGS2,STAT5A,TNFAIP3	198 (14)
hemozoin		chemical - endogenous non-mammalian	Activated	2.72	bias	1.41e-06	CCL2,CCL3L3,CCL4,CD83,ICAM1,IL10,NOS2,TNF	216 (17)
CD47		transmembrane receptor		1.741	bias	1.41e-06	CSF1,CTSK,DCSTAMP,IL10,IL12RB2,IL7,NOS2,TNF	247 (15)
CASP1		peptidase		1.51	bias	1.49e-06	CSF2,CSF3,CXCL2,MLKL,NOS2,PPARA,PTGS2,SCD,TNF	230 (22)
mevalonic acid		chemical - endogenous mammalian		1.03		1.49e-06	ABCA1,CCL2,GNAI1,HMGCR,ICAM1,PPARA,PTGS2,SMAD3,TNF	285 (22)
NR4A2		ligand-dependent nuclear receptor		-0.354	bias	1.51e-06	CCL20,CCR7,CFLAR,IL10,IL17A,IL23A,IL2RA,NOS2,PTGS2,PTX3,SLC39A8,SMAD3,TNF	285 (18)
palmitoleic acid		chemical - endogenous mammalian		-0.946		1.52e-06	ABCA1,CXCL2,IL10,MRC1,NOS2,TNF	238 (19)
trovafloxacin		chemical drug	Activated	3.464	bias	1.54e-06	BHLHE40,BIRC3,CSF2,CXCL2,ICAM1,IRF1,ISG20,NEDD4L,SOCS3,TGIF1,TGM2,TNFAIP3	278 (12)
Mek		group	Activated	2.074	bias	1.55e-06	B4GALT6,BID,CDCP1,CXCL10,DUSP4,DUSP5,EPAS1,GDA,HRH1,HSPB1,ID2,IER3,IL10,IL12B,ITGB3,MAFF,MST1R,OSBPL8,OSM,PTGS2,TNF,TNFAIP3	273 (22)
SQSTM1		transcription regulator		1.056	bias	1.57e-06	ARID5A,CXCL2,EDN1,IL12B,IRF1,LTA,NOS2,PLK2,RSAD2,TNF	187 (13)
TSC22D3		transcription regulator		-0.173	bias	1.57e-06	CCL2,CCL5,DUSP1,ICAM1,IL10,IL2RA,PTGS2,RUNX2,SGK1,TNF	211 (17)
hydrocortisone		chemical - endogenous mammalian		0.374		1.6e-06	CCL2,CYP3A4,EZR,GADD45B,GLUL,HSD11B1,ICAM1,IGFBP3,IL10,IL2RA,INHBA,NR3C1,PLA2G4A,PTGS2,STAT5A,TNFAIP2,TNFAIP3	296 (20)
GPR84		g-protein coupled receptor	Activated	2.236	bias	1.74e-06	CCL3L3,IL12B,NOS2,PTGES2,TNF	212 (11)
CD244		transmembrane receptor	Activated	2.219	bias	1.74e-06	CCL3L3,CCL4,CCL5,CSF2,TNF	272 (19)
PDLIM2		other		0		1.77e-06	CCL20,CEMIP,CRISPLD2,CSF2,IFIT3,IGFBP3,IL7,KCTD12,PRUNE2,RNF128,SLC22A3,STAT1,STAT4,ZNF300	202 (13)
Sb202190		chemical - kinase inhibitor	Inhibited	-3.883	bias	1.88e-06	CCL2,CSF2,CXCL10,EBI3,IL10,IL12B,IL23A,IL27,NOS2,PLA2G4A,PPARA,PTGS2,RHOB,SGK1,TGM1,TNF	257 (23)
3M-001		chemical drug	Activated	2.959	bias	1.92e-06	CCL2,CCL4,CD83,CXCL10,IL12B,ISG15,PTGS2,STAT1,TNF	124 (7)
IRF9		transcription regulator		0.851		1.92e-06	CXCL10,IFIT2,IFIT3,IL27,IRF1,ISG15,SOCS3,STAT1,TNF	175 (11)
TANK		other		-0.563		1.92e-06	CXCL2,IL12B,IL23A,LTA,NFKBIZ,NOS2,PTGS2,TNF,ZC3H12A	171 (13)
ACKR2		g-protein coupled receptor	Inhibited	-3	bias	1.92e-06	CCL5,CXCL10,IFIT2,IFIT3,IL17A,ISG15,ISG20,RSAD2,STAT1	173 (7)
C3AR1		g-protein coupled receptor		-0.186	bias	1.94e-06	CCL3L3,CCL4,CCL5,CSF3,CXCL10,IL10,IL17A,IL23A,LTBP2,TNF	268 (18)
CREM		transcription regulator		0.553		1.97e-06	ABCA1,APOLD1,ATF3,BHLHE40,CSF2,DUSP1,DUSP4,FRMD6,GADD45B,GPD2,HMGCR,IL17A,NFIL3,NOS2,NPC2,PPP1R15A,RHOB,TNF	301 (23)
H89		chemical - kinase inhibitor	Inhibited	-2.552	bias	1.97e-06	ABCA1,CCL5,CD83,CYP27B1,DUSP1,GDNF,IL10,IL23A,NFIL3,NOS2,PLA2G4A,PTGS2,SDC1,SIGMAR1,SMAD3,TNF,TNFAIP6	213 (17)
MAP2K4		kinase	Activated	3.271	bias	2e-06	ATF3,BIRC3,CCL5,CFLAR,CXCL10,GADD45A,IL12B,NOS2,PLA2G4A,PTGS2,TNF	221 (23)
troglitazone		chemical drug		0.056		2e-06	ABCA1,ABHD2,ALAS1,ATF3,BIRC3,C9orf72,CARS,CCL2,CCL5,CFLAR,CXCL10,CYP3A4,FABP5,FADS2,G0S2,GADD45A,GBP2,HUNK,ICAM1,IFRD1,KLF4,NOS2,PNPLA8,PPARA,PTGS2,SCD,SDC1,TGIF1,TNF,TRIB3,TST	246 (19)
EGR1		transcription regulator	Activated	2.587	bias	2.09e-06	ATF3,CCL2,CCL3L3,CCL4,CSF1,CXCL2,DUSP4,GADD45A,GADD45B,GDNF,HMGCR,HPSE,ICAM1,MYBL1,PTGS2,PTPN1,SGK1,TIAM1,TIMP1,TNF	296 (20)
SMAD3	1.609	transcription regulator		1.597	bias	2.13e-06	CCL2,CCL3L3,CCL4,CXCL10,DUSP4,EDN1,GADD45B,ID2,IL12B,IL23A,IL2RA,IL9,JAG1,LPAR1,NOS2,PTGS2,RHOB,RUNX2,S1PR1,SMAD3,TBX21,TIMP1,TNF	270 (18)
IFN type 1		group	Activated	2.346	bias	2.38e-06	CCL5,CXCL10,IDO1,IFIH1,IFIT2,IL12B,IL27,IRF1,ISG15,STAT1	177 (13)
EBI3	2.6	cytokine	Activated	2.338	bias	2.38e-06	GADD45G,GBP2,ICAM1,IL10,IL12RB2,IL17A,IRF1,PIM1,STAT1,TBX21	215 (17)
alitretinoin		chemical drug	Activated	2.223	bias	2.38e-06	ABCA1,ADAMTS4,CCL20,CCL8,CD83,CPM,CXCL10,DHRS9,DUSP1,IL2RA,IRF1,ISG15,PLA2G15,PLTP,PPARA,SCD,SMAD3,SOAT1	287 (22)
PTH		other		1.813	bias	2.38e-06	BHLHE40,CCL2,CSF1,CXCL2,CYP27B1,CYP3A4,DUSP1,EFNB2,IGFBP3,IL33,ITGAV,NFIL3,PTGS2,RUNX2,SDC4,SMAD3,SOCS3,TFPI2	226 (19)
REL		transcription regulator	Activated	3.977	bias	2.47e-06	ACSL4,BACH2,CCL2,CCL4,CSF2,CXCL10,EZH2,FADS2,GADD45B,ICAM1,IER3,IL12B,IL23A,IL27,IL2RA,IL9,IRF4,NOS2,PLK2,PPP1R15A,RSAD2,TNF,TNFAIP3	246 (19)
ATM		kinase	Activated	2.147	bias	2.47e-06	CFLAR,DUSP1,GADD45A,GADD45B,GADD45G,IL10,IL12B,IL23A,IRF1,TGM2,TNF,TNFAIP3	214 (18)
RNA polymerase II		complex				2.48e-06	ALAS1,ARID5A,BLNK,CCL5,CD83,CSF1,CXCL2,DUSP1,GADD45A,GADD45B,GBP2,ICAM1,IGFBP3,IL12B,IL17A,IL1RN,IL2RA,MYBL2,NOS2,OSGIN1,PTGS2,RUNX2,SFN,SOCS3,TNF	235 (12)
doxorubicin		chemical drug	Activated	3.15	bias	2.59e-06	ATF3,BHLHE40,BIRC3,CDCP1,CFLAR,CLDN4,CTSB,DRAM1,DUSP1,DUSP5,EDN1,GADD45A,ID2,IER3,IRF1,JAG1,LGALS3,MET,MRC1,NOS2,NTN1,OSGIN1,PTGS2,PTTG1,RGS16,SFN,SMAD3,STAT1,TIMP1,TNF,UBE2S,UGCG	279 (20)
CD44		other		1.961	bias	2.61e-06	ACKR3,BIRC3,CCL4,CCL5,CCR7,CSF2,CTSK,GADD45A,IL10,IL1RN,IL2RA,ITGAV,LGALS3,LTBP2,MET,PARVB,PECAM1,SDC4,STEAP1,TIAM1,TNF	323 (18)
sphingosine-1-phosphate		chemical - endogenous mammalian	Activated	2.081	bias	2.66e-06	CCL2,CCL5,CXCL10,CXCL2,HSD11B1,ICAM1,IL27,NOS2,PTGS2,RUNX2,S1PR1,TIMP1,TNF	201 (18)
oleic acid		chemical - endogenous mammalian		-0.578	bias	2.68e-06	ABCA1,DGAT2,DUSP1,EDN1,GADD45A,GADD45B,HMGCR,ICAM1,IGFBP3,NOS2,PPARA,PTGS2,SCD,SOAT1,TNF	231 (19)
CD200		other		-0.764	bias	2.69e-06	CCL3L3,IDO1,IL10,MET,MRC1,NOS2,TNF	241 (21)
NTN1	2.769	other		-1.964	bias	2.69e-06	CCL22,CTSB,CXCL2,IL10,IL17A,PTGS2,TNF	261 (22)
tosylphenylalanyl chloromethyl ketone		chemical - protease inhibitor	Inhibited	-2.027	bias	2.69e-06	CCL2,CXCL2,ICAM1,NFKBIB,NOS2,PTGS2,TNF	232 (12)
F2RL1		g-protein coupled receptor	Activated	2.622	bias	2.83e-06	CCL2,CSF2,GBP2,GBP6,IL10,LIF,MSC,NOS2,PELI1,PTGS2,TNF	212 (19)
SRC (family)		group	Activated	2.256	bias	2.9e-06	ATP1A1,CCL2,ICAM1,IL10,IL12B,ITGAV,ITGB3,PTGS2,STAT1,TNF	200 (17)
medroxyprogesterone acetate		chemical drug		-1.877		3.21e-06	CCL2,CCL4,CCL5,CXCL10,CYP3A4,HSD11B1,ICAM1,IL10,IL12B,IL2RA,IL9,MET,SCD,SGK1,TFPI2,TNF	281 (20)
CARD9		other		0.764		3.4e-06	CCL5,CSF3,CXCL10,CXCL2,IL10,IL12B,IL23A,TNF	198 (16)
anakinra		biologic drug	Inhibited	-2.611	bias	3.4e-06	CCL2,CCL4,EDN1,ICAM1,NOS2,PIM1,PTGS2,TNF	265 (21)
bardoxolone methyl		chemical drug	Inhibited	-2.778	bias	3.4e-06	BIRC3,CCL3L3,CCL4,CFLAR,IL10,NOS2,PTGS2,TNF	239 (18)
DETA-NONOate		chemical reagent		1.724		3.52e-06	BIRC3,DUSP1,HMGCR,ICAM1,LOXL2,NOS2,PTGS2,TIMP1,TNF,TNFSF4	273 (21)
CBL		transcription regulator	Inhibited	-2.169	bias	3.52e-06	CCL3L3,CFLAR,CSF2RB,CXCL2,FLT3,IL12B,LAT,RUNX2,STAT1,TNF	274 (20)
FBXO42		other	Activated	2.219	bias	3.81e-06	CCL5,CSF1,ICAM1,STAT1,TNF	156 (7)
IL10RB		transmembrane receptor		1.342	bias	3.81e-06	ICAM1,IL10,SAA1,SOCS3,TNF	211 (17)
cis-urocanic acid		chemical drug	Activated	2.621	bias	3.83e-06	GADD45B,IGFBP3,KCNK1,PPIF,PTGS2,TNF,TNFAIP3	165 (7)
TLR6		transmembrane receptor	Activated	2.595	bias	3.83e-06	ATF3,CCL5,CSF2,IL12B,IL17A,IL23A,TNF	211 (19)
IL36B		cytokine				3.83e-06	CCL20,CD83,CXCL10,IL12B,IL17A,IL23A,TNF	215 (16)
TRAF3IP2		other	Activated	2.743	bias	3.87e-06	CSF2,CXCL10,CXCL2,IL17A,IL19,ISG15,NFKBIZ,TRAF4,ZC3H12A	264 (16)
lysophosphatidylcholine		chemical - other	Activated	2.621	bias	3.87e-06	CCL2,CCL3L3,CCL5,CSF2,HMGCR,ICAM1,IL2RA,NOS2,TNF	229 (17)
curcumin		chemical drug	Inhibited	-2.739	bias	4.12e-06	A4GALT,ABCA1,ADAMTS4,ADAMTS5,ATP6AP2,BIRC3,CCL2,CCL5,CDK6,CFLAR,CSF2,CYP3A4,EDN1,EZH2,GLUL,ICAM1,IL10,IL17A,MST1R,NOS2,PIM1,PPARA,PTGS2,RUNX2,SOCS3,TFRC,TNF,TOB1,VEGFB	220 (17)
CGAS		enzyme		1.954	bias	4.2e-06	CCL5,CXCL10,IFIT2,IFIT3,ISG15,RSAD2	110 (7)
NFKBIZ	1.927	transcription regulator		1.592	bias	4.2e-06	CSF2,CSF3,IL10,IL12B,IL17A,TNF	229 (18)
amphotericin B		chemical drug		1.468	bias	4.2e-06	CCL2,CCL4,GDNF,IL1RN,TIMP1,TNF	259 (12)
Ca2+		chemical - endogenous mammalian	Activated	4.107	bias	4.43e-06	ATF3,CCK,CD83,CTTN,CYP27B1,DUSP1,EDN1,FABP5,HMGCR,ICAM1,IL10,IL33,IRF1,ITPR1,KLF4,PPARA,PTGS2,PTTG1,RUNX2,SGK1,TGM1,TNF,TRPC6,UGCG	339 (23)
VTN		other		1.819	bias	4.46e-06	BHLHE40,EFNB2,ITGAV,ITGB3,PTGS2,RUNX2,SFN,TNF	218 (19)
LIF	5.92	cytokine	Activated	2.107	bias	4.47e-06	BATF,CCL3L3,CD9,CISH,CXCL10,CXCL2,GAL,HPSE,IL17A,IL2RA,IL7,IRF1,NMI,PECAM1,PELI1,PIM1,PTGS2,PTPN1,SOCS3,TIMP1,TNF	179 (15)
isotretinoin		biologic drug	Activated	2.173	bias	4.49e-06	ABCA1,CCL2,IFIT3,IGFBP3,IL12B,IL27RA,IRF1,PLA2G15,PTGS2,S100A2,TFRC,TNFAIP2	275 (21)
nifedipine		chemical drug		-1.382	bias	4.49e-06	ABCA1,CCL2,CTSL,CYP3A4,DUSP4,EDN1,HMGCR,NOS2,NR3C1,PTGS2,SGK1,TNF	268 (24)
bleomycin		chemical drug	Activated	3.309	bias	4.5e-06	CCL2,CCL22,CCL3L3,CCL5,CTSK,CXCL10,CXCL2,ICAM1,IL17A,IL27,KLF15,LTBP2,MRC1,PLA2G15,PTTG1,SDC4,TIMP1,TINAGL1,TNF	272 (17)
TRAF3		enzyme		0.144		4.53e-06	BIRC3,CCL5,CXCL10,CXCL2,EBI3,ICAM1,IL10,IL12B,ISG15,MET,TBX21,TNF,TNFAIP3	181 (13)
ethanol		chemical - endogenous mammalian		0.016	bias	4.56e-06	ABCA1,ACKR3,ATF3,CCL2,CCL5,CYP3A4,DUSP1,EDN1,GADD45A,GNAI1,ICAM1,IL10,IL12B,IL1RN,NMI,NOS2,NR3C1,PLK3,PPARA,PPP1R3C,PTGS2,RHOB,SCD,SGK1,STAT1,TFPI2,TIMP1,TNF,TNFAIP6,TRIB3	272 (23)
estrogen		chemical drug		1.901	bias	5.04e-06	ABCA1,CCK,CCL2,DUSP1,EPAS1,GAL,GJB2,HMGCR,ICAM1,IDO1,IL10,IL27,LIF,MYBL1,NFIL3,PIM1,PISD,PTGS2,PTTG1,PTX3,S1PR1,SERPINB9,SMAD3,TBX21,TNF	269 (20)
PTPN1	2.262	phosphatase		-0.707	bias	5.12e-06	ARID5A,CFLAR,CXCL2,DUSP1,DUSP2,IL23A,MET,NOS2,TMEM26,TNF	254 (23)
DCN		other		-0.966		5.12e-06	CXCL10,DUSP1,ICAM1,ITGAV,MET,NOS2,S1PR1,SDC1,SMAD3,TNF	260 (19)
ATF3	2.528	transcription regulator		-1.03		5.15e-06	ATF3,BIRC3,CCL5,CD83,GBP2,GBP6,HSPB1,ICAM1,IL12B,NOS2,PPP1R15A,RSAD2,TNF	232 (17)
COL18A1		other	Inhibited	-3.56	bias	5.15e-06	CCL2,EDN1,EFNB2,ICAM1,ITGAV,ITGB3,MXI1,NOS2,PECAM1,PTGS2,STAT1,TNF,TNFRSF21	205 (17)
apigenin		chemical - endogenous non-mammalian	Inhibited	-3.127	bias	5.18e-06	CCL2,CCL3L3,CCL4,CDK6,DGAT2,ICAM1,IL10,IL17A,LTA,NOS2,PTGS2,TNF	204 (17)
vorinostat		chemical drug	Inhibited	-2.421		5.19e-06	BFAR,BIRC3,CFLAR,CISH,DUSP1,EDN1,FADD,ICAM1,IL10,IL12B,IL17A,IRF1,LTA,MYBL2,NOS2,OSM,PTGS2,RUNX2,SOCS3,TNF,TRAF4	230 (17)
lipoarabinomannan		chemical - endogenous non-mammalian	Activated	2.449	bias	5.35e-06	CCL4,CXCL2,ICAM1,IER3,IRF1,STAT1,TNF	287 (20)
MET	2.137	kinase	Activated	2.103	bias	5.36e-06	ARID5A,CCL3L3,CD274,EDN1,HSPB1,INHBA,KLF4,LTA,NFKBIZ,PIM1,PLK2,PTGS2,SOCS3,TGIF1	208 (16)
MAPK8		kinase	Activated	3.531	bias	5.36e-06	ABCA1,ACSL4,B4GALT5,BIRC3,CCL5,CYP27A1,DUSP1,DUSP4,IL10,IL12B,IL2RA,LIF,NOS2,PTGS2,PTX3,TBX21,TNF,TNFAIP3	259 (20)
Calcineurin protein(s)		complex	Activated	2.095	bias	5.47e-06	CBLB,CCL5,DUSP1,ITPR1,NFIL3,PPARA,PTGS2,RNF128,RYR1,TNF,TRPC6	243 (21)
AHR		ligand-dependent nuclear receptor		1.257		5.75e-06	ADAMTS5,ARG2,CAMK2N1,CBR3,CCL5,COL27A1,CXCL10,CYP3A4,EDN1,EMILIN2,GADD45A,HMGCR,HUNK,IDO1,IL10,IL17A,IRF1,JAG1,LTBP2,NOS2,PPP1R15A,PTGS2,SAA1,SCD,SDC1,SHB,SOCS3,TNF	249 (20)
ALOX5		enzyme		0.311		5.78e-06	CTSK,DCSTAMP,ITGAV,ITGB3,NOS2,PPARA,PTGS2,TNF	246 (18)
CORT		other	Inhibited	-2.008	bias	5.78e-06	CCL3L3,CCL4,CCL5,CCR7,CXCL10,IL10,IL17A,TNF
BRD4		kinase	Activated	2.598	bias	5.8e-06	ACSL5,AMPD1,BHLHE40,CXCL2,HS1BP3,ICAM1,ID2,IL2RA,IL7R,IRF4,KCNQ5,LOXL2,PIM1,RNF125,TIMP1	181 (7)
N-cor		group		-1.664	bias	5.85e-06	ABCA1,CCL5,CDK6,CXCL10,CXCL2,ELOVL5,FADS2,IGFBP3,PTGS2,RAB20,RHOB,SCD,SGK1	266 (24)
S-nitrosoglutathione		chemical toxicant		-0.633		5.96e-06	BIRC3,CCL2,CCL5,CXCL10,ICAM1,IL12B,LIF,PTGS2,TNF	249 (20)
PTPN6		phosphatase		-1.882	bias	5.96e-06	CCL3L3,CCR7,CDK6,IL10,IL12B,IRF1,TBX21,TIMP1,TNF	256 (18)
fingolimod		chemical drug		-1.129	bias	6.13e-06	CD274,CXCL10,GDNF,ICAM1,IL10,PECAM1,RUNX2,S1PR1,TBX21,TNF	235 (20)
SP3		transcription regulator		1.432	bias	6.46e-06	ABCA1,ATF3,CCL20,CHI3L1,DUSP1,HPSE,IGFBP3,IL10,IL12RB2,ITGB8,KLF4,MET,PTGS2,PTPN1,PTTG1,SGK1,SLC39A8,STAT1,TCEAL1,TGM1,TIMP1	265 (17)
misoprostol		chemical drug		1.718	bias	6.53e-06	IL10,IL17A,IL23A,PTGS2,SOCS3,TNF	222 (19)
Fcgr3		group		-0.056	bias	6.53e-06	CSF2,CSF3,IL1RN,TBX21,TNF,TNFSF4	235 (18)
D609		chemical reagent		-1.664	bias	6.53e-06	CCL2,ITPR1,NFKBIB,NOS2,PTGS2,TNF	261 (17)
SMURF1		enzyme	Inhibited	-2.414	bias	6.53e-06	CXCL10,IRF1,NOS2,RUNX2,TRAF4,WFS1	189 (16)
PI3K (family)		group	Activated	2.788	bias	6.74e-06	ABCA1,BIRC3,CCL2,CD274,CFLAR,CXCL10,IL10,IL12B,IL17A,ISG15,NOS2,PTGS2,TGM2,TNF	259 (23)
rottlerin		chemical toxicant	Inhibited	-2.362	bias	6.84e-06	ABCA1,APOBEC3A,ATP6AP2,BIRC3,CDK6,CLDN4,ECE1,ICAM1,IL10,NOS2,PTGS2,TNF	233 (20)
FOS		transcription regulator		0.689	bias	7.24e-06	ALAS1,ATF3,CCL2,CCL5,CD164,CDON,CFLAR,CHI3L1,CSF3,CTSB,EDN1,ESM1,EZR,ICAM1,IL10,IL12B,IL23A,IL27,IL36G,LGALS3,LTBP2,MET,NFIL3,NR3C1,PLA2G4A,PLK2,PTGS2,PTTG1,SCD,SDC1,SELENBP1,SERPINB9,SOCS3,TIMP1,TNF,TNFRSF18,UGCG,ZHX2	258 (20)
MAP3K1		kinase	Activated	3.116	bias	7.3e-06	ATF3,BIRC3,CSF2,DUSP1,HSPB1,LOXL3,PLA2G4A,PTGS2,TIMP1,TNF	191 (15)
Ni2+		chemical reagent	Activated	2.635	bias	7.35e-06	BIRC3,CCL2,CCL20,CSF1,CXCL2,ICAM1,PTGES2	192 (9)
HSPD1		enzyme		1.903	bias	7.35e-06	CXCL2,ICAM1,IL10,IL12B,SOCS3,TBX21,TNF	199 (18)
TICAM2		other		1.246	bias	7.35e-06	CCL4,CCL5,CTSK,CXCL10,IL12B,IRF1,TNF	224 (19)
SELPLG		other	Activated	2.828	bias	7.41e-06	CCL2,CCL4,CXCL2,HCAR3,IDO1,IL10,SERPINB9,THBD	267 (18)
NCR1		transmembrane receptor		1.941	bias	7.43e-06	CCL3L3,CCL4,CCL5,CSF2,TNF	233 (17)
PIM3		kinase		1.477	bias	7.43e-06	IL12RB2,PECAM1,STAT4,TBX21,TNF
mastoparan		chemical toxicant	Inhibited	-2.216	bias	7.43e-06	ABCA1,CXCL10,IL12B,NOS2,TNF	243 (21)
8-oxo-7-hydrodeoxyguanosine		chemical - endogenous mammalian	Inhibited	-2.219	bias	7.43e-06	ICAM1,NOS2,PTGS2,TNF,TNFSF4	258 (22)
JUND		transcription regulator		0.651	bias	7.46e-06	ALAS1,CCL5,IL10,NOS2,RUNX2,SAT1,SDC1,SERPINB9,TBX21,TIMP1,TNF	292 (20)
cardiotoxin		chemical - other	Activated	3.606	bias	7.5e-06	ACSL5,CCL2,CCL3L3,CCL4,CCL5,CSF2RB,EZR,FBL,FLT3,IL1RN,IL7R,MRC1,NOS2,SNX5,TIMP1,TNF,TNFRSF18
ADIPOQ		other		0.402		7.5e-06	ACSL5,CCL2,CCL20,CCL5,CXCL10,DUSP1,ICAM1,IL10,IL12B,IL17A,NOS2,PPARA,PTGS2,SCD,SOAT1,TIMP1,TNF	235 (19)
SFTPA1		transporter	Inhibited	-2.317	bias	7.83e-06	CXCL10,CXCL2,ESM1,FRMD6,GFPT2,GPR68,IL10,IL2RA,MRC1,NOS2,SLC22A3,TNF	218 (16)
IGF2		growth factor		1.966	bias	8.2e-06	DUSP1,GADD45A,IER3,IGFBP3,IL10,MXI1,MYBL2,NOS2,PIM1,PTGS2,RGS16,RHOB,RWDD4,SAT1,SOCS3,TGIF1,THRA,ZFAND5	278 (22)
ICAM1	2.25	transmembrane receptor	Activated	2.95	bias	8.94e-06	CCL3L3,CCL4,CCL5,CXCL2,ICAM1,IL12RB2,IL17A,IL2RA,TNF	231 (17)
TLR8		transmembrane receptor	Activated	2.917	bias	8.94e-06	CCL2,CCL4,CCR7,CD83,CXCL10,CYP27B1,IL12B,IL27,TNF	202 (19)
lipid A		chemical toxicant	Activated	2.586	bias	8.94e-06	ABCA1,CCL2,CCL3L3,CCL5,CSF3,CXCL10,IL10,IL12B,TNF	249 (22)
HDL		complex		-0.8	bias	8.94e-06	ATF3,CCL2,CCL5,ICAM1,INSIG1,ITGAV,ITGB3,PTGS2,TNF	202 (17)
ciglitazone		chemical drug		-1.401		8.95e-06	ABCA1,CCL2,CCL5,CFLAR,ICAM1,IL10,IL12B,NFKBIB,NOS2,PTGS2,TGM1,TNF	253 (20)
DNASE2		enzyme	Inhibited	-2.404	bias	9.42e-06	CXCL10,CXCL2,IFIT3,IL10,ISG15,RSAD2,SLAMF8,TNF
C5		other	Activated	2.41	bias	9.82e-06	CCL3L3,CCL4,CXCL2,IL10,SOCS3,TNF	202 (15)
LAMA5		other	Activated	2.4	bias	9.82e-06	CCL3L3,CCL4,CSF3,CXCL10,STAT1,TNF	130 (7)
Angiotensin II receptor type 1		group	Activated	2.219	bias	9.82e-06	ATP1A1,CCL2,CCL3L3,CXCL10,EDN1,TIMP1	182 (11)
3M-002		chemical reagent		1.231	bias	9.82e-06	CD83,IL12B,IRF4,PTGS2,TNF,TNFSF15	241 (16)
CCR6		g-protein coupled receptor		1	bias	9.82e-06	CCL20,CCL3L3,CXCL10,IL10,IL12B,TNF	260 (12)
fontolizumab		biologic drug	Inhibited	-2.449	bias	9.82e-06	CCL8,IL12RB2,ISG15,RSAD2,TGM3,TNF
IGHE		other				9.82e-06	CCL22,CCL3L3,CCL5,CSF2,IL10,TNF	243 (23)
PRDM1		transcription regulator		-1.668		9.9e-06	ADA,ARG2,CCL20,CCR7,CHI3L1,CRISPLD2,CSF3,CXCL2,IL10,IL17A,IRF4,ITPR1,MSC,NOS2,PLA2G4A,RSAD2,SCARA5,SMAD3,TBX21,TNF,TNFAIP6	281 (20)
CFLAR	3.573	other		-0.412		9.92e-06	BID,CSF3,IFIT2,IL17A,IL2RA,ISG15,TNF	233 (18)
geranylgeranyl pyrophosphate		chemical - endogenous mammalian		-0.6		9.92e-06	ABCA1,CCL2,ICAM1,NOS2,PPARA,PTGS2,TNF	247 (22)
CYP7A1		enzyme		-0.709		9.92e-06	ABCA1,CXCL10,HMGCR,NOS2,PTGS2,TIMP1,TNF	165 (11)
MYC		transcription regulator	Activated	2.278	bias	1e-05	ABCA1,ACSL4,CAMK2N1,CD274,CD48,CD9,CDK6,CFLAR,CHST15,CTSB,CXCL10,DUSP1,DUSP2,DUSP4,DUSP5,EBI3,EDN1,EVPL,EZH2,EZR,FABP5,FADS2,FAM129A,FBL,GADD45A,GADD45B,GADD45G,GBP2,GLUL,GRK4,HMOX2,HSPB1,ICAM1,ID2,IER3,IL10,IL12B,INHBA,KLF4,MRC1,NMI,NOCT,PECAM1,PMP22,PPARA,PSAT1,PTGS2,RHOB,RSAD2,SAT1,SGK1,SLC38A1,TFRC,TGM1,TIAM1,TIMP1,TNF,TNS3,TOB1,UBE2S,ULBP3,YBX3	327 (21)
TCF7L2		transcription regulator	Activated	4.191	bias	1e-05	ADAMTS4,ARAP2,ATP6V1G1,ATP8B1,CAMK2N1,CARHSP1,ENPP4,EPAS1,FBP2,GAB1,GLUL,ID2,IL10,IL23A,JAG1,Ktn1,LBH,NPC1,NPC2,PARVB,PELI1,RASGEF1B,SLC22A23,SORBS3,TGIF1,TMEM2,YPEL2	143 (7)
NOS2	3.34	enzyme		1.482		1e-05	CCL2,CCL3L3,CCL4,CHI3L1,CXCL2,EDN1,GDNF,IFIT3,IL10,IL12B,IL17A,IL1RN,ISG15,ITIH4,LPAR1,NOS2,PTGS2,TIMP1,TNF	247 (18)
FLT3LG		cytokine	Activated	2.414	bias	1.03e-05	CCR7,CD83,CXCL2,FLT3,ICAM1,ID2,IL10,IL2RA,IL7R,TNFRSF18	251 (20)
FOXO3		transcription regulator	Activated	2.336	bias	1.06e-05	CFLAR,CTSB,CXCL10,ELOVL5,FABP5,GADD45A,GADD45B,GLUL,HMGCR,IER3,IFIH1,IL10,IL17A,INHBA,JAG1,MET,MXI1,NOS2,NRP2,NUPR1,OPTN,PPP1R15A,PRNP,PTTG1,SGK1,TNF	288 (21)
ABCA1	1.722	transporter	Inhibited	-2.714		1.09e-05	ABCA1,CCL3L3,CSF3,DGAT2,HMGCR,IL12B,NOS2,PTGS2,TNF	243 (19)
Cdc42		enzyme		0.378	bias	1.19e-05	BID,CSF1,CTSA,CTSB,CTSZ,LIF,NPC2,TNF
FASLG		cytokine		-1.121		1.19e-05	CCL2,CFLAR,CSF2,IL10,IL17A,RUNX2,STAT4,TNF	204 (18)
pravastatin		chemical drug		-0.583		1.21e-05	ABCA1,CCL2,CYP27A1,ENC1,ICAM1,IL10,NOS2,PPARA,SDC4,TNF	227 (17)
HMGB1		transcription regulator	Activated	2.475	bias	1.32e-05	CCL2,CCL20,CCL4,CD274,CD83,GLUL,ICAM1,IL10,IL17A,MRC1,PTGS2,TNF	239 (17)
CARD11		kinase	Activated	2.161	bias	1.32e-05	CCL3L3,CCL4,CCL5,CSF2,IL10,IL2RA,TNF	216 (19)
phospholipid		chemical - endogenous mammalian	Activated	2.233	bias	1.33e-05	CCL3L3,CCL4,CCL5,CXCL10,PTGS2	234 (17)
J11-Cl		chemical reagent		-1.342	bias	1.33e-05	CCL20,CSF2,CSF3,CXCL2,PTGS2	218 (15)
linoleic acid		chemical - endogenous mammalian		0.365	bias	1.34e-05	ABCA1,ACSL4,CCK,DUSP1,EDN1,ICAM1,NEDD4L,NOS2,PECAM1,PTGS2,SCD	222 (18)
KLK5		peptidase	Activated	2.449	bias	1.43e-05	CCL20,CXCL2,ICAM1,IL17A,IL23A,TNF	187 (12)
CXCL3		cytokine	Activated	2.418	bias	1.43e-05	CCL3L3,CCL4,CCL5,CXCL10,ICAM1,TNF	188 (14)
neuroprotectin D1		chemical - endogenous mammalian	Inhibited	-2.412	bias	1.43e-05	CCL20,IL10,IL23A,PTGS2,TNF,TNFAIP2	281 (14)
PTPN2		phosphatase				1.43e-05	CCL22,CCL3L3,IL10,NOS2,PPP1R15A,TMEM26	216 (17)
IL9	9.763	cytokine		1.526	bias	1.48e-05	CCL2,CCL20,CCL3L3,IL9,PECAM1,PIM1,SCIN,TNF	273 (19)
PPARA	2.035	ligand-dependent nuclear receptor		0.144	bias	1.48e-05	ABCA1,ACSL5,CTSL,CYP27A1,EDN1,ELOVL5,F11R,FABP5,FADS2,G0S2,GLUL,GPD2,HMGCR,HSD17B11,IGFBP3,IL10,IL12B,IL17A,IL1RN,INSIG1,MGLL,NOS2,PLTP,PPA1,PPARA,PRDX6,PTGS2,SAA1,SAT1,SCD,SELENBP1,TBX21,TNF	244 (21)
RBPJ		transcription regulator		-1.342	bias	1.5e-05	CSF1,CSF2,CSF3,DLL1,DLL4,DUSP1,EZH2,GDNF,GNAI1,IL17A,IL7R,IL9,INHBA,JAG1,LIF,SDC1	204 (11)
CLEC4E		other		1.987	bias	1.5e-05	CXCL2,IL10,IL17A,TNF	242 (19)
8-hydroxyguanine		chemical - endogenous mammalian		1.982	bias	1.5e-05	CCL20,CCL3L3,CXCL2,TNF
Stat1 dimer		complex		1.962	bias	1.5e-05	IRF1,NOS2,PIM1,TBX21
peptide T		biologic drug		1	bias	1.5e-05	ICAM1,IL10,ITGAV,TNF
CV 3988		chemical reagent		0	bias	1.5e-05	CCL2,ICAM1,ITGAV,ITGB3	144 (7)
HDAC11		transcription regulator		-1.981	bias	1.5e-05	IL10,IL17A,TNF,TNFSF4	168 (7)
COG112 peptide		chemical reagent		-1.997	bias	1.5e-05	CXCL2,IL17A,NOS2,TNF	156 (7)
GNA15		enzyme				1.51e-05	ACKR3,CCL20,CXCL2,GADD45A,GBP2,GDA,GLUL,HSD3B7,IL10,LGALS3,THBD,TIMP1,TRIB3	190 (12)
triamcinolone acetonide		chemical drug		-1.24		1.55e-05	ATF3,BHLHE40,BID,DUSP1,EFNB2,IGFBP3,INSIG1,KLF15,MXRA5,NOS2,NR3C1,PLK2,RGS16,SAA1,SCD,SLAMF1,SOAT1,TBC1D1,TNFSF4,ZFAND5
wortmannin		chemical - kinase inhibitor	Inhibited	-2.253	bias	1.58e-05	CCL2,CCL4,CCL5,CFLAR,CSF1,CXCL10,EZR,ICAM1,IL10,IL12B,IL17A,IL23A,IL2RA,IRF1,NOS2,PTGS2,SOCS3,TFRC,TNF	218 (17)
GFI1		transcription regulator	Inhibited	-3.508	bias	1.69e-05	CFLAR,CSF1,GUSB,ICAM1,ID2,IL10,IL7R,IRF1,LPAR1,LTA,SMAD3,STAT1,TNF	207 (14)
CXCL12		cytokine	Activated	2.905	bias	1.7e-05	CCL2,CCL5,CD33,CD9,CTSK,CXCL10,ICAM1,IL2RA,ITGB3,LOXL2,MAPK12,PTGS2,RHOC,RUNX2,RYR1,SOCS3,SORBS3,TIMP1,TNF	195 (17)
BCR (complex)		complex		1.877	bias	1.73e-05	CCL4,CCR7,CDK6,CFLAR,GBP2,IL10,IL23A,IL2RA,IRF4,KLF4,PIM1,PTGS2,S1PR1,SLAMF7,TBX21	242 (21)
LPIN1		phosphatase	Activated	2.072	bias	1.73e-05	HMGCR,IL12B,NOS2,PPARA,PTGS2,SCD,TNF	275 (22)
CCR1		g-protein coupled receptor		1.195	bias	1.73e-05	CCL3L3,CCL5,CTSK,ITGAV,ITGB3,RUNX2,TNF	298 (19)
CCL5	4.361	cytokine	Activated	3.22	bias	1.76e-05	CCL2,CCL3L3,CCL4,CCL5,CXCL2,DUSP1,PNP,PPIF,SGK1,STAT1,TNF	214 (16)
ADORA2B		g-protein coupled receptor		1.254	bias	1.84e-05	CXCL2,IL10,KLF4,MRC1,NOS2,RUNX2,TIMP1,TNF	242 (17)
xanthohumol		chemical - endogenous non-mammalian		-1.947	bias	1.84e-05	BIRC3,DGAT2,GAB2,ICAM1,NOS2,RUNX2,SCD,TNF	226 (16)
GNB2		enzyme				1.84e-05	CCL3L3,CCL4,CD83,DUSP1,IER3,MXI1,PLK2,THBD	165 (7)
GLI2		transcription regulator		0.577	bias	1.89e-05	CCL22,CCL3L3,CCL4,CCL5,CSF3,CXCL10,CXCL2,IL10,JAG1,NTN1,RUNX2,TNF,UGCG	222 (12)
vancomycin		biologic drug	Activated	2.173	bias	1.91e-05	BIRC3,CDCP1,CLDN4,CSF2,CXCL2,IER3,IL10,LGALS3,MRC1,SCD,TGIF1,TIMP1
Pkc(s)		group		1.637	bias	1.91e-05	ABCA1,ARG2,ATF3,CCL2,CTSB,DUSP1,EDN1,GADD45A,GADD45B,HMGCR,ID2,IL10,IL12B,KCNJ2,NOS2,PPARA,PPP1R15A,PTGS2,TGM1,TNF	279 (19)
GATA3		transcription regulator		-1.457		1.91e-05	BATF,CCL5,EVPL,GLUL,IL10,IL12RB2,IL17A,IL2RA,IL7R,IL9,KLF4,LTA,NFIL3,PPARA,STAT4,STAT5A,TBX21,TGM1,TNF,TWISTNB	256 (18)
BIRC3	2.313	enzyme		-1.109		2.04e-05	BIRC3,CCL2,CSF1,CSF3,ICAM1,TNF	213 (13)
triflusal		chemical drug	Inhibited	-2.38	bias	2.04e-05	CCL4,CSF1,CSF2,CSF3,PTGS2,TNF	171 (10)
Lh		complex	Activated	2.594	bias	2.06e-05	ARHGAP35,CFLAR,DUSP1,EZR,GEM,HSD11B1,ITPR1,NPC2,PRKX,PTGS2,PTPN1,PTX3,RGS16,RHOB,RUNX2,SGK1,SH3BP4,STAT1,TFPI2,TNFAIP3,TNFAIP6,YBX3	296 (23)
TNFRSF1B		transmembrane receptor	Activated	2.747	bias	2.1e-05	CFLAR,CSF2,CXCL2,ICAM1,IL12B,IL2RA,NOS2,NTN1,SAA1,SOCS3,TIMP1,TNF,TNFAIP3	209 (17)
FOXP3		transcription regulator	Inhibited	-2.128	bias	2.1e-05	DUSP4,EZH2,ID2,IL10,IL17A,IL2RA,IL7R,IL9,IRF4,NFIL3,TNF,TNFAIP3,TNFRSF18	275 (24)
EIF2AK2		kinase	Activated	3.375	bias	2.15e-05	ATF3,BHLHE40,IRF1,ISG15,ISG20,NMI,NOS2,PPP1R15A,SOCS3,STAT1,TNF,TNFAIP3	228 (19)
LECT2		other		1.536		2.21e-05	CCL3L3,CSF3,CXCL10,IL10,TNF	273 (14)
SR 144528		chemical reagent		-1.467	bias	2.21e-05	CCL2,CCL4,ICAM1,IL1RN,TNF	222 (19)
ebselen		chemical drug	Inhibited	-2.219	bias	2.21e-05	ICAM1,IDO1,NOS2,PTGS2,TNF	209 (22)
TAZ		enzyme				2.25e-05	ADAMTS5,CAMK2N1,CCL2,EDN1,ESM1,MET,PRSS23,RUNX2,S1PR1,TFPI2	159 (6)
HTT		transcription regulator		1.724		2.34e-05	ABCA1,ADAMTS4,ADAMTS5,AGRN,ATF3,ATP1A1,ATP8A1,BHLHE40,BID,CCK,CCL5,CD9,CTTN,DLL1,DUSP5,Foxp1,GADD45G,GLUL,HMGCR,HUNK,ITPR1,KCNJ2,KLF4,LTBP2,MEIS2,NFIL3,NOS2,OSBPL8,PDE10A,PDE1B,PPARA,PTPN23,RGS16,SGK1,STX1B,STX4,SYNDIG1L,TESC,TFRC,TGM2,THRA,TIAM1,TM4SF1,USP2	275 (22)
palmitic acid		chemical - endogenous mammalian	Activated	2.763	bias	2.46e-05	ATF3,BIRC3,CCL2,CCL3L3,CTSB,CXCL2,DGAT2,ICAM1,IL12B,NOS2,PPARA,PTGS2,PTPN1,SCD,SOCS3,THBD,TNF,TRIB3	217 (18)
ETS1		transcription regulator	Activated	2.371	bias	2.5e-05	B4GALT5,CCL2,CCL5,CDK6,CSF2,HPSE,ICAM1,ID2,IL10,IL12B,IL17A,IL2RA,IL7R,INSIG1,ITGB3,MET,NFIL3,RUNX2,TBX21,TNF	225 (17)
CLOCK		transcription regulator				2.51e-05	ACSL4,BHLHE40,GADD45A,GADD45B,GDNF,GIMAP4,ICAM1,IL18BP,LGALS8,NFIL3,NOCT,PPARA,PPIF,THBD,TNFRSF21,USP2
D-glucose		chemical - endogenous mammalian		1.74		2.75e-05	ABCA1,ADA,ATF3,ATP6AP2,CARS,CBR3,CCL2,CCL20,CFLAR,CTSB,CXCL2,DUSP1,EDN1,FABP5,FBP2,GLUL,HMGCR,HSPB1,ICAM1,IL17A,ITPR1,JAG1,NEU1,NOS2,NR3C1,PLK3,PPARA,PRDX6,PTGS2,SCD,SGK1,SLC39A8,TFRC,TGIF1,TGM2,TIMP1,TNF	277 (19)
SB 216763		chemical toxicant		1.572	bias	2.77e-05	BHLHE40,CCL2,CCL8,DLL4,NOS2,PTGS2,SCD,TNF	220 (19)
ANGPT1		growth factor		0.676		2.77e-05	CCL2,DLL4,DUSP1,DUSP4,DUSP5,EFNB2,ICAM1,JAG1	207 (18)
GNB1		enzyme				2.77e-05	CCL3L3,CCL4,CD83,DUSP1,IER3,MXI1,PLK2,THBD	165 (7)
Lymphotoxin		complex	Activated	2.425	bias	2.83e-05	CCL2,CCL5,CSF2,CXCL10,ICAM1,TNF	215 (12)
P2RX7		ion channel	Activated	2.219	bias	2.83e-05	CCL2,CCL20,CXCL10,IL23A,NOS2,TNF	218 (17)
Klra7 (includes others)		transmembrane receptor		1.52	bias	2.83e-05	CCL3L3,CCL4,CCL5,CSF2,TBX21,TNF	220 (17)
LIPG		enzyme		1.478		2.83e-05	ABCA1,CCL2,CSF1,IL10,PLTP,TNF	249 (22)
TRAIP		enzyme	Inhibited	-2.433	bias	2.83e-05	CSF3,IL10,IL17A,IL23A,IL27,TNF	185 (12)
etoposide		chemical drug	Activated	2.75	bias	2.84e-05	ATF3,BIRC3,CD274,CFLAR,CYP3A4,DUSP1,DUSP4,GADD45A,ID2,IER3,IFIT2,IL10,IL17A,IRF1,SGK1,TNF,TNFAIP3	251 (17)
ARNT		transcription regulator		1.48	bias	2.87e-05	BHLHE40,CCR7,CDCP1,CSF3,EDN1,EPAS1,ID2,IL10,ITGAV,ITGB3,LOXL2,S1PR1,SOCS3,TFRC	201 (15)
IL17C		cytokine	Activated	2.586	bias	2.88e-05	CCL20,IL17A,IL19,IL23A,IL36G,SGK1,TNF	263 (12)
ELF3		transcription regulator	Activated	2.224	bias	2.88e-05	CCL20,CSF2,EHF,IL12B,MET,NOS2,PTGS2	213 (17)
NPPA		other		-0.563		2.88e-05	DUSP1,EDN1,IL10,IL12B,NOS2,PTGS2,TNF	218 (17)
CXCL8		cytokine	Activated	2.217	bias	2.97e-05	ACKR3,CFLAR,CXCL2,ICAM1,IFRD1,IL2RA,LGALS3,MAPK12,NR3C1,PTGS2,TNF	286 (19)
Igm		complex		-1.092	bias	3.01e-05	CFLAR,DUSP2,IL10,IL17A,IL2RA,IRF4,PIM1,TNF,TNFSF4,UGCG	254 (26)
eicosapentenoic acid		chemical drug		-1.62		3.04e-05	CCL2,CD83,FADS2,IL10,IL12B,IL17A,IL2RA,MRC1,PPARA,PTGS2,SOAT1,TNF	227 (21)
IRF7		transcription regulator	Activated	4.042	bias	3.06e-05	CCL5,CCL8,CXCL10,GBP5,IDO1,IFIH1,IFIT2,IFIT3,IL27,IL33,IRF1,ISG15,ISG20,NMI,PELI1,RSAD2,STAT1	219 (18)
MTORC1		complex	Activated	2.138	bias	3.14e-05	HMGCR,IL17A,INSIG1,KLF4,NFIL3,NOS2,PTGS2,SCD,TNF	291 (25)
STAT2		transcription regulator	Activated	2.099	bias	3.14e-05	CCL5,CXCL10,IFIT2,IFIT3,IL10,IRF1,ISG15,RSAD2,TNF	193 (17)
SMAD7		transcription regulator		-1.923	bias	3.25e-05	CCL2,CCL5,CFLAR,CXCL10,GADD45A,ICAM1,ID2,IL12B,LTBP2,MET,NOS2,SCD,SMAD3,TIMP1,TNF	253 (22)
STAB1		transporter				3.3e-05	CCL3L3,IL10,TNF
pinoresinol		chemical - endogenous non-mammalian				3.3e-05	NOS2,PTGS2,TNF	178 (12)
GNLY		other				3.3e-05	CCL2,CCL5,TNF
epiallopregnanolone		chemical - endogenous mammalian				3.3e-05	LGALS3,PTGS2,TNF
CASP8		peptidase		-1.22		3.37e-05	BID,CCL22,CFLAR,CXCL10,IL2RA,IL33,IL9,TNF	212 (19)
NFE2L2		transcription regulator		1.12	bias	3.38e-05	ACSL5,ALAS1,ARHGEF3,ATF3,ATP1A1,CCL5,CTSK,CXCL10,CXCL2,DCSTAMP,EPAS1,GADD45G,IFRD1,IL10,IL1RN,LGALS8,MAFF,MGLL,MST1R,NOCT,NOS2,OSGIN1,PSAT1,PTGS2,PTPN1,S100A13,SAA1,SAT1,SOCS3,TNF	250 (21)
lysophosphatidic acid		chemical - other	Activated	3.355	bias	3.4e-05	CCL2,CCL4,CCL5,CSF1,CXCL10,CXCL2,DUSP1,EDN1,ICAM1,LIF,PTGS2,TNF	212 (18)
STAT5a/b		group	Activated	2.475	bias	3.4e-05	CISH,DUSP1,DUSP2,ID2,IL17A,IL2RA,IL9,IRF1,OSM,PIM1,PTGS2,SOCS3	206 (16)
RAP1B		enzyme	Activated	2	bias	3.42e-05	CCL3L3,CCL4,CCL5,CSF2	218 (19)
ULBP2		transmembrane receptor		1.982	bias	3.42e-05	CCL4,CSF2,LTA,TNF	162 (7)
LITAF		transcription regulator		1.951	bias	3.42e-05	CCL5,CCL8,IL10,TNF	222 (22)
CLIC4		ion channel		1.154	bias	3.42e-05	CCL5,CXCL2,IL12B,TNF	234 (17)
iguratimod		chemical drug		-1.953	bias	3.42e-05	CSF3,CXCL2,IL17A,TNF	206 (19)
gliotoxin		chemical toxicant		-1.982	bias	3.42e-05	BIRC3,CCL20,IER3,TNF	164 (8)
26s Proteasome		complex		-1.445	bias	3.48e-05	BIRC3,CCL2,CFLAR,CTSA,CTSB,ICAM1,PRNP,PTGS2,S1PR1,SOCS3,STAT1,STAT5A,TGM2,TRAF4,UBD,ULBP3	272 (20)
HAVCR1		other		-0.447		3.5e-05	CDK6,IL10,IL2RA,TBX21,TNF	172 (14)
mir-127		microrna		-0.582		3.5e-05	DUSP1,IL10,MRC1,NOS2,TNF	148 (7)
TGFBR2		kinase		-0.688		3.54e-05	ADAMTS5,BHLHE40,CXCL2,GADD45B,GAL,GJB2,HSD11B1,ICAM1,IL10,IL17A,RUNX2,SMAD3,SOCS3,TBX21,TGIF1,THBD,TIMP1,TNF	236 (15)
TNFSF12		cytokine	Activated	2.611	bias	3.54e-05	CCL2,CCL3L3,CCL5,CXCL10,CXCL2,DLL1,ICAM1,IL17A,KLF15,PTX3,TIMP1,TNF,TNFSF4	197 (16)
fenofibrate		chemical drug		1.025	bias	3.54e-05	ACSL4,ACSL5,CCL2,DGAT2,EDN1,FADS2,FBP2,GADD45A,GLUL,ICAM1,ID2,MGLL,MYBL2,NR3C1,PLTP,PPARA,PTGS2,SCD,THRA,TIAM1,TNF,VEGFB	248 (23)
TNFSF15	4.452	cytokine	Activated	2.613	bias	3.65e-05	BIRC3,CCR7,CD83,CSF2,CXCL2,IL17A,IL2RA	224 (15)
tosedostat		chemical drug		1.709	bias	3.65e-05	ATF3,CARS,GADD45A,PPP1R15A,PSAT1,SDC1,TRIB3
naringenin		chemical - endogenous non-mammalian		0		3.65e-05	CCL4,CCL5,CLDN4,CXCL10,NOS2,NR3C1,PTGS2	292 (22)
rolipram		chemical drug		-0.978		3.65e-05	CCL2,DUSP1,IL10,IL27,PTGS2,PTPN1,TNF	222 (19)
ANXA1		enzyme		-1.572	bias	3.65e-05	CCL2,CSF1,IL17A,IL2RA,NOS2,PLA2G4A,PTGS2	259 (19)
Gsk3		group		1.349	bias	3.81e-05	CFLAR,HMGCR,ICAM1,IL10,IL12B,NOS2,PTGS2,STAT1,TBX21,TNF,TNFAIP3	232 (22)
ITGAM		transmembrane receptor		1.258	bias	3.86e-05	CCL4,Foxp1,IL10,IL12B,PTGS2,TNF	207 (16)
MAPK12	2.138	kinase		1.029		3.86e-05	IL10,IL12B,IL17A,ITGB8,MAPK12,TNF	250 (20)
ACKR1		g-protein coupled receptor				3.86e-05	CCL2,ICAM1,PRDX6,TNFAIP2,TNFAIP3,UBD	146 (7)
Hsp70		group		1.76	bias	4.07e-05	CD83,ICAM1,IL12B,IL17A,NOD2,NOS2,NPC1,TNF	214 (17)
IL22		cytokine	Activated	2.382	bias	4.23e-05	CCL22,CD274,CXCL2,HSPB1,IL10,IL12B,IL17A,IL33,NOS2,SAA1,SOCS3,TNF	228 (20)
glutamine		chemical - endogenous mammalian		-0.923	bias	4.23e-05	ABCB5,ADA,CARS,DUSP1,FABP5,GADD45A,ICAM1,IL17A,KLF4,LTA,PTGS2,TNF	281 (23)
budesonide		chemical drug	Activated	2.121		4.3e-05	CCL3L3,CCL5,CSF3,CXCL10,CXCL2,GNAI1,ITPR1,NMI,NR3C1,RHOC,TNF	256 (18)
spironolactone		chemical drug		-0.144	bias	4.3e-05	CCR7,CYP27B1,CYP3A4,EDN1,GDNF,ICAM1,NR3C1,PTGS2,SCD,TNF,ULBP3	239 (20)
DYSF		other				4.3e-05	ABCA1,CD48,CD83,CXCL10,HSPB1,ITGB3,LGALS3,MRC1,PRSS23,S100A13,TIMP1
NKX3-1		transcription regulator				4.32e-05	CTSB,CTSZ,ETV3,IGFBP3,PIM1,SDC1,SDC4,SOAT1,STEAP1
fulvestrant		chemical drug		0.999		4.47e-05	CCL2,CCL5,CSF1,CTSL,CXCL10,GAB2,GADD45A,GAL,GJB2,ICAM1,ID2,IER3,IRF1,ITGB3,NOS2,PLK2,PRSS23,PTGS2,PTTG1,SERPINB9,TFRC,TNF	306 (20)
TNFSF14		cytokine	Activated	2.413	bias	4.59e-05	BIRC3,CCL20,CCL5,CXCL10,ICAM1,INHBA,TNF	240 (18)
TYK2		kinase	Activated	2.197	bias	4.59e-05	CD274,CSF3,IL12B,IL17A,IL23A,IRF1,SOCS3	223 (16)
PLP1		other		1.622	bias	4.59e-05	CCL2,CCL20,CXCL2,IL10,IL17A,TIMP1,TNF	233 (17)
IFIH1	1.732	enzyme		1.38	bias	4.59e-05	CCL5,CISH,CXCL10,CXCL2,IL12B,ISG15,TNF	202 (20)
clodronic acid		chemical drug		0.729	bias	4.59e-05	CXCL10,ICAM1,IL10,IL17A,IL27,MRC1,TNF	293 (16)
bafilomycin A1		chemical drug		-0.342	bias	4.59e-05	CD9,CXCL10,IDO1,NOS2,PTGS2,TNF,TRIB3	274 (20)
ABCG1		transporter	Inhibited	-2.541	bias	4.59e-05	CCL3L3,CSF3,IL10,IL12B,IL12RB2,IL17A,TNF	262 (21)
NR4A1		ligand-dependent nuclear receptor		-1.89		4.79e-05	ACSL4,ATF3,CCL5,CSF1,EHF,FBP2,G0S2,ICAM1,IL10,IL12B,IL2RA,PPP1R3C,SAT1,SCD,SMAD3,SOAT1,TNF	239 (16)
CD2		transmembrane receptor	Activated	2.678	bias	4.88e-05	CCR7,CD48,CSF2,ICAM1,IL10,STAT1,STAT4,TNF	195 (16)
RPS6KB1		kinase		1.746	bias	4.88e-05	ATP1A1,CFLAR,CXCL10,HMGCR,IL10,IL12B,IL17A,ISG15	267 (24)
carbon tetrachloride		chemical toxicant	Activated	3.375	bias	5.09e-05	ATF3,CCL3L3,CCL4,CCL5,CXCL10,DUSP1,GADD45A,GADD45B,HSPB1,ICAM1,MGLL,NOS2,PECAM1,PPP1R15A,PRNP,PTGS2,SMAD3,TIMP1,TNF	217 (18)
HSP90AB1		enzyme	Activated	2.219	bias	5.16e-05	ATF3,CFLAR,EPAS1,IL17A,LAT,NOS2	227 (18)
IFNA10		cytokine	Activated	2.191	bias	5.3e-05	CCL8,CXCL10,IFIH1,ISG15,STAT4	180 (10)
IFNA5		cytokine	Activated	2.191	bias	5.3e-05	CCL8,CXCL10,IFIH1,ISG15,STAT4	180 (10)
IFNA7		cytokine	Activated	2.191	bias	5.3e-05	CCL8,CXCL10,IFIH1,ISG15,STAT4	180 (10)
IFNA14		cytokine	Activated	2.191	bias	5.3e-05	CCL8,CXCL10,IFIH1,ISG15,STAT4	180 (10)
IFNA6		cytokine	Activated	2.191	bias	5.3e-05	CCL8,CXCL10,IFIH1,ISG15,STAT4	180 (10)
IFNA21		cytokine	Activated	2.183	bias	5.3e-05	CCL8,CXCL10,IFIH1,ISG15,STAT4	180 (10)
PLCE1		enzyme	Activated	2.153	bias	5.3e-05	CCL2,CCL20,CXCL2,PTGS2,TNF	271 (18)
nystatin		chemical drug	Activated	2	bias	5.3e-05	CCL3L3,ICAM1,IL12B,TIMP1,TNF	231 (20)
muromonab-CD3		biologic drug		1.974	bias	5.3e-05	IL17A,IL2RA,TBX21,TFRC,TNF	287 (22)
CCL19		cytokine		1.941	bias	5.3e-05	CCR7,CSF2,CXCL10,IL10,TNF	223 (17)
spermine		chemical - endogenous mammalian		0.871		5.3e-05	CCL2,CCL4,RUNX2,SAT1,TNF	309 (26)
iloprost		chemical drug		0.365		5.3e-05	IL10,NOS2,PTGIR,THBD,TNF	267 (23)
N-(3-oxododecanoyl)-homoserine lactone		chemical reagent		0.343		5.3e-05	CSF1,CSF2,CXCL2,IL10,PTGS2	282 (16)
TRAF5		transporter		-0.93		5.3e-05	ICAM1,IL10,IL12B,IL17A,TNF	221 (19)
tunicamycin		chemical - endogenous non-mammalian	Activated	2.233	bias	5.37e-05	ATF3,BIRC3,CXCL2,DGAT2,GADD45B,HSD11B1,ICAM1,IFRD1,KLF4,NEDD4L,PPARA,PRNP,PTGS2,SCD,SIGMAR1,TNF,TRPC6,WFS1	230 (17)
bexarotene		chemical drug		0.887	bias	5.37e-05	ABCA1,CCK,CCL2,CYP3A4,DUSP1,DUSP5,GDNF,ICAM1,IL2RA,ITPR1,LOXL2,MAFF,NOS2,NRP2,PTGS2,SCD,TGM2,TM4SF1	302 (23)
2-amino-5-phosphonovaleric acid		chemical - other		-1.846		5.39e-05	ARID5A,BID,DUSP1,EXT1,FAM105A,GADD45A,GADD45B,GADD45G,IFRD1,LBH,NUDT9,PLK3,PTGS2,RASGEF1B,TNFAIP3
homocysteine		chemical - endogenous mammalian	Activated	2.907	bias	5.45e-05	ATF3,CCL2,CCL5,CXCL10,GADD45A,HMGCR,PTGS2,SAA1,SOCS3,TIMP1,TRIB3	243 (22)
LYN		kinase	Inhibited	-2.395	bias	5.45e-05	CCL3L3,CCL4,CCL5,CFLAR,CSF1,CSF2,IL17A,ITPR1,SOCS3,STAT5A,TNF	219 (18)
NOTCH1		transcription regulator	Activated	2.225		5.54e-05	BIRC3,CFLAR,CSF2RB,DLL1,DLL4,EFNB2,ESM1,ICAM1,ID2,IGFBP3,IL10,IL17A,IL2RA,IL7R,IL9,IRF1,JAG1,NOS2,PTGS2,RUNX2,TNF	226 (20)
GJA1		transporter		-0.436		5.71e-05	CCL2,GJB2,ICAM1,IL10,IL2RA,NOS2,TNF	243 (19)
parthenolide		chemical drug	Inhibited	-2.433	bias	5.71e-05	ADAMTS5,CCL2,CCL5,CXCL2,LIF,PTGS2,TNF	240 (18)
bezafibrate		chemical drug		1.818	bias	5.81e-05	ACSL4,ACSL5,INSIG1,LGALS3,MGLL,NOS2,NPC1,NPC2,PPARA,PTGS2,SCD,TNF	227 (19)
TYROBP		transmembrane receptor	Activated	2.598	bias	5.83e-05	CCL2,CCR7,CD83,ICAM1,IDO1,NOD2,RBM47,TNF	229 (17)
carrageenan		chemical - endogenous non-mammalian	Activated	2.579	bias	5.83e-05	CCL3L3,CCL5,CXCL2,ICAM1,NOS2,NR3C1,PTGS2,TNF	248 (17)
mir-146		microrna	Inhibited	-2.039	bias	5.83e-05	CCL2,CXCL10,DUSP1,FADD,IL10,PTGS2,STAT1,TNF	229 (16)
Irgm1		other	Inhibited	-2.781	bias	5.83e-05	CCL5,CXCL10,ID2,IFIT2,IFIT3,NUPR1,RSAD2,TNF	199 (7)
PIM1	2.796	kinase		1.245	bias	5.85e-05	ID2,IL10,IL12RB2,IL2RA,MET,PIM1,STAT4,TBX21,TNFRSF18	298 (24)
VDR		transcription regulator		0.05		5.95e-05	CSF2,CXCL10,CYP27B1,CYP3A4,GADD45A,ICAM1,IER3,IGFBP3,IL12B,IL1RN,NOD2,PTGS2,STAT4,THBD	271 (19)
FFAR3		g-protein coupled receptor		0.47		6.11e-05	CCL22,CCR7,CXCL10,FADS2,GBP2,GBP6,GPD2,ICAM1,KLF15,LOXL2,MLPH
lactacystin		chemical - protease inhibitor		1.436	bias	6.14e-05	ATF3,ATP1A1,CCL2,CD9,CFLAR,DUSP1,GNAI1,HSPB1,IFRD1,IL12B,NFKBIB,NOS2,NR3C1,OPTN,PTGS2,RUNX2,SAT1,TNF	267 (19)
GSK3B		kinase		0.203		6.34e-05	BIRC3,CCL2,CFLAR,DLL1,IL10,IL12B,IL19,NFKBIZ,NOS2,PMP22,PTGS2,RUNX2,TNF	252 (18)
TSC2		other	Inhibited	-3.041	bias	6.34e-05	ATF3,ATP6AP2,ATP6V1B2,ATP6V1G1,CXCL10,DPP7,FAM129A,HSPB1,LGALS3,NEU1,RASSF4,SCD,STAT1	197 (11)
ULBP1		transmembrane receptor	Activated	2	bias	6.66e-05	CCL4,CD83,IL2RA,TNF	152 (11)
HYOU1		other		1.96	bias	6.66e-05	IL12B,NOS2,PECAM1,TNF	230 (22)
U1 snRNP		complex		1.951	bias	6.66e-05	CCL4,CCL5,SLAMF7,TNF
sphingosylphosphocholine		chemical - endogenous non-mammalian		1.929	bias	6.66e-05	CCL2,ICAM1,TGM1,TGM2	203 (15)
ARF6		transporter		1.103	bias	6.66e-05	CCL5,ISG15,TNF,UGCG	212 (20)
orlistat		chemical drug		1	bias	6.66e-05	CCL2,CCL3L3,CYP3A4,ICAM1	137 (7)
BCG vaccine		biologic drug		0.577		6.66e-05	CCL2,IL10,IL17A,PTGS2	137 (7)
CD300E		other		-1.91	bias	6.66e-05	CD83,IL10,IL2RA,TNF
2',3'-dialdehyde ATP		chemical reagent		-1.982	bias	6.66e-05	CXCL10,NOS2,PTGS2,TNF	269 (19)
CISH	1.711	other		-1.982		6.66e-05	CISH,CXCL10,IL2RA,OSM	241 (17)
tocilizumab		biologic drug	Inhibited	-2	bias	6.66e-05	CCL2,CCL4,CCL5,IL10	170 (12)
PPT1		enzyme	Inhibited	-2	bias	6.66e-05	CCL4,CXCL10,OSM,TNF
ADGRF5	4.148	g-protein coupled receptor	Inhibited	-2	bias	6.66e-05	CCL3L3,CSF1,IL1RN,TNF	189 (17)
DEPTOR		other	Inhibited	-2	bias	6.66e-05	CCL20,CCL5,CXCL10,ICAM1	184 (12)
PLP2		transporter	Inhibited	-2	bias	6.66e-05	CD33,ICAM1,PECAM1,PLXNA1
tectorigenin		chemical - endogenous non-mammalian				6.66e-05	ICAM1,LPAR1,NOS2,TNF	193 (11)
ISGF3		complex				6.66e-05	IFIH1,IFIT2,ISG15,RSAD2
IL26		cytokine				6.66e-05	CCL20,ICAM1,IL10,TNF	182 (12)
FANCC		other				6.73e-05	FZD4,IGFBP3,JAG1,NOS2,NR3C1,PTGS2,PTX3,TBC1D9,TNF,TNFSF4	194 (11)
MAP2K7		kinase	Activated	2.213	bias	6.78e-05	ATF3,BIRC3,CCL5,CXCL10,EFNB2,PLA2G4A,RHOB,TFPI2,TNF	178 (16)
IFNK		cytokine	Activated	2.236	bias	6.79e-05	CD83,CXCL10,IFIH1,IRF1,STAT1,STAT4	280 (18)
USP18		peptidase	Inhibited	-2.219	bias	6.79e-05	CCL3L3,CTSK,CXCL10,IRF1,ISG15,SOCS3	232 (21)
2-aminopurine		chemical reagent	Inhibited	-2.392	bias	6.79e-05	CXCL10,IFIT2,ISG15,NOS2,PTGS2,TNF	244 (22)
dihydrotestosterone		chemical - endogenous mammalian		1.253	bias	6.85e-05	ABCA1,ACKR3,ALAS1,CHI3L1,FAM111B,Foxp1,G0S2,GLUL,HMGCR,HSPB1,ID2,IGFBP3,IL10,IL12B,JAG1,MAFF,MGLL,NEDD4L,NOS2,NR3C1,PPARA,PRNP,PTGS2,RHOB,RMI2,RUNX2,SCD,SDC3,SELENBP1,SGK1,SMAD3,STARD8,STAT5A,TGM2,TNF	343 (24)
kainic acid		chemical toxicant	Activated	3.336	bias	6.87e-05	APOLD1,ATF3,CCL3L3,CCL5,DUSP1,GADD45B,GDNF,NFIL3,NR3C1,PPP1R15A,PTGS2,SDC1,TIMP1,TMEM158,TNF	305 (24)
ALB		transporter	Activated	2.599	bias	6.93e-05	CCL2,CCL5,EDN1,HPSE,NOS2,PTGS2,SCD,TNF	238 (21)
GPX1		enzyme	Inhibited	-2.39	bias	6.93e-05	CCL3L3,CCL4,CXCL10,DUSP4,FADD,ICAM1,PRDX6,TNF	265 (20)
methylselenic acid		chemical reagent				6.98e-05	ACKR3,ATF3,BIRC3,BTD,CAMK2N1,CFLAR,GADD45A,HSD17B11,ID2,IRF1,KLF4,MYBL2,NEDD4L,NFIL3,NMI,RHOB,SAT1,SCD,SGK1,TNFAIP3,TNFRSF25	291 (12)
3M-011		chemical reagent	Activated	2.608	bias	7.05e-05	CCL4,CD83,CXCL10,ISG15,PTGS2,STAT1,TNF	183 (18)
Histone h3		group				7.06e-05	ACKR3,CCL2,CD9,CFLAR,CXCL10,DUSP2,HPSE,ICAM1,ID2,IGFBP3,IL10,IL17A,IL2RA,IL9,MEIS2,MET,MGLL,MYBL2,NOS2,OSGIN1,PTGS2,RAB38,RSAD2,RUNX2,SCD,SGK1,SOCS3,TBX21,TNFAIP3,ZNF239	278 (21)
LDLR		transporter		0.537		7.13e-05	ABCA1,CYP27A1,GJA5,HMGCR,ICAM1,IL10,IL12B,PLTP,PPARA,RUNX2,SCD,TNF	246 (19)
POR		enzyme	Inhibited	-2.345	bias	7.34e-05	ABCA1,BATF3,ELOVL5,FADS2,FLVCR2,GADD45B,GBP2,HMGCR,HSD17B11,INSIG1,NOCT,PRNP,SCD,SDC4,SDS,STAT1,UBD
JAK1/2		group	Activated	3.162	bias	7.63e-05	CCK,CCL2,GBP2,GBP5,GDA,IRF1,ISG15,NOS2,RSAD2,TNF	201 (13)
NFKB2		transcription regulator		1.147	bias	7.63e-05	BIRC3,CCL20,CCL5,CCR7,CD83,CFLAR,IL23A,IRF4,PTGS2,TNF	205 (13)
CYR61		other	Activated	3.111	bias	7.65e-05	CCL2,CCL3L3,CCL4,CXCL10,CXCL2,IL12B,ITGAV,ITGB3,NOS2,TIMP1,TNF	266 (19)
leukotriene C4		chemical - endogenous mammalian	Activated	2.232	bias	7.74e-05	CCL2,CCL4,ICAM1,PTGS2,TNF	236 (21)
monophosphoryl lipid A		chemical drug	Activated	2.221	bias	7.74e-05	CXCL10,IL10,IL12B,IL1RN,TNF	213 (19)
PROCR		other	Activated	2.214	bias	7.74e-05	CCL22,GBP2,GBP6,LIF,PELI1
IFNA8		cytokine	Activated	2.191	bias	7.74e-05	CCL8,CXCL10,IFIH1,ISG15,STAT4	200 (13)
IFNA16		cytokine	Activated	2.191	bias	7.74e-05	CCL8,CXCL10,IFIH1,ISG15,STAT4	180 (10)
SHARPIN		other		0.651	bias	7.74e-05	CXCL2,IL12B,IL33,MLKL,TNFAIP3	199 (14)
PTAFR		g-protein coupled receptor		0.136	bias	7.74e-05	CCL2,CCL3L3,CXCL2,PTGS2,TNF	280 (19)
ITIH1		other		-0.391	bias	7.74e-05	IL10,IL12B,NOS2,TNF,TNFAIP6	117 (5)
ginkgolide B		chemical drug		-1.206	bias	7.74e-05	CCL2,ICAM1,IL10,PECAM1,PRNP	188 (14)
10-nitrooleate		chemical - endogenous mammalian	Inhibited	-2.219	bias	7.74e-05	ICAM1,NOS2,PECAM1,PTGS2,TNF	240 (17)
EFNA2		kinase		0		7.82e-05	BACH2,CSF2,DUSP4,FABP5,NEDD4L,NFIL3,TGM1,TRIM2,UBE2S
TCF3		transcription regulator		0.333		7.85e-05	ADA,ATF3,BACH2,BID,BLNK,CDK6,GADD45A,GADD45B,GIMAP4,HS3ST1,HSD11B1,ID2,IL2RA,IL7R,KLF4,NFIL3,OPTN,RASSF4,RGS16,SCIN,SLAMF7,SOCS3,TNF,TOX,ZC3H12A	93 (5)
heparin		chemical - endogenous mammalian		0.132		8.63e-05	ALAS1,CD83,DUSP1,HPSE,ICAM1,IGFBP3,NOS2,RUNX2,THBD,TNFAIP6	238 (19)
OSCAR		other		1.964	bias	8.64e-05	CCL20,CD83,CXCL2,ICAM1,IL12B,IL1RN,TNF	211 (16)
IL23A	7.794	cytokine		1.524	bias	8.64e-05	CSF2,CXCL10,IL10,IL17A,IL9,NOS2,TNF	208 (16)
diclofenac		chemical drug		0.2		8.64e-05	CLDN4,IL10,IL2RA,LBH,NOS2,PTGS2,TNF	245 (21)
MTTP		transporter		-0.152	bias	8.64e-05	ABCA1,CCL3L3,CCL4,HMGCR,RUNX2,SOAT1,TNF	198 (10)
mir-30		microrna		-1.937	bias	8.64e-05	GADD45A,ITGB3,MYBL2,NEDD4L,RAB38,RUNX2,TNF
caffeic acid phenethyl ester		chemical drug	Inhibited	-2.83	bias	8.7e-05	CD83,CSF2,CTSB,CXCL10,CYP3A4,HSPB1,ICAM1,NFKBIB,NOS2,PTGS2,RHOB,TNF	239 (18)
TRPV4		ion channel	Activated	2.425	bias	8.81e-05	CCL3L3,CCL5,CXCL10,CXCL2,SOCS3,TIMP1	211 (14)
IFNA4		cytokine	Activated	2.375	bias	8.81e-05	CCL8,CXCL10,IFIH1,IFIT2,ISG15,STAT4	197 (17)
stearic acid		chemical - endogenous mammalian		1.71	bias	8.81e-05	ATF3,CCL3L3,EDN1,ICAM1,PTGS2,TNF	241 (18)
Ikb		group		1.009	bias	8.81e-05	CCL2,CFB,ICAM1,PTGS2,TNF,TNFAIP3	265 (14)
heme		chemical - endogenous mammalian		0.364	bias	8.81e-05	ALAS1,ICAM1,IL10,MRC1,NOS2,TNF	236 (19)
MGEA5		enzyme		-0.962		9.22e-05	ACSL4,CCL2,CCL20,CCL3L3,CD48,CDK6,CSF2RB,EFNB2,FERMT2,GADD45A,GADD45G,GLUL,HMGCR,HSD3B7,IGFBP3,IL23A,MAMLD1,MGLL,NFKBIB,RHOB,S100A2,SERPINB9,SOCS3,STAT1,TCF19,THRA,TIMP1	210 (7)
FYN		kinase		1.941	bias	9.64e-05	CCL4,CXCL10,DUSP1,IL17A,IRF4,PTGS2,SOCS3,TNF	235 (20)
BCL11B		transcription regulator		1.664	bias	9.64e-05	Foxp1,ID2,IL10,IL17A,IL2RA,IL7R,LTA,TNF	209 (15)
VitaminD3-VDR-RXR		complex		0.263	bias	9.64e-05	CCL5,CSF2,CXCL10,CYP27B1,GADD45A,IGFBP3,KLF4,THBD
PROC		peptidase		-1.627	bias	9.64e-05	CCL2,CXCL2,ICAM1,IL12B,NOS2,THBD,TNF,TNFAIP3	216 (17)
AGER		transmembrane receptor		1.464	bias	9.74e-05	CCL2,CCL3L3,CCL4,CSF1,CTSK,CXCL2,ICAM1,IL10,PTGS2,TNF	257 (19)
KLF6		transcription regulator		0.887		9.74e-05	ATF3,CCL2,CCL3L3,CXCL2,MRC1,NOS2,PPARA,PTGS2,TFPI2,TNF	213 (15)
Histone h4		group				0.000101	ADA,CCL4,CCL5,CFLAR,CXCL10,HPSE,ICAM1,IL2RA,IL9,IRF1,NEDD4L,PTGS2,RUNX2,SOCS3,TNF	261 (18)
nicotine		chemical drug		0.154	bias	0.000103	CCL2,CCL4,CTSK,CYP3A4,EDN1,ICAM1,IL10,IL12B,IL17A,LGALS3,NOS2,PTGS2,STAT1,TFPI2,TGM1,TNF,TRPC6	231 (22)
CD80		transmembrane receptor		1.15		0.000105	CBLB,ICAM1,IDO1,IL10,IL2RA,TBX21,TNF	246 (19)
thalidomide		chemical drug	Inhibited	-2.56	bias	0.000105	BIRC3,CFLAR,GADD45B,ICAM1,PECAM1,PIM1,TNF	242 (17)
mevastatin		chemical drug	Activated	2.099	bias	0.00011	ABCA1,HMGCR,KLF4,PTGS2,TNF	264 (17)
CGB3 (includes others)		other		1.4	bias	0.00011	IL17A,IL27,PTGS2,SGK1,TNFAIP6	161 (5)
TNFRSF6B		transmembrane receptor		0.095	bias	0.00011	CSF2,ICAM1,IL10,IL12B,TNF	200 (18)
CXCR2		g-protein coupled receptor		-1.195	bias	0.00011	CCL22,CCL3L3,CXCL10,IFRD1,IL10	193 (12)
GRN		growth factor				0.00011	CXCL2,ICAM1,IL10,IL12B,TNF	221 (15)
EPAS1	3.395	transcription regulator	Activated	3.243	bias	0.00011	ARG2,BHLHE40,BIRC3,CDCP1,CEMIP,CXCL2,EDN1,GADD45B,IGFBP3,ITGAV,ITGB3,ITPR1,LOXL2,MAFF,NFIL3,TMPRSS6,TNFAIP3,TNFSF15	30 (3)
N-acetyl-L-cysteine		chemical drug		-1.41	bias	0.00011	ATP1A1,CCL2,CCL20,CCL5,CFLAR,CXCL10,EDN1,ESM1,ICAM1,IL10,IL12B,IL23A,IL2RA,NOS2,OSGIN1,PTGS2,RHOB,TNF	205 (17)
SOD1		enzyme				0.00011	ATP1A1,BID,EZR,GDNF,HSPB1,ICAM1,IL10,INHBA,MET,MYBL1,NFIL3,NOS2,PRDX6,RUNX2,STAT4,TFRC,TNF,TNFAIP3	285 (18)
arotinoid acid		chemical toxicant	Activated	2.213	bias	0.000113	ABCA1,DUSP1,PLA2G15,PLTP,SCD,TNF	152 (12)
ELAVL1		other	Activated	2.771	bias	0.000116	ABCA1,ARG2,ATF3,CCL8,CD83,DUSP1,IL17A,IRF1,MYBL2,NOS2,PTGS2,SAT1	184 (12)
salmonella typhimurium lipopolysaccharide		chemical - endogenous non-mammalian	Activated	2	bias	0.000117	CCL5,NOS2,PTGS2,TNF
OGG1		enzyme		1.997	bias	0.000117	CCL20,CCL3L3,CXCL2,TNF
IFNL4		cytokine		1.997	bias	0.000117	CXCL10,IFIH1,ISG15,STAT1	168 (10)
IRF3 dimer		complex		1.982	bias	0.000117	CCL5,IFIT2,IL10,ISG15
ganglioside		chemical - endogenous mammalian		1.969	bias	0.000117	ICAM1,NOS2,PTGS2,TNF	214 (22)
C8		complex		1.718	bias	0.000117	CCL3L3,CFLAR,CXCL2,ICAM1	148 (7)
C9		other		1.718	bias	0.000117	CCL3L3,CFLAR,CXCL2,ICAM1	148 (7)
C7		other		1.718	bias	0.000117	CCL3L3,CFLAR,CXCL2,ICAM1	148 (7)
PD 168393		chemical - kinase inhibitor		1.332		0.000117	CCL2,CCL5,CXCL10,RGS16	282 (20)
NEK7		kinase		1	bias	0.000117	CXCL10,EDN1,ISG15,PTGS2
HA900		chemical reagent		0.254	bias	0.000117	CCL2,CCL5,IL10,SOCS3
IL12RB2	1.918	transmembrane receptor		-1.732	bias	0.000117	CSF2,IL17A,IL23A,TNF	249 (18)
BQ 123		chemical drug		-1.969	bias	0.000117	CCL2,CCR7,CXCL2,TNF	209 (17)
hexamethoxyflavone		chemical toxicant		-1.969	bias	0.000117	ICAM1,NOS2,PTGS2,TNF	242 (19)
UNC5B		transmembrane receptor	Inhibited	-2	bias	0.000117	CCL22,CXCL2,IL10,TNF
PTGDR		g-protein coupled receptor				0.000117	CSF2,NOS2,PTGS2,TNF	216 (16)
EGR2		transcription regulator	Activated	3.052	bias	0.000117	CBLB,CNTFR,HMGCR,ID2,IL10,IL17A,IL7R,IL9,PDE7A,PMP22,SCD,SOCS3,STAT5A,TBX21,TFRC	231 (18)
EGLN1		enzyme		0.734		0.000118	ADAMTS5,CCL20,EDN1,EPAS1,ICAM1,INHBA,PTGS2,SDC4,TNF	206 (18)
lipoxin A4		chemical - endogenous mammalian		-1.178	bias	0.000127	CCL2,ICAM1,IL10,NOS2,PTGS2,TIMP1,TNF	232 (19)
INHA		growth factor		-0.137		0.000127	BOC,CFLAR,EMILIN2,F11R,HSD17B11,INHBA,ITGA9,PRSS23,PTGS2,PTX3,SGK1,SMARCA1	168 (5)
tylophorine		chemical drug				0.000129	NOS2,PTGS2,TNF	271 (20)
A4GALT	1.697	enzyme				0.000129	IRF1,NOS2,TNF
CCL22	2.335	cytokine				0.000129	CCL3L3,CXCL2,TNF	134 (7)
SKLB023		chemical reagent				0.000129	NOS2,PTGS2,TNF	227 (16)
N-hydroxy-2,2-diphenylacetamide		chemical reagent				0.000129	EDN1,IL12B,TNF
(+)-epicatechin		chemical drug				0.000129	NOS2,PTGS2,TNF
verlukast		chemical drug				0.000129	CCL2,CCL4,TNF	236 (19)
ethyl linoleate		chemical - endogenous mammalian				0.000129	FADS2,NOS2,PTGS2
ferrous sulfate		chemical drug				0.000129	CCL3L3,CCL4,NOS2	132 (7)
ITGB1		transmembrane receptor		0.883	bias	0.00013	CCL2,ICAM1,IL12B,IL17A,IL1RN,ITGAV,ITGB3,NOS2,PTGS2,TNF,TNFAIP3	199 (16)
miR-146a-5p (and other miRNAs w/seed GAGAACU)		mature microrna	Inhibited	-3.26	bias	0.00013	CCL2,CCL8,FADD,IL10,IL12RB2,IL36G,NOS2,PTGES2,STAT1,TBX21,TNF	230 (17)
fish oils		chemical drug		-1.195		0.000132	CCL3L3,EDN1,IL10,IL17A,IL23A,NOS2,PPARA,PTGS2	198 (13)
GPS2		transcription regulator	Inhibited	-2.828	bias	0.000132	ABCA1,CCL20,CDK6,CXCL10,IL12B,RAB20,RHOB,SGK1	203 (12)
LEPR		transmembrane receptor		0.389		0.000132	CCL3L3,GADD45B,GADD45G,HMGCR,ID2,IDO1,IGFBP3,IL17A,IL18BP,IL1RN,LIF,NOS2,PPARA,SOCS3,TIMP1,TNF	284 (20)
miR-17-5p (and other miRNAs w/seed AAAGUGC)		mature microrna	Inhibited	-2.939	bias	0.000135	BAMBI,CRIM1,ITGB8,MYLIP,PPARA,RHOC,RUNX2,S1PR1,TNF
BTNL2		transmembrane receptor		0	bias	0.000138	CD109,CSF2,GJB2,GPD2,IL17A,PDE7A,RRAGD,SPECC1,TNF,YPEL2	152 (7)
berberine		chemical drug		-0.656	bias	0.00014	BIRC3,CCL2,CFLAR,HMGCR,ICAM1,IL10,NOS2,PPARA,PTGS2,SAT1,TIMP1,TNF	259 (21)
Tcf7		transcription regulator		-1.948	bias	0.000143	IL17A,IL2RA,IL7R,NR6A1,TBX21,TNF	200 (7)
RASSF1		other		0.493		0.000144	BHLHE40,EFNB2,IGFBP3,KLF4,LIF,MRAS,PLK2,PTGS2,TGM2,TMEM158,TUBB1	262 (14)
L-dopa		chemical - endogenous mammalian		-0.154		0.000146	ARG2,CBR3,CDC42EP2,CTSB,CTSZ,DGAT2,DPP7,DUSP1,ECE1,F11R,FADD,Foxp1,GDNF,GPD2,HEXA,HEXB,IDO1,IER3,IL18BP,INO80E,KCNK1,LAPTM5,LGALS8,MEIS2,NEDD4L,NOCT,NPC2,P2RY6,PLK2,PPP1R13B,RELL1,RENBP,SH3PXD2B,SYNDIG1L,TIAM1,TRIB3,TRIM25,UAP1L1,UPB1,VAT1
Pka		complex	Activated	2.677	bias	0.000146	CCK,CCR7,CXCL10,DUSP1,DUSP4,EDN1,HMGCR,IL23A,IL9,IRF1,NOS2,PTGS2,SGK1,TNF	246 (21)
3-deoxy-2-octulosonic acid(2)-lipid A		chemical - endogenous non-mammalian	Activated	2.236	bias	0.000151	CXCL10,HMGCR,NOS2,PTGS2,SOAT1	253 (20)
TNK1		kinase	Activated	2.236	bias	0.000151	IFIH1,IFIT2,IL10,ISG20,NOS2	182 (11)
NCR2		transmembrane receptor	Activated	2.19	bias	0.000151	CCL20,CCL4,CSF2,PTGS2,TNF	189 (11)
KLRC4-KLRK1/KLRK1		transmembrane receptor		0.169	bias	0.000151	IL10,IL17A,IL9,TNF,TNFSF4	220 (18)
PLC		group		0	bias	0.000151	CCL2,CXCL10,NOS2,PTGS2,TNF	267 (21)
IRAK1		kinase		0.784	bias	0.000152	ABCA1,CCL5,CXCL10,IL10,IL17A,IL23A,TNF	232 (22)
MERTK		kinase		-0.581		0.000152	CD274,IL10,IL17A,IL23A,INHBA,NOS2,TNF	233 (19)
TSC1		other		-1.886		0.000152	ATP6V1B2,FAM129A,IL12B,IL17A,RNF128,STAT1,TNF	210 (20)
UCHL1		peptidase		-0.333		0.000153	BACH2,HERC6,LBH,PDP2,PLA2G4A,PRSS23,SH2D4A,SLC39A8,TRIM2
Sn50 peptide		chemical toxicant	Inhibited	-2.932	bias	0.000153	BIRC3,CXCL10,CXCL2,CYP27B1,ICAM1,NOS2,PTGS2,TNF,TNFRSF21	253 (15)
MAPK7		kinase	Activated	2.158	bias	0.000153	CXCL2,DUSP1,EDN1,KLF4,PTGS2,THBD,TNF,TRAF4	297 (21)
NLRP3		other		1.353		0.000155	CCL4,CCL5,CSF3,CXCL10,CXCL2,IL17A,LIF,MRC1,PTTG1,TNF	228 (17)
phorbol esters		chemical - other	Activated	2.945	bias	0.000159	DUSP1,DUSP2,GRK4,IL10,IL2RA,LIF,OSM,PTGS2,TGM1,TIMP1,TNF	229 (20)
cisplatin		chemical drug	Activated	3.353	bias	0.000166	ATF3,BIRC3,CCL2,CCL5,CDCP1,CFLAR,CLCN6,CLDN4,CSF1,CTSB,CXCL10,CYP3A4,DRAM1,DUSP1,ECE1,EDN1,G0S2,GADD45A,HMGCR,ICAM1,ID2,IER3,IGFBP3,LGALS3,MEGF10,MET,MRC1,NMI,NOS2,PLK2,PLK3,PPARA,SAT1,SOCS3,TGIF1,TIMP1,TNF,TOB1,TRPM6,USP2	311 (20)
reactive oxygen species		chemical toxicant	Activated	2.922	bias	0.000166	ADAM9,CCL2,CCL5,CSF3,DUSP2,EDN1,GADD45A,HPSE,ICAM1,ITGB3,PTGS2,TNF,TNFAIP3	253 (18)
Notch		group	Activated	2.355	bias	0.000173	DLL4,DUSP1,GADD45B,ID2,IL10,JAG1,SMAD3,TBX21,TNF,TRPC6	263 (19)
cerivastatin		chemical drug		0.475		0.000173	CCL2,HMGCR,HSPB1,ICAM1,MYBL2,NOS2,PPARA,PTGS2,THBD,TNF	298 (21)
F2R		g-protein coupled receptor	Activated	2.393	bias	0.000173	CCL2,DUSP1,ECE1,ICAM1,IL17A,PTGS2,TFPI2,TGM2,TNFAIP3	203 (17)
AKT1		kinase	Activated	2.946	bias	0.000175	BIRC3,CCL2,CCL5,CFLAR,CISH,CXCL10,EZR,FABP5,HMGCR,HUNK,IL10,IL12B,KLF15,NOS2,PLA2G4A,PPARA,PTGS2,RHOB,SCD,TIMP1,TNF	200 (17)
pristane		chemical toxicant	Activated	2.376	bias	0.000179	CXCL10,IL12B,IL23A,ISG15,PTGS2,TNF	174 (7)
OSMR		transmembrane receptor		0.97	bias	0.000179	BIRC3,CFLAR,OSM,PIM1,SCD,TIMP1	195 (18)
CYLD		transcription regulator		1.937		0.000181	IL10,IL12B,IL17A,IL2RA,IL7R,SLAMF1,TNFSF4	242 (21)
conjugated linoleic acid		chemical drug		0.059		0.000181	CTSK,DUSP1,IL10,IL1RN,PTGS2,SOCS3,TNF	253 (21)
miR-1-3p (and other miRNAs w/seed GGAAUGU)		mature microrna	Inhibited	-4.056	bias	0.000184	AGMAT,AGRN,ATP6V1B2,CDCP1,FERMT2,GPD2,HPS4,KCNJ2,MET,MOV10,PIM1,PNP,RBM47,SDC4,SH2D4A,SH3PXD2B,TRIM2
MTOR		kinase		0.705		0.000186	CCR7,CD274,CFLAR,EPAS1,FABP5,FADD,HSD11B1,HSPB1,IL10,IL12B,IL17A,IL23A,IRF1,NOS2,PECAM1,PPARA,RUNX2,S1PR1,SOCS3,STAT1,TBX21,TNF,TNFRSF25	211 (19)
WNT3A		cytokine	Activated	2.505	bias	0.000189	ADAMTS4,CCL3L3,EDN1,EPAS1,GADD45G,GDNF,IL12B,KCTD12,KLF4,LBH,NOS2,NR6A1,PMP22,PTGS2,RUNX2,SDC4,TMEM158,TMEM2,TNF,TRIB3	247 (20)
farglitazar		chemical drug		1	bias	0.00019	ATP1A1,EDN1,NR3C1,SGK1
PELI1	1.593	enzyme		0.94	bias	0.00019	CCL5,IL12B,NOS2,TNF	210 (20)
PDE4B		enzyme		0.36	bias	0.00019	CCL5,CXCL10,DUSP1,TNF	245 (14)
TNFSF18	2.665	cytokine		0		0.00019	IDO1,IL17A,IL2RA,TNFRSF18	180 (7)
RPS6KA4		kinase		-0.095		0.00019	DUSP1,IL10,IL12B,TNF	260 (21)
ITGA4		transmembrane receptor		-0.762		0.00019	IL1RN,ITGAV,TNF,TNFAIP3	179 (11)
MMP8		peptidase		-0.762	bias	0.00019	CCL3L3,CXCL10,MET,NR3C1	174 (7)
SELE		transmembrane receptor		-0.849		0.00019	CCL3L3,CSF2,CSF3,TNF	226 (19)
sphingomyelin		chemical - endogenous mammalian		-1	bias	0.00019	ELOVL5,ICAM1,PLTP,SCD
PDK2		kinase		-1.154	bias	0.00019	IL10,IRF4,NOS2,TNF	153 (7)
IC87114		chemical - kinase inhibitor		-1.969	bias	0.00019	CCL5,ICAM1,IL17A,TNF	187 (12)
RNASEH2B		enzyme				0.00019	CCL5,CXCL10,IFIT3,ISG15
LAT2		other				0.00019	CCL3L3,IL10,IL12B,TNF	236 (22)
PIK3R1		kinase	Activated	2.192	bias	0.000192	ATP1A1,CCL4,CXCL10,ICAM1,IL12B,ISG15,NOS2,PTGS2,TNF,TRIB3	207 (19)
calphostin C		chemical - kinase inhibitor	Inhibited	-2.771	bias	0.000196	CCL2,CSF2,DUSP1,ECE1,ICAM1,NOS2,NTN1,PTGS2,TNF	211 (19)
NOD1		other	Activated	2.2	bias	0.000204	CCL5,CXCL2,DUSP1,NOS2,TNF	227 (19)
peroxynitrite		chemical toxicant		1.387	bias	0.000204	ICAM1,IDO1,NOS2,PTGS2,TNF	201 (18)
TACR1		g-protein coupled receptor		1.131	bias	0.000204	IL10,IL17A,IL23A,PTGS2,TNF	248 (17)
IL17R		complex		0.555	bias	0.000204	CCL2,CCL20,CCL5,CXCL10,TIMP1	188 (15)
BIRC2		enzyme		-1.4		0.000204	BIRC3,CCL2,CSF1,CSF3,TNF	183 (13)
ethyl pyruvate		chemical drug	Inhibited	-2.189	bias	0.000204	IDO1,IL10,NOS2,PTGS2,TNF	243 (21)
FHL2		transcription regulator		0.342		0.000204	CXCL10,IL10,IL12B,IL17A,IL23A,NOS2,S1PR1,TNF	250 (20)
APOA1		transporter		-0.857	bias	0.000204	ABCA1,ATF3,HMGCR,ICAM1,INSIG1,NOS2,PTGS2,TNF	237 (17)
salicylic acid		chemical drug	Inhibited	-2.589	bias	0.000204	CCL4,CFLAR,CSF1,CSF2,CSF3,NOS2,PTGS2,TNF	226 (12)
R5020		chemical reagent		1.091	bias	0.000214	BIRC3,DUSP4,DUSP5,GAL,IER3,IFIT3,SAA1,SGK1,STAT1,STAT5A	162 (5)
dehydroisoandrosterone		chemical - endogenous mammalian		-1.706		0.000214	HSD11B1,ICAM1,IL10,IL12B,IL17A,LGALS3,NOS2,PRDX6,SCD,TNF	241 (24)
TFEB		transcription regulator	Activated	2.616	bias	0.000215	ATP6V1B2,CCL5,CTSA,CTSB,CTSK,HEXA,NEU1
Pro-inflammatory Cytokine		group	Activated	2.183	bias	0.000221	CSF2,GLUL,ICAM1,NOS2,SDC4,SOCS3,SPINT1,TIMP1,UBD	208 (15)
EFNA1		other		-0.308		0.000221	BACH2,DUSP4,FABP5,HERC6,IL2RA,NEDD4L,TGM1,TRIM2,UBE2S
PPIF	1.827	enzyme	Activated	2.714		0.000234	CCL2,CCL20,CCL4,CCL5,CSF2,CXCL10,CXCL2,LIF,MEIS2,SLCO4A1,TNF	183 (12)
Gm-csf		group	Activated	2.395	bias	0.000235	CD83,ICAM1,IL10,MRC1,PIM1,PTGS2,SOCS3,TNF	211 (19)
mir-27		microrna		-1.198	bias	0.000235	ABCA1,DLL4,EDN1,IL10,MET,PPARA,PTGS2,TNF	277 (19)
A23187		chemical reagent	Activated	2.145	bias	0.000237	ATF3,CD83,CSF2,ICAM1,IL12B,INHBA,IRF4,LAT,LTA,PTGS2,S100A2,TNF	204 (16)
mir-15		microrna		0.045	bias	0.000249	CCL2,CCL5,CDK6,ISG15,PIM1,PTGS2,RNF125,TIMP1,TNF	173 (10)
CD3E		transmembrane receptor	Inhibited	-2.183	bias	0.000249	CBLB,CCL22,CSF2,IL10,IL2RA,LTA,NFKBIB,PTGS2,TNF	226 (20)
CDKN1A		kinase		-1.661	bias	0.000252	CCL2,CTSB,CTSK,DUSP1,INHBA,ITGAV,ITGB3,JAG1,LGALS3,MYBL2,PLK2,SAA1,TGM1,TNF,TNFAIP6,TNFRSF18,UBE2S,VGLL4	274 (20)
HSP90B1		other	Activated	2.56	bias	0.000253	IL12B,IL17A,IL23A,ITGAV,ITGB8,NOS2,TNF	208 (16)
corticosteroid		chemical drug		0.896		0.000253	DUSP1,IL10,IL1RN,IL27,NFKBIB,NOS2,TNF	268 (16)
NOS3		enzyme		-0.091		0.000253	ATF3,CCL2,ICAM1,IL12B,NOS2,PTGS2,TNF	214 (18)
RET		kinase		1.342	bias	0.000258	CCL2,CCL20,CSF1,CSF2,CSF3,CTSB,IL10,MET,PRNP,PTPN13,RNF19A,TNF	226 (14)
carboplatin		chemical drug	Activated	2.153	bias	0.000269	CD274,CDCP1,CLDN4,IER3,LGALS3,MRC1,TGIF1,TIMP1
iron		chemical - endogenous mammalian		-1.465		0.000269	GADD45A,GADD45B,GADD45G,PPP1R15A,SLC39A8,TFRC,TMPRSS6,TNF	189 (10)
TLR1		transmembrane receptor	Activated	2.189	bias	0.000269	CSF2,CYP27B1,IL12B,TNF,TNFAIP3	181 (14)
KLF13		transcription regulator	Activated	2.186	bias	0.000269	ALAS1,CCL5,IL10,IL9,TNF	169 (6)
PARP9		enzyme		1.172	bias	0.000269	IFIT2,IFIT3,IRF1,ISG15,STAT1	153 (7)
BCL2L11		other		0.391		0.000269	CCL3L3,CCL5,CXCL2,IL10,TNF	189 (13)
CD69		transmembrane receptor		-0.271		0.000269	CCL5,IL17A,IL2RA,S1PR1,TNF	181 (14)
zinc sulfate		chemical drug		-1.452		0.000269	IDO1,IL10,IL12B,NOS2,TNF	278 (21)
PTPRC		phosphatase	Activated	2.31	bias	0.000271	CCL3L3,CCL4,CCL5,IL10,IL7,TNF	224 (18)
EIF2AK4		kinase		1.45	bias	0.000271	ATF3,IL10,IL12B,PPP1R15A,PSAT1,TNF	185 (14)
NPC2	1.748	transporter		-1	bias	0.000271	CTSB,PLA2G4A,PTGS2,STAT1,STAT4,TNF	253 (19)
norepinephrine		chemical - endogenous mammalian		1.641	bias	0.000291	ABCA1,DUSP1,EDN1,GEM,IL10,IL12B,NOS2,PDE10A,PTGS2,SGK1,TBC1D1,TFRC,TINAGL1,TNF,WHRN	260 (21)
(E)-4-hydroxy-3-methyl-but-2-enyl pyrophosphate		chemical - endogenous non-mammalian		1.964	bias	0.000291	CCR7,IL2RA,OSM,TNF
ABCA4		transporter		-0.762	bias	0.000291	CCL3L3,CCL4,CFB,CXCL10	154 (9)
enoxacin		chemical drug		-1	bias	0.000291	ATP6V1B2,CTSK,DCSTAMP,ITGB3
teriflunomide		chemical drug		-1.124		0.000291	FADD,ICAM1,TNF,TRPC6	183 (12)
beta-cyclodextrin		chemical - endogenous non-mammalian		-1.154		0.000291	HMGCR,IL12B,PRNP,TNF	248 (22)
astragalin		chemical - endogenous non-mammalian		-1.982	bias	0.000291	ICAM1,NOS2,PTGS2,TNF	156 (7)
MALT1		peptidase				0.000291	IL10,IL17A,IL2RA,TNF	226 (20)
XPO1		transporter				0.000291	ICAM1,IGFBP3,MET,NOS2	204 (7)
CNTF		cytokine		-0.1		0.000291	CISH,CNTFR,IRF1,LIF,PDE10A,PDE1B,SCD,SOCS3,STAT1,TIMP1	192 (16)
zinc		chemical drug		-1.736		0.000291	CCK,IL10,IL17A,PTGS2,SCD,SELENBP1,SLC39A2,TFRC,TGM2,TNF	205 (19)
dalfampridine		chemical drug	Activated	2.646	bias	0.000297	ATF3,DUSP1,GADD45B,GADD45G,KLF4,MAFF,PTGS2	274 (21)
PRKAA		group		-0.314		0.000297	CXCL10,DUSP1,DUSP2,HSD11B1,NOS2,STAT1,TNF	262 (20)
H-7		chemical - kinase inhibitor	Inhibited	-2.608	bias	0.000297	ECE1,IFIT2,ISG15,LAT,PIM1,SAA1,SMAD3	184 (11)
NFKBIB	1.749	transcription regulator		0.436	bias	0.000307	CCL2,CCL5,CFLAR,CXCL2,ICAM1,NOS2,RYR1,TNF	201 (15)
nitrofurantoin		chemical drug		0.901		0.00031	CCL3L3,CTSB,CXCL10,GADD45A,HMGCR,IER3,IFRD1,IGFBP3,IL10,ITIH4,LGALS3,MET,SDC1,SELENBP1,TIMP1
ADORA2A		g-protein coupled receptor		-0.358		0.000311	ABCA1,ATP6V1B2,ATP8A1,CXCL10,CXCL2,DGAT2,DUSP1,FBL,IL10,IL12B,NOS2,PTGS2,TNF	286 (20)
ITGB3	4.69	transmembrane receptor	Activated	2.183	bias	0.000313	CSF1,IL10,ITGAV,ITGB3,OSM,PTGS2,RUNX2,SMAD3,TIMP1	201 (18)
CTLA4		transmembrane receptor		-0.409	bias	0.000313	CBLB,CD83,CXCL10,EBI3,ICAM1,IDO1,IL10,IL12RB2,IL2RA	241 (17)
W146		chemical reagent				0.000314	IL10,PTGS2,S1PR1
Trbv13-1		other				0.000314	IL10,IL12B,TNF
GPR68	6.813	g-protein coupled receptor				0.000314	CCR7,DUSP1,PTGS2	150 (7)
tofacitinib		chemical drug				0.000314	IL12B,IL17A,TNF	234 (21)
PARG		enzyme				0.000314	NOS2,PTGS2,TNF	163 (11)
SLAMF6		transmembrane receptor				0.000314	IL12B,IL17A,TNF	181 (7)
ADAM8		peptidase				0.000314	CCL5,CXCL10,TNF	164 (7)
HG-9-91-01		chemical reagent				0.000314	IL10,IL12B,TNF
2-cyclohexen-1-one		chemical - endogenous non-mammalian				0.000314	ICAM1,NOS2,PTGS2
pyridoxal phosphate-6-azophenyl-2',4'-disulfonic acid		chemical reagent				0.000314	IL23A,NOS2,PTGS2	238 (16)
picolinic acid		chemical toxicant				0.000314	CCL3L3,CCL4,NOS2	132 (7)
famotidine		chemical drug				0.000314	CXCL2,ICAM1,TNF	121 (7)
SD-282		chemical - kinase inhibitor				0.000314	CSF2,NOS2,TNF	243 (15)
L-826,141		chemical drug				0.000314	CSF2,IL12B,TNF
2-butenal		chemical toxicant				0.000314	CSF2,IL10,TNF	198 (13)
roflumilast		chemical drug				0.000314	CXCL2,NOS2,TNF	200 (14)
N-acetylglucosamine		chemical - endogenous mammalian				0.000314	NOS2,PTGS2,TNF	277 (17)
allosamidin		chemical reagent				0.000314	ABCA1,CCL2,TNF
TAC1		other	Activated	3.055	bias	0.000322	CCL2,CCL4,CSF2,CXCL10,IL17A,IL1RN,NOS2,PTGS2,TNF,TNFSF15	216 (17)
PRKD1		kinase		1.706	bias	0.00033	CFLAR,IL2RA,LOXL3,PTGS2,TNF,TNFAIP3	235 (21)
proteasome inhibitor PSI		chemical - protease inhibitor		-0.928	bias	0.00033	CCL4,CXCL2,CYP27B1,NOS2,RUNX2,SMAD3	271 (15)
POU5F1		transcription regulator		1.892	bias	0.000336	BFAR,BID,BIRC3,CHST15,CXCL10,DUSP1,DUSP4,DUSP5,EVPL,FADD,GADD45A,HOPX,INHBA,KLF4,LTA,MYBL2,PECAM1,PPARA,TGM1,TNF,TNFRSF21,TNFRSF25,TRAF4	185 (7)
PPP2CA		phosphatase		1.673	bias	0.000347	CFB,CXCL10,IL17A,IRF1,NOS2,PTGS2,SLAMF8	217 (18)
BCL3		transcription regulator		-1.652		0.000347	CCL5,CXCL10,ICAM1,ID2,IL10,IRF1,TNF	264 (18)
baicalein		chemical - endogenous non-mammalian	Inhibited	-2.186	bias	0.000347	CCL2,ICAM1,NOS2,PLA2G4A,PRDX6,PTGS2,PTTG1	226 (20)
telmisartan		chemical drug		-1.331		0.000349	CCL2,GDNF,ICAM1,MRC1,NOS2,PPARA,PTGS2,TNF	247 (19)
IFNL3		cytokine	Activated	2.236	bias	0.00035	IL12B,IL23A,IL2RA,ISG20,TNF	185 (13)
ammonium chloride		chemical drug	Activated	2.236	bias	0.00035	ATP1A1,CD9,CTSB,EDN1,NPC1
dipyridamole		chemical drug	Inhibited	-2.236	bias	0.00035	CCL2,NOS2,PTGS2,TIMP1,TNF	211 (17)
FGF7		growth factor	Activated	2.926	bias	0.00035	CSF1,FABP5,IL7,IRF1,LTA,RUNX2,SCD,SDC1,STAT1	224 (13)
allopurinol		chemical drug		1.897	bias	0.000355	BIRC3,CDCP1,CLDN4,CXCL10,IER3,LGALS3,MRC1,PTGS2,TGIF1,TIMP1	189 (13)
RXRA		ligand-dependent nuclear receptor		-0.333	bias	0.000366	ABCA1,ARG2,CCL20,CCL22,CXCL10,CYP27B1,CYP3A4,FABP5,FADS2,IER3,IL10,IL12B,INSIG1,PLTP,PPARA,SAT1,SCD,SDC1,THBD,TNF	248 (22)
celecoxib		chemical drug		-1.932		0.000387	BFAR,CFLAR,CLDN4,CTSK,GADD45A,ICAM1,IL7,MET,NOS2,PTGS2,TNF,TRAF4	301 (23)
ritonavir		chemical drug				0.000388	ABHD2,ALAS1,C9orf72,CARS,CYP3A4,FADS2,GBP2,HMGCR,HUNK,ICAM1,IFRD1,SCD,TNF	218 (18)
MAPK3		kinase	Activated	2.574	bias	0.00039	B4GALT5,DUSP4,IL10,IL2RA,PLA2G4A,PTGS2,SMAD3,TIMP1,TNF	216 (17)
PTGES		enzyme		1.446		0.000396	EZR,IL17A,NOS2,PPA1,PTGES2,PTGS2,SDS,TNF	226 (15)
diphenyleneiodonium		chemical reagent		-1.885	bias	0.000396	CCL2,CLDN4,CXCL2,DUSP2,EPAS1,PTGS2,TIMP1,TRPC6	249 (17)
3-methyladenine		chemical toxicant		1.763		0.000398	CXCL2,IL12B,IL23A,NOS2,PTGS2,TNF	215 (19)
resolvin D1		chemical - endogenous mammalian	Inhibited	-2.218	bias	0.000398	CCL2,CXCL2,IL10,IL23A,PTGS2,TNF	245 (18)
let-7a-5p (and other miRNAs w/seed GAGGUAG)		mature microrna	Inhibited	-3.689	bias	0.000401	CARHSP1,CDK6,COL27A1,FADS2,FAM105A,IFRD1,ITGB3,PTGS2,RBM19,RHOB,SCD,SIGMAR1,SLC38A1,TMEM2
methyl methanesulfonate		chemical toxicant	Activated	2.594	bias	0.000403	ATF3,GADD45A,GADD45B,GADD45G,KLF4,LIF,NMI	253 (15)
Ro31-8220		chemical - kinase inhibitor	Inhibited	-2.587	bias	0.000403	CCL2,DUSP1,DUSP4,ICAM1,LAT,NOS2,PTGS2	207 (18)
STAT1/3/5 dimer		complex		1.982	bias	0.000425	CHI3L1,CISH,EPAS1,SOCS3
CXCL1		cytokine		1.982	bias	0.000425	ICAM1,MRAS,SOCS3,TNF	256 (23)
TIGIT		other		1.677	bias	0.000425	IL10,IL9,IRF4,TBX21	232 (10)
U18666A		chemical reagent		1.091	bias	0.000425	ABCA1,CTSK,NPC1,TNF	250 (20)
SIRPA		phosphatase		-1.969	bias	0.000425	CCL3L3,CCL5,CSF3,TNF	231 (15)
highly active antiretroviral therapy		chemical drug				0.000425	IL2RA,IL7,IL7R,TNF	213 (13)
TNFRSF25	4.935	transmembrane receptor				0.000425	CCL2,CSF3,IL17A,TNF	229 (18)
amphetamine		chemical drug		1	bias	0.00043	ATF3,EFNB2,EZR,ICAM1,IL10,INHBA,MYBL1,SGK1,STAT4,TNFAIP3	217 (14)
L-glutamic acid		chemical - endogenous mammalian	Activated	2.425	bias	0.000436	CYP3A4,FADS2,GADD45B,HEXA,MGLL,NFIL3,NOS2,PTGS2,RUNX2,TIMP1,TNF	273 (17)
INSR		kinase		1.941	bias	0.000443	ACSL4,ACSL5,ATF3,CCL2,CCL4,CD83,CTSB,DUSP1,EDN1,GADD45A,HMGCR,IER3,MXI1,MYBL2,PIM1,PPARA,RGS16,RHOB,RWDD4,SAT1,SCD,SOCS3,TGIF1,THRA,TNF,ZFAND5	269 (21)
Fibrinogen		complex		1.929	bias	0.000447	CCL2,CCL3L3,CCL4,ICAM1,TNF	258 (19)
SOCS6		other		1.342		0.000447	CXCL2,IL23A,PTGS2,STAT5A,TNF	160 (7)
DLL1	1.898	enzyme		0.832	bias	0.000447	DLL1,DLL4,EFNB2,IL10,JAG1	142 (9)
cannabidiol		chemical drug		-1.103		0.000447	ID2,NOS2,PTGS2,TNF,TRPV2	189 (15)
ETS		group				0.000447	CHI3L1,ICAM1,IL12B,TIMP1,TNF
mangiferin		chemical - endogenous non-mammalian				0.000447	DGAT2,ICAM1,PPARA,PTGS2,TNF	243 (21)
KDM5B		transcription regulator		-0.862	bias	0.000448	AP4S1,FABP5,GADD45A,GAL,GJB2,INSIG1,ISG15,MPC1,NMB,OSER1,SAT1,SPTSSA,STAT5A
C5AR1		g-protein coupled receptor		1.886	bias	0.000448	CSF3,CXCL2,IL12B,IL17A,IL23A,IL27,LTBP2,TNF	204 (17)
TWIST1		transcription regulator		0	bias	0.000458	CCK,CCL2,CHI3L1,CLDN4,EFNB2,EZH2,ITGB3,MET,RHOC,RUNX2,SDC3,TBX21,TNF,TNFRSF21	135 (7)
RETN		other	Activated	2.431	bias	0.000466	CCL2,EDN1,ICAM1,PTGS2,SCD,SOCS3,TNF	230 (19)
CRP		other		0.186	bias	0.000466	CCL2,CCL3L3,CCL5,IL10,IL1RN,NOS2,TNF	266 (20)
RAC2		enzyme				0.000466	CCL3L3,CCL4,EFNB2,LTA,PMP22,RUNX2,STAT4	214 (15)
Insulin		group	Activated	2.578		0.000468	ARG2,CCL2,CCL4,CFLAR,DUSP1,DUSP4,EDN1,EPAS1,FADS2,HMGCR,HPSE,HSD11B1,ICAM1,IGFBP3,KLF4,NFIL3,NOS2,NR3C1,PPARA,PPP1R15A,PRDX6,SCD,SGK1,TBX21,TNF	285 (23)
ZBTB7B		transcription regulator				0.000477	CCL3L3,CSF2,IL10,IL17A,KLF4,TNF	30 (4)
RORC		ligand-dependent nuclear receptor		1.459	bias	0.000489	CCL20,CCL5,CISH,CSF2,CXCL2,GADD45B,HMGCR,IL17A,IL2RA,NOCT,PPP1R3C,SELENBP1,SLC15A4,TNF	180 (13)
rotenone		chemical toxicant		0		0.000505	BIRC3,CFLAR,CXCL2,IL10,NOS2,PTGS2,TIMP1,TNF	265 (19)
SCD	1.643	enzyme		-1.478	bias	0.000505	ABCA1,ATF3,CCL3L3,CXCL10,GADD45A,NOS2,PTPN1,TNF	226 (17)
luteolin		chemical - endogenous non-mammalian	Inhibited	-2.79	bias	0.000505	CDK6,CXCL10,ICAM1,IL12B,IL27,NOS2,PTGS2,TNF	196 (18)
plicamycin		chemical drug		-1.718	bias	0.000515	ABCA1,ADAMTS4,B4GALT5,CCL2,GJB2,HMGCR,MET,SEMA7A,SOCS3,TESC,TIMP1	227 (14)
EHF	3.223	transcription regulator	Activated	2.345	bias	0.000518	BLNK,CCL20,EHF,GPR68,IL1RN,JAG1,MET,SAA1,THBD,TIMP1
RARB		ligand-dependent nuclear receptor		1.023	bias	0.000518	CXCL2,EZR,GADD45A,ICAM1,IGFBP3,ITGAV,PTGS2,STAT1,TGM1,THBD	305 (24)
cocaine		chemical drug	Activated	3.949	bias	0.000522	BHLHE40,CCL2,CXCL2,DUSP1,DUSP5,EFNB2,FRMD6,GADD45A,GADD45B,ICAM1,INHBA,MECP2,NOS2,SIGMAR1,STAT1,TNF	255 (23)
ETS2		transcription regulator	Activated	2.777	bias	0.000535	CSF3,CYP27A1,HPSE,ICAM1,IL12B,IL2RA,NOS2,TIMP1,TNF	259 (16)
MAP2K6		kinase		1.96	bias	0.000535	CCL2,CCL8,CD83,CXCL10,IFIT2,ISG15,NOS2,PTGS2,STAT1	279 (18)
FOSL1		transcription regulator		-0.563		0.000535	CCL2,CCL3L3,CCL4,CSF3,IL10,MET,RUNX2,THBD,TNF	229 (16)
PP2/AG1879 tyrosine kinase inhibitor		chemical - kinase inhibitor	Inhibited	-2.355	bias	0.000535	BIRC3,CCL2,DUSP1,EDN1,ICAM1,IL10,IL2RA,PTGS2,RHOC	202 (16)
LTA	6.131	cytokine		1.942	bias	0.000536	CCL20,IL10,IL17A,ITGAV,ITGB3,LTA,PTGS2	235 (15)
Ins1		other		1.562	bias	0.000558	ALAS1,ATP1A1,CCK,CCL5,DGAT2,EDN1,FADS2,FBP2,HMGCR,IGFBP3,IL10,NOS2,PPARA,PTGS2,RUNX2,SCD,SOCS3,STAT5A,STX4,TBX21,TIMP1,TNF	223 (18)
Mapk		group	Activated	2.796	bias	0.000559	ADA,CCL2,CFLAR,CLDN4,IL17A,NOS2,NR3C1,PTGS2,RUNX2,STAT1,TNF	226 (19)
PTGER2		g-protein coupled receptor	Activated	2.529	bias	0.000559	CCR7,IL10,IL17A,IL23A,IL36G,NOS2,PIM1,PTGS2,TIMP1,TNF,TNFAIP6	207 (16)
Tnf receptor		group		1.009	bias	0.000563	CCL20,IL10,NOS2,TIMP1,UBD	250 (18)
ilomastat		chemical drug		1.004		0.000563	CCL2,CCL5,CXCL10,F11R,TNF	221 (21)
IL15RA		transmembrane receptor		-0.351	bias	0.000563	EDN1,IL10,IL17A,IL2RA,TNF	239 (22)
piceatannol		chemical - endogenous non-mammalian	Inhibited	-2.2	bias	0.000563	CCL2,ICAM1,NOS2,PTGS2,TNF	249 (20)
ELANE		peptidase	Activated	2.414	bias	0.000567	CCL3L3,CTSB,CXCL2,LTB4R,OSM,TNF	254 (22)
Am 580		chemical toxicant	Activated	2.397	bias	0.000567	DUSP1,IRF1,NOS2,TGM2,THBD,TIMP1	141 (7)
TNC		other		1.387	bias	0.000567	ADAMTS4,CCL2,CCL20,ID2,MET,TNF	282 (21)
CYP27B1	2.003	enzyme		-1.342	bias	0.000567	CCL20,CCL3L3,CCL4,CYP27B1,CYP3A4,IL10	164 (7)
AR		ligand-dependent nuclear receptor	Activated	2.635	bias	0.000581	ABCA1,ACBD7,CCL3L3,CFLAR,EDN1,EPAS1,FABP5,GDNF,GUSB,HMGCR,IGFBP3,KCNJ2,MRAS,NPC1,NR3C1,NUPR1,RASSF3,RHOB,SGK1,SLC39A8,SMAD3,STAT1,STEAP2,TCF19,TMEM158,TNF,TNFAIP2,TRIM25	287 (23)
IL1RAP		transmembrane receptor	Activated	2	bias	0.000598	CCL20,CSF2,CXCL10,TNF	226 (17)
SYK/ZAP		group		1.951	bias	0.000598	IL10,PTGS2,TIMP1,TNF	204 (16)
LILRA2		other		1.067	bias	0.000598	CSF3,IL10,MRC1,TNF	141 (7)
PTGER1		g-protein coupled receptor		0.739	bias	0.000598	GDNF,ICAM1,IL10,PTGS2	261 (16)
DOK1		kinase		-0.218		0.000598	IL2RA,STAT4,TBX21,TNF	214 (14)
cyclomaltodextrin		chemical drug		-0.555		0.000598	CCL3L3,CSF3,CTSK,TNF	160 (7)
ibrutinib		chemical drug		-1.067		0.000598	CDK6,IDO1,TNF,UGCG	203 (14)
NBEAL2		other		-1.98	bias	0.000598	CCL3L3,CCL4,CXCL10,CXCL2
6-aminopyrazolopyrimidine derivative compound II		chemical - kinase inhibitor		-1.982	bias	0.000598	CCL3L3,IL10,ISG15,TNF	160 (10)
mannosylated lipoarabinomannan		chemical - endogenous non-mammalian				0.000598	IL10,IL12B,NOS2,TNF	223 (17)
CLEC10A		other				0.000598	CSF2,CXCL2,IL10,TNF
TLE1		transcription regulator				0.000598	ATF3,DUSP1,MEIS2,NUPR1
CCL3L3	4.918	cytokine				0.000598	CCL4,CCL5,CXCL10,TNF	216 (11)
RHOB	1.833	enzyme				0.000598	ITGB3,NOS2,PTGS2,RHOB	248 (20)
blinatumomab		biologic drug				0.000614	CCL2,CCL4,IL10
5R-hydroxytriptolide		chemical drug				0.000614	IRF1,NOS2,STAT1
TLR2/TLR4		group				0.000614	IL12B,IL23A,TNF	192 (11)
KCNK2		ion channel				0.000614	CCL2,ICAM1,PECAM1	179 (11)
[truncated: 1,649 more rows]

## Sheet: ST103_contr_down(DE882)
© 2000-2018 QIAGEN. All rights reserved.
[truncated: 1,998 more rows]

[truncated: 4 more sheets: ST12_contr_up(DE934), ST12_contr_down(DE845), ST12_ST103up(DE42), ST12_ST103down(DE18)]
